# Supplementary material for: Ume6 protein complexes connect morphogenesis, adherence and hypoxic genes to shape Candida albicans biofilm architecture
Source: Nat Microbiol. 2025 Aug 21;10(9):2231–44. doi: 10.1038/s41564-025-02094-5 (PMC12408341; doi:10.1038/s41564-025-02094-5)
Supplement: Supplementary file 3 — RNA-seq results. [file 41564_2025_2094_MOESM3_ESM.xlsx]

## Sheet: Legend
	Description
Tab 1	Log2FC and padj from RNA-seq analysis
Tab 2	Differentially expressed genes in each comparison
Tab 3	Expression levels of Efg1 core-targets (with core-targets defined by Do et al., 2022).
Tab 4	Intersections between DEGs from RNA-seq and Efg1 core-targets (with core-targets defined by Do et al., 2022).
Tab 5	Expression levels of hypha-associated genes (with the hypha-associated gene set defined by defined by Cravener et al., 2023).
References
Do E, Cravener MV, Huang MY, May G, McManus CJ, Mitchell AP. Collaboration between Antagonistic Cell Type Regulators Governs Natural Variation in the Candida albicans Biofilm and Hyphal Gene Expression Network. mBio. 2022 Oct 26;13(5):e0193722. doi: 10.1128/mbio.01937-22. Epub 2022 Aug 22. PMID: 35993746; PMCID: PMC9600859.
Cravener MV, Do E, May G, Zarnowski R, Andes DR, McManus CJ, Mitchell AP. Reinforcement amid genetic diversity in the Candida albicans biofilm regulatory network. PLoS Pathog. 2023 Jan 25;19(1):e1011109. doi: 10.1371/journal.ppat.1011109. PMID: 36696432; PMCID: PMC9901766.

## Sheet: 1
assembly 22 name	orf19 ID	Gene name	efg1ΔΔ vs WT		RBT5-UME6 vs WT		efg1ΔΔRBT5-UME6 vs WT		RBT5-UME6 vs efg1ΔΔ		efg1ΔΔRBT5-UME6 vs efg1ΔΔ		efg1ΔΔRBT5-UME6 vs RBT5-UME6
C4_00450C	orf19.5674	PGA10	-4.69364	2.30415e-08	2.12934	0.033775	-3.3543	0.000108649	6.82299	1.05102e-16	1.33934	0.166448	-5.48365	3.06586e-11
C3_07690C	orf19.6718	orf19.6718	0.0377843	0.984609	3.32376	0.0198489	-0.187256	0.93236	3.28597	0.0116696	-0.22504	0.904871	-3.51101	0.00597879
C1_06610C	orf19.6249	HAK1	-0.705786	0.173483	2.18423	2.16089e-07	-1.21231	0.0222482	2.89001	1.03616e-12	-0.506525	0.398758	-3.39654	2.2101e-14
C6_02710C	orf19.5542	SAP6	-12.6711	0	-0.687209	0.0374944	-12.1743	0	11.9839	0	0.496812	0.21631	-11.4871	0
C6_03500C	orf19.5716	SAP4	-12.3294	2.56082e-75	-1.38397	0.0453098	-11.9358	1.08514e-71	10.9454	1.90319e-59	0.393515	0.721377	-10.5519	4.80595e-56
C6_03030W	orf19.5585	SAP5	-11.9092	1.50793e-22	-0.724099	9.22977e-07	-8.70342	9.58065e-60	11.1851	6.06519e-20	3.20578	0.0296591	-7.97932	4.30507e-50
C2_09220W	orf19.4082	DDR48	-8.67432	9.09917e-109	-0.232807	0.726974	-8.55698	4.08484e-103	8.44151	6.22045e-103	0.117339	0.858564	-8.32417	1.82177e-97
C1_07030C	orf19.6202	RBT4	-11.9977	0	-0.504161	0.0080588	-8.19178	0	11.4935	0	3.80588	5.34138e-41	-7.68761	0
C1_02540C	tR(UCU)4	tR(UCU)4	-5.77278	0.0266773	0.445722	NA	-8.07843	0.00323372	6.2185	0.018925	-2.30565	0.49443	-8.52415	0.00151397
C5_02630C	orf19.4279	MNN1	-5.32398	5.8091e-08	0.755501	NA	-7.42241	2.08147e-08	6.07948	4.19227e-10	-2.09843	0.258734	-8.17791	3.88381e-10
C1_01510W	orf19.3337	orf19.3337	-6.14612	8.11928e-27	0.530425	0.379926	-7.17385	2.91059e-20	6.67655	1.66679e-31	-1.02773	0.344301	-7.70428	2.71194e-23
CR_03580C	orf19.4384.1	orf19.4384.1	-3.89477	1.61141e-74	-0.82027	9.4601e-06	-7.12709	2.55987e-39	3.0745	2.57914e-44	-3.23232	2.53424e-08	-6.30682	1.33162e-30
C2_08890W	orf19.217	IRF1	-5.42977	2.31064e-60	0.005355	0.984308	-7.10694	2.55832e-30	5.43513	4.5063e-60	-1.67717	0.0286541	-7.11229	2.9175e-30
C3_01540W	orf19.1691	orf19.1691	-7.80659	9.28415e-26	0.279045	0.835866	-6.81461	1.11776e-20	8.08564	1.5743e-27	0.991985	0.296858	-7.09365	2.25422e-22
CR_02280W	orf19.3740	PGA23	-6.08258	0	-0.899038	9.23001e-18	-5.9451	0	5.18354	0	0.137476	0.409792	-5.04606	0
CR_04440C	orf19.535	RBR1	-8.16641	1.15783e-70	-1.16192	0.00246453	-5.79291	3.94839e-58	7.00449	6.59848e-52	2.37351	3.57221e-06	-4.63098	4.80784e-37
C4_03470C	orf19.3374	ECE1	-13.9203	4.19506e-28	0.526725	0.361408	-5.73152	3.3128e-46	14.447	3.46088e-30	8.1888	2.99056e-10	-6.25825	6.56737e-55
CR_04210C	orf19.508	QDR1	-0.50251	0.122622	1.18991	0.000112969	-1.83308	1.21029e-10	1.69242	1.71769e-09	-1.33057	3.68329e-06	-3.02299	8.64457e-28
C2_03520C	orf19.868	ADAEC	-3.84684	4.60199e-161	0.0280642	0.898802	-5.65457	7.3024e-135	3.8749	1.14889e-161	-1.80773	1.356e-12	-5.68264	1.40113e-135
C1_13450W	orf19.4975	HYR1	-7.2149	0	0.816786	7.4297e-21	-5.39828	0	8.03169	0	1.81663	1.50691e-53	-6.21506	0
C1_12850W	orf19.4914.1	BLP1	-5.89685	1.89967e-91	-0.595666	0.113185	-5.22082	6.00006e-73	5.30119	7.54089e-74	0.676032	0.0490961	-4.62515	3.67132e-57
C2_08300C	orf19.1353	orf19.1353	-6.75377	7.79265e-21	-0.0890414	0.94739	-5.08065	1.7451e-14	6.66473	2.90896e-20	1.67312	0.0502623	-4.99161	4.80552e-14
CR_06650C	orf19.699	orf19.699	0.0966639	0.819231	1.0881	0.000148725	-0.0778271	0.858256	0.991438	0.000192025	-0.174491	0.616134	-1.16593	1.3846e-05
C7_00660W	orf19.7053	GAC1	-6.36975	6.96256e-12	-0.276916	0.634891	-5.03479	3.91416e-13	6.09284	8.49643e-11	1.33496	0.320685	-4.75787	9.75974e-12
C1_06160W	orf19.2429	orf19.2429	-3.61257	0.000175968	-0.998622	NA	-4.89701	0.000295113	2.61395	0.0143576	-1.28444	0.468456	-3.89839	0.00531286
C2_08290C	orf19.1354	UCF1	-7.7699	4.9601e-67	-0.204595	0.811187	-4.87164	6.65231e-28	7.56531	1.52195e-63	2.89826	5.25e-10	-4.66705	1.21393e-25
C3_06470W	orf19.7436	AAF1	-6.0399	1.36274e-05	0.0798902	NA	-4.82441	0.000131712	6.11979	1.30528e-05	1.21549	0.586584	-4.9043	8.62781e-05
C4_05140C	orf19.744	GDB1	-4.62518	5.32795e-107	-0.0667505	0.800718	-4.73022	1.33212e-91	4.55843	9.75762e-103	-0.105033	0.801155	-4.66347	3.594e-88
C5_02080C	orf19.3160	HSP12	-4.12586	6.77159e-12	-0.241436	NA	-4.6957	2.23003e-10	3.88442	2.24113e-10	-0.569837	0.611854	-4.45426	2.24717e-09
CR_07140C	orf19.11	orf19.11	-4.46311	0.000152068	1.07065	NA	-4.68166	0.000587687	5.53376	1.8028e-06	-0.218553	0.929363	-5.75231	1.16771e-05
C5_04930C	orf19.3981	MAL31	-4.91479	9.01733e-61	-0.390066	0.163689	-4.61062	4.90454e-53	4.52473	9.0303e-51	0.304168	0.541984	-4.22056	9.22643e-44
C3_02610C	orf19.251	GLX3	-4.48743	0	-0.0625442	0.619332	-4.44294	0	4.42488	0	0.0444808	0.705623	-4.3804	0
C1_10740C	orf19.2344	ASR1	-3.09852	1.25812e-16	-0.12228	0.86757	-4.43931	6.08195e-31	2.97624	2.37651e-15	-1.34079	0.00125082	-4.31703	3.38132e-29
C3_07280C	orf19.6770	orf19.6770	0.443265	0.130626	0.92361	0.0013079	1.18681	2.77911e-06	0.480345	0.0916984	0.743541	0.00223482	0.263196	0.372151
C3_04000C	orf19.2809	CTN3	-4.91968	4.71169e-45	-0.713817	0.0708425	-4.40414	2.31293e-37	4.20586	1.08341e-32	0.515537	0.278185	-3.69032	4.70964e-26
C5_02110W	orf19.4216	orf19.4216	-3.84018	1.83964e-08	0.247949	NA	-4.3422	1.44056e-07	4.08813	2.256e-09	-0.502023	0.694825	-4.59015	2.03404e-08
C3_03460C	orf19.344	orf19.344	-8.08553	1.86182e-13	-0.105658	0.849254	-4.30727	5.03433e-25	7.97988	4.62752e-13	3.77826	0.00170168	-4.20161	1.35342e-23
CR_10000C	orf19.7576	orf19.7576	-5.01943	3.60788e-06	-4.58457	0.000112835	-4.28177	8.62739e-05	0.434857	0.832534	0.737655	0.614532	0.302798	0.855465
C1_04750W	orf19.769	IFE1	0.467311	0.287791	0.902783	0.0414578	0.903178	0.0221774	0.435472	0.338386	0.435867	0.277069	0.000394875	0.999193
C6_03700W	orf19.5741	ALS1	-3.90475	1.93294e-258	0.642067	2.89135e-11	-4.24253	1.9782e-244	4.54682	0	-0.337776	0.0432735	-4.88459	0
C2_06630C	orf19.36.1	orf19.36.1	-3.85099	4.57135e-86	-1.2698	1.70094e-09	-4.17521	4.16971e-98	2.58119	1.26119e-38	-0.324215	0.185343	-2.90541	2.71741e-47
C2_04810W	orf19.183	HIS3	0.0435295	0.875932	0.861865	1.10391e-06	-0.042089	0.878147	0.818336	7.71302e-07	-0.0856185	0.704779	-0.903954	5.96948e-08
C7_00280W	orf19.7094	HGT12	-6.30565	3.20027e-05	-0.971554	NA	-4.12194	NA	5.33409	0.000893409	2.18371	0.314739	-3.15039	0.038826
C2_08640C	orf19.3612	PST2	-3.00286	7.0863e-106	-0.649338	7.53505e-07	-4.05942	2.25064e-118	2.35352	1.79058e-61	-1.05656	1.65369e-07	-3.41009	1.63577e-80
C5_02600W	orf19.4274	PUT1	-2.13843	4.97911e-13	-0.550264	0.137653	-4.03036	1.64444e-24	1.58816	3.88052e-07	-1.89193	9.24258e-06	-3.4801	5.81469e-18
CR_03270W	orf19.2397	VHT1	-0.111601	0.554868	0.83001	9.32318e-09	-0.371933	0.0194577	0.941611	2.52199e-12	-0.260332	0.103325	-1.20194	2.89958e-18
C4_02930W	orf19.2701	orf19.2701	-5.11351	7.39435e-41	-0.61672	0.0894764	-4.01094	4.89887e-32	4.49679	3.59032e-31	1.10257	0.0223218	-3.39422	1.27087e-22
C1_07160C	orf19.4450.1	orf19.4450.1	-5.05931	1.60072e-06	-0.347301	NA	-3.99211	1.02242e-05	4.71201	1.30303e-05	1.0672	0.490354	-3.64481	6.87855e-05
CR_01470W	orf19.2531	CSP37	-3.28584	2.81343e-136	-0.843239	4.25558e-12	-3.95327	2.00884e-141	2.44261	7.24056e-71	-0.667429	0.000389013	-3.11004	1.27746e-83
C4_03480C	orf19.3375	orf19.3375	-6.14087	7.70876e-06	2.27496	NA	-3.95293	0.00188336	8.41582	2.14014e-10	2.18794	0.27775	-6.22788	1.19572e-07
C2_05180W	orf19.3548.1	WH11	-2.57668	3.80138e-06	0.00180171	NA	-3.90471	1.19107e-07	2.57848	5.8984e-06	-1.32803	0.135904	-3.90651	1.16507e-07
C5_04560C	orf19.3940.1	CUP1	-3.81414	1.37731e-43	-0.44237	0.27	-3.85647	2.31529e-44	3.37177	3.59346e-34	-0.0423258	0.925348	-3.4141	7.90051e-35
C1_10290W	orf19.4899	GCA1	-3.95673	4.15073e-137	-0.352439	0.053067	-3.73986	4.78041e-120	3.6043	2.52609e-112	0.21687	0.334816	-3.38743	3.25762e-97
CR_03450W	orf19.4384	HXT5	-4.36665	2.21631e-16	-0.497809	0.349199	-3.73346	1.30614e-13	3.86884	1.23698e-12	0.633189	0.434331	-3.23565	3.59134e-10
C1_06140C	orf19.2431	orf19.2431	-3.57929	2.82354e-28	0.280082	0.443178	-3.71665	2.7105e-25	3.85937	1.28519e-32	-0.137364	0.823328	-3.99673	4.83446e-29
C2_06930C	orf19.2247	orf19.2247	0.0661242	0.813893	0.771488	5.68345e-05	0.985005	1.0068e-08	0.705364	7.20856e-05	0.91888	2.79183e-08	0.213517	0.288505
C1_04690C	orf19.776	REC8	-2.78135	0.00511111	-0.247529	NA	-3.71423	0.00256587	2.53382	0.0162427	-0.932874	0.56558	-3.4667	0.00516534
C2_04010C	orf19.822	HSP21	-3.71018	1.42653e-16	0.64709	0.307139	-3.70938	3.4524e-16	4.35726	1.39983e-22	0.000795398	1	-4.35647	4.17663e-22
C2_04430W	orf19.4509	orf19.4509	-3.47219	2.7109e-11	-0.316524	NA	-3.66465	3.21029e-10	3.15566	4.07337e-09	-0.19246	0.846858	-3.34812	1.60681e-08
C2_00250W	orf19.2107.1	STF2	-3.39594	2.17252e-19	0.354883	0.560967	-3.58467	4.76342e-21	3.75083	1.79981e-23	-0.188724	0.725867	-3.93955	2.79668e-25
CR_07150W	orf19.734	GLK1	-3.61567	1.05722e-43	0.100135	0.847203	-3.49943	8.9275e-41	3.7158	4.27934e-46	0.116243	0.757312	-3.59956	4.79328e-43
C1_08900W	orf19.4749	orf19.4749	-2.76837	3.89075e-227	-0.0867129	0.51623	-3.45845	0	2.68165	4.32887e-211	-0.690088	7.06325e-12	-3.37174	4.91176e-290
C2_06570C	orf19.33	orf19.33	-3.61891	4.75382e-92	0.0710696	0.813449	-3.35588	4.0912e-78	3.68998	5.71111e-95	0.263035	0.292702	-3.42694	8.02783e-81
C2_03790C	orf19.842	ASR3	-4.10338	0	-0.575762	5.97519e-07	-3.28446	4.55861e-213	3.52762	2.76919e-238	0.81892	5.35269e-13	-2.7087	5.54883e-144
C6_02100W	orf19.3499	orf19.3499	-4.35149	3.19603e-08	-1.11529	NA	-3.2776	2.12733e-06	3.2362	0.00013169	1.07388	0.32545	-2.16231	0.00401356
CR_07490C	orf19.6116	GLK4	-2.06782	1.4916e-16	0.172966	0.696187	-3.21307	1.67222e-36	2.24079	2.98606e-19	-1.14525	2.2243e-05	-3.38604	2.34239e-40
C2_04970W	orf19.3529	ABP2	-0.852486	4.84914e-13	-0.104601	0.588319	-3.17889	9.42778e-98	0.747886	7.87425e-10	-2.3264	2.41899e-51	-3.07428	1.92962e-89
C3_04210W	orf19.5863	orf19.5863	-1.48038	0.0229903	-0.389185	NA	-3.16206	0.000176231	1.09119	0.146919	-1.68168	0.0701989	-2.77287	0.00136065
C3_03980C	orf19.2812	orf19.2812	-3.1239	3.88939e-08	0.359824	NA	-3.13859	3.14971e-07	3.48372	7.8685e-10	-0.0146845	0.989342	-3.49841	7.27892e-09
CR_07890W	orf19.610	EFG1	-12.9132	4.64104e-35	-0.284061	0.0090284	-3.09127	1.94227e-233	12.6292	1.6373e-33	9.82198	1.22761e-20	-2.80721	2.63569e-190
CR_02070C	orf19.2608	ADH5	-3.9349	8.66554e-19	0.162196	0.85134	-3.08287	8.81072e-12	4.0971	2.72404e-20	0.852037	0.095005	-3.24506	4.90245e-13
C3_07730W	orf19.6713	WOR4	-4.77902	0.00295028	-0.416636	NA	-3.01263	NA	4.36239	0.0100564	1.76639	0.408586	-2.596	0.0711226
C4_03500C	orf19.3378	orf19.3378	-3.78034	7.13278e-93	-0.224469	0.369253	-2.96597	8.60488e-62	3.55587	3.11899e-81	0.814372	0.000129544	-2.7415	3.91387e-52
C4_01160W	orf19.4674.1	CRD2	-0.307644	0.365276	0.697752	0.0299674	-1.96215	3.95572e-10	1.0054	0.000302	-1.6545	1.30425e-07	-2.6599	2.41115e-18
C5_02800C	orf19.4305	orf19.4305	-3.01478	5.12144e-07	-0.0831725	NA	-2.91893	4.41417e-06	2.9316	1.96108e-06	0.0958484	0.933885	-2.83575	9.68738e-06
C1_11320C	orf19.670.2	orf19.670.2	-2.80186	7.21754e-19	-0.853291	0.0266709	-2.8859	1.48312e-19	1.94856	2.07873e-09	-0.0840494	0.863786	-2.03261	4.71117e-10
CR_07070C	orf19.1816	ALS3	-6.99743	0	0.476141	4.06213e-11	-2.8811	0	7.47357	0	4.11633	0	-3.35724	0
C3_02250C	orf19.1620	orf19.1620	-3.66109	7.91917e-59	-0.416854	0.0658356	-2.8729	5.99414e-42	3.24423	8.92824e-45	0.788183	0.00549418	-2.45605	1.33524e-29
C2_06590C	orf19.34	GIT1	-2.65939	4.09061e-07	0.550098	NA	-2.87273	7.86174e-07	3.20949	5.47749e-10	-0.213335	0.816679	-3.42283	1.6412e-09
C3_01930W	orf19.1655	PXP2	-2.8335	3.28653e-18	-1.20323	0.00104001	-2.8607	4.54479e-18	1.63027	2.21895e-06	-0.027199	0.959365	-1.65747	1.58291e-06
C7_00350C	orf19.7085	orf19.7085	-1.49005	1.75029e-07	0.472014	0.182208	-2.83791	1.13472e-16	1.96207	2.32719e-12	-1.34785	0.000291456	-3.30992	1.51865e-22
C4_04790W	orf19.3801	FAV1	-7.8958	1.67729e-130	-0.674138	5.8887e-05	-2.81701	6.40845e-74	7.22166	1.07301e-108	5.07879	6.42177e-53	-2.14288	3.8334e-42
C3_00320W	orf19.5437	RHR2	-3.58141	3.70032e-09	-0.356937	NA	-2.81327	8.1841e-07	3.22447	2.93382e-07	0.76814	0.375596	-2.45633	2.83801e-05
C1_04450C	orf19.6837	FMA1	1.90283	0.038258	-0.344585	0.826528	-2.75551	0.00238226	-2.24742	0.0146944	-4.65834	3.22639e-08	-2.41092	0.00805213
C7_02610C	orf19.2371	orf19.2371	-0.786344	1.78311e-17	0.0428877	0.807593	-2.72421	1.03841e-160	0.829232	4.12935e-19	-1.93787	2.20475e-80	-2.7671	5.32715e-164
C2_07630C	orf19.1862	orf19.1862	-3.19249	1.23718e-67	-0.102787	0.742799	-2.69677	1.77355e-49	3.0897	1.04538e-62	0.495716	0.0258114	-2.59398	3.0665e-45
C1_02990C	orf19.2990	XOG1	0.787169	4.47733e-27	-0.433479	4.20437e-07	-2.68744	5.37183e-186	-1.22065	2.12623e-59	-3.47461	0	-2.25397	7.97288e-125
C2_02220C	orf19.1539	orf19.1539	-1.88826	3.80989e-09	-0.335709	0.47268	-2.66974	3.95927e-14	1.55255	3.68983e-06	-0.781485	0.0591343	-2.33403	1.0233e-10
C5_04940W	orf19.3982	orf19.3982	-2.46976	2.48234e-08	-0.412872	0.509256	-2.6659	1.58812e-08	2.05689	9.47877e-06	-0.19614	0.783969	-2.25302	3.42101e-06
C4_05200C	orf19.6859	orf19.6859	-2.70984	5.15058e-10	-0.469041	NA	-2.65581	7.00896e-09	2.2408	1.08599e-06	0.0540277	0.94611	-2.18677	4.39973e-06
C4_06950W	orf19.3114	orf19.3114	0.23917	0.187123	0.635987	0.000193237	0.165576	0.415499	0.396818	0.0173296	-0.0735942	0.720132	-0.470412	0.00387337
C2_01270W	orf19.1996	CHA1	-0.641208	8.40385e-05	1.78453	2.93134e-35	-2.64162	5.61296e-36	2.42573	3.27405e-64	-2.00041	1.35636e-20	-4.42615	3.88546e-106
C6_03090W	orf19.5592	orf19.5592	-6.82741	6.60224e-101	-0.060017	0.805301	-2.6316	5.84878e-76	6.76739	8.97333e-99	4.1958	1.00124e-36	-2.57159	2.58963e-71
C6_00830C	orf19.84	CAN3	-0.0902104	0.467802	0.630984	1.25407e-10	-0.112813	0.355615	0.721195	4.47959e-15	-0.0226029	0.872882	-0.743798	1.39429e-15
C4_06970C	orf19.3112	ZRT101	-2.85354	1.69989e-10	1.21921	0.000835791	-2.59687	1.51588e-08	4.07274	2.56013e-21	0.256665	0.728547	-3.81608	2.79057e-18
C2_07710W	orf19.2211	orf19.2211	-2.47654	8.6146e-07	0.154817	NA	-2.59508	1.91771e-06	2.63136	2.29663e-07	-0.11854	0.898185	-2.7499	3.87619e-07
C2_07280W	orf19.2285	orf19.2285	0.488198	0.0575392	0.620931	0.0295699	-0.115407	0.748873	0.132733	0.716882	-0.603605	0.0147766	-0.736338	0.00348581
C2_06450C	#N/A	#N/A	-3.25644	0.00683157	-1.10065	NA	-2.58153	NA	2.15579	0.130193	0.674906	0.698111	-1.48088	0.280428
C1_08350C	orf19.5114.1	orf19.5114.1	-1.56154	5.52517e-62	0.1065	0.475027	-2.53474	2.26644e-155	1.66804	1.82196e-70	-0.9732	3.60341e-23	-2.64124	4.80977e-168
CR_05340C	orf19.5288	IFE2	-6.54119	1.04808e-06	-0.308381	NA	-2.53356	6.60681e-05	6.23281	4.92518e-06	4.00763	0.00567338	-2.22518	0.000647023
C2_07570W	orf19.1868	RNR22	-1.27809	0.000362241	0.871904	0.0349277	-2.51578	3.3901e-12	2.14999	3.92273e-10	-1.23769	0.00116627	-3.38768	1.0728e-21
C1_06490C	snR189a	snR189a	2.79367	5.49885e-09	1.94434	0.000408657	-2.51492	0.00275035	-0.849331	0.0937412	-5.30859	4.25192e-13	-4.45926	3.42793e-09
CR_02060W	orf19.2607	orf19.2607	-0.00951542	0.966199	0.601085	0.000113766	-0.882547	6.4169e-09	0.610601	2.41995e-05	-0.873032	4.10944e-09	-1.48363	2.91926e-24
CR_09880W	orf19.7561	DEF1	-8.08595	6.96349e-198	0.109467	0.5355	-2.49909	1.69719e-109	8.19542	4.26529e-203	5.58686	6.10102e-93	-2.60856	1.05469e-118
CR_02660C	snR5c	snR5c	0.756112	0.00841587	-0.245186	0.607317	-2.49656	5.65308e-12	-1.0013	0.000696254	-3.25267	6.49683e-21	-2.25137	1.48632e-09
C4_03820C	orf19.5037	HRQ2	-3.49318	2.32997e-21	-0.633816	0.0882516	-2.48519	1.43717e-13	2.85936	8.47914e-14	1.00799	0.0277888	-1.85137	1.66652e-07
C1_02110C	orf19.3668	HGT2	-1.80636	0.014529	-0.0816965	0.951422	-2.48113	0.00061188	1.72466	0.0246691	-0.674774	0.426736	-2.39944	0.000841045
C1_07640C	orf19.2781	orf19.2781	-1.16057	9.72783e-06	-0.935297	0.00188462	-2.46411	1.002e-16	0.225268	0.585872	-1.30355	3.51267e-05	-1.52882	1.98766e-06
C4_04400C	orf19.1409.3	orf19.1409.3	-4.95072	0.00235846	-1.06146	NA	-2.46198	NA	3.88926	0.0301376	2.48874	0.197806	-1.40052	0.35025
C1_06810W	orf19.6229	CAT1	-0.172751	0.341496	0.573887	0.00034629	-0.568718	0.00032807	0.746638	3.00603e-07	-0.395966	0.0132046	-1.1426	8.48406e-15
C1_00880W	orf19.6017	orf19.6017	-0.762513	0.000139764	-0.67764	0.0032633	-2.44613	5.3949e-27	0.0848731	0.811292	-1.68362	5.19624e-13	-1.76849	1.65387e-13
C1_05630C	orf19.2489	orf19.2489	0.0702652	0.518785	0.561282	2.91829e-11	0.289822	0.000729637	0.491017	1.34873e-09	0.219557	0.0106263	-0.271459	0.00143977
C3_01130C	orf19.2515	orf19.2515	-3.39407	7.65107e-40	-0.222504	0.601409	-2.44527	2.53983e-21	3.17157	1.02888e-34	0.948802	0.000679428	-2.22276	9.91585e-18
C1_13240W	orf19.4951	orf19.4951	-0.138398	0.30894	0.560957	1.76705e-06	-0.127538	0.376123	0.699355	1.14696e-10	0.0108594	0.950065	-0.688495	4.41543e-10
C2_06870C	orf19.2241	PST1	-4.82028	0	-0.518491	1.61417e-12	-2.43705	4.86011e-267	4.30179	0	2.38323	3.39966e-184	-1.91856	5.40114e-163
C2_05900W	orf19.5212	orf19.5212	3.11731	0.017879	2.93603	NA	-2.43235	NA	-0.181278	0.921675	-5.54966	0.000314308	-5.36838	0.000730304
CR_02130W	orf19.2613	ECM4	-2.06013	6.52728e-207	-0.0810521	0.421619	-2.42647	9.24704e-264	1.97908	4.01274e-188	-0.366339	2.19666e-06	-2.34542	5.67231e-243
CR_09780C	orf19.7550	IFA14	-4.60995	0.0140743	-0.503597	NA	-2.41442	NA	4.10636	0.0442218	2.19554	0.364498	-1.91082	0.357599
C4_06980W	orf19.3111	PRA1	-2.81122	1.68472e-40	0.98578	1.03793e-06	-2.39508	5.43984e-30	3.797	1.21412e-74	0.416139	0.129161	-3.38086	3.2861e-60
C1_06450C	orf19.6265.1	RPS14B	-2.29052	0.0243251	-2.65131	0.0170676	-2.38619	0.0210535	-0.360798	0.827902	-0.0956744	0.946717	0.265123	0.844126
CR_09700W	orf19.6592	orf19.6592	-3.07123	0.0291444	-0.118526	NA	-2.36877	NA	2.9527	0.0473203	0.702456	0.722704	-2.25024	0.1115
C4_02410C	orf19.2762	AHP1	-1.31561	0.0418974	0.266131	0.805301	-2.33743	0.000216406	1.58174	0.014285	-1.02182	0.141106	-2.60356	2.59525e-05
C4_06390W	orf19.2896	SOU1	-0.718912	3.16764e-07	-0.339255	0.0538336	-2.31257	2.85769e-47	0.379658	0.018027	-1.59366	2.30309e-22	-1.97331	6.92893e-33
CR_06040W	orf19.3854	orf19.3854	-0.0603241	0.58602	0.545991	7.61273e-11	1.49038	4.9561e-87	0.606315	1.51097e-14	1.55071	1.20251e-95	0.944392	1.31242e-35
C6_02450W	orf19.5514	orf19.5514	-1.76344	5.388e-12	-0.0575941	0.908218	-2.30609	7.52521e-18	1.70584	4.94553e-11	-0.542652	0.0858791	-2.2485	8.39773e-17
C1_11530C	orf19.1167	orf19.1167	-1.78621	0.023203	-0.315498	0.813514	-2.30105	0.00370696	1.47071	0.0844009	-0.514837	0.59744	-1.98555	0.0131868
C1_02120C	orf19.3669	SHA3	-2.42928	5.60919e-09	0.788059	0.0628428	-2.29783	1.24525e-07	3.21734	2.05342e-15	0.131452	0.854518	-3.08589	1.76618e-13
CR_07280W	orf19.6140	FRE30	-3.14038	1.11793e-11	0.746257	0.247273	-2.2743	1.80681e-06	3.88663	2.039e-17	0.866081	0.0992618	-3.02055	7.14392e-11
C2_00860C	orf19.2038	orf19.2038	-2.7219	2.33556e-10	-0.164824	0.808941	-2.26687	1.3584e-07	2.55707	6.67917e-09	0.455028	0.456558	-2.10204	1.57206e-06
C5_03310C	orf19.2649	PCL1	-1.4929	2.02811e-31	-0.935614	1.12443e-11	-2.2551	6.05272e-65	0.557291	7.7331e-05	-0.762194	5.99807e-08	-1.31948	1.17554e-21
C6_01060C	orf19.111	CAN2	-1.6676	0.0390158	-0.789674	NA	-2.21954	0.0132529	0.877929	0.411906	-0.551942	0.629865	-1.42987	0.154133
C1_02150W	orf19.3672	GAL10	-0.84075	0.000146019	0.0890515	0.824156	-2.20795	8.54143e-23	0.929802	3.0415e-05	-1.3672	3.01372e-09	-2.297	2.04282e-24
CR_06670W	orf19.701	CFL11	-8.26791	1.23254e-10	0.275889	NA	-2.19739	1.68898e-06	8.5438	3.20314e-11	6.07052	4.88159e-06	-2.47328	4.62339e-08
C5_02380W	orf19.4246	SRG1	-1.23857	1.68863e-76	-0.385211	2.18149e-07	-2.17544	1.91459e-229	0.853364	2.16519e-36	-0.936866	1.03986e-42	-1.79023	2.39716e-154
C1_04590W	orf19.6852.1	orf19.6852.1	-0.888278	0.0257301	0.0866082	0.904366	-2.11687	8.39101e-09	0.974886	0.0157876	-1.22859	0.0011504	-2.20348	1.5066e-09
C3_06450W	orf19.7434	GLG2	-3.1883	6.60287e-06	-0.28389	NA	-2.11387	0.00121698	2.90441	8.35327e-05	1.07444	0.238144	-1.82998	0.0067081
C2_06680W	orf19.1224	FRP3	-2.36854	1.4744e-95	-0.606265	1.25582e-06	-2.0964	1.35063e-74	1.76228	3.67103e-52	0.272139	0.043325	-1.49014	3.26237e-37
C1_02700C	orf19.2959.1	orf19.2959.1	-3.60594	3.26255e-271	-0.319348	0.00466141	-2.09359	7.21039e-104	3.28659	1.81137e-222	1.51235	6.089e-45	-1.77424	1.43563e-73
C1_00220W	orf19.6081	PHR2	-4.66628	7.60029e-06	0.108	NA	-2.06427	0.00378022	4.77428	5.93928e-06	2.60201	0.0257362	-2.17227	0.0020433
CR_04970C	orf19.634	orf19.634	-0.840942	0.0477259	-0.0168215	NA	-2.0447	1.11853e-05	0.824121	0.0696039	-1.20376	0.0148882	-2.02788	1.58567e-05
C6_03850C	orf19.5760	IHD1	-6.83733	0	0.151912	0.19819	-2.03327	4.42016e-132	6.98924	0	4.80407	0	-2.18518	2.62138e-152
CR_09930W	orf19.7567	orf19.7567	-3.05423	2.49302e-09	-0.638934	NA	-2.02636	2.68011e-05	2.4153	9.30217e-06	1.02787	0.104833	-1.38743	0.00757661
C6_00810C	orf19.3643	orf19.3643	-2.86609	0.0106196	1.09927	NA	-2.0258	0.0644162	3.96536	0.000218374	0.840285	0.582572	-3.12508	0.00153199
CR_00200W	orf19.7514	PCK1	-3.37829	6.07187e-26	-0.0218333	0.969278	-2.0167	2.07876e-11	3.35646	2.65655e-25	1.36159	0.000134932	-1.99487	4.17774e-11
C1_10000C	orf19.4866	CPP1	-2.01662	1.31581e-91	-0.484423	1.21554e-05	-2.01269	1.11251e-89	1.5322	2.48254e-52	0.0039347	0.981481	-1.52827	4.18314e-51
C6_01290C	orf19.136	QDR3	-0.128915	0.622068	0.510028	0.0233466	-1.34276	4.37098e-10	0.638943	0.00113488	-1.21385	1.05748e-08	-1.85279	8.35954e-19
C3_00920W	orf19.6169	ATO1	-5.84941	3.58304e-166	-0.320462	0.260528	-2.0065	1.00775e-23	5.52895	3.86164e-148	3.84292	3.86036e-71	-1.68603	5.85652e-17
C2_01300C	orf19.1995	MNN24	-2.81676	5.5808e-218	0.0700206	0.63208	-1.98659	5.28846e-114	2.88678	1.95708e-227	0.830169	4.13027e-18	-2.05661	2.80952e-121
C3_03490W	orf19.347	RSN1	-5.99351	8.1292e-05	-0.473184	NA	-1.97294	NA	5.52033	0.000479509	4.02057	0.0158756	-1.49976	0.213061
C3_02480C	orf19.238	CCP1	-0.696685	0.00120887	0.788776	0.000429352	-1.96807	3.85671e-19	1.48546	1.5522e-13	-1.27139	1.77389e-08	-2.75685	1.84197e-37
C4_06540W	orf19.2881	MNN4	-1.95846	2.00963e-98	-0.09419	0.506215	-1.96785	6.97239e-94	1.86427	6.49414e-87	-0.00939741	0.95498	-1.87366	5.02709e-83
CR_08800W	ITS2	ITS2	1.11555	0.0225992	1.05314	NA	-1.96275	0.00369816	-0.0624078	0.945085	-3.0783	3.1781e-07	-3.01589	1.14505e-06
CR_04820W	orf19.6311	orf19.6311	-2.41078	0.0100472	1.31024	0.249233	-1.95586	0.0462571	3.72103	3.19148e-05	0.454921	0.71207	-3.2661	0.000248868
CR_07290W	orf19.6139	FRE7	-3.48218	4.97246e-11	0.732435	0.34392	-1.93953	0.000567852	4.21462	1.00336e-15	1.54265	0.00618743	-2.67197	7.35236e-07
C1_01740W	orf19.4551	CTN1	-1.56469	0.000803637	-0.28152	0.721618	-1.9332	3.61842e-05	1.28317	0.00913003	-0.368508	0.525669	-1.65168	0.00047206
C4_05130C	orf19.742	ALD6	-2.48588	2.64935e-18	-0.435877	0.244167	-1.93118	1.19811e-11	2.05	3.10556e-12	0.554697	0.114127	-1.49531	3.8518e-07
C1_01930W	orf19.4530.1	orf19.4530.1	-1.79979	1.85043e-26	-0.0129204	0.969278	-1.87663	1.96517e-27	1.78687	1.04045e-25	-0.0768389	0.764502	-1.86371	1.0777e-26
C3_01180C	orf19.3156	orf19.3156	-1.66533	4.81276e-87	-0.350626	0.000239745	-1.87345	1.29091e-104	1.31471	5.45403e-53	-0.208113	0.0401351	-1.52282	1.90683e-67
C4_03300C	orf19.1440.2	orf19.1440.2	-1.41286	5.19516e-17	-0.102605	0.727455	-1.85665	2.52157e-25	1.31026	2.98299e-14	-0.443781	0.0325103	-1.75404	4.74627e-22
C1_04900W	orf19.753	MNN15	-1.97974	4.38984e-82	-0.0907724	0.572667	-1.84109	1.33322e-68	1.88897	1.20555e-72	0.138651	0.330854	-1.75032	2.80622e-60
CR_04680C	orf19.1736	orf19.1736	-4.72746	4.02344e-26	-0.192522	0.683935	-1.83732	8.67811e-10	4.53494	1.01323e-23	2.89014	1.27973e-09	-1.6448	7.78821e-08
C3_07340W	orf19.6757	GCY1	-2.3331	0.0224666	-0.616439	NA	-1.83613	0.0845895	1.71666	0.145619	0.496968	0.724059	-1.21969	0.296059
C2_07900W	orf19.2192	GDH2	-1.82936	8.51411e-59	-0.119197	0.516295	-1.83474	1.2216e-58	1.71016	2.76314e-51	-0.00538835	0.977818	-1.71555	4.27903e-51
C1_09560C	snR31a	snR31a	2.67164	1.32521e-17	1.67227	3.98118e-06	-1.82773	0.000555107	-0.999368	0.000608044	-4.49937	1.41334e-23	-3.50001	9.05853e-14
C5_04380C	orf19.3924	orf19.3924	-1.70199	0.00309999	-1.16918	NA	-1.80945	0.00252516	0.532805	0.524236	-0.107462	0.9056	-0.640267	0.385067
C2_07730W	orf19.2209	YVC1	-1.45973	3.13186e-115	-0.149577	0.0733091	-1.8053	2.48256e-171	1.31015	4.14511e-92	-0.345569	5.37076e-07	-1.65572	7.2967e-143
C2_10340W	orf19.1744	HEM4	-0.0338186	0.880042	0.490864	0.00118951	-0.113959	0.538142	0.524683	0.000154981	-0.0801407	0.652897	-0.604824	1.29527e-05
C4_02360W	orf19.2768	AMS1	-2.96469	4.04731e-38	-0.282182	0.348211	-1.78761	1.55338e-16	2.68251	1.97889e-30	1.17709	3.90395e-06	-1.50543	1.1926e-11
C1_10300W	orf19.4900	MNN12	-4.27868	1.47086e-219	-0.339472	0.0107601	-1.78011	3.39771e-56	3.93921	3.87e-183	2.49857	1.40791e-70	-1.44064	4.4915e-36
C6_02620C	orf19.5532	orf19.5532	-2.24533	1.87391e-09	-0.486701	0.314952	-1.77833	2.30916e-06	1.75862	1.0462e-05	0.466995	0.353309	-1.29163	0.00128339
C5_01240W	orf19.1945	AUR1	0.030395	0.877871	0.484573	0.000223878	0.0350347	0.853914	0.454178	0.000233413	0.00463966	0.980575	-0.449539	0.000262101
C2_08430C	orf19.3638	PGA46	-2.61943	2.34278e-07	-0.0539808	NA	-1.7738	0.00032907	2.56544	7.79116e-07	0.845629	0.184757	-1.71982	0.000552318
C1_11670W	orf19.1152	orf19.1152	-1.4364	4.34117e-08	-0.121581	0.795503	-1.77362	2.06195e-10	1.31482	1.40704e-06	-0.337216	0.343306	-1.65204	6.52706e-09
C6_02760W	orf19.5549	orf19.5549	-0.847698	0.030873	-0.587775	0.245704	-1.77062	8.52249e-06	0.259923	0.65393	-0.922925	0.0300293	-1.18285	0.00553639
CR_06510W	orf19.715	orf19.715	-2.08088	1.31307e-58	-0.112714	0.58337	-1.75918	6.12757e-42	1.96816	1.88501e-51	0.321698	0.0379379	-1.64646	4.82282e-36
CR_04480C	orf19.539	LAP3	-2.46517	5.29705e-164	-0.50149	1.24174e-07	-1.7515	7.91551e-87	1.96368	1.34052e-100	0.713672	3.40784e-13	-1.25001	7.12645e-43
CR_04800W	orf19.6313	MNT4	-1.52491	3.91774e-09	-0.133278	0.762875	-1.73503	3.3827e-10	1.39164	2.52561e-07	-0.210117	0.584008	-1.60175	1.57658e-08
C3_06860C	orf19.6816	orf19.6816	-4.08239	0.00318823	0.273675	NA	-1.73032	0.100304	4.35606	0.00187511	2.35206	0.135171	-2.004	0.0470528
C4_00490W	orf19.5678	orf19.5678	0.29443	0.0744433	0.474777	0.00604618	0.0102511	0.969827	0.180347	0.350381	-0.284178	0.0807325	-0.464526	0.00324907
CR_06500C	orf19.716	orf19.716	-2.19512	1.36999e-107	-0.527617	1.25582e-06	-1.70217	1.60548e-65	1.66751	6.45647e-61	0.492957	5.56948e-06	-1.17455	1.02869e-30
C7_00930W	orf19.7021	GPH1	-2.298	3.32567e-24	-0.14788	0.694098	-1.69746	5.41306e-14	2.15012	9.42426e-21	0.600548	0.0247553	-1.54958	1.39722e-11
C2_00600C	orf19.2067	orf19.2067	-0.12488	0.534445	0.471273	0.00677966	-0.181643	0.34935	0.596152	0.000109245	-0.0567638	0.786863	-0.652916	2.50082e-05
C2_09940W	orf19.1358	GCN4	0.0974053	0.149154	0.46433	3.75461e-15	-0.157064	0.0139726	0.366925	1.80756e-10	-0.25447	1.38806e-05	-0.621395	3.20538e-28
CR_05170C	orf19.638	FDH1	-1.86317	2.45589e-05	-1.58789	0.00110611	-1.6845	0.000197318	0.27528	0.690848	0.178674	0.766734	-0.0966057	0.88253
CR_07790C	orf19.3707	YHB1	-2.17106	2.49887e-05	1.06513	0.0915924	-1.67402	0.00181635	3.23619	1.07185e-10	0.497044	0.428971	-2.73915	5.71877e-08
C5_05050W	orf19.3997	ADH1	-2.0072	1.99029e-27	0.191421	0.523033	-1.66485	5.55233e-19	2.19862	1.01279e-32	0.342353	0.110455	-1.85627	1.98315e-23
C4_06960W	orf19.3113	orf19.3113	0.176729	0.116326	0.459496	2.00685e-05	0.350436	0.000739343	0.282767	0.00753422	0.173706	0.106168	-0.109061	0.370332
C4_05770C	orf19.1263	CFL1	0.893222	2.10867e-24	-0.987003	2.1992e-26	-1.65477	1.52055e-75	-1.88023	5.99485e-101	-2.54799	1.50441e-181	-0.667767	2.0453e-12
CR_05330W	orf19.5288.1	orf19.5288.1	-1.49585	9.82507e-60	-0.119995	0.385222	-1.64262	2.24996e-69	1.37585	7.54961e-50	-0.146771	0.203757	-1.52262	1.07878e-58
C1_06300W	snR5b	snR5b	1.95915	0.000877502	1.03873	NA	-1.64241	0.0720485	-0.920419	0.150801	-3.60156	1.28307e-06	-2.68114	0.000874468
C3_01820W	orf19.1664	orf19.1664	-1.50042	8.52926e-44	-0.173745	0.251067	-1.638	4.55248e-49	1.32667	2.46792e-33	-0.137583	0.343843	-1.46425	3.93237e-38
C2_04890C	tD(GUC)5	tD(GUC)5	-3.15664	0.0285869	0.391561	NA	-1.61601	NA	3.5482	0.01474	1.54064	0.36594	-2.00757	0.123955
C2_10180W	orf19.1763	IFR1	-1.44733	6.3079e-15	-0.243208	0.362585	-1.61579	5.84439e-17	1.20412	4.3146e-10	-0.16846	0.520377	-1.37258	5.03096e-12
C1_07130C	orf19.4455	orf19.4455	0.310482	0.0736778	0.45517	0.0156783	-0.385212	0.0372599	0.144688	0.5127	-0.695693	1.55581e-05	-0.840381	3.55989e-07
C2_08050C	orf19.2179	SIT1	-2.19465	1.19085e-21	0.261256	0.391817	-1.59381	2.38935e-12	2.45591	1.04722e-26	0.600842	0.0299906	-1.85506	2.10904e-16
CR_08100C	orf19.6369	RIO2	0.195517	0.102306	0.454279	0.00010056	-0.247786	0.0438726	0.258762	0.0265318	-0.443303	4.02162e-05	-0.702065	7.01106e-11
C2_06970W	orf19.2251	AAH1	0.170376	0.471253	0.454046	0.0422713	0.207273	0.375057	0.283671	0.198574	0.0368971	0.891134	-0.246774	0.257311
C5_04880C	orf19.3974	PUT2	-0.56535	4.69593e-06	-0.364874	0.0122198	-1.58063	1.53797e-37	0.200477	0.188841	-1.01528	6.62688e-16	-1.21575	9.09628e-22
C3_00360W	orf19.5431	orf19.5431	-4.32053	0.000754104	0.614317	NA	-1.57988	0.0724121	4.93485	0.000111388	2.74065	0.0522674	-2.1942	0.00681248
C2_01330C	orf19.1992	SIR2	-2.33571	1.0445e-137	-0.168735	0.177501	-1.57478	2.97433e-65	2.16697	1.09882e-116	0.760928	2.38286e-14	-1.40604	3.41013e-51
C2_09890W	orf19.1362	SMM1	0.224658	0.258493	0.45133	0.0256643	-0.149823	0.514683	0.226672	0.275331	-0.374482	0.0371061	-0.601154	0.000685129
C7_03280C	orf19.5125	orf19.5125	-1.5292	1.87312e-18	-0.791317	4.36493e-05	-1.5747	1.10548e-18	0.737878	0.000128296	-0.0455072	0.871001	-0.783385	5.10079e-05
CR_06340C	orf19.3888	PGI1	-0.979146	3.38304e-22	0.0265876	0.894414	-1.57382	1.98148e-55	1.00573	2.64631e-23	-0.594673	1.11829e-08	-1.60041	4.67998e-57
C1_10450W	orf19.986	GLY1	-0.338151	4.76379e-05	0.459597	8.77812e-08	-1.57208	8.03307e-87	0.797749	4.34711e-24	-1.23393	1.00434e-53	-2.03168	8.00785e-145
C2_01000W	orf19.2023	HGT7	-0.750485	2.27635e-16	0.279862	0.0108689	-1.56642	1.39917e-68	1.03035	3.89935e-30	-0.815935	3.07889e-19	-1.84628	5.74317e-95
C3_05790C	orf19.7360	orf19.7360	-2.34299	0.0440323	-1.87544	NA	-1.56573	0.216699	0.467548	0.802701	0.777258	0.571155	0.30971	0.841133
C6_02890C	orf19.5565	HPD1	-1.61542	8.55743e-06	-0.41665	0.425511	-1.56163	2.91771e-05	1.19877	0.0020163	0.0537897	0.927679	-1.14498	0.00333487
C4_01250W	orf19.4664	NAT4	-1.38065	1.37731e-43	0.083736	0.602971	-1.5491	6.71219e-50	1.46438	8.13538e-48	-0.168454	0.20371	-1.63284	4.01726e-54
C1_11660W	orf19.1153	GAD1	-1.9319	8.03992e-75	-0.0502604	0.805657	-1.5476	3.70023e-48	1.88164	1.01637e-70	0.384301	0.00084056	-1.49734	7.01464e-45
C1_11720W	orf19.1146	orf19.1146	-0.202377	0.289657	0.445515	0.0158466	0.303399	0.0892734	0.647892	5.26151e-05	0.505776	0.00145895	-0.142116	0.47049
CR_01920W	orf19.2591	BIO3	-2.38179	0.00793848	-0.100202	NA	-1.54488	0.0964996	2.28159	0.015449	0.836909	0.4531	-1.44468	0.122371
C1_09690W	orf19.4833	MLS1	-1.48167	7.95303e-09	-0.761951	0.0121447	-1.51836	4.56335e-09	0.719721	0.0112605	-0.0366872	0.928646	-0.756408	0.00623596
C3_06000W	orf19.7381	AHR1	-1.09077	0.00793848	-0.0852946	NA	-1.51803	0.000514039	1.00548	0.0224493	-0.427254	0.423733	-1.43273	0.00128386
C5_02460C	orf19.4255	ECM331	-3.2333	4.61307e-288	-0.134726	0.283664	-1.51078	1.63462e-68	3.09858	9.13408e-263	1.72252	1.42349e-79	-1.37606	2.10166e-56
C6_01400W	orf19.3444	orf19.3444	-1.10803	0.0242145	0.600227	NA	-1.50893	0.00386085	1.70825	0.000253261	-0.4009	0.536545	-2.10915	1.80795e-05
C1_13140C	orf19.4941	TYE7	-0.592858	0.0428836	1.0787	0.000195984	-1.50712	2.44562e-08	1.67156	1.85514e-10	-0.914261	0.000986808	-2.58582	3.2218e-23
C5_03430W	orf19.2638	orf19.2638	-2.2639	3.70196e-42	-0.621819	0.000427857	-1.4931	2.80148e-20	1.64208	6.60017e-21	0.770805	4.24783e-05	-0.871278	5.67907e-07
C1_04500W	orf19.6844	ICL1	-1.63617	6.89618e-07	-0.414495	0.387714	-1.49173	8.92854e-06	1.22168	0.000377249	0.144448	0.748143	-1.07723	0.00176802
CR_06550C	orf19.711	orf19.711	-0.587106	0.0441755	0.994243	0.000505598	-1.48806	1.54272e-07	1.58135	1.00628e-09	-0.900957	0.00215122	-2.48231	4.06438e-20
C2_04440W	orf19.4508	orf19.4508	-1.99514	2.03319e-35	-0.250623	0.240912	-1.4848	1.85459e-20	1.74451	4.35268e-26	0.510336	0.00677697	-1.23418	7.87931e-14
CR_04510W	orf19.542	HXK2	-1.35126	7.21521e-39	0.132343	0.405722	-1.47657	4.38823e-46	1.4836	1.12991e-46	-0.125316	0.3334	-1.60891	1.63219e-54
C4_01380W	orf19.4649	ZCF27	-1.01563	2.58299e-13	-0.0326622	0.905212	-1.47276	4.22454e-24	0.982966	4.24254e-12	-0.45713	0.00455581	-1.4401	1.88502e-22
CR_03370C	orf19.2385	KTI12	0.177273	0.0601815	0.435143	1.9061e-06	-0.190694	0.0523462	0.257871	0.00449214	-0.367967	1.93049e-05	-0.625838	2.05078e-13
C6_02010C	orf19.691	GPD2	-0.404613	1.93045e-05	-0.175008	0.155316	-1.45962	3.0994e-58	0.229604	0.0285565	-1.055	8.44222e-31	-1.28461	9.62565e-45
C5_03750W	orf19.1120	FAV2	-6.2713	0	-0.464647	4.58531e-06	-1.45421	2.63743e-56	5.80665	0	4.81709	2.07882e-231	-0.989567	8.09845e-26
C1_02040C	orf19.3661	orf19.3661	-0.793759	1.2461e-14	-0.297696	0.0179617	-1.45418	1.34929e-42	0.496063	6.21365e-06	-0.66042	2.67021e-09	-1.15648	4.62231e-26
CR_03890W	orf19.467	WOR3	-3.40562	0	0.0870959	0.466491	-1.44178	2.00856e-77	3.49271	0	1.96383	2.23313e-111	-1.52888	3.14503e-86
C3_05550C	orf19.6990	orf19.6990	-1.72732	9.79899e-05	-0.542316	NA	-1.43808	0.00184001	1.18501	0.0185215	0.289248	0.642477	-0.895761	0.0816214
C1_11990W	orf19.5267	CWP419	3.21771	7.36159e-09	0.82128	NA	-1.42191	0.131301	-2.39643	9.14644e-06	-4.63962	7.99038e-11	-2.24319	0.00681756
C2_02390W	orf19.1562	orf19.1562	-1.30612	2.37922e-53	0.153536	0.180587	-1.40929	1.28657e-58	1.45965	1.25933e-65	-0.103172	0.369286	-1.56282	5.09485e-71
C5_04830W	orf19.3969	SFL2	-0.61788	1.68465e-09	0.246221	0.0510477	-1.4071	6.40249e-40	0.864101	1.31788e-17	-0.789218	6.03463e-13	-1.65332	2.05351e-54
CR_02470W	snR33a	snR33a	-1.00894	3.88963e-25	-0.091774	0.566526	-1.38541	2.73546e-44	0.917169	1.69455e-20	-0.376467	0.000462772	-1.29364	6.15217e-38
C2_08400C	orf19.1433.1	orf19.1433.1	-2.10555	0.0452927	-0.121747	NA	-1.382	NA	1.9838	0.0798288	0.723545	0.587414	-1.26026	0.257928
C4_05300W	orf19.1290	XKS1	-0.965282	4.2008e-27	-0.06885	0.659036	-1.38178	8.74387e-51	0.896432	6.75217e-23	-0.416501	2.63135e-05	-1.31293	8.94415e-45
C6_00860W	orf19.87	GPX1	-1.44147	2.57613e-30	-0.60674	1.23213e-05	-1.37951	1.522e-26	0.834729	8.96208e-10	0.0619618	0.748041	-0.772767	3.07724e-08
C5_02520W	orf19.4264	orf19.4264	-1.3249	9.34602e-27	-0.618354	6.19278e-06	-1.37825	5.10205e-27	0.706541	2.00645e-07	-0.0533504	0.782851	-0.759892	4.22956e-08
C7_02060W	orf19.6511	LIG1	0.0092053	0.944709	0.419656	1.21522e-06	0.563447	8.23196e-13	0.410451	4.07098e-07	0.554241	6.4676e-13	0.143791	0.113669
C1_13070C	orf19.4933	FAD3	0.0528331	0.761464	0.419317	0.00122483	0.0701797	0.67334	0.366484	0.00278309	0.0173466	0.923123	-0.349138	0.00436407
C2_10350C	orf19.1743	ACS1	-1.5347	9.87414e-52	-0.306015	0.0143902	-1.37661	1.53941e-41	1.22868	3.12113e-33	0.158086	0.198733	-1.0706	3.05605e-25
C1_04870W	orf19.756	SAP7	-1.79128	0.000536826	-0.753072	0.281259	-1.35877	0.0127195	1.03821	0.0769638	0.432512	0.494668	-0.6057	0.325276
C4_00960W	orf19.4698	PTC8	-1.04368	0.00114594	0.77822	0.0233673	-1.35303	6.92115e-05	1.8219	1.46969e-09	-0.309348	0.468456	-2.13125	2.54913e-11
C1_12360C	orf19.5228	RIB3	-0.807065	1.05673e-16	-0.325462	0.00465442	-1.3298	9.97712e-42	0.481603	2.87554e-06	-0.522735	3.89891e-07	-1.00434	2.00135e-23
C2_08130W	orf19.2172	ARA1	-0.624808	1.5532e-05	-0.657297	5.08516e-05	-1.32609	1.13638e-18	-0.0324884	0.91418	-0.701284	7.88977e-06	-0.668796	5.86921e-05
C2_07720C	orf19.2210	orf19.2210	-2.90978	0	0.187701	0.0458298	-1.325	1.1526e-70	3.09748	0	1.58477	2.18903e-89	-1.5127	1.47118e-91
C1_02980W	orf19.2989	GOR1	-0.417618	0.00434006	-0.0719696	0.780041	-1.32328	1.6163e-19	0.345649	0.0293459	-0.905664	1.16919e-09	-1.25131	5.4497e-17
C6_01490C	orf19.3435	orf19.3435	-1.21816	0.0266773	-0.869969	NA	-1.32291	0.0226919	0.34819	0.686483	-0.104747	0.901219	-0.452937	0.538115
C1_13160W	orf19.4943	PSA2	-2.69877	1.0141e-10	0.381022	0.437878	-1.32153	0.000554616	3.0798	1.14662e-13	1.37724	0.00343514	-1.70256	3.90496e-06
C1_04580C	orf19.6852	orf19.6852	-0.616152	0.00158193	-0.138971	0.666149	-1.31664	5.93468e-11	0.477181	0.0262943	-0.700484	0.000919107	-1.17767	1.28033e-08
CR_07620W	orf19.6287	AAT21	-0.257224	0.0205336	-0.209467	0.125594	-1.30111	1.62922e-33	0.0477565	0.790909	-1.04388	4.8405e-22	-1.09164	1.1971e-22
C6_01360W	orf19.3448	orf19.3448	0.221908	0.0555371	0.407548	0.00051709	0.558914	9.86037e-08	0.18564	0.136784	0.337007	0.00137856	0.151366	0.218652
C5_04510W	orf19.3936	GDE1	-0.201753	0.120501	0.407483	0.00134031	0.713036	5.68386e-11	0.609236	7.55289e-08	0.914789	5.5532e-18	0.305553	0.00891607
C5_02930C	orf19.4317	GRE3	-1.08526	8.96178e-26	-0.353939	0.00370617	-1.30076	8.15573e-35	0.73132	1.28069e-11	-0.215502	0.083072	-0.946822	4.48104e-18
CR_02360W	orf19.3733	IDP2	-1.25018	3.64761e-22	-0.229515	0.198911	-1.29711	3.11703e-23	1.02066	9.10059e-15	-0.0469359	0.804966	-1.0676	8.95721e-16
C3_02750W	orf19.265	orf19.265	-2.43473	0.00113063	0.486505	NA	-1.2876	0.0849664	2.92124	7.96242e-05	1.14713	0.19509	-1.77411	0.0102424
C1_09160W	orf19.4774	AOX1	-1.74181	6.08213e-26	0.0849941	0.762339	-1.28438	9.62382e-15	1.8268	9.63862e-28	0.45743	0.0208379	-1.36937	2.61136e-16
C1_03150C	orf19.3007.2	orf19.3007.2	-0.696211	2.30115e-12	-0.223835	0.0803888	-1.27749	1.60884e-35	0.472376	7.93174e-06	-0.58128	6.47092e-08	-1.05366	2.68475e-23
C3_00220W	orf19.5447	HGT19	-2.75182	0.00131416	-0.752661	NA	-1.27644	0.130179	1.99916	0.0397069	1.47538	0.132365	-0.523781	0.60531
CR_04590C	orf19.550	PDX3	-0.552781	5.2822e-09	0.195458	0.10862	-1.27492	8.53242e-43	0.748239	1.05862e-15	-0.722135	2.67631e-14	-1.47037	1.78969e-56
C6_03340C	orf19.5622	GLC3	-0.832084	3.2592e-17	-0.220191	0.0841095	-1.25531	1.09077e-36	0.611893	1.81278e-09	-0.423224	5.84033e-05	-1.03512	1.18167e-24
C6_02670C	orf19.5537	WSC2	-2.50421	7.82247e-225	-0.397497	1.4756e-06	-1.25439	2.64582e-62	2.10672	9.5214e-155	1.24983	3.30671e-53	-0.856888	1.92824e-28
CR_09440C	orf19.7341	orf19.7341	-1.88079	1.58208e-05	0.160975	0.828213	-1.25434	0.00535005	2.04176	3.42736e-06	0.626447	0.236517	-1.41531	0.00131597
CR_02490W	orf19.176	OPT4	-2.61735	1.41943e-20	-0.452489	0.250655	-1.25355	1.95554e-05	2.16486	3.57163e-14	1.3638	3.23988e-06	-0.801059	0.00904594
C4_01750C	orf19.4618	FBA1	-0.867313	2.14231e-17	0.159548	0.277899	-1.25231	2.72722e-35	1.02686	4.59493e-24	-0.384994	0.000328562	-1.41185	1.27723e-44
C2_10070W	orf19.1774	orf19.1774	-0.808826	0.0496962	-0.202267	0.764955	-1.24726	0.00310961	0.606559	0.198574	-0.438435	0.371654	-1.04499	0.0171419
C2_09820W	orf19.1368	orf19.1368	0.858342	0.0010495	1.22957	5.22241e-06	-1.24384	2.46293e-06	0.371227	0.236338	-2.10218	4.52125e-17	-2.47341	4.92826e-23
C1_09210C	orf19.4779	orf19.4779	-1.12364	5.27162e-15	0.600647	0.000136116	-1.23958	1.70665e-17	1.72429	1.74798e-34	-0.115945	0.548114	-1.84023	5.67383e-38
C7_03030W	orf19.5158	orf19.5158	-0.392758	0.000538369	-0.15776	0.329323	-1.23898	6.32066e-27	0.234998	0.0728139	-0.846221	4.90528e-13	-1.08122	9.50835e-20
C1_06550W	orf19.6257	GLT1	-0.085963	0.535015	0.397203	0.000529301	-0.735657	1.41292e-12	0.483166	4.16143e-06	-0.649694	3.12224e-10	-1.13286	7.46552e-29
C4_04860W	orf19.3793	orf19.3793	-1.1013	2.48522e-26	0.518073	2.97085e-06	-1.23787	2.15952e-31	1.61938	1.56143e-56	-0.136568	0.309907	-1.75594	5.68121e-63
C3_00480C	orf19.5417	DOT5	-0.89554	0.000707729	-0.357768	0.335199	-1.23643	7.66278e-06	0.537772	0.0838308	-0.340893	0.302517	-0.878665	0.0030009
CR_10340W	orf19.7610	PTP3	-2.57469	2.30084e-63	0.404182	0.014662	-1.23479	1.43469e-17	2.97887	1.02181e-84	1.3399	1.9716e-16	-1.63897	1.83086e-30
C1_08500C	orf19.395	ENO1	-1.08351	2.23938e-13	0.0953904	0.719871	-1.22541	9.69546e-17	1.1789	1.20477e-15	-0.1419	0.445862	-1.3208	2.27881e-19
C5_04470C	orf19.3932	orf19.3932	-1.14796	8.23487e-14	-0.271947	0.193539	-1.22108	9.34639e-15	0.876013	5.26235e-08	-0.0731201	0.746073	-0.949133	5.89182e-09
C6_00720C	orf19.3656	COX15	0.150078	0.354536	0.393809	0.0101588	-0.0517531	0.796943	0.243731	0.111324	-0.201831	0.173585	-0.445562	0.00113765
C1_10150W	orf19.4884	WOR1	-1.2199	0.0375994	0.0729002	NA	-1.21708	0.0476849	1.2928	0.0330822	0.00282105	0.99788	-1.28998	0.032672
C1_01360C	orf19.3325	orf19.3325	-1.04537	1.14052e-15	0.142985	0.481754	-1.21257	2.06561e-20	1.18835	6.10473e-20	-0.167201	0.29694	-1.35555	2.87158e-25
C1_06660W	orf19.6245	orf19.6245	-0.789272	3.12435e-24	0.241352	0.00919841	-1.2023	2.56967e-51	1.03062	1.90508e-40	-0.413029	1.03579e-06	-1.44365	3.61087e-73
C1_08170C	orf19.5094	BUL1	-0.700008	9.32743e-05	0.710982	0.000101394	-1.1881	2.18176e-10	1.41099	4.27518e-17	-0.488089	0.0170729	-1.89908	4.07175e-26
C6_03860C	orf19.5762	PGA61	-3.21423	6.16156e-98	-0.196482	0.265185	-1.18478	2.82373e-20	3.01775	7.83202e-84	2.02946	1.79828e-36	-0.988294	8.24965e-14
C3_02300W	orf19.1616	FGR23	-0.844727	1.85815e-13	0.266227	0.0595201	-1.17138	1.08567e-22	1.11095	1.74994e-22	-0.326656	0.0147987	-1.43761	1.45604e-33
C1_11270W	orf19.675	orf19.675	-2.53414	7.38992e-36	0.626341	0.0104458	-1.1699	2.70148e-08	3.16048	1.94571e-55	1.36424	5.60613e-11	-1.79624	1.50459e-18
C1_02270C	orf19.3684	orf19.3684	-1.23643	3.55276e-14	-0.488731	0.0124347	-1.16643	2.4682e-12	0.747699	1.94908e-05	0.0699974	0.769292	-0.677701	0.000130366
C4_03770W	orf19.1301	orf19.1301	-0.32281	0.00509988	-0.310343	0.0190455	-1.16506	4.02047e-26	0.0124666	0.96035	-0.842251	3.68783e-14	-0.854718	6.32551e-14
C1_00680W	orf19.6037	ASM3	-1.42178	8.0898e-23	1.18752	4.57227e-16	-1.16399	2.29132e-15	2.6093	2.10847e-76	0.257795	0.13603	-2.35151	1.02592e-61
C1_09180W	orf19.4776	LYS143	-1.58899	3.78622e-44	0.422911	0.000646873	-1.163	3.59613e-24	2.0119	1.25855e-70	0.425994	0.000910976	-1.58591	1.50613e-44
C2_05570C	orf19.6869	orf19.6869	-1.40313	5.47652e-58	-0.214621	0.0516201	-1.16258	1.51624e-39	1.18851	2.17699e-40	0.240545	0.018074	-0.947963	1.25953e-25
C2_08390W	orf19.1433	orf19.1433	-1.59024	8.56276e-48	-0.137246	0.401944	-1.16248	5.76288e-26	1.453	3.89915e-39	0.427758	0.000400266	-1.02524	5.92268e-20
C2_08450W	orf19.3635	orf19.3635	-1.26135	6.01982e-38	-0.0297763	0.876909	-1.15895	2.07989e-31	1.23158	1.69904e-35	0.102404	0.431523	-1.12917	2.86821e-29
C1_03000W	orf19.2991	HOL1	-1.09568	4.80918e-10	0.278709	0.241108	-1.15605	1.64159e-10	1.37439	3.34426e-15	-0.0603666	0.819582	-1.43476	9.36208e-16
C1_02590C	orf19.2947	SNZ1	-0.453187	0.0063413	0.037603	0.902776	-1.15307	7.85987e-14	0.49079	0.00346651	-0.699885	8.85474e-06	-1.19068	9.63582e-15
C2_03270W	orf19.903	GPM1	-1.28947	4.21035e-15	0.077482	0.805301	-1.14675	5.22547e-12	1.36696	7.5778e-17	0.142729	0.49743	-1.22423	1.20868e-13
C7_00110W	orf19.7111.1	SOD3	-6.41018	5.56638e-06	0.220429	NA	-1.14641	0.150993	6.63061	3.08627e-06	5.26376	0.000250017	-1.36684	0.0709911
C5_01170W	orf19.1955	orf19.1955	0.216233	0.238711	0.378524	0.047212	-0.24554	0.196666	0.162291	0.440179	-0.461773	0.00422161	-0.624064	0.000115306
CR_09090C	orf19.7305	orf19.7305	-2.11392	0.000103378	0.0110692	NA	-1.14574	0.037514	2.12499	0.000152327	0.968186	0.131031	-1.15681	0.0357303
C4_02490W	orf19.2753	ZCF15	-0.843107	0.0102068	-0.236127	0.649414	-1.14227	0.000803286	0.60698	0.105894	-0.299158	0.47	-0.906139	0.0114584
CR_02570C	orf19.164	orf19.164	-0.721683	6.2984e-06	-0.198899	0.396207	-1.14004	3.94171e-12	0.522784	0.00254955	-0.418361	0.020601	-0.941145	3.20095e-08
CR_01900C	orf19.2587	BIO5	-0.893032	0.000843495	-0.456687	0.196899	-1.13675	4.5135e-05	0.436345	0.189022	-0.243716	0.482404	-0.68006	0.0276806
C3_02810C	orf19.272	FAA21	-1.10993	5.38616e-29	-0.548284	6.52974e-07	-1.13558	5.64645e-29	0.561644	1.91929e-07	-0.0256528	0.873318	-0.587297	7.43371e-08
C5_04440C	orf19.3931	SFC1	-1.22462	2.85142e-09	-0.248037	0.421244	-1.13088	6.48907e-08	0.976579	4.10589e-06	0.0937343	0.742163	-0.882844	3.32679e-05
C6_00750C	orf19.3651	PGK1	-1.27437	2.65342e-14	0.139448	0.619382	-1.12995	2.60077e-11	1.41382	2.19072e-17	0.144426	0.500103	-1.2694	3.96474e-14
CR_09460C	orf19.7341.1	orf19.7341.1	-2.18177	4.19009e-05	0.118949	NA	-1.12933	0.034839	2.30072	2.1381e-05	1.05244	0.0881108	-1.24828	0.0171362
C2_05700W	orf19.6882	OSM1	-1.10846	0.00204265	0.173958	0.774012	-1.12332	0.00270447	1.28242	0.000391131	-0.0148596	0.979875	-1.29728	0.000393195
C3_06870W	orf19.6814	TDH3	-0.975257	0.00114582	0.201206	0.686198	-1.1224	0.000184749	1.17646	7.93956e-05	-0.147142	0.704971	-1.3236	5.98604e-06
C2_06720W	orf19.3150	GRE2	-1.45305	4.31794e-24	0.211026	0.296366	-1.11898	1.68235e-14	1.66408	4.57453e-31	0.334069	0.0468755	-1.33001	4.53082e-20
C6_03240W	orf19.5611	orf19.5611	-2.64447	1.92624e-16	-0.427357	0.298287	-1.1157	0.000307912	2.21711	3.13039e-11	1.52877	8.93627e-06	-0.688348	0.0405349
C4_00540C	orf19.4188	NMD5	-0.163172	0.176781	0.372284	0.00122666	0.474635	5.20097e-06	0.535456	2.31349e-07	0.637807	1.92783e-10	0.102351	0.42762
C4_06110C	orf19.4718	TRP5	-0.00164186	0.986818	0.372268	1.16623e-08	-0.0462205	0.588496	0.37391	1.21879e-09	-0.0445786	0.575363	-0.418489	9.75974e-12
C7_01510W	orf19.6578	orf19.6578	-1.4237	0.000669744	-0.332049	NA	-1.11414	0.0114746	1.09165	0.0186167	0.309556	0.578086	-0.782093	0.10099
C3_04120C	orf19.5856	orf19.5856	0.122215	0.481219	0.366928	0.0225982	0.456518	0.000999977	0.244713	0.117691	0.334303	0.0143201	0.08959	0.609845
C1_08400C	orf19.385	GCV2	0.608627	1.30031e-22	0.387533	1.1356e-08	-1.11361	2.14337e-70	-0.221094	0.00113488	-1.72223	3.51125e-170	-1.50114	1.54465e-127
C5_05220W	orf19.4015	CAG1	-0.967231	0.000106225	-0.0366344	0.941294	-1.10835	1.95016e-05	0.930597	0.000339071	-0.141121	0.686635	-1.07172	4.62825e-05
C6_04420W	orf19.2125	orf19.2125	-1.45803	8.3899e-10	-0.347148	0.289712	-1.08647	8.62003e-06	1.11089	1.14572e-05	0.371565	0.203754	-0.739321	0.00461439
C4_01410W	orf19.4645	BEM1	-0.23542	0.00890301	-0.0689552	0.626153	-1.08541	1.72844e-37	0.166465	0.097608	-0.849992	1.80587e-23	-1.01646	4.03649e-32
C2_07260C	orf19.2283	DQD1	0.13529	0.111971	0.363719	6.19278e-06	-0.0505713	0.63299	0.228429	0.00425403	-0.185861	0.0193401	-0.41429	3.72813e-08
CR_02810W	orf19.2839	CIRT4B	0.649042	0.000305489	0.343833	0.140294	-1.08011	1.15322e-08	-0.30521	0.146604	-1.72915	3.87673e-22	-1.42394	1.6159e-14
C4_02290W	orf19.2774	LAB5	-0.0298623	0.866381	0.363333	0.00314368	-0.641974	4.6415e-09	0.393196	0.000494252	-0.612112	1.46889e-08	-1.00531	3.75068e-21
CR_07950W	orf19.603	IMP4	0.219653	0.124011	0.361857	0.0151194	-0.0831273	0.641364	0.142204	0.395526	-0.302781	0.0231199	-0.444984	0.000718326
C1_01140C	orf19.3302	orf19.3302	-0.900045	0.0496962	-0.0199319	NA	-1.0759	0.0238978	0.880113	0.0720477	-0.17586	0.774648	-1.05597	0.0272485
C1_14060W	orf19.7214	orf19.7214	-1.3237	1.01697e-05	-0.518626	0.187108	-1.06269	0.000662107	0.80507	0.0178988	0.261004	0.50352	-0.544065	0.124602
CR_05750W	orf19.6637	orf19.6637	-0.803066	0.00494342	0.109684	0.828559	-1.05928	0.000177739	0.91275	0.00145713	-0.256212	0.446358	-1.16896	2.47649e-05
C1_08330C	orf19.5113	ADH2	-2.08595	1.16189e-25	-0.0688449	0.860042	-1.057	3.76051e-07	2.0171	5.50016e-24	1.02895	6.11244e-07	-0.988155	1.98179e-06
C5_01130W	orf19.1957	CYC3	-0.0488322	0.679232	0.354132	8.5935e-05	0.0911515	0.391138	0.402964	1.27819e-06	0.139984	0.129035	-0.26298	0.00244824
C3_03710W	orf19.6948	CCC1	0.527806	0.000758195	0.548134	0.00167576	-1.05406	4.43347e-10	0.0203285	0.949337	-1.58186	2.90228e-23	-1.60219	1.15018e-22
C3_05710W	orf19.7350	RCT1	-5.4828	2.71715e-48	-0.241475	0.695034	-1.05227	0.00574405	5.24132	4.77225e-44	4.43052	1.2963e-31	-0.810799	0.0377227
C1_07060C	orf19.6198.1	orf19.6198.1	-1.13078	0.0332354	-0.825445	0.212502	-1.04332	0.0584144	0.30533	0.694595	0.0874507	0.907731	-0.21788	0.750659
C5_02070C	orf19.3161	orf19.3161	0.0435173	0.748197	0.348157	0.000580727	-0.341264	0.000405361	0.30464	0.00147675	-0.384781	3.06808e-05	-0.689421	2.59744e-14
CR_03880W	orf19.465	IFF9	-0.0911164	0.344248	0.347574	3.62097e-05	0.818983	7.68282e-29	0.438691	1.36461e-08	0.910099	3.94959e-36	0.471409	4.15495e-10
C1_02130C	orf19.3670	GAL1	-0.830752	3.99094e-09	-0.22123	0.26479	-1.03953	4.41795e-13	0.609521	4.36661e-05	-0.208777	0.223958	-0.818299	3.23069e-08
C1_08410C	orf19.386	SAM4	-0.487703	6.59382e-13	0.331597	7.14134e-06	-1.0382	6.33056e-54	0.8193	6.47203e-35	-0.550493	9.76742e-16	-1.36979	2.66688e-93
C1_05560W	orf19.410.3	RIB4	-1.37189	4.71611e-37	-0.306553	0.0222939	-1.03452	3.04911e-21	1.06534	1.71356e-22	0.337374	0.0041994	-0.727963	6.51318e-11
C7_01850C	orf19.6534.2	CRN1	-1.32928	0.00898976	-1.04136	0.0848092	-1.03121	0.056616	0.287921	0.710319	0.298075	0.636228	0.0101538	0.987451
C4_03430W	orf19.3369	MOH1	-0.801825	0.00846778	-0.0518871	0.928769	-1.0307	0.000897131	0.749937	0.0198327	-0.22888	0.549539	-0.978818	0.00176539
C4_05250W	orf19.6864	orf19.6864	-6.08812	9.15637e-06	-0.436746	NA	-1.0299	0.141419	5.65138	6.09691e-05	5.05823	0.000297822	-0.59315	0.448692
CR_01910C	orf19.2590	BIO4	-2.39619	2.82354e-27	0.052555	0.89258	-1.02736	1.47288e-06	2.44875	6.24084e-28	1.36884	6.4257e-09	-1.07991	4.13506e-07
C3_04070C	orf19.918	CDR11	-2.11584	3.2628e-06	0.482488	0.398387	-1.01335	0.0286654	2.59833	6.66961e-09	1.10249	0.0303888	-1.49584	0.000498102
C7_01800C	orf19.6540	PFK2	-1.05874	1.91309e-06	-0.107215	0.790168	-1.01157	1.01603e-05	0.951526	3.73556e-05	0.0471717	0.89239	-0.904354	0.000106672
C1_02600W	orf19.2948	SNO1	-0.228272	0.00286721	0.127511	0.197186	-1.00942	6.65982e-45	0.355782	1.69557e-06	-0.781152	2.39483e-27	-1.13693	2.99689e-56
C1_04680W	orf19.778	PIL1	-0.576324	2.24114e-11	-0.214177	0.0458298	-1.00361	2.06774e-32	0.362147	6.27409e-05	-0.427282	1.16298e-06	-0.78943	3.28051e-20
C1_10550C	orf19.999	GCA2	-1.02949	2.8273e-16	-0.224664	0.193035	-1.0027	5.83997e-15	0.80483	7.1603e-10	0.0267951	0.895742	-0.778035	4.29854e-09
CR_06570C	orf19.915	orf19.915	-1.17084	3.54451e-25	0.258758	0.0604241	-1.00174	4.64297e-18	1.42959	9.08522e-37	0.169092	0.24421	-1.2605	6.43212e-28
C2_04450W	orf19.4507	orf19.4507	-1.83698	1.18904e-40	-0.211321	0.263222	-1.00133	2.39118e-13	1.62566	7.88914e-31	0.835647	1.49794e-08	-0.790008	2.19797e-08
CR_07250C	orf19.6143	orf19.6143	-1.13895	6.15312e-19	-0.173633	0.354039	-0.98643	5.87983e-14	0.965318	3.74967e-13	0.152521	0.365343	-0.812797	2.27045e-09
C1_10840C	orf19.2333	orf19.2333	-0.543635	1.48394e-12	0.140718	0.177001	-0.983556	1.08011e-37	0.684353	3.04113e-19	-0.439921	2.98161e-08	-1.12427	1.27636e-48
C3_02100W	orf19.1636	STE50	-1.14334	4.3432e-43	-0.158394	0.164956	-0.978302	2.19145e-31	0.984947	1.17075e-31	0.165039	0.0924335	-0.819908	6.22946e-22
CR_04530W	orf19.543	FUM11	-0.791425	3.26849e-36	-0.243166	0.000901402	-0.976547	1.50931e-53	0.548259	1.94641e-17	-0.185122	0.00840752	-0.733381	7.45824e-30
C2_06460W	orf19.23	RTA3	2.28641	6.87544e-15	0.628464	0.139077	-0.97557	0.015382	-1.65794	1.6208e-08	-3.26198	1.88986e-23	-1.60403	1.27055e-05
C3_03990C	orf19.2810	AAP1	0.586292	0.0380898	0.466501	0.193728	-0.974623	0.00155859	-0.119791	0.781879	-1.56092	1.94673e-08	-1.44112	7.34239e-07
CR_03500W	orf19.4393	CIT1	-0.555585	0.00156933	-0.330456	0.129933	-0.973654	8.20923e-09	0.225129	0.300866	-0.418068	0.0203086	-0.643197	0.000217661
C1_13100W	orf19.4936.1	orf19.4936.1	-6.05209	2.29757e-258	0.559431	1.643e-05	-0.973233	4.83509e-16	6.61152	0	5.07885	6.2541e-180	-1.53266	7.04161e-39
CR_01440C	orf19.2529.1	orf19.2529.1	-0.672361	0.00170918	0.618768	0.00872558	-0.970161	5.81064e-06	1.29113	1.80149e-10	-0.2978	0.225322	-1.58893	7.94786e-15
C4_00080C	orf19.376	orf19.376	-0.995902	1.02451e-15	-0.293801	0.0620487	-0.968826	1.70608e-14	0.702102	6.41336e-08	0.0270767	0.891134	-0.675025	2.65554e-07
CR_01420W	orf19.2528	orf19.2528	0.162562	0.278537	0.32811	0.0308166	0.223924	0.124656	0.165549	0.296918	0.0613621	0.707403	-0.104186	0.518184
C4_01690C	orf19.4624	HRT2	-0.387144	0.000164682	-0.147696	0.303167	-0.967371	2.39979e-22	0.239448	0.0357596	-0.580227	1.07919e-08	-0.819675	5.45158e-16
C1_03660W	orf19.3064.1	orf19.3064.1	-0.694104	0.000739719	-0.195948	0.533179	-0.966608	3.61015e-06	0.498156	0.0283147	-0.272504	0.263881	-0.77066	0.000363629
C5_04810W	orf19.3967	PFK1	-1.08119	3.53343e-11	-0.120263	0.66597	-0.961509	9.53164e-09	0.960929	1.09369e-08	0.119683	0.589623	-0.841246	8.65136e-07
C6_04520W	orf19.2138	ILS1	0.0522778	0.503748	0.325617	1.9029e-07	0.186001	0.00314639	0.273339	5.42926e-06	0.133723	0.0353455	-0.139616	0.030764
C6_03050C	orf19.5587	orf19.5587	-1.33751	9.54818e-22	-0.55483	0.000458908	-0.960414	1.43992e-11	0.782679	2.02375e-07	0.377095	0.0182222	-0.405584	0.011048
C3_03410C	orf19.338	orf19.338	-1.00358	5.52683e-45	-0.482311	5.97331e-10	-0.953981	7.4616e-40	0.521274	3.75094e-12	0.0496035	0.617862	-0.471671	5.92633e-10
C2_07790C	orf19.2202	orf19.2202	-1.3268	1.61665e-06	-0.497865	0.164888	-0.953061	0.000947576	0.828933	0.00839051	0.373737	0.276731	-0.455196	0.176189
CR_00780C	orf19.3278	GSY1	-0.893106	0.00255977	-0.105922	0.843094	-0.952928	0.00183648	0.787184	0.012456	-0.0598212	0.893718	-0.847005	0.00655273
C4_02880C	orf19.2708	orf19.2708	0.118065	0.458547	0.323105	0.0323261	-0.0391082	0.844491	0.20504	0.167828	-0.157173	0.27608	-0.362213	0.00663812
C2_02850W	orf19.5820	UGA6	-1.20682	0.000308639	0.430509	0.32745	-0.950773	0.00699414	1.63733	5.7247e-07	0.25605	0.558537	-1.38128	3.17568e-05
C2_06990W	orf19.2253	orf19.2253	-0.441101	0.0262446	0.108989	0.738444	-0.949729	1.31191e-06	0.550091	0.00592612	-0.508628	0.013748	-1.05872	6.31572e-08
C4_05110C	orf19.740	HAP41	-0.0564809	0.628635	0.320307	0.000616758	-0.723646	1.9393e-17	0.376788	1.04325e-05	-0.667165	2.4331e-15	-1.04395	1.90411e-35
C3_01100W	orf19.2512	orf19.2512	-0.266808	0.0462708	-0.0122658	0.959695	-0.937892	1.11873e-13	0.254542	0.0758036	-0.671084	1.38664e-07	-0.925627	5.31209e-13
C6_00170C	orf19.6319	orf19.6319	0.178484	0.221908	0.312349	0.0387022	-0.022596	0.915441	0.133865	0.423399	-0.20108	0.147059	-0.334945	0.0122846
C5_04120C	orf19.3894	orf19.3894	0.107379	0.472315	0.310137	0.0268278	-0.0363823	0.844491	0.202759	0.139022	-0.143761	0.28607	-0.34652	0.00515464
C3_03450C	orf19.342	BMT7	-2.17252	1.29198e-21	-0.700089	0.00509689	-0.931357	2.62192e-05	1.47244	1.90951e-09	1.24117	3.59448e-07	-0.231268	0.420924
C6_01430C	orf19.3441	FRP6	-1.4646	0.000647594	-1.0387	0.0439279	-0.929927	0.0428757	0.425902	0.502121	0.534677	0.294661	0.108775	0.866349
C1_03890W	orf19.4463	CIS308	1.90992	0.0192095	0.551072	NA	-0.926559	0.421387	-1.35885	0.125536	-2.83648	0.000861348	-1.47763	0.145333
C1_10710C	orf19.2350	orf19.2350	-0.632764	0.000776977	0.105674	0.742837	-0.925953	1.08433e-06	0.738438	9.95375e-05	-0.293189	0.175687	-1.03163	4.53866e-08
C1_13740W	orf19.5011	KAR9	-1.54027	4.57771e-20	-0.670596	0.000378985	-0.924535	6.1189e-08	0.869679	2.14903e-06	0.61574	0.000851999	-0.253939	0.228187
CR_06310W	orf19.3885	orf19.3885	-1.31487	0.00865685	0.219624	NA	-0.923683	0.0862337	1.53449	0.00235022	0.391185	0.537032	-1.14331	0.0258506
CR_06860C	orf19.1847	ARO10	0.171627	0.076325	0.303886	0.00193771	-0.341305	0.000178786	0.132259	0.216971	-0.512931	2.21576e-09	-0.64519	6.61395e-14
C4_02720C	orf19.2726	orf19.2726	-1.2462	4.2071e-20	0.304014	0.0640263	-0.9234	2.64027e-11	1.55021	1.67678e-30	0.322798	0.0435005	-1.22741	2.41376e-19
C4_01360W	orf19.4651	PGA53	-0.237213	0.00211926	-0.230821	0.00807642	-0.921834	7.68877e-37	0.00639277	0.970165	-0.684621	7.88439e-21	-0.691013	1.73638e-20
C4_03890W	orf19.5045	PTP2	-0.620702	0.00143925	-0.153507	0.620203	-0.920669	2.78863e-06	0.467195	0.0287961	-0.299967	0.17996	-0.767162	0.00015063
C2_01890W	orf19.1499	CTF1	-0.581188	6.49204e-08	-0.231293	0.0944273	-0.920477	2.40237e-17	0.349895	0.00297488	-0.33929	0.00368385	-0.689184	9.69977e-10
C1_05140W	orf19.4056	BRG1	-4.20051	3.59895e-97	0.356697	0.197298	-0.917575	1.31116e-05	4.55721	3.27909e-114	3.28294	2.69143e-59	-1.27427	3.98364e-10
C2_10160W	orf19.1765	orf19.1765	-0.801623	5.19607e-09	0.19861	0.306866	-0.912734	5.56914e-11	1.00023	2.09396e-13	-0.111111	0.539495	-1.11134	7.65116e-16
CR_04740C	orf19.6317	ADE6	0.459475	3.06438e-10	0.0169717	0.908836	-0.912105	8.75451e-37	-0.442503	1.9112e-09	-1.37158	2.366e-83	-0.929077	7.29193e-38
CR_03260W	orf19.2397.3	orf19.2397.3	-0.411046	0.00713444	-0.27395	0.163665	-0.906575	2.394e-09	0.137096	0.525612	-0.495529	0.00170245	-0.632625	8.73287e-05
C4_06760W	orf19.3133	GUT2	-0.458337	8.87194e-08	-0.0219713	0.894414	-0.893941	3.42414e-26	0.436366	5.8158e-07	-0.435604	5.94725e-07	-0.871969	1.24763e-24
C1_09020W	orf19.4758	orf19.4758	-0.13896	0.230763	0.297932	0.00870742	-0.491964	9.87038e-07	0.436893	1.02481e-05	-0.353003	0.000467782	-0.789896	4.32316e-16
C6_02030C	orf19.3508	orf19.3508	-1.45332	0.00243572	-1.39136	0.0122058	-0.890696	0.0880445	0.0619575	0.953972	0.562621	0.313648	0.500664	0.4092
C1_05540C	orf19.411	orf19.411	-0.544666	4.4217e-05	-0.380429	0.014662	-0.8882	1.28237e-11	0.164237	0.346768	-0.343534	0.0149694	-0.507772	0.000238774
C7_02230W	orf19.6491	orf19.6491	-1.50962	0.00948276	-0.588859	NA	-0.886767	0.161646	0.920758	0.18972	0.622851	0.367578	-0.297907	0.697207
C1_13480W	orf19.4980	HSP70	-0.558727	0.0126123	0.11092	0.771516	-0.881817	4.24449e-05	0.669647	0.00266821	-0.323091	0.176493	-0.992738	2.55792e-06
C6_01510W	orf19.3433	OYE23	-0.43664	0.0385782	-0.0920711	0.800718	-0.881072	1.63531e-05	0.344569	0.14272	-0.444432	0.0404721	-0.789001	0.000152584
C2_03640W	orf19.854	UGA11	-0.336629	0.00144053	-0.309302	0.0128179	-0.878885	6.19561e-17	0.0273271	0.892411	-0.542256	4.34766e-07	-0.569583	3.7189e-07
C5_01755C	MTLALPHA1	MTLALPHA1	-0.744222	0.000233123	0.190634	0.52993	-0.875935	2.89464e-05	0.934856	3.70602e-06	-0.131713	0.628332	-1.06657	2.24945e-07
C2_03370W	orf19.889	THI20	-0.801171	0.0116786	-0.248448	0.612263	-0.871179	0.00797404	0.552723	0.12879	-0.0700079	0.879844	-0.622731	0.0750185
C1_13200C	orf19.4948	REX3	-0.142745	0.298538	0.294633	0.031174	0.288629	0.0183592	0.437378	0.000180656	0.431374	0.000117515	-0.00600476	0.970988
C6_03880W	orf19.5763	orf19.5763	-1.33166	5.24279e-19	-0.233567	0.262423	-0.870231	1.18496e-08	1.09809	1.51422e-12	0.461425	0.00595916	-0.636664	6.84235e-05
C2_02180W	orf19.1534	orf19.1534	-0.7856	2.23875e-15	-0.276762	0.0238181	-0.866943	1.16129e-17	0.508838	1.50438e-06	-0.0813429	0.545674	-0.590181	2.79617e-08
C1_13370W	orf19.4963	orf19.4963	0.0476972	0.762277	0.294095	0.0186612	-0.190976	0.122668	0.246398	0.0360496	-0.238673	0.0346442	-0.485071	6.03502e-06
C1_03720C	orf19.1037	orf19.1037	-1.06144	3.22311e-46	-0.332869	8.25788e-05	-0.863764	1.49177e-30	0.728576	1.03063e-21	0.19768	0.0186118	-0.530896	7.95652e-12
C1_08210C	orf19.5100	MLT1	0.00498853	0.961021	0.292022	2.15092e-05	0.444869	9.15778e-13	0.287034	9.2925e-06	0.439881	7.84061e-13	0.152847	0.0266709
CR_01950W	orf19.2594	orf19.2594	0.186212	0.0825713	0.291522	0.0098199	-0.213061	0.0518118	0.105311	0.4197	-0.399273	3.73669e-05	-0.504583	2.25563e-07
C2_05770W	orf19.6888	orf19.6888	-3.45637	1.68727e-54	0.0962224	0.74603	-0.862998	9.20514e-07	3.55259	8.40503e-57	2.59337	1.81203e-29	-0.95922	4.45536e-08
C4_01520C	orf19.4632	RPL20B	0.128815	0.193029	0.289548	0.00222518	-0.26918	0.0025902	0.160733	0.102203	-0.397995	2.01413e-06	-0.558728	1.51793e-11
CR_05090C	orf19.644	HGT9	-2.18159	0.00347892	0.140041	NA	-0.859502	0.283951	2.32163	0.00229819	1.32209	0.108354	-0.999542	0.192182
CR_04750W	orf19.6316.4	orf19.6316.4	0.328862	0.0062529	0.0462316	0.832011	-0.856544	3.25778e-13	-0.282631	0.027626	-1.18541	1.53363e-25	-0.902776	2.22632e-14
C3_03200C	orf19.319	orf19.319	0.231218	0.057423	0.285903	0.0367183	0.0153143	0.940004	0.0546845	0.765858	-0.215904	0.0734891	-0.270589	0.0282713
CR_01010W	orf19.3255	TEN1	-1.93869	0.00360817	0.0168971	NA	-0.853684	0.232805	1.95559	0.00467252	1.085	0.148054	-0.870581	0.217435
C5_01250W	orf19.1944	GPR1	-0.313684	0.0161783	0.449308	0.000826781	-0.849311	9.92378e-12	0.762992	1.85514e-10	-0.535627	2.54696e-05	-1.29862	1.43491e-26
C4_06610C	orf19.2871	SDH12	-0.085437	0.381262	0.285235	0.000994346	-0.196851	0.0220301	0.370672	2.41385e-06	-0.111413	0.214442	-0.482085	4.38688e-10
C5_04350C	orf19.3921	orf19.3921	0.0748677	0.419532	0.283814	0.000476161	-0.00481372	0.970879	0.208946	0.00791271	-0.0796814	0.36203	-0.288627	0.000128832
C2_06730W	orf19.3149	LSP1	-1.31156	1.46041e-24	0.0935769	0.673616	-0.847716	1.02456e-10	1.40514	9.32161e-28	0.463848	0.000844623	-0.941293	5.58701e-13
C1_03430W	orf19.3043	orf19.3043	-0.462774	0.0022165	-0.134792	0.563131	-0.847458	9.53164e-09	0.327982	0.0488872	-0.384684	0.0143017	-0.712665	2.21677e-06
CR_03630W	orf19.4361	IFF3	-0.155073	0.227658	0.283337	0.0299941	0.390371	0.00045637	0.43841	8.1812e-05	0.545444	2.15106e-07	0.107034	0.42762
CR_05720W	orf19.6640	TPS1	-0.568551	0.000192534	0.208386	0.325802	-0.845145	3.98983e-08	0.776938	2.5103e-07	-0.276594	0.110018	-1.05353	3.97333e-12
CR_02260C	orf19.3743	orf19.3743	-0.94842	6.35575e-08	-0.725256	0.000283474	-0.829447	4.98901e-06	0.223163	0.370731	0.118972	0.618651	-0.104191	0.686202
C4_04850C	orf19.3794	CSR1	-1.53567	2.01603e-70	0.0445167	0.781105	-0.819395	3.38969e-21	1.58019	2.89866e-73	0.716279	3.42083e-15	-0.863912	4.08911e-23
CR_03850W	orf19.4356	HGT3	-0.463	0.00072603	-0.666762	6.24842e-06	-0.817973	1.87662e-09	-0.203762	0.241393	-0.354973	0.0147555	-0.151211	0.396469
C2_01340W	orf19.1991	orf19.1991	-1.7465	7.3736e-130	-0.215754	0.0153768	-0.817473	3.49913e-29	1.53074	4.13579e-99	0.929023	8.56233e-37	-0.601719	4.59952e-16
C4_01260W	orf19.4662	RLM1	-0.343804	0.00307211	0.155104	0.332724	-0.81731	5.02917e-13	0.498908	1.19167e-05	-0.473507	4.56611e-05	-0.972415	6.4419e-18
C4_06820C	orf19.3127	CZF1	-0.723186	8.8837e-13	0.138103	0.350171	-0.814506	3.46923e-15	0.861289	1.87487e-17	-0.0913207	0.495922	-0.952609	3.24956e-20
C4_06570C	orf19.2877	PDC11	-1.32391	1.17094e-07	0.173287	0.687252	-0.811461	0.00224831	1.4972	1.81278e-09	0.512447	0.0625467	-0.984748	0.000122231
C6_00790C	orf19.3646	CTR1	-3.02701	4.88538e-06	0.236323	0.847615	-0.810357	0.315582	3.26333	9.01222e-07	2.21665	0.00104911	-1.04668	0.162785
CR_03620C	orf19.4380.1	orf19.4380.1	-0.52475	2.28523e-05	-0.0222801	0.928769	-0.802496	1.50369e-10	0.50247	9.08437e-05	-0.277746	0.0443456	-0.780216	8.59131e-10
C3_07310C	orf19.6763	SLK19	-1.61542	3.4279e-14	-0.236555	0.458497	-0.797756	0.000336443	1.37886	3.26009e-10	0.81766	0.000320848	-0.561201	0.0161218
C2_02920W	orf19.5813	orf19.5813	-0.0578745	0.713258	0.269774	0.0422673	0.43195	0.000101248	0.327648	0.00489279	0.489824	4.45428e-06	0.162176	0.200728
C6_00840W	orf19.85	GPX2	-2.48472	6.50971e-226	0.490143	1.66631e-09	-0.787062	7.60295e-25	2.97487	0	1.69766	1.28368e-103	-1.27721	1.45883e-64
C6_02830W	orf19.5557	MNN45	-0.767176	4.16356e-07	-0.342912	0.0730699	-0.785958	4.68093e-07	0.424264	0.013491	-0.0187823	0.938735	-0.443047	0.00922637
C4_01940W	orf19.4599	PHO89	1.90213	5.73108e-53	-0.128495	0.556828	-0.785077	1.53999e-08	-2.03062	3.28148e-58	-2.68721	1.43417e-98	-0.656582	3.91693e-06
C2_00170C	orf19.2115	HMA1	0.122182	0.120881	0.265743	0.000509514	-0.145979	0.0627394	0.143561	0.0710418	-0.268161	0.000120957	-0.411722	2.07787e-09
C4_04720W	orf19.3810	orf19.3810	0.312815	0.000472037	-0.205487	0.0634807	-0.78455	3.85671e-19	-0.518302	3.60673e-09	-1.09737	7.28524e-38	-0.579063	1.59888e-10
CR_04275W	SCR1	SCR1	2.09835	4.11343e-10	1.73323	1.66966e-06	-0.784168	0.0427285	-0.365122	0.43009	-2.88252	3.91384e-18	-2.5174	7.3699e-14
C1_08970W	snR128	snR128	0.152044	0.110632	0.265423	0.00688861	-0.345274	9.8866e-05	0.113379	0.290875	-0.497318	2.47168e-09	-0.610696	4.79111e-13
C1_09190C	orf19.4777	DAK2	-0.801246	1.94659e-22	-0.0445448	0.773535	-0.777097	1.05736e-20	0.756702	8.73745e-20	0.0241495	0.846719	-0.732552	2.88768e-18
C6_02500C	orf19.5519	GCV1	0.744668	6.78565e-25	0.0447994	0.742837	-0.77425	9.532e-25	-0.699869	1.01809e-21	-1.51892	9.48525e-97	-0.819049	3.36024e-27
C2_05990C	orf19.4121	orf19.4121	-1.92471	2.47999e-14	-0.280281	0.426038	-0.771794	0.00243628	1.64443	4.39225e-10	1.15292	1.91524e-05	-0.491513	0.0769291
C1_01010W	orf19.3290	orf19.3290	0.0777614	0.56076	0.263605	0.0296916	-0.401505	0.0001554	0.185843	0.113894	-0.479267	2.01413e-06	-0.66511	5.404e-11
C4_00460C	orf19.5675	orf19.5675	0.0753964	0.558527	0.262808	0.0233466	-0.0655488	0.6284	0.187412	0.0942598	-0.140945	0.200343	-0.328357	0.00119527
C1_03380W	orf19.3038	TPS2	-0.719875	9.43597e-15	0.046133	0.793947	-0.768609	2.69326e-16	0.766008	2.17644e-16	-0.048734	0.707403	-0.814742	4.52836e-18
C5_00930C	orf19.1974	TFS1	-0.568727	3.72496e-09	-0.264557	0.0238181	-0.768126	1.3336e-15	0.304169	0.00383922	-0.1994	0.0649169	-0.503569	4.04672e-07
C1_08960W	snR190	snR190	0.411641	0.00333219	0.452686	0.00370617	-0.764596	1.40373e-07	0.0410442	0.867047	-1.17624	6.44738e-18	-1.21728	3.4463e-18
C4_03830W	orf19.5038	orf19.5038	0.447728	0.0075448	0.293905	0.18171	-0.758099	2.27201e-05	-0.153823	0.495914	-1.20583	2.44568e-13	-1.052	1.39014e-09
C6_01710C	orf19.3415	PTK2	-0.921396	1.99082e-35	0.161992	0.0945413	-0.755896	9.83049e-24	1.08339	2.45294e-48	0.1655	0.0538023	-0.917888	2.01808e-34
CR_08080W	orf19.6366	orf19.6366	0.531434	0.00852117	0.339311	0.204098	-0.754329	0.00057567	-0.192123	0.47145	-1.28576	9.02863e-11	-1.09364	1.82482e-07
C1_03680W	orf19.3066	ENG1	2.28286	3.38066e-113	0.724617	1.11052e-10	-0.753584	8.06721e-12	-1.55824	8.87924e-54	-3.03644	2.79049e-191	-1.4782	5.00155e-44
C5_03950W	orf19.3216	orf19.3216	-0.17256	0.0306882	-0.42426	1.70789e-07	-0.751778	4.75682e-24	-0.251699	0.00191242	-0.579218	7.0238e-15	-0.327518	5.8706e-05
C2_05260W	orf19.3555	BUD14	-1.12222	5.22227e-53	-0.181126	0.0526952	-0.750413	4.7118e-24	0.941098	2.93486e-36	0.371811	2.26861e-06	-0.569287	8.8271e-14
C1_06940C	orf19.6214	ATC1	-1.05509	4.37279e-16	-0.0429157	0.862654	-0.746885	2.23842e-08	1.01218	3.1085e-14	0.30821	0.0410914	-0.703969	2.52478e-07
C1_10110W	orf19.4880	orf19.4880	-1.1926	1.19217e-05	0.317649	0.396872	-0.74526	0.00998421	1.51024	2.08671e-08	0.447336	0.15953	-1.06291	0.000100861
C3_00930W	orf19.2496	ATO2	-0.792445	0.0336065	0.0659398	0.922621	-0.744076	0.0535761	0.858385	0.0237114	0.0483697	0.928081	-0.810015	0.03003
C3_05990C	orf19.7380	orf19.7380	-4.20291	1.33592e-05	-0.351233	NA	-0.741494	0.342604	3.85168	0.000118019	3.46142	0.000461307	-0.390261	0.648765
C4_02740W	orf19.2724	orf19.2724	-0.42928	2.41611e-07	0.0959524	0.443505	-0.740049	1.6163e-19	0.525233	2.08688e-10	-0.310769	0.000297086	-0.836001	1.64391e-24
C5_03450W	snR40	snR40	2.87044	0.00589008	1.74721	NA	-0.735895	NA	-1.12323	0.286992	-3.60634	0.00219335	-2.4831	0.0620894
C4_05390W	orf19.1796	orf19.1796	-0.527348	0.017378	-0.564763	0.0299941	-0.734091	0.00108328	-0.0374147	0.934758	-0.206743	0.434888	-0.169328	0.566815
C1_12830C	orf19.4913	orf19.4913	-0.637633	5.01833e-09	-0.176792	0.246502	-0.732158	3.17688e-11	0.460841	6.09691e-05	-0.0945246	0.501363	-0.555366	1.03794e-06
C1_12450C	orf19.5219	IRA2	0.0964962	0.215714	0.252073	0.000610094	-0.257037	0.000215947	0.155577	0.0349586	-0.353533	6.69201e-08	-0.50911	8.91798e-15
CR_08000C	orf19.597	orf19.597	0.0803639	0.536035	0.251688	0.0350668	-0.318064	0.00278505	0.171324	0.14241	-0.398428	6.23615e-05	-0.569752	1.21307e-08
C4_01450W	orf19.4640	PWP1	0.129453	0.253181	0.251463	0.0272648	-0.227202	0.0317731	0.12201	0.31768	-0.356655	0.000200087	-0.478664	5.78161e-07
C1_07940W	snR67	snR67	1.47455	4.61649e-05	0.593283	0.264567	-0.728885	0.140229	-0.881263	0.0226629	-2.20343	8.81768e-09	-1.32217	0.00223817
C1_09120W	orf19.4769	IPT1	-1.17923	4.6133e-47	-0.181847	0.0895803	-0.728545	2.04513e-18	0.997379	3.21661e-33	0.450682	1.75238e-07	-0.546698	1.37776e-10
C4_05900C	orf19.1277	orf19.1277	-1.3923	3.01952e-37	0.334831	0.010562	-0.725352	1.00167e-10	1.72713	6.69199e-57	0.666951	4.3015e-09	-1.06018	4.45698e-22
C2_00080C	orf19.1914	FAV3	-1.0565	0.00285295	-0.0378654	0.951422	-0.724873	0.0576619	1.01863	0.00644929	0.331626	0.448729	-0.687008	0.0766099
C1_05440C	orf19.419	orf19.419	-0.49536	0.00946862	-0.212971	0.430931	-0.723267	0.000130008	0.282389	0.209388	-0.227907	0.292518	-0.510296	0.00989086
C5_00670C	orf19.921	HMS1	0.341887	0.000139576	-0.149132	0.222149	-0.722137	2.51908e-16	-0.491019	3.16184e-08	-1.06402	1.78691e-35	-0.573006	2.003e-10
C7_03440W	orf19.1332	SNG4	-0.941799	8.03199e-14	0.10071	0.62939	-0.719676	3.08827e-08	1.04251	2.35322e-16	0.222122	0.142211	-0.820387	2.57612e-10
C3_00940W	orf19.2498	orf19.2498	-0.0695259	0.553326	0.24491	0.0183538	0.83444	1.26876e-23	0.314436	0.000567065	0.903966	4.5669e-28	0.589529	3.67807e-12
C2_07950W	orf19.2186	SEH1	0.0919103	0.470685	0.243965	0.0439279	0.308393	0.00302437	0.152054	0.207608	0.216483	0.0369468	0.0644286	0.623682
C5_05490C	orf19.4051	HTS1	0.108529	0.252725	0.242858	0.00812964	0.0489624	0.663504	0.134329	0.157522	-0.0595668	0.551143	-0.193896	0.0237134
C4_06780C	orf19.3131	OYE32	-0.499864	3.57041e-05	-0.253888	0.0984139	-0.719321	3.29859e-09	0.245976	0.0832769	-0.219457	0.108951	-0.465433	0.000294085
C6_01900C	orf19.3392	DOG1	-1.63588	5.49165e-87	-0.198745	0.0530742	-0.714397	2.89308e-18	1.43714	9.45431e-65	0.921485	1.10935e-26	-0.515652	1.3752e-09
C7_01990C	orf19.6522	orf19.6522	-0.822822	3.92585e-09	-0.152762	0.475429	-0.713583	7.26597e-07	0.67006	4.51695e-06	0.109239	0.554333	-0.560821	0.000165327
C4_04380C	orf19.1409.2	orf19.1409.2	-3.54379	0	-0.0391697	0.813998	-0.713572	4.09406e-16	3.50462	0	2.83022	2.85937e-212	-0.674402	1.92013e-14
C1_12910W	orf19.4921.1	orf19.4921.1	0.62542	0.000146151	1.01533	1.57589e-09	-0.712622	3.59409e-05	0.389914	0.0278016	-1.33804	6.50948e-17	-1.72796	3.43181e-27
C2_00940W	orf19.2030	orf19.2030	-0.481781	1.2185e-05	0.211667	0.132183	-0.707232	1.74655e-10	0.693448	1.52365e-10	-0.22545	0.0678135	-0.918899	4.73999e-17
C1_08770W	orf19.4735	orf19.4735	-0.24138	0.0147895	-0.530803	1.57422e-07	-0.702767	5.24972e-14	-0.289423	0.0049406	-0.461387	1.09721e-06	-0.171964	0.127893
C4_04480C	orf19.3838	EFB1	0.122976	0.0964391	0.238039	0.00110611	-0.215422	0.0018957	0.115063	0.141711	-0.338398	1.80194e-07	-0.453461	1.84513e-12
C2_00500W	orf19.2077	ZCF9	-0.81968	1.79272e-09	-0.0759025	0.756867	-0.701288	6.49531e-07	0.743778	1.39649e-07	0.118392	0.509605	-0.625385	1.50436e-05
C1_02810W	orf19.2969	RAD16	-0.322172	0.00143925	0.0309529	0.86867	-0.696895	8.72115e-13	0.353125	0.000574483	-0.374723	0.000195037	-0.727848	9.46084e-14
CR_02500W	orf19.175	orf19.175	0.375893	1.94655e-06	-0.304954	0.00110611	-0.69547	2.28063e-17	-0.680847	1.14786e-17	-1.07136	2.09139e-42	-0.390516	9.61596e-06
CR_04660C	orf19.1738	UGP1	-1.39614	2.56025e-84	-0.0263307	0.85134	-0.695257	8.94125e-22	1.36981	6.06097e-80	0.700881	3.30349e-21	-0.668926	5.86372e-20
C5_03300C	orf19.2650	orf19.2650	-0.39391	0.017034	-0.697572	8.43999e-05	-0.695204	1.97628e-05	-0.303662	0.118134	-0.301294	0.088426	0.00236753	0.991379
CR_05610C	orf19.5843	SRR1	-1.44422	1.00945e-34	0.118812	0.521969	-0.693628	8.66989e-09	1.56303	4.27983e-40	0.750588	9.66572e-10	-0.81244	9.96971e-12
CR_09550C	orf19.6607	NUO1	-0.967124	1.10194e-11	-0.0806866	0.751968	-0.692033	2.74817e-06	0.886438	1.65276e-09	0.275092	0.100218	-0.611346	5.44805e-05
C2_09460C	orf19.1604	RHA1	-0.657675	2.9055e-05	0.3963	0.0299941	-0.686755	2.3888e-05	1.05398	4.37144e-12	-0.0290794	0.906507	-1.08305	3.38997e-12
C3_02790W	orf19.270	orf19.270	-1.10879	9.93112e-08	-0.315652	0.274123	-0.686594	0.00172881	0.793136	0.000464729	0.422194	0.0779069	-0.370942	0.13408
C3_00850C	orf19.6160	orf19.6160	-0.913797	2.40834e-39	-0.0020316	0.985703	-0.686229	2.47413e-22	0.911766	5.49383e-39	0.227569	0.00263455	-0.684197	3.81108e-22
C4_00720W	orf19.4170	CSP2	-0.935874	3.7361e-18	-0.0820231	0.658336	-0.684281	6.51376e-10	0.853851	1.26806e-14	0.251593	0.0433883	-0.602258	1.18235e-07
C7_02920W	orf19.5169	orf19.5169	-1.02807	7.49191e-05	0.116445	0.801824	-0.681472	0.0141112	1.14452	1.29121e-05	0.346599	0.259599	-0.797916	0.00311049
C7_02930C	orf19.5168	orf19.5168	0.148822	0.135134	0.227316	0.0327087	0.160195	0.115376	0.0784936	0.53163	0.0113732	0.932498	-0.0671203	0.55894
C1_06130C	orf19.2432	HAC1	-2.09609	3.89166e-41	0.0541654	0.84637	-0.676967	8.6929e-06	2.15026	2.48719e-42	1.41913	2.35876e-18	-0.731132	1.51546e-06
C2_10210C	orf19.1760	RAS1	-1.29021	3.56641e-71	0.255085	0.00285917	-0.676592	4.45753e-20	1.54529	1.29117e-101	0.613617	1.49178e-16	-0.931676	2.05603e-37
CR_08140W	snR65	snR65	1.13938	0.000180603	0.480467	0.280214	-0.674151	0.0862846	-0.658916	0.048718	-1.81353	9.41616e-09	-1.15462	0.00107977
C3_04530C	orf19.5908	TEC1	-1.31694	1.07545e-05	0.789854	0.0115551	-0.666861	0.0373145	2.10679	1.2949e-13	0.650078	0.0532972	-1.45671	2.25172e-07
C4_05430C	orf19.1799	GAP5	0.325007	0.000167382	-0.0322279	0.843131	-0.665176	3.67708e-15	-0.357235	4.30401e-05	-0.990184	1.69649e-33	-0.632948	1.12503e-13
C6_03270C	orf19.5615	AYR2	-1.1248	5.97932e-55	-0.340739	2.59521e-05	-0.664954	8.76432e-20	0.784061	8.32152e-26	0.459845	1.57302e-09	-0.324216	3.52081e-05
CR_08770W	#N/A	RDN18	1.19487	0.00711028	0.664369	0.250671	-0.662781	0.187725	-0.530498	0.332196	-1.85765	9.94894e-06	-1.32715	0.00258413
C1_01450W	orf19.3331	ABC1	0.065731	0.531697	0.221084	0.0195012	-0.297767	0.000373345	0.155354	0.0919262	-0.363498	4.68994e-06	-0.518851	6.50973e-11
C1_05810W	orf19.2471	GIM5	0.120764	0.236308	0.22091	0.0357799	0.0899789	0.420794	0.100146	0.381572	-0.0307852	0.792254	-0.130931	0.199141
C6_00130C	orf19.6324	VID27	0.172252	0.0596365	0.219124	0.0283353	0.131479	0.18405	0.0468717	0.725533	-0.040773	0.711421	-0.0876447	0.397339
C6_00930C	orf19.94	orf19.94	-0.428322	0.000247074	-0.338621	0.0142414	-0.658154	1.92603e-08	0.0897008	0.614572	-0.229833	0.0762612	-0.319533	0.0138746
C2_03260W	orf19.904	orf19.904	-0.299792	0.00995578	-0.103209	0.561745	-0.654203	5.96886e-09	0.196583	0.141164	-0.354411	0.00234789	-0.550993	1.86722e-06
C4_03360C	orf19.3363	VTC4	0.331728	1.94446e-05	0.0709481	0.569898	-0.646771	4.98705e-17	-0.26078	0.00139203	-0.978499	3.7856e-39	-0.717719	1.47501e-20
C2_08920W	orf19.215	orf19.215	-0.609836	0.0133862	0.2245	0.52993	-0.642608	0.0122243	0.834336	0.00059251	-0.0327722	0.929917	-0.867108	0.000393195
C3_01250W	orf19.1727	PMC1	-0.806361	0.00453411	-0.0952048	0.85143	-0.641254	0.0351305	0.711156	0.020718	0.165107	0.655776	-0.546049	0.0847672
C4_00890W	orf19.4704	ARO1	0.109686	0.109843	0.211966	0.0017608	-0.0461184	0.57455	0.102279	0.159316	-0.155805	0.0143505	-0.258084	2.65466e-05
C1_01260C	orf19.3314	TRS20	-0.83056	2.30309e-08	-0.316234	0.0979334	-0.63934	3.57117e-05	0.514326	0.00160398	0.191219	0.292518	-0.323107	0.0611211
C1_03350C	orf19.3034	RLI1	0.0943912	0.288248	0.210837	0.0156986	0.118526	0.175928	0.116445	0.194029	0.024135	0.811171	-0.0923103	0.301368
C7_01940C	orf19.6527	orf19.6527	-0.801718	7.114e-18	-0.117647	0.402418	-0.638458	2.06202e-11	0.684071	7.45187e-13	0.16326	0.139291	-0.520811	9.4765e-08
CR_08250C	orf19.6387	HSP104	-0.458441	3.66994e-05	0.0458309	0.822078	-0.638158	5.24646e-09	0.504272	5.92708e-06	-0.179717	0.147357	-0.683989	2.7408e-10
C3_01960C	orf19.1652	POX1-3	-0.384155	8.48512e-07	-0.408948	1.28214e-06	-0.637676	1.70865e-16	-0.0247934	0.866009	-0.253521	0.00197616	-0.228728	0.00799627
CR_02430C	orf19.3722	orf19.3722	0.0827532	0.330489	0.202335	0.0141236	-0.0852075	0.332421	0.119582	0.15082	-0.167961	0.0225564	-0.287543	6.04786e-05
CR_08810W	#N/A	RDN25	0.902393	0.0448324	0.367085	0.57453	-0.636579	0.194523	-0.535308	0.310048	-1.53897	0.000207005	-1.00366	0.0236414
C1_09220W	orf19.4780	orf19.4780	-1.19715	1.3867e-45	-0.099304	0.449662	-0.635293	1.76069e-13	1.09785	1.17382e-37	0.561859	1.88051e-10	-0.535989	1.04558e-09
C1_08980C	orf19.4754	ZWF1	-0.359603	7.92269e-05	-0.181216	0.113823	-0.634422	6.70547e-13	0.178386	0.088158	-0.274819	0.00316279	-0.453206	5.18834e-07
C3_01830C	orf19.1663	MNT2	-1.7722	7.27561e-97	-0.180851	0.0994469	-0.632864	1.16985e-13	1.59135	1.94524e-76	1.13934	2.62947e-39	-0.452013	2.77504e-07
C2_10590W	orf19.5338	GAL4	-0.819825	0.000711822	0.377876	0.225339	-0.631782	0.0142937	1.1977	3.83161e-07	0.188043	0.539962	-1.00966	2.57966e-05
CR_06300C	orf19.3884	FGR50	1.36242	7.86334e-13	0.412491	0.118744	-0.63053	0.00689642	-0.949933	1.21895e-06	-1.99295	5.36156e-24	-1.04302	1.60727e-06
C1_07190W	orf19.4448	SOG2	0.00478615	0.969811	0.19403	0.0447794	0.368565	3.44013e-06	0.189244	0.0315868	0.363779	2.5934e-06	0.174535	0.0436377
C1_13130C	orf19.4940	orf19.4940	1.00578	1.50757e-33	0.383844	8.55223e-05	-0.623791	1.00776e-11	-0.621933	2.73795e-13	-1.62957	2.20524e-81	-1.00763	1.92038e-29
C6_03260W	orf19.5614	orf19.5614	-0.752499	6.95645e-05	-0.025976	0.947858	-0.623252	0.00148724	0.726523	0.000160341	0.129247	0.588786	-0.597276	0.00213674
C1_11480W	orf19.655	PHO84	0.852678	7.43888e-31	0.253146	0.00413215	-0.623016	2.03954e-16	-0.599532	1.35564e-15	-1.47569	3.26377e-90	-0.876162	9.85186e-32
C3_03360W	orf19.333	FCY2	-3.50636	7.67235e-267	-0.0388037	0.813998	-0.620274	1.64318e-12	3.46756	1.05066e-257	2.88609	7.13214e-177	-0.58147	5.62002e-11
C6_03320W	orf19.5620	orf19.5620	-0.652128	2.39908e-08	0.349876	0.010623	-0.619724	1.75962e-07	1.002	1.65724e-18	0.0324042	0.850376	-0.9696	3.2417e-17
C4_05840W	orf19.1270	FRE3	-0.935228	6.96585e-06	0.277479	0.328935	-0.616497	0.00530374	1.21271	3.95925e-09	0.318732	0.19703	-0.893975	2.1705e-05
C2_02930C	orf19.5812	orf19.5812	-0.443216	6.75071e-06	0.124426	0.38195	-0.616295	2.71655e-10	0.567641	5.71796e-09	-0.173079	0.116434	-0.740721	1.71675e-14
C4_02340W	orf19.2769	orf19.2769	-1.12022	3.024e-32	-0.283086	0.0143618	-0.61249	3.17265e-10	0.837136	1.0073e-17	0.507731	3.67332e-07	-0.329404	0.00156554
C3_04020C	orf19.2808	ZCF16	-0.966317	1.86182e-13	-0.341747	0.0357705	-0.611951	7.39849e-06	0.62457	1.15961e-05	0.354365	0.0162311	-0.270205	0.0851477
C2_08160C	orf19.2168.3	orf19.2168.3	-0.236535	0.000565409	-0.142118	0.0925745	-0.609912	7.47183e-21	0.0944175	0.264057	-0.373377	1.70208e-08	-0.467794	1.67448e-12
C1_08600C	orf19.407	GCD6	0.148592	0.0564524	0.186586	0.0283352	0.0194261	0.862642	0.0379942	0.740744	-0.129166	0.0976429	-0.16716	0.0307007
CR_04600W	orf19.551	orf19.551	0.015658	0.893317	0.185762	0.0349545	0.0306954	0.779551	0.170104	0.0366683	0.0150374	0.889521	-0.155066	0.0552961
C1_13110C	orf19.4937	CHS3	-0.655846	7.35965e-23	0.0536521	0.640337	-0.600869	4.63112e-19	0.709498	1.98159e-26	0.0549768	0.532185	-0.654522	2.25422e-22
C1_03560C	orf19.3059	SUA71	-0.0454088	0.659911	0.184449	0.0376551	0.121062	0.161646	0.229858	0.00313662	0.16647	0.032433	-0.0633872	0.498412
C5_02220C	orf19.4229	orf19.4229	-1.08763	1.37192e-05	-0.340852	0.334214	-0.596602	0.0271993	0.746781	0.00753422	0.491031	0.083072	-0.25575	0.426082
C4_03510C	orf19.3380	HWP2	-2.33808	0.000651523	0.78157	NA	-0.593819	0.406373	3.11965	2.56572e-06	1.74427	0.0162987	-1.37539	0.0185464
CR_00540C	orf19.7481	MDH1	-1.26599	0.0011153	-1.04734	0.0235603	-0.591899	0.175974	0.218653	0.73998	0.67409	0.116602	0.455437	0.350271
C1_10680C	orf19.1840	TCB1	-0.689193	2.75708e-26	-0.269974	0.000285468	-0.588753	3.85671e-19	0.419219	4.91639e-10	0.10044	0.198937	-0.318779	3.62218e-06
C1_07170C	orf19.4450	ZCF23	-0.488363	0.00311533	0.178371	0.451771	-0.587052	0.00053895	0.666734	4.60142e-05	-0.0986887	0.645961	-0.765423	3.58297e-06
C1_12780W	orf19.6344	RBK1	-0.363506	5.09745e-07	-0.323956	5.18454e-05	-0.58601	4.15192e-16	0.0395498	0.744347	-0.222504	0.00374534	-0.262053	0.000831862
C6_03790C	orf19.5753	HGT10	1.56404	9.10646e-25	0.0636939	0.836159	-0.584648	0.000795227	-1.50035	2.05887e-22	-2.14869	3.8174e-44	-0.648342	0.000158744
C2_05460W	orf19.3575	CDC19	-0.995926	0.00460922	0.220733	0.704827	-0.584166	0.13688	1.21666	0.000487313	0.41176	0.297236	-0.804899	0.0266589
C5_02810W	orf19.4305.1	orf19.4305.1	-1.13831	2.31394e-09	-0.125203	0.703559	-0.581891	0.00407055	1.0131	3.09361e-07	0.556416	0.00724765	-0.456688	0.0310706
C2_06690C	orf19.1225	PEX22	-0.720776	0.00051491	-0.471136	0.0656666	-0.581697	0.00804047	0.24964	0.371938	0.139079	0.603211	-0.110561	0.702563
CR_05380C	orf19.5286	YCP4	0.384575	0.00136404	-0.0582271	0.786757	-0.581132	9.83919e-07	-0.442802	0.00024701	-0.965707	1.27385e-17	-0.522905	1.24117e-05
C1_09640W	orf19.4827	ADE12	0.420004	2.42783e-08	0.0513491	0.70028	-0.578391	1.53395e-14	-0.368655	1.67794e-06	-0.998395	1.23225e-42	-0.62974	4.93379e-17
C1_12370W	orf19.5227	orf19.5227	-0.439853	3.8218e-05	-0.323403	0.0103599	-0.57719	8.90919e-08	0.11645	0.434508	-0.137337	0.279493	-0.253787	0.0369653
C2_05230C	orf19.3553	RPF2	0.399568	0.000752309	0.297182	0.0357705	-0.573219	2.30916e-06	-0.102387	0.538342	-0.972787	1.3207e-17	-0.870401	1.23927e-13
CR_02820W	orf19.2841	PGM2	-0.603658	3.31529e-13	-0.280934	0.00375561	-0.569759	1.14575e-11	0.322724	0.000276518	0.0338982	0.773284	-0.288825	0.00120086
C1_11780W	snR8a	snR8a	2.3865	2.08471e-14	1.54455	1.66183e-05	-0.568832	0.219815	-0.841958	0.00722229	-2.95533	7.93772e-19	-2.11338	2.64232e-09
CR_04060C	orf19.489	DAP1	-1.26796	4.05634e-05	0.521001	0.198283	-0.566833	0.106093	1.78896	3.08946e-09	0.701122	0.0326111	-1.08783	0.000501647
C5_02690W	orf19.4287	orf19.4287	-0.689662	3.6231e-06	-0.343763	0.0632766	-0.565971	0.000255786	0.345898	0.0425532	0.123691	0.512041	-0.222208	0.214774
C6_00330C	orf19.1193	GNP1	-0.377154	1.69343e-09	0.0719154	0.451493	-0.565041	6.56137e-20	0.44907	5.43166e-13	-0.187887	0.00461269	-0.636957	5.78315e-25
CR_09920W	orf19.7566	GNP2	-1.04178	0.00523987	-0.163949	0.801288	-0.556461	0.182749	0.877834	0.0313614	0.485323	0.255911	-0.392512	0.378933
C2_05660W	orf19.6877	PNG2	-0.61447	6.79098e-05	0.239177	0.250655	-0.554123	0.000491296	0.853648	1.69868e-08	0.060347	0.77498	-0.793301	1.93031e-07
C1_07690C	orf19.1229	orf19.1229	0.19441	0.0273921	0.0347498	0.823292	-0.550724	4.30998e-11	-0.15966	0.0974446	-0.745133	1.93496e-20	-0.585473	3.22795e-12
C3_00030C	orf19.5469	orf19.5469	-0.611575	0.00464992	0.0282509	0.948873	-0.550325	0.0156956	0.639826	0.00419973	0.0612504	0.839547	-0.578575	0.0104096
C1_12490W	orf19.3767	PEP1	-0.102698	0.114854	-0.15253	0.0286633	-0.0163265	0.857289	-0.0498321	0.55603	0.0863714	0.185343	0.136203	0.031904
C4_03570W	orf19.1321	HWP1	-14.2041	0	0.213278	0.0544624	-0.545729	1.15495e-09	14.4174	0	13.6584	0	-0.759007	4.96664e-18
C2_09710C	orf19.1381	orf19.1381	-0.447737	8.02342e-07	-0.301256	0.00445	-0.543023	3.41173e-09	0.146482	0.19994	-0.0952859	0.398404	-0.241767	0.0178059
C2_00670C	orf19.2061	orf19.2061	-1.82881	5.08016e-30	-0.094734	0.732743	-0.539972	0.00117344	1.73407	2.73746e-26	1.28883	7.50626e-15	-0.445238	0.00920822
C4_06500W	orf19.2884	CDC68	0.0884852	0.263721	-0.169021	0.0361466	-0.389762	4.19597e-09	-0.257506	0.00017823	-0.478247	1.11138e-13	-0.220741	0.00169789
CR_05980W	orf19.457	orf19.457	-0.0150686	0.882353	-0.169751	0.0235603	0.158453	0.0183307	-0.154682	0.0256617	0.173522	0.00627941	0.328204	1.47726e-07
C7_01390W	orf19.6920	orf19.6920	-1.18183	0.00120347	0.474885	0.30087	-0.537874	0.187725	1.65672	2.97804e-06	0.643958	0.114241	-1.01276	0.00461439
C3_02470C	orf19.236	RPL9B	-0.0282839	0.738504	-0.177319	0.00723919	-0.242423	3.33424e-05	-0.149035	0.0175452	-0.214139	0.000207737	-0.0651039	0.354109
CR_04960C	orf19.633	CRG1	-0.973095	1.05794e-06	0.00818975	0.981682	-0.537421	0.0124001	0.981285	1.58966e-06	0.435675	0.0493829	-0.54561	0.0109056
C1_03670C	orf19.3065	DAO1	-0.434656	1.32057e-05	-0.225675	0.0688929	-0.536187	8.89056e-08	0.208982	0.0712791	-0.101531	0.406421	-0.310512	0.00367173
C1_00210C	orf19.6082	orf19.6082	-1.17096	5.2822e-09	-0.0746921	0.841383	-0.534953	0.0131037	1.09627	1.2759e-07	0.636008	0.00323495	-0.460261	0.0382408
C2_04310W	orf19.1591	ERG10	-0.909822	1.91798e-18	0.0836876	0.637488	-0.534884	7.6272e-07	0.99351	8.13093e-22	0.374938	0.000620475	-0.618572	5.91711e-09
C7_02360W	orf19.6475	orf19.6475	-1.45466	0.0123755	0.134985	NA	-0.534454	0.427463	1.58964	0.00752842	0.920203	0.145306	-0.669439	0.290717
C3_02450W	orf19.233.1	HRT1	-0.0068577	0.949199	-0.182484	0.0215896	0.092249	0.247857	-0.175626	0.015638	0.0991067	0.179957	0.274733	5.00835e-05
CR_02900W	#N/A	#N/A	-1.80875	0.0430166	-0.596942	NA	-0.533853	0.615639	1.21181	0.253572	1.2749	0.176999	0.0630893	0.956437
C4_05960W	orf19.4406	NIF3	-0.0857016	0.375309	-0.189008	0.047671	-0.33091	3.32497e-05	-0.103306	0.302415	-0.245208	0.00215122	-0.141902	0.112897
CR_03610C	orf19.4381	VTC3	0.510777	1.47454e-08	-0.099488	0.484224	-0.533659	1.05669e-08	-0.610265	1.60023e-11	-1.04444	3.16849e-32	-0.434171	5.27659e-06
C1_03790C	orf19.1030	orf19.1030	0.405113	2.14293e-05	0.325404	0.00228443	-0.53198	2.25287e-08	-0.0797093	0.565093	-0.937093	8.29149e-25	-0.857384	1.55133e-20
C7_03390C	orf19.1336	PUP3	0.0232123	0.831392	-0.19129	0.0198291	-0.0971653	0.245083	-0.214502	0.00349981	-0.120378	0.113336	0.0941246	0.255465
C1_12590W	orf19.3757	ATP20	0.139317	0.101558	-0.191432	0.0367183	-0.169005	0.0457454	-0.33075	1.79031e-05	-0.308322	4.57235e-05	0.0224277	0.837425
C4_05780C	orf19.1264	CFL2	0.55408	2.30536e-12	-0.292665	0.00115608	-0.531532	2.63376e-11	-0.846745	1.03054e-27	-1.08561	3.80838e-45	-0.238867	0.00513312
C2_05930W	orf19.5213.2	COX9	-0.313995	1.30407e-05	-0.211201	0.0120088	-0.530496	4.54368e-14	0.102794	0.255087	-0.216501	0.00362799	-0.319295	1.25374e-05
C3_03040W	orf19.300	AIP2	-0.163058	0.0496962	-0.0980649	0.374935	-0.52443	2.96392e-12	0.064993	0.559933	-0.361372	1.93265e-06	-0.426365	2.64138e-08
C3_01600W	orf19.1683	PPH21	-0.0227086	0.819917	-0.196865	0.00815325	0.137861	0.0526806	-0.174156	0.012574	0.16057	0.0158961	0.334726	1.6425e-07
C3_02240C	orf19.1621	GPA2	-1.22303	1.24957e-71	-0.0176956	0.896882	-0.523641	5.87983e-14	1.20534	2.20245e-68	0.699392	2.42942e-23	-0.505945	6.16361e-13
CR_06150C	orf19.3870	ADE13	0.110339	0.244429	-0.198702	0.0383326	-0.469593	2.59005e-09	-0.309042	0.00016117	-0.579933	4.96542e-14	-0.270891	0.00103317
C2_06420C	orf19.20	RTS1	-0.139704	0.108478	-0.198917	0.0327073	-0.126567	0.165007	-0.0592136	0.611185	0.0131369	0.91148	0.0723505	0.462364
C7_03470W	orf19.6704	orf19.6704	-1.41181	1.69645e-10	-0.31547	0.30202	-0.522792	0.0272661	1.09634	3.5846e-06	0.889016	0.000145736	-0.207323	0.463905
C1_07710C	orf19.1233	ADE4	0.579096	2.16865e-16	-0.0920103	0.398387	-0.522595	1.05238e-12	-0.671106	2.93464e-21	-1.10169	1.00028e-55	-0.430584	8.7899e-09
C1_02840W	orf19.2972	PDE2	-0.49891	3.54573e-06	0.384145	0.00117084	-0.521828	2.10518e-06	0.883056	1.84074e-17	-0.0229177	0.889228	-0.905973	9.07539e-18
C4_07170C	orf19.3087.1	orf19.3087.1	-0.65173	0.000254296	0.157517	0.565942	-0.520784	0.00598717	0.809247	6.20669e-06	0.130946	0.570731	-0.678301	0.000219671
C4_05860W	orf19.1273	orf19.1273	0.0252099	0.832679	-0.202683	0.0275775	-0.214525	0.00883667	-0.227893	0.00538114	-0.239735	0.00200458	-0.011842	0.920133
C3_00810C	orf19.1288	FOX2	-0.729134	3.41493e-06	-0.455663	0.0152149	-0.519716	0.00173833	0.273471	0.162841	0.209418	0.262266	-0.0640533	0.779648
C1_13620W	orf19.4998	ROB1	-0.405331	1.0345e-05	-0.535814	3.61275e-08	-0.519558	1.47834e-08	-0.130484	0.26631	-0.114227	0.292449	0.0162565	0.907898
C5_02780W	orf19.4301	orf19.4301	-0.0289274	0.803186	-0.203576	0.0263122	0.108327	0.230076	-0.174649	0.0410984	0.137254	0.0926232	0.311903	5.97492e-05
C3_02320W	orf19.1613	ILV2	0.221555	0.00134693	0.344094	1.27573e-06	-0.518252	4.59695e-15	0.122538	0.120032	-0.739807	1.58582e-30	-0.862346	1.72321e-40
C7_02380C	orf19.6472	CYP1	-0.383432	1.29195e-05	-0.182221	0.0983891	-0.517279	2.37304e-09	0.201211	0.0402543	-0.133847	0.177406	-0.335058	0.000173988
C4_03390W	orf19.3366	CSH3	-0.0633419	0.556494	-0.204151	0.0383366	0.162494	0.0749313	-0.140809	0.147913	0.225836	0.00666613	0.366645	7.95723e-06
C5_01260W	orf19.1943	orf19.1943	0.600293	0.000411332	-0.846465	7.68123e-06	-0.516524	0.00488899	-1.44676	1.19978e-17	-1.11682	1.14225e-11	0.329941	0.107004
C2_10690W	orf19.5348	TPS3	-1.13846	0.0289026	-0.374145	0.636187	-0.511787	0.402076	0.764313	0.204635	0.626671	0.272122	-0.137642	0.84313
C7_00750W	orf19.7043.1	ACB1	-0.790208	0.0046593	-1.05454	0.000845728	-0.511682	0.0953774	-0.264332	0.527336	0.278526	0.40118	0.542859	0.0997826
C6_04430W	orf19.2127	CST5	-1.12816	2.50464e-24	-0.165906	0.298287	-0.510846	9.13167e-06	0.962253	4.49137e-17	0.617313	1.26689e-07	-0.34494	0.0047601
CR_07030C	orf19.2362	orf19.2362	0.454575	5.40303e-06	0.294376	0.0146731	-0.510139	1.72913e-06	-0.160198	0.187741	-0.964714	1.4999e-22	-0.804515	6.5154e-15
C5_01810W	orf19.3193	FCR3	-0.10953	0.235593	-0.207454	0.0279584	-0.0242039	0.844102	-0.0979233	0.339948	0.0853264	0.358418	0.18325	0.0333352
C5_03240W	orf19.2655	BUB3	-0.739493	1.96662e-13	-0.162789	0.254806	-0.509995	1.11391e-06	0.576704	5.27161e-08	0.229499	0.0454443	-0.347206	0.00179977
CR_06620W	orf19.697	orf19.697	0.200948	0.0475104	0.0850407	0.57825	-0.507023	1.96239e-07	-0.115907	0.34463	-0.707971	1.87064e-14	-0.592064	1.17531e-09
CR_05950C	orf19.459	ADP1	-0.0474107	0.608442	-0.210861	0.00887138	0.178519	0.0151079	-0.16345	0.0340988	0.22593	0.000946863	0.38938	1.32405e-08
C5_04680W	orf19.3954	PSD2	-1.26383	1.55737e-89	-0.0732082	0.45219	-0.501853	3.28329e-15	1.19062	2.94154e-77	0.761976	7.20574e-32	-0.428645	4.51204e-11
C2_03840C	orf19.837.1	INO4	-0.374641	0.000745055	-0.329303	0.0113851	-0.501336	7.72502e-06	0.0453382	0.813265	-0.126695	0.337083	-0.172033	0.198584
C6_02120W	orf19.3496	CHC1	-0.0857891	0.224067	-0.2111	0.00160225	0.225182	0.000242459	-0.125311	0.0681042	0.310971	9.763e-08	0.436282	7.54704e-14
C3_05220W	orf19.6000	CDR1	-0.871666	9.44422e-40	0.409438	7.88173e-09	-0.499175	1.73277e-13	1.2811	3.10425e-85	0.372491	8.05989e-08	-0.908613	3.5501e-43
C1_05530C	orf19.412	SSH1	-0.051527	0.617925	-0.212088	0.0167739	0.0857214	0.366035	-0.160561	0.0616528	0.137248	0.0959225	0.297809	0.00010321
C1_11850W	orf19.5282	orf19.5282	-1.16276	1.7344e-17	-0.167684	0.414659	-0.49888	0.000598855	0.995081	1.18535e-12	0.663885	3.14048e-06	-0.331196	0.031497
C2_10240W	orf19.1756	GPD1	0.310635	0.000641465	0.0529683	0.739951	-0.497131	4.47191e-08	-0.257667	0.00741255	-0.807766	9.6315e-21	-0.5501	1.25095e-09
C1_05410C	orf19.424	TRP99	-0.446092	1.78306e-08	-0.183345	0.0672308	-0.496517	5.78544e-10	0.262747	0.00227811	-0.0504255	0.632497	-0.313173	0.000198118
C4_02760C	orf19.2722	CGR1	-0.474568	2.08432e-09	-0.153189	0.149755	-0.495358	9.13766e-10	0.32138	0.000152541	-0.0207898	0.86281	-0.342169	5.56334e-05
C3_00980W	orf19.2501	FLC1	-0.380737	3.06374e-07	-0.0570137	0.65242	-0.494917	3.06776e-11	0.323723	2.68488e-05	-0.11418	0.186435	-0.437903	7.27892e-09
C7_03170W	orf19.5138	IFA21	-0.484651	2.3699e-09	-0.261122	0.00712304	-0.494808	2.47743e-09	0.223529	0.015989	-0.010157	0.937626	-0.233686	0.0106072
C2_04480W	orf19.4504	orf19.4504	-0.688098	1.34514e-06	-0.323988	0.0686609	-0.494105	0.000975441	0.36411	0.0236482	0.193993	0.247562	-0.170117	0.339939
C2_08100W	orf19.2175	orf19.2175	-2.81093	0	-0.262037	0.000638749	-0.493905	3.91416e-13	2.54889	3.35293e-286	2.31702	4.62467e-237	-0.231867	0.00146006
C6_00620W	orf19.4195.1	FCA1	0.500778	1.60531e-07	0.0687058	0.685981	-0.493812	9.15487e-07	-0.432072	1.20302e-05	-0.994591	3.44337e-26	-0.562518	1.81342e-08
C1_03390W	orf19.3040	EHT1	-0.65463	1.69438e-12	0.25323	0.0248683	-0.493218	2.43384e-07	0.90786	3.25289e-23	0.161412	0.132645	-0.746447	8.33079e-16
C5_04320C	orf19.3919	orf19.3919	-0.350096	0.000211068	-0.0831553	0.58102	-0.492926	1.93938e-07	0.266941	0.00891354	-0.14283	0.185693	-0.40977	2.64938e-05
C5_04520W	orf19.3937	TIP41	0.119347	0.169014	-0.217788	0.0181332	0.115583	0.201158	-0.337135	1.64157e-05	-0.00376417	0.975346	0.333371	2.29915e-05
C2_04150C	orf19.806	VMA7	-0.099464	0.243999	-0.218087	0.010563	0.234967	0.00175898	-0.118623	0.180184	0.334431	2.04534e-06	0.453054	2.6554e-10
C4_04090C	orf19.5300	orf19.5300	-0.0988638	0.331351	-0.218504	0.0330189	0.209108	0.0210156	-0.11964	0.262719	0.307972	0.000207005	0.427612	4.49161e-07
C4_06470W	orf19.2887	orf19.2887	0.433925	0.00355413	-0.0403907	0.883772	-0.491702	0.00125971	-0.474316	0.00171286	-0.925627	4.20979e-11	-0.451311	0.00322484
C1_07890C	orf19.5061	ADE5,7	0.302501	0.00016923	-0.145739	0.162419	-0.490866	4.06104e-10	-0.448239	1.20257e-08	-0.793366	1.43897e-25	-0.345127	1.84346e-05
C1_11200W	orf19.2296	orf19.2296	-1.31683	1.43427e-16	0.11658	0.676312	-0.489753	0.00523153	1.43341	1.87474e-19	0.827078	3.93891e-07	-0.606332	0.000323908
C6_02720C	orf19.5543	orf19.5543	-0.536822	4.61866e-11	-0.20007	0.0531517	-0.489441	4.99156e-09	0.336752	0.000124015	0.0473805	0.672307	-0.289372	0.00120131
C3_04550C	orf19.5911	CMK1	-0.818689	0.0225197	-0.189029	0.750348	-0.485206	0.228048	0.62966	0.120416	0.333484	0.424619	-0.296176	0.498443
C5_00010W	orf19.5700	TLO11	-0.349173	0.000166313	0.0178854	0.921454	-0.48441	1.7958e-07	0.367059	0.000109187	-0.135236	0.203264	-0.502295	7.08954e-08
C1_07590C	orf19.2786	orf19.2786	-0.160363	0.0809596	-0.221573	0.0268377	-0.0095626	0.948155	-0.0612098	0.628898	0.1508	0.0972589	0.21201	0.0186314
C1_08070W	orf19.5079	CDR4	-0.765346	3.75108e-12	0.125729	0.454009	-0.484003	2.72207e-05	0.891074	5.61799e-16	0.281343	0.0201743	-0.609731	6.42296e-08
C2_03070C	orf19.5792	SMP3	-0.0901243	0.370316	-0.222235	0.0272993	0.374961	3.4927e-06	-0.132111	0.194547	0.465085	1.92312e-09	0.597196	1.60747e-13
C4_04100C	orf19.5299	ECM1	0.338017	0.041311	0.134865	0.582463	-0.482985	0.00316017	-0.203152	0.295986	-0.821002	5.18701e-08	-0.61785	8.92982e-05
C2_04120C	orf19.809	orf19.809	0.818104	4.2499e-18	0.737196	4.89945e-13	-0.482463	6.44283e-06	-0.0809084	0.563504	-1.30057	1.27721e-41	-1.21966	8.84437e-35
C2_05730C	orf19.6884	GWT1	0.00882734	0.943847	-0.222763	0.0165834	0.197097	0.0182684	-0.23159	0.00580371	0.18827	0.0187205	0.41986	7.51904e-08
C1_01840C	orf19.4539	orf19.4539	-0.740975	7.84071e-07	-0.212649	0.3248	-0.482421	0.0025154	0.528327	0.00116226	0.258554	0.135139	-0.269772	0.128646
C6_02560W	orf19.5525	orf19.5525	-0.228562	0.00837211	-0.0756373	0.565953	-0.481128	5.54962e-09	0.152925	0.11772	-0.252566	0.00321026	-0.405491	1.37923e-06
C3_02280C	orf19.1618	GFA1	-1.29549	4.20421e-96	-0.0645519	0.527681	-0.480204	7.0346e-14	1.23094	3.8234e-86	0.81529	3.89684e-38	-0.415652	1.34833e-10
C6_03960W	orf19.5773	orf19.5773	-0.818423	3.00749e-16	-0.0666925	0.711654	-0.480172	4.4853e-06	0.751731	1.00343e-13	0.338251	0.00144674	-0.413479	8.76487e-05
C3_01140W	orf19.2516	orf19.2516	-0.451446	0.00276773	-0.494139	0.00343711	-0.47977	0.00192392	-0.0426932	0.877702	-0.0283244	0.89912	0.0143688	0.948935
C3_00820W	orf19.1289	SCT1	-0.168086	0.0219653	-0.00568062	0.966555	-0.478584	2.01908e-12	0.162405	0.0349881	-0.310498	6.70248e-06	-0.472903	5.36858e-12
C4_02890C	orf19.2707.1	QCR9	-0.257625	0.0194932	-0.0670074	0.711654	-0.47666	6.24482e-06	0.190617	0.11952	-0.219035	0.051731	-0.409652	0.00013055
C2_08490W	orf19.3629	DSE1	1.39598	3.93267e-36	0.259186	0.0825551	-0.47342	0.000148027	-1.13679	4.56288e-24	-1.8694	1.74932e-62	-0.732606	8.68481e-10
C6_04140C	orf19.4553	orf19.4553	-0.24296	0.00277337	-0.336325	9.10324e-05	-0.472876	1.48446e-09	-0.0933652	0.375591	-0.229917	0.00493604	-0.136551	0.138133
C3_02340W	orf19.1610	orf19.1610	-0.421072	0.00601513	-0.592056	0.00055929	-0.468105	0.00314639	-0.170984	0.422437	-0.0470334	0.823328	0.123951	0.551939
C2_00100C	orf19.1911	PGA52	-0.258385	0.0072144	0.194038	0.0900259	-0.467049	3.70536e-07	0.452422	8.25499e-07	-0.208664	0.0330592	-0.661087	1.38216e-13
C1_10820C	orf19.2335	orf19.2335	-0.378217	6.28597e-07	-0.0794633	0.502368	-0.465812	1.28248e-09	0.298754	0.000189743	-0.0875955	0.344324	-0.386349	9.52845e-07
C2_04300C	orf19.1592	orf19.1592	-0.527252	8.12113e-07	0.0706288	0.705563	-0.465478	2.44757e-05	0.597881	2.66348e-08	0.061774	0.665924	-0.536107	8.58772e-07
C6_01070C	orf19.113	CIP1	-3.34161	4.69357e-83	-0.23635	0.30087	-0.465194	0.00738469	3.10526	1.35326e-70	2.87642	7.88893e-61	-0.228844	0.236258
C4_03090W	orf19.2682	orf19.2682	0.0160486	0.906313	-0.232781	0.0211555	0.00240988	0.986903	-0.24883	0.00598361	-0.0136387	0.914721	0.235191	0.0091983
CR_01270C	orf19.3227	FTH2	-0.0499001	0.65994	-0.233494	0.0166975	-0.127888	0.186799	-0.183594	0.0485734	-0.0779878	0.427625	0.105606	0.291685
C6_00300C	orf19.1190	STV1	-0.111643	0.204447	-0.235358	0.00665922	0.4214	1.22262e-08	-0.123715	0.174238	0.533043	1.33993e-13	0.656758	1.39232e-19
C2_01020W	orf19.2020	HGT6	-4.69985	0	0.265459	0.00810437	-0.464278	8.57762e-08	4.96531	0	4.23558	0	-0.729737	3.76583e-18
C5_03250W	orf19.2654	RMS1	0.537099	1.21998e-05	0.560749	2.38573e-05	-0.463949	0.00043295	0.0236502	0.922327	-1.00105	7.44325e-17	-1.0247	5.36769e-17
C1_00840C	orf19.6022	NRM1	0.123584	0.224209	-0.237886	0.0215287	-0.0051968	0.973458	-0.361469	4.44572e-05	-0.12878	0.185971	0.232689	0.0123034
C2_06020W	orf19.4118	CNT	-0.23747	0.00400592	-0.0396905	0.783976	-0.461375	4.37777e-09	0.19778	0.0237114	-0.223905	0.00658292	-0.421685	9.12064e-08
C2_10170C	orf19.1764	orf19.1764	0.0249497	0.836173	-0.238975	0.0081551	0.029368	0.802013	-0.263925	0.00118978	0.00441823	0.969949	0.268343	0.000898171
C1_08530W	orf19.398	orf19.398	-0.886131	0.00167819	-0.351596	0.374706	-0.460177	0.148947	0.534534	0.102278	0.425953	0.175616	-0.108581	0.780775
C3_04910C	orf19.5960	NCE102	-0.889852	5.76181e-06	-0.101493	0.773535	-0.460106	0.0327132	0.788359	0.000112947	0.429746	0.0446466	-0.358614	0.109121
C1_04480C	orf19.6842	TUS1	-0.548007	5.83822e-11	0.0730752	0.596846	-0.457631	1.14785e-07	0.621082	1.63309e-13	0.0903761	0.391388	-0.530706	6.44373e-10
C6_02190C	orf19.3459	orf19.3459	-0.0851467	0.452898	-0.242816	0.0221675	0.361613	5.50531e-05	-0.157669	0.136909	0.44676	2.1124e-07	0.604429	3.505e-12
C1_05300C	orf19.434	PRD1	-0.382806	2.38872e-06	-0.156925	0.137384	-0.455792	2.10254e-08	0.225881	0.011074	-0.0729856	0.469947	-0.298867	0.000422242
C2_02090W	orf19.1525	orf19.1525	-0.0178614	0.896035	-0.243919	0.0176234	-0.137427	0.176703	-0.226057	0.0172477	-0.119566	0.221467	0.106492	0.315679
C2_01110C	orf19.2014	BCY1	-0.0511963	0.571639	-0.243962	0.00116758	-0.0152669	0.889845	-0.192766	0.00810599	0.0359294	0.686635	0.228695	0.00110401
C2_03910C	orf19.834	orf19.834	0.0655603	0.58602	-0.243974	0.0262236	0.292234	0.00180021	-0.309534	0.00119056	0.226674	0.0143205	0.536208	2.54836e-09
C1_12320C	orf19.5231.2	ATP19	0.113154	0.203864	-0.245299	0.00485785	-0.202308	0.0142605	-0.358454	3.06933e-06	-0.315462	3.17845e-05	0.0429915	0.677022
C5_02590C	orf19.4273	orf19.4273	0.675593	3.45604e-07	0.333885	0.0468407	-0.455375	0.00233372	-0.341708	0.0199116	-1.13097	1.11508e-17	-0.78926	1.89461e-08
C1_09610W	orf19.4824	orf19.4824	0.299394	0.0063909	0.0577845	0.76899	-0.454719	5.2512e-05	-0.24161	0.0429722	-0.754113	4.51775e-13	-0.512503	4.73501e-06
C3_02410C	orf19.229	orf19.229	-0.00146768	0.990814	-0.246823	0.0307455	-0.0368239	0.793536	-0.245355	0.0177651	-0.0353562	0.778913	0.209999	0.04558
C2_04490W	orf19.4503	orf19.4503	-0.0652297	0.382862	-0.246888	0.000158583	0.0172915	0.853914	-0.181658	0.00459923	0.0825212	0.230267	0.264179	1.32995e-05
C7_02540W	orf19.6456	orf19.6456	-0.866354	1.06735e-13	-0.143145	0.416986	-0.453234	0.000245917	0.723209	1.67275e-09	0.41312	0.00084056	-0.310089	0.0168718
C2_09880C	orf19.1363	orf19.1363	-1.1927	0.00809453	1.13588	0.0213475	-0.451308	0.406201	2.32858	3.12831e-08	0.741389	0.121984	-1.58719	0.000210778
C1_04700C	orf19.775	orf19.775	-1.14233	2.70928e-14	-0.0449128	0.876909	-0.449555	0.00571321	1.09741	6.22769e-13	0.69277	9.06098e-06	-0.404642	0.013909
C5_01610W	orf19.6297	orf19.6297	0.292685	0.0176929	0.263422	0.0746884	-0.448564	0.000405286	-0.0292627	0.894382	-0.741249	1.75806e-10	-0.711986	4.29006e-09
C1_13180W	orf19.4946	orf19.4946	1.14604	0.0492806	0.815811	NA	-0.446289	0.586524	-0.330233	0.67755	-1.59233	0.00614464	-1.2621	0.0498749
C5_03940C	orf19.3218	orf19.3218	-0.505852	3.56894e-06	0.191626	0.185266	-0.445886	8.74016e-05	0.697478	1.09501e-10	0.0599657	0.686635	-0.637512	7.28644e-09
C4_02990C	orf19.2693	GST2	-0.376754	0.029235	-0.0382631	0.9044	-0.444569	0.0123572	0.338491	0.0730706	-0.0678145	0.76408	-0.406306	0.0256604
CR_07200W	orf19.6152	orf19.6152	0.66143	3.78302e-11	0.535625	1.06491e-06	-0.444325	4.31385e-05	-0.125805	0.343938	-1.10575	9.62434e-29	-0.97995	6.76274e-22
C1_03400W	orf19.3041	orf19.3041	-0.268511	0.0051384	0.159279	0.197186	-0.443309	2.55891e-06	0.427791	4.41555e-06	-0.174798	0.0889528	-0.602589	6.73613e-11
C1_01790W	orf19.4545	SWI4	0.290108	0.000400571	-0.0421504	0.776946	-0.443002	7.85752e-08	-0.332259	6.48257e-05	-0.73311	7.08351e-21	-0.400852	1.73229e-06
C1_12730W	orf19.6349	RVS162	-0.331844	0.0254176	-0.0126573	0.964035	-0.438851	0.0033326	0.319187	0.043578	-0.107006	0.549498	-0.426193	0.00479677
C5_01960C	orf19.3175	orf19.3175	0.535454	9.64392e-09	0.722056	7.65227e-14	-0.437696	9.43588e-06	0.186602	0.0862576	-0.97315	2.81644e-26	-1.15975	3.19361e-36
C2_04460W	orf19.4506	LYS22	0.959749	1.20857e-24	1.24745	9.17333e-39	-0.435838	2.89707e-05	0.287697	0.00483848	-1.39559	1.82413e-49	-1.68328	1.08954e-70
C6_00850W	orf19.86	orf19.86	-0.578762	2.66834e-11	0.00810955	0.963466	-0.435444	1.3211e-06	0.586871	2.70353e-11	0.143318	0.158553	-0.443554	8.78736e-07
C7_03540C	orf19.6686	ENP2	0.836742	4.69735e-12	0.725955	5.113e-08	-0.434591	0.00206765	-0.110786	0.525133	-1.27133	3.44758e-25	-1.16055	6.11171e-20
C1_01720C	snR5a	snR5a	-0.129794	0.30721	-0.256932	0.044377	0.157927	0.206441	-0.127137	0.357675	0.287722	0.00802982	0.414859	0.000105719
C4_03600C	orf19.1314	orf19.1314	-0.0687619	0.623133	-0.257336	0.0456787	-0.248754	0.0296154	-0.188574	0.12958	-0.179992	0.114323	0.00858213	0.955814
C1_01530C	orf19.3341	orf19.3341	0.608102	5.32293e-20	0.289923	0.000154825	-0.433188	8.89897e-10	-0.318179	5.33075e-06	-1.04129	2.34944e-55	-0.723111	8.37701e-26
CR_02650C	orf19.2825	DRE2	0.355409	0.000648377	-0.0010744	0.995466	-0.429097	5.33419e-05	-0.356483	0.000862774	-0.784506	2.6186e-15	-0.428023	5.47338e-05
CR_03150W	orf19.2410	SYS3	-0.0730782	0.473052	-0.257473	0.00500408	-0.397315	7.2021e-07	-0.184395	0.0397069	-0.324237	4.53689e-05	-0.139842	0.133324
C4_07160W	orf19.3087.2	orf19.3087.2	-0.371397	0.0194932	-0.0997653	0.705563	-0.428349	0.0087503	0.271631	0.134595	-0.0569524	0.786587	-0.328584	0.0569739
CR_05180C	orf19.637	SDH2	-0.452154	0.0319234	0.181078	0.558549	-0.42761	0.0548286	0.633232	0.0022836	0.0245446	0.936795	-0.608688	0.00374806
CR_09680C	orf19.6595	RTA4	-4.17374	0.0568765	-0.345538	NA	-2.89134	NA	3.8282	0.10782	1.2824	0.670703	-2.5458	0.297918
C5_03900W	orf19.1105.2	PGA56	-1.27966	8.87278e-103	0.191332	0.00874613	-0.426575	5.42978e-12	1.47099	1.30929e-135	0.853082	5.9253e-46	-0.617908	2.36037e-24
C4_01200C	orf19.4669	AAT22	0.35075	0.00543163	-0.20288	0.232703	-0.426028	0.00102899	-0.55363	8.5754e-06	-0.776778	6.88523e-11	-0.223148	0.120839
C2_03880C	orf19.836.1	orf19.836.1	0.346818	0.0406502	0.103239	0.713593	-0.425372	0.0163093	-0.243579	0.205715	-0.77219	9.40256e-07	-0.528611	0.00203204
CR_03720W	orf19.4371	TAL1	-0.394357	1.20102e-05	-0.024017	0.889945	-0.418103	3.96661e-06	0.37034	5.37044e-05	-0.0237462	0.854697	-0.394086	1.32142e-05
C2_00510W	orf19.2076	orf19.2076	-2.40231	8.66912e-38	-0.388938	0.0663311	-0.416964	0.0240663	2.01337	3.31005e-25	1.98534	2.73403e-25	-0.0280267	0.915763
CR_05080W	orf19.645.1	VMA13	-0.052498	0.571115	-0.261141	0.000792296	-0.187321	0.0128361	-0.208643	0.0054423	-0.134823	0.0745358	0.0738201	0.402353
C2_05580W	orf19.6871	orf19.6871	-1.01902	2.26158e-26	0.0971611	0.522743	-0.416853	3.62614e-05	1.11618	6.98792e-31	0.602168	1.5111e-09	-0.514014	2.24871e-07
C1_06100C	orf19.2435	MSI3	0.198043	0.00907676	0.168417	0.0576491	-0.416473	7.46078e-09	-0.029626	0.809097	-0.614516	9.39851e-19	-0.58489	1.08597e-16
C6_00800C	orf19.3644	orf19.3644	-0.546742	6.0782e-15	0.123056	0.204174	-0.415258	9.11212e-09	0.669797	1.04885e-21	0.131484	0.105516	-0.538313	4.53044e-14
C7_00630C	orf19.7056	orf19.7056	-3.93487	0.067621	0.891007	NA	-3.61427	NA	4.82588	0.0221403	0	1	-4.50527	0.0300712
C6_01170W	orf19.124	CIC1	0.606845	2.28903e-12	0.444144	3.18754e-06	-0.41429	7.84124e-06	-0.162701	0.11896	-1.02114	1.01173e-32	-0.858435	1.56389e-22
C5_01290C	orf19.1940	orf19.1940	-0.740661	9.58221e-12	0.215826	0.129933	-0.412081	0.00036132	0.956487	5.87464e-19	0.32858	0.00451826	-0.627907	1.22384e-08
C6_03760C	orf19.5750	SHM2	0.117434	0.165817	-0.263585	0.00117573	-0.684642	2.98689e-22	-0.381018	1.84512e-07	-0.802076	1.48816e-30	-0.421057	6.34251e-09
C1_08990C	orf19.4755	KEX2	-1.02238	6.63494e-25	-0.161873	0.247864	-0.412081	7.8862e-05	0.860511	5.23404e-17	0.610304	3.69652e-09	-0.250208	0.0267301
C2_07420W	orf19.1889	orf19.1889	-0.500517	3.28346e-15	-0.200784	0.00886171	-0.411935	2.48323e-10	0.299733	9.12119e-06	0.0885817	0.249538	-0.211151	0.00254576
C6_00290W	orf19.1189	orf19.1189	-1.19693	2.63272e-40	-0.00789808	0.965467	-0.411504	1.47354e-05	1.18904	3.92329e-39	0.78543	1.5386e-17	-0.403606	2.21053e-05
CR_06270W	orf19.3879	orf19.3879	-0.545638	0.000321723	-0.142655	0.549151	-0.411155	0.0112648	0.402983	0.0158301	0.134483	0.473495	-0.2685	0.127371
C1_04640W	orf19.782	orf19.782	0.111606	0.323815	-0.264857	0.0184835	-0.0868932	0.480701	-0.376463	0.000102923	-0.198499	0.0464393	0.177963	0.0985068
C3_02560W	orf19.245	DDC1	0.207522	0.0667664	-0.266588	0.0456787	-0.0269073	0.871872	-0.47411	1.30316e-05	-0.23443	0.0321153	0.23968	0.0475818
CR_01320C	orf19.3222	orf19.3222	0.437911	6.80871e-07	0.103574	0.451771	-0.408938	1.45903e-05	-0.334338	0.000316243	-0.846849	1.79952e-22	-0.512511	3.60268e-08
C2_10260C	orf19.1754	CMK2	-0.508812	3.17426e-06	0.0259929	0.903307	-0.40794	0.000377211	0.534805	1.75235e-06	0.100872	0.463401	-0.433933	0.000154159
C3_04170W	orf19.5860	orf19.5860	-0.784039	0.000305858	-0.219118	0.504713	-0.405178	0.0953435	0.564921	0.0199134	0.378861	0.118944	-0.18606	0.507286
CR_02410W	orf19.3726	orf19.3726	-0.229463	0.0243251	-0.205669	0.0930408	-0.405126	4.24472e-05	0.0237941	0.897918	-0.175662	0.0999235	-0.199456	0.071261
C1_09380W	orf19.4800	RIM20	-0.291762	0.0205848	-0.320168	0.0263904	-0.40493	0.00121698	-0.0284065	0.902479	-0.113169	0.437916	-0.0847621	0.601629
C6_02750C	orf19.5548	LYS14	-0.72479	0.0257496	-0.393225	0.379926	-0.403354	0.275661	0.331565	0.446473	0.321436	0.390196	-0.0101294	0.981952
C2_06600W	orf19.35	SKY2	0.279675	0.0228635	-0.0983213	0.599653	-0.403037	0.000874407	-0.377996	0.00183697	-0.682712	1.3457e-09	-0.304716	0.0145466
C1_13400C	orf19.4966	AGC1	0.0880308	0.47675	-0.267545	0.0201045	-0.16633	0.139087	-0.355576	0.000382164	-0.254361	0.0107851	0.101215	0.404938
CR_04170W	orf19.501	orf19.501	0.432486	2.98185e-07	0.399892	1.08488e-05	-0.398363	4.36329e-06	-0.032594	0.825986	-0.83085	2.64316e-24	-0.798256	4.17663e-22
C1_04200C	orf19.1054	orf19.1054	-0.48834	3.09268e-12	-0.317204	5.01456e-05	-0.396736	3.40769e-08	0.171135	0.0359227	0.0916034	0.279318	-0.0795321	0.378933
C1_10320W	orf19.4903	orf19.4903	-0.569004	6.56479e-08	-0.404664	0.00077963	-0.395374	0.000374242	0.164339	0.228701	0.173629	0.154887	0.00928999	0.953435
C1_03100W	orf19.3003	TCB3	-0.956812	1.62591e-51	-0.287624	6.56616e-05	-0.3944	2.4119e-09	0.669188	2.75634e-25	0.562412	3.052e-18	-0.106776	0.168675
C1_08570C	orf19.403	PCL2	-0.307468	0.0472419	-0.806216	1.88107e-07	-0.394363	0.010585	-0.498747	0.00126802	-0.0868942	0.639993	0.411853	0.00909709
C2_02740C	orf19.5832	HPT1	0.205693	0.0065901	0.232367	0.00518206	-0.393891	7.39964e-08	0.0266742	0.832794	-0.599584	1.1253e-17	-0.626258	1.29499e-18
C6_00440C	orf19.4215	FET34	-1.23583	5.53097e-93	-0.184141	0.0141236	-0.391835	5.88602e-10	1.05169	2.19241e-67	0.843992	1.24685e-43	-0.207694	0.00181463
C4_00050W	orf19.371	orf19.371	0.0130411	0.909658	-0.269597	0.000546458	0.112376	0.171131	-0.282638	9.23503e-05	0.0993349	0.207316	0.381973	5.2086e-08
C2_06880C	orf19.2242	PRB1	-0.556224	1.33729e-10	-0.352398	0.000363763	-0.391627	1.49213e-05	0.203826	0.0470486	0.164597	0.0967174	-0.0392287	0.757751
C1_13220C	orf19.4950	AKR1	0.0183036	0.912205	-0.270476	0.0300311	0.0958567	0.465391	-0.288779	0.00949768	0.0775531	0.533924	0.366332	0.000617086
C5_02860C	orf19.4309	GRP2	-2.24541	7.81272e-184	0.0391502	0.791312	-0.391099	1.4635e-06	2.28456	2.68792e-189	1.85431	1.4474e-124	-0.430249	8.1478e-08
C2_02410W	orf19.1564	orf19.1564	-0.839607	8.42984e-35	-0.306308	8.22479e-05	-0.390688	3.715e-08	0.533299	7.31959e-14	0.448918	2.28672e-10	-0.0843801	0.34271
C2_01350C	orf19.1990	SNX4	-0.131536	0.182961	-0.270966	0.00760535	0.267513	0.0026329	-0.13943	0.189544	0.399048	1.48614e-06	0.538478	3.30212e-10
C5_02560C	orf19.4269	orf19.4269	-0.387609	0.000113183	-0.376934	0.000641344	-0.390392	0.000139369	0.010675	0.961417	-0.00278269	0.985004	-0.0134577	0.930768
C1_08380W	orf19.382	TEF2	0.161843	0.0336878	0.169724	0.0468407	-0.390227	2.41968e-08	0.00788146	0.959592	-0.55207	3.90959e-16	-0.559951	2.21824e-16
C3_05050W	orf19.5975	TRY4	-3.50636	NA	-1.88103	NA	-2.22396	NA	1.62533	0.744521	1.2824	0.758977	-0.34293	NA
C2_07820C	orf19.2199	PHO86	0.0543359	0.613125	-0.272739	0.00314613	-0.0234264	0.850699	-0.327075	7.91198e-05	-0.0777622	0.413276	0.249313	0.00370566
CR_01300W	orf19.3223.1	orf19.3223.1	0.255777	0.0203031	0.0488219	0.801889	-0.389997	0.000361379	-0.206955	0.0849591	-0.645774	2.06793e-10	-0.438819	4.68763e-05
C2_06850W	orf19.2237.1	orf19.2237.1	0.410041	0.00399993	0.269722	0.140059	-0.389549	0.0127661	-0.140319	0.459339	-0.79959	5.79622e-09	-0.659271	6.26112e-06
C2_03360W	orf19.891	orf19.891	-0.441735	5.10348e-09	-0.0624882	0.62016	-0.388395	5.65738e-07	0.379246	1.19499e-06	0.0533392	0.591137	-0.325907	3.91164e-05
C4_06380W	orf19.2897	SOU2	-3.47606	0.0830752	0.647084	NA	-2.30058	NA	4.12314	0.0390044	1.17548	0.661156	-2.94767	0.121864
C1_09060C	orf19.4763	orf19.4763	-1.41646	0.0349122	0.0650324	NA	-0.387913	0.630713	1.48149	0.0344745	1.02855	0.148054	-0.452946	0.554516
C1_07530W	orf19.2800	orf19.2800	-1.0576	0.00194116	-0.530943	0.244147	-0.386905	0.334322	0.526661	0.220821	0.670699	0.0678135	0.144038	0.759839
C1_09040C	orf19.4760	orf19.4760	0.272927	0.0310641	0.338649	0.0155781	-0.386575	0.0026183	0.0657221	0.727182	-0.659502	1.7911e-08	-0.725224	1.47086e-09
C2_05820W	orf19.5205	orf19.5205	-0.496021	0.0245788	0.280073	0.33637	-0.383644	0.108554	0.776094	0.000262208	0.112377	0.686187	-0.663717	0.00218251
C1_03820W	orf19.1027	PDR16	0.607693	1.3888e-07	-0.390801	0.0062039	-0.383026	0.00299529	-0.998494	1.57287e-17	-0.990719	4.34595e-18	0.00777498	0.965907
C3_07470W	orf19.6741	EVP1	-0.809877	0.00255977	0.135533	0.766325	-0.380153	0.217166	0.94541	0.000501164	0.429723	0.148533	-0.515686	0.0742545
C7_02500C	orf19.6459	DPP3	-1.5542	4.86612e-70	-0.169538	0.152797	-0.379785	4.21927e-05	1.38466	1.33637e-54	1.17442	1.08152e-39	-0.210247	0.0353484
C5_05340W	orf19.4029	orf19.4029	0.316835	0.000115481	0.499416	5.07012e-09	-0.378991	1.03887e-05	0.182581	0.0434802	-0.695826	2.5099e-18	-0.878407	1.57668e-27
C1_12620W	orf19.6362	SPA2	0.322017	9.15041e-07	0.0440753	0.705418	-0.377197	1.60395e-08	-0.277942	4.01483e-05	-0.699214	3.41968e-28	-0.421272	2.31947e-10
C1_06670W	orf19.6244	orf19.6244	-0.362395	0.000216527	-0.0699452	0.670669	-0.376913	0.00017142	0.29245	0.0050482	-0.0145175	0.923434	-0.306968	0.00288642
CR_02850C	orf19.2842	GZF3	0.317919	0.000958533	-0.0165809	0.931852	-0.376797	0.000118414	-0.3345	0.000659658	-0.694716	2.75581e-14	-0.360216	0.000237153
C4_01490W	orf19.4635	NIP1	0.527088	1.36349e-13	0.0731017	0.527904	-0.375848	5.14356e-07	-0.453987	3.83733e-10	-0.902936	7.87457e-38	-0.44895	1.18962e-09
CR_05520W	orf19.5850	NOC2	0.286137	0.0380066	0.391841	0.00807642	-0.374697	0.0069854	0.105704	0.568567	-0.660834	1.69345e-07	-0.766539	1.95428e-09
CR_01930C	orf19.2593	BIO2	-0.865198	0.0143358	0.206919	0.716687	-0.37464	0.369166	1.07212	0.00235022	0.490558	0.202708	-0.581558	0.122416
C2_03140C	orf19.5782	orf19.5782	-0.213929	0.00853864	-0.0883881	0.451771	-0.374499	2.1658e-06	0.125541	0.187585	-0.16057	0.0584424	-0.286111	0.00047819
C2_09010W	orf19.203	STB3	-0.524946	1.70004e-06	-0.288487	0.030664	-0.373387	0.00126324	0.236459	0.0658312	0.151559	0.238504	-0.0848999	0.563471
C1_10390C	orf19.4909.1	RPL42	0.191335	0.00524987	0.06137	0.554107	-0.371164	1.15846e-08	-0.129965	0.0864523	-0.562498	3.88898e-19	-0.432534	1.53186e-11
C1_13500C	snR3a	snR3a	2.44468	6.49191e-30	1.60501	3.93145e-11	-0.37083	0.262707	-0.83967	3.44024e-05	-2.81551	2.48937e-35	-1.97584	3.06068e-16
C1_06700W	orf19.6240	orf19.6240	-0.321298	0.000129586	-0.239924	0.0144014	-0.370724	1.15812e-05	0.0813741	0.490767	-0.0494259	0.649647	-0.1308	0.182058
C2_08840W	orf19.3585	orf19.3585	0.538964	0.0213944	0.345154	0.280214	-0.370174	0.189655	-0.193809	0.537339	-0.909137	6.13907e-05	-0.715328	0.00401356
C6_02870W	orf19.5563	RNH1	-0.623219	2.33669e-07	-0.39697	0.00437451	-0.368805	0.00430285	0.226249	0.119274	0.254415	0.0545235	0.0281655	0.876766
C1_12740W	orf19.6348	orf19.6348	-0.440234	6.81623e-05	-0.0456644	0.823292	-0.368337	0.0014549	0.39457	0.000631002	0.0718976	0.614125	-0.322672	0.00620699
C1_01270W	orf19.3315	CTA9	-0.230058	0.0123158	-0.125705	0.314473	-0.367441	4.31482e-05	0.104354	0.370536	-0.137383	0.165872	-0.241737	0.0110206
C5_00760W	orf19.578	orf19.578	-0.182324	0.109383	-0.275397	0.0278988	-0.0606321	0.673887	-0.093073	0.534665	0.121692	0.30483	0.214765	0.066077
C1_11020W	orf19.2312	orf19.2312	0.442499	0.000108866	0.208689	0.177001	-0.36556	0.00362165	-0.233809	0.0736052	-0.808058	4.87405e-13	-0.574249	1.50798e-06
C1_05920W	orf19.2457	orf19.2457	-2.09883	8.65352e-193	0.22526	0.00508873	-0.36317	3.22297e-07	2.32409	5.38208e-235	1.73566	1.11461e-129	-0.588429	1.28671e-17
C6_02610C	orf19.5531	CDC37	-0.400806	1.8976e-10	0.107826	0.215021	-0.362468	1.71788e-08	0.508633	4.33443e-16	0.0383384	0.650341	-0.470294	1.12776e-13
CR_01520W	orf19.2538	PTC2	0.22763	0.00103974	0.0813657	0.418937	-0.362393	1.13753e-07	-0.146264	0.057553	-0.590023	1.52619e-19	-0.443758	4.56863e-11
C2_10270W	orf19.1753	PUS7	0.369983	0.000166313	0.250873	0.0326009	-0.362133	0.000408169	-0.11911	0.34655	-0.732116	8.71689e-15	-0.613006	2.90964e-10
C1_10700C	orf19.2351	NIT3	0.564857	3.10729e-05	0.207994	0.280214	-0.36192	0.0174827	-0.356863	0.0157189	-0.926777	2.87434e-12	-0.569914	6.40629e-05
CR_05660W	orf19.6648	SDA1	0.373513	4.0943e-05	0.373153	0.000179056	-0.361625	0.000156489	-0.000360317	0.99872	-0.735138	7.05944e-17	-0.734778	3.19354e-16
CR_09530C	orf19.6608	orf19.6608	-2.54674	5.56426e-13	0.311978	0.52902	-0.360184	0.379107	2.85872	4.5281e-16	2.18656	1.03204e-09	-0.672162	0.0592022
CR_03230W	orf19.2400	orf19.2400	0.56517	0.000110697	0.0534153	0.853436	-0.358347	0.0377773	-0.511755	0.000928228	-0.923517	1.94837e-10	-0.411762	0.0152723
C2_04700C	orf19.154	orf19.154	0.483142	5.81486e-06	0.407793	0.000752009	-0.35833	0.0025871	-0.0753491	0.641153	-0.841472	1.33225e-15	-0.766123	2.91157e-12
C1_04400C	orf19.5197	APE2	-0.278043	1.72491e-05	-0.177496	0.0203585	-0.356734	2.77846e-08	0.100547	0.20335	-0.0786911	0.29945	-0.179238	0.00916546
C2_02200W	orf19.1536	ZRC1	-0.803783	1.28328e-42	-0.217071	0.00167576	-0.355521	6.09287e-09	0.586712	1.96507e-22	0.448262	1.20511e-13	-0.13845	0.0430594
CR_07610C	orf19.6288	orf19.6288	1.50685	0.00116854	1.07892	NA	-0.35551	0.613809	-0.427929	0.467703	-1.86235	7.59599e-05	-1.43443	0.00516534
C1_12240C	orf19.5239	orf19.5239	-0.259126	0.0108374	-0.125339	0.379926	-0.35531	0.000485076	0.133787	0.284865	-0.0961846	0.419118	-0.229971	0.0358408
C2_00680C	orf19.2060	SOD5	-2.26961	7.61964e-192	-0.00728945	0.964332	-0.355107	1.8775e-05	2.26232	2.23587e-190	1.9145	2.29417e-136	-0.347818	2.45251e-05
C6_04160C	orf19.76	SPB1	0.451558	3.61967e-08	0.455382	2.14792e-07	-0.353107	4.28564e-05	0.00382336	0.984558	-0.804665	8.9919e-24	-0.808488	2.11814e-23
C1_00040W	orf19.6112	CTA2	-0.321188	0.000146019	-0.0275274	0.861073	-0.353013	3.34091e-05	0.29366	0.000736677	-0.0318252	0.781948	-0.325486	0.000129281
C1_11420W	orf19.661	KRR1	0.558678	2.37706e-10	0.454932	2.26182e-06	-0.352872	0.000207292	-0.103747	0.385879	-0.911551	9.74214e-26	-0.807804	8.80891e-20
C1_01640W	orf19.3354	RPS42	0.614302	7.41445e-09	-0.00347777	0.984927	-0.350828	0.00347134	-0.617779	1.44075e-08	-0.96513	6.46553e-20	-0.34735	0.00404502
C5_04690C	orf19.3954.1	orf19.3954.1	1.14374	0.000222598	-0.293501	0.598154	-0.350721	0.417714	-1.43724	1.25435e-05	-1.49446	1.65056e-06	-0.0572196	0.914861
C2_09980W	orf19.1785	orf19.1785	-0.502185	4.71693e-06	0.0227568	0.914757	-0.349987	0.00256123	0.524942	2.24775e-06	0.152198	0.231278	-0.372744	0.00110829
C1_10170W	orf19.4886	orf19.4886	-3.14412	0.166633	0.696615	NA	1.27225	NA	3.84073	0.0847148	4.41637	0.0259018	0.575637	0.790215
C6_04330W	orf19.1091	NOP8	0.605816	4.01129e-06	0.300248	0.0672308	-0.3497	0.0164053	-0.305567	0.0378302	-0.955515	9.05905e-14	-0.649948	1.21356e-06
C3_02720W	orf19.264	orf19.264	-1.17515	2.586e-29	-0.126018	0.425978	-0.348734	0.00189681	1.04913	1.12564e-22	0.826419	1.39588e-14	-0.222715	0.0647241
C1_04100C	orf19.1042	POR1	-0.366581	1.11785e-06	-0.164458	0.0805488	-0.348485	5.15567e-06	0.202123	0.0142118	0.0180954	0.87022	-0.184027	0.0242569
C3_04350C	orf19.5879	orf19.5879	-0.444248	0.00512873	0.115054	0.651557	-0.346991	0.0419846	0.559302	0.000443164	0.0972571	0.626155	-0.462045	0.00457836
C4_06360C	orf19.2899	orf19.2899	-3.14067	NA	-1.51534	NA	-0.454027	NA	1.62533	0.699349	2.68664	0.377929	1.06131	NA
C2_07670C	orf19.2215	GLE1	0.245781	0.0372148	0.116733	0.499443	-0.346465	0.0041482	-0.129047	0.376822	-0.592246	5.90366e-08	-0.463198	7.70545e-05
C3_07440W	orf19.6745	TPI1	-1.22252	4.06789e-11	-0.0138544	0.969278	-0.346205	0.105921	1.20866	1.2223e-10	0.876312	3.91974e-06	-0.33235	0.118681
C2_01390W	orf19.1444	ENT2	-0.316387	0.00561448	-0.212178	0.144981	-0.345863	0.00322265	0.104209	0.516303	-0.0294755	0.854468	-0.133684	0.337391
C1_06310W	snR44a	snR44a	2.86785	0.00129834	2.48251	NA	-0.345288	0.831863	-0.385341	0.746717	-3.21314	0.000485424	-2.8278	0.00350841
C6_03020W	orf19.5584	PEP3	-0.539954	2.03155e-10	-0.306503	0.00208533	-0.345253	0.000119884	0.233452	0.0179304	0.194701	0.0399467	-0.0387507	0.758057
C1_08590C	orf19.406	ERG1	-0.795319	0.0266773	0.501848	0.277283	-0.344985	0.420794	1.29717	0.000151445	0.450334	0.241983	-0.846832	0.0173727
CR_02560C	orf19.166	ASG1	0.426739	1.8553e-08	0.160196	0.115184	-0.344572	2.89707e-05	-0.266543	0.00106432	-0.771311	1.06099e-24	-0.504768	3.1139e-10
CR_08830W	orf19.7279.1	orf19.7279.1	-3.11421	NA	-0.0301387	NA	-1.83181	NA	3.08407	0.378659	1.2824	0.731948	-1.80167	NA
C1_10500W	orf19.993	orf19.993	-0.485779	0.000267327	-0.0695396	0.769756	-0.344425	0.015775	0.416239	0.0029188	0.141354	0.372043	-0.274885	0.0608186
C5_03960W	orf19.3215	orf19.3215	-0.332135	0.003036	0.00607817	0.976858	-0.344281	0.00256587	0.338213	0.00320666	-0.0121465	0.941104	-0.35036	0.0019232
C2_06740W	orf19.3148	orf19.3148	-0.225465	0.0218882	-0.202529	0.0855688	-0.34333	0.000391638	0.0229357	0.89814	-0.117866	0.278185	-0.140801	0.209323
C3_04480C	orf19.5902	RAS2	-3.11374	NA	-0.00724161	NA	-2.79314	NA	3.1065	0.384889	0	1	-2.78589	NA
C2_02590W	orf19.1585	ZRT2	-0.527374	3.6622e-14	0.234813	0.00380574	-0.342699	2.30703e-06	0.762187	1.45763e-28	0.184675	0.0151702	-0.577512	1.37396e-16
C1_04240C	orf19.1059	HHF1	0.260016	1.68502e-05	-0.119962	0.118744	-0.342344	1.07379e-08	-0.379978	1.32987e-10	-0.60236	1.20067e-25	-0.222382	0.000325071
C7_02830C	orf19.5179	LIP5	-0.537427	0.0131096	-0.404772	0.135019	-0.340033	0.160208	0.132655	0.690848	0.197394	0.434985	0.0647394	0.832264
C2_02010C	orf19.1515	CHT4	-0.403068	0.000965017	-0.305368	0.0394971	-0.338319	0.00894749	0.0977003	0.594906	0.0647495	0.686765	-0.0329508	0.855594
C5_01480W	orf19.4143	FYV5	0.270273	0.0483188	0.481119	0.00062402	-0.337114	0.0196746	0.210845	0.155125	-0.607388	1.8117e-06	-0.818233	2.23779e-10
C1_00900W	orf19.6014	RRS1	0.442254	3.77209e-07	0.431663	4.9659e-06	-0.336717	0.00034181	-0.0105912	0.955915	-0.778971	7.34787e-20	-0.76838	1.57616e-18
CR_02390W	orf19.3728	orf19.3728	-0.444128	6.08603e-06	0.116293	0.421375	-0.336172	0.00108874	0.560422	8.84273e-09	0.107957	0.360872	-0.452465	5.03903e-06
C5_01710C	orf19.3204	orf19.3204	0.400448	0.00428027	0.0845284	0.727455	-0.335491	0.0288376	-0.31592	0.0375477	-0.735939	3.94369e-08	-0.420019	0.00448526
C5_02530W	orf19.4265	UAP1	-1.71618	3.46632e-76	-0.00424221	0.981616	-0.335479	0.000991576	1.71194	1.98465e-75	1.3807	2.83575e-49	-0.331236	0.00103518
C2_02620W	orf19.1588	orf19.1588	0.346198	0.000166313	-0.187384	0.120564	-0.334808	0.000587687	-0.533583	6.14379e-09	-0.681006	1.83592e-14	-0.147424	0.186327
C1_03310W	orf19.3027	ARP7	0.252349	0.034657	-0.0932637	0.616158	-0.334467	0.00574072	-0.345612	0.00376953	-0.586815	9.43903e-08	-0.241203	0.0590801
C4_05020W	orf19.3777	IMG2	0.478756	0.000144117	-0.069397	0.766325	-0.333766	0.0176764	-0.548153	2.0423e-05	-0.812522	3.54402e-11	-0.264369	0.0709911
CR_04900C	orf19.6302	PGA39	1.65201	0.0133862	1.06856	NA	-0.333675	0.758323	-0.583447	0.474663	-1.98568	0.00339735	-1.40223	0.0680919
C3_07090W	orf19.6791	HHT1	-0.897904	1.47819e-10	-0.258527	0.170881	-0.332556	0.0330519	0.639377	2.00673e-05	0.565348	0.000111419	-0.0740293	0.708648
CR_01810C	orf19.2581	orf19.2581	0.814402	0.00255362	0.139809	0.78544	-0.331271	0.353819	-0.674593	0.0204586	-1.14567	1.85316e-05	-0.47108	0.15497
C1_03830C	orf19.1026	orf19.1026	0.223315	0.0246573	0.142258	0.277283	-0.33112	0.000806004	-0.0810566	0.547811	-0.554435	1.32216e-09	-0.473378	6.44091e-07
C5_01100C	orf19.1960	CLN3	-0.413964	6.17786e-06	-0.305185	0.00359078	-0.32948	0.000561551	0.108779	0.377221	0.0844844	0.454178	-0.0242945	0.857198
C1_02450C	orf19.2934	orf19.2934	0.517398	3.53576e-05	0.41704	0.0032085	-0.32862	0.0172069	-0.100358	0.583646	-0.846018	3.21098e-12	-0.74566	2.20109e-09
C1_11240C	orf19.677	CHO1	-0.683031	4.44112e-22	-0.0550469	0.656392	-0.328606	1.08135e-05	0.627984	1.7577e-18	0.354425	1.39878e-06	-0.273559	0.000313916
C2_09660W	orf19.1388	orf19.1388	0.396753	0.000139458	0.392597	0.00060486	-0.327778	0.00325883	-0.00415642	0.987145	-0.724532	5.77192e-13	-0.720375	2.27882e-12
C1_09430W	orf19.4805	orf19.4805	-1.77921	6.83296e-112	0.00319181	0.983031	-0.326692	0.000103189	1.78241	3.66107e-111	1.45252	4.90481e-74	-0.329884	7.89478e-05
C2_04570W	orf19.4492	orf19.4492	0.555479	9.39817e-09	0.444639	2.73199e-05	-0.324833	0.00199439	-0.110841	0.39862	-0.880313	1.61713e-20	-0.769472	1.77019e-15
CR_07050C	orf19.2360	URA2	0.710257	3.96377e-26	0.287744	0.000208335	-0.321599	9.70398e-06	-0.422513	1.08588e-09	-1.03186	1.69639e-53	-0.609343	1.61439e-18
C4_00230W	orf19.5648	orf19.5648	-0.311752	7.59892e-05	-0.0712223	0.568536	-0.320432	6.79067e-05	0.240529	0.00414101	-0.00868013	0.941912	-0.24921	0.00262625
C6_01030W	orf19.105	HAL22	-0.337045	0.000497955	-0.051778	0.764364	-0.319205	0.00151762	0.285267	0.00572475	0.0178405	0.902543	-0.267427	0.00989086
C4_06490C	orf19.2885	PRI2	0.347751	0.0330787	-0.247175	0.254803	-0.317929	0.0713794	-0.594926	0.000194793	-0.66568	1.22764e-05	-0.0707538	0.749619
CR_07210W	orf19.6151	ARC15	0.39126	1.53388e-08	0.331075	1.22957e-05	-0.316121	1.43473e-05	-0.0601855	0.555747	-0.707381	1.43897e-25	-0.647196	8.36118e-21
C2_03810C	orf19.840	RPL21A	0.14239	0.0180256	0.0587666	0.495944	-0.315313	1.85365e-08	-0.083623	0.230636	-0.457702	3.41061e-17	-0.374079	1.25672e-11
C5_02370C	orf19.4245	OPY1	-0.75227	4.37594e-22	0.0711921	0.579236	-0.315155	0.000148027	0.823462	1.09418e-25	0.437115	6.60379e-08	-0.386347	2.2328e-06
C2_10050W	orf19.1777	orf19.1777	0.193397	0.0418974	-0.0789394	0.579438	-0.315054	0.000675464	-0.272337	0.00373798	-0.508451	3.55232e-09	-0.236115	0.014246
C1_04160C	orf19.1050	orf19.1050	-0.299877	0.044948	-0.412322	0.0142989	-0.31501	0.0420029	-0.112445	0.598764	-0.0151324	0.94287	0.0973128	0.615742
CR_05590C	tC(GCA)2	tC(GCA)2	-2.92892	NA	-3.22718	NA	-3.57011	NA	-0.298257	0.968341	-0.641187	0.898185	0	NA
C2_06890C	orf19.2244	orf19.2244	0.605401	5.67053e-05	0.0189817	0.951422	-0.31443	0.0817205	-0.586419	0.000188212	-0.91983	6.26966e-10	-0.333411	0.0630963
C2_07220W	orf19.2278	orf19.2278	-1.46144	8.58906e-122	-0.217312	0.0030983	-0.314362	1.45641e-06	1.24412	1.63532e-86	1.14707	2.30103e-74	-0.0970498	0.205561
C2_04580W	orf19.4491	ERG20	-0.0302671	0.788449	-0.277473	0.000638383	-0.325534	1.23039e-05	-0.247206	0.00136741	-0.295267	5.55787e-05	-0.0480607	0.626581
C4_05010W	orf19.3778	orf19.3778	0.585525	7.17321e-12	0.42482	9.60739e-06	-0.313792	0.00113776	-0.160705	0.118134	-0.899318	5.90723e-26	-0.738613	1.04076e-16
C1_03230C	orf19.3015	ARX1	0.438417	0.0046593	0.502163	0.00356924	-0.313788	0.0790568	0.0637457	0.798006	-0.752206	5.29644e-07	-0.815951	1.35761e-07
C1_12690C	orf19.6354	orf19.6354	0.431987	0.0153521	0.0469155	0.890956	-0.313292	0.128385	-0.385071	0.0453696	-0.745278	1.24742e-05	-0.360207	0.0726872
C3_06280W	orf19.7404	orf19.7404	-0.872564	0.0292234	-0.104484	0.880975	-0.312961	0.517789	0.76808	0.0807376	0.559603	0.194003	-0.208476	0.679696
C1_02420C	orf19.2929	GSC1	-0.421241	1.08209e-09	-0.0307995	0.813333	-0.312873	1.21204e-05	0.390441	2.50326e-08	0.108367	0.175118	-0.282074	8.54961e-05
C4_00610W	orf19.4182	orf19.4182	-0.370824	0.036183	-0.326135	0.125957	-0.312769	0.0966955	0.0446896	0.886475	0.0580556	0.797308	0.013366	0.955918
C4_05850C	orf19.1272	orf19.1272	0.512612	0.000282531	0.261646	0.169346	-0.312757	0.0580542	-0.250966	0.127641	-0.825369	2.60759e-09	-0.574404	0.000133301
C2_02420C	orf19.1565	orf19.1565	0.267453	0.00335451	0.332048	0.000646873	-0.312382	0.000795227	0.0645953	0.625014	-0.579836	1.42389e-11	-0.644431	1.25732e-13
C2_08240W	orf19.2219	ORF298	-0.238366	0.00474333	-0.0392522	0.795503	-0.311459	0.000220409	0.199114	0.0280913	-0.0730921	0.466927	-0.272206	0.00151018
C2_09700W	orf19.1382	YEA4	-0.847297	2.30129e-12	-0.126826	0.502126	-0.310858	0.0203061	0.720471	9.55066e-09	0.536439	1.94984e-05	-0.184031	0.209755
C5_01850C	orf19.3187	ZNC1	-0.216906	0.0055057	-0.031528	0.821546	-0.310754	5.44118e-05	0.185378	0.0261092	-0.093848	0.285547	-0.279226	0.000332012
C1_08870C	orf19.4746	JIP5	0.574245	8.89074e-12	0.492019	7.3296e-08	-0.310686	0.000769145	-0.082226	0.500165	-0.884931	2.26182e-26	-0.802705	3.92391e-21
C4_03740W	orf19.1304	orf19.1304	0.366797	0.000376047	0.222573	0.0879691	-0.307396	0.00634551	-0.144223	0.257746	-0.674193	1.50737e-11	-0.52997	5.39492e-07
C3_04100W	orf19.5854.1	orf19.5854.1	-0.361229	0.0141837	-0.0745576	0.771287	-0.30724	0.0508604	0.286671	0.0802767	0.0539885	0.781236	-0.232683	0.161225
C5_00640C	orf19.925	SAM51	0.268649	0.0143059	-0.470597	6.95746e-05	-0.306789	0.00720776	-0.739246	2.22143e-12	-0.575438	2.13422e-08	0.163808	0.20844
C2_07510W	orf19.1877	orf19.1877	-0.180058	0.137265	-0.278334	0.0369488	0.0204027	0.910155	-0.0982755	0.534898	0.200461	0.0839217	0.298736	0.0112946
CR_09580C	orf19.6604	orf19.6604	-0.992398	0.000599794	-0.307926	0.467142	-0.306777	0.379245	0.684471	0.0374371	0.685621	0.0245477	0.00114954	0.997394
C2_02150C	orf19.1531	orf19.1531	0.231393	0.00597502	0.0230838	0.883703	-0.306746	0.000349617	-0.20831	0.0198741	-0.53814	1.01418e-11	-0.32983	0.000111831
C2_03440W	orf19.876	PGA33	-0.492334	3.97315e-08	-0.055597	0.727514	-0.304056	0.00147881	0.436737	2.52046e-06	0.188278	0.0584087	-0.248459	0.0114925
CR_05670C	orf19.6645	HMO1	0.593936	3.80925e-11	-0.149428	0.277171	-0.303206	0.00334696	-0.743364	8.51652e-16	-0.897142	2.1365e-23	-0.153778	0.190237
C3_01420C	orf19.1709	orf19.1709	-0.980508	3.63082e-14	-0.391593	0.0122198	-0.301407	0.0378286	0.588915	2.92325e-05	0.679101	3.71661e-07	0.090186	0.616431
C6_00950C	orf19.96	TOP1	0.585065	6.16594e-17	-0.0455594	0.725991	-0.301025	7.09445e-05	-0.630624	3.54205e-19	-0.886089	2.34892e-37	-0.255465	0.000914925
C6_00590W	orf19.4199	SLY41	-0.653505	3.03084e-11	-0.142858	0.318977	-0.299899	0.00508522	0.510647	6.17096e-07	0.353606	0.000610784	-0.157041	0.185581
C2_09400C	orf19.1598	ERG24	-0.308286	0.0140206	0.0136557	0.951422	-0.298383	0.0215063	0.321942	0.0126085	0.00990286	0.956681	-0.312039	0.014251
C5_00540C	orf19.935	AGA1	-3.44168	0.0129229	-0.852679	NA	-0.29785	0.849271	2.589	0.0995708	3.14383	0.0238684	0.554829	0.697569
CR_03650W	orf19.4363	SGD1	0.508333	3.23973e-09	0.30353	0.00233324	-0.297643	0.00157491	-0.204802	0.0360086	-0.805976	1.54163e-21	-0.601173	7.47117e-12
C2_04880C	orf19.3521	ARH2	-0.528382	4.57617e-05	0.197615	0.262958	-0.297545	0.0372431	0.725996	1.4178e-08	0.230837	0.109088	-0.495159	0.000179425
C6_02770W	orf19.5550	MRT4	0.263219	0.00714456	0.175513	0.153787	-0.296252	0.00314639	-0.0877064	0.509448	-0.559471	1.03455e-09	-0.471765	6.80712e-07
C5_03970W	orf19.3214	orf19.3214	-0.6263	9.32109e-05	0.0114081	0.970133	-0.296103	0.10345	0.637708	0.000112051	0.330197	0.057619	-0.307511	0.0874623
C5_05450C	orf19.4044	MUM2	-1.38818	9.18595e-51	-0.186886	0.131054	-0.295632	0.00366849	1.2013	1.96386e-37	1.09255	2.06806e-31	-0.108746	0.359822
C3_02540C	orf19.243	OXR1	-0.661025	1.26821e-10	-0.323324	0.00886171	-0.295504	0.00865607	0.337701	0.00335921	0.365522	0.000734078	0.0278207	0.859046
CR_06120W	orf19.3867	RPL7	0.431632	1.30407e-05	0.417877	0.000126039	-0.294815	0.00705159	-0.0137548	0.947172	-0.726447	6.10464e-14	-0.712692	7.79121e-13
C6_02580W	orf19.5527	orf19.5527	-0.403847	0.000421248	-0.254757	0.0743345	-0.293705	0.0171669	0.14909	0.318089	0.110142	0.426398	-0.0389481	0.816509
C7_02910W	orf19.5170	ENA21	0.698206	8.11922e-22	-0.398319	9.5193e-07	-0.293121	0.000209145	-1.09653	1.1396e-51	-0.991327	6.78724e-43	0.105198	0.251677
C2_03600W	orf19.860	BMT8	-1.10063	5.07723e-34	-0.20372	0.0805488	-0.292563	0.0027252	0.896909	1.00031e-21	0.808067	2.75218e-18	-0.0888427	0.458061
C1_02180W	orf19.3675	GAL7	-0.364792	0.014018	0.27168	0.129314	-0.291893	0.0650482	0.636472	6.76901e-06	0.0728992	0.696946	-0.563573	7.87005e-05
CR_02550C	orf19.168	orf19.168	0.434261	1.3907e-05	0.386562	0.000557366	-0.29174	0.00873405	-0.0476993	0.773632	-0.726001	1.17408e-13	-0.678302	2.09564e-11
C5_02140C	orf19.4220	orf19.4220	-0.22576	0.00215408	0.00983652	0.948873	-0.291367	7.22535e-05	0.235597	0.00176473	-0.0656068	0.454194	-0.301204	3.85939e-05
C3_06740W	orf19.6829	orf19.6829	0.31103	0.0208958	0.0102883	0.968747	-0.291255	0.0486941	-0.300741	0.0366148	-0.602285	2.21314e-06	-0.301544	0.0412946
C6_01720C	orf19.3414	SUR7	-0.819726	1.00701e-21	0.226303	0.0339677	-0.288523	0.00211399	1.04603	8.3258e-35	0.531204	1.15384e-09	-0.514825	4.70524e-09
C6_04530C	orf19.2143	orf19.2143	0.402047	1.72718e-07	0.420805	2.92628e-07	-0.288337	0.000407421	0.018758	0.899064	-0.690384	2.9101e-20	-0.709142	7.56883e-21
C3_02370C	orf19.1607	ALR1	0.353785	5.51723e-07	0.223237	0.00693674	-0.287678	0.000103734	-0.130548	0.11952	-0.641463	8.72229e-21	-0.510915	4.32803e-13
C5_04990W	orf19.3990	orf19.3990	0.581442	0.00143151	0.316189	0.190443	-0.286987	0.188309	-0.265253	0.22444	-0.86843	9.38129e-07	-0.603176	0.00153309
C1_01420C	orf19.3330	CRL1	-0.63776	5.55909e-15	-0.0816864	0.536416	-0.286173	0.00115709	0.556074	3.08672e-11	0.351587	3.59871e-05	-0.204487	0.0266381
C4_04630C	orf19.3819	orf19.3819	-2.748	0.260123	-0.618029	NA	0.41968	NA	2.12997	0.471611	3.16768	0.161748	1.03771	0.667145
C1_11630C	orf19.1156	FUS1	-2.74369	NA	-2.08016	NA	-2.42308	NA	0	NA	0	NA	0	NA
C2_04330C	orf19.4521	orf19.4521	-0.623355	0.00406016	-0.278333	0.363528	-0.285792	0.259238	0.345022	0.189295	0.337563	0.156417	-0.007459	0.980859
C2_02510W	orf19.1575	PRS1	0.308354	0.00349677	0.207381	0.110613	-0.28564	0.00985219	-0.100972	0.475678	-0.593994	2.52171e-09	-0.493021	1.70025e-06
C6_00120W	orf19.6325.1	orf19.6325.1	-0.613453	0.00464424	-0.0708904	0.855866	-0.285314	0.259185	0.542562	0.0200737	0.328138	0.168111	-0.214424	0.418726
C2_05830C	orf19.5206	orf19.5206	0.472261	0.00533574	0.379872	0.0640531	-0.284292	0.154589	-0.0923887	0.720773	-0.756553	3.73209e-06	-0.664164	0.000117945
C6_03520C	orf19.5718	orf19.5718	-0.299642	0.0234999	-0.323455	0.0340748	-0.284217	0.0402963	-0.0238134	0.926623	0.0154245	0.936541	0.0392379	0.831227
C2_07300C	orf19.2287	RPA12	0.362114	0.000571423	0.384697	0.000831498	-0.283688	0.0130506	0.0225825	0.909777	-0.645802	1.72393e-10	-0.668384	1.02548e-10
C2_00930C	orf19.2031	VPS24	0.275357	0.0234936	0.0503499	0.819325	-0.283342	0.0304872	-0.225007	0.0938201	-0.558698	1.02435e-06	-0.333692	0.00924533
C2_07170C	orf19.2272	AFT2	-0.348466	0.00150937	0.0118521	0.953652	-0.282978	0.0152135	0.360318	0.00144085	0.0654886	0.638745	-0.29483	0.0106211
C4_00390W	orf19.5666	orf19.5666	-0.346611	3.06061e-06	-0.129527	0.198956	-0.281901	0.000273745	0.217084	0.00757838	0.0647107	0.484661	-0.152374	0.0720599
C2_09590C	orf19.1395	orf19.1395	-0.51661	0.000334153	-0.064376	0.805744	-0.280796	0.081504	0.452234	0.00291701	0.235814	0.140728	-0.21642	0.197705
C4_02580W	orf19.2742	orf19.2742	0.683741	1.66837e-05	0.280473	0.205918	-0.27879	0.157845	-0.403269	0.0208595	-0.962532	9.52737e-10	-0.559263	0.00132521
C1_12280C	orf19.5235	orf19.5235	0.654702	5.01802e-07	-0.0766248	0.749951	-0.277391	0.0684806	-0.731326	3.00677e-08	-0.932093	3.56996e-13	-0.200766	0.209323
C3_04270C	orf19.5870	CTP1	0.181717	0.0212293	0.123608	0.22009	-0.276061	0.000360739	-0.0581095	0.596515	-0.457779	2.29114e-10	-0.399669	7.79686e-08
C1_09510W	orf19.4815	YTM1	0.399616	6.90338e-08	0.435252	3.25088e-08	-0.275872	0.000470292	0.0356359	0.775723	-0.675488	8.82232e-21	-0.711124	2.12009e-22
CR_02000C	orf19.2601	HEM1	0.330515	0.000388059	0.539272	1.60583e-08	-0.273748	0.00554762	0.208757	0.0402417	-0.604263	1.20662e-11	-0.81302	6.78748e-20
C5_03920C	orf19.3220	orf19.3220	0.323405	0.0194932	0.232898	0.185794	-0.273419	0.070467	-0.0905071	0.649928	-0.596823	4.52732e-06	-0.506316	0.000221341
C6_00870C	orf19.88	ILV5	0.251958	0.00145324	0.0793742	0.50076	-0.273144	0.000648073	-0.172584	0.045879	-0.525102	1.82082e-12	-0.352518	5.23501e-06
C3_01000W	orf19.2504	BMS1	0.587464	5.37086e-10	0.437175	2.87843e-05	-0.272851	0.0101179	-0.15029	0.201069	-0.860315	2.82655e-20	-0.710025	1.17288e-13
C3_01150C	orf19.158	orf19.158	-0.330619	0.00107334	0.00358454	0.983031	-0.272473	0.0106154	0.334204	0.00131206	0.0581457	0.652589	-0.276058	0.0090362
C1_12680W	orf19.6355	orf19.6355	0.450727	5.89428e-08	0.395514	1.14886e-05	-0.270477	0.00260689	-0.0552131	0.671475	-0.721204	6.31531e-19	-0.665991	6.85651e-16
C2_05090W	orf19.3540	MAK5	0.540226	3.34201e-12	0.436319	3.54695e-07	-0.269689	0.00201581	-0.103907	0.307547	-0.809915	9.67879e-26	-0.706007	9.62797e-19
C1_06150W	orf19.2430	orf19.2430	-2.68079	NA	-2.01726	NA	-2.36019	NA	0	NA	0	NA	0	NA
CR_07400C	orf19.6127	LPD1	0.593782	3.67657e-24	0.574021	2.7612e-21	-0.269686	1.53543e-05	-0.0197613	0.85911	-0.863468	4.42855e-50	-0.843707	1.77447e-47
C1_01630W	orf19.3353	orf19.3353	-0.237501	0.0129659	-0.423891	1.55827e-05	-0.269246	0.00530876	-0.186391	0.0786379	-0.0317452	0.799157	0.154645	0.144855
C4_05120C	orf19.741	orf19.741	-2.65966	NA	-1.03433	NA	-2.33905	NA	1.62532	NA	0	NA	-1.30472	NA
C1_05060W	orf19.59	REI1	0.763372	1.66135e-13	0.699758	2.36274e-10	-0.269229	0.0236568	-0.0636132	0.703324	-1.0326	7.80047e-24	-0.968987	1.26452e-20
C5_05440C	orf19.4043	orf19.4043	-0.551501	3.77445e-06	-0.159815	0.350942	-0.267872	0.0436568	0.391686	0.00186654	0.28363	0.0253996	-0.108057	0.475895
C1_06180W	orf19.2661	TLO34	-0.735385	0.00135561	0.225239	0.508851	-0.267271	0.336049	0.960625	2.13972e-05	0.468114	0.0515435	-0.492511	0.0428964
C5_03020W	orf19.4328	CCC2	0.715503	7.3654e-22	-0.071767	0.572911	-0.266852	0.00143815	-0.78727	1.45961e-25	-0.982356	7.69392e-40	-0.195085	0.0255599
C2_01130W	orf19.2012	NOT3	0.207554	0.000536826	0.105067	0.180988	-0.265668	1.00329e-05	-0.102486	0.1436	-0.473222	7.20686e-17	-0.370735	2.41536e-10
C2_08740W	orf19.3601	orf19.3601	-0.494437	2.35938e-05	-0.179261	0.27523	-0.265638	0.0404195	0.315176	0.0156789	0.228799	0.0756025	-0.0863771	0.582656
C3_04250W	orf19.5867	WSC1	-0.359326	0.0106913	0.0410207	0.873665	-0.265058	0.0834869	0.400346	0.00553554	0.0942674	0.583415	-0.306079	0.0396474
C2_01010W	orf19.2021	HGT8	0.240944	0.0468787	0.230281	0.105018	-0.263781	0.0345632	-0.0106638	0.965364	-0.504725	5.30253e-06	-0.494062	1.48276e-05
C1_03370W	orf19.3037	orf19.3037	0.659849	4.67781e-21	0.329374	2.80929e-05	-0.262317	0.000619567	-0.330475	7.62325e-06	-0.922165	3.71246e-40	-0.591691	1.14871e-16
CR_08850W	orf19.7280	orf19.7280	-2.65825	NA	-1.99472	NA	-2.33765	NA	0	NA	0	NA	0	NA
C4_06990W	orf19.3110	MNN46	-0.666172	6.59353e-17	-0.249668	0.0100003	-0.262088	0.00253504	0.416504	1.00319e-06	0.404084	1.0105e-06	-0.0124201	0.923224
C2_06660W	orf19.81	orf19.81	0.478597	0.00030061	0.325187	0.0427768	-0.260778	0.0884862	-0.15341	0.371405	-0.739375	8.95487e-09	-0.585965	1.4547e-05
C1_12770W	orf19.6345	RPG1A	0.582357	1.23118e-16	0.214121	0.0126079	-0.260698	0.000681236	-0.368236	4.61188e-07	-0.843055	8.733e-34	-0.474819	5.34784e-11
C1_11550W	orf19.1164	GAR1	0.214637	0.0020459	0.256977	0.000531764	-0.260663	0.000188619	0.0423393	0.686653	-0.475301	3.35863e-13	-0.51764	3.65634e-15
CR_07440W	orf19.6124	ACE2	0.688444	1.20845e-09	0.700688	1.21918e-08	-0.259244	0.0601398	0.0122446	0.961063	-0.947688	5.98401e-17	-0.959932	2.06056e-16
CR_01780W	orf19.2575	orf19.2575	0.254706	0.00555171	0.265289	0.0103599	-0.25887	0.00704575	0.0105837	0.956128	-0.513575	2.99071e-09	-0.524159	3.51452e-09
C3_02260C	orf19.1619	orf19.1619	-0.183848	0.0238924	-0.181081	0.0564867	-0.255866	0.00147496	0.00276722	0.988942	-0.0720181	0.440326	-0.0747853	0.447361
CR_02720C	orf19.2831	RPC31	0.347689	0.00137583	0.293214	0.0221796	-0.255341	0.0347327	-0.0544747	0.752328	-0.60303	8.25989e-09	-0.548555	5.09364e-07
C4_06480C	orf19.2886	CEK1	-1.59257	5.96366e-115	-0.630142	5.98604e-18	-0.255152	0.000616384	0.962424	4.20827e-40	1.33741	3.07675e-80	0.37499	3.2576e-07
C1_10620W	orf19.1833	orf19.1833	0.32597	0.0464066	-0.0467339	0.874553	-0.254529	0.161333	-0.372704	0.0269564	-0.580499	0.000135316	-0.207795	0.265238
C6_02150C	orf19.3455	orf19.3455	0.511771	0.0023293	0.235695	0.330173	-0.254418	0.217063	-0.276076	0.158906	-0.766189	2.90181e-06	-0.490113	0.00717386
C2_09720W	orf19.1378	SUP35	0.240481	0.000750092	0.176162	0.0364588	-0.253869	0.000497319	-0.0643197	0.517918	-0.49435	2.60454e-13	-0.430031	5.07482e-10
C1_04390C	orf19.5198	NOP4	0.640813	5.74987e-12	0.539744	8.63806e-08	-0.253806	0.0164995	-0.101068	0.436224	-0.894619	2.46348e-22	-0.79355	2.84442e-17
C2_08420W	orf19.3639	orf19.3639	-0.307707	0.0318479	-0.123931	0.565018	-0.253675	0.0993196	0.183776	0.286403	0.0540319	0.768031	-0.129744	0.453329
C3_02290W	orf19.1617	orf19.1617	-0.473126	2.87678e-05	-0.2687	0.0576491	-0.252656	0.0443981	0.204426	0.140429	0.22047	0.0767079	0.0160443	0.928452
C1_03090W	orf19.3002	RPS1	0.231538	8.71261e-05	0.094207	0.236716	-0.252274	2.14174e-05	-0.137332	0.034644	-0.483812	6.26515e-18	-0.346481	1.63085e-09
C4_00220C	orf19.5647	SUB2	0.302151	0.00271041	0.00206948	0.989304	-0.252165	0.0182684	-0.300082	0.00378846	-0.554316	6.06669e-09	-0.254234	0.0158485
C5_01230C	orf19.1946	orf19.1946	-0.446185	2.46128e-15	-0.248678	8.95927e-05	-0.252023	2.212e-05	0.197508	0.00140962	0.194162	0.00114247	-0.00334582	0.96859
C5_05100C	orf19.4002	DUN1	-0.219631	0.0303431	-0.242655	0.0364551	-0.251911	0.0146219	-0.0230235	0.900652	-0.0322803	0.804966	-0.00925675	0.948935
C1_11770C	orf19.1139	orf19.1139	-0.933419	2.45324e-58	0.0632642	0.49604	-0.251301	5.24555e-05	0.996683	1.28001e-65	0.682118	3.76686e-31	-0.314565	2.24945e-07
C1_05770C	orf19.2474	PRC3	-0.274627	0.00365799	-0.338271	0.000869616	-0.250592	0.0107825	-0.0636443	0.652507	0.0240348	0.855121	0.0876791	0.451759
C6_04080W	orf19.1214	orf19.1214	0.241415	0.00191948	-0.0995943	0.37322	-0.248467	0.00218014	-0.341009	1.06205e-05	-0.489882	3.11553e-11	-0.148873	0.0896438
C1_11380W	orf19.665	NEP1	0.33903	0.000174592	0.0998516	0.459317	-0.248249	0.0106364	-0.239179	0.0139005	-0.587279	1.32506e-11	-0.348101	0.000159846
CR_10840C	orf19.7676	XYL2	-2.01548	1.28309e-15	-0.134378	0.752633	-0.248138	0.417609	1.8811	2.92812e-13	1.76734	4.21944e-12	-0.11376	0.733447
C4_00750C	orf19.4167	orf19.4167	0.457932	0.00154032	0.22763	0.259362	-0.2476	0.154384	-0.230302	0.177919	-0.705532	5.55953e-07	-0.47523	0.00216853
C2_07060W	orf19.2261	orf19.2261	-0.280902	0.00365514	0.0272457	0.879068	-0.246685	0.0158381	0.308147	0.00192982	0.0342168	0.79041	-0.273931	0.00669582
C1_09490C	orf19.4813	GUA1	0.486025	1.34766e-11	0.254195	0.00212328	-0.246553	0.00150776	-0.23183	0.00297488	-0.732578	2.89073e-25	-0.500748	4.50656e-12
C1_03750W	orf19.1034	orf19.1034	-0.405967	1.77862e-05	-0.15809	0.223554	-0.246098	0.016968	0.247877	0.018925	0.159869	0.132811	-0.0880074	0.473149
C5_00800C	orf19.583	orf19.583	-0.417238	1.67042e-11	-0.0217844	0.854552	-0.245832	0.000179316	0.395454	3.13976e-10	0.171406	0.0101795	-0.224047	0.000685129
C2_09390W	orf19.1597	ABG1	-0.189886	0.0123246	-0.297455	0.000192012	-0.245709	0.00115709	-0.107569	0.236131	-0.0558234	0.539061	0.0517457	0.594907
C4_00150C	orf19.5640	PEX5	-0.205861	0.0173965	-0.0898921	0.466491	-0.245698	0.00467331	0.115969	0.259066	-0.0398369	0.714125	-0.155806	0.0928867
C7_02340C	orf19.6477	orf19.6477	0.337383	2.39313e-05	0.300446	0.000784455	-0.245663	0.0047926	-0.0369367	0.781879	-0.583046	6.1547e-14	-0.546109	1.00209e-11
C4_00580W	orf19.4185	orf19.4185	-0.374391	0.000256099	-0.0783584	0.645153	-0.245584	0.0277941	0.296033	0.00731431	0.128807	0.277925	-0.167225	0.161238
C1_12820C	orf19.6340	orf19.6340	0.349433	0.000147489	-0.00730774	0.968704	-0.245237	0.0155696	-0.35674	0.000166072	-0.59467	2.47857e-11	-0.237929	0.0190976
C2_08760C	orf19.3599	TIF4631	0.499897	6.3303e-17	0.162692	0.0287445	-0.2452	0.000132631	-0.337205	4.51535e-08	-0.745096	1.54646e-36	-0.407891	2.54921e-11
CR_02970C	orf19.2857	orf19.2857	0.175722	0.0446985	0.117569	0.308332	-0.245169	0.00493074	-0.0581526	0.634858	-0.420891	1.24587e-07	-0.362738	1.33338e-05
C6_01700W	orf19.3415.1	RPL32	0.194271	0.00294073	0.0694082	0.462452	-0.244594	0.000158915	-0.124863	0.0859364	-0.438865	5.6959e-13	-0.314002	5.52337e-07
C4_03280W	orf19.2665	MSN5	0.231509	0.0215823	0.132899	0.338574	-0.244412	0.021644	-0.0986092	0.450864	-0.475921	4.23533e-07	-0.377312	0.000166566
C2_08560W	orf19.3623	SMC2	0.222695	0.0342832	-0.214954	0.0882516	-0.244276	0.0252665	-0.437649	1.40731e-05	-0.466971	1.48939e-06	-0.0293218	0.839928
C6_01670W	orf19.3419	MAE1	-0.77662	3.04003e-06	0.405922	0.0437415	-0.243935	0.223101	1.18254	2.90041e-13	0.532685	0.00178929	-0.649857	0.000120991
CR_02170W	orf19.2618	MET2	0.365008	1.61024e-05	0.394891	1.3682e-05	-0.24387	0.00818238	0.0298835	0.840174	-0.608877	1.23283e-13	-0.638761	2.02707e-14
C2_02430W	orf19.1566	UTP21	0.43124	1.70694e-05	0.479767	6.80648e-06	-0.242075	0.0299621	0.0485264	0.768909	-0.673316	4.55848e-12	-0.721842	2.10805e-13
C4_05230C	orf19.6862	orf19.6862	0.67516	3.7419e-07	0.258339	0.148053	-0.241351	0.136387	-0.416821	0.00346651	-0.916511	2.87434e-12	-0.49969	0.000465334
C5_04600C	orf19.3944	GRR1	-0.394908	1.07324e-10	-0.15167	0.0479777	-0.24134	0.000190819	0.243238	0.000187438	0.153568	0.0209169	-0.0896702	0.229668
C4_03140C	orf19.2676	orf19.2676	0.275632	0.0266868	0.456869	0.000430066	-0.241254	0.0805937	0.181236	0.193947	-0.516887	1.02114e-05	-0.698123	4.3508e-09
C2_08140C	orf19.2170	PHM7	-1.57715	5.57904e-170	0.313112	6.7371e-07	-0.240653	8.971e-05	1.89026	8.11326e-244	1.3365	1.09227e-121	-0.553765	7.73648e-22
C6_03380W	orf19.5627	orf19.5627	0.372101	2.69533e-07	0.252614	0.00233385	-0.239926	0.00220957	-0.119487	0.17649	-0.612028	4.43164e-18	-0.492541	1.44947e-11
CR_05630W	orf19.6652	DBP8	0.676198	3.06383e-12	0.639957	9.74721e-10	-0.239575	0.0371215	-0.0362415	0.83281	-0.915773	2.55297e-21	-0.879532	7.0772e-19
C1_00870W	orf19.6018	LRO1	-0.408895	6.11213e-06	-0.0652169	0.670669	-0.239403	0.0148301	0.343678	0.000253327	0.169492	0.0893088	-0.174186	0.0883361
C6_02990W	orf19.5578	orf19.5578	0.269427	0.00696396	-0.176008	0.182077	-0.239028	0.026562	-0.445435	6.35091e-06	-0.508455	7.56384e-08	-0.0630203	0.639111
C6_03720W	orf19.5746	ALA1	0.201261	0.00256923	-0.0403958	0.72164	-0.238197	0.000390313	-0.241657	0.00029452	-0.439459	2.14855e-12	-0.197801	0.00370566
C2_09160W	orf19.4078	orf19.4078	0.375771	8.50972e-05	0.262216	0.0244897	-0.238025	0.0292774	-0.113555	0.364367	-0.613796	5.17677e-11	-0.50024	4.64019e-07
C6_03650C	orf19.5734	POP2	0.197587	0.0152803	-0.0144273	0.927325	-0.237722	0.00433333	-0.212014	0.0119113	-0.435309	8.98217e-09	-0.223295	0.00793863
C2_08370C	orf19.1435	TEF1	0.391408	5.44639e-11	0.248091	0.000189729	-0.23766	0.000161162	-0.143316	0.0355911	-0.629068	4.33615e-27	-0.485752	2.45985e-16
C1_11360W	orf19.667.1	RPL37B	0.150559	0.0194414	0.0438028	0.666234	-0.237621	0.000124352	-0.106756	0.135346	-0.38818	3.34917e-11	-0.281424	3.12082e-06
C6_02600W	orf19.5530	NAB3	0.234491	0.00186394	0.0997733	0.343758	-0.236836	0.00228508	-0.134718	0.117597	-0.471328	3.39919e-11	-0.33661	5.84115e-06
CR_04360C	orf19.526	NHP2	0.329203	0.000122071	0.247125	0.013523	-0.236045	0.0108439	-0.0820779	0.491362	-0.565248	7.46964e-12	-0.48317	1.35152e-08
C4_04890C	orf19.3789	RPL24A	0.17302	0.00147227	0.0844176	0.241589	-0.235264	1.09013e-05	-0.0886022	0.161829	-0.408284	9.94772e-16	-0.319682	7.25036e-10
C2_04600C	orf19.4490	RPL17B	0.193897	0.00151495	0.0372672	0.719871	-0.235136	0.000113281	-0.15663	0.0154118	-0.429033	7.17397e-14	-0.272403	4.73731e-06
CR_06840W	orf19.1849	orf19.1849	0.491604	9.34837e-10	0.190955	0.067643	-0.234149	0.0107949	-0.300649	0.000443164	-0.725754	7.53127e-20	-0.425104	6.67755e-07
C2_03010C	orf19.5801	RNR21	0.447618	8.17802e-15	-0.318571	4.82452e-07	-0.233933	0.000148027	-0.766189	2.54685e-41	-0.681551	3.36506e-33	0.0846375	0.23376
C6_02490C	orf19.5518	orf19.5518	0.40552	2.55634e-06	-0.513737	4.2648e-08	-0.233422	0.0144974	-0.919257	2.34781e-27	-0.638942	2.88306e-14	0.280315	0.00294724
C1_07960W	orf19.5067	orf19.5067	0.570402	5.41934e-05	0.38028	0.0263122	-0.233281	0.176114	-0.190122	0.282795	-0.803683	6.68614e-09	-0.613561	2.95344e-05
C2_05100C	orf19.3541	ERF1	0.180632	0.0363168	0.109018	0.345371	-0.232947	0.00702414	-0.0716138	0.532344	-0.41358	1.51736e-07	-0.341966	3.16142e-05
C7_03080W	orf19.5147	LMO1	-0.854283	5.1207e-49	-0.00513769	0.965467	-0.232311	0.000213777	0.849146	1.09748e-47	0.621973	4.31192e-26	-0.227173	0.000289354
C5_03870C	orf19.1107	orf19.1107	-0.520327	0.000559612	-0.255583	0.204376	-0.231672	0.186155	0.264744	0.14266	0.288654	0.0761366	0.0239101	0.917251
C5_02490C	orf19.4261	TIF5	0.249828	0.00054915	-0.0155815	0.913003	-0.231581	0.00219598	-0.265409	0.000316577	-0.481409	2.89842e-12	-0.216	0.00446214
C5_03130W	orf19.4342	SUT1	0.792651	1.06585e-11	0.491734	0.000221543	-0.230975	0.105538	-0.300916	0.0215916	-1.02363	1.16789e-18	-0.72271	2.80233e-09
C6_02160W	orf19.3456	orf19.3456	-1.03395	1.10297e-19	-0.068045	0.739305	-0.230662	0.0764052	0.965907	1.54545e-16	0.80329	5.16141e-12	-0.162617	0.240854
C6_04040C	orf19.1220	RVS167	-0.172025	0.0380898	0.0426625	0.754036	-0.23058	0.00477237	0.214688	0.00962913	-0.0585545	0.54479	-0.273242	0.000594715
C2_00410C	orf19.2090	orf19.2090	0.440862	0.000814851	0.374098	0.0147018	-0.230055	0.137985	-0.0667647	0.749512	-0.670917	1.49201e-07	-0.604153	5.53727e-06
C1_12700W	orf19.6353	orf19.6353	-0.799603	3.76314e-22	-0.247511	0.0147292	-0.229944	0.0121846	0.552092	2.87922e-10	0.569659	1.82808e-11	0.0175669	0.893439
C1_07540C	orf19.2791	BBC1	-0.509466	2.95553e-09	-0.0908312	0.498114	-0.229691	0.0155045	0.418635	2.28411e-06	0.279776	0.00182987	-0.138859	0.172887
C5_00790C	orf19.581	orf19.581	0.294878	0.00233926	0.0497646	0.771693	-0.22937	0.0276505	-0.245113	0.0170663	-0.524248	1.18652e-08	-0.279135	0.0052374
C7_02510W	orf19.6458.1	orf19.6458.1	0.229802	0.0070314	-0.162432	0.13364	-0.228704	0.0108221	-0.392235	2.70449e-06	-0.458506	1.11093e-08	-0.0662718	0.547325
C1_01700W	orf19.3359	ARP8	0.463866	1.1843e-12	-0.0569351	0.615284	-0.227523	0.00170381	-0.520801	3.18159e-15	-0.691389	1.10642e-26	-0.170588	0.0239148
C1_11110C	orf19.2305	orf19.2305	0.212911	0.0129841	-0.0212914	0.893695	-0.227142	0.0112852	-0.234203	0.00811867	-0.440053	4.06796e-08	-0.20585	0.023875
CR_01820W	orf19.2582	orf19.2582	0.14483	0.0447699	0.0852043	0.379926	-0.224858	0.00137652	-0.0596261	0.53163	-0.369689	1.36684e-08	-0.310063	4.7202e-06
C3_02770C	orf19.268	orf19.268	-0.309929	0.0053844	-0.189182	0.19819	-0.224417	0.0644173	0.120747	0.418231	0.0855119	0.52737	-0.0352353	0.825072
CR_02940C	orf19.2851	orf19.2851	0.59861	0.00782112	0.216074	0.540282	-0.223935	0.447988	-0.382536	0.13577	-0.822545	0.000175314	-0.440009	0.086292
C7_02850W	orf19.5177	orf19.5177	-0.273819	0.0043758	-0.199129	0.0903514	-0.223923	0.0283726	0.07469	0.591574	0.049896	0.685247	-0.0247941	0.856179
C1_06740C	orf19.6236	NOP6	0.532475	1.082e-06	0.406298	0.00109777	-0.222797	0.0862337	-0.126177	0.386497	-0.755272	2.25915e-12	-0.629095	2.10595e-08
C3_02020W	orf19.1646	orf19.1646	0.554782	1.61177e-11	0.486011	4.82038e-08	-0.222458	0.0175536	-0.0687705	0.579373	-0.77724	1.25666e-21	-0.708469	1.39286e-17
C4_05320W	orf19.1789.1	LYS1	-0.147688	0.0476451	0.0768706	0.456912	-0.221975	0.00224168	0.224559	0.00190008	-0.0742869	0.366407	-0.298845	2.05917e-05
C2_03850W	tR(UCU)3	tR(UCU)3	-2.57269	NA	-1.90915	NA	-0.374666	NA	0.663536	0.892319	2.19802	0.452808	1.53449	NA
C1_11120C	orf19.2304	orf19.2304	-0.242363	2.45589e-05	-0.133577	0.0605122	-0.221254	0.000190302	0.108786	0.108384	0.0211091	0.788955	-0.087677	0.197932
C5_01420W	orf19.4132	orf19.4132	-0.710033	7.79814e-17	-0.13986	0.249504	-0.221193	0.020514	0.570173	1.4275e-10	0.48884	2.39327e-08	-0.0813338	0.473881
C1_03550C	orf19.3058	COQ6	-0.391877	0.00104963	0.151299	0.366829	-0.220877	0.0977113	0.543177	3.65606e-06	0.171001	0.198091	-0.372176	0.00210915
C3_01610W	orf19.1682	orf19.1682	-0.197252	0.0402417	0.166548	0.146899	-0.220358	0.0234482	0.3638	5.75183e-05	-0.0231052	0.856749	-0.386905	1.61704e-05
C5_04300C	orf19.3915	orf19.3915	0.196289	0.00243329	0.000480841	0.996202	-0.220027	0.000887887	-0.195808	0.00341763	-0.416316	8.56611e-12	-0.220508	0.000847757
CR_10020C	orf19.7578	orf19.7578	-1.33556	0.021175	-0.862528	NA	-0.219597	0.772215	0.473031	0.584602	1.11596	0.059764	0.642931	0.343295
C1_09790C	orf19.4844	orf19.4844	0.40461	0.00199972	0.365049	0.0159467	-0.21952	0.153058	-0.0395609	0.86493	-0.624131	7.74598e-07	-0.58457	8.51377e-06
CR_01280C	orf19.3226	orf19.3226	0.205841	0.00578354	-0.260581	0.00155849	-0.219506	0.00456352	-0.466422	7.5752e-11	-0.425347	1.32216e-09	0.0410753	0.68325
C2_02960C	orf19.5808	orf19.5808	-0.296584	0.00100083	0.00335436	0.983031	-0.219427	0.0236568	0.299938	0.00130445	0.0771566	0.47947	-0.222782	0.0210747
CR_05900W	orf19.6624	orf19.6624	-0.780923	5.10348e-09	-0.284429	0.0990279	-0.218489	0.168087	0.496494	0.000641469	0.562434	4.15178e-05	0.0659397	0.728088
C1_02200C	orf19.3677	orf19.3677	-0.69846	0.000161486	-0.00207891	0.995416	-0.21684	0.335016	0.696381	0.000312418	0.481621	0.0132433	-0.214761	0.33927
C4_03850W	orf19.5040	orf19.5040	0.320695	0.00804281	0.106252	0.577896	-0.216021	0.119639	-0.214443	0.118354	-0.536715	3.45266e-06	-0.322273	0.0126163
C2_02110C	orf19.1527	orf19.1527	-0.452748	0.00119302	-0.0546374	0.831238	-0.215709	0.182464	0.39811	0.00785597	0.237039	0.121556	-0.161072	0.345203
C7_01050W	orf19.7009	orf19.7009	-2.55583	0.285624	0.600977	NA	0.461646	NA	3.1568	0.183547	3.01747	0.169886	-0.139331	0.952269
C5_04630W	orf19.3947	orf19.3947	0.240076	0.0109867	0.0752686	0.615284	-0.215488	0.0333441	-0.164807	0.120999	-0.455564	2.94479e-07	-0.290756	0.00262536
C1_11690W	orf19.1150	orf19.1150	0.790161	2.27907e-05	-0.0714785	0.85134	-0.214433	0.401566	-0.861639	9.91558e-06	-1.00459	6.47795e-08	-0.142954	0.598716
C7_02240W	orf19.6489	FMP45	-0.972621	0.0237983	0.350331	NA	-0.214147	0.698766	1.32295	0.00168798	0.758474	0.0895933	-0.564478	0.212436
C3_04190W	orf19.5861.1	orf19.5861.1	-1.45522	6.14861e-11	-0.55387	0.039714	-0.21347	0.442862	0.901349	0.000248022	1.24175	3.81225e-08	0.3404	0.195646
C1_00930C	orf19.6011	SIN3	0.472732	2.30364e-05	0.138292	0.402418	-0.213164	0.101952	-0.33444	0.00501364	-0.685896	3.03132e-10	-0.351456	0.0031817
C6_02430W	orf19.5510	orf19.5510	0.416826	3.45669e-08	0.142137	0.169346	-0.213026	0.0122243	-0.27469	0.000619017	-0.629852	2.3212e-17	-0.355162	8.29612e-06
C2_00130W	orf19.1906	orf19.1906	0.964461	0.000357854	0.192988	0.698127	-0.212698	0.587442	-0.771473	0.00758672	-1.17716	1.24125e-05	-0.405686	0.240048
C1_07950C	orf19.5066	orf19.5066	0.475914	3.20621e-05	0.335855	0.013995	-0.212239	0.121331	-0.140059	0.344718	-0.688154	8.57922e-10	-0.548094	3.69005e-06
C4_05440C	orf19.1800	orf19.1800	-0.794875	0.00100075	0.104924	0.808595	-0.211236	0.495879	0.8998	0.000203853	0.583639	0.0187186	-0.31616	0.256936
CR_05890C	orf19.6625	VPS75	-0.569246	2.3383e-17	-0.0310936	0.810881	-0.211074	0.00421497	0.538152	3.99566e-15	0.358171	2.28883e-07	-0.17998	0.0171019
C1_13150W	orf19.4942	orf19.4942	2.5351	3.28229e-07	2.50342	NA	-0.210977	0.8232	-0.0316822	0.972951	-2.74608	7.63328e-08	-2.7144	2.39403e-07
C2_03410W	orf19.880	orf19.880	0.281294	0.000728866	0.254544	0.00810437	-0.21	0.0221617	-0.0267501	0.857048	-0.491294	8.79087e-10	-0.464544	2.5014e-08
CR_04780W	orf19.6314	RPB8	0.280067	0.000578779	-0.0389632	0.79798	-0.209959	0.0180984	-0.319031	0.000120284	-0.490026	3.7055e-10	-0.170996	0.0620789
C5_01600C	orf19.6298	SPB4	0.577469	5.32665e-12	0.447652	1.50606e-06	-0.209126	0.0347388	-0.129817	0.217787	-0.786595	3.95505e-21	-0.656778	3.71462e-14
C5_01270W	orf19.1942	SGE1	0.333593	0.000689142	-0.319645	0.00538019	-0.208569	0.0592904	-0.653238	1.46443e-11	-0.542162	1.04965e-08	0.111076	0.373249
C4_02870C	orf19.2709	ZUO1	0.261513	7.28825e-05	0.295473	2.49357e-05	-0.208123	0.00268083	0.0339593	0.749512	-0.469637	1.12404e-13	-0.503596	2.919e-15
C7_03240W	orf19.5131	orf19.5131	-0.290905	0.000497015	-0.156976	0.146279	-0.207495	0.0211832	0.133929	0.185801	0.08341	0.402984	-0.0505189	0.652634
C1_05110C	orf19.4060	ARO4	0.146327	0.0380746	0.449412	1.32984e-11	-0.207081	0.00256587	0.303086	3.44497e-06	-0.353407	2.93281e-08	-0.656493	7.21696e-26
C4_04810C	orf19.3798	orf19.3798	0.44152	4.71693e-06	0.403739	0.000149977	-0.205901	0.0652544	-0.0377815	0.819097	-0.647421	7.10217e-12	-0.60964	3.58527e-10
C3_03000W	orf19.296	orf19.296	-2.49855	0.166784	-0.217634	NA	0.408516	NA	2.28092	0.254273	2.90707	0.0847352	0.62615	0.709997
C5_04910W	orf19.3978	orf19.3978	0.71513	4.72918e-11	0.30218	0.031579	-0.205604	0.140206	-0.41295	0.000357973	-0.920734	3.14587e-17	-0.507784	2.59767e-05
C2_00120C	orf19.1907	EMC9	-0.407254	1.0394e-07	0.100314	0.370155	-0.204851	0.0149275	0.507568	2.70142e-11	0.202403	0.0131492	-0.305164	0.000118022
C5_04870W	orf19.3973	orf19.3973	-0.402154	0.0122759	-0.314952	0.106922	-0.204785	0.270201	0.0872017	0.725533	0.197369	0.265334	0.110167	0.58854
C4_01050C	orf19.4684.2	RPL40B	0.242932	0.00403768	0.0633901	0.634891	-0.2037	0.0215373	-0.179542	0.0494137	-0.446632	1.85543e-08	-0.26709	0.00147689
C5_01450W	orf19.4135	PRC2	-0.825619	4.58307e-07	0.0728558	0.810822	-0.203529	0.315938	0.898475	4.91773e-08	0.62209	0.000192496	-0.276385	0.142056
C4_00170W	orf19.5642	orf19.5642	-0.425847	3.52011e-12	0.00211863	0.983724	-0.202816	0.00224203	0.427965	4.36049e-12	0.223031	0.000488641	-0.204935	0.00183484
C4_05310W	orf19.1789	orf19.1789	0.347108	0.00493688	-0.142215	0.447382	-0.201459	0.165308	-0.489322	9.06712e-05	-0.548567	3.79698e-06	-0.0592445	0.733542
C2_01690W	orf19.1480	orf19.1480	0.201412	0.0129659	0.107651	0.331635	-0.201329	0.017239	-0.0937612	0.351274	-0.40274	9.97119e-08	-0.308979	0.000100644
CR_03360W	orf19.2386	orf19.2386	0.567784	5.39784e-07	0.455699	0.000324433	-0.20115	0.143267	-0.112086	0.480789	-0.768934	5.3856e-12	-0.656849	1.25152e-08
CR_02740W	orf19.2832	INN1	-0.301824	0.000213414	-0.136923	0.213454	-0.200783	0.0231966	0.164901	0.0802889	0.101041	0.284244	-0.0638596	0.549218
C2_03100W	orf19.5788	EFT2	0.335495	3.14629e-07	0.170737	0.030722	-0.199255	0.00457255	-0.164758	0.0238194	-0.53475	4.32992e-17	-0.369992	1.47705e-08
C1_05520W	orf19.413	orf19.413	-1.12881	1.08656e-08	-0.679191	0.00309256	-0.199189	0.422619	0.449619	0.0641655	0.929621	3.68895e-06	0.480002	0.0315682
C5_00910C	orf19.1976	TRX2	0.619033	0.0115439	0.249348	0.501527	-0.198843	0.542789	-0.369685	0.191204	-0.817876	0.000594159	-0.448191	0.106378
C1_03110W	orf19.3003.1	RPL6	0.227748	0.000184053	0.145172	0.0463053	-0.198408	0.00165248	-0.0825762	0.275025	-0.426156	2.11394e-13	-0.34358	6.64691e-09
C2_04610C	snR189b	snR189b	2.36645	0.000141826	0.537544	NA	-0.19825	0.857289	-1.82891	0.00433958	-2.5647	4.46073e-05	-0.735793	0.387943
C5_02400W	orf19.4248	orf19.4248	-0.277074	4.48411e-05	-0.0689816	0.506215	-0.197744	0.0060441	0.208092	0.00385651	0.07933	0.319764	-0.128762	0.0914843
C1_03120W	orf19.3004	orf19.3004	-0.216701	0.00762405	-0.10727	0.342299	-0.197251	0.0207453	0.109432	0.269343	0.0194502	0.863786	-0.0899813	0.355691
CR_02150W	orf19.2615	MDL1	-0.352248	2.81473e-05	-0.221352	0.0289833	-0.197238	0.0332822	0.130896	0.209142	0.15501	0.0938605	0.0241136	0.84313
CR_03030C	orf19.2864.1	RPL28	0.17973	0.00322323	0.130128	0.0728982	-0.196471	0.00139465	-0.0496022	0.561767	-0.376201	4.16488e-11	-0.326599	1.75555e-08
C7_02570C	orf19.6452	RBP1	-0.0718004	0.297964	-0.283374	3.54364e-06	-0.329176	7.04367e-09	-0.211574	0.00038691	-0.257376	5.7815e-06	-0.045802	0.542943
C2_07890W	orf19.2193	PRS5	0.427945	3.29758e-05	0.378706	0.00106566	-0.196411	0.105921	-0.0492392	0.772511	-0.624356	5.73709e-10	-0.575117	3.6163e-08
C6_04490W	orf19.2133	LIP4	-0.557257	2.37363e-05	-0.107966	0.61621	-0.196404	0.210019	0.44929	0.00134866	0.360853	0.00882705	-0.0884377	0.616509
C2_04650C	orf19.145	RPB4	0.291644	0.000721252	-0.0975527	0.45219	-0.196375	0.0399971	-0.389197	6.83943e-06	-0.48802	3.90162e-09	-0.0988228	0.356627
C6_04120C	orf19.4557	orf19.4557	0.334627	0.000195387	-0.069511	0.6535	-0.196224	0.0556898	-0.404138	1.01592e-05	-0.530851	1.16447e-09	-0.126713	0.253027
C2_05160C	orf19.3547	orf19.3547	0.369985	1.37192e-05	0.395979	1.28229e-05	-0.195827	0.0392635	0.0259935	0.866673	-0.565812	7.06325e-12	-0.591805	1.29908e-12
CR_07670W	orf19.6283	orf19.6283	0.371411	0.000201111	0.027864	0.886243	-0.195141	0.0914302	-0.343547	0.000967334	-0.566552	5.15857e-09	-0.223005	0.0470967
C1_01160C	orf19.3304	orf19.3304	0.521038	5.67947e-07	0.427731	0.000258031	-0.195122	0.121868	-0.0933067	0.533709	-0.71616	3.18241e-12	-0.622854	5.69724e-09
C1_11640C	orf19.1155	DPP2	-0.307859	0.0173965	-0.336075	0.0262505	-0.195008	0.180429	-0.0282167	0.909456	0.11285	0.452831	0.141067	0.371186
C4_00600C	orf19.4183	MUC1	-0.561369	8.41994e-14	0.095782	0.396509	-0.194831	0.0213094	0.657151	2.82599e-18	0.366539	2.15071e-06	-0.290613	0.000267232
C5_00690C	orf19.567	TFB3	0.265354	0.0369026	0.157581	0.369585	-0.194424	0.178393	-0.107773	0.525319	-0.459778	0.000115042	-0.352005	0.00675043
C2_04760W	orf19.191	KIC1	-0.32715	8.48263e-05	0.0827287	0.518188	-0.194207	0.0334886	0.409879	8.3788e-07	0.132943	0.153613	-0.276936	0.00134012
C3_02700W	orf19.262	SMC3	0.267313	0.00371234	-0.220037	0.0493625	-0.19396	0.0560609	-0.48735	6.23442e-08	-0.461273	1.45329e-07	0.026077	0.843304
C5_03160W	orf19.4348	MED14	0.184103	0.0319219	-0.109575	0.350333	-0.193821	0.0298641	-0.293678	0.000454544	-0.377925	1.80308e-06	-0.0842464	0.412341
C1_11310C	orf19.671	PSP1	-0.362114	7.91288e-07	-0.0739022	0.521969	-0.193141	0.0164075	0.288212	0.000179917	0.168974	0.0328059	-0.119238	0.16928
C4_06210C	orf19.2917	orf19.2917	0.308287	3.758e-05	0.297097	0.000268486	-0.192786	0.0181529	-0.0111897	0.942722	-0.501073	3.93506e-12	-0.489883	2.43212e-11
C1_00030C	orf19.6113	orf19.6113	-2.35516	3.06079e-06	-0.70033	NA	-0.192522	0.769942	1.65483	0.00296347	2.16264	2.01135e-05	0.507808	0.375471
C1_08420W	orf19.387	GCR3	0.320512	3.36471e-06	0.0180895	0.89258	-0.192346	0.0110322	-0.302423	1.87689e-05	-0.512858	2.07929e-14	-0.210435	0.00455418
C2_04640C	orf19.144	SNU114	0.277203	0.0230925	0.0374796	0.868033	-0.191515	0.165897	-0.239723	0.0700689	-0.468717	4.51575e-05	-0.228994	0.0850389
C6_00200C	orf19.1179	NUO3	-0.193767	0.0270626	0.119958	0.297678	-0.191089	0.0350127	0.313725	0.000196816	0.00267756	0.983281	-0.311047	0.000217661
C1_05290W	orf19.437	GRS1	0.298256	0.000137502	0.0577838	0.660609	-0.190895	0.0261839	-0.240473	0.00350149	-0.489152	8.55646e-11	-0.248679	0.0023861
C1_01300W	orf19.3319	orf19.3319	-0.403977	7.3296e-09	0.112015	0.250655	-0.190715	0.0132529	0.515992	1.05272e-13	0.213263	0.00374608	-0.302729	2.80409e-05
C6_01630W	orf19.3423	TIF3	0.416454	1.12348e-10	0.192454	0.0130653	-0.189512	0.00778	-0.224	0.0012246	-0.605966	1.19427e-21	-0.381966	5.80119e-09
C2_05810W	orf19.5204	orf19.5204	0.303366	0.0209594	0.125313	0.532367	-0.188657	0.222607	-0.178053	0.253903	-0.492022	8.21024e-05	-0.313969	0.0260948
CR_02520W	orf19.172	RPC19	0.298174	0.00321778	0.112834	0.450859	-0.185403	0.106913	-0.18534	0.10641	-0.483577	6.02159e-07	-0.298237	0.00482845
CR_09560C	orf19.6606	orf19.6606	-1.98553	0.00263228	-0.82965	NA	-0.184558	0.831863	1.15588	0.157218	1.80097	0.00686044	0.645092	0.388314
CR_04050C	orf19.488	MEX67	0.459663	3.97045e-06	0.309732	0.00893056	-0.18199	0.130164	-0.149931	0.223828	-0.641653	5.68568e-11	-0.491721	1.98766e-06
CR_01540W	orf19.2540	SAS3	0.238275	0.0034025	-0.123371	0.276366	-0.1819	0.041842	-0.361646	8.08262e-06	-0.420175	5.98402e-08	-0.0585285	0.587989
C4_06790W	orf19.3130	orf19.3130	0.27223	0.00092063	0.227881	0.0176234	-0.181287	0.0473731	-0.0443493	0.732379	-0.453517	9.10878e-09	-0.409168	6.01918e-07
C5_05410C	orf19.4040	ILV3	0.435295	1.29309e-07	0.780838	5.73356e-21	-0.180885	0.0621821	0.345544	3.38364e-05	-0.616179	3.52511e-14	-0.961723	1.8827e-32
C4_07250C	orf19.3074	TLO10	-0.444423	0.000190737	0.00344934	0.985221	-0.180499	0.196666	0.447873	0.000213182	0.263924	0.0352274	-0.183949	0.176022
CR_02710W	orf19.2830	RRP9	0.514412	3.28431e-07	0.503586	3.80767e-06	-0.180277	0.138822	-0.0108262	0.961063	-0.694689	2.43102e-12	-0.683863	1.50618e-11
C1_07120W	orf19.4456	GAP4	-0.946049	8.50849e-58	-0.259315	0.000126037	-0.179441	0.007168	0.686733	1.2823e-30	0.766608	3.81615e-38	0.0798745	0.285811
C3_02180C	orf19.1626	orf19.1626	0.288467	0.000799043	0.226692	0.0244583	-0.178778	0.0611003	-0.061775	0.625593	-0.467245	1.46889e-08	-0.40547	1.88891e-06
C4_05540W	orf19.1235	HOM3	0.447035	1.13555e-08	0.488112	4.63491e-09	-0.178576	0.0489485	0.0410775	0.750425	-0.62561	4.7812e-16	-0.666688	1.56e-17
C1_03800W	orf19.1029	RPP1	0.41798	0.00041738	0.344414	0.0139618	-0.177853	0.222423	-0.0735665	0.68518	-0.595834	2.61029e-07	-0.522267	1.93502e-05
C5_00240W	orf19.971	SKN7	-2.10354	0.000197599	-0.248872	NA	-0.177665	0.807421	1.85467	0.00207812	1.92588	0.000718945	0.0712075	0.924302
C4_01370W	orf19.4650	ILV6	0.412071	2.29559e-05	-0.0441688	0.81136	-0.176312	0.126135	-0.456239	4.1353e-06	-0.588383	6.01871e-10	-0.132144	0.271161
C3_03440C	orf19.341	orf19.341	0.949267	6.97847e-14	-0.106141	0.646456	-0.176047	0.298837	-1.05541	4.20841e-16	-1.12531	7.20407e-19	-0.0699066	0.714756
C6_00970C	orf19.99	HAL21	-0.338024	0.0117852	-0.084502	0.705872	-0.176011	0.258009	0.253522	0.09131	0.162012	0.276838	-0.0915093	0.592717
C1_07840W	orf19.5054	orf19.5054	-0.241734	0.0020781	-0.316935	0.000186484	-0.175839	0.0379045	-0.0752009	0.493677	0.0658943	0.48364	0.141095	0.112345
C4_00410W	orf19.5669	orf19.5669	-0.843252	1.79824e-05	0.16317	0.595883	-0.175511	0.486332	1.00642	3.53681e-07	0.667741	0.000897665	-0.338681	0.122883
C2_06360C	orf19.5500	MAK16	0.341871	0.00165924	0.508751	7.27631e-06	-0.174504	0.175299	0.16688	0.18797	-0.516374	8.72475e-07	-0.683254	1.07454e-10
C5_04750C	orf19.3962	HAS1	0.578864	3.53798e-12	0.543637	1.02982e-09	-0.173954	0.078334	-0.0352275	0.808195	-0.752819	6.46383e-20	-0.717591	1.11946e-17
C1_06840C	orf19.6225.1	orf19.6225.1	0.341254	0.00762913	0.0160237	0.951422	-0.173436	0.262843	-0.32523	0.0168995	-0.51469	2.87144e-05	-0.189459	0.212737
C4_00570C	orf19.4186	PCT1	-0.223052	0.00111396	-0.0298561	0.811339	-0.173285	0.0175378	0.193196	0.00767516	0.0497673	0.555799	-0.143429	0.055566
C1_11610C	orf19.1159	orf19.1159	-0.216517	0.0185421	-0.100371	0.448553	-0.172376	0.0825588	0.116146	0.303876	0.0441402	0.702819	-0.0720059	0.53073
C1_07660W	orf19.2778	orf19.2778	1.04284	0.0440156	0.33971	NA	-0.172139	0.827334	-0.703127	0.230873	-1.21498	0.0162431	-0.511849	0.418342
C4_01720C	orf19.4622	orf19.4622	0.452916	6.3633e-09	0.150739	0.143505	-0.17194	0.0541416	-0.302177	0.000220798	-0.624856	3.10751e-16	-0.322679	6.60283e-05
C1_04180W	orf19.1052	orf19.1052	0.651097	3.00391e-17	-0.0444291	0.770511	-0.1717	0.0675515	-0.695526	9.55777e-19	-0.822797	1.28328e-26	-0.127271	0.199141
C1_13010W	orf19.4929	orf19.4929	0.410598	3.19605e-05	0.0364153	0.850153	-0.171489	0.150017	-0.374183	0.000273301	-0.582087	1.69031e-09	-0.207904	0.0688369
C1_06320W	orf19.177	orf19.177	0.506777	3.36036e-06	-0.0157882	0.947858	-0.170899	0.204224	-0.522565	2.93371e-06	-0.677676	2.62474e-10	-0.155111	0.252817
C6_03310W	orf19.5619	orf19.5619	-0.630124	8.41292e-19	0.0700724	0.545574	-0.170769	0.0361831	0.700196	9.86826e-23	0.459355	2.16371e-10	-0.240841	0.00174016
C4_03080W	orf19.2684	orf19.2684	0.413312	2.69896e-09	-0.107999	0.290975	-0.170619	0.0326924	-0.521311	8.64592e-14	-0.583931	1.4344e-17	-0.0626201	0.50336
C6_04410C	orf19.2124	orf19.2124	-1.16836	1.40311e-31	-0.108776	0.49169	-0.170531	0.160698	1.05959	1.3506e-25	0.997831	3.95536e-23	-0.0617549	0.656355
CR_03570C	orf19.4401	YVH1	0.366425	5.4327e-05	0.463544	1.66113e-06	-0.170209	0.113675	0.0971197	0.422458	-0.536634	1.43614e-09	-0.633754	2.39169e-12
CR_03420C	orf19.2379	NOT4	0.277121	0.000221259	0.097962	0.367173	-0.169973	0.0418826	-0.179159	0.0299271	-0.447095	6.47701e-10	-0.267935	0.000579235
C6_04240W	orf19.1082	orf19.1082	0.562048	0.000893869	0.433058	0.0321229	-0.169595	0.445049	-0.12899	0.5965	-0.731643	9.67468e-06	-0.602653	0.000583502
CR_08090W	orf19.6367	SSB1	0.450168	2.48321e-11	0.188176	0.0216398	-0.169544	0.0255918	-0.261993	0.000238509	-0.619712	8.82232e-21	-0.357719	1.93031e-07
C2_05070W	orf19.3538	FRE9	0.316562	0.0198675	-0.497657	0.000861848	-0.169148	0.292968	-0.814219	4.77323e-10	-0.485709	0.000165012	0.328509	0.025763
C1_04720W	orf19.772.1	orf19.772.1	-0.375394	6.50954e-05	-0.109793	0.433825	-0.168485	0.119765	0.265601	0.00962913	0.206909	0.0393738	-0.0586925	0.64408
C1_02390W	orf19.2926	orf19.2926	0.293001	0.00666125	-0.0752243	0.681135	-0.16749	0.18378	-0.368225	0.000799749	-0.460492	8.15748e-06	-0.0922662	0.504428
C6_02910W	orf19.5567	POP4	0.350596	0.0414797	0.296032	0.163408	-0.166591	0.427463	-0.0545641	0.84673	-0.517187	0.00146391	-0.462623	0.00731988
C3_02350W	orf19.1609	orf19.1609	0.64631	1.14152e-14	0.497647	6.93444e-08	-0.165812	0.10775	-0.148663	0.146691	-0.812122	2.1344e-22	-0.663459	1.77752e-14
C5_01430C	orf19.4133	orf19.4133	0.592688	2.85345e-09	0.224723	0.0856042	-0.165356	0.185131	-0.367965	0.000517197	-0.758044	1.83404e-14	-0.390079	0.000303208
C4_02430W	orf19.2760	orf19.2760	0.239352	0.0130136	-0.0618314	0.70028	-0.164574	0.123768	-0.301183	0.00181385	-0.403925	8.48115e-06	-0.102742	0.369081
C4_03380C	orf19.3365	DAO2	0.257168	0.0100472	0.199827	0.104983	-0.16364	0.153879	-0.057341	0.702267	-0.420808	9.30973e-06	-0.363467	0.000302852
C2_07160W	orf19.2270	SMF12	0.366989	1.49106e-07	0.0158457	0.912163	-0.163175	0.0408689	-0.351143	8.92032e-07	-0.530164	9.86215e-15	-0.179021	0.0217577
C2_04820W	orf19.182	orf19.182	0.580054	1.76132e-10	0.221146	0.0597565	-0.162382	0.150014	-0.358908	0.000191643	-0.742436	1.8929e-16	-0.383528	8.94081e-05
C5_02660C	orf19.4283	orf19.4283	0.382614	1.37744e-08	0.0749128	0.482975	-0.16238	0.036685	-0.307701	1.1238e-05	-0.544994	2.20307e-16	-0.237293	0.00121614
C3_01080W	orf19.2511.1	MRPL33	0.278765	0.00263601	0.0495969	0.762339	-0.162351	0.125395	-0.229168	0.0208836	-0.441116	6.72116e-07	-0.211948	0.0346927
C2_07020C	orf19.2258	orf19.2258	0.315509	0.0172666	-0.0264205	0.917579	-0.162144	0.309504	-0.34193	0.0133265	-0.477653	0.00015338	-0.135723	0.406073
C2_09320C	orf19.4093	PES1	0.403951	7.67762e-07	0.253006	0.00810437	-0.16147	0.088305	-0.150945	0.118958	-0.565421	1.44065e-12	-0.414476	5.41725e-07
C5_04360C	orf19.3922	orf19.3922	-0.403326	0.000485314	-0.232081	0.116088	-0.159165	0.248052	0.171246	0.237579	0.244161	0.0465449	0.0729154	0.641074
C7_02520W	orf19.6458	orf19.6458	-0.536562	9.48537e-05	-0.0214783	0.940326	-0.158649	0.351416	0.515083	0.000324878	0.377912	0.00805906	-0.137171	0.42762
C7_02390W	orf19.6470	AHP2	-0.599161	2.27635e-16	-0.288787	0.000622767	-0.158054	0.0616866	0.310374	9.67087e-05	0.441108	3.03363e-09	0.130734	0.138997
CR_06110C	orf19.3865	RFX1	-0.262413	0.0334588	-0.00740541	0.972572	-0.157855	0.260167	0.255007	0.0513007	0.104558	0.457087	-0.150449	0.281426
C2_07930C	orf19.2190	VRP1	-0.250707	0.0117678	0.0662003	0.680994	-0.157657	0.155398	0.316907	0.00139286	0.0930501	0.416227	-0.223857	0.0297748
C1_07600W	orf19.2785	ATP7	0.215576	0.00819765	-0.28321	0.00101471	-0.157554	0.0730294	-0.498786	5.94988e-11	-0.373131	1.12488e-06	0.125656	0.162042
C5_04700C	orf19.3955	MES1	0.351933	3.49179e-07	0.336615	7.14134e-06	-0.157539	0.0468063	-0.0153177	0.909777	-0.509472	5.22753e-14	-0.494154	9.91104e-13
C3_01680C	orf19.1676	orf19.1676	0.334432	0.00711028	0.0818568	0.702844	-0.157031	0.302219	-0.252576	0.0665084	-0.491464	3.94284e-05	-0.238888	0.0881821
CR_09120C	orf19.7308	TUB1	-1.89983	0.00187939	-1.21674	0.101983	-0.155947	0.865679	0.683091	0.385807	1.74389	0.00422331	1.06079	0.111851
C6_01390W	orf19.3445	HOC1	-0.418072	2.40906e-09	-0.111803	0.26008	-0.155614	0.0514193	0.306268	3.20451e-05	0.262458	0.000288301	-0.0438108	0.649928
C2_01220W	orf19.2002	orf19.2002	0.187855	0.0169856	0.0446361	0.733819	-0.154975	0.065222	-0.143219	0.0972062	-0.34283	2.98342e-06	-0.199611	0.0125551
C1_08090C	orf19.5081	FUN12	0.262917	0.000105426	0.115821	0.200663	-0.154218	0.0399832	-0.147095	0.0530755	-0.417135	1.77595e-10	-0.270039	8.88824e-05
C5_04640C	orf19.3949	orf19.3949	0.467237	4.07958e-11	0.149604	0.112363	-0.154176	0.0648959	-0.317633	1.79861e-05	-0.621413	7.08638e-19	-0.30378	5.85954e-05
C4_06530C	orf19.2882	XUT1	0.996832	0.00363721	0.18728	0.769036	-0.154064	0.769146	-0.809552	0.0284061	-1.1509	0.000674501	-0.341344	0.447361
C1_02710W	orf19.2960	FRS2	0.191345	0.0145428	0.160263	0.0886458	-0.153003	0.0723072	-0.0310825	0.805861	-0.344349	2.79248e-06	-0.313266	4.43559e-05
C6_02740W	orf19.5547	orf19.5547	0.172356	0.0455723	0.201012	0.0375234	-0.152913	0.097402	0.0286558	0.835305	-0.325269	4.17269e-05	-0.353925	1.40336e-05
C4_06850C	orf19.3124	orf19.3124	0.414004	1.65251e-07	0.403672	2.18298e-06	-0.151873	0.10409	-0.0103316	0.952052	-0.565877	3.16472e-13	-0.555546	2.24356e-12
C1_13360C	orf19.4962	RMP1	0.523225	0.000485585	0.285346	0.152875	-0.151715	0.449696	-0.237879	0.182752	-0.67494	4.61713e-06	-0.437061	0.00755709
C1_05650W	orf19.2487	orf19.2487	0.371003	0.00427794	0.214491	0.220728	-0.151309	0.354855	-0.156512	0.33714	-0.522312	3.25244e-05	-0.3658	0.00816027
C1_09650W	orf19.4828	orf19.4828	-0.808738	1.81688e-26	-0.287717	0.00117573	-0.15044	0.0936027	0.521021	7.5752e-11	0.658298	1.16284e-17	0.137277	0.135243
C2_01290C	tL(UAA)1	tL(UAA)1	-2.37149	0.0594156	0.517698	NA	-1.71343	NA	2.88919	0.0203481	0.658065	0.698205	-2.23113	0.0610926
C2_10090C	orf19.1772	orf19.1772	0.530586	2.64803e-08	0.344419	0.00201698	-0.149942	0.214676	-0.186167	0.0980784	-0.680528	6.06075e-13	-0.494361	8.47012e-07
C4_01770W	orf19.4616	POL30	0.369648	4.68043e-08	-0.151228	0.0817831	-0.149345	0.0545865	-0.520877	8.3622e-15	-0.518993	5.23306e-15	0.00188354	0.983801
C1_07920W	orf19.5064.1	orf19.5064.1	0.205708	0.0186343	-0.122682	0.303167	-0.149059	0.124493	-0.32839	0.00012887	-0.354767	1.53726e-05	-0.0263767	0.828486
C3_01560W	orf19.1687	orf19.1687	0.42894	6.33448e-07	0.372954	8.50907e-05	-0.149009	0.151761	-0.0559861	0.677876	-0.577949	8.09361e-12	-0.521963	1.98934e-09
C4_00970C	orf19.4697	MDN1	0.820467	6.1304e-26	0.296558	0.00118951	-0.148048	0.122852	-0.523909	5.75932e-11	-0.968515	1.15885e-35	-0.444606	5.86818e-08
C1_13510C	orf19.4982	TGL99	-0.336591	0.00114546	-0.0117729	0.951422	-0.147498	0.225745	0.324819	0.00266619	0.189093	0.0894472	-0.135725	0.268042
C2_08000C	orf19.2183	KRE30	0.346578	9.53718e-07	0.14772	0.108921	-0.145317	0.0778505	-0.198858	0.0101521	-0.491895	1.25602e-12	-0.293036	7.72218e-05
C1_01580W	orf19.3348	orf19.3348	0.28301	7.29727e-05	0.00725242	0.958745	-0.144644	0.0763091	-0.275758	0.000174754	-0.427654	6.3959e-10	-0.151896	0.0586053
C1_06760C	orf19.6234	orf19.6234	0.435771	7.47992e-06	0.552517	6.51232e-08	-0.144133	0.225321	0.116747	0.357669	-0.579903	1.11557e-09	-0.69665	3.4109e-13
C7_02040C	orf19.6514	CUP9	0.963576	1.02579e-17	0.491203	0.000176045	-0.143778	0.34935	-0.472373	6.72878e-05	-1.10735	7.76911e-23	-0.634981	1.39086e-07
C1_12390C	orf19.5225.2	RPL27A	0.29949	1.40014e-07	0.102478	0.177231	-0.143593	0.0225144	-0.197012	0.00104888	-0.443083	1.29814e-15	-0.246071	2.24474e-05
C1_07500C	orf19.2795	LHP1	0.271873	0.000379852	0.0547504	0.669904	-0.141608	0.10409	-0.217123	0.007327	-0.413481	2.00775e-08	-0.196358	0.0158121
C1_08630W	orf19.4721	orf19.4721	0.443671	0.000868239	0.289541	0.0793264	-0.141081	0.409414	-0.15413	0.369707	-0.584752	6.5404e-06	-0.430622	0.00189182
CR_01390W	orf19.2524	MGE1	0.440737	1.23544e-06	0.131016	0.31948	-0.140865	0.204224	-0.309722	0.00127705	-0.581602	6.83508e-11	-0.271881	0.00553639
C4_01440W	orf19.4641	NMT1	-0.189703	0.0120175	-0.164782	0.0656864	-0.140495	0.0862337	0.0249214	0.847029	0.0492074	0.590513	0.0242861	0.816509
C4_01270W	orf19.4660	RPS6A	0.491514	3.06374e-07	-0.0890145	0.567165	-0.140096	0.235727	-0.580528	1.46969e-09	-0.631609	2.0313e-11	-0.0510811	0.701896
C1_11440C	orf19.658	GIN1	0.367886	4.95478e-06	-0.0947785	0.443178	-0.139699	0.147407	-0.462665	1.06716e-08	-0.507585	1.18014e-10	-0.0449208	0.688974
CR_01610C	orf19.2549	SHP1	-0.188978	0.00604204	-0.0669738	0.511668	-0.13923	0.0604563	0.122004	0.118	0.0497475	0.549583	-0.0722566	0.378322
CR_07940W	orf19.604	orf19.604	0.310536	0.0351024	0.37252	0.0231731	-0.139205	0.440276	0.0619838	0.785614	-0.449742	0.0012571	-0.511725	0.000325071
C2_00540W	orf19.2073	orf19.2073	-0.288562	0.0025861	0.164697	0.180988	-0.139099	0.211462	0.453259	1.19705e-06	0.149464	0.152184	-0.303795	0.00175445
C2_07140W	orf19.2269	orf19.2269	-0.40687	2.04547e-11	-0.230605	0.000961086	-0.138275	0.0465664	0.176265	0.0100939	0.268595	1.62983e-05	0.0923299	0.214338
C3_01370C	orf19.1714	PGA44	-0.791103	0.000755444	0.192963	0.592257	-0.138218	0.663647	0.984066	2.70694e-05	0.652885	0.00634255	-0.331181	0.211202
C5_03400C	orf19.2639.1	orf19.2639.1	0.351943	7.01859e-06	-0.0834221	0.50076	-0.137157	0.14397	-0.435365	3.5868e-08	-0.4891	1.74024e-10	-0.0537354	0.618262
C2_05750W	orf19.6886	orf19.6886	0.710337	1.23936e-07	0.694493	1.63307e-06	-0.136565	0.450432	-0.0158435	0.956802	-0.846901	1.84264e-10	-0.831058	9.11158e-10
C6_04280W	orf19.1085	orf19.1085	-0.406893	4.40766e-09	-0.142829	0.114941	-0.135948	0.0923901	0.264064	0.000363054	0.270945	0.000141878	0.00688076	0.948332
C2_03160C	orf19.5779	RNR1	0.438917	3.20037e-08	0.01086	0.949114	-0.135269	0.156684	-0.428057	1.03751e-07	-0.574186	1.826e-13	-0.146129	0.112897
C6_04400W	orf19.2123	orf19.2123	-1.44265	5.22284e-31	-0.499606	0.000396916	-0.134797	0.400527	0.943045	6.52171e-13	1.30785	1.9025e-25	0.364809	0.00749589
C1_04970W	orf19.51	orf19.51	0.741474	3.70345e-07	0.0613862	0.834904	-0.134037	0.519575	-0.680088	7.88568e-06	-0.875511	1.66575e-09	-0.195423	0.310633
CR_05780W	orf19.6634	VMA2	-0.346966	1.93718e-06	-0.293142	0.000292985	-0.133996	0.113214	0.0538244	0.632018	0.21297	0.0049811	0.159146	0.0516316
C4_01020C	orf19.4686	orf19.4686	0.361589	0.000260285	0.00748294	0.969948	-0.132826	0.2844	-0.354107	0.000612052	-0.494415	3.23094e-07	-0.140309	0.250547
C6_03840C	orf19.5759	SNQ2	-0.547633	7.66852e-13	0.101553	0.370231	-0.132807	0.149135	0.649187	1.99316e-17	0.414827	9.22367e-08	-0.23436	0.00462227
C1_07150W	orf19.4450.2	orf19.4450.2	0.529089	0.000602434	0.249903	0.249504	-0.131991	0.534419	-0.279187	0.118134	-0.66108	1.31486e-05	-0.381893	0.027487
C4_05760W	orf19.1261	CGT1	0.239813	0.00212964	-0.00968117	0.951422	-0.131502	0.144775	-0.249495	0.00190252	-0.371315	7.00228e-07	-0.121821	0.176721
C1_04330W	orf19.1069	RPN4	0.322703	0.00508991	0.0287957	0.89258	-0.131282	0.346697	-0.293908	0.0147654	-0.453985	3.87774e-05	-0.160077	0.221746
C4_01330W	orf19.4654	orf19.4654	-2.31206	0.224209	1.37219	NA	-0.686945	NA	3.68425	0.0334222	1.62512	0.420554	-2.05913	0.172919
CR_06720W	orf19.706	NMD3	0.32873	1.41515e-05	0.47256	2.10427e-09	-0.130929	0.148357	0.14383	0.10004	-0.459659	5.12916e-10	-0.603489	5.18934e-16
C1_08430W	orf19.388	CAF16	-0.300471	0.000150669	-0.12068	0.274986	-0.130427	0.158509	0.179791	0.0448342	0.170044	0.0439059	-0.00974689	0.936398
CR_07720C	orf19.1988	CDC45	0.251766	0.00508825	-0.162666	0.172916	-0.130239	0.221416	-0.414432	3.50771e-06	-0.382005	9.12214e-06	0.0324273	0.802563
C4_02860W	orf19.2710	orf19.2710	-0.597792	2.42714e-18	-0.202785	0.0162095	-0.129748	0.111045	0.395007	4.73566e-08	0.468044	1.55246e-11	0.0730373	0.418726
CR_02050C	orf19.2606	HDA1	0.267062	3.73673e-06	0.116198	0.124508	-0.129565	0.0492588	-0.150865	0.0180748	-0.396627	1.92558e-12	-0.245762	4.41367e-05
C3_04060C	orf19.2803	HEM13	-0.897138	0.000765274	0.0450251	0.931852	-0.129474	0.733254	0.942163	0.000476428	0.767663	0.00422331	-0.174499	0.611106
C1_13680C	orf19.5006	GCV3	0.631763	0.0468976	0.414195	0.338507	-0.128188	0.780857	-0.217568	0.616583	-0.75995	0.0136838	-0.542382	0.117332
C1_12350W	orf19.5229	orf19.5229	0.359418	9.96671e-07	0.222459	0.0106996	-0.127633	0.148315	-0.136959	0.115912	-0.487052	1.33365e-11	-0.350093	3.58297e-06
C5_03110C	orf19.4340.1	orf19.4340.1	0.299815	0.00683157	0.104783	0.5404	-0.127625	0.351416	-0.195032	0.121232	-0.42744	5.97015e-05	-0.232408	0.0557555
C1_05160C	orf19.449	orf19.449	-0.481004	1.62176e-05	-0.391238	0.00191382	-0.127389	0.363366	0.0897666	0.593596	0.353616	0.00194485	0.263849	0.0319249
C1_12600C	orf19.3756	CHR1	0.339657	0.00310909	0.333524	0.0101588	-0.127104	0.371549	-0.00613378	0.981535	-0.466761	2.4748e-05	-0.460628	5.10327e-05
C1_06960W	orf19.6213	SUI2	0.19829	0.00533236	0.162617	0.0516778	-0.126907	0.107316	-0.0356729	0.748142	-0.325197	1.40442e-06	-0.289524	2.9506e-05
C1_00830W	orf19.6023	orf19.6023	-0.549841	4.76712e-07	-0.083553	0.6535	-0.125614	0.363172	0.466288	4.92357e-05	0.424228	0.000138967	-0.0420607	0.789516
C2_02190C	orf19.1535	orf19.1535	0.335884	0.0125903	-0.0200963	0.940872	-0.125407	0.460943	-0.355981	0.010911	-0.461291	0.000351975	-0.105311	0.538058
C1_08100W	orf19.5083	DRG1	0.17588	0.0204081	0.175929	0.0426177	-0.124896	0.13605	4.92629e-05	0.999929	-0.300776	2.2243e-05	-0.300826	3.61717e-05
C1_10670C	orf19.1839	RPA190	0.45132	2.08383e-09	0.245242	0.00526683	-0.124869	0.170866	-0.206078	0.0135234	-0.576189	7.70888e-15	-0.370111	1.56958e-06
C4_04650W	orf19.3817	orf19.3817	0.328173	0.000790446	0.153649	0.264048	-0.124357	0.313113	-0.174524	0.126089	-0.45253	2.0609e-06	-0.278006	0.00905841
C4_02850W	orf19.2711	orf19.2711	0.251283	0.00150206	0.276502	0.0013079	-0.123939	0.178577	0.0252189	0.856972	-0.375222	8.05927e-07	-0.400441	2.24945e-07
C5_01340W	orf19.1934	HST3	0.301189	2.06966e-05	-0.216442	0.010348	-0.122182	0.146366	-0.517631	1.19825e-13	-0.423371	8.2617e-10	0.0942601	0.280428
CR_07080W	orf19.1815	orf19.1815	0.319982	6.32601e-05	0.716247	7.85008e-20	-0.12189	0.201099	0.396265	5.08647e-07	-0.441872	1.27891e-08	-0.838137	3.14262e-28
CR_02990C	orf19.2862	RIB1	0.311107	7.21225e-06	-0.415229	2.77574e-08	-0.121338	0.140206	-0.726336	9.17971e-27	-0.432444	1.65861e-10	0.293892	5.55415e-05
C2_01740C	orf19.1485	orf19.1485	0.433101	1.50686e-09	-0.0538354	0.677177	-0.119964	0.178393	-0.486936	2.40114e-11	-0.553065	6.29628e-15	-0.0661283	0.497348
C1_01680C	orf19.3357	orf19.3357	0.390981	8.83337e-06	-0.0408317	0.805301	-0.119751	0.271227	-0.431813	1.19705e-06	-0.510732	2.94239e-09	-0.0789188	0.4884
C2_02060C	orf19.1523	FMO1	0.551098	0.0301463	-0.511429	0.102508	-0.119018	0.736285	-1.06253	1.75541e-05	-0.670116	0.0062862	0.392411	0.173883
C2_09670C	orf19.1387	orf19.1387	-0.406207	1.75282e-07	-0.0223578	0.881727	-0.118924	0.205676	0.383849	1.48915e-06	0.287283	0.000306611	-0.0965664	0.313825
C2_08550C	orf19.3624	MSU1	0.683791	4.32829e-11	0.282587	0.031579	-0.118523	0.401566	-0.401203	0.000266849	-0.802314	8.11998e-15	-0.401111	0.000406662
CR_07370W	orf19.6132	orf19.6132	0.748005	3.54451e-25	0.420694	1.67493e-07	-0.118433	0.198591	-0.327311	1.87021e-05	-0.866438	2.7549e-33	-0.539128	6.68802e-13
C3_03260W	orf19.325	orf19.325	0.191786	0.0140594	0.0733147	0.528318	-0.117975	0.182313	-0.118472	0.187449	-0.309761	2.60153e-05	-0.191289	0.0172128
C4_03700W	orf19.1308	orf19.1308	0.577118	2.91456e-05	0.314684	0.0779633	-0.117092	0.545562	-0.262434	0.101487	-0.69421	3.75109e-07	-0.431775	0.00451287
C6_03940C	orf19.5771	PBP2	0.606292	3.52676e-19	0.183819	0.0343056	-0.116997	0.171795	-0.422473	1.43819e-09	-0.723289	9.63553e-27	-0.300816	4.44306e-05
C4_06410W	orf19.2893	orf19.2893	0.569697	0.0378731	0.139996	0.772625	-0.116882	0.768012	-0.4297	0.163191	-0.686579	0.00988397	-0.256878	0.450003
C4_01220C	orf19.4668	orf19.4668	-1.25907	2.33791e-15	0.353772	0.0653671	-0.11674	0.582789	1.61284	1.16579e-24	1.14233	9.6568e-13	-0.470512	0.00417393
C1_07620C	orf19.2783	PIR32	0.843067	0.015293	-0.0759326	0.914126	-0.116662	0.832808	-0.919	0.0131032	-0.959729	0.00499215	-0.0407295	0.941466
C4_01530C	orf19.4631	ERG251	-1.66216	9.63669e-13	0.331052	0.331678	-0.116347	0.73983	1.99321	6.31476e-18	1.54581	3.19923e-11	-0.447399	0.0961235
C5_02310C	orf19.4239	orf19.4239	-0.362709	0.000551186	-0.0979891	0.552628	-0.116312	0.371929	0.26472	0.021442	0.246397	0.0242157	-0.0183229	0.906204
C1_10690W	orf19.2352	orf19.2352	0.199626	0.0279558	0.0327087	0.841383	-0.115982	0.269681	-0.166918	0.0918676	-0.315608	0.000217066	-0.14869	0.134455
C6_02140W	orf19.3453	orf19.3453	-0.352607	0.000136596	-0.214925	0.0631834	-0.11584	0.306853	0.137682	0.239888	0.236767	0.0140593	0.0990852	0.39849
CR_01310W	orf19.3223	ATP3	0.24315	0.000322764	-0.215237	0.00434752	-0.115072	0.138174	-0.458387	1.43617e-12	-0.358222	3.73836e-08	0.100165	0.196248
C4_02020W	orf19.4591	CAT2	-0.916822	0.0193328	-0.524818	0.321214	-0.114484	0.838505	0.392004	0.461715	0.802338	0.0425526	0.410334	0.373503
C2_08480W	orf19.3630	RRP8	0.682938	1.31588e-14	0.307092	0.00387555	-0.113879	0.333387	-0.375846	6.01392e-05	-0.796817	1.77274e-19	-0.420971	9.0668e-06
C4_02500C	orf19.2752	ADR1	-0.0534385	0.744498	-0.286868	0.039714	-0.172277	0.201104	-0.23343	0.077099	-0.118838	0.375621	0.114591	0.434349
C6_00280W	orf19.1187	CPH2	-0.151	0.045696	0.0323957	0.801307	-0.113108	0.166162	0.183396	0.0152366	0.0378919	0.677507	-0.145504	0.0574405
C3_02170C	orf19.1628	LAP41	-0.231086	0.00748388	-0.295186	0.0013038	-0.11183	0.265553	-0.0641001	0.603035	0.119257	0.203753	0.183357	0.0431519
C1_12230W	orf19.5241	SNT1	0.226958	0.011156	0.103393	0.405878	-0.110738	0.28999	-0.123565	0.240539	-0.337696	6.81143e-05	-0.214131	0.0193726
C3_01980C	orf19.1650	TOM6	0.23377	0.00853864	-0.158476	0.163649	-0.110359	0.296571	-0.392246	5.97902e-06	-0.344129	4.87423e-05	0.0481175	0.682072
C4_05180C	orf19.748	orf19.748	0.232541	0.00130755	0.0840715	0.429483	-0.110179	0.196894	-0.148469	0.0672998	-0.34272	8.78716e-07	-0.19425	0.0113821
C6_02960W	orf19.5574	orf19.5574	0.402859	0.000110697	0.212923	0.112377	-0.109904	0.418604	-0.189936	0.118763	-0.512763	5.10763e-07	-0.322827	0.00367955
CR_02030C	orf19.2604	orf19.2604	0.355517	0.0014249	0.246014	0.0707983	-0.109604	0.443843	-0.109503	0.46624	-0.465121	1.71356e-05	-0.355618	0.00199166
C5_04280C	orf19.3912	GLN3	-0.268602	0.00174543	0.0355937	0.818439	-0.109521	0.284718	0.304196	0.00045984	0.159082	0.0810806	-0.145114	0.129964
C2_03770C	orf19.844	STE11	-1.06259	5.1377e-39	-0.220055	0.030664	-0.109235	0.292968	0.842531	3.47852e-24	0.95335	2.06806e-31	0.110819	0.27691
C1_07100C	orf19.6194	orf19.6194	-0.721321	7.4217e-12	-0.159728	0.295522	-0.109137	0.424574	0.561593	4.63644e-07	0.612184	9.21898e-09	0.0505908	0.736239
C3_01430W	orf19.1708	orf19.1708	0.472603	0.000234735	0.320595	0.0425059	-0.109037	0.534461	-0.152008	0.360525	-0.581639	4.07003e-06	-0.429632	0.00165033
C2_06390C	orf19.18	IMH3	0.322291	5.50502e-06	0.186689	0.0274094	-0.108223	0.202581	-0.135602	0.100613	-0.430515	4.7789e-10	-0.294913	4.06519e-05
C3_04030C	orf19.2805	PEX8	-0.334659	0.00187517	-0.478817	3.70928e-05	-0.108156	0.420783	-0.144158	0.297718	0.226503	0.0436497	0.370661	0.000974528
C6_03100W	orf19.5595	SHE3	-1.84878	1.84639e-146	-0.060103	0.625132	-0.107711	0.235338	1.78867	3.62139e-136	1.74107	1.38537e-129	-0.0476082	0.634601
C5_05140W	orf19.4006	orf19.4006	0.236263	0.0169856	-0.0474849	0.787532	-0.107628	0.371549	-0.283748	0.00495225	-0.343891	0.0002598	-0.060143	0.641521
C2_05270W	orf19.3556	orf19.3556	0.264778	0.000300474	0.276728	0.000512442	-0.107455	0.218172	0.0119507	0.935961	-0.372233	1.52324e-07	-0.384184	1.00372e-07
C3_02630C	orf19.254	orf19.254	-0.322667	0.00995578	-0.0764017	0.71889	-0.106338	0.500132	0.246265	0.077832	0.21633	0.100127	-0.0299359	0.86654
C4_05620C	orf19.1247	orf19.1247	0.233358	0.0204561	0.230888	0.0523489	-0.105713	0.395813	-0.00246998	0.991575	-0.339071	0.000408504	-0.336601	0.000894328
C1_09960W	orf19.4862.2	PET100	0.259512	0.00226519	0.137238	0.232975	-0.105162	0.313774	-0.122274	0.233379	-0.364674	8.68295e-06	-0.2424	0.00676869
C2_08380C	orf19.1434	orf19.1434	0.355356	0.000148256	0.0914664	0.540282	-0.104719	0.385092	-0.263889	0.00879974	-0.460074	5.16448e-07	-0.196185	0.0650575
C6_02680W	orf19.5539	orf19.5539	-0.355097	0.00333219	-0.34295	0.0145547	-0.104337	0.498902	0.0121465	0.963154	0.25076	0.0459038	0.238613	0.0755365
C2_03240C	orf19.906	ROM2	-0.430995	2.3157e-07	-0.0567478	0.699997	-0.104	0.319044	0.374247	1.52196e-05	0.326994	0.000115434	-0.0472527	0.680832
CR_08150W	orf19.6375	RPS20	-0.139819	0.0236538	-0.0315795	0.758162	-0.103578	0.120764	0.108239	0.108043	0.0362401	0.625432	-0.0719989	0.298505
C2_03300W	orf19.898	HEM2	0.210601	0.028646	-0.0235318	0.89258	-0.103346	0.366856	-0.234133	0.0178194	-0.313947	0.000539787	-0.0798141	0.492666
C1_10590W	snR62	snR62	-2.22064	NA	-1.44733	NA	-1.67303	NA	0.773314	0.845307	0.54761	0.864441	-0.225704	NA
CR_03590C	orf19.4383	orf19.4383	-0.744562	0.00471351	-0.232867	0.564137	-0.102914	0.781672	0.511695	0.091633	0.641648	0.0162848	0.129953	0.708938
C1_04780C	orf19.764	orf19.764	-0.270932	0.00797783	0.0409479	0.822078	-0.102849	0.411232	0.31188	0.0026825	0.168083	0.121123	-0.143796	0.214446
C6_00980C	orf19.100	orf19.100	-0.321602	0.0198675	-0.0363062	0.885915	-0.102032	0.559588	0.285296	0.0573193	0.21957	0.130225	-0.0657255	0.716567
CR_02610C	orf19.2820	orf19.2820	0.151514	0.0426353	0.187788	0.0238104	-0.101847	0.226192	0.0362749	0.746717	-0.253361	0.00026572	-0.289636	4.74167e-05
C5_00560W	orf19.933	UBC13	-0.0428991	0.645195	-0.287471	0.000122756	0.0238515	0.819138	-0.244572	0.00061346	0.0667507	0.410688	0.311322	7.39173e-06
C3_04220C	orf19.5864	URK1	-0.26729	0.0118087	0.182806	0.167053	-0.100317	0.441606	0.450096	1.00546e-05	0.166973	0.137801	-0.283123	0.00801387
C1_12310C	orf19.5232	CSI2	0.614711	3.01119e-09	0.413402	0.000439552	-0.0995415	0.483819	-0.20131	0.100634	-0.714253	3.51334e-12	-0.512943	1.88847e-06
C4_05590W	orf19.1240	orf19.1240	0.779079	1.26384e-19	0.0496109	0.769705	-0.0985929	0.408471	-0.729468	9.1377e-17	-0.877672	1.78383e-24	-0.148204	0.174287
CR_06810W	orf19.1853	HHT2	0.689612	3.52587e-12	-0.290204	0.0158466	-0.0984922	0.46067	-0.979816	1.58114e-23	-0.788104	1.07589e-15	0.191712	0.0969326
C7_03000C	orf19.5161	orf19.5161	0.410359	5.74414e-05	0.0254158	0.898802	-0.0968442	0.476798	-0.384943	0.000270757	-0.507203	4.03688e-07	-0.12226	0.338505
C1_12290C	orf19.5234	RBD1	-0.495023	2.04547e-11	-0.438014	5.76146e-08	-0.0963975	0.302219	0.0570082	0.626944	0.398625	9.52984e-08	0.341617	1.21139e-05
C6_01820C	orf19.3402	FPG1	-0.356152	2.81503e-06	-0.000333232	0.997318	-0.0961638	0.309504	0.355819	5.15121e-06	0.259988	0.000831108	-0.0958306	0.30445
C4_01140C	orf19.4676	orf19.4676	0.266456	0.0289145	-0.404006	0.00284507	-0.0958761	0.53572	-0.670462	9.64575e-09	-0.362332	0.00183937	0.30813	0.0172402
C1_09240C	orf19.4783	orf19.4783	0.837341	0.00356866	-0.24463	0.61621	-0.0958739	0.832978	-1.08197	0.000268664	-0.933215	0.00096163	0.148756	0.717186
CR_01740W	orf19.2570	MCI4	0.15684	0.0452026	0.177719	0.0443531	-0.095537	0.285825	0.0208797	0.874571	-0.252377	0.000533719	-0.273256	0.000259733
C6_02350C	orf19.3477	orf19.3477	0.439893	8.02196e-07	0.322597	0.00151556	-0.0951623	0.420674	-0.117297	0.307797	-0.535056	1.14132e-09	-0.417759	5.88346e-06
C5_01980C	orf19.3173	orf19.3173	-0.378525	3.66828e-05	-0.0849587	0.559719	-0.0947699	0.418212	0.293566	0.00254949	0.283755	0.00244478	-0.00981119	0.943537
C7_04080C	orf19.7167	orf19.7167	-2.19362	NA	0.349707	NA	-1.87302	NA	2.54333	NA	0	NA	-2.22272	NA
C6_03430C	orf19.5702	orf19.5702	-0.270311	0.000846718	-0.0370079	0.803796	-0.0946395	0.34089	0.233303	0.00678962	0.175672	0.0384588	-0.0576316	0.586292
C2_07910C	orf19.2191.1	orf19.2191.1	0.224779	0.0414283	-0.0550702	0.769129	-0.0945973	0.485255	-0.27985	0.0118911	-0.319377	0.00212878	-0.0395272	0.787371
C2_09180W	orf19.4080	orf19.4080	0.310152	0.0341759	-0.0974074	0.696187	-0.094277	0.629041	-0.407559	0.00664451	-0.404429	0.00399266	0.00313041	0.987101
C6_02470W	orf19.5516	orf19.5516	0.187718	0.00858058	-0.0746621	0.47268	-0.0940668	0.260167	-0.262381	0.000195328	-0.281785	3.30942e-05	-0.0194047	0.843562
C1_06930W	orf19.6217	PGA63	-0.368482	0.000151747	0.00635708	0.971712	-0.0937885	0.452484	0.374839	0.000169666	0.274693	0.00585528	-0.100146	0.405756
C5_01700W	orf19.3205	MPRL36	0.269152	0.00443992	-0.0626853	0.700486	-0.0932198	0.437336	-0.331837	0.000548559	-0.362372	7.12015e-05	-0.0305345	0.820538
C1_08290C	orf19.5106	DIP2	0.686731	7.12468e-11	0.423934	0.000435725	-0.0931071	0.528406	-0.262797	0.0274752	-0.779838	9.71555e-14	-0.517041	2.86181e-06
C1_00780C	orf19.6028	HGC1	-3.86012	0	0.0379506	0.751265	-0.0927881	0.258041	3.89807	0	3.76733	0	-0.130739	0.0841429
C2_09170W	orf19.4079	SLP2	0.35578	6.945e-05	0.128187	0.317518	-0.0927285	0.424712	-0.227593	0.0200584	-0.448509	3.01705e-07	-0.220915	0.0243561
C2_07960C	orf19.2185	NSA1	0.615486	4.05052e-10	0.499018	3.92448e-06	-0.0926863	0.496553	-0.116468	0.380127	-0.708173	4.2728e-13	-0.591705	4.83098e-09
C5_01690C	orf19.3206	CCT7	0.163199	0.0141583	0.0707666	0.456875	-0.0926479	0.223579	-0.0924321	0.237255	-0.255847	4.6081e-05	-0.163414	0.0163198
C6_00030W	orf19.6337	TLO13	-0.30232	0.0305108	-0.065425	0.786839	-0.0924883	0.602971	0.236895	0.131204	0.209832	0.151448	-0.0270633	0.892285
C6_00160W	orf19.6321	PGA48	1.30307	1.21729e-57	0.77482	1.08528e-18	-0.0924651	0.425112	-0.528245	2.28898e-10	-1.39553	2.88163e-65	-0.867285	2.78e-24
C1_07680W	orf19.1228	HAP2	0.666656	1.23462e-09	-0.250892	0.081894	-0.092005	0.547871	-0.917548	7.67708e-17	-0.758661	3.07469e-12	0.158887	0.248492
C3_01350C	orf19.1716	URA3	0.491279	1.20317e-08	-0.057176	0.719854	-0.0915674	0.428034	-0.548455	3.65826e-10	-0.582846	8.40421e-12	-0.0343914	0.788847
C4_01240C	orf19.4665	orf19.4665	-0.464216	2.04972e-06	-0.0465607	0.799138	-0.0915636	0.476223	0.417655	3.73556e-05	0.372652	0.00016832	-0.0450029	0.741468
C3_00760W	orf19.5379	ERG4	-0.72016	1.85218e-22	-0.0890317	0.436681	-0.0912996	0.341284	0.631128	4.06215e-17	0.628861	2.60346e-17	-0.00226787	0.982899
C3_03910W	orf19.6924	HTA1	0.631496	9.32151e-24	0.00997977	0.941294	-0.0910435	0.259128	-0.621516	7.35682e-23	-0.722539	8.23765e-31	-0.101023	0.190081
CR_03050C	orf19.2423	ZCF11	0.495124	1.0204e-06	0.107625	0.505336	-0.0908783	0.514112	-0.3875	0.000265282	-0.586003	4.71808e-09	-0.198503	0.095449
C1_05080W	orf19.4063	GPT1	0.498282	0.038357	0.235118	0.503253	-0.0905572	0.795067	-0.263164	0.370731	-0.588839	0.0114771	-0.325676	0.230932
C6_00360C	orf19.1198	orf19.1198	0.396689	0.000148148	0.115487	0.475429	-0.0903889	0.523974	-0.281202	0.0132974	-0.487078	2.09332e-06	-0.205876	0.0884421
C4_06890W	orf19.3122	ARR3	0.37702	0.0251598	0.633325	0.000279292	-0.0900956	0.701331	0.256305	0.165821	-0.467115	0.00415812	-0.72342	7.7929e-06
C5_04570C	orf19.3941	URA7	0.330194	2.16138e-06	0.188767	0.0235434	-0.0890126	0.306255	-0.141427	0.0795423	-0.419207	8.08952e-10	-0.27778	9.96453e-05
C4_03930C	orf19.789.1	orf19.789.1	0.373143	0.0129348	0.159476	0.465101	-0.0882409	0.665929	-0.213667	0.224217	-0.461384	0.00146109	-0.247717	0.137018
C4_03030C	orf19.2688	NAN1	0.525762	7.7548e-09	0.378062	0.000193237	-0.0875881	0.476066	-0.1477	0.188205	-0.61335	9.25432e-12	-0.46565	5.68141e-07
C6_03200W	orf19.5607	EMF1	0.368473	3.34451e-05	0.0641427	0.680844	-0.0873918	0.460404	-0.30433	0.0011602	-0.455864	1.74218e-07	-0.151535	0.151509
C6_00370C	orf19.1199	NOP5	0.527822	1.36241e-16	0.238135	0.00120212	-0.0871394	0.285739	-0.289687	1.571e-05	-0.614962	2.78773e-22	-0.325275	9.00073e-07
C3_00520W	orf19.5411	orf19.5411	-1.04114	0.00113289	-0.186109	0.727455	-0.0870308	0.850466	0.855027	0.0150132	0.954105	0.00302726	0.0990778	0.820538
C3_00890C	orf19.6166	orf19.6166	-0.28616	0.00043531	-0.146508	0.171199	-0.0863041	0.398254	0.139652	0.150512	0.199856	0.0176349	0.0602037	0.571224
C1_07880C	orf19.5059	GCS1	0.418454	5.18711e-05	0.0966661	0.566526	-0.0850851	0.548544	-0.321788	0.00349561	-0.503539	7.39522e-07	-0.181751	0.137456
C2_04960C	orf19.3528	orf19.3528	0.617	1.35772e-11	0.303935	0.00665922	-0.0848574	0.514112	-0.313065	0.00148467	-0.701857	1.24836e-14	-0.388792	9.58145e-05
C3_07560W	orf19.6734	TCC1	0.232148	0.038919	-0.00539651	0.978734	-0.0845352	0.549401	-0.237544	0.0433431	-0.316683	0.00298966	-0.0791387	0.568565
C1_08560W	orf19.401	TCP1	0.25031	0.00147227	0.27402	0.00162254	-0.0845175	0.398143	0.0237101	0.865897	-0.334828	1.1398e-05	-0.358538	5.30144e-06
C5_01580C	orf19.4152	CEF3	0.245672	0.000701423	0.232078	0.00370617	-0.0831862	0.34935	-0.0135945	0.923505	-0.328858	2.66257e-06	-0.315264	9.1216e-06
CR_07320C	orf19.6136	orf19.6136	0.831657	1.42672e-16	0.504378	7.24667e-06	-0.0831788	0.563402	-0.327279	0.0029005	-0.914835	7.53724e-20	-0.587557	2.25661e-08
C4_02680C	orf19.2731	orf19.2731	0.618731	8.16201e-06	0.342483	0.0543162	-0.082992	0.690741	-0.276248	0.0847333	-0.701723	3.45149e-07	-0.425475	0.00579618
C1_02410C	orf19.2928	orf19.2928	0.193761	0.0492334	-0.390449	0.000127769	-0.0828273	0.493158	-0.58421	1.48905e-10	-0.276588	0.00287062	0.307622	0.00168827
C5_01140C	orf19.1956	orf19.1956	0.270007	0.00159282	0.0230022	0.886665	-0.0823524	0.44914	-0.247005	0.00561359	-0.35236	2.07434e-05	-0.105355	0.298543
C4_05740C	orf19.1259	orf19.1259	0.261446	0.000456715	-0.0870239	0.430119	-0.0819375	0.382563	-0.34847	2.76143e-06	-0.343384	2.14008e-06	0.00508639	0.962242
C6_03140C	orf19.5599	MDL2	0.356964	2.34278e-07	-0.10209	0.308023	-0.0815358	0.359132	-0.459053	2.71932e-11	-0.438499	1.08278e-10	0.0205539	0.83943
C4_01320C	orf19.4655	OPT6	-2.5745	7.35425e-164	0.0189076	0.912163	-0.0813742	0.469299	2.59341	5.14961e-163	2.49313	1.05733e-152	-0.100282	0.344074
C5_01650C	orf19.6294	MYO1	-0.411542	6.2385e-08	-0.231056	0.0103599	-0.0812042	0.410431	0.180486	0.0383845	0.330338	1.72425e-05	0.149851	0.0854081
C3_03580C	orf19.356	GTT13	-2.18123	NA	-0.626655	NA	0.0730119	NA	1.55458	0.645957	2.25424	0.363702	0.699667	NA
CR_07190W	orf19.730	orf19.730	-0.241446	0.00434821	0.00327111	0.982603	-0.080645	0.445253	0.244717	0.00517769	0.160801	0.0694488	-0.0839161	0.41353
C2_05140W	orf19.3545	CDC15	-0.378915	0.000276712	-0.198172	0.143143	-0.080374	0.560254	0.180743	0.149531	0.298541	0.00493604	0.117798	0.360014
C5_01910W	orf19.3182	GIS2	0.390697	5.22932e-09	0.0500355	0.666223	-0.0795328	0.357852	-0.340661	6.40458e-07	-0.47023	1.05925e-12	-0.129568	0.0938596
C7_03270W	orf19.5126	orf19.5126	0.477937	2.06221e-13	0.152832	0.0680742	-0.0795273	0.351824	-0.325105	1.52304e-06	-0.557464	5.96651e-18	-0.232359	0.000946595
C2_09430W	orf19.1601	RPL3	0.221034	0.00361597	0.15226	0.0967416	-0.0792106	0.395111	-0.0687745	0.50712	-0.300245	3.80482e-05	-0.23147	0.00227349
C5_05480W	orf19.4048	DES1	-0.472576	1.17836e-05	0.253526	0.0532306	-0.0791408	0.587089	0.726102	4.5879e-12	0.393436	0.000291456	-0.332667	0.00299502
C1_12970C	orf19.4928	SEC2	-0.318132	0.00394646	-0.167475	0.263222	-0.0784712	0.58593	0.150657	0.270594	0.239661	0.0346686	0.0890042	0.523902
C5_02920W	orf19.4316	orf19.4316	-0.321193	0.00762913	-0.122146	0.497462	-0.0783363	0.622177	0.199047	0.159302	0.242857	0.0502895	0.0438097	0.792713
C7_02840C	orf19.5178	ERG5	-0.487642	0.0345247	0.0479415	0.909883	-0.0781988	0.80877	0.535584	0.0252751	0.409443	0.0802936	-0.12614	0.660959
C1_03300C	orf19.3026	MAS1	0.329001	0.000256862	0.0549469	0.727455	-0.0781336	0.512608	-0.274054	0.00380257	-0.407135	3.62723e-06	-0.133081	0.208594
C1_12610W	orf19.3755	orf19.3755	0.219809	0.00817922	-0.102189	0.387714	-0.0774375	0.460231	-0.321998	9.29926e-05	-0.297247	0.000195037	0.024751	0.832171
CR_09430C	orf19.7340	orf19.7340	-2.17904	NA	-0.0522526	NA	-2.82023	NA	2.12679	0.55646	-0.641188	0.868519	-2.76797	NA
C7_00510W	orf19.7068	MAC1	-2.29477	0.00033884	-0.481456	NA	-0.0774082	0.93615	1.81331	0.00963181	2.21736	0.000508935	0.404048	0.586733
C4_01080W	orf19.4681	RAT1	0.558581	4.33793e-08	0.204902	0.134292	-0.0773513	0.592687	-0.353679	0.00115684	-0.635932	3.15604e-10	-0.282253	0.0130816
C2_00710W	orf19.2055	NPL6	0.359041	1.17345e-06	0.0623801	0.616158	-0.077288	0.428012	-0.296661	0.000116813	-0.436329	2.00863e-09	-0.139668	0.105884
C6_01960W	orf19.687	orf19.687	-0.260986	0.0125977	-0.0710913	0.677184	-0.0770538	0.564365	0.189895	0.105848	0.183933	0.0910624	-0.00596252	0.967432
C5_02010C	orf19.3170	orf19.3170	0.351222	5.97592e-06	0.32569	0.000141659	-0.0749565	0.469815	-0.025532	0.856852	-0.426178	2.32274e-08	-0.400646	3.7189e-07
C1_02370C	orf19.3694	orf19.3694	0.765462	1.02338e-08	-0.0230602	0.938874	-0.0745041	0.718953	-0.788523	1.07427e-08	-0.839966	2.77852e-10	-0.0514439	0.803946
C1_02920W	orf19.2983	CDC73	0.243841	0.00600886	-0.0644105	0.658336	-0.0743001	0.51475	-0.308252	0.000538748	-0.318142	0.000199551	-0.00988956	0.940375
C2_01090C	orf19.2016	ERG28	-0.230143	0.00454275	-0.0749482	0.545378	-0.0742821	0.466114	0.155195	0.0892795	0.155861	0.0655784	0.000666099	0.995006
C4_03170W	orf19.2673	orf19.2673	0.33966	0.00666125	-0.221941	0.176419	-0.072758	0.673887	-0.561601	5.28893e-06	-0.412418	0.000685077	0.149183	0.322879
C6_01620W	orf19.3425	orf19.3425	0.194346	0.0354625	-0.126351	0.31437	-0.0725178	0.532952	-0.320697	0.000386486	-0.266864	0.00234789	0.0538336	0.650356
C6_02860W	orf19.5561	STE23	-0.308944	0.000496236	-0.178471	0.110382	-0.0712581	0.538488	0.130472	0.231876	0.237686	0.00869821	0.107213	0.314795
C6_01690W	orf19.3417	ACF2	-0.269243	0.000541518	-0.147528	0.143143	-0.071126	0.478943	0.121714	0.199684	0.198117	0.0134346	0.0764024	0.437094
C1_09330W	orf19.4793	orf19.4793	0.425833	6.26495e-05	0.418062	0.000387412	-0.0708827	0.63876	-0.00777059	0.975565	-0.496715	2.09886e-06	-0.488945	6.56313e-06
C6_01040C	orf19.107	orf19.107	0.367279	8.04636e-05	0.280408	0.00922031	-0.0697628	0.580218	-0.0868706	0.507458	-0.437041	1.69888e-06	-0.350171	0.000236168
C2_09500W	orf19.1404	orf19.1404	0.360076	0.00203023	0.439226	0.000520025	-0.0693542	0.674713	0.0791502	0.643102	-0.42943	0.000164361	-0.50858	1.30482e-05
C2_02540W	orf19.1578	orf19.1578	0.372084	1.75734e-06	0.170078	0.0860342	-0.0689585	0.512608	-0.202006	0.0188325	-0.441043	8.72483e-09	-0.239037	0.00412392
C4_03550W	orf19.1324	RAD2	0.213785	0.0187983	0.0479178	0.759481	-0.068578	0.55832	-0.165868	0.0985365	-0.282363	0.00118432	-0.116496	0.266983
C1_04310C	orf19.1066	GIG1	-0.698771	5.42828e-05	-0.0813633	0.79798	-0.068343	0.789737	0.617408	0.000645919	0.630428	0.000280415	0.0130204	0.958051
C1_08810C	orf19.4739	MSS116	0.677273	3.38878e-12	0.37722	0.000676676	-0.0682616	0.626386	-0.300053	0.00488173	-0.745535	1.26756e-14	-0.445481	1.19063e-05
C4_04700W	orf19.3812	SSZ1	0.175818	0.00564458	0.163552	0.0240788	-0.0669019	0.389224	-0.012266	0.919923	-0.24272	6.5922e-05	-0.230454	0.000219351
CR_02680W	orf19.2827	orf19.2827	0.319046	0.00452563	-0.199513	0.186672	-0.066172	0.673887	-0.518558	3.75122e-06	-0.385218	0.000426501	0.133341	0.337472
C3_04150W	snR17A	snR17A	0.320097	0.044976	0.0341844	0.909883	-0.0659304	0.768524	-0.285913	0.0985459	-0.386027	0.0120316	-0.100115	0.622794
C3_02710W	orf19.263.1	orf19.263.1	-0.621908	5.5996e-28	-0.202073	0.00250924	-0.0658421	0.381359	0.419836	5.98048e-13	0.556066	1.56195e-22	0.13623	0.0359882
C2_08530C	orf19.3626	orf19.3626	0.417193	0.000538902	0.221186	0.161962	-0.0658089	0.704213	-0.196007	0.169064	-0.483002	4.40578e-05	-0.286995	0.0286995
C7_03120W	orf19.5143	TIM54	0.162199	0.0307486	-0.112951	0.248353	-0.0641474	0.490706	-0.27515	0.000153483	-0.226346	0.00146018	0.0488035	0.606224
C4_05210W	orf19.6860	PIS1	-0.383032	4.07863e-06	0.0903596	0.475429	-0.0639995	0.567878	0.473392	1.44796e-08	0.319033	0.000146309	-0.154359	0.10441
C4_02790C	orf19.2717	SAS10	0.559901	4.91898e-11	0.366329	0.000143731	-0.0639947	0.599554	-0.193572	0.0490934	-0.623896	1.72165e-13	-0.430323	1.32439e-06
C3_04110C	orf19.5855	MBP1	0.320657	0.000865882	0.00776296	0.967103	-0.0625442	0.636206	-0.312894	0.00163882	-0.383201	4.5602e-05	-0.0703072	0.573767
C1_02970W	orf19.2988	orf19.2988	-0.189745	0.0234336	-0.0489958	0.725991	-0.062158	0.556745	0.140749	0.135554	0.127587	0.146608	-0.0131622	0.91278
C1_01760W	orf19.4549	FGR38	-0.490687	2.79672e-06	-0.110187	0.497395	-0.0621323	0.675162	0.3805	0.000624341	0.428555	4.69095e-05	0.0480552	0.742447
C1_11510C	orf19.1169	orf19.1169	-0.441228	5.82416e-06	-0.505674	2.23517e-06	-0.0616561	0.651018	-0.0644462	0.685726	0.379572	0.000108682	0.444018	1.44036e-05
C1_07490C	orf19.2796	orf19.2796	0.246303	0.00308427	-0.0550461	0.700486	-0.0604486	0.584836	-0.301349	0.000344966	-0.306751	0.000144801	-0.00540249	0.963618
C1_04860W	orf19.757	orf19.757	-0.299939	2.13018e-05	-0.155013	0.0793504	-0.0597031	0.523568	0.144927	0.0765952	0.240236	0.000766523	0.0953095	0.260487
C4_06340W	orf19.2903	AGO1	-0.826187	6.7144e-34	-0.345198	6.13804e-06	-0.0587812	0.532952	0.480989	1.77871e-11	0.767406	2.96664e-29	0.286417	9.12827e-05
C1_00390W	orf19.6070	ENA2	1.05509	3.41249e-09	-0.120277	0.733819	-0.0587542	0.848787	-1.17537	2.94519e-10	-1.11385	4.15072e-10	0.0615227	0.831727
C4_00950C	orf19.4699	orf19.4699	-0.53818	1.07039e-07	-0.314762	0.00997061	-0.0587252	0.683492	0.223418	0.0672998	0.479455	2.50308e-06	0.256037	0.0248659
C1_10090C	orf19.4878	orf19.4878	-0.488237	1.40093e-11	-0.113727	0.268904	-0.0578106	0.562284	0.374509	5.43689e-07	0.430426	2.93946e-09	0.0559168	0.563953
CR_07920W	orf19.606	orf19.606	-0.489662	1.81409e-11	-0.227861	0.00917635	-0.0574098	0.567025	0.261801	0.000986346	0.432252	3.52448e-09	0.170451	0.0391557
C6_04100W	orf19.1212	orf19.1212	-0.413169	3.04003e-06	-0.18219	0.105577	-0.0572281	0.643806	0.230978	0.0179304	0.355941	6.15838e-05	0.124962	0.23376
C1_01570C	orf19.3347	RPB7	0.188645	0.0188759	-0.00882889	0.951422	-0.0567704	0.583233	-0.197474	0.0178942	-0.245416	0.00141497	-0.0479415	0.641668
C2_09380W	orf19.563	RRP15	0.833526	3.52521e-08	0.542013	0.00253643	-0.0563152	0.823913	-0.291513	0.0972724	-0.889842	3.49711e-09	-0.598329	0.000273268
C5_03820C	orf19.1112	BUD7	-0.268026	0.000700749	-0.107348	0.33607	-0.0563026	0.592402	0.160679	0.0734168	0.211724	0.00852361	0.0510451	0.623446
C4_06800W	orf19.3129	RVB1	0.207611	0.002526	0.0605263	0.569882	-0.0556902	0.532838	-0.147085	0.0503482	-0.263302	7.44904e-05	-0.116217	0.129041
C6_02690C	orf19.5541	orf19.5541	0.512595	8.24505e-11	0.278089	0.00246911	-0.0549856	0.6284	-0.234506	0.0069149	-0.567581	4.34945e-13	-0.333074	6.13234e-05
C1_01250W	orf19.3312	orf19.3312	0.391104	3.40041e-05	-0.130142	0.345591	-0.0544692	0.687392	-0.521247	3.36028e-08	-0.445574	1.61386e-06	0.0756732	0.544908
C7_03400C	orf19.1335	orf19.1335	0.528417	3.74759e-13	0.186652	0.0458298	-0.0544027	0.604879	-0.341765	7.293e-06	-0.58282	8.43896e-16	-0.241055	0.00275985
C5_02640W	orf19.4280	orf19.4280	-0.519602	4.13645e-06	-0.225108	0.127323	-0.0540916	0.742104	0.294494	0.0215916	0.465511	4.00903e-05	0.171017	0.206032
C2_02350C	orf19.1555	SAC3	0.278619	0.000163729	0.119537	0.240912	-0.0539054	0.593115	-0.159082	0.0561592	-0.332525	4.42768e-06	-0.173443	0.0327121
C1_06540C	orf19.6259	orf19.6259	0.519175	7.41802e-09	0.451619	4.47178e-06	-0.0534455	0.688108	-0.0675566	0.621791	-0.572621	1.31373e-10	-0.505064	4.50881e-08
C1_07520C	orf19.2792	IST2	-1.24287	1.17987e-35	-0.116123	0.457579	-0.0531595	0.727465	1.12674	3.28535e-29	1.18971	1.01173e-32	0.0629637	0.650907
C3_02430W	orf19.231	APL2	-0.251677	0.000810481	-0.251687	0.00259727	-0.0531415	0.594766	-9.68378e-06	1	0.198536	0.00947172	0.198545	0.0123034
C6_02660C	orf19.5536	orf19.5536	-1.19836	2.56614e-09	-0.267935	0.350642	-0.0531208	0.8617	0.930429	1.49514e-05	1.14524	1.27542e-08	0.214814	0.386699
C1_13850C	orf19.5023	DAL7	-2.14077	NA	-0.515447	NA	-1.82016	NA	1.62532	NA	0	NA	-1.30472	NA
C1_13920W	orf19.5030	DOS2	-0.742747	0.00481677	-0.279894	0.466465	-0.0530774	0.897216	0.462853	0.137298	0.68967	0.00892799	0.226817	0.486204
C2_06640C	orf19.1295	VAS1	0.363363	9.6538e-09	0.090071	0.329323	-0.0527655	0.541753	-0.273292	3.13557e-05	-0.416128	2.92332e-11	-0.142836	0.0441863
C1_13300C	orf19.4956	RPN1	0.179384	0.00729704	0.00786465	0.951422	-0.0524739	0.53824	-0.171519	0.0135169	-0.231858	0.000309364	-0.0603385	0.455062
C4_02420C	orf19.2761	orf19.2761	-0.374926	3.24508e-05	-0.196813	0.0848092	-0.052088	0.682519	0.178113	0.0952589	0.322838	0.000379696	0.144725	0.173336
CR_02860W	orf19.2843	RHO1	-0.934	9.35279e-13	-0.0770614	0.743285	-0.0520564	0.795648	0.856938	1.37384e-10	0.881943	1.6147e-11	0.025005	0.900215
CR_03520C	orf19.4395	orf19.4395	-0.342896	3.72475e-08	-0.160494	0.0361466	-0.0518967	0.53801	0.182403	0.0079268	0.291	3.466e-06	0.108597	0.136857
C5_00940C	orf19.1973	HAP5	0.275778	0.00501168	0.0867386	0.569993	-0.0517924	0.70701	-0.18904	0.0847018	-0.327571	0.00060567	-0.138531	0.221215
C3_02130W	orf19.1633	UTP4	0.374778	1.39757e-06	0.258543	0.00395543	-0.0516062	0.640244	-0.116235	0.228909	-0.426385	2.64796e-08	-0.310149	0.000120149
C4_00810C	orf19.4160	orf19.4160	0.400147	0.00339522	0.276088	0.108273	-0.0509409	0.805891	-0.124059	0.50783	-0.451088	0.000748426	-0.327029	0.0262212
C5_01820W	orf19.3192	STI1	0.200726	0.0224202	0.00954933	0.951422	-0.050886	0.661218	-0.191177	0.0370688	-0.251612	0.00283268	-0.0604353	0.572833
C6_04270W	orf19.1084	CDC39	0.249602	0.000328799	0.0402935	0.739951	-0.0505133	0.587651	-0.209308	0.00405175	-0.300115	9.6816e-06	-0.0908068	0.269256
C2_03550C	orf19.864	orf19.864	0.379825	8.66597e-10	0.176094	0.0223873	-0.0496178	0.570126	-0.203731	0.00243225	-0.429443	2.79983e-12	-0.225712	0.000792392
C1_12340C	orf19.5230	MRPS9	0.408699	4.43424e-08	-0.0359265	0.802773	-0.0492971	0.647215	-0.444626	3.98722e-09	-0.457996	5.80716e-10	-0.0133706	0.907963
C1_08940C	orf19.4752	MSN4	0.492085	0.000138779	0.014072	0.954472	-0.0483683	0.806058	-0.478013	0.000310181	-0.540454	2.13729e-05	-0.0624403	0.726069
CR_02200C	orf19.3752	RAD51	-0.415734	3.90845e-07	0.000884848	0.995466	-0.0479021	0.682558	0.416619	5.344e-07	0.367832	7.51337e-06	-0.048787	0.658981
C6_00150W	orf19.6322	ARD	-0.372763	1.99155e-06	0.10375	0.360731	-0.0475473	0.668895	0.476513	8.59881e-10	0.325215	3.58086e-05	-0.151297	0.0866174
C2_04030C	orf19.819	ACP12	0.331106	0.0197765	-0.169038	0.400958	-0.0473206	0.8223	-0.500144	0.000373804	-0.378426	0.00613645	0.121717	0.488729
C1_11220C	orf19.680	TIM50	0.353444	7.69076e-09	0.058272	0.559622	-0.0454861	0.594187	-0.295172	2.70528e-06	-0.39893	4.34273e-11	-0.103758	0.151256
CR_07270C	orf19.6141	HGT16	0.777929	1.23355e-07	0.176429	0.44628	-0.0452657	0.851258	-0.6015	9.06712e-05	-0.823195	1.77916e-08	-0.221695	0.225184
C3_03180C	orf19.317	PNP1	-0.180008	0.0233004	0.0630386	0.599653	-0.0450338	0.667673	0.243046	0.00188398	0.134974	0.0981589	-0.108072	0.216017
C5_00820W	orf19.585	orf19.585	0.292216	8.53561e-05	0.046614	0.720979	-0.0444017	0.673887	-0.245602	0.00157528	-0.336618	4.03337e-06	-0.0910157	0.313592
C2_08180C	orf19.2167	orf19.2167	0.595723	3.44698e-05	0.345145	0.0530878	-0.0442219	0.848229	-0.250579	0.140031	-0.639945	6.72096e-06	-0.389366	0.0124103
C1_02880C	orf19.2977	MIA40	0.575008	1.75779e-18	-0.141123	0.114192	-0.0426679	0.663697	-0.716131	2.44874e-27	-0.617676	3.34757e-21	0.0984552	0.235918
C1_10340W	orf19.4905	orf19.4905	0.508655	1.09497e-08	-0.42768	3.26679e-05	-0.0420256	0.761289	-0.936335	2.43393e-25	-0.550681	4.61532e-10	0.385654	7.96668e-05
CR_03200C	orf19.2404	orf19.2404	0.233997	0.0093099	0.22428	0.030664	-0.0413322	0.745599	-0.0097166	0.959128	-0.275329	0.00160697	-0.265613	0.00348812
CR_06170W	orf19.3872	orf19.3872	-0.935835	9.66587e-42	-0.371663	1.4057e-06	-0.0412873	0.686182	0.564172	4.13827e-15	0.894548	3.99841e-38	0.330376	6.88701e-06
C5_03070W	orf19.4336	RPS5	0.145382	0.0115439	0.0160692	0.876909	-0.0408844	0.578651	-0.129313	0.0325951	-0.186267	0.000737825	-0.0569536	0.3985
C3_02120W	orf19.1634	orf19.1634	0.199822	0.0326375	-0.219221	0.0402482	-0.0407315	0.752515	-0.419043	2.10379e-06	-0.240553	0.00747736	0.178489	0.0702473
C1_01620C	orf19.3352	orf19.3352	-0.33188	0.0170286	-0.0360776	0.886742	-0.0398528	0.846739	0.295803	0.047508	0.292027	0.0365439	-0.00377515	0.982983
C3_04590W	orf19.5917.3	orf19.5917.3	-2.12725	NA	-2.41599	NA	-2.25036	NA	-0.288733	NA	-0.123109	NA	0.165624	NA
C1_07370C	orf19.4433	CPH1	-1.35287	2.87364e-90	-0.0485183	0.680835	-0.0395848	0.683719	1.30435	8.91291e-82	1.31329	9.78078e-85	0.00893347	0.932149
C4_07090C	orf19.3099	TRP4	0.176599	0.0218882	0.456462	8.83069e-10	-0.0395481	0.704059	0.279863	0.000146723	-0.216147	0.00353983	-0.49601	1.95596e-12
C6_03660C	orf19.5735	CDC50	-0.412844	2.36472e-06	-0.232312	0.0303305	-0.0394981	0.761686	0.180533	0.0832794	0.373346	2.05815e-05	0.192814	0.0512137
C2_10360C	orf19.1742	HEM3	0.402	0.00470405	0.144828	0.499146	-0.0383864	0.861379	-0.257173	0.109236	-0.440387	0.00157413	-0.183214	0.274152
C2_07340W	orf19.1902	NOC4	0.351066	0.000507114	0.450307	2.5248e-05	-0.0376652	0.806058	0.099241	0.466905	-0.388731	8.88716e-05	-0.487972	1.04214e-06
C6_02460C	orf19.5515	orf19.5515	0.297213	0.000284163	-0.0620502	0.656711	-0.0370836	0.761547	-0.359263	1.47641e-05	-0.334297	3.28302e-05	0.0249667	0.833918
C5_01590W	orf19.4153	orf19.4153	-0.822605	6.75661e-18	-0.0354604	0.849154	-0.037	0.802501	0.787144	6.21982e-16	0.785605	2.09967e-16	-0.00153958	0.990682
C3_00830C	orf19.6155	orf19.6155	0.3256	2.76104e-05	-0.0244099	0.873665	-0.0366924	0.753453	-0.35001	1.08297e-05	-0.362293	2.2556e-06	-0.0122826	0.92008
C1_06060C	orf19.2439	ACP1	0.184187	0.00895959	0.0450376	0.705563	-0.0351772	0.723265	-0.13915	0.0736052	-0.219365	0.00132107	-0.0802148	0.338505
C1_11230W	orf19.679	FGR39	0.350073	0.0231034	0.0327035	0.912163	-0.0348937	0.88285	-0.317369	0.0548729	-0.384966	0.0105051	-0.0675972	0.74184
CR_09570W	orf19.6605	orf19.6605	-2.09969	1.59641e-06	-0.151395	NA	-0.0348176	0.958534	1.9483	1.98681e-05	2.06488	2.18176e-06	0.116578	0.831727
C1_10970W	orf19.2319	orf19.2319	0.584603	5.96366e-13	0.327022	0.000427857	-0.034226	0.789646	-0.257581	0.00372602	-0.618829	1.93114e-14	-0.361248	2.44308e-05
C1_05780W	orf19.2473	RSC9	0.158071	0.0191508	0.0222266	0.853959	-0.0340813	0.712829	-0.135844	0.0619537	-0.192152	0.00314088	-0.0563078	0.493525
CR_07650W	orf19.6285	GLC7	0.260858	0.00203023	0.0669174	0.61768	-0.0338339	0.785055	-0.193941	0.0336618	-0.294692	0.000358587	-0.100751	0.311879
C5_01180W	orf19.1954	PUS4	0.296428	1.9939e-05	0.183132	0.0307455	-0.0333678	0.748823	-0.113295	0.17886	-0.329796	1.513e-06	-0.2165	0.00360407
C2_06750C	orf19.3147	orf19.3147	0.344378	0.0159767	0.0419953	0.876909	-0.0332101	0.88199	-0.302383	0.0515237	-0.377588	0.00692873	-0.0752055	0.697032
C4_03270W	orf19.2667	RPF1	0.605413	4.47198e-09	0.523441	3.18754e-06	-0.0332016	0.844102	-0.0819724	0.596822	-0.638615	4.66529e-10	-0.556642	1.38301e-07
CR_01760C	orf19.2573	FRS1	0.289374	3.09816e-06	0.126613	0.109052	-0.0321356	0.724042	-0.162761	0.0166374	-0.32151	1.47204e-07	-0.158749	0.0173574
C7_03180C	orf19.5137.1	HHO1	0.855624	3.13002e-46	0.167235	0.0312893	-0.0321064	0.73568	-0.688389	8.40289e-30	-0.88773	1.60278e-49	-0.199341	0.00338419
C2_00140W	orf19.2119	NDT80	0.225654	0.0094807	0.25026	0.00940911	-0.031696	0.802856	0.0246056	0.870415	-0.25735	0.00234621	-0.281956	0.00106767
C2_08800C	orf19.3591	APE3	0.244108	0.000439669	-0.0506773	0.66307	-0.0314134	0.757583	-0.294786	2.26792e-05	-0.275522	5.17983e-05	0.0192639	0.844577
C1_04960C	orf19.50	orf19.50	0.324999	0.0223226	-0.0455959	0.858672	-0.0310616	0.88763	-0.370595	0.0108473	-0.35606	0.0102808	0.0145343	0.943537
C6_02260C	orf19.3467	SEC27	-0.20096	0.000701423	-0.249291	7.74829e-05	-0.0309502	0.712415	-0.0483313	0.572797	0.170009	0.00444495	0.218341	0.000259981
C1_13030C	orf19.4931	orf19.4931	0.154483	0.0463252	0.0651297	0.565158	-0.0307021	0.772215	-0.0893529	0.332371	-0.185185	0.0127793	-0.0958318	0.258905
CR_01590C	orf19.2546	TRP2	0.240124	0.000117589	0.308465	2.49703e-06	-0.0304309	0.73804	0.0683411	0.410879	-0.270555	9.99943e-06	-0.338896	3.56101e-08
C5_02650C	orf19.4282	IFH1	0.306125	1.36783e-05	-0.0707147	0.521233	-0.0301414	0.775784	-0.376839	8.55497e-08	-0.336266	1.27824e-06	0.0405733	0.672748
C2_06030W	orf19.4117	orf19.4117	-0.259972	0.00428569	-0.166933	0.153389	-0.0297507	0.827373	0.0930389	0.450751	0.230221	0.0118814	0.137182	0.190179
C6_03640W	orf19.5732	NOG2	0.553185	2.02404e-11	0.545463	5.80027e-10	-0.0295506	0.824258	-0.00772209	0.96827	-0.582735	1.25949e-12	-0.575013	5.40034e-12
C5_01640W	orf19.6295	MAS2	0.263735	0.000446505	-0.0761153	0.515757	-0.0274355	0.811033	-0.33985	6.84753e-06	-0.29117	8.01385e-05	0.0486798	0.630281
C1_05670W	orf19.2484	orf19.2484	-0.208875	0.0163454	-0.178198	0.0895803	-0.0271211	0.832978	0.0306776	0.832996	0.181754	0.0377653	0.151076	0.112345
CR_04450C	orf19.536	orf19.536	0.260014	0.000932718	-0.00801891	0.957158	-0.0267712	0.823913	-0.268033	0.000868478	-0.286785	0.000199554	-0.0187523	0.870294
CR_03310C	orf19.2393	orf19.2393	0.480141	2.89068e-08	0.0940069	0.502381	-0.0262049	0.853914	-0.386134	1.94131e-05	-0.506346	3.90464e-09	-0.120212	0.273105
C1_10580C	orf19.1830	orf19.1830	0.719732	1.46084e-05	0.352269	0.109014	-0.0261117	0.932506	-0.367463	0.048919	-0.745844	5.9908e-06	-0.37838	0.0473706
C6_03730C	orf19.5747	orf19.5747	0.293597	9.49617e-05	0.0325848	0.8153	-0.0258706	0.824258	-0.261012	0.000822188	-0.319467	1.63128e-05	-0.0584554	0.549957
C2_02030W	orf19.1517	ARO3	0.345068	4.42991e-05	0.462666	2.25104e-07	-0.0255515	0.849509	0.117597	0.260612	-0.37062	8.9477e-06	-0.488217	6.89514e-09
C7_01470C	orf19.6582	PRE10	-2.11916	NA	-2.39425	NA	-1.97474	NA	-0.275085	NA	0.144426	NA	0.419511	NA
CR_02910W	orf19.2848	ATG13	-0.36723	2.00229e-05	0.0382218	0.81136	-0.0252812	0.850441	0.405452	3.58975e-06	0.341949	6.99331e-05	-0.063503	0.574321
CR_06140W	orf19.3869	orf19.3869	1.82089	6.03846e-63	-0.559687	7.46133e-05	-0.0252424	0.902006	-2.38058	1.81111e-92	-1.84613	2.99543e-64	0.534445	5.90767e-05
C1_06630W	orf19.6247	orf19.6247	0.297303	0.000429317	-0.135961	0.241589	-0.0250835	0.849271	-0.433264	2.33992e-07	-0.322386	0.000104167	0.110878	0.275028
C7_03420C	orf19.1333	SNG3	-0.5698	2.54775e-10	0.323167	0.00144473	-0.025027	0.862306	0.892967	4.59493e-24	0.544773	1.4465e-09	-0.348194	0.000187346
CR_03660C	orf19.4365	orf19.4365	0.435008	0.000910386	0.473441	0.00118951	-0.0248684	0.912707	0.0384332	0.867956	-0.459876	0.000386675	-0.49831	0.000221341
C5_01110W	orf19.1959	orf19.1959	0.191146	0.045696	0.112326	0.385091	-0.0246707	0.860011	-0.0788194	0.53298	-0.215816	0.0196309	-0.136997	0.187116
C2_04200W	orf19.801	TBF1	0.549348	1.60073e-14	0.199307	0.0266631	-0.0243126	0.837743	-0.350041	2.80032e-06	-0.573661	8.6005e-16	-0.223619	0.00478535
C1_09310C	orf19.4791	orf19.4791	-0.491267	0.000585578	-0.194762	0.337126	-0.0242536	0.918087	0.296505	0.0710512	0.467013	0.00103518	0.170508	0.322081
C1_13060C	orf19.4932	orf19.4932	0.426724	2.20473e-08	0.071496	0.564137	-0.0230557	0.850359	-0.355228	5.89449e-06	-0.44978	2.72477e-09	-0.0945517	0.317374
C3_05680W	orf19.7347	orf19.7347	-0.377106	0.0225684	-0.0671621	0.818223	-0.0227144	0.933098	0.309944	0.0924545	0.354392	0.0313727	0.0444477	0.843562
C2_07000W	orf19.2256	orf19.2256	0.334663	1.54126e-05	0.17428	0.0739728	-0.022353	0.856292	-0.160383	0.0714761	-0.357016	3.08194e-06	-0.196633	0.0202767
C1_11080W	orf19.2308	orf19.2308	0.271482	0.0193674	0.589198	2.92628e-07	-0.0219378	0.906181	0.317717	0.00577824	-0.293419	0.00970974	-0.611136	1.69904e-08
C2_02240C	orf19.1542	HEX3	-0.181687	0.00948736	0.0669569	0.520401	-0.0218705	0.834389	0.248644	0.000343523	0.159817	0.0231199	-0.0888274	0.269741
C2_09600C	orf19.1394	orf19.1394	0.339092	2.4425e-05	0.235116	0.0133522	-0.0213636	0.866808	-0.103976	0.311807	-0.360456	5.63469e-06	-0.25648	0.00249376
C1_03740W	orf19.1035	WAR1	0.265311	0.0108374	0.0431058	0.820675	-0.0208414	0.90152	-0.222205	0.0494137	-0.286152	0.00501654	-0.0639472	0.641069
C6_01000C	orf19.102	AEP1	0.310087	0.000817542	0.0143073	0.940872	-0.020748	0.89085	-0.295779	0.00219725	-0.330835	0.000291333	-0.0350553	0.789888
C6_01890C	orf19.3393	orf19.3393	0.643323	9.37084e-13	0.588404	1.70094e-09	-0.0204585	0.897216	-0.0549189	0.70383	-0.663781	1.51567e-13	-0.608863	5.40885e-11
C5_01210W	orf19.1949	VPS1	-0.388735	2.48413e-07	0.0553687	0.666223	-0.0201639	0.865512	0.444103	3.57917e-09	0.368571	9.38129e-07	-0.0755326	0.428378
CR_07510W	orf19.2621	orf19.2621	0.972412	1.41438e-27	0.723402	1.81182e-13	-0.020105	0.903678	-0.249011	0.0120775	-0.992517	1.46047e-28	-0.743507	3.32844e-15
C3_05190C	orf19.5995	MCA1	-0.94459	0.0160159	-0.646595	0.19819	-0.0198405	0.973793	0.297996	0.606105	0.92475	0.017223	0.626754	0.146358
C3_07150C	orf19.6785	RPS12	-0.297121	0.0425586	-0.146437	0.475429	-0.0196875	0.933807	0.150684	0.411924	0.277434	0.0562664	0.126749	0.460345
C1_02320C	orf19.3689	orf19.3689	-0.358364	0.00326696	-0.246491	0.0990138	-0.0193528	0.923745	0.111873	0.50783	0.339011	0.00515254	0.227138	0.0875315
C2_04940C	orf19.3526	ITR1	-0.266528	0.0181452	-0.0865181	0.61768	-0.0188845	0.916447	0.18001	0.158941	0.247644	0.0273881	0.0676336	0.633436
C6_02840C	orf19.5558	RBF1	0.25519	0.000166763	0.0381606	0.754882	-0.0183903	0.864258	-0.21703	0.0024007	-0.273581	4.32087e-05	-0.0565509	0.523199
C2_03420C	orf19.879	orf19.879	-0.193026	0.0413919	0.140282	0.24267	-0.0175169	0.90483	0.333308	0.00022175	0.175509	0.0629326	-0.157799	0.11295
C1_10180C	orf19.4887	ECM21	-0.349	0.00574953	-0.104484	0.598801	-0.0174419	0.93511	0.244516	0.0872653	0.331558	0.00843009	0.0870422	0.591554
C2_00330C	orf19.2099	HIR1	0.260682	0.0185741	-0.00324775	0.984927	-0.0171897	0.9252	-0.26393	0.0226629	-0.277872	0.0103689	-0.013942	0.931709
C1_10360C	orf19.4907	orf19.4907	-0.287176	0.0156669	0.299703	0.0237808	-0.016609	0.933098	0.586879	1.34544e-07	0.270567	0.022023	-0.316312	0.00728799
C4_01190W	orf19.4670	CAS5	0.879543	1.13832e-20	-0.0214124	0.916443	-0.0165938	0.925773	-0.900955	1.04747e-20	-0.896137	2.13926e-21	0.00481854	0.975917
C1_03360W	orf19.3035	orf19.3035	0.327455	1.90592e-05	-0.0150726	0.923145	-0.0159838	0.902006	-0.342528	1.28164e-05	-0.343439	5.831e-06	-0.000911206	0.992928
CR_02510W	orf19.173	orf19.173	1.20738	4.05291e-49	0.0269913	0.877042	-0.0155483	0.920722	-1.18039	3.85952e-45	-1.22293	4.06484e-50	-0.0425397	0.737904
C1_10120C	orf19.4882	orf19.4882	-0.210113	0.00367532	-0.0726373	0.499313	-0.0155144	0.891912	0.137476	0.09131	0.194599	0.00699494	0.057123	0.526751
C7_02790C	orf19.5182	POL3	0.388128	1.3377e-06	-0.00689324	0.966228	-0.0155082	0.911376	-0.395021	1.51471e-06	-0.403636	4.03688e-07	-0.00861495	0.944717
C5_04620C	orf19.3946	orf19.3946	0.309032	0.0108588	0.00868274	0.970133	-0.0153948	0.940655	-0.300349	0.0192169	-0.324426	0.00650561	-0.0240775	0.893411
C3_01880W	orf19.1659	ALG8	-0.467757	3.07301e-07	-0.352747	0.000701111	-0.0151582	0.923745	0.11501	0.357675	0.452599	6.80547e-07	0.337589	0.000521096
C6_02360W	orf19.3478	NIP7	0.677411	9.92522e-11	0.479811	5.62308e-05	-0.0150461	0.940004	-0.1976	0.113673	-0.692457	3.28166e-11	-0.494857	9.25662e-06
CR_05790C	orf19.6632	ACO2	0.900904	4.98098e-13	0.919306	5.63928e-12	-0.0148705	0.951375	0.0184019	0.944596	-0.915774	1.8752e-13	-0.934176	2.36421e-13
C1_07860W	orf19.5057	orf19.5057	0.306417	0.0179666	-0.214215	0.223554	-0.0145431	0.947768	-0.520632	5.55157e-05	-0.32096	0.0116533	0.199672	0.186944
CR_02420W	orf19.3724	orf19.3724	0.547397	3.30107e-13	0.307272	0.000458908	-0.0141675	0.917299	-0.240125	0.00356478	-0.561564	7.09958e-14	-0.321439	7.68587e-05
CR_02270C	orf19.3742	orf19.3742	-0.544774	0.000278623	-0.122778	0.613283	-0.0134598	0.958949	0.421996	0.00975332	0.531314	0.000362618	0.109318	0.574993
C1_04710C	orf19.773	orf19.773	0.502	3.46705e-05	0.387791	0.00625027	-0.0134342	0.952238	-0.114209	0.502736	-0.515434	1.79357e-05	-0.401225	0.0018146
C1_02850W	orf19.2973	orf19.2973	0.212881	0.0393939	0.150889	0.259613	-0.013183	0.939152	-0.0619921	0.677294	-0.226064	0.0248529	-0.164072	0.140498
C3_01040C	orf19.2508	PRM9	0.817845	0.0250908	-0.436676	0.434982	-0.0130685	0.983273	-1.25452	0.000896421	-0.830914	0.0208803	0.423607	0.359822
C1_11760C	orf19.1140	orf19.1140	0.304685	0.000240436	-0.181401	0.0831047	-0.0128208	0.929488	-0.486086	2.90322e-09	-0.317505	0.000106853	0.16858	0.0712777
C2_02120W	orf19.1528	orf19.1528	0.278251	0.00124647	0.125919	0.298287	-0.0126643	0.933098	-0.152332	0.127421	-0.290916	0.000623237	-0.138584	0.164442
C4_01500W	orf19.4634	orf19.4634	0.533736	7.6973e-08	0.502915	4.05196e-06	-0.0122902	0.947026	-0.0308205	0.866009	-0.546026	3.23941e-08	-0.515206	5.58233e-07
C1_08370W	orf19.5118	SDS24	-0.765762	6.65801e-27	-0.0564029	0.650162	-0.0121454	0.924513	0.709359	7.56516e-23	0.753617	4.32771e-26	0.0442576	0.656355
C1_14550C	orf19.7272	orf19.7272	-0.254409	0.029798	-0.086994	0.632651	-0.0118627	0.951922	0.167415	0.218184	0.242547	0.0367065	0.0751313	0.607868
C6_00350W	orf19.1196	PKH3	-0.567087	2.22456e-12	-0.0453117	0.760341	-0.0117076	0.936205	0.521775	2.48865e-10	0.55538	5.67725e-12	0.0336041	0.772766
C3_04490W	orf19.5903	RAX1	-1.00958	0.000826217	-0.273643	0.554119	-0.0114161	0.981101	0.735932	0.0291009	0.998159	0.000859492	0.262227	0.47943
C6_04360C	orf19.1095	GLE2	0.168867	0.0496962	0.0833621	0.493581	-0.011266	0.936205	-0.0855052	0.424224	-0.180133	0.0313249	-0.0946281	0.327711
C1_08800W	orf19.4738	orf19.4738	-0.485817	5.63037e-07	-0.0611439	0.722665	-0.0110939	0.948892	0.424673	2.55413e-05	0.474723	9.17943e-07	0.05005	0.708932
C2_04100W	orf19.811	orf19.811	-0.449369	3.04597e-05	-0.0791592	0.666149	-0.0103841	0.95688	0.37021	0.00126802	0.438985	4.20759e-05	0.0687751	0.635115
C2_01420C	orf19.1447	orf19.1447	0.548353	0.0332214	0.0433337	0.932949	-0.0102277	0.981101	-0.50502	0.0696039	-0.558581	0.027265	-0.0535614	0.886638
C6_00690W	orf19.3660	orf19.3660	0.258826	0.00853854	0.02004	0.916543	-0.0102188	0.952671	-0.238786	0.0232374	-0.269045	0.0054694	-0.0302588	0.828574
C1_06910C	orf19.6220	orf19.6220	0.251914	0.00624757	0.0704516	0.635171	-0.00895828	0.955452	-0.181463	0.0757047	-0.260873	0.00402873	-0.0794099	0.488353
C2_02100W	orf19.1526	SNF2	0.33355	2.40736e-07	0.0416053	0.720858	-0.00861443	0.940655	-0.291945	1.15949e-05	-0.342165	9.43903e-08	-0.0502197	0.562035
C1_09910C	orf19.4857	orf19.4857	0.655803	1.32039e-16	-0.298077	0.00268989	-0.00808198	0.958124	-0.95388	1.51201e-31	-0.663885	5.05596e-17	0.289995	0.00157513
C1_08710W	orf19.4730	orf19.4730	0.357005	0.00268499	0.0579839	0.794649	-0.00801106	0.969827	-0.299021	0.0197721	-0.365016	0.00187807	-0.0659949	0.685452
C6_03110C	orf19.5596	orf19.5596	0.402495	0.00259639	0.184143	0.337957	-0.0073228	0.973793	-0.218352	0.162635	-0.409818	0.00190078	-0.191466	0.226433
C5_00680W	orf19.920	RMT2	0.597386	8.35803e-08	0.25886	0.077291	-0.00707617	0.973458	-0.338527	0.00520597	-0.604462	5.06658e-08	-0.265936	0.0391545
C1_05370C	orf19.428	orf19.428	-0.350773	0.000227419	-0.0621873	0.706394	-0.00703327	0.966872	0.288586	0.00456643	0.34374	0.00027712	0.0551541	0.665718
C2_00730C	orf19.2051	orf19.2051	0.263281	0.0122968	0.0817513	0.621471	-0.00685786	0.969827	-0.18153	0.124367	-0.270139	0.00904062	-0.0886092	0.493179
C1_10830W	orf19.2334	BIG1	-0.277497	0.00309237	0.031914	0.852053	-0.00685767	0.966505	0.309411	0.00122201	0.270639	0.00363241	-0.0387717	0.759309
C1_05090W	orf19.4062	TRY2	0.209436	0.0406338	0.281543	0.0126179	-0.0065027	0.969827	0.0721073	0.609416	-0.215939	0.0311266	-0.288046	0.00460144
C1_01590C	orf19.3349	orf19.3349	0.149148	0.0208399	-0.0184686	0.874553	-0.00606192	0.955603	-0.167616	0.0106837	-0.15521	0.014235	0.0124066	0.892285
CR_04240C	orf19.512	orf19.512	0.508607	2.59467e-12	0.301241	0.000257325	-0.00593195	0.965356	-0.207366	0.0102865	-0.514539	1.21971e-12	-0.307173	6.09599e-05
C4_00520W	orf19.4190	PAM18	0.381706	3.77763e-06	0.252358	0.0103599	-0.00536798	0.971337	-0.129348	0.201316	-0.387074	2.32911e-06	-0.257726	0.00373154
C2_03800C	orf19.841	orf19.841	-0.503478	2.08931e-11	-0.154899	0.116002	-0.0052675	0.969782	0.348579	9.86032e-06	0.49821	2.93349e-11	0.149632	0.0848229
C3_04880W	orf19.5956	PIN3	-1.04791	0.000318042	0.072167	0.89258	-0.00467877	0.991889	1.12007	0.000162471	1.04323	0.000299338	-0.0768458	0.846453
C6_03620C	orf19.5730	orf19.5730	0.382759	4.91335e-06	-0.201783	0.0633578	-0.00455673	0.974675	-0.584542	4.18246e-12	-0.387316	3.2097e-06	0.197227	0.0412402
C3_01170W	orf19.3154	orf19.3154	0.236056	0.0176929	-0.185464	0.137384	-0.00438216	0.979023	-0.421519	1.30072e-05	-0.240438	0.0141282	0.181082	0.0967299
C2_05840W	orf19.5207	orf19.5207	0.354984	0.0268625	0.328454	0.086564	-0.00404998	0.988189	-0.0265301	0.931103	-0.359034	0.022968	-0.332504	0.0487962
C1_09090C	orf19.4766	ARG81	0.435767	0.000543703	0.0742457	0.747066	-0.0034001	0.988189	-0.361521	0.00748299	-0.439167	0.000433929	-0.0776458	0.656239
C4_01660W	orf19.4627	orf19.4627	0.261899	0.000114935	-0.0444206	0.71139	-0.00295684	0.980526	-0.30632	8.23656e-06	-0.264856	8.21512e-05	0.0414637	0.651476
C1_05230W	orf19.443	orf19.443	0.468344	8.22199e-05	0.276732	0.0667719	-0.00208258	0.991889	-0.191612	0.180212	-0.470426	6.63957e-05	-0.278815	0.0369601
C2_01070W	orf19.2017	orf19.2017	0.279326	1.04593e-05	0.338429	5.45188e-07	-0.00202674	0.9857	0.0591029	0.51126	-0.281353	7.62252e-06	-0.340456	9.04843e-08
C2_04350C	orf19.4519	SUV3	0.559607	2.70449e-09	0.208215	0.0990279	-0.0018316	0.99122	-0.351392	0.000454544	-0.561438	2.05501e-09	-0.210046	0.0579406
C5_02550C	orf19.4268	UTP13	0.455011	1.2925e-08	0.365022	3.62097e-05	-0.00157049	0.991036	-0.0899889	0.411906	-0.456582	9.70733e-09	-0.366593	9.94814e-06
C3_01030W	orf19.2507	ARP9	0.26888	0.000823378	-0.131502	0.235394	-0.0011508	0.993225	-0.400382	5.70724e-07	-0.270031	0.00069308	0.130351	0.164513
C5_04410C	orf19.3928	orf19.3928	-0.302624	0.000812509	-0.181101	0.114893	-0.000477701	0.998304	0.121522	0.291088	0.302146	0.000738243	0.180623	0.0725817
C2_01180W	orf19.2006.1	COX17	0.343122	0.00077304	-0.248173	0.0544489	-0.000473309	0.99849	-0.591295	6.69832e-09	-0.343595	0.000676371	0.2477	0.030764
C6_02340W	orf19.3476	HRR25	-0.72186	5.33582e-25	-0.018847	0.89258	-0.00017587	0.998969	0.703013	3.21948e-23	0.721684	5.43843e-25	0.0186712	0.859572
C1_01030W	orf19.3291	HMT1	0.271246	0.0207578	0.230378	0.0986535	0.000280415	0.998969	-0.0408679	0.832534	-0.270965	0.0191064	-0.230097	0.060262
C2_02520W	orf19.1576	orf19.1576	0.30627	0.0363068	0.155651	0.449347	0.000345737	0.998969	-0.150619	0.41067	-0.305924	0.0333949	-0.155305	0.356648
C2_08570W	orf19.3622	ANP1	0.372866	0.011387	0.0338564	0.905212	0.000434974	0.998969	-0.339009	0.0316691	-0.372431	0.0104998	-0.0334215	0.876557
C2_06070W	orf19.4114	FAA2-1	-0.495724	8.28326e-06	-0.426995	0.000607801	0.000459661	0.998567	0.0687292	0.701527	0.496184	6.88357e-06	0.427455	0.000218113
C1_12400C	orf19.5225	orf19.5225	-0.278064	0.00101765	-0.195176	0.0589199	0.00124622	0.992809	0.0828876	0.482568	0.27931	0.000848999	0.196423	0.0320028
C2_02720W	orf19.5834	orf19.5834	0.318833	3.38669e-05	0.156168	0.12141	0.00185184	0.98891	-0.162664	0.0649148	-0.316981	3.30035e-05	-0.154317	0.080493
CR_08370W	orf19.6404	GSH2	0.268492	0.00666125	0.224204	0.0582456	0.00203827	0.990198	-0.0442886	0.780088	-0.266454	0.00648087	-0.222166	0.0346927
C3_03330C	orf19.332	orf19.332	0.263549	0.00339522	0.0771721	0.590348	0.00219089	0.98867	-0.186377	0.0619537	-0.261359	0.00334644	-0.0749812	0.511027
C1_10880W	orf19.2330	orf19.2330	0.45836	1.13971e-10	0.380329	9.22977e-07	0.00242404	0.985164	-0.0780313	0.429401	-0.455936	1.23291e-10	-0.377905	2.36611e-07
C2_03890W	orf19.836	orf19.836	0.322614	0.00980884	-0.021695	0.931852	0.00281401	0.989111	-0.344309	0.00841624	-0.3198	0.00965249	0.024509	0.895084
C2_01310W	orf19.1994	orf19.1994	-0.290587	0.00431339	-0.00340192	0.983584	0.0031318	0.985513	0.287185	0.00674113	0.293719	0.00347577	0.00653372	0.963203
C6_03440W	orf19.5704	orf19.5704	0.387178	0.000556395	0.558362	1.75078e-06	0.00334222	0.986349	0.171184	0.196302	-0.383836	0.000553189	-0.55502	5.05792e-07
C2_09560C	orf19.1400	orf19.1400	-0.320984	3.1075e-05	-0.199567	0.0329665	0.00365904	0.977958	0.121418	0.204107	0.324643	2.1221e-05	0.203226	0.0149109
C5_01840C	orf19.3188	TAC1	0.210092	0.00694748	-0.0181046	0.903307	0.00422642	0.973793	-0.228197	0.00450801	-0.205866	0.00754601	0.0223311	0.838052
C5_01530C	orf19.4148	orf19.4148	-0.194032	0.0250927	-0.0989625	0.414129	0.00455972	0.973793	0.09507	0.384198	0.198592	0.0196586	0.103522	0.296169
CR_03550W	orf19.4399	NCS2	0.404221	4.46879e-07	0.67402	1.10409e-16	0.00507388	0.972699	0.269799	0.00125315	-0.399147	5.4499e-07	-0.668946	1.95919e-17
C2_07450C	orf19.1886	RCL1	0.601157	2.97402e-21	0.445304	1.33629e-10	0.00517802	0.966298	-0.155853	0.0341177	-0.595979	6.33812e-21	-0.440126	2.82634e-11
C6_03300C	orf19.5618	orf19.5618	-0.562032	4.06988e-09	-0.149234	0.27368	0.00523241	0.973793	0.412798	4.66981e-05	0.567264	2.39726e-09	0.154466	0.175025
CR_03010C	orf19.2863.1	ERV1	0.330721	0.000701145	0.00262633	0.986044	0.00529571	0.973793	-0.328094	0.00120473	-0.325425	0.000766226	0.00266937	0.983801
C2_00830C	orf19.2041	RSC4	0.337095	1.13699e-06	0.046286	0.706042	0.00561302	0.965144	-0.290809	4.73696e-05	-0.331482	1.50859e-06	-0.0406729	0.668609
C6_03670C	orf19.5735.3	orf19.5735.3	0.882609	0.04364	-0.373852	NA	0.00574652	0.993657	-1.25646	0.00620634	-0.876862	0.041481	0.379598	0.509547
C1_02620C	orf19.2951	HOM6	0.222978	0.00183258	0.0476681	0.695034	0.00584302	0.963584	-0.17531	0.0223611	-0.217135	0.0021959	-0.041825	0.656309
CR_01370C	orf19.2520	orf19.2520	0.244991	0.002795	0.0461956	0.743083	0.00593761	0.967281	-0.198796	0.0229901	-0.239054	0.00324614	-0.040258	0.711379
C4_06400C	orf19.2895	VMA8	-0.14102	0.0292779	-0.206276	0.00279667	0.0061082	0.954967	-0.0652561	0.432502	0.147128	0.0202408	0.212384	0.000791265
C3_01850W	orf19.1662	orf19.1662	0.295741	6.14454e-05	-0.0222652	0.876893	0.0062951	0.963316	-0.318006	2.34254e-05	-0.289446	7.79758e-05	0.0285603	0.786637
C1_01860W	orf19.4537	orf19.4537	0.266081	4.1489e-05	0.0787593	0.410818	0.00665803	0.954954	-0.187322	0.00706854	-0.259423	5.71838e-05	-0.0721013	0.369081
C6_03000C	orf19.5579	orf19.5579	-0.772864	2.12018e-12	-0.204269	0.172308	0.00709076	0.971298	0.568595	1.14016e-06	0.779955	1.13357e-12	0.21136	0.0983226
C1_01380C	orf19.3327	TRM2	0.731307	1.30047e-09	0.494707	0.000310228	0.0073558	0.973622	-0.2366	0.0955398	-0.723951	1.61291e-09	-0.487351	0.000136587
C1_06420C	orf19.6268	orf19.6268	-0.295158	0.000744666	-0.170006	0.126628	0.0077536	0.959777	0.125153	0.24885	0.302912	0.000454361	0.17776	0.0651456
C1_13420C	orf19.4969	KEM1	0.275014	1.55071e-05	-0.0696093	0.474154	0.00805282	0.943348	-0.344624	5.77824e-08	-0.266961	2.44225e-05	0.0776621	0.318937
C1_05700W	orf19.2480.1	AUT7	-0.27166	0.010746	-0.231056	0.0680742	0.00811265	0.9649	0.0406049	0.817298	0.279773	0.00753612	0.239168	0.0321041
C3_00670C	orf19.5389	FKH2	0.291279	0.00307875	0.0617761	0.719871	0.00813787	0.963584	-0.229503	0.0318344	-0.283141	0.00372524	-0.0536383	0.686202
C1_12440W	orf19.5220	orf19.5220	0.634069	0.00233486	0.60112	0.0131625	0.0103683	0.977219	-0.0329491	0.935556	-0.623701	0.00250154	-0.590752	0.00699956
CR_00860C	orf19.3268	TMA19	-0.240122	0.001352	0.102908	0.323585	0.0111709	0.930735	0.34303	3.40482e-06	0.251292	0.000660507	-0.0917372	0.298403
C6_03290W	orf19.5617	orf19.5617	0.250838	0.00554537	-0.140358	0.259362	0.0114961	0.940655	-0.391195	1.32416e-05	-0.239342	0.0077339	0.151854	0.142045
C1_12530C	orf19.3763	orf19.3763	-0.392607	0.000713659	-0.324582	0.0184902	0.0120256	0.952601	0.0680245	0.716882	0.404632	0.000408504	0.336608	0.00631007
C4_04820C	orf19.3797	orf19.3797	0.401978	3.98468e-07	-0.0075379	0.962771	0.0131473	0.925724	-0.409515	4.01278e-07	-0.38883	8.48745e-07	0.0206852	0.862147
CR_06440C	orf19.723	BCR1	-0.976805	1.74479e-43	-0.0316694	0.815983	0.0133388	0.913908	0.945136	9.60408e-40	0.990144	1.3122e-44	0.0450082	0.645832
CR_02980C	orf19.2859	SRP40	0.245961	0.0128673	0.544712	2.42026e-08	0.0135332	0.935701	0.298751	0.002246	-0.232428	0.017985	-0.531178	9.36403e-09
C7_01310C	orf19.6911	orf19.6911	-2.08369	NA	1.45623	NA	-1.76308	NA	3.53991	0.471793	0	1	-3.21931	NA
C3_05410W	orf19.6979	orf19.6979	-0.59709	0.0261337	-0.740326	0.0137239	0.0137183	0.973793	-0.143236	0.731612	0.610808	0.0204882	0.754044	0.00519846
C3_02850C	orf19.276	orf19.276	0.554446	0.00591692	0.183173	0.565942	0.0145283	0.968451	-0.371274	0.100723	-0.539918	0.00686044	-0.168644	0.510788
C2_05550W	orf19.6867	ECS2	-0.67277	0.017515	-0.440055	0.239589	0.0147987	0.973793	0.232715	0.569583	0.687569	0.0135815	0.454854	0.147143
C6_02220W	orf19.3462	SAR1	-0.539424	0.000310407	-0.361582	0.0470014	0.01516	0.953646	0.177842	0.374474	0.554584	0.000173801	0.376742	0.0191542
C1_03030W	orf19.2994.1	RPS16A	0.245479	0.000904094	0.0783216	0.471603	0.0154848	0.897216	-0.167157	0.0380961	-0.229994	0.00179617	-0.0628367	0.49295
CR_01600C	orf19.2547	orf19.2547	0.552602	3.69855e-07	0.124024	0.469754	0.0155181	0.938551	-0.428578	0.00017003	-0.537084	6.95201e-07	-0.108506	0.449158
C1_07090C	orf19.6195	orf19.6195	0.196178	0.0473912	0.0812405	0.583306	0.0156123	0.921458	-0.114938	0.332431	-0.180566	0.0663628	-0.0656282	0.591163
C4_06720W	orf19.3138	NOP1	0.608258	2.05441e-14	0.443822	3.44189e-07	0.0156539	0.91144	-0.164436	0.0822492	-0.592604	8.64378e-14	-0.428168	2.0302e-07
C1_09250W	orf19.4784	CRP1	1.10832	0.0129361	0.216818	0.775389	0.0157507	0.983143	-0.891507	0.0626397	-1.09257	0.0132046	-0.201067	0.727441
C2_02860W	orf19.5818	SUR2	-0.843087	2.36464e-14	0.297278	0.0283353	0.016265	0.936063	1.14037	1.4778e-25	0.859352	6.04672e-15	-0.281013	0.0214679
CR_01690C	orf19.2560	CDC60	0.445678	6.68736e-15	0.338641	4.50103e-08	0.0163344	0.861449	-0.107037	0.124604	-0.429343	5.87391e-14	-0.322307	4.02092e-08
C4_02180C	orf19.4573	ZCF26	-1.39507	1.72558e-07	-0.268902	0.49604	0.0164652	0.970176	1.12617	8.12701e-05	1.41154	1.01017e-07	0.285368	0.368574
CR_07770C	orf19.3705	PTC6	-0.292835	0.000247761	-0.225878	0.0174121	0.0168379	0.897216	0.0669567	0.571925	0.309673	8.40557e-05	0.242716	0.00415016
CR_04490C	orf19.540	orf19.540	-0.319148	0.00102308	-0.165675	0.201214	0.0172426	0.914049	0.153473	0.193511	0.33639	0.000436675	0.182917	0.0926921
C5_02670W	orf19.4284	BUR2	0.246812	0.00528306	-0.116325	0.361408	0.0184287	0.897272	-0.363137	4.02062e-05	-0.228384	0.00965965	0.134753	0.190893
C2_06320W	orf19.5495	orf19.5495	-1.00132	2.2216e-05	-0.308004	0.360731	0.0185423	0.963996	0.693316	0.00828851	1.01986	1.27616e-05	0.326546	0.236474
CR_07420W	orf19.6126	KGD2	0.669224	5.29329e-14	0.655539	2.89177e-12	0.0192532	0.90022	-0.0136846	0.943375	-0.64997	2.51645e-13	-0.636286	1.37077e-12
CR_03060W	orf19.2422	ARC1	0.185361	0.00817187	0.17032	0.0332562	0.0196353	0.851045	-0.0150415	0.907014	-0.165726	0.0181561	-0.150684	0.0386318
C2_01850W	orf19.1494	RAD23	0.179605	0.00723304	0.0260511	0.826758	0.0198136	0.844102	-0.153554	0.0303746	-0.159791	0.0170864	-0.00623745	0.947769
C1_11560C	orf19.1163	orf19.1163	0.366733	0.0433281	0.200398	0.439431	0.0198145	0.948523	-0.166335	0.478603	-0.346918	0.0534007	-0.180583	0.404268
C4_05370W	orf19.1795	PUF3	0.32976	0.000825329	0.0552138	0.753847	0.0199398	0.903041	-0.274546	0.00888334	-0.30982	0.00160026	-0.035274	0.802563
CR_03910C	orf19.470	TAF12L	0.310087	0.00102703	0.130869	0.339164	0.0201093	0.89746	-0.179218	0.0981766	-0.289978	0.002054	-0.11076	0.342592
C6_04070C	orf19.1215	orf19.1215	0.540264	0.0243795	0.131905	0.756897	0.0203472	0.96231	-0.408359	0.130228	-0.519917	0.0286184	-0.111558	0.734409
CR_04500C	orf19.541	orf19.541	0.436666	0.00215323	0.578	0.000138809	0.020373	0.935623	0.141334	0.448143	-0.416293	0.00323881	-0.557627	8.66469e-05
C2_01660C	orf19.1477	orf19.1477	-0.535491	0.00402643	0.0301314	0.93438	0.0207277	0.947026	0.565623	0.00348699	0.556219	0.00237704	-0.0094037	0.971411
C2_02450C	orf19.1569	UTP22	0.626112	6.55372e-11	0.408835	0.000177595	0.0208865	0.900674	-0.217277	0.0493191	-0.605225	2.50494e-10	-0.387948	0.000145907
CR_07390C	orf19.6129	MRPL8	1.01719	9.3066e-41	0.72562	2.98187e-19	0.0209021	0.872658	-0.291568	0.000385337	-0.996286	3.96802e-39	-0.704718	3.38029e-19
CR_04430W	orf19.533	orf19.533	-2.07651	NA	-1.41298	NA	-1.75591	NA	0	NA	0	NA	0	NA
C1_00760W	orf19.6030	orf19.6030	-0.217991	0.00288721	-0.20765	0.0139617	0.0213827	0.847845	0.0103416	0.945318	0.239374	0.000819084	0.229032	0.00230187
C2_02610C	orf19.1587	HGT20	1.13154	9.33465e-17	-0.849903	1.66966e-06	0.0218703	0.934688	-1.98144	8.81544e-39	-1.10967	3.17387e-16	0.871773	1.85952e-07
CR_06580W	orf19.693	orf19.693	-2.07237	0.295716	2.05501	NA	-3.60567	NA	4.12739	0.0147969	-1.5333	0.538367	-5.66069	0.00109373
C1_08390C	orf19.384	orf19.384	-0.252588	0.000105893	-0.129153	0.122814	0.0220112	0.826164	0.123435	0.106583	0.274599	1.85573e-05	0.151165	0.0339233
C1_08670W	orf19.4725	SWI6	0.348469	1.50696e-06	-0.061189	0.617176	0.0222694	0.848787	-0.409658	2.26086e-08	-0.326199	6.31519e-06	0.0834584	0.364901
C7_03850W	orf19.7197	orf19.7197	0.732142	0.0362628	0.63331	0.146111	0.0223322	0.970879	-0.0988325	0.864342	-0.70981	0.039535	-0.610978	0.107825
C2_07400C	orf19.1891	APR1	-0.343582	7.90356e-06	-0.123466	0.240162	0.0227188	0.850302	0.220116	0.00781057	0.366301	1.4199e-06	0.146184	0.0898733
C1_03130C	orf19.3006	GGA2	-0.265337	0.000196877	-0.0450503	0.715147	0.0227623	0.836609	0.220287	0.00329343	0.288099	3.9749e-05	0.0678126	0.445791
CR_04160C	orf19.500	orf19.500	0.881574	3.67137e-08	0.634583	0.000646873	0.0227924	0.940367	-0.246991	0.202748	-0.858781	7.18543e-08	-0.61179	0.000421703
C2_05220C	orf19.3552	orf19.3552	0.150324	0.0460654	0.00949599	0.948873	0.0228269	0.834389	-0.140828	0.0796529	-0.127497	0.0925084	0.0133309	0.898488
C5_05250C	orf19.4018	orf19.4018	0.265749	0.00347849	0.0605149	0.696187	0.0233814	0.866808	-0.205235	0.0377077	-0.242368	0.00759793	-0.0371336	0.766051
C1_10910C	orf19.2326	orf19.2326	0.365576	0.000151736	0.0423329	0.8153	0.024332	0.874266	-0.323243	0.00137507	-0.341244	0.000387694	-0.0180009	0.901434
C2_09900C	orf19.1361	TIM23	0.3449	0.000284702	0.00228743	0.987393	0.0246207	0.868576	-0.342613	0.000450526	-0.320279	0.000722391	0.0223333	0.873702
C1_07910C	orf19.5064	MRPL3	0.43152	5.32078e-09	0.0360023	0.801889	0.0258854	0.8291	-0.395518	1.89771e-07	-0.405635	3.84878e-08	-0.0101169	0.931709
C1_12670C	orf19.6356	orf19.6356	0.571931	8.34116e-06	0.135658	0.513975	0.0260356	0.907805	-0.436273	0.00136816	-0.545895	1.91766e-05	-0.109622	0.526592
C6_01260W	orf19.134	orf19.134	0.781622	0.041381	-0.479321	NA	0.0261596	0.969178	-1.26094	0.00178399	-0.755462	0.0453791	0.50548	0.297806
C4_06830C	orf19.3126	CCT6	0.166405	0.0294304	0.158146	0.074175	0.0265139	0.807607	-0.00825884	0.957521	-0.139891	0.0696278	-0.131632	0.102556
C1_09450C	orf19.4808	NUP188	0.197352	0.00544879	0.0312823	0.805301	0.0266753	0.796938	-0.16607	0.028095	-0.170677	0.0168461	-0.00460697	0.962717
C4_03150W	orf19.2675	orf19.2675	0.273637	0.00302192	0.231941	0.0312893	0.0272032	0.847845	-0.0416965	0.779825	-0.246434	0.00754485	-0.204738	0.0371039
C5_04290C	orf19.3914	orf19.3914	0.571066	6.76114e-15	0.075276	0.533179	0.0273083	0.818859	-0.49579	3.31366e-11	-0.543758	1.16788e-13	-0.0479678	0.641991
C2_03780C	orf19.843	orf19.843	-0.334884	2.58948e-06	-0.197557	0.0215003	0.0278758	0.796692	0.137327	0.105393	0.36276	2.48932e-07	0.225433	0.00286726
C5_02740W	orf19.4294	orf19.4294	0.324464	0.00237102	-0.216265	0.112377	0.0280421	0.864923	-0.54073	2.92234e-07	-0.296422	0.0053701	0.244307	0.0366004
C1_08230C	orf19.5102	PLB5	-3.54854	0	0.364429	1.63357e-05	0.0282253	0.818645	3.91297	0	3.57677	0	-0.336204	2.68083e-05
C1_03480C	orf19.3050	AGE1	-0.333242	1.77594e-05	-0.000938573	0.995143	0.0283156	0.811033	0.332303	2.99886e-05	0.361557	2.31091e-06	0.0292541	0.79008
C1_02790W	orf19.2967	TIF34	0.319423	1.23829e-05	0.166638	0.0681423	0.0291439	0.794634	-0.152786	0.0683349	-0.290279	6.93566e-05	-0.137494	0.0991997
C1_10660W	orf19.1837	TBP1	0.176255	0.0165559	0.0776644	0.45935	0.0292474	0.779551	-0.0985906	0.257105	-0.147008	0.0475878	-0.0484169	0.600248
C5_00630C	orf19.926	EXO1	0.304409	1.57042e-05	-0.193989	0.02585	0.0293575	0.785153	-0.498398	1.15158e-12	-0.275051	9.38357e-05	0.223347	0.00347293
C4_02470C	orf19.2755	PRE7	0.264054	0.000307162	-0.0449884	0.725182	0.0294183	0.788156	-0.309043	2.68968e-05	-0.234636	0.00134849	0.0744067	0.41353
C3_00790W	orf19.5376	orf19.5376	-0.42718	3.42184e-06	-0.173886	0.157324	0.0295464	0.837743	0.253294	0.0141666	0.456727	5.03924e-07	0.203433	0.0492283
C5_00900C	orf19.1977	URA4	0.337732	4.04811e-05	-0.0674351	0.629465	0.0295766	0.818877	-0.405167	1.30414e-06	-0.308155	0.000174472	0.0970118	0.35116
C5_05110C	orf19.4003	TIP20	-0.452369	7.26611e-09	-0.17588	0.0818347	0.0302962	0.800911	0.276489	0.0012598	0.482665	4.62941e-10	0.206176	0.0176142
C6_02380W	orf19.3481	orf19.3481	0.297522	6.92597e-05	0.148696	0.120365	0.0304328	0.78748	-0.148825	0.0828745	-0.267089	0.00035202	-0.118264	0.173336
C6_02370C	orf19.3480	orf19.3480	0.291108	0.000226001	0.0335908	0.817307	0.0306842	0.796105	-0.257517	0.00170006	-0.260424	0.000968855	-0.00290658	0.979747
C2_09040W	orf19.200	orf19.200	0.181643	0.017955	-0.212527	0.0131359	0.0307906	0.775835	-0.39417	5.15484e-08	-0.150853	0.051731	0.243318	0.00135464
C5_02320C	orf19.4240	orf19.4240	-0.347319	5.85561e-06	0.00768451	0.959458	0.0308815	0.789311	0.355004	6.48939e-06	0.378201	5.66479e-07	0.023197	0.834332
C4_04870C	orf19.3792	orf19.3792	0.255652	4.39012e-05	0.0173007	0.885668	0.0309894	0.735391	-0.238351	0.000206218	-0.224662	0.000336184	0.0136887	0.882675
C1_10470W	orf19.989	orf19.989	0.257534	0.000285852	0.0291575	0.823358	0.0312271	0.764708	-0.228377	0.00195452	-0.226307	0.00145898	0.00206967	0.982899
CR_05700C	orf19.6642	orf19.6642	-0.285211	0.00224946	-0.0859504	0.558293	0.0317172	0.820125	0.199261	0.0578318	0.316928	0.000507599	0.117668	0.288041
C1_11350C	orf19.668	TOS4	0.534401	3.10503e-13	-0.0917927	0.420478	0.0324331	0.77639	-0.626194	1.91861e-17	-0.501968	7.24793e-12	0.124226	0.163633
C1_11070W	orf19.2309	PET127	0.810361	6.29409e-14	0.369607	0.00463654	0.0328064	0.855801	-0.440754	0.000114827	-0.777555	5.67017e-13	-0.336801	0.00517942
C1_12210W	orf19.5243	TRP3	0.170825	0.00516976	0.358789	4.3438e-09	0.0330044	0.695592	0.187964	0.00224709	-0.137821	0.0260598	-0.325784	2.33761e-08
C2_03590C	orf19.861	CAP4	-0.444155	0.00365799	-0.222547	0.287535	0.0333588	0.888277	0.221608	0.236131	0.477514	0.00141469	0.255906	0.134484
C7_02780W	orf19.5184	orf19.5184	-0.217218	0.000540695	0.0361398	0.739793	0.0341715	0.697237	0.253358	5.77461e-05	0.251389	4.1691e-05	-0.00196833	0.981952
CR_02870W	orf19.2844	APL4	-0.359992	7.43159e-08	-0.269267	0.000341427	0.0347859	0.724461	0.0907249	0.303117	0.394778	2.36195e-09	0.304053	1.09067e-05
CR_01000C	orf19.3256	SLN1	-1.45286	4.24238e-05	0.0691972	0.914126	0.0349304	0.952238	1.52206	2.67888e-05	1.48779	2.22289e-05	-0.0342668	0.944717
C4_03050C	orf19.2686	orf19.2686	0.498099	1.2134e-08	-0.106538	0.443178	0.0356041	0.796692	-0.604636	1.01706e-11	-0.462495	1.16751e-07	0.142142	0.189539
C1_04370C	orf19.5201	orf19.5201	0.269189	0.000779335	0.0502284	0.719728	0.0356674	0.761721	-0.218961	0.0101403	-0.233522	0.00369979	-0.0145611	0.901931
C7_03370C	orf19.1338	orf19.1338	-0.278776	0.00287386	-0.370225	0.000279292	0.0362087	0.789737	-0.091449	0.484699	0.314984	0.000547209	0.406433	1.54183e-05
C2_03870W	orf19.837	GNA1	-0.285544	0.000867898	-0.207	0.043899	0.0367713	0.767357	0.0785435	0.516125	0.322315	0.000121722	0.243772	0.00631071
C6_01470W	orf19.3437	orf19.3437	0.597296	0.000176079	-0.127476	0.649161	0.0368491	0.889845	-0.724772	1.00322e-05	-0.560447	0.0004051	0.164325	0.43592
C4_02800W	orf19.2715	RPC53	0.264423	0.000857607	0.275194	0.00167737	0.0376463	0.743934	0.0107713	0.947544	-0.226776	0.00446262	-0.237547	0.00389845
C5_00870C	orf19.1980	GIT4	-0.761836	0.0169239	0.17841	0.727455	0.0378932	0.940655	0.940246	0.0033857	0.79973	0.0103657	-0.140516	0.725519
C1_05660C	orf19.2485	orf19.2485	0.221962	0.00254226	0.0160404	0.909883	0.0380158	0.712615	-0.205921	0.00710438	-0.183946	0.0133254	0.0219754	0.829596
CR_06230W	orf19.3874	orf19.3874	-0.412184	1.42076e-06	-0.03342	0.836311	0.0380889	0.764167	0.378764	1.8867e-05	0.450273	9.42465e-08	0.0715089	0.520067
C1_01710W	orf19.3360	orf19.3360	0.924329	1.03182e-25	0.159963	0.225685	0.0386906	0.789743	-0.764366	2.15356e-17	-0.885638	9.59021e-24	-0.121272	0.299572
C4_06230C	orf19.2915	orf19.2915	-0.275902	0.000214449	-0.13174	0.184329	0.0389412	0.713113	0.144162	0.0972062	0.314843	1.60702e-05	0.170681	0.0359431
C3_01800C	orf19.1666	orf19.1666	-0.811575	5.15347e-11	-0.275607	0.0825551	0.0389781	0.8401	0.535968	6.22182e-05	0.850553	4.21091e-12	0.314585	0.0217516
CR_03380W	orf19.2384	MTG1	0.290092	0.0288422	0.357	0.0158485	0.0394644	0.843432	0.0669081	0.736648	-0.250627	0.059764	-0.317535	0.018898
C5_02940C	orf19.4318	MIG1	0.825385	1.52213e-27	0.163254	0.113823	0.0402823	0.734493	-0.662132	8.58274e-18	-0.785103	4.64289e-25	-0.122972	0.193935
C4_05260W	orf19.2631	orf19.2631	0.240537	0.0126563	0.0840641	0.56794	0.0403114	0.768524	-0.156473	0.153934	-0.200225	0.0397036	-0.0437528	0.732134
C4_03410W	orf19.3367	orf19.3367	0.325856	5.09579e-05	-0.0881982	0.470794	0.040416	0.731801	-0.414054	2.5497e-07	-0.28544	0.000394515	0.128614	0.17048
CR_09060W	orf19.7303	orf19.7303	-2.02917	0.0529651	0.123433	NA	0.751255	0.450075	2.1526	0.047826	2.78043	0.0036852	0.627822	0.530235
C5_01400W	orf19.1926	SEF2	0.72148	5.24188e-07	-0.57225	0.000539085	0.0408394	0.860011	-1.29373	1.41403e-19	-0.68064	2.04806e-06	0.61309	5.82904e-05
C1_03080C	orf19.3001	TEM1	-2.01777	NA	-1.82693	NA	0.56925	NA	0.190834	NA	2.58702	NA	2.39618	NA
C5_01680C	orf19.3207	CCN1	0.0874682	0.472647	-0.288924	0.0116875	-0.146584	0.200766	-0.376392	0.000164919	-0.234052	0.01888	0.14234	0.22145
C1_10560C	orf19.1002	orf19.1002	-0.397382	0.00254226	-0.170762	0.358726	0.0418174	0.832808	0.226619	0.142329	0.439199	0.00063638	0.21258	0.151558
C7_02330W	orf19.6478	YCF1	0.444479	4.68043e-08	-0.0817355	0.541151	0.0420251	0.733123	-0.526214	1.63552e-10	-0.402454	7.55811e-07	0.123761	0.216017
CR_02100C	orf19.2610	orf19.2610	0.298118	0.00521049	0.255596	0.0426177	0.0423143	0.78748	-0.0425216	0.807031	-0.255804	0.017132	-0.213282	0.0645894
C5_02760W	orf19.4297	CKB2	0.259347	0.00394866	0.166715	0.153902	0.0424248	0.744925	-0.0926323	0.436636	-0.216922	0.0167704	-0.12429	0.240651
C4_00380W	orf19.5665	orf19.5665	-0.156519	0.0349548	-0.00523892	0.969278	0.0426352	0.660282	0.15128	0.0534795	0.199154	0.00482152	0.0478741	0.600895
C2_07650C	orf19.1860.1	orf19.1860.1	-0.637685	1.33483e-24	-0.0110982	0.933562	0.0427167	0.634326	0.626587	2.12249e-23	0.680401	6.1655e-28	0.0538149	0.518818
C6_01980C	orf19.688	orf19.688	0.467434	2.82023e-08	0.128778	0.298287	0.0430768	0.736285	-0.338656	0.000130279	-0.424357	4.59033e-07	-0.0857015	0.439133
CR_03040C	orf19.2425	HGT18	-0.394496	1.31627e-05	-0.121821	0.354039	0.0430919	0.743953	0.272676	0.00546557	0.437588	9.02811e-07	0.164913	0.110732
C2_04400W	orf19.4513	orf19.4513	0.352658	3.71599e-10	0.238113	0.000154825	0.0432274	0.581536	-0.114545	0.0853759	-0.30943	4.1368e-08	-0.194885	0.0011569
C3_01950C	orf19.1653	orf19.1653	-0.35613	8.03377e-05	0.0618086	0.68877	0.0432644	0.73983	0.417939	4.35637e-06	0.399395	6.54919e-06	-0.0185442	0.8904
C3_00860W	orf19.6163	CSE4	0.528773	2.58736e-09	0.181444	0.129709	0.0435283	0.749719	-0.34733	0.000214094	-0.485245	4.40714e-08	-0.137916	0.206032
C3_01200W	orf19.3159	UTP20	0.568313	8.77314e-12	0.338307	0.000363701	0.0442968	0.726866	-0.230006	0.0133372	-0.524016	3.09189e-10	-0.29401	0.00101875
C4_00140C	orf19.5639	HIS4	0.413866	1.32322e-07	0.812512	2.60816e-25	0.0446032	0.695592	0.398646	4.22883e-07	-0.369263	2.54863e-06	-0.767909	7.49431e-24
C1_01470W	orf19.3333	orf19.3333	0.377477	2.76399e-06	0.222052	0.0223873	0.044611	0.704213	-0.155426	0.0988086	-0.332866	3.61962e-05	-0.177441	0.0487297
C1_04380W	orf19.5200	SIT4	0.219951	0.0100364	0.186198	0.0709468	0.0461535	0.695592	-0.0337535	0.808195	-0.173798	0.0451528	-0.140044	0.142113
C1_05050C	orf19.58	RRP6	0.490054	4.36536e-10	0.382544	9.98007e-06	0.0463409	0.689269	-0.10751	0.291581	-0.443713	1.6021e-08	-0.336204	4.47235e-05
C2_06700W	orf19.3152	AMO2	0.68424	5.95992e-05	-0.00831364	0.980385	0.0463976	0.865679	-0.692554	9.06557e-05	-0.637843	0.000169003	0.0547112	0.830103
C3_02500W	orf19.240	PAM17	0.364032	1.29612e-08	0.000227721	0.997498	0.0468666	0.602219	-0.363805	2.23628e-08	-0.317166	7.77704e-07	0.0466389	0.592368
C3_04300C	orf19.5873	POL1	0.413581	5.38999e-07	-0.0272237	0.86867	0.0469721	0.697974	-0.440804	1.59792e-07	-0.366609	8.90409e-06	0.0741958	0.496558
C4_01060W	orf19.4683	MLP1	0.396041	9.76482e-07	-0.0325368	0.831681	0.0476333	0.682519	-0.428578	1.50196e-07	-0.348408	1.70216e-05	0.0801701	0.439345
C4_06100W	orf19.4719	CWH41	-0.492266	3.31125e-11	-0.322787	0.000119779	0.0478319	0.652073	0.169479	0.0552737	0.540098	2.1087e-13	0.370619	1.68421e-06
C7_02350C	orf19.6476	orf19.6476	-0.632149	2.49411e-14	-0.221586	0.0314999	0.0479693	0.690943	0.410563	2.78192e-06	0.680118	1.52399e-16	0.269555	0.00267759
C6_00020W	orf19.6338	orf19.6338	-0.594277	0.00231359	0.0700587	0.843131	0.0480308	0.86894	0.664336	0.000835556	0.642308	0.000761629	-0.022028	0.938393
C1_06890C	orf19.6220.4	orf19.6220.4	0.54482	0.00122296	-0.113463	0.695034	0.0485044	0.851568	-0.658283	0.000104908	-0.496315	0.00318725	0.161968	0.441544
C3_03350W	tE(UUC)1	tE(UUC)1	-4.89894	8.20313e-105	0.294613	0.0411599	0.048598	0.787073	5.19355	1.73331e-117	4.94753	7.03534e-107	-0.246015	0.062321
C2_10290W	orf19.1750	SLR1	0.240279	0.00238923	0.0642057	0.607317	0.0491661	0.647215	-0.176073	0.0400238	-0.191113	0.0172974	-0.0150395	0.895114
C6_04220C	orf19.1078	HBR2	0.533016	1.5063e-14	-0.443572	1.29956e-08	0.0496291	0.62221	-0.976588	3.07392e-44	-0.483387	3.23933e-12	0.493202	1.76795e-11
C1_00160C	orf19.6090	orf19.6090	0.794818	3.54014e-06	0.542926	0.00901446	0.0502194	0.861158	-0.251892	0.227883	-0.744598	1.24695e-05	-0.492707	0.00949295
CR_06970C	orf19.2368	orf19.2368	0.357328	0.038911	-0.0110184	0.97183	0.0511098	0.843624	-0.368346	0.0448148	-0.306218	0.0773822	0.0621282	0.793081
C5_01760C	orf19.3199	PIKA	-0.381578	9.38565e-08	-0.109883	0.281259	0.0514391	0.601322	0.271694	0.000356113	0.433017	7.91693e-10	0.161322	0.0442063
C1_11210C	orf19.681	HAP43	0.629873	2.7166e-21	-0.095154	0.343168	0.0515184	0.586379	-0.725027	1.29433e-27	-0.578355	3.83682e-18	0.146672	0.0579406
C1_01780C	orf19.4546	HOL4	-0.870474	3.60871e-34	-0.0272567	0.847615	0.0515833	0.613756	0.843217	1.27593e-31	0.922057	2.69665e-38	0.07884	0.393745
C3_03900C	orf19.6925	HTB1	0.627367	1.17096e-27	0.032329	0.769644	0.0518864	0.521407	-0.595038	1.05134e-24	-0.57548	1.84594e-23	0.0195573	0.822088
C1_01690C	orf19.3358	LSC1	-0.251714	9.04966e-06	-0.203205	0.00124633	0.0519083	0.48664	0.0485095	0.556975	0.303623	4.59737e-08	0.255113	7.79398e-06
C1_08160W	orf19.5093	SFH1	0.235608	0.0136962	-0.0286363	0.871728	0.05234	0.686699	-0.264244	0.00713081	-0.183268	0.0598354	0.0809762	0.492067
C1_07250C	orf19.4442	ALG9	-0.641616	3.35912e-10	0.0304953	0.877042	0.0527707	0.72582	0.672111	8.83336e-11	0.694387	6.7123e-12	0.0222754	0.885453
C1_14220C	orf19.7231	FTR2	-1.48766	6.2346e-08	0.201425	0.635588	0.0528046	0.90152	1.68909	8.8945e-10	1.54047	1.52435e-08	-0.14862	0.667105
C2_07100W	orf19.2265	SNF12	0.215333	0.001835	-0.00592479	0.964384	0.0528579	0.560392	-0.221257	0.00177627	-0.162475	0.0213189	0.0587827	0.495542
CR_07010W	orf19.2364	MIS11	0.994204	3.49312e-49	0.25692	0.0012998	0.0539887	0.5791	-0.737283	2.90111e-27	-0.940215	4.55215e-44	-0.202932	0.00753911
C3_07610W	orf19.6729	TIP120	-0.62698	0.0397937	-0.35587	0.396202	0.0540803	0.906942	0.27111	0.516125	0.68106	0.0211685	0.40995	0.224452
C4_07060W	orf19.3103	orf19.3103	0.235385	0.000139458	0.20861	0.00249764	0.0546603	0.501161	-0.0267747	0.795347	-0.180724	0.00400974	-0.15395	0.0195253
C2_07680W	orf19.2214	orf19.2214	0.371588	9.40584e-07	0.0306097	0.833572	0.0549949	0.60337	-0.340978	1.26201e-05	-0.316593	3.12562e-05	0.0243853	0.827741
C2_03830W	orf19.839	orf19.839	0.152256	0.0484307	0.0852635	0.422745	0.0552824	0.564902	-0.0669925	0.50783	-0.0969737	0.231278	-0.0299811	0.765003
C1_11870W	orf19.5280	MUP1	0.701489	6.7027e-16	0.405824	3.67765e-05	0.0562002	0.664753	-0.295664	0.00171985	-0.645289	1.11138e-13	-0.349624	0.00018112
C2_03380W	orf19.886	PAN1	-0.227094	0.00405581	0.0274393	0.849021	0.0567038	0.580218	0.254533	0.00139816	0.283798	0.00019808	0.0292644	0.78305
C1_04040C	orf19.4479	orf19.4479	0.660787	1.05673e-16	0.372429	3.50122e-05	0.0567215	0.62617	-0.288358	0.000798386	-0.604065	3.41758e-14	-0.315707	0.000226474
C3_02490C	orf19.239	STH1	0.370099	2.00252e-09	-0.148861	0.0583024	0.0568913	0.497978	-0.51896	2.63117e-17	-0.313208	4.28522e-07	0.205752	0.00200889
C1_10990C	orf19.2315	RTG3	0.221246	0.00316815	0.1907	0.0295699	0.0574965	0.558762	-0.0305456	0.805321	-0.163749	0.0329512	-0.133204	0.107645
C6_00180C	orf19.1178	orf19.1178	-0.453968	0.0402336	-0.0830487	0.829459	0.0580676	0.853914	0.370919	0.135621	0.512035	0.0163561	0.141116	0.605539
C5_01570C	orf19.4151	SPO1	1.44998	0.000488978	0.397612	NA	0.0581064	0.940367	-1.05237	0.0176545	-1.39188	0.000721323	-0.339506	0.548985
C4_05920C	orf19.4404	PGA49	-0.385779	0.000115702	-0.0113798	0.951422	0.0581593	0.676041	0.3744	0.000310181	0.443939	5.78152e-06	0.0695391	0.596671
C2_03330C	orf19.895	HOG1	-0.42078	1.38809e-08	-0.132507	0.190437	0.0585936	0.562284	0.288273	0.000248022	0.479374	5.61703e-11	0.191101	0.018898
C6_03830W	orf19.5758	SAL6	0.542044	1.65987e-11	0.0146887	0.931852	0.0589338	0.607097	-0.527355	1.07365e-10	-0.48311	2.04484e-09	0.0442451	0.69807
C3_01760W	orf19.1669	AFG3	0.197804	0.00460922	-0.0468174	0.687303	0.0593235	0.506739	-0.244621	0.000464194	-0.13848	0.0549898	0.106141	0.176721
C7_01930C	orf19.6528	orf19.6528	-0.409186	0.00292216	-0.17211	0.378463	0.060027	0.758323	0.237076	0.143169	0.469213	0.000446542	0.232137	0.13182
C1_12550C	orf19.3761	CDC54	0.760973	6.06565e-33	-0.0425621	0.727455	0.0601194	0.510116	-0.803535	2.38253e-35	-0.700853	3.72383e-28	0.102682	0.208594
C1_06600W	orf19.6250	orf19.6250	-0.28335	3.23413e-05	-0.0893004	0.361408	0.061082	0.494654	0.19405	0.0079268	0.344432	2.35531e-07	0.150382	0.0429458
C5_00590W	orf19.930	PET9	0.293607	2.92736e-05	0.0719025	0.50076	0.0613487	0.507812	-0.221705	0.00263204	-0.232259	0.00107917	-0.0105538	0.920873
C1_10130W	snR10a	snR10a	1.22974	4.77329e-12	0.946956	1.66966e-06	0.0613595	0.8391	-0.282781	0.188909	-1.16838	4.34705e-11	-0.885596	2.23035e-06
C4_01390W	orf19.4647	HAP3	0.380323	8.87533e-05	-0.494113	1.584e-06	0.0614944	0.649208	-0.874436	6.70238e-21	-0.318829	0.00108929	0.555607	7.75695e-09
C2_03060W	orf19.5793	PR26	0.161132	0.00576156	-0.0120157	0.913217	0.0622021	0.381359	-0.173147	0.00359013	-0.0989296	0.108248	0.0742178	0.267892
C1_08730W	orf19.4731	orf19.4731	0.383989	1.00887e-07	-0.336604	2.86156e-05	0.0624095	0.525067	-0.720593	4.54592e-24	-0.32158	8.9477e-06	0.399013	8.40878e-08
C2_06080C	orf19.4112	orf19.4112	-0.170504	0.0118087	0.0412509	0.716499	0.0624394	0.453819	0.211755	0.00185457	0.232944	0.000299196	0.0211885	0.81894
C7_03800W	orf19.7202	orf19.7202	-0.848966	0.0243251	-0.19615	0.752675	0.0633834	0.911376	0.652816	0.13017	0.912349	0.0129978	0.259533	0.569045
C1_11410C	orf19.8278	orf19.8278	0.493279	0.000116896	0.543491	0.000112835	0.0641222	0.738552	0.0502116	0.813624	-0.429157	0.000801814	-0.479369	0.00030099
C1_06850W	orf19.6225	PCL7	0.293486	0.000336712	-0.0842772	0.509662	0.0643124	0.558971	-0.377763	4.82897e-06	-0.229174	0.00577387	0.14859	0.114948
C4_01650C	orf19.4628	orf19.4628	0.272357	0.0123932	0.126002	0.425511	0.0644135	0.664753	-0.146355	0.263182	-0.207943	0.0610789	-0.0615887	0.667291
C3_03290C	orf19.328	NPR2	0.337573	0.00659331	0.113065	0.561745	0.0646174	0.712615	-0.224508	0.109855	-0.272955	0.0298592	-0.0484472	0.777424
C2_03230C	orf19.908	FEN12	-0.231249	0.00151921	-0.231295	0.00479154	0.0646308	0.487658	-4.68273e-05	0.999929	0.295879	2.68088e-05	0.295926	4.88472e-05
C2_06250C	orf19.5487	CDC46	0.70424	1.82959e-24	0.0023271	0.984927	0.0664054	0.498085	-0.701913	1.57395e-23	-0.637835	2.53126e-20	0.0640783	0.502841
CR_06530W	orf19.713	orf19.713	0.331404	8.82112e-06	0.0100364	0.949674	0.0667193	0.505012	-0.321368	2.68762e-05	-0.264685	0.000432193	0.0566829	0.568102
CR_01710W	orf19.2564	orf19.2564	0.391621	0.000554513	0.510182	2.446e-05	0.0677575	0.674626	0.118561	0.426725	-0.323863	0.00456528	-0.442424	0.000113375
C6_00670W	orf19.4192	CDC14	0.259711	0.00183148	-0.0501751	0.731034	0.0678494	0.534673	-0.309887	0.000249565	-0.191862	0.0243676	0.118025	0.228217
C1_12380C	orf19.5226	WRS1	0.200105	0.00295215	0.090587	0.331635	0.0678614	0.417609	-0.109518	0.160371	-0.132243	0.0591343	-0.0227257	0.806755
C2_05470W	orf19.3577	COQ5	0.252995	0.00643946	-0.142326	0.265839	0.0680114	0.576757	-0.39532	1.81199e-05	-0.184983	0.0523453	0.210337	0.0367541
C2_03950W	orf19.828	orf19.828	0.221091	0.00260999	-0.160933	0.074027	0.0680572	0.46641	-0.382024	9.65442e-08	-0.153034	0.0436506	0.22899	0.00248514
C4_07100C	orf19.3098	orf19.3098	0.307366	9.37473e-05	0.192551	0.0474968	0.0683244	0.51631	-0.114816	0.237401	-0.239042	0.0027111	-0.124226	0.179606
C1_01910W	orf19.4532	orf19.4532	0.394028	0.000408022	0.413968	0.00060486	0.0683785	0.65984	0.0199399	0.928583	-0.32565	0.00377039	-0.34559	0.00248315
CR_02140W	orf19.2614	RSR1	-1.33767	1.81018e-75	-0.102275	0.345488	0.0692821	0.482945	1.23539	3.48208e-63	1.40695	1.68377e-83	0.171557	0.0376618
C6_00270W	orf19.1186	orf19.1186	-0.380159	2.68374e-07	-0.0393118	0.773495	0.0696756	0.474225	0.340847	8.48726e-06	0.449834	5.6294e-10	0.108987	0.216811
C5_02900W	orf19.4312	SPT8	0.206135	0.0125465	0.052514	0.706394	0.0698483	0.505993	-0.153621	0.0940455	-0.136286	0.113431	0.0173342	0.884193
C6_00510C	orf19.4208	RAD52	-0.182043	0.0289275	-0.0453472	0.745305	0.0708083	0.487658	0.136695	0.145877	0.252851	0.00129577	0.116156	0.209235
C2_04780W	orf19.188	orf19.188	0.177432	0.0224902	-0.235946	0.00531286	0.0709898	0.45494	-0.413378	1.41872e-08	-0.106443	0.197387	0.306935	4.27922e-05
C5_04330W	orf19.3919.1	orf19.3919.1	-0.27219	1.3676e-05	-0.213872	0.00267936	0.0710546	0.367096	0.0583176	0.520038	0.343244	1.86886e-08	0.284927	7.57938e-06
C3_02780W	orf19.269	SES1	-0.164789	0.00703648	0.0196448	0.858096	0.0716458	0.322224	0.184434	0.00279117	0.236435	4.8248e-05	0.0520009	0.482177
C5_02730C	orf19.4293	orf19.4293	0.219957	0.00178237	-0.00755629	0.95452	0.0719347	0.4178	-0.227513	0.00174263	-0.148022	0.0423281	0.079491	0.354109
C2_08540C	orf19.3625	orf19.3625	0.258659	0.0297365	-0.280175	0.0506357	0.0719633	0.648601	-0.538834	3.29582e-06	-0.186695	0.127808	0.352138	0.00415055
C4_04590W	orf19.3822	SCS7	-0.667467	0.0104306	0.180361	0.659755	0.0720546	0.849271	0.847828	0.0011201	0.739521	0.00350788	-0.108306	0.746381
C5_01890W	orf19.3183	orf19.3183	-0.224457	0.00370337	-0.0937796	0.391354	0.0725194	0.452484	0.130678	0.144494	0.296977	6.31852e-05	0.166299	0.0432179
C1_05880W	orf19.2461	PRN4	-0.420192	0.00128409	0.190464	0.278947	0.0726893	0.685024	0.610656	1.70737e-06	0.492882	0.000104791	-0.117775	0.460372
CR_02760C	orf19.2834	RPD3	0.341304	0.000176889	0.0251119	0.887155	0.0731388	0.549715	-0.316192	0.000845279	-0.268165	0.00362799	0.0480269	0.700822
C2_05890C	orf19.5211	IDP1	0.401222	5.87981e-09	-0.0688657	0.540282	0.0733465	0.421539	-0.470088	1.19734e-11	-0.327875	2.26076e-06	0.142212	0.0746769
C1_04190C	orf19.1053	BST1	-0.699627	3.31773e-14	-0.0329514	0.853321	0.074136	0.553587	0.666676	1.8098e-12	0.773763	2.50506e-17	0.107087	0.356186
CR_09220C	orf19.7320	LIP7	-1.98904	0.413307	-0.213753	NA	-0.578538	NA	1.77528	0.527336	1.4105	0.573058	-0.364785	0.891422
CR_06950C	orf19.2369.1	ATX1	0.704745	1.23304e-08	-0.473826	0.00146054	0.0748536	0.682519	-1.17857	6.81154e-21	-0.629892	3.56165e-07	0.54868	5.12555e-05
C4_00040W	orf19.367	CNH1	-0.377467	1.21329e-05	0.190362	0.0735322	0.0750076	0.511037	0.567829	1.52593e-11	0.452474	8.55798e-08	-0.115354	0.258809
C4_00400W	orf19.5667	MNR2	-0.470806	1.90174e-07	0.0323719	0.85134	0.0750224	0.534461	0.503178	4.17884e-08	0.545828	8.08952e-10	0.0426505	0.734244
C2_05800C	orf19.6893	orf19.6893	-0.257841	0.000786898	-0.192255	0.0353221	0.0752538	0.43624	0.065586	0.553144	0.333094	7.29058e-06	0.267508	0.000623095
C1_04600C	orf19.6853	orf19.6853	0.35094	5.03177e-07	0.0893119	0.388764	0.0754229	0.407399	-0.261628	0.000345788	-0.275517	9.29287e-05	-0.0138891	0.895437
C1_05470W	orf19.417	MTM1	0.196806	0.0225656	-0.032271	0.834904	0.0756621	0.481077	-0.229077	0.00958042	-0.121144	0.183445	0.107933	0.276366
C2_07190C	orf19.2275	orf19.2275	0.223279	0.00444916	-0.0249067	0.863241	0.0758583	0.437938	-0.248185	0.00182018	-0.14742	0.0716983	0.100765	0.266887
C2_09060C	orf19.198	ASN1	0.697756	1.5749e-34	0.185256	0.00767852	0.0758909	0.309411	-0.512499	6.89107e-19	-0.621865	1.25732e-27	-0.109365	0.108209
C1_10080W	orf19.4875	orf19.4875	1.57083	3.18872e-71	-0.0773592	0.640134	0.0762513	0.563076	-1.64819	1.21177e-74	-1.49458	8.85523e-65	0.15361	0.185359
C4_04320W	orf19.1415	FRE10	1.82856	9.50654e-36	0.0258737	0.943599	0.0768183	0.761686	-1.80269	3.11813e-32	-1.75175	2.99855e-33	0.0509446	0.838097
C6_02570C	orf19.5526	SEC20	-0.274309	0.00555171	-0.186164	0.135019	0.0768774	0.541913	0.0881453	0.525102	0.351187	0.000218382	0.263041	0.0102628
C7_03210W	orf19.5134	orf19.5134	0.575495	1.42214e-06	0.30003	0.0496189	0.0771165	0.662022	-0.275465	0.041082	-0.498378	2.93695e-05	-0.222913	0.115665
C4_00480W	orf19.5677	DUR4	0.57385	0.000772749	0.353403	0.108799	0.077731	0.762559	-0.220447	0.299399	-0.496119	0.00366963	-0.275672	0.168445
C5_02230W	orf19.4230	PRE4	0.153298	0.00714456	-0.0320667	0.740326	0.078539	0.232953	-0.185364	0.00120139	-0.0747587	0.230647	0.110606	0.0699948
C4_01230C	orf19.4666	orf19.4666	-1.36143	2.27987e-41	-0.0381777	0.847615	0.079329	0.571887	1.32325	1.39424e-38	1.44076	2.78469e-46	0.117507	0.359294
C1_11160C	orf19.2299	orf19.2299	0.242231	0.0281175	0.294655	0.0153192	0.0799444	0.565874	0.0524246	0.755429	-0.162286	0.157993	-0.214711	0.0607102
CR_08120C	orf19.6373	DCP2	0.263886	0.00041738	0.095681	0.370155	0.0805223	0.391138	-0.168205	0.041099	-0.183363	0.017279	-0.0151587	0.891142
C1_09390W	orf19.4801	orf19.4801	0.286188	0.0130646	0.205353	0.164518	0.0806119	0.594766	-0.0808343	0.625046	-0.205576	0.0831559	-0.124741	0.364901
CR_00610W	orf19.7472	IFF4	-1.97423	0.197804	-1.22589	NA	-0.70732	NA	0.748341	0.74687	1.26691	0.440155	0.51857	0.780775
C2_04050C	orf19.815	DCK1	-1.3849	4.25479e-28	0.210563	0.212917	0.0808478	0.642389	1.59546	1.21932e-36	1.46574	1.59559e-31	-0.129715	0.404617
C7_04000W	orf19.7181	orf19.7181	-0.964126	0.00979524	-0.352573	0.519893	0.0811282	0.880449	0.611552	0.169049	1.04525	0.00402672	0.433701	0.3087
CR_08950W	orf19.7292	ARP2	-1.96141	NA	-2.37527	NA	-1.78185	NA	-0.413863	NA	0.179559	NA	0.593422	NA
C2_05720C	orf19.6883	OSH4	-0.193471	0.00965599	-0.108814	0.267777	0.0814628	0.36215	0.0846571	0.366081	0.274934	0.000108768	0.190277	0.0117213
C1_03060C	orf19.2998	TSR2	0.517515	6.84623e-08	0.426228	6.01692e-05	0.0815563	0.536177	-0.0912875	0.50734	-0.435959	5.83266e-06	-0.344671	0.000683129
C2_00200W	orf19.2112	orf19.2112	0.30311	0.00195875	0.216504	0.0688052	0.0817264	0.5221	-0.0866053	0.524664	-0.221383	0.0272057	-0.134778	0.235083
CR_06450W	orf19.721	orf19.721	0.582634	9.48629e-07	0.236657	0.139496	0.0818158	0.632829	-0.345977	0.00741254	-0.500818	2.53197e-05	-0.154841	0.297918
C6_04380W	orf19.1097	ALS2	0.482691	0.000301895	0.619626	1.14578e-05	0.0821476	0.663697	0.136935	0.439975	-0.400543	0.00289511	-0.537478	6.16166e-05
C2_04230W	orf19.797	BAT21	0.281743	0.000103418	0.484457	5.48556e-11	0.0822693	0.367661	0.202715	0.00841624	-0.199474	0.007317	-0.402188	1.574e-08
C4_03190W	orf19.2671	orf19.2671	0.430604	3.75839e-08	-0.189049	0.0583181	0.0823346	0.424867	-0.619653	1.87508e-15	-0.34827	9.77412e-06	0.271384	0.00127124
CR_07630C	orf19.6286.2	RPS27	0.294104	0.0126998	0.0244419	0.912163	0.0828504	0.583233	-0.269662	0.0289699	-0.211253	0.0830164	0.0584085	0.69893
C5_02300C	orf19.4236	RET2	-0.219604	0.000363883	-0.173724	0.0144548	0.0830671	0.259378	0.0458805	0.61437	0.302672	3.65077e-07	0.256791	2.78747e-05
C1_01600W	orf19.3350	MRP20	0.372214	7.06085e-08	-0.124371	0.19819	0.0838105	0.346802	-0.496584	7.89866e-13	-0.288403	3.52063e-05	0.208181	0.00615172
CR_03530W	orf19.4396	orf19.4396	0.325224	2.57425e-06	-0.196088	0.0167793	0.0851435	0.325237	-0.521312	1.16671e-14	-0.240081	0.00063638	0.281232	7.14083e-05
C4_04730W	orf19.3809	BAS1	0.510218	2.40354e-09	0.455493	9.20665e-07	0.0852596	0.458046	-0.0547245	0.686483	-0.424958	7.42772e-07	-0.370234	3.06288e-05
C5_01520C	orf19.4147	GLR1	0.248884	1.51786e-05	-0.0303662	0.773604	0.0858104	0.216355	-0.27925	1.56903e-06	-0.163074	0.00595916	0.116177	0.0733896
C1_10030W	orf19.4870	DBP3	0.500436	3.05279e-08	0.399962	5.50743e-05	0.0859542	0.478798	-0.100474	0.417143	-0.414482	5.03801e-06	-0.314008	0.000967182
CR_06070W	orf19.3859	orf19.3859	0.165005	0.0285509	-0.248194	0.00157087	0.086174	0.322595	-0.413199	2.57732e-09	-0.078831	0.341558	0.334368	2.12032e-06
C5_05470W	orf19.4045	EST1	0.171355	0.013882	0.378689	3.61275e-08	0.086523	0.285512	0.207334	0.00275486	-0.0848315	0.265334	-0.292166	1.02616e-05
C2_02280W	orf19.1546	orf19.1546	0.234692	0.019751	-0.0855844	0.57784	0.087134	0.486812	-0.320277	0.00136586	-0.147558	0.163373	0.172718	0.112897
C4_04770C	orf19.3803	MNN22	-0.78329	2.42783e-08	0.124569	0.578832	0.0872039	0.657446	0.907859	1.14696e-10	0.870494	3.24133e-10	-0.0373653	0.853493
C1_09010W	orf19.4757	NAR1	0.269926	0.0078084	0.255664	0.032597	0.0875037	0.505012	-0.0142619	0.944621	-0.182422	0.0829727	-0.168161	0.139865
C1_07780W	orf19.4713	orf19.4713	-0.238872	0.00382011	-0.116646	0.305018	0.0885324	0.378322	0.122226	0.218184	0.327404	3.38085e-05	0.205179	0.0174428
C1_11090C	orf19.2307	orf19.2307	0.192864	0.0104315	0.08872	0.404664	0.0892669	0.319044	-0.104144	0.244857	-0.103597	0.201169	0.000546907	0.995216
C1_10210C	orf19.4890	CLA4	-0.740002	2.03524e-26	-0.123571	0.206137	0.0894195	0.314885	0.616431	5.37032e-18	0.829422	3.98858e-33	0.21299	0.00531511
C1_11050W	orf19.2310	orf19.2310	0.866476	3.35541e-05	0.216991	0.527108	0.089579	0.785055	-0.649485	0.00348788	-0.776897	0.000184972	-0.127412	0.665183
C2_01730W	orf19.1484	orf19.1484	0.340471	0.0451828	-0.227357	0.339164	0.0899657	0.691807	-0.567828	0.000770213	-0.250506	0.149985	0.317322	0.0872764
CR_09820C	orf19.7555	orf19.7555	-1.927	0.396551	-0.688674	NA	0.163968	NA	1.23832	0.677876	2.09096	0.324301	0.852642	0.708648
C6_00250W	orf19.1183	orf19.1183	-0.502727	1.18184e-08	-0.0230773	0.89258	0.0907466	0.42843	0.47965	9.16657e-08	0.593473	7.979e-12	0.113824	0.289378
C1_03180W	orf19.3010	orf19.3010	-0.332389	0.00571131	-0.0819429	0.680049	0.0908155	0.555033	0.250446	0.0596662	0.423205	0.00024879	0.172758	0.204398
C3_03070W	orf19.304	orf19.304	0.423689	0.00427622	0.130004	0.58102	0.0909281	0.658397	-0.293685	0.0758378	-0.33276	0.0268432	-0.0390756	0.853768
C1_04740W	orf19.771	LPG20	0.554812	0.00294981	0.372183	0.107373	0.0911677	0.733184	-0.182629	0.461996	-0.463644	0.0136859	-0.281015	0.183899
C4_01130C	orf19.4677	orf19.4677	0.354155	0.0146253	0.122819	0.595	0.0917043	0.640244	-0.231336	0.165987	-0.262451	0.0768968	-0.0311149	0.882966
C5_01920C	orf19.3180	orf19.3180	-0.314199	0.000316437	0.00837436	0.960066	0.0921454	0.39789	0.322574	0.000326775	0.406345	1.49998e-06	0.083771	0.440991
CR_06060W	orf19.3858	orf19.3858	0.281562	0.007949	0.106459	0.501527	0.0922197	0.495879	-0.175103	0.149621	-0.189343	0.0859275	-0.0142397	0.928095
C4_05330C	orf19.1791	orf19.1791	0.509671	1.44773e-05	0.661071	1.27657e-07	0.0923322	0.571887	0.1514	0.303389	-0.417339	0.000400266	-0.568739	1.73602e-06
C4_03200C	orf19.2670	orf19.2670	-0.43698	0.00146673	-0.0205221	0.940872	0.0923649	0.610602	0.416458	0.00379331	0.529345	6.90476e-05	0.112887	0.509547
C4_06810C	orf19.3128	orf19.3128	-0.282992	9.67444e-06	-0.126113	0.127007	0.0926093	0.227631	0.156879	0.0283457	0.375601	1.56311e-09	0.218722	0.00102143
CR_07000C	orf19.2365	POL2	0.354926	6.41343e-07	-0.0139709	0.92322	0.0929541	0.299435	-0.368897	3.53852e-07	-0.261972	0.000292208	0.106925	0.212405
C1_09370W	orf19.4799	CEF1	0.421574	4.93927e-08	0.203972	0.0361073	0.0930052	0.357727	-0.217603	0.0108521	-0.328569	2.44427e-05	-0.110967	0.245497
C2_03560C	orf19.863	orf19.863	0.39455	8.19466e-08	0.097503	0.37276	0.0931528	0.319044	-0.297047	0.000111048	-0.301397	5.03468e-05	-0.00435018	0.968297
C1_11140W	orf19.2302	orf19.2302	-0.333422	0.000538576	-0.170221	0.18305	0.0932653	0.442492	0.163201	0.158924	0.426688	4.61889e-06	0.263486	0.00964627
C6_03450C	orf19.5705	NAM2	0.372962	4.01362e-07	-0.0428222	0.752428	0.0933756	0.317543	-0.415784	2.5201e-08	-0.279586	0.000173509	0.136198	0.115114
CR_07600W	orf19.6291	FUN30	0.188923	0.00415561	-0.00994532	0.940872	0.0945124	0.21767	-0.198869	0.00342133	-0.094411	0.187116	0.104458	0.161267
C5_02390C	orf19.4247	orf19.4247	-0.577799	1.09622e-15	-0.278425	0.000845728	0.094791	0.297151	0.299374	0.000136025	0.67259	3.99145e-21	0.373216	6.9838e-07
CR_07310W	orf19.6137	orf19.6137	1.19729	2.9165e-41	0.709151	3.44831e-13	0.0948025	0.452484	-0.488144	1.22329e-07	-1.10249	2.62006e-35	-0.614348	5.86653e-11
C5_01280C	orf19.1941	NUF2	0.353789	0.00121697	-0.180096	0.235648	0.0951292	0.507812	-0.533885	1.07965e-06	-0.25866	0.0207655	0.275225	0.0210747
C1_03460C	orf19.3048	orf19.3048	2.49219	1.54544e-51	-0.231302	0.398134	0.0953427	0.718953	-2.72349	5.71632e-58	-2.39684	6.02888e-48	0.326645	0.125411
C2_07030C	orf19.2259	orf19.2259	0.305063	2.51985e-05	0.0654775	0.572911	0.0955095	0.284413	-0.239586	0.0016458	-0.209554	0.00476814	0.030032	0.768006
C1_03730C	orf19.1036	MNS1	-0.343981	2.4232e-06	-0.319481	5.90988e-05	0.0962183	0.283287	0.0244998	0.856102	0.440199	6.44757e-10	0.415699	1.21937e-08
C1_04620W	orf19.6855	orf19.6855	-1.40501	5.61025e-89	0.0209169	0.881379	0.0963143	0.285886	1.42593	6.70193e-91	1.50132	1.55258e-101	0.0753974	0.411369
C1_11180C	snR64	snR64	-1.91862	0.456229	0.124529	NA	-3.3974	NA	2.04315	0.463384	-1.47878	0.612283	-3.52193	0.142045
CR_08200C	orf19.6382	orf19.6382	0.267903	8.43461e-05	0.182318	0.0263904	0.0965876	0.244003	-0.0855856	0.329836	-0.171316	0.0152486	-0.08573	0.299572
C3_00720W	orf19.5383	PMA1	0.713668	8.7019e-19	0.414449	3.46509e-06	0.0966152	0.365675	-0.299218	0.000582778	-0.617052	2.40353e-14	-0.317834	0.000221827
C1_08580C	orf19.405	VCX1	-0.626038	6.79145e-18	-0.487795	5.97331e-10	0.0976476	0.288236	0.138243	0.128559	0.723685	9.07524e-24	0.585442	2.65203e-15
C1_08040W	orf19.5076.1	orf19.5076.1	-0.699821	0.000689528	-0.0951244	0.799094	0.0978202	0.733254	0.604696	0.00611657	0.797641	7.13084e-05	0.192945	0.445421
C2_09530W	orf19.1401	EAP1	-0.384553	0.000884568	0.757328	2.27752e-11	0.0978809	0.510116	1.14188	5.48519e-27	0.482434	1.62973e-05	-0.659447	1.20324e-09
C3_02570W	orf19.246	orf19.246	-0.577948	5.68879e-06	0.0661795	0.773535	0.09912	0.556537	0.644127	6.16389e-07	0.677068	5.60283e-08	0.0329406	0.857588
C2_10320C	orf19.1746	orf19.1746	-0.691027	3.32779e-06	-0.166282	0.459317	0.0997218	0.617577	0.524745	0.00107586	0.790749	5.66264e-08	0.266004	0.116267
CR_04340W	orf19.522	PIM1	0.442198	1.15736e-09	-0.0271089	0.849851	0.0998865	0.276772	-0.469307	1.63887e-10	-0.342311	2.98196e-06	0.126995	0.142113
C1_11580W	orf19.1162	orf19.1162	-0.750508	4.04549e-20	0.082507	0.52902	0.100148	0.33507	0.833015	4.54592e-24	0.850656	8.40952e-26	0.0176407	0.88823
C4_04280C	orf19.1420	orf19.1420	-0.384002	0.0399038	-0.224521	0.380343	0.100722	0.676041	0.159482	0.53163	0.484724	0.00623503	0.325243	0.101442
C1_12560C	orf19.3760	DLH1	1.81392	3.90959e-05	0.3786	NA	0.101091	0.89884	-1.43532	0.00176162	-1.71283	8.30198e-05	-0.277509	0.665512
C5_02280C	orf19.4234	orf19.4234	0.394583	0.000119136	0.285848	0.0203585	0.101156	0.452484	-0.108736	0.430607	-0.293428	0.00485196	-0.184692	0.11661
C5_04070C	orf19.1282	CKS1	-0.1863	0.00979903	-0.0220165	0.86867	0.102815	0.20874	0.164283	0.0332464	0.289114	2.06784e-05	0.124831	0.11139
CR_04580W	orf19.549	orf19.549	0.275261	4.95287e-05	-0.0400025	0.739951	0.103206	0.202581	-0.315263	4.05741e-06	-0.172055	0.0146289	0.143208	0.0576574
C1_06070W	orf19.2438	orf19.2438	0.213976	0.0134356	-0.123316	0.294983	0.103461	0.310876	-0.337292	6.90722e-05	-0.110514	0.238956	0.226777	0.0106206
C2_06310C	orf19.5493	GSP1	-0.182765	0.00448808	-0.0570484	0.56078	0.104073	0.15015	0.125716	0.0775054	0.286838	2.50858e-06	0.161121	0.0145458
C1_06440C	orf19.6266	orf19.6266	0.266567	0.00269947	-0.0961167	0.475938	0.105047	0.334322	-0.362684	5.067e-05	-0.16152	0.083773	0.201164	0.0385559
C2_04980C	orf19.3530	CKA2	0.212071	0.0355957	0.187145	0.125421	0.105284	0.379648	-0.0249264	0.886997	-0.106787	0.330693	-0.0818609	0.498412
CR_04560C	orf19.547	orf19.547	0.346753	7.06085e-08	0.145352	0.0797817	0.106344	0.173801	-0.2014	0.00385637	-0.240409	0.000241203	-0.0390086	0.660397
CR_05030W	orf19.649	orf19.649	-0.347132	7.54663e-07	-0.231015	0.0044235	0.106433	0.206163	0.116117	0.180091	0.453565	3.49793e-11	0.337448	2.25443e-06
C2_03180C	orf19.5776	TOM1	0.212392	0.000445825	0.00998996	0.934994	0.106579	0.122322	-0.202402	0.0011602	-0.105813	0.105387	0.0965889	0.16096
C1_05910W	orf19.2458	SIP5	-0.325369	0.000350229	-0.240198	0.0257667	0.108204	0.329585	0.0851704	0.507973	0.433573	8.36969e-07	0.348403	0.000150508
C4_00310C	orf19.5658	MNN10	0.177018	0.0347452	-0.0535448	0.699146	0.10902	0.251944	-0.230562	0.00622301	-0.0679971	0.47343	0.162565	0.0652023
C2_07480W	orf19.1881	LPT1	-0.203736	0.0178157	-0.117342	0.305702	0.109908	0.262843	0.0863942	0.435613	0.313644	0.000101779	0.22725	0.00811644
C5_01350W	orf19.1933	orf19.1933	-0.321665	0.00055912	-0.171801	0.156573	0.110499	0.328516	0.149864	0.184315	0.432164	1.513e-06	0.282299	0.00360696
C4_00620C	orf19.4181	SPC2	-0.673598	3.18239e-16	-0.305699	0.00144451	0.112566	0.274574	0.367899	3.61514e-05	0.786165	5.60862e-22	0.418265	1.14788e-06
C1_08640W	orf19.4722	RTG1	0.398869	0.00445219	0.196145	0.331635	0.113069	0.542876	-0.202725	0.227749	-0.2858	0.0461751	-0.0830756	0.65816
C4_06030W	orf19.4413	CMD1	-0.500034	6.03104e-18	-0.121336	0.112638	0.113707	0.0980577	0.378697	1.69487e-10	0.61374	9.92401e-27	0.235043	0.000123071
C2_04870C	orf19.4123	orf19.4123	0.248632	0.00033884	-0.0143482	0.91436	0.113827	0.156807	-0.26298	0.000186713	-0.134805	0.0684468	0.128175	0.0969122
C4_05820W	orf19.1267.1	orf19.1267.1	0.468649	8.49586e-07	-0.017571	0.93094	0.114181	0.35421	-0.48622	6.51429e-07	-0.354468	0.000225515	0.131752	0.267211
C6_02930W	orf19.5569	orf19.5569	0.242219	8.71261e-05	0.0573995	0.560577	0.11523	0.10345	-0.184819	0.00486656	-0.126989	0.0534033	0.0578305	0.459913
C4_00690C	orf19.4173	orf19.4173	0.367518	0.00080945	0.565101	8.21612e-07	0.115553	0.410287	0.197583	0.110712	-0.251965	0.0256155	-0.449548	4.03406e-05
C1_07410C	orf19.4427	SKP1	-0.421722	1.52347e-09	-0.138963	0.129837	0.115613	0.166547	0.282759	0.000122582	0.537335	4.47618e-15	0.254576	0.000520367
C5_02850W	snR10c	snR10c	0.719246	2.13308e-14	-0.211275	0.0918692	0.117557	0.340393	-0.930521	7.25633e-23	-0.60169	1.87313e-10	0.328832	0.00148349
CR_07750C	orf19.3704	DBP6	0.482657	3.43945e-11	0.295775	0.000378985	0.117724	0.191456	-0.186882	0.0233305	-0.364933	6.97304e-07	-0.178051	0.0303523
C7_00700W	orf19.7049	CYB5	-0.44971	0.0145644	-0.0330906	0.92336	0.117728	0.619373	0.41662	0.0330741	0.567439	0.0012687	0.150819	0.495471
C6_04600W	orf19.2157	DAC1	-0.594894	5.24516e-13	0.123334	0.298287	0.118063	0.242432	0.718227	3.6191e-18	0.712957	1.60052e-18	-0.00527083	0.965108
C4_04880W	orf19.3791	FGR10	0.328166	0.0363508	0.0928841	0.727455	0.119024	0.55085	-0.235282	0.188657	-0.209142	0.201125	0.0261402	0.907905
C4_03780C	orf19.1300	orf19.1300	0.319608	0.00322323	0.0660765	0.727455	0.120078	0.373007	-0.253531	0.0313493	-0.199529	0.0787688	0.054002	0.713095
C2_04140W	orf19.807	CHS5	-0.396246	2.57614e-12	-0.144324	0.041196	0.121078	0.0635631	0.251922	2.37396e-05	0.517325	1.57816e-20	0.265403	6.13412e-06
C1_03520W	orf19.3054	RPN3	0.167647	0.016085	-0.0792894	0.418545	0.12111	0.109984	-0.246936	0.000293153	-0.0465364	0.574659	0.2004	0.00393619
C2_09690C	orf19.1383	orf19.1383	-0.343336	8.30039e-05	-0.104702	0.416986	0.121503	0.242492	0.238634	0.012337	0.464839	3.53616e-08	0.226205	0.0152655
CR_09290W	orf19.7324	THI13	-1.44392	0.00203252	-0.10709	NA	0.122209	0.84932	1.33683	0.00730717	1.56613	0.000595379	0.2293	0.686886
CR_07910C	orf19.607	orf19.607	-0.294314	0.00410862	-0.114704	0.440615	0.122931	0.31158	0.17961	0.128299	0.417245	1.94984e-05	0.237635	0.0273308
C5_05190W	orf19.4012	PCL5	0.496011	0.0228794	0.540717	0.0312893	0.123046	0.682519	0.0447059	0.9089	-0.372966	0.0925084	-0.417672	0.0714716
C5_03090W	orf19.4339	VPS4	0.297287	0.000241934	-0.093439	0.447043	0.123531	0.199536	-0.390726	1.57446e-06	-0.173756	0.041035	0.21697	0.0128427
C4_00650W	orf19.4177	HIS5	0.599444	5.23736e-08	0.582449	1.57241e-06	0.124592	0.400625	-0.0169952	0.94122	-0.474852	1.69031e-05	-0.457857	7.78485e-05
C3_02270W	orf19.1618.1	orf19.1618.1	-0.514882	2.55392e-06	-0.0700473	0.719261	0.125247	0.35619	0.444835	0.00011678	0.640129	1.89146e-09	0.195294	0.119541
C3_05400C	orf19.6978	orf19.6978	-1.8466	0.390076	0.598277	NA	-1.54723	NA	2.44488	0.246129	0.29937	0.9209	-2.14551	0.291379
C1_05270C	orf19.439	orf19.439	0.443524	1.22561e-08	0.188363	0.0586159	0.126266	0.186799	-0.25516	0.00238191	-0.317258	5.76878e-05	-0.0620972	0.554484
C1_08920W	orf19.4751	orf19.4751	0.286187	0.00052546	-0.0312254	0.84334	0.126858	0.193878	-0.317413	0.000175957	-0.15933	0.0683489	0.158083	0.0915308
CR_02540W	orf19.169	CHO2	0.391304	3.69515e-08	-0.159628	0.0834619	0.127186	0.134169	-0.550932	7.63085e-15	-0.264118	0.000270957	0.286815	0.000133781
C1_12260W	orf19.5237	VPH2	-0.59484	2.99915e-06	-0.0917962	0.673234	0.127246	0.428551	0.503044	0.000182912	0.722086	6.05756e-09	0.219042	0.13408
C4_06600W	orf19.2873	TOP2	0.388895	2.80898e-07	-0.206563	0.0286633	0.127389	0.162509	-0.595458	3.03574e-15	-0.261506	0.0007171	0.333952	2.77157e-05
C5_05390C	orf19.4035	PGA4	-0.59439	7.57547e-11	0.0412505	0.81136	0.127418	0.26068	0.63564	4.21369e-12	0.721808	1.05981e-15	0.086168	0.464198
C1_12580W	orf19.3758	orf19.3758	0.219884	0.0218162	-0.0547317	0.738444	0.128682	0.24207	-0.274616	0.00483845	-0.091202	0.396522	0.183414	0.0752408
C1_04520C	orf19.6846	PHO85	-0.186578	0.0178537	-0.203579	0.0215896	0.129067	0.133214	-0.0170004	0.906137	0.315645	1.68983e-05	0.332646	9.32021e-06
C4_00030C	orf19.366	orf19.366	-0.63806	1.78415e-22	-0.141026	0.104983	0.129124	0.0919813	0.497034	2.50767e-13	0.767184	2.03869e-32	0.270149	0.000103941
C1_07000W	orf19.6208	MEF2	0.350405	8.99844e-06	0.0557491	0.693271	0.129988	0.170968	-0.294656	0.000373426	-0.220417	0.00674148	0.0742391	0.47166
CR_09600C	orf19.6601.1	YKE2	-2.00942	2.08158e-10	-0.151121	0.776946	0.130084	0.761289	1.8583	1.19046e-08	2.1395	7.82554e-12	0.281205	0.447069
C6_01560W	orf19.3430	orf19.3430	0.736115	7.82505e-09	-0.0103319	0.969278	0.130116	0.455557	-0.746446	1.27564e-08	-0.605999	2.05311e-06	0.140448	0.409376
C6_03920W	orf19.5768	SNF4	-0.168529	0.00847694	-0.154469	0.0381688	0.130448	0.0555164	0.0140597	0.906137	0.298977	5.76119e-07	0.284917	4.1757e-06
C1_02750C	orf19.2964	RSC2	0.238122	0.0139871	-0.000508191	0.997005	0.130765	0.239927	-0.238631	0.0178942	-0.107357	0.31739	0.131274	0.228965
C1_09970C	orf19.4863	PDC2	0.395741	5.78213e-06	0.203532	0.0656864	0.130974	0.220078	-0.192209	0.0530893	-0.264767	0.0030453	-0.0725581	0.527292
C1_07110W	orf19.6193	TAF145	-0.157115	0.046575	0.00375686	0.978576	0.131031	0.116805	0.160872	0.0502086	0.288146	6.43883e-05	0.127274	0.124169
C1_05640C	orf19.2488	FAL1	0.279276	0.0089498	0.283773	0.021774	0.131557	0.303875	0.0044976	0.984973	-0.147719	0.198344	-0.152216	0.209985
CR_03130W	orf19.2412	orf19.2412	-0.292788	0.00239973	-0.175836	0.158807	0.132805	0.234846	0.116952	0.348625	0.425594	3.50923e-06	0.308642	0.00176119
C2_00490W	orf19.2078	orf19.2078	-0.202574	0.0228291	0.0550101	0.706394	0.133318	0.174025	0.257584	0.00392139	0.335892	4.79777e-05	0.0783081	0.459501
C1_06790C	orf19.6231	MRPL19	0.170555	0.0453775	0.0288381	0.84837	0.133521	0.147846	-0.141717	0.127641	-0.0370344	0.721377	0.104683	0.267892
C1_02640C	orf19.2953	TOM20	0.246767	0.000276712	0.0649261	0.539717	0.135777	0.0736235	-0.181841	0.012456	-0.11099	0.135279	0.0708512	0.396187
CR_06050W	orf19.3856	CDC28	-0.324725	0.00150437	-0.293662	0.013523	0.136035	0.258298	0.0310623	0.867628	0.46076	2.48391e-06	0.429698	2.70032e-05
C2_06200C	orf19.5483	orf19.5483	0.352717	7.33742e-05	0.152003	0.212502	0.136053	0.202841	-0.200714	0.0440375	-0.216664	0.0190536	-0.0159496	0.904976
C1_06210W	orf19.1828	BUD16	0.471513	2.32472e-05	0.0293877	0.895621	0.136158	0.340067	-0.442126	0.000145852	-0.335355	0.00306035	0.106771	0.467408
C2_00190C	orf19.2113	orf19.2113	0.214486	0.0126094	0.118468	0.303973	0.137233	0.151761	-0.0960184	0.371405	-0.0772535	0.432211	0.0187649	0.876293
C2_09650W	orf19.1389	orf19.1389	-0.514798	6.79133e-26	-0.180594	0.00158084	0.137529	0.0126392	0.334205	3.52771e-11	0.652327	3.29809e-41	0.318122	2.68305e-10
C2_05040C	orf19.3535	orf19.3535	-0.413402	7.84071e-07	-0.123436	0.306972	0.138017	0.159404	0.289966	0.00135444	0.551419	1.17801e-11	0.261453	0.00340086
C2_09270C	orf19.4089	SGT1	-0.493158	2.59824e-14	-0.0358688	0.766496	0.138083	0.0644162	0.457289	3.90164e-12	0.63124	4.23491e-23	0.173951	0.0149109
CR_06020W	orf19.3851	orf19.3851	-0.363636	0.00191271	-0.0487207	0.819325	0.138322	0.321601	0.314916	0.0120775	0.501959	7.25647e-06	0.187043	0.155803
C2_03530W	orf19.867	orf19.867	-0.556251	9.99976e-15	-0.258144	0.00209624	0.139775	0.0971044	0.298107	0.000121956	0.696026	8.79494e-23	0.397919	8.14769e-08
CR_01570W	orf19.2544	orf19.2544	0.324949	0.00796508	0.123576	0.501527	0.140971	0.341355	-0.201373	0.152105	-0.183978	0.15789	0.017395	0.923616
C4_02480C	orf19.2754	TIM13	0.362821	0.012471	0.153744	0.474154	0.142409	0.428881	-0.209077	0.220057	-0.220411	0.149188	-0.0113346	0.955742
C2_08730W	orf19.3603	MFG1	0.25229	0.0289145	-0.0045996	0.981682	0.14323	0.283287	-0.25689	0.0344139	-0.10906	0.396729	0.14783	0.260898
C1_03650C	orf19.3064	MRPL27	0.249734	0.000179748	0.0934623	0.334214	0.144339	0.052881	-0.156272	0.0350583	-0.105396	0.150802	0.0508765	0.561759
C5_02120C	orf19.4219	RIX7	0.468237	1.65075e-09	0.358792	3.75036e-05	0.144731	0.122668	-0.109445	0.271838	-0.323507	3.91678e-05	-0.214061	0.0127649
C2_02870W	orf19.5817	orf19.5817	-0.342238	8.12106e-06	-0.0726561	0.555673	0.144856	0.0964996	0.269582	0.000935035	0.487094	4.89955e-11	0.217512	0.00784488
C4_07080C	orf19.3100	orf19.3100	0.540201	3.04683e-14	-0.16741	0.0805282	0.14501	0.0902073	-0.707611	1.01568e-22	-0.395191	3.55121e-08	0.31242	5.75876e-05
C5_02330W	orf19.4241	orf19.4241	-0.864406	0.0181657	-0.0184844	0.977682	0.145366	0.768822	0.845921	0.0280913	1.00977	0.00412226	0.16385	0.723383
C6_03010W	orf19.5580	TEL1	-0.56463	4.24152e-25	0.0259652	0.805301	0.145802	0.0175378	0.590595	8.39583e-27	0.710432	1.52103e-39	0.119837	0.0564474
C6_01770W	orf19.3407	RAD18	0.426729	0.000161545	0.326852	0.0166506	0.145844	0.306474	-0.0998768	0.53287	-0.280885	0.0155604	-0.181009	0.175429
C5_03930C	orf19.3219	orf19.3219	-1.26716	2.36811e-102	0.307392	1.64236e-06	0.146438	0.0280569	1.57455	2.34436e-157	1.4136	8.05173e-128	-0.160954	0.0126116
C1_11260C	orf19.675.1	orf19.675.1	-1.82695	NA	0.705288	NA	-1.50634	NA	2.53224	0.442917	0.320605	0.936795	-2.21163	NA
C2_09810C	orf19.1369	orf19.1369	-1.05875	1.74329e-23	-0.183468	0.212917	0.146786	0.258041	0.875281	1.40037e-15	1.20553	1.78027e-30	0.330254	0.00375407
C1_07870C	orf19.5058	SMI1	-0.17019	0.0193674	0.151917	0.0711579	0.146976	0.0535761	0.322107	2.66314e-06	0.317165	2.46917e-06	-0.00494147	0.959672
C2_04770W	orf19.190	orf19.190	0.237685	0.0412749	-0.338361	0.0101588	0.148507	0.261772	-0.576046	2.18185e-07	-0.0891782	0.497622	0.486868	1.8923e-05
CR_05920C	orf19.6621	MHP1	-0.814769	1.33251e-33	-0.0344259	0.790014	0.148558	0.0562326	0.780343	4.31666e-30	0.963326	5.83842e-47	0.182984	0.014609
C6_00490W	orf19.4210	orf19.4210	-0.521184	6.98775e-09	-0.385184	0.0001604	0.148732	0.161627	0.135999	0.251695	0.669915	2.62887e-14	0.533916	7.3756e-09
CR_06490C	orf19.717	HSP60	0.18997	0.00508991	-0.0412407	0.716574	0.149093	0.0380434	-0.231211	0.000611284	-0.0408774	0.624392	0.190334	0.00524294
C4_05660C	orf19.1251	BRN1	0.394641	2.10636e-06	0.00463184	0.977682	0.149152	0.130209	-0.390009	4.91042e-06	-0.245489	0.00419667	0.14452	0.141104
C2_07800W	orf19.2201	orf19.2201	0.527756	0.00010358	0.0493279	0.853321	0.149404	0.399403	-0.478429	0.000834857	-0.378352	0.00613799	0.100077	0.590474
C1_03930W	orf19.4467	NUE2	0.399133	8.23119e-05	0.155338	0.284058	0.149876	0.223579	-0.243795	0.030152	-0.249256	0.0174504	-0.00546188	0.971197
C1_11930W	orf19.5274	orf19.5274	0.729057	4.83135e-16	-0.119907	0.393343	0.150127	0.181639	-0.848964	9.42426e-21	-0.57893	1.38354e-10	0.270034	0.00788217
C1_08490W	orf19.394	orf19.394	0.212817	0.0102005	0.17346	0.0805282	0.150223	0.0974171	-0.0393571	0.7626	-0.0625942	0.522316	-0.0232371	0.837698
C6_03170C	orf19.5604	MDR1	-0.746298	0.00738915	1.11631	3.69924e-05	0.150644	0.68126	1.86261	1.22951e-13	0.896942	0.000814775	-0.965666	0.000158239
C2_03030W	orf19.5798	LIG4	-0.428331	0.00253688	0.0898565	0.705563	0.150916	0.381633	0.518187	0.000258438	0.579247	2.03469e-05	0.0610593	0.74561
C2_02880C	orf19.5816	EBP7	0.336661	0.0108588	-0.378724	0.0156986	0.151122	0.343825	-0.715385	3.60861e-08	-0.18554	0.188579	0.529845	8.73997e-05
C1_10890C	orf19.2328	orf19.2328	-0.332765	2.40455e-09	-0.178293	0.00727121	0.151746	0.012987	0.154472	0.0141048	0.484511	4.49328e-19	0.330039	5.94228e-09
C1_08700W	orf19.4728	orf19.4728	0.175496	0.0172209	0.219098	0.00624583	0.151935	0.0504366	0.0436023	0.686653	-0.0235609	0.803954	-0.0671632	0.443507
C5_00450C	orf19.944	IFG3	3.38721	0.00275138	1.20837	NA	0.15205	0.940216	-2.17884	0.0742175	-3.23516	0.00378554	-1.05632	0.449539
CR_06000W	orf19.451	SOK1	0.266744	0.00108645	0.213547	0.0266709	0.152146	0.0980577	-0.0531975	0.665187	-0.114598	0.20371	-0.0614006	0.55706
C1_09800C	orf19.4845	TVP18	-0.387137	1.42108e-06	-0.237592	0.012467	0.152371	0.0976822	0.149545	0.119839	0.539509	4.68857e-12	0.389964	1.60727e-06
C1_04610W	orf19.6854	ATP1	0.349696	1.04632e-06	-0.0865162	0.413302	0.152521	0.0590326	-0.436213	7.38453e-10	-0.197176	0.00853554	0.239037	0.00133315
CR_01700C	orf19.2563	orf19.2563	0.391996	1.0514e-07	0.198215	0.0312893	0.152545	0.0769471	-0.193781	0.0185558	-0.23945	0.00154782	-0.0456694	0.654932
C2_08810C	orf19.3590	IPP1	-0.320638	0.000115481	0.059324	0.668795	0.152581	0.105741	0.379962	4.48347e-06	0.473219	3.59359e-09	0.0932572	0.352458
CR_06960W	orf19.2369	orf19.2369	0.299914	0.000395602	-0.088438	0.506215	0.152586	0.118302	-0.388352	6.05577e-06	-0.147328	0.105739	0.241024	0.00826207
C6_02970C	orf19.5575	orf19.5575	0.370489	7.3617e-05	-0.286116	0.0135453	0.152975	0.170968	-0.656605	3.26473e-12	-0.217514	0.0254719	0.439091	9.36417e-06
C4_05610C	orf19.1246	orf19.1246	-0.949821	1.54139e-39	-0.0441791	0.739951	0.153383	0.0713794	0.905642	1.35892e-35	1.1032	3.49176e-53	0.197562	0.014246
C3_02510C	orf19.242	SAP8	0.390419	0.0156927	0.0460175	0.880134	0.153767	0.448509	-0.344402	0.0495731	-0.236652	0.162561	0.10775	0.610099
CR_07240C	orf19.6146	CLG1	0.198184	0.0117943	0.886724	1.22447e-34	0.155719	0.0635144	0.688541	1.89586e-22	-0.0424646	0.660971	-0.731005	7.94884e-25
C1_03500W	orf19.3052	YPT1	-0.473846	1.46584e-12	-0.114313	0.221249	0.155837	0.040642	0.359533	1.99444e-07	0.629683	1.11172e-21	0.27015	0.000117026
C1_14590C	orf19.7276.1	TLO4	-0.824141	0.0193674	-0.152956	0.801824	0.156219	0.735161	0.671185	0.0895448	0.98036	0.00362686	0.309175	0.451759
CR_07460C	orf19.6119	orf19.6119	0.404654	1.47636e-10	0.653144	2.30268e-24	0.156508	0.0297744	0.248491	0.000162711	-0.248146	0.000124615	-0.496637	2.99553e-15
C1_10650W	orf19.1836	APN2	0.453908	7.15377e-06	0.0079993	0.969278	0.156678	0.205676	-0.445909	2.08017e-05	-0.29723	0.0040595	0.148679	0.231844
C6_00190W	orf19.1177	orf19.1177	-0.231141	0.00818004	-0.0304592	0.84837	0.15681	0.0988018	0.200682	0.0315242	0.387951	2.1809e-06	0.187269	0.0406458
C4_05280W	orf19.2629	USO1	-0.229689	0.000599788	-0.245346	0.000843304	0.157366	0.0283623	-0.0156569	0.902154	0.387055	1.14989e-09	0.402712	6.86161e-10
C5_02720W	orf19.4292	PEP12	-0.511353	3.2853e-07	0.029792	0.876909	0.157413	0.182331	0.541145	1.11034e-07	0.668766	6.77014e-12	0.127621	0.291217
C5_04080C	orf19.1281	orf19.1281	0.280705	0.0349706	0.222506	0.185266	0.157432	0.309406	-0.0581997	0.778495	-0.123273	0.403313	-0.0650736	0.702563
C1_08780W	orf19.4736	orf19.4736	-0.208923	0.0421752	-0.0238112	0.896914	0.157587	0.153983	0.185112	0.0964153	0.36651	9.8791e-05	0.181398	0.0906062
C3_02230C	orf19.1622	YCG1	0.395725	5.61695e-05	-0.190714	0.141837	0.157776	0.175754	-0.586439	1.9085e-09	-0.237948	0.0201055	0.348491	0.000730689
CR_05510W	orf19.5851	STE13	-0.335703	0.0422348	-0.314134	0.12022	0.157872	0.411851	0.0215685	0.948909	0.493575	0.00128402	0.472007	0.00420094
CR_02190C	orf19.3753	SEF1	0.468614	5.42678e-13	0.170652	0.0361073	0.157935	0.0339736	-0.297962	1.15961e-05	-0.310679	2.5934e-06	-0.0127174	0.89929
C4_04780W	orf19.3802	PMT6	-0.219109	0.00417138	-0.128396	0.193027	0.158374	0.0532061	0.0907133	0.346862	0.377483	1.56652e-07	0.286769	0.000133205
C6_02420W	orf19.3483	orf19.3483	-0.392719	0.00189858	-0.128959	0.502126	0.15859	0.283951	0.263761	0.0684616	0.551309	4.55214e-06	0.287549	0.0340066
CR_07520C	orf19.2622	YPT31	0.238966	0.000591768	0.333245	4.46839e-06	0.158688	0.0360556	0.0942791	0.270139	-0.0802786	0.315066	-0.174558	0.017071
C6_02810C	orf19.5555	orf19.5555	-0.291565	0.000332772	0.052357	0.706711	0.158746	0.0780289	0.343922	2.56044e-05	0.450311	6.73318e-09	0.106389	0.2646
CR_04380C	orf19.528	SEC26	-0.427648	1.50763e-08	-0.231648	0.00984292	0.159064	0.0639849	0.196	0.0217031	0.586712	1.86101e-15	0.390713	3.70494e-07
C3_03480C	orf19.346	ALT1	-0.26333	0.00044675	-0.0906446	0.408459	0.159107	0.0515492	0.172685	0.0393924	0.422436	3.19738e-09	0.249751	0.00120372
C2_01940C	orf19.1506	orf19.1506	-1.78888	0.451803	2.68399	NA	2.03538	NA	4.47287	0.0133258	3.82426	0.0321135	-0.64861	0.679499
CR_02040W	orf19.2605	PRK1	-0.313138	1.11035e-06	-0.147343	0.0671698	0.160471	0.0227487	0.165795	0.0209795	0.473609	2.81303e-14	0.307814	2.29991e-06
C1_12010C	orf19.5265	KIP4	-2.58152	1.20887e-26	0.115019	0.751265	0.160565	0.55085	2.69654	1.78457e-28	2.74209	3.01454e-30	0.045546	0.879824
C3_00840C	orf19.6156	orf19.6156	0.368403	0.000241814	0.19813	0.131054	0.161185	0.176703	-0.170272	0.15234	-0.207217	0.0494719	-0.036945	0.796928
C2_00230W	orf19.2110	orf19.2110	-0.289643	0.00307474	-0.0156416	0.936973	0.161231	0.141397	0.274002	0.0075327	0.450875	1.12491e-06	0.176873	0.0976235
C3_01210C	orf19.1730	orf19.1730	-0.350985	3.41478e-06	-0.0520637	0.693271	0.16137	0.0557224	0.298921	0.000150669	0.512355	2.39454e-12	0.213434	0.00804197
C4_05150W	orf19.745	VAC8	-0.842487	3.13663e-06	-0.0932932	0.774012	0.162034	0.481892	0.749194	7.41508e-05	1.00452	1.21494e-08	0.255327	0.224537
C2_05780C	orf19.6889	MKK2	-1.78738	3.85166e-131	0.171197	0.0634807	0.162584	0.0513302	1.95858	2.51928e-156	1.94997	1.50623e-156	-0.00861264	0.939455
CR_02930W	orf19.2850	orf19.2850	0.349134	1.19712e-08	-0.023778	0.843613	0.162971	0.0172542	-0.372912	1.91847e-09	-0.186162	0.00353983	0.186749	0.0052374
C1_10510W	orf19.994	orf19.994	-0.812634	4.54611e-14	-0.289418	0.0308015	0.16312	0.202526	0.523216	7.34642e-06	0.975754	3.09426e-20	0.452538	6.13234e-05
C6_02290C	orf19.3470	orf19.3470	0.660008	2.47871e-12	0.339109	0.00229021	0.164247	0.157845	-0.320899	0.00161327	-0.495761	1.7442e-07	-0.174863	0.118681
C2_09740W	orf19.1376	SSO2	-0.449433	3.85079e-12	0.049152	0.660609	0.164358	0.0234753	0.498585	1.42117e-14	0.613791	4.64329e-22	0.115206	0.128544
CR_07360W	orf19.6133	PIF1	0.521924	3.95025e-15	0.68608	5.91843e-24	0.164668	0.0313384	0.164157	0.0301376	-0.357256	1.12718e-07	-0.521412	6.58851e-15
C5_04530W	orf19.3938	orf19.3938	0.510843	7.62347e-13	0.237841	0.00548947	0.165586	0.0459871	-0.273002	0.000334877	-0.345257	1.79156e-06	-0.0722544	0.441544
C2_08110W	orf19.2174	RAD57	-0.412978	8.52765e-05	-0.00605179	0.975917	0.165784	0.171798	0.406927	0.000188161	0.578762	1.02486e-08	0.171835	0.15255
C3_01020W	orf19.2506	orf19.2506	-0.913232	2.92844e-22	-0.0569994	0.739768	0.166712	0.134544	0.856233	4.25705e-19	1.07994	4.3732e-31	0.223711	0.0337458
C1_04880C	orf19.755	MRPL37	0.393003	0.000760279	0.0800116	0.696187	0.16679	0.2345	-0.312991	0.0126297	-0.226213	0.0654802	0.0867781	0.571872
C4_00680W	orf19.4174	orf19.4174	-0.208362	0.0237296	-0.183496	0.101983	0.168023	0.0850251	0.0248657	0.879765	0.376385	8.8628e-06	0.35152	8.88824e-05
C1_11170W	orf19.2298	WBP1	-0.414028	1.65898e-06	-0.115589	0.360731	0.168505	0.086043	0.298439	0.00122924	0.582533	3.56573e-12	0.284093	0.00174035
C6_04560W	orf19.2150	orf19.2150	0.284827	8.45993e-06	0.042812	0.70028	0.169436	0.0146219	-0.242015	0.000246102	-0.115391	0.101128	0.126624	0.0761596
CR_07230W	orf19.6147	orf19.6147	0.533147	6.5787e-18	0.22847	0.00180062	0.169536	0.0166377	-0.304678	2.66314e-06	-0.363611	6.035e-09	-0.0589335	0.476415
CR_04190W	orf19.505	SRV2	-0.481455	2.01297e-13	-0.0552466	0.61621	0.169854	0.0207742	0.426209	1.55279e-10	0.651309	5.21442e-24	0.2251	0.00128339
C5_05030C	orf19.3995	RIM13	-0.425961	0.000435633	-0.0252981	0.913332	0.170783	0.227631	0.400663	0.00145079	0.596744	2.90087e-07	0.196081	0.151195
C5_03260C	orf19.2653	orf19.2653	-0.420868	1.75209e-07	-0.0515937	0.720864	0.171195	0.0572687	0.369274	1.16227e-05	0.592063	3.39495e-14	0.222789	0.0104986
C2_09850C	orf19.1366	orf19.1366	-1.78048	NA	-1.11694	NA	0.983112	NA	0.663537	0.879765	2.76359	0.255985	2.10006	NA
C5_03990W	orf19.3212	MID1	-0.438858	4.80039e-06	-0.151104	0.262958	0.171419	0.118212	0.287754	0.00642738	0.610277	4.61968e-11	0.322523	0.00135464
CR_07350W	orf19.6134	orf19.6134	0.270433	0.00118315	0.5014	2.69065e-09	0.171955	0.0606073	0.230967	0.00776255	-0.0984781	0.298	-0.329445	6.33396e-05
C1_05390C	orf19.426	orf19.426	-0.214967	0.0107228	-0.0593062	0.664819	0.172123	0.0527794	0.155661	0.0984019	0.38709	7.59504e-07	0.231429	0.00650805
C3_01160W	orf19.3153	MSS4	-1.07683	3.52908e-45	0.181288	0.0612901	0.17264	0.0482101	1.25812	6.80812e-61	1.24947	5.75384e-61	-0.00864817	0.94234
C2_04790C	orf19.185	orf19.185	0.187126	0.0230409	0.0289437	0.847203	0.173178	0.0448005	-0.158183	0.0775743	-0.0139486	0.904413	0.144234	0.103497
C1_10430W	orf19.984	PHO8	1.99438	3.46257e-23	0.0286733	0.951422	0.173372	0.576606	-1.9657	5.03929e-21	-1.821	4.69517e-20	0.144699	0.645572
C7_03220C	orf19.5133	ZCF29	0.56177	1.54899e-13	0.195566	0.0463053	0.173977	0.0516902	-0.366204	4.21653e-06	-0.387793	4.6659e-07	-0.0215883	0.851808
C1_08910C	orf19.4750	orf19.4750	0.313436	0.00531616	-0.16222	0.309907	0.174036	0.179313	-0.475657	2.37396e-05	-0.139401	0.260356	0.336256	0.00436391
C1_08950W	orf19.4753	PFK26	0.24332	0.0496961	0.157448	0.332394	0.174313	0.197841	-0.0858723	0.613757	-0.0690072	0.636503	0.016865	0.922595
C2_07390C	orf19.1893	orf19.1893	-0.368616	3.32502e-06	0.492267	1.54239e-09	0.175376	0.0460599	0.860883	3.62464e-30	0.543992	1.25949e-12	-0.316891	6.94917e-05
C2_07640W	orf19.1861	orf19.1861	-0.404279	8.09624e-07	0.0709964	0.594685	0.175638	0.0548648	0.475275	8.00604e-09	0.579917	2.72725e-13	0.104642	0.289847
C1_10440W	orf19.985	orf19.985	0.246594	0.00460922	0.110509	0.368371	0.176112	0.0625101	-0.136085	0.180554	-0.070482	0.491565	0.0656032	0.549911
CR_07640C	orf19.6286	orf19.6286	0.288751	0.00102234	-0.177884	0.113823	0.176164	0.0713794	-0.466635	7.78169e-08	-0.112587	0.2534	0.354048	7.5783e-05
C4_05030C	orf19.3775	SSK2	-0.230937	0.000239982	-0.0258449	0.823542	0.178066	0.00681991	0.205092	0.00185621	0.409003	7.06325e-12	0.203911	0.00164312
C4_00270W	orf19.5653	ATP2	0.509899	1.11116e-10	0.108171	0.351076	0.178483	0.0481618	-0.401727	7.18316e-07	-0.331416	4.17269e-05	0.0703115	0.493525
CR_06460W	orf19.720	GST3	-1.00942	0.000601602	-0.352769	0.398387	0.179356	0.633381	0.656651	0.0542256	1.18878	2.96273e-05	0.532125	0.0966956
C2_02500W	orf19.1574	orf19.1574	0.490229	1.55015e-06	0.0617654	0.745183	0.179711	0.144984	-0.428464	5.86547e-05	-0.310518	0.00295173	0.117946	0.369326
[truncated: 4,423 more rows]

## Sheet: 2
Total							UP							Down
589	42	483	566	639	557		157	25	168	417	430	200		432	17	315	149	209	357
efg1ΔΔ vs WT	RBT5-UME6 vs WT	efg1ΔΔRBT5-UME6 vs WT	RBT5-UME6 vs efg1ΔΔ	efg1ΔΔRBT5-UME6 vs efg1ΔΔ	efg1ΔΔRBT5-UME6 vs RBT5-UME6		efg1ΔΔ vs WT	RBT5-UME6 vs WT	efg1ΔΔRBT5-UME6 vs WT	RBT5-UME6 vs efg1ΔΔ	efg1ΔΔRBT5-UME6 vs efg1ΔΔ	efg1ΔΔRBT5-UME6 vs RBT5-UME6		efg1ΔΔ vs WT	RBT5-UME6 vs WT	efg1ΔΔRBT5-UME6 vs WT	RBT5-UME6 vs efg1ΔΔ	efg1ΔΔRBT5-UME6 vs efg1ΔΔ	efg1ΔΔRBT5-UME6 vs RBT5-UME6
SAP6-	SAP4-	SAP6-	SAP6+	SAP5+	SAP6-		KNS1	orf19.4921.1	orf19.1541	orf19.1765	CDC20	BNA32		HWP1	orf19.6192	SAP6	RBE1	orf19.1075	SAP6
SAP4-	PGA10+	SAP4-	SAP4+	RBT4+	SAP4-		orf19.4940	SAP2	SPT14	orf19.5620	GEF2	HMX1		ECE1	orf19.7576	SAP4	orf19.2366	RBE1	SAP4
tR(UCU)4-	RBR1-	tR(UCU)4-	tR(UCU)4+	IRF1-	tR(UCU)4-		MRPL8	orf19.3306	orf19.3586	PGA28	PTP1	ROT2		EFG1	RPS14B	SAP5	RHD3	orf19.5212	tR(UCU)4
DDR48-	snR189a+	DDR48-	DDR48+	orf19.4384.1-	DDR48-		RHB1	TYE7	orf19.3704.1	orf19.5210	orf19.7581	orf19.732		SAP6	CSA2	DDR48	YWP1	ASG7	DDR48
MNN1-	CHA1+	MNN1-	MNN1+	ECE1+	MNN1-		PTH2	orf19.699	orf19.4347	CRD2	FLC3	orf19.7604		SAP4	FDH1	RBT4	CSA2	snR189a	MNN1
SAP5-	ZRT101+	SAP5-	SAP5+	HYR1+	SAP5-		orf19.2778	MDR1	orf19.3898	AHR1	VAC8	orf19.1611		RBT4	GAP2	tR(UCU)4	PGA30	orf19.3621	SAP5
orf19.3337-	orf19.6718+	orf19.3337-	orf19.3337+	orf19.1075-	orf19.3337-		ENA2	orf19.1363	YPT7	PGI1	orf19.1359	orf19.6558		SAP5	orf19.3508	MNN1	orf19.1258	YWP1	orf19.3337
RBT4-	snR31a+	RBT4-	RBT4+	orf19.2585-	RBT4-		AQY1	PGA26	SFL1	orf19.5669	SEC6	KEX1		DDR48	SAP4	orf19.3337	orf19.2638.1	orf19.2585	RBT4
IRF1-	HAK1+	IRF1-	IRF1+	ADAEC-	IRF1-		SAP1	ASM3	DPP1	ATC1	orf19.6726	RPN12		CFL11	orf19.36.1	orf19.4384.1	orf19.5306	orf19.2943.5	IRF1
orf19.1691-	QDR1+	orf19.1691-	orf19.1691+	orf19.5212-	orf19.1691-		orf19.4818	QDR1	orf19.2274	orf19.4305.1	HRQ2	PRN1		RBR1	MSS51	IRF1	orf19.3621	tR(ACG)2	orf19.1691
orf19.4384.1-	orf19.36.1-	orf19.4384.1-	orf19.4384.1+	orf19.2943.5-	orf19.4384.1-		orf19.5573	ZRT101	orf19.3711	FAV3	orf19.4241	SAP1		DEF1	CWH8	orf19.1691	orf19.5933	FMA1	orf19.4384.1
ECE1-	TYE7+	ECE1-	ECE1+	orf19.3310-	ECE1-		orf19.7244	orf19.1368	CFL4	IDP2	orf19.3487	AXL2		orf19.344	PXP2	orf19.1075	DAG7	CWP419	ECE1
orf19.3375-	SCR1+	orf19.3375-	orf19.3375+	tR(ACG)2-	orf19.3375-		CPA2	LYS22	orf19.7368	KRE1	MP65	TUF1		FAV1	RBR1	PGA23	MET3	snR31a	orf19.3375
HYR1-	orf19.1368+	HYR1-	HYR1+	UCF1+	HYR1-		CRP1	snR8a	orf19.4883	orf19.1611	orf19.7144	EXG2		orf19.1691	ZCF4	RBR1	ADH3	orf19.1968	HYR1
orf19.11-	ASM3+	orf19.1075-	orf19.11+	RBR1+	orf19.1075-		SFL1	orf19.510	orf19.1582	FBA1	orf19.4574	orf19.5932		UCF1	ACB1	ECE1	PIR1	PHO113	orf19.1075
ADAEC-	snR8a+	orf19.2585-	ADAEC+	PHO113-	orf19.2585-		MCM2	snR3a	orf19.6170	HGT7	orf19.5495	RHD1		HYR1	MDH1	ADAEC	orf19.936	tY(GUA)1	orf19.2585
PGA10-	snR3a+	orf19.11-	orf19.693+	snR189a-	orf19.11-		ITS2	orf19.5069	PRX1	orf19.6245	DCK2	orf19.676		ALS3	FRP6	orf19.3310	orf19.3897	tT(AGU)4	orf19.11
orf19.5212+	orf19.4921.1+	ADAEC-	PGA10+	CHA1-	ADAEC-		orf19.6493	snR31a	SYG1	SNG4	APM1	FGR34		IHD1		HYR1	orf19.1651	orf19.2539	ADAEC
PGA23-	LYS22+	PGA10-	PGA23+	ASR1-	orf19.693-		orf19.750	SCR1	orf19.557	MNN47	MSB2	CAN1		orf19.5592		orf19.2585	ALS7	orf19.1008	orf19.693
orf19.1353-	PXP2-	orf19.2943.5-	orf19.1353+	orf19.344+	PGA10-		HGT20	CHA1	orf19.5019	SUR7	ADH2	orf19.1748		orf19.1353		BLP1	MRV2	orf19.3310	PGA10
AAF1-	orf19.1363+	PGA23-	CRZ2+	snR31a-	orf19.5212-		MCM6	snR189a	SEC61	orf19.264	SPT14	UGA2		IFE2		orf19.2943.5	PHO87	orf19.823	orf19.5212
ALS1-	orf19.510+	orf19.3310-	AAF1+	PUT1-	orf19.2943.5-		snR65	SCW11	GDI1	orf19.6077	orf19.6828.1	OST1		SOD3		orf19.1353	orf19.5141	snR71	orf19.2943.5
GAC1-	orf19.699+	orf19.1353-	ALS1+	CSH1-	PGA23-		LYS144	PGA10	GAT1	FET34	PSD1	YPT7		GAC1		GAC1	ADH4	MNN43	PGA23
UCF1-	MDR1+	AAF1-	GAC1+	PST2-	orf19.3310-		orf19.3954.1	HAK1	RAC1	RHA1	orf19.1307	orf19.557		HGT12		orf19.2429	TPO3	snR40	orf19.3310
GDB1-	orf19.3306+	ALS1-	UCF1+	orf19.2701+	tR(ACG)2-		orf19.4946	orf19.6718	USO6	orf19.6707	PIN3	CRH11		FAV2		UCF1	orf19.5231	snR5b	tR(ACG)2
RBR1-	SAP2+	GAC1-	GDB1+	RNR22-	orf19.1353-		WOR2		orf19.2092	orf19.2124	orf19.7181	orf19.6170		orf19.3337		AAF1	orf19.938	orf19.5289	orf19.1353
BLP1-	CWH8-	UCF1-	RBR1+	GLK4-	CRZ2-		orf19.4150		TUF1	RIB4	EXO70	BET2		orf19.3375		GDB1	orf19.4872	MRV1	CRZ2
orf19.4216-	ZCF4-	GDB1-	BLP1+	ALS3+	AAF1-		PGA37		CAN1	LIP1	MCD4	FLC3		orf19.6864		HSP12	orf19.5572	orf19.5306	AAF1
snR189a+	GAP2-	RBR1-	orf19.4216+	orf19.7085-	ALS1-		UGA4		APM1	BIO2	AGM1	NUP159		PGA23		orf19.11	SIM1	XOG1	ALS1
HSP12-	orf19.5069+	BLP1-	orf19.7056+	orf19.6025-	GAC1-		AGP3		orf19.6950	PTK2	orf19.3663.1	orf19.6968		orf19.4936.1		MAL31	orf19.6276	RTA3	GAC1
GLX3-	PGA26+	orf19.4216-	HSP12+	ABP2-	UCF1-		HNM1		orf19.6187	orf19.6578	HGT4	orf19.7225		AAF1		PHO113	PGA31	snR5c	UCF1
HSP21-	CSA2-	PHO113-	CHA1+	orf19.5289-	GDB1-		RDN18		ZCF20	orf19.6082	orf19.4134	orf19.1359		RSN1		GLX3	orf19.6501	IFG3	GDB1
ASR1-	orf19.6192-	snR189a-	GLX3+	QDR1-	RBR1-		orf19.6137		orf19.1611	orf19.6704	orf19.6630	ERV25		BLP1		ASR1	PGA26	orf19.4384.1	RBR1
MAL31-	SCW11+	HSP12-	HSP21+	ITS2-	BLP1-		orf19.173		SFU1	orf19.775	orf19.7538	CAB3		ATO1		CTN3	orf19.5269	snR44a	BLP1
orf19.344-	FDH1-	CHA1-	ASR1+	orf19.3442-	orf19.4216-		KAR4		orf19.6610	orf19.4780	TIF11	PTH2		tR(UCU)4		orf19.4216	orf19.6398	orf19.3442	orf19.4216
orf19.2431-	FRP6-	GLX3-	MAL31+	snR44a-	PHO113-		orf19.3984		YPS7	orf19.5763	ROT2	orf19.7152		RCT1		orf19.344	orf19.3048	orf19.6025	PHO113
STF2-	RPS14B-	HSP21-	orf19.344+	EFG1+	orf19.7056-		snR10a		SAP9	MRP8	orf19.3247	orf19.6874		IRF1		orf19.7576	orf19.5844	CSH1	orf19.7056
WH11-	orf19.7576-	ASR1-	orf19.2431+	orf19.2966-	snR189a-		PRN1		orf19.1748	orf19.2565	orf19.1917	orf19.292		MNN1		ALS1	FET3	ITS2	snR189a
orf19.2429-	MDH1-	MAL31-	STF2+	orf19.2371-	HSP12-		orf19.1999		FGR41	orf19.2125	ABP1	BUD2		orf19.2701		orf19.36.1	SPO11	PGA30	HSP12
ZRT101-	orf19.3508-	orf19.344-	WH11+	CCP1-	CHA1-		orf19.3711		PMT2	FGR23	SRT1	KIN3		orf19.4450.1		PST2	orf19.557	ENG1	CHA1
CTN3-	ACB1-	orf19.2431-	orf19.2429+	orf19.4942-	GLX3-		orf19.4748		orf19.1698	orf19.6871	orf19.5921	orf19.3247		orf19.6079		PUT1	orf19.5233	snR8a	GLX3
orf19.4450.1-	MSS51-	STF2-	ZRT101+	snR5b-	HSP21-		PGA48		orf19.1768	PIN3	orf19.5644	orf19.5952		orf19.7576		orf19.2701	CWP419	orf19.4814	HSP21
GLK1-		WH11-	CTN3+	FRE7+	ASR1-		MNN23		orf19.6227	ZCF26	TRM12	orf19.5275		orf19.1409.3		orf19.4450.1	orf19.3869	DAG7	ASR1
snR31a+		orf19.2429-	orf19.4450.1+	CRD2-	MAL31-		PHO4		orf19.5468	IST2	CTM1	PRX1		CTN3		CSP37	FMA1	SCR1	MAL31
orf19.2812-		ZRT101-	GLK1+	DEF1+	orf19.344-		FGR50		SFH5	SFH5	orf19.2506	orf19.1656		MAL31		orf19.3375	BMT4	orf19.6943	orf19.344
PUT1-		CTN3-	orf19.6718+	orf19.5592+	tL(UAA)2-		orf19.1392		MRE11	SUR2	CHS2	orf19.5455		tE(UUC)1		WH11	orf19.3376	CIS308	tL(UAA)2
REC8-		orf19.4450.1-	orf19.2812+	SCR1-	orf19.2431-		AMO1		orf19.1651	EAP1	POX18	GDI1		UME6		CUP1	FRP5	snR3a	orf19.2431
orf19.33-		GLK1-	PUT1+	orf19.4814-	STF2-		ARG5,6		orf19.2460	orf19.5169	ISN1	orf19.5692		PST1		GCA1	orf19.3748	ALS7	STF2
GIT1-		snR31a-	REC8+	orf19.1368-	WH11-		orf19.258		orf19.6707	SEO1	MUM2	orf19.1792		WOR4		HXT5	GDH3	orf19.4942	WH11
CUP1-		orf19.2812-	orf19.33+	CFL11+	orf19.2429-		DSE1		orf19.6770	PDC12	ALG6	RHB1		orf19.1736		orf19.2431	orf19.7306	orf19.1060	orf19.2429
PST2-		PUT1-	GIT1+	FMA1-	ZRT101-		GIT2		orf19.3679	TDH3	orf19.69	orf19.7445		orf19.6192		REC8	RHD1	orf19.2966	ZRT101
orf19.2701-		REC8-	CUP1+	RBT7-	CTN3-		ROA1		orf19.7196	ENO1	SUN41	PST3		HGT6		HSP21	orf19.3655	PHO89	CTN3
RNR22-		CSH1-	PST2+	GAL10-	orf19.4450.1-		SPO1		WOR2	orf19.4607	CDR11	orf19.3910		PGA10		orf19.4509	PHO89	snR189b	orf19.4450.1
GCA1-		orf19.33-	HAK1+	XOG1-	GLK1-		GDH3		orf19.1823	MAE1	orf19.2701	OPI3		PHR2		STF2	SCW11	OPT2	GLK1
GLK4-		GIT1-	orf19.2701+	snR5c-	orf19.6718-		CAN1		WSS1	orf19.6990	orf19.1246	orf19.5965		GDB1		CSH1	HGT20	CFL1	orf19.6718
PRA1-		CUP1-	RNR22+	CWP419-	snR31a-		snR67		PFY1	orf19.3325	orf19.7604	ERV29		IFA14		GLK1	orf19.1005	RDN58	snR31a
orf19.4749-		PST2-	GCA1+	IFE2+	orf19.2812-		SLP3		MRF1	orf19.6869	FAD2	GAT1		POL93		orf19.4749	PHO8	orf19.446.2	orf19.2812
ALS3-		HAK1-	GLK4+	orf19.6852.1-	PUT1-		UGA3		MEP2	orf19.1189	orf19.7328	orf19.1698		orf19.7029		orf19.6025	CFL4	orf19.3048	PUT1
orf19.4509-		orf19.2701-	PRA1+	OPT2-	REC8-		orf19.6288		CBP1	orf19.2274	SLM2	orf19.3898		GLX3		orf19.33	WOR2	SCW11	REC8
orf19.7085-		RNR22-	orf19.4749+	IHD1+	CSH1-		orf19.1584		TSC11	ZCF10	orf19.1748	DRS2		orf19.11		PGA10	CIS312	ABP2	CSH1
orf19.6311-		GCA1-	ALS3+	PHR2+	orf19.33-		HGT10		orf19.3259	PSD2	orf19.3053	STT3		HXT5		ASR3	MET18	orf19.3140	orf19.33
ADH5-		GLK4-	orf19.4509+	orf19.2372-	GIT1-		orf19.3586		OFI1	GAL4	TOS1	orf19.204		orf19.3499		orf19.3499	CHT2	orf19.1005	GIT1
HXT5-		PRA1-	orf19.7085+	orf19.3888.2-	CUP1-		orf19.4875		DUR1,2	orf19.3264.1	YCK2	orf19.6950		orf19.5431		GLK4	orf19.810	orf19.5844	CUP1
HGT12-		orf19.4749-	orf19.6311+	FAV1+	PST2-		MET18		NCE103	HPD1	orf19.3438	ZCF4		MNN12		ABP2	NRG1	ATO10	PST2
orf19.3643-		ALS3-	ADH5+	orf19.446.2-	HAK1-		IFF8		GIT2	MUM2	PGA32	GIT2		orf19.7380		orf19.5863	CFL1	orf19.1117	HAK1
CSP37-		orf19.4509-	HXT5+	snR8a-	orf19.2701-		PGA39		CDC11	IFR1	orf19.7260	MLC1		BRG1		orf19.2812	orf19.7502	snR67	orf19.2701
SHA3-		orf19.7085-	HGT12+	GLY1-	RNR22-		orf19.6277		orf19.1656	GPA2	MOB2	orf19.6493		IHD2		EFG1	snR189b	PIR1	RNR22
FRE30-		orf19.6025-	orf19.3643+	orf19.634-	GCA1-		orf19.7301		FLC3	TPI1	MLC1	orf19.7426		HSP12		ADH5	orf19.2024	HGT10	GCA1
ITS2+		orf19.6311-	CSP37+	PCK1+	GLK4-		orf19.3748		ERO1	FRE3	PBS2	CBP1		ASR3		orf19.3442	FRE10	FRP5	GLK4
orf19.36.1-		ADH5-	SHA3+	ATO10-	PRA1-		BMT9		SAP1	CDC19	orf19.3318	TSA1B		orf19.6816		orf19.2966	orf19.6277	orf19.1368	PRA1
orf19.4305-		HXT5-	QDR1+	orf19.2818-	orf19.4749-		orf19.3610		FET3	ICL1	orf19.6807	snR58		GCA1		orf19.3378	orf19.310	orf19.334	orf19.4749
snR44a+		CSP37-	FRE30+	snR3a-	ALS3-		orf19.2674		orf19.204	ACS1	orf19.2045	MED10		ADH5		orf19.4305	FGR41	orf19.1651	ALS3
EFG1-		SHA3-	orf19.36.1+	SOU1-	orf19.4509-		orf19.2916		HPA2	GFA1	URA6	FUM12		ALS1		orf19.670.2	RTA3	CHA1	orf19.4509
orf19.5863-		ABP2-	orf19.4305+	SNRNAU1-	orf19.7085-		DLH1		ARG5,6	orf19.3635	orf19.3475	SHY1		orf19.4384.1		ALS3	orf19.4875	FGR50	orf19.7085
orf19.2211-		orf19.5289-	EFG1+	RDN58-	orf19.6025-		orf19.4949		EXG2	RSR1	MNT2	AMO1		HGC1		orf19.1620	orf19.2674	SPO11	orf19.6025
orf19.3378-		QDR1-	CCP1+	PST1+	orf19.6311-		orf19.3869		orf19.1392	PHR1	RDI1	orf19.1307		orf19.36.1		GIT1	PGA38	PGA39	orf19.6311
YHB1-		FRE30-	orf19.2211+	QDR3-	ADH5-		FRE10		PTH2	orf19.2278	orf19.4668	DUR3		ADAEC		PXP2	ECM22	orf19.2371	ADH5
orf19.4942+		ITS2-	orf19.3378+	HRQ2+	HXT5-		orf19.4908		orf19.6054	MSS4	CUP5	MET13		orf19.4216		orf19.7085	ROA1	PGA31	HXT5
ASR3-		orf19.3442-	YHB1+	orf19.6350-	HGT12-		PHO89		orf19.3854	CDC11	FGR44	orf19.2509.1		CUP1		FAV1	ENG1	orf19.2818	HGT12
snR5b+		orf19.36.1-	ASR3+	orf19.675+	orf19.3643-		FMA1		CRH11	CDR1	orf19.6705	orf19.133		orf19.3378		RHR2	orf19.1392	orf19.2372	orf19.3643
FRE7-		orf19.4305-	FRE7+	orf19.1117-	CSP37-		CIS308		orf19.7301	OSM1	orf19.5536	orf19.3558		HSP21		orf19.5289	orf19.3586	PUT1	CSP37
orf19.5114.1-		PHO112-	CRD2+	orf19.2959.1+	SHA3-		orf19.7502		orf19.810	CTN1	orf19.2460	NBP2		orf19.1620		FMA1	ZCF4	SNRNAU1	SHA3
DEF1-		EFG1-	orf19.5114.1+	orf19.6017-	ABP2-		snR5b		PRE1	orf19.2529.1	orf19.2278	orf19.4597		MRV4		orf19.2371	HGT10	DSE1	ABP2
AHP1-		orf19.2966-	DEF1+	orf19.95-	orf19.5289-		NRG1		orf19.4459	WOR1	orf19.2452	orf19.7096		orf19.33		orf19.1862	orf19.6493	orf19.95	orf19.5289
orf19.1862-		orf19.5863-	AHP1+	orf19.4921.1-	QDR1-		PHO8		orf19.6282	ERG1	orf19.4121	UME6		GLK1		XOG1	SIW14	orf19.6288	QDR1
orf19.5592-		orf19.2371-	orf19.1862+	PSA2+	FRE30-		CHT3		HNM1	CPH1	USO6	orf19.6501		orf19.2429		orf19.1539	UGA3	RDN18	FRE30
SCR1+		CCP1-	TYE7+	ATO1+	ITS2-		PGA34		DUR3	YVC1	ERV46	orf19.6905		orf19.2959.1		orf19.3982	BMT9	BMT4	ITS2
CFL11-		orf19.2211-	orf19.5592+	LYS22-	orf19.3442-		BMT4		BET2	orf19.1440.2	orf19.5190	CDC11		RHR2		orf19.6859	IFF8	orf19.3869	orf19.3442
RHR2-		orf19.3378-	orf19.711+	orf19.334-	orf19.36.1-		orf19.2024		orf19.5210	orf19.3156	orf19.1391	SEC61		orf19.2431		CHA1	orf19.1943	ADH3	orf19.36.1
orf19.1620-		YHB1-	CFL11+	orf19.1736+	orf19.4305-		SCR1		PGA34	orf19.1152	orf19.1374	TSC11		PLB5		orf19.5592	orf19.3954.1	orf19.2968	orf19.4305
FMA1+		ASR3-	RHR2+	PTP3+	snR44a-		CFL4		orf19.751	VAM3	orf19.7269	orf19.4883		orf19.1409.2		ZRT101	DLH1	PHO8	snR44a
HGT2-		FRE7-	orf19.1620+	RTA3-	PHO112-		ECM22		ORC3	FMP45	orf19.258	HPA2		FCY2		orf19.2211	CAN1	orf19.1207	PHO112
ASM3-		CRD2-	FMA1-	CCC1-	EFG1-		PGA38		SLP3	orf19.4666	DPP3	orf19.3259		HRQ2		PHO112	orf19.4150	snR65	EFG1
ECM4-		orf19.5114.1-	HGT2+	SKN2-	orf19.2966-		orf19.3376		AMO1	orf19.1664	DPM3	SAP10		FRE7		orf19.5114.1	RNR3	orf19.3888.2	orf19.2966
orf19.1539-		DEF1-	ASM3+	orf19.4936.1+	orf19.5863-		orf19.5069		SCW11	THI13	AMS1	orf19.5210		orf19.4509		IFE2	RHB1	ADAEC	orf19.5863
orf19.3982-		AHP1-	ECM4+	WOR3+	orf19.2371-		RNR3		PGA32	orf19.90	SRB1	orf19.6282		orf19.6888		RNR22	SLP3	CHT3	orf19.2371
orf19.5514-		orf19.1862-	orf19.1539+	orf19.2781-	CCP1-		ENG1		OP4	GPM1	orf19.7670	SIW14		AGA1		snR189a	ALD5	FRE10	CCP1
CWP419+		TYE7-	XOG1-	CIS304-	orf19.2211-		RTA3		orf19.2905	UGP1	CDC3	orf19.3196		WOR3		DEF1	MNN23	orf19.7502	orf19.2211
IFE2-		orf19.5592-	orf19.3982+	orf19.2210+	orf19.3378-		CHT2		RHD1	HOL1	orf19.2459	ERO1		STF2		snR5c	orf19.6874	CIRT4B	orf19.3378
orf19.2515-		orf19.711-	snR5c-	AMS1+	YHB1-		orf19.4789		MET13	orf19.5288.1	GST3	DAG7		orf19.2515		HRQ2	SEF2	GCV2	YHB1
orf19.5431-		orf19.1368-	orf19.5514+	GCV2-	orf19.4942-		MNN41		HEX1	orf19.4711	IST2	FET3		PCK1		HGT2	GIT2	DLH1	orf19.4942
orf19.6859-		CFL11-	CWP419-	CDR11+	ASR3-		snR189b		PRN1	SLK19	orf19.1738.1	VPS16		CIP1		orf19.2781	PHO4	RBT7	ASR3
IHD1-		RHR2-	IFE2+	ENG1-	snR5b-		orf19.6501		orf19.6200	orf19.7092	orf19.6905	PFY1		CSP37		orf19.6017	CWH8	orf19.6017	snR5b
PHR2-		orf19.1620-	orf19.2515+	PYC2-	FRE7-		snR8a		GDH3	DPP3	orf19.3051	RNR3		C2_06450C		orf19.2515	orf19.134	IRF1	FRE7
orf19.3499-		FMA1-	orf19.5431+	SNRNAU4-	CRD2-		orf19.810		orf19.7295	MNT4	orf19.4459	orf19.1823		ECM331		OPT2	PGA34	CRD2	CRD2
FAV1-		HGT2-	orf19.6859+	AAP1-	orf19.5114.1-		FGR41		orf19.1844	orf19.199	orf19.3898	orf19.3123.2		PGA61		PST1	orf19.5735.3	orf19.3320	orf19.5114.1
PTC8-		RBT7-	IHD1+	MNN12+	DEF1-		orf19.1599		orf19.1584	LSP1	UFE1	orf19.5825.1		orf19.1862		ECM4	PRM9	CIS304	DEF1
snR8a+		ASM3-	PHR2+	orf19.6288-	AHP1-		orf19.557		SAP10	PLB4.5	MRE11	orf19.7196		GLG2		PRA1	CDC6	orf19.4940	AHP1
orf19.3444-		ECM4-	orf19.3499+	CIRT4B-	orf19.1862-		snR3a		orf19.2459	BUL1	NCE103	PGA1		tD(GUC)5		RPS14B	XOG1	SOU1	orf19.1862
orf19.2038-		orf19.1539-	FAV1+	orf19.3713-	TYE7-		orf19.6398		IFF8	PGK1	orf19.1369	orf19.6807		FRE30		ATO10	HNM1	orf19.3376	TYE7
MNN24-		GAL10-	PTC8+	UEC1-	orf19.5592-		orf19.3048		RPS9B	PXA1	MRP8	orf19.1584		orf19.2812		AHP1	orf19.1707	orf19.4946	orf19.5592
orf19.670.2-		XOG1-	orf19.3444+	ECM331+	SCR1-		orf19.4942		orf19.3021	orf19.6855	orf19.4349	orf19.6003		orf19.6200		SOU1	orf19.173	CCC1	SCR1
orf19.6816-		orf19.3982-	orf19.2038+	HWP2+	orf19.4814-		orf19.3655		CHT1	orf19.915	PDR17	HNM1		PLB1		orf19.5514	ATX1	PGA38	orf19.4814
PCK1-		snR5c-	MNN24+	orf19.1080-	orf19.711-		orf19.5141		YWP1	orf19.2296	ERV25	MNN41		ASR1		orf19.1167	orf19.3984	AAP1	orf19.711
orf19.1167-		orf19.5514-	orf19.670.2+	RDN18-	orf19.1368-		FET3		NGT1	PGA57	orf19.2024	PMT2		orf19.6592		SHA3	ENA2	orf19.2925	orf19.1368
snR3a+		IFE2-	orf19.6816+	snR67-	CFL11-		snR31a		OPT1	PLB3	orf19.7539.1	SLP3		orf19.7567		FRE30	CHT3	orf19.6501	CFL11
PST1-		orf19.2515-	PCK1+	GPD2-	RHR2-		ADH4		orf19.6391	DOG1	orf19.5626	GDA1		CTR1		orf19.2038	orf19.1584	RDN25	RHR2
MNN4-		orf19.6852.1-	PST1+	GPX2+	orf19.1620-		RHD1		YHB4	RHO2	orf19.6754	MEA1		RBT1		PCL1	DSE1	GCV1	orf19.1620
orf19.4530.1-		OPT2-	BUL1+	BRG1+	FMA1-		SIM1		UME6	orf19.1433	orf19.6170	orf19.7228		orf19.4305		CAN2	HCM1	RBR2	FMA1
ADH1-		orf19.6859-	MNN4+	DIM1-	HGT2-		SPO11		orf19.5929	orf19.1562	BMT7	PGA32		PST2		GAL10	orf19.3711	orf19.4875	HGT2
SIT1-		IHD1-	orf19.4530.1+	orf19.4946-	RBT7-		snR189a		SIM1	NAT4	orf19.5861.1	ORC3		AMS1		CFL11	PST3	orf19.3954.1	RBT7
HRQ2-		PHR2-	ADH1+	orf19.809-	ASM3-		CIS312		ARO9	PGA56	orf19.1424	orf19.5468		orf19.2210		SRG1	orf19.750	NRG1	ASM3
orf19.4779-		orf19.3499-	SIT1+	snR190-	ECM4-		snR44a		orf19.7077	BMT7	orf19.3123.2	orf19.1392		orf19.3643		CIS304	orf19.1268	PHO84	ECM4
GLG2-		orf19.2372-	HRQ2+	PUT2-	orf19.1539-		snR40		orf19.5141	orf19.4763	orf19.1285	DPP1		ZRT101		RBT7	ENA21	BMT9	orf19.1539
orf19.675-		FAV1-	HGT7+	ENP2-	GAL10-		orf19.938		PPS1	HXK2	MSS4	orf19.2657		RFX2		orf19.6852.1	orf19.4783	orf19.1080	GAL10
SRG1-		orf19.446.2-	orf19.4779+	snR65-	XOG1-		PGA31		MET4	CCP1	WSC2	YHB4		PXP2		GLG2	orf19.2262	SNRNAU4	XOG1
orf19.2959.1-		PTC8-	PLB4.5+	orf19.6366-	orf19.3982-		orf19.5844		RNR3	PDC11	PGA57	orf19.5233		MNN24		FRP3	FMO1	LYS22	orf19.3982
orf19.265-		orf19.3444-	GLG2+	AAT21-	snR5c-		orf19.5572		orf19.1326	HEX1	DUR3	orf19.1651		PRA1		orf19.2959.1	SNM1	PGA48	snR5c
orf19.3793-		orf19.2038-	orf19.675+	BIO4+	orf19.5514-		orf19.5212		orf19.5572	orf19.4880	orf19.90	orf19.6753		orf19.2175		PHR2	orf19.7301	orf19.557	orf19.5514
orf19.1440.2-		MNN24-	orf19.2959.1+	RBR2-	CWP419-		orf19.1651		ADH3	SLN1	orf19.3843	YPS7		orf19.670.2		orf19.446.2	SWE1	SPO1	CWP419
MNN15-		orf19.670.2-	orf19.265+	orf19.5038-	IFE2-		CWP419		orf19.703	orf19.3461	OST1	HEX1		REC8		orf19.95	orf19.341	AGP2	IFE2
PGA46-		GLY1-	orf19.3793+	FGR50-	orf19.2515-		IFG3		MNN41	orf19.1991	GLO3	orf19.1326		orf19.4749		orf19.634	CFL5	ADE6	orf19.2515
GDH2-		orf19.634-	orf19.1440.2+	RMS1-	orf19.6852.1-		TPO3		orf19.258	CPP1	orf19.1792	IFF8		HGT19		IHD1	SPO1	GAL10	orf19.6852.1
PSA2-		PCK1-	MNN15+	orf19.4940-	OPT2-		ALS7		PIR1	orf19.3885	GAP2	orf19.2459		orf19.2038		orf19.7567	LYS144	PGA5	OPT2
ATO1-		orf19.1167-	PGA46+	RDN25-	orf19.5431-		DAG7		ZCF25	MRF1	SEC9	orf19.6148		MNN14		PCK1	MCM2	orf19.7085	orf19.5431
PXP2-		ATO10-	GDH2+	FAV2+	orf19.6859-		orf19.2638.1		TPO3	RAS1	orf19.5984	orf19.6200		orf19.6859		CPP1	orf19.4818	PHO87	orf19.6859
YVC1-		orf19.2818-	PSA2+	PGA61+	IHD1-		SCW11		orf19.6148	orf19.2726	MPT5	RPS9B		PSA2		orf19.2372	ESC4	ASR1	IHD1
orf19.1152-		SOU1-	ATO1+	ADH2+	PHR2-		PGA26		orf19.3461	orf19.1539	DFI1	ARO9		GIT1		ATO1	HSP31	orf19.4921.1	PHR2
CTN1-		PST1-	PXP2+	orf19.6152-	orf19.3499-		ADH3		orf19.5249	SRR1	RAC1	OP4		orf19.2505		MNN24	MNN13	CFL5	orf19.3499
orf19.715-		BUL1-	YVC1+	REI1-	orf19.2372-		PHO87		PGA30	orf19.3501	orf19.3558	orf19.3461		orf19.5611		CCP1	orf19.6027	QDR1	orf19.2372
orf19.1736-		MNN4-	orf19.1152+	orf19.6888+	orf19.3888.2-		orf19.6276		orf19.5140	orf19.1239	DPM2	orf19.751		PGA46		MNN4	orf19.4748	SKN2	orf19.3888.2
PTP3-		orf19.4530.1-	CTN1+	ADE6-	FAV1-		orf19.936		orf19.6737	orf19.3219	orf19.2163	PHO87		OPT4		ITS2	MDH11	UEC1	FAV1
NAT4-		ADH1-	orf19.715+	orf19.6316.4-	orf19.446.2-		CSA2		PHO87	CSR1	orf19.2447	WOR2		MAL2		CRD2	PTR22	ECM22	orf19.446.2
HXK2-		SIT1-	orf19.1736+	snR10a-	PTC8-		MRV2		orf19.3460	orf19.711	orf19.2061	OPT1		KIP4		orf19.6311	orf19.1935	orf19.2781	PTC8
RTA3+		QDR3-	PTP3+	PHO84-	HSP30-		orf19.3897		PGA6	AHP1	orf19.7111	CDC13		WH11		FRE7	GDA1	orf19.809	HSP30
MNT4-		HRQ2-	NAT4+	PGA48-	snR8a-		PIR1		FLO9	PUT1	orf19.35.1	PPS1		PTP3		CTN1	AMO1	snR72	snR8a
orf19.1363-		HGT7-	HXK2+	CIC1-	orf19.3444-		tK(UUU)3		PGA58	orf19.6475	SEC1	NGT1		OPT6		ALD6	snR5c	orf19.6366	orf19.3444
LYS143-		orf19.4779-	RTA3-	WSC2+	orf19.2038-		orf19.5933		orf19.3655	MNT2	orf19.6414	orf19.6660		orf19.4055		orf19.4530.1	orf19.258	CCP1	orf19.2038
orf19.1562-		PLB4.5-	MNT4+	orf19.2925-	MNN24-		orf19.5306		orf19.2024	DCK1	STT3	PIR1		orf19.6608		orf19.3156	orf19.1287	ENP2	MNN24
GPH1-		GLG2-	PGI1+	GCV1-	orf19.1344-		PGA30		CSA2	tP(UGG)3	ZCF10	orf19.6276		orf19.675		orf19.1440.2		orf19.664	orf19.1344
orf19.4936.1-		orf19.675-	orf19.2529.1+	RCT1+	orf19.670.2-		orf19.5233		orf19.6276	orf19.69	orf19.3060	orf19.258		WSC2		MNN15		FGR41	orf19.670.2
WOR3-		SRG1-	PGA45+	snR66-	GLY1-		orf19.1258		HSP31	NTH1	LIP1	orf19.2905		ALD6		orf19.1736		RNR22	GLY1
orf19.2781-		orf19.2959.1-	orf19.1363+	OPT4+	orf19.634-		YWP1		orf19.2638.1	orf19.1654	orf19.6872	GAP2		GPX2		GDH2		GLY1	orf19.634
CPP1-		orf19.6017-	LYS143+	orf19.4273-	orf19.6816-		RBE1		CIS312	orf19.4668	orf19.2123	ZCF25		orf19.2211		QDR1		orf19.6852.1	orf19.6816
orf19.3156-		orf19.95-	orf19.1562+	HWP1+	PCK1-		orf19.3621		orf19.750	SAC7	CPH1	orf19.3021		orf19.3982		snR31a		orf19.3713	PCK1
orf19.5288.1-		orf19.3793-	GPH1+	DSE1-	orf19.1167-		RHD3		CHT2	orf19.3793	orf19.3021	YWP1		LAP3		orf19.3924		orf19.6350	orf19.1167
orf19.2210-		orf19.1440.2-	orf19.4936.1+	HAC1+	ATO10-		orf19.2366		PGA26	orf19.4507	orf19.751	orf19.5572		orf19.265		YVC1		orf19.173	ATO10
AMS1-		MNN15-	WOR3+	HGT6+	orf19.2818-				MRV5	PXP2	orf19.7304	orf19.5249		SHA3		AMS1		orf19.2778	orf19.2818
GAD1-		PGA46-	CPP1+	orf19.3341-	snR3a-				orf19.5069	UGA6	FAS2	orf19.3061.1		orf19.6311		MNN12		QDR3	snR3a
CDR11-		GDH2-	orf19.3156+	SUT1-	SOU1-				NAG4	orf19.2638	orf19.3910	orf19.6557		orf19.2076		orf19.5532		FET3	SOU1
ALD6-		PSA2-	orf19.5288.1+	orf19.5611+	SNRNAU1-				orf19.2317	orf19.4121	PHM7	TRS33		BIO4		PGA46		orf19.5038	SNRNAU1
FRP3-		ATO1-	orf19.2210+	orf19.1409.2+	RDN58-				orf19.5233	TNA1	CEK1	orf19.6737		BIO3		orf19.1152		orf19.634	RDN58
ENG1+		orf19.334-	AMS1+	CFL1-	PST1-				orf19.3897	orf19.6113	orf19.4597	SIM1		FRP3		orf19.5549		CPD2	PST1
orf19.1664-		PXP2-	GAD1+	PHO89-	BUL1-				orf19.1258	orf19.6920	PTP3	GDH3		orf19.6113		orf19.715		orf19.6316.4	BUL1
TEC1-		YVC1-	CDR11+	HGT10-	MNN4-				RBT1	MRV8	UGA32	orf19.5069		orf19.7360		LAP3		orf19.1906	MNN4
MNN12-		SFL2-	ALD6+	CUP9-	orf19.4530.1-				RHD3	GRE2	IML2	orf19.7295		HWP2		MNT4		snR190	orf19.4530.1
ZCF27-		orf19.1152-	FRP3+	orf19.6137-	ADH1-				MRV2	orf19.716	YKT6	ADH3		SIR2		orf19.334		snR10a	ADH1
HOL1-		CTN1-	ENG1-	URA2-	SIT1-				orf19.2366	orf19.5114.1	BMT5	TPO3		GCY1		orf19.716		MET18	SIT1
orf19.6288+		orf19.715-	orf19.1664+	AGP2-	QDR3-					TYE7	ARF3	orf19.3460		GPH1		GPH1		XUT1	QDR3
AHR1-		orf19.1736-	TEC1+	orf19.2457+	HRQ2-					orf19.7531	orf19.1656	orf19.703		MAC1		FDH1		ROA1	HRQ2
orf19.7341-		PTP3-	orf19.6245+	FCY2+	HGT7-					FTR2	PLC1	orf19.3655		RPS14B		YHB1		orf19.2581	HGT7
SIR2-		NAT4-	MNN12+	orf19.3810-	orf19.4779-					QDR1	PCK1	PGA26		SOD5		ADH1		GLK4	orf19.4779
orf19.7567-		HXK2-	FGR23+	HMS1-	PLB4.5-					orf19.1793	orf19.3769	FLO9		orf19.2638		CFL1		orf19.4273	PLB4.5
UGA6-		CCC1-	HOL1+	PHM7+	GLG2-					orf19.5514	OPT4	CIS312		GRP2		orf19.5288.1		orf19.341	GLG2
ECM331-		MNT4-	AHR1+	orf19.6307-	orf19.6350-					orf19.3444	orf19.675	PGA6		orf19.5532		orf19.1664		orf19.1943	orf19.6350
HWP2-		PGI1-	orf19.7341+	orf19.4668+	orf19.675-					GDH2	orf19.1144	orf19.5269		CBP1		IFR1		ENA2	orf19.675
IFR1-		LYS143-	FBA1+	MNT2+	SRG1-					UAP1	FLU1	orf19.5140		orf19.716		SIT1		HGT20	SRG1
AOX1-		orf19.1562-	SIR2+	orf19.2061+	orf19.1117-					orf19.4779	BIO4	orf19.5141		SIT1		PUT2		CUP9	orf19.1117
orf19.3325-		SKN2-	orf19.7567+	VTC3-	orf19.2959.1-					HGT2	orf19.1181	NAG4		orf19.6968		SKN2		orf19.6152	orf19.2959.1
GRE2-		GPH1-	UGA6+	ADE4-	orf19.265-					orf19.1277	orf19.5941	orf19.2024		MRV8		SIR2		orf19.6137	orf19.265
RDN18+		WOR3-	ECM331+	GRP2+	orf19.6017-					orf19.2061	PSA2	PGA30		orf19.7341.1		orf19.5125		ADE4	orf19.6017
snR67+		orf19.2781-	HWP2+	orf19.175-	orf19.95-					orf19.2691	PLD1	CHT2		HGT9		PGI1		orf19.3810	orf19.95
ENO1-		CPP1-	IFR1+	SOD5+	orf19.3793-					orf19.4508	orf19.3782	HSP31		orf19.6148		GLY1		DIM1	orf19.3793
PCL1-		orf19.3156-	AOX1+	PLB5+	SLU7-					orf19.5532	UAP1	orf19.750		BMT7		HGT7		CRP1	SLU7
OSM1-		orf19.5288.1-	orf19.3325+	UAP1+	orf19.1440.2-					FRP3	ZCF32	orf19.2317		YHB1		HPD1		CFL2	orf19.1440.2
snR33a-		CIS304-	GRE2+	orf19.4805+	MNN15-					orf19.4805	orf19.7152	orf19.5933		PUT1		NAT4		CFL4	MNN15
orf19.5532-		orf19.2210-	TDH3+	KAR4-	orf19.4921.1-					orf19.4530.1	orf19.7629	PGA58		orf19.3826		GAD1		orf19.175	orf19.4921.1
WOR1-		AMS1-	ENO1+	CFL5-	PGA46-					SHE3	ZCF30	orf19.3897		CDR11		MLS1		HMS1	PGA46
GPX2-		GCV2-	OSM1+	CFL2-	GDH2-					DAP1	orf19.6055	MET3		orf19.7305		AHR1		PST2	GDH2
BRG1-		GAD1-	orf19.5532+	orf19.2175+	PSA2-					orf19.3679	TSC11	MRV5		orf19.1433.1		ECM331		GPD2	PSA2
PGK1-		CDR11-	WOR1+	DPP3+	ATO1-					orf19.2317	orf19.6739	orf19.937		SKN7		orf19.3444		snR66	ATO1
orf19.4946+		ALD6-	GPX2+	orf19.3219+	LYS22-					MAC1	RSR1	orf19.2638.1		orf19.6605		TYE7		VTC3	LYS22
orf19.915-		FRP3-	BRG1+	RSR1+	orf19.334-					PTC8	ZCF26	orf19.936		orf19.2457		orf19.2638		AAT21	orf19.334
LAP3-		PYC2-	PGK1+	orf19.1246+	PXP2-					AOX1	orf19.3219	CSA2		HAC1		ICL1		orf19.3341	PXP2
orf19.7341.1-		PGA62-	orf19.915+	orf19.2506+	YVC1-					orf19.450	HGT1	orf19.6192		ADH2		orf19.711		orf19.3303	YVC1
orf19.4508-		PDX3-	LAP3+	orf19.3475+	SFL2-					PGA45	HAC1	RBT1		orf19.715		orf19.4508		REI1	SFL2
orf19.2726-		orf19.1664-	orf19.7341.1+	RFX2+	orf19.1152-					SKN7	FGR34	orf19.1258		IRO1		HXK2		URA2	orf19.1152
GPM1-		orf19.6245-	orf19.4508+	orf19.1369+	CTN1-					YKE2	CDC10	MRV2		GLK4		ZCF27		SUT1	CTN1
orf19.716-		MNN12-	orf19.2726+	orf19.199+	orf19.715-					MDR1	orf19.3364	RHD3		orf19.1768		GPD2		orf19.1529	orf19.715
orf19.7305-		ZCF27-	SEO1+	ISN1+	orf19.1736-					MNN4	orf19.7196	orf19.2366		ECM4		FAV2		CIC1	orf19.1736
snR65+		FGR23-	GPM1+	orf19.4134+	PTP3-					XYL2	orf19.211			CPP1		orf19.3661		orf19.6277	PTP3
HPD1-		HOL1-	orf19.716+	orf19.6705+	NAT4-					GAD1	orf19.4666			XYL2		WOR3		KAR4	NAT4
orf19.3885-		AHR1-	orf19.7305+	orf19.2123+	HXK2-					MNN15	ERV29			YKE2		orf19.6990		PUT2	HXK2
orf19.3635-		CIRT4B-	HPD1+	SUN41+	MCM1-					PHM7	MDG1			ADH1		orf19.1562		orf19.2674	MCM1
DAP1-		orf19.3713-	orf19.3885+	CEK1+	RTA3-					orf19.6579	MNN47			PGA58		SFL2		orf19.6307	RTA3
BIO4-		UEC1-	orf19.3635+	orf19.4711+	CCC1-					orf19.6605	orf19.4805			orf19.4508		snR33a		PYC2	CCC1
ICL1-		orf19.7341-	orf19.1765+	FAD2+	MNT4-					orf19.670.2	2023-09-07			orf19.6606		XKS1		RHD1	MNT4
ACS1-		FBA1-	DAP1+	MNN47+	PGI1-					SUC1	orf19.2657			MNN15		GPX1		orf19.1150	PGI1
IDP2-		SIR2-	RHA1+	CDC20+	orf19.2529.1-					TEN1	orf19.4391			MNN4		orf19.4264		RMS1	orf19.2529.1
orf19.4880-		orf19.7567-	BIO4+	orf19.3826+	PGA45-					MKK2	SUA72			TEN1		ACS1			PGA45
orf19.1277-		ECM331-	ICL1+	ROA1-	orf19.1363-					orf19.7085	DCK1			GAD1		RDN5			orf19.1363
FGR50+		IFR1-	ACS1+	orf19.5626+	LYS143-					LAP3	orf19.2691			orf19.4121		SAP7			LYS143
orf19.1433-		SAM4-	IDP2+	CDC3+	orf19.1562-					orf19.715	orf19.5468			TUB1		PTC8			orf19.1562
orf19.6920-		AOX1-	orf19.4880+	SRT1+	SKN2-					EXG2	ZFU2			orf19.1539		orf19.2818			SKN2
orf19.4940+		RDN5-	orf19.1277+	orf19.1654+	GPH1-					ECM4	orf19.1541			orf19.7341		QDR3			GPH1
FAV2-		orf19.3325-	orf19.1433+	FGR41-	orf19.4936.1-					ERG251	PMT2			FDH1		PLB4.5			orf19.4936.1
PGA61-		GRE2-	PGA28+	orf19.1793+	WOR3-					IRO1	INP51			SHE3		RIB3			WOR3
ADH2-		TDH3-	orf19.6920+	YCK2+	orf19.2781-					HGT19	BEM2			orf19.4507		ARA1			orf19.2781
PDC11-		ENO1-	GAL4+	orf19.3264.1+	CPP1-					orf19.6968	orf19.1063			GDH2		EBP1			CPP1
orf19.6888-		PCL1-	FAV2+	TOS1+	orf19.3156-					LYS143	DPM1			orf19.2061		orf19.2210			orf19.3156
orf19.3932-		XKS1-	PGA61+	RHO2+	orf19.5288.1-					orf19.2076	VPS16			CR_02900W		GOR1			orf19.5288.1
orf19.6869-		OSM1-	ADH2+	PLD1+	CIS304-					ADH2	SLN1			HGT2		orf19.3435			CIS304
GRE3-		snR33a-	PDC11+	RDI1+	orf19.2210-					orf19.7341	VAM3			orf19.4530.1		PSA2			orf19.2210
LSP1-		orf19.5532-	orf19.5620+	BEM2+	AMS1-					ALD6	CHS4			orf19.1964		orf19.6852			AMS1
RAS1-		WOR1-	MDR1+	orf19.6630+	GCV2-					orf19.3982	orf19.7426			SAP7		AAT21			GCV2
PFK2-		GPD2-	orf19.6888+	orf19.1424+	GAD1-					CCE1	orf19.5019			MKK2		GRE3			GAD1
snR10a+		DIM1-	orf19.6869+	MSB2+	CDR11-					orf19.3460	RDH54			orf19.1167		IDP2			CDR11
SFC1-		PGK1-	LSP1+	orf19.7304+	ALD6-					orf19.4055	RAX2			orf19.4805		AOX1			ALD6
orf19.2638-		orf19.915-	RAS1+	PDR17+	FRP3-					orf19.7504	HET1			MNT2		orf19.3007.2			FRP3
PGA48+		GOR1-	PTK2+	orf19.3869-	orf19.2607-					WSC2	orf19.6855			orf19.5514		PDX3			orf19.2607
CSR1-		LAP3-	CDR1+	PHR1+	ENG1-					TEC1	orf19.732			NTH1		GLC3			ENG1
WSC2-		orf19.7341.1-	FRE3+	orf19.7539.1+	PYC2-					orf19.7305	orf19.7425			orf19.1991		WSC2			PYC2
PFK1-		orf19.4508-	orf19.2638+	CHS4+	PGA62-					RNR22	orf19.2959.1			AOX1		orf19.7341			PGA62
STE50-		GPM1-	CSR1+	MDG1+	PDX3-					GPH1	YPS7			AOX2		OPT4			PDX3
orf19.6143-		PUT2-	WSC2+	orf19.1374+	orf19.1664-					HAC1	orf19.4423			orf19.6990		FBA1			orf19.1664
SRR1-		SNZ1-	ERG1+	DFI1+	TEC1-					orf19.7303	orf19.5611			UAP1		PGA62			TEC1
RCT1-		orf19.5549-	SNG4+	orf19.2163+	orf19.6245-					OPT4	FTR2			SUC1		orf19.1774			orf19.6245
OPT4-		orf19.6852-	SRR1+	PSD1+	SNRNAU4-					SIR2	FRE7			orf19.6579		orf19.1368			SNRNAU4
orf19.5169-		orf19.716-	RCT1+	CDC10+	AAP1-					orf19.929	orf19.7069			orf19.3924		orf19.4779			AAP1
orf19.4507-		orf19.6637-	CDC19+	SUA72+	MNN12-					ADH1	ERG251			orf19.3460		orf19.5158			MNN12
orf19.5125-		orf19.7305-	OPT4+	orf19.5644+	ZCF27-					CBP1	NGT1			TNA1		orf19.3793			ZCF27
GCA2-		orf19.3661-	orf19.5169+	DIT2+	FGR23-					orf19.5611	orf19.3854			orf19.3501		DOT5			FGR23
GPX1-		HPD1-	orf19.4507+	orf19.3487+	HOL1-					GLK4	orf19.685.1			CAN2		PTP3			HOL1
orf19.4264-		SNO1-	HWP1+	orf19.1391+	orf19.6288-					orf19.6859	KEX1			orf19.3156		UEC1			orf19.6288
HWP1-		orf19.257-	orf19.2125+	orf19.3663.1+	AHR1-					orf19.1844	DIT2			ERG251		ENO1			AHR1
MLS1-		orf19.3635-	DSE1-	SEC9+	CIRT4B-					SOD5	THI13			ICL1		orf19.3932			CIRT4B
orf19.2125-		GYP7-	HAC1+	orf19.1917+	orf19.3713-					BIO3	orf19.6282			DOG1		WOR1			orf19.3713
DSE1+		orf19.758-	HGT6+	orf19.3769+	UEC1-					GRP2	HSE1			HPD1		orf19.3325			UEC1
HAC1-		AAT21-	RIB4+	EXO70+	orf19.7341-					orf19.7341.1	orf19.2210			SLK19		HAK1			orf19.7341
HGT6-		orf19.5158-	ATC1+	SRB1+	FBA1-					AOX2	orf19.1823			CEK1		RBR2			FBA1
RIB4-		BIO4-	orf19.5611+	orf19.685.1+	SIR2-					orf19.3826	CDC12			orf19.1433		orf19.6245			SIR2
MRPL8+		ICL1-	orf19.1409.2+	RAX2+	orf19.7567-					HGT9	MEP2			LYS143		PGA60			orf19.7567
ATC1-		CAG1-	UGP1+	orf19.1285+	UGA6-					orf19.2457	TUB2			PHM7		BUL1			UGA6
orf19.5611-		ACS1-	CFL1-	orf19.2447+	ECM331-					orf19.1363	YPT7			EXG2		AGP2			ECM331
orf19.3684-		IDP2-	EAP1+	orf19.3782+	HWP2-					PST2	SAP9			CTN1		PGA61			HWP2
orf19.1409.2-		RBR2-	PHO89-	orf19.1768+	IFR1-					orf19.7567	orf19.5342			orf19.1793		CFL5			IFR1
UGP1-		orf19.3302-	MAE1+	orf19.3501+	SAM4-					CHA1	PLB3			orf19.5114.1		FGR23			SAM4
PHO89+		orf19.3007.2-	HGT10-	orf19.2565+	AOX1-					CSP37	orf19.3264.1			DPP3		orf19.675			AOX1
HGT10+		orf19.1774-	orf19.5763+	orf19.4349+	RDN5-					BIO4	orf19.2509.1			KAR9		orf19.3684			RDN5
orf19.5763-		GLC3-	PGA56+	orf19.35.1+	orf19.1080-					SIT1	orf19.6950			CSR1		orf19.1301			orf19.1080
PGA56-		orf19.757.1-	orf19.2296+	SEP7+	orf19.3325-					orf19.7077	GPX2			ACS1		orf19.1529			orf19.3325
orf19.6137+		orf19.1433-	orf19.1991+	CHS2+	GRE2-					MAL2	VPS70			orf19.5125		ASM3			GRE2
orf19.2296-		BEM1-	orf19.2457+	orf19.7425+	RDN18-					orf19.1964	CHT2			MNT4		LYS143			RDN18
orf19.1991-		RIB3-	FCY2+	SEC1+	orf19.2552-					orf19.1768	PGA54			HEX1		orf19.6869			orf19.2552
orf19.2457-		EBP1-	SLK19+	PDC12+	TDH3-					REC8	GDI1			orf19.6491		orf19.1433			TDH3
FAA21-		FAV2-	PHM7+	CUP5+	snR67-					orf19.2175	ECM331			orf19.1664		orf19.3635			snR67
FCY2-		PGA61-	orf19.4780+	CDC12+	ENO1-					orf19.2038	orf19.321			RHO2		HOL1			ENO1
BUD14-		ADH2-	DOG1+	GLO3+	PCL1-					PGA46	orf19.2457			orf19.5288.1		SNZ1			PCL1
SLK19-		MOH1-	SUR7+	orf19.3843+	XKS1-					WH11	orf19.199			orf19.1654		GPM1			XKS1
PHM7-		orf19.5299.1-	orf19.6871+	MPT5+	GPR1-					orf19.36.1	SHE3			PCL1		orf19.7305			GPR1
IPT1-		KRE6-	GPA2+	DPM2+	OSM1-					CRZ2	TUB1			orf19.7085		ZCF15			OSM1
orf19.4780-		orf19.3932-	orf19.4668+	MET18-	orf19.510-					OPT6	HWP2			FTR2		PYC2			orf19.510
orf19.1037-		orf19.6869-	orf19.6082+	orf19.1144+	snR33a-					CDR11	orf19.5932			MLS1		orf19.164			snR33a
DOG1-		GRE3-	orf19.4305.1+	SEC6+	orf19.5532-					MNN14	orf19.5692			orf19.5863		BIO5			orf19.5532
orf19.6871-		orf19.164-	MNT2+	HET1+	WOR1-					ASM3	IQG1			FRP6		FAA21			WOR1
GPA2-		ZCF15-	orf19.2061+	orf19.4391+	GPD2-					orf19.2429	orf19.4711			orf19.1239		orf19.3713			GPD2
orf19.338-		PFK2-	GRP2+	orf19.6277-	HIT1-					orf19.2211	OP4			orf19.2278		SFC1			HIT1
orf19.4668-		SFC1-	PSD2+	ALS7-	GPX2-					orf19.4749	PXA1			YVC1		PGK1			GPX2
orf19.6082-		DOT5-	GFA1+	MP65+	BRG1-					AMS1	orf19.7368			orf19.2125		orf19.7341.1			BRG1
orf19.4305.1-		orf19.2638-	orf19.775+	DCK2+	DIM1-					KIP4	XYL2			orf19.3679		OSM1			DIM1
MNT2-		WSC2-	orf19.1189+	YKT6+	PGK1-					orf19.6608	PHR1			orf19.5861.1		TDH3			PGK1
orf19.2061-		orf19.1301-	SOD5+	orf19.6828.1+	orf19.4946-					HRQ2	orf19.1239			orf19.6475		GRE2			orf19.4946
GRP2-		GAL1-	PLB5+	ERV46+	orf19.915-					MNN24	ARG1			orf19.3508		orf19.5611			orf19.915
PSD2-		RCT1-	UAP1+	orf19.5941+	GOR1-					tL(UAA)1	orf19.6606			GRE2		orf19.6578			GOR1
GFA1-		OPT4-	orf19.4805+	HGT1+	LAP3-					HAK1	orf19.3259			SLN1		GCV2			LAP3
orf19.5587-		orf19.4507-	SUR2+	MCD4+	orf19.7341.1-					GLG2	PGA17			IFR1		CAG1			orf19.7341.1
orf19.775-		PIL1-	CFL5-	orf19.7269+	orf19.4508-					orf19.265	orf19.1326			SRR1		DIM1			orf19.4508
orf19.1189-		orf19.5125-	orf19.2175+	USO6+	orf19.2726-					orf19.4305	orf19.2565			THI13		orf19.757.1			orf19.2726
SOD5-		GCA2-	DPP3+	orf19.4607+	SEO1-					orf19.6592	ZCF25			orf19.2123		orf19.2125			SEO1
CST5-		GPX1-	FET34+	IQG1+	GPM1-					orf19.4653	HYR1			GPX1		BEM1			GPM1
PLB5-		orf19.4264-	orf19.3219+	INP51+	orf19.809-					GPX2	orf19.6048			orf19.1152		CIRT4B			orf19.809
UAP1-		MLS1-	RSR1+	orf19.3679+	snR190-					ASR1	RPS9B			orf19.6578		orf19.3302			snR190
orf19.5282-		orf19.2125-	RFX2+	IML2+	PUT2-					PTP3	GRP2			ASM3		orf19.257			PUT2
orf19.4805-		RIB4-	orf19.199+	ALG6+	NDH51-					orf19.6200	orf19.2132			orf19.4763		orf19.7214			NDH51
orf19.2769-		orf19.21-	orf19.3984-	PGA54+	VHT1-					orf19.6148	orf19.676			orf19.1440.2		GYP7			VHT1
AYR2-		orf19.5611-	orf19.4711+	orf19.1738.1+	SNZ1-					PGA61	SAC7			orf19.6704		orf19.6637			SNZ1
KAR4+		BIO5-	MNN23-	MEP2+	orf19.5549-					orf19.4384.1	TRS33			orf19.6855		orf19.758			orf19.5549
KEX2-		orf19.3684-	MNN47+	orf19.1063+	orf19.6852-					PSA2	BET2			orf19.6869		ADH2			orf19.6852
orf19.2175-		ARA1-	orf19.3826+	RAC1+	orf19.716-					orf19.1862	PDC12			UGP1		CCC1			orf19.716
DPP3-		CFL1-	ROA1-	orf19.7368+	orf19.6637-					orf19.2210	SEC61			ZCF26		RCT1			orf19.6637
FET34-		AGP2-	SWE1-	SFH5+	orf19.699-					ECM331	orf19.5069			orf19.1277		GAL1			orf19.699
orf19.3219-		FAA21-	orf19.1654+	orf19.7328+	ENP2-					RFX2	SOD5			MUM2		SAM4			ENP2
RSR1-		CFL5-	FGR41-	orf19.3438+	orf19.3175-					CIP1	SKN7			DCK1		RIB4			orf19.3175
RFX2-		FGR41+	orf19.1793+	orf19.3060+	orf19.7305-					HWP2	RHO2			NAT4		MOH1			orf19.7305
orf19.1369-		orf19.4347+	orf19.3264.1+	HGT20-	orf19.3661-					orf19.4509	CRH11			RIB4		KRE6			orf19.3661
orf19.199-		SYG1+	RHO2+	CFL4-	snR65-					orf19.675	orf19.2905			orf19.4666		BIO4			snR65
orf19.2123-		orf19.1582+	MDH1-1-	SAP9+	orf19.4657-					orf19.2515	MKK2			orf19.4711		orf19.21			orf19.4657
orf19.3984+		orf19.1768+	orf19.3869-	GEF2+	HPD1-					GIT1	WOR3			orf19.199		CDR11			HPD1
CEK1-		USO6+	PHR1+	orf19.3364+	orf19.3885-					SHA3	TSA1B			CPH1		PFK2			orf19.3885
orf19.4711-		PGA34+	PTR22-	MRF1+	CAT1-					RHR2	orf19.2076			HXK2		orf19.5299.1			CAT1
MNN23+		orf19.3679+	ATX1-	AGM1+	SNO1-					YHB1	PPS1			RSR1		SNO1			SNO1
orf19.3826-		orf19.3711+	MCM2-	ARF3+	GLT1-					orf19.3499	orf19.7458			orf19.5587		PIL1			GLT1
ROA1+		MEP2+	SNM1-	DPM1+	orf19.257-					orf19.1620	SFH5			orf19.7578		GCA2			orf19.257
CPA2+		orf19.7301+	SEF2-	orf19.2460+	RPC10-					CTR1	OPT1			orf19.5763		orf19.915			RPC10
orf19.1654-		RAC1+	orf19.4818-	orf19.2274+	orf19.3635-					orf19.6718	orf19.4607			CRN1		orf19.4507			orf19.3635
FGR41+		orf19.7368+	orf19.6027-	orf19.7538+	orf19.2333-					orf19.2959.1	orf19.7227			orf19.2202					orf19.2333
orf19.1793-		SFH5+	orf19.1287-	orf19.3854+	orf19.1765-					PCK1	PGA61			orf19.4264					orf19.1765
orf19.3264.1-		orf19.6610+	CDC6-	TUB2+	GYP7-					CUP1	orf19.1611			PDC11					GYP7
orf19.413-		CFL4+	orf19.1768+	orf19.4423+	orf19.6366-					PLB1	TNA1			orf19.7214					orf19.6366
RHO2-		SAP9+	orf19.3501+	IRO1+	orf19.758-					FCY2	orf19.1654			TEC1					orf19.758
orf19.3869+		SFL1+	orf19.2565+	orf19.5921+	AAT21-					orf19.2812	AOX2			orf19.2296					AAT21
PHR1-		MRF1+	orf19.1707-	HGT4+	DAP1-					WOR3	orf19.6707			AHP1					DAP1
CHS4-		orf19.2460+	PHO4-	orf19.5190+	RHA1-					orf19.1409.2	orf19.6605			orf19.3885					RHA1
MCM2+		orf19.6227+	PDC12+	MRE11+	orf19.5158-					ASR3	orf19.2274			LSP1					orf19.5158
SUA72-		orf19.2274+	MET18-	orf19.6707+	BIO4-					MRV4	YKE2			orf19.1562					BIO4
KNS1+		ARG5,6+	orf19.4150-	ROT2+	ICL1-					tD(GUC)5	orf19.1793			PGA17					ICL1
orf19.4818+		DUR1,2+	orf19.6277-	orf19.732+	ZCF5-					orf19.6888	orf19.6113			GFA1					ZCF5
UGA4+		orf19.3854+	ALS7-	orf19.7604+	CAG1-					orf19.3378	NTH1			RAS1					CAG1
orf19.685.1-		orf19.3586+	orf19.4607+	orf19.1611+	ACS1-					GCA1	orf19.6608			GPM1					ACS1
orf19.3782-		SFU1+	PGA34-	KEX1+	IDP2-					RBT1	CTR1			PGA56					IDP2
orf19.1768-		ZCF20+	orf19.3679+	EXG2+	MTLALPHA1-					orf19.4654	MAC1			RNR22					MTLALPHA1
orf19.3501-		orf19.3704.1+	LYS144-	orf19.5932+	orf19.4880-					orf19.33	orf19.3501			PGK1					orf19.4880
orf19.2565-		MRE11+	orf19.3711-	RHD1-	orf19.1277-					GLK1	orf19.3061.1			DAP1					orf19.1277
orf19.7425-		orf19.6707+	ALD5-	orf19.676+	orf19.2253-					orf19.6311	orf19.2175			orf19.3219					orf19.2253
PHO4+		orf19.810+	orf19.7301-	FGR34+	RBR2-					STF2	orf19.6579			MDH1					RBR2
PDC12-		orf19.1611+	SFH5+	orf19.1748+	orf19.3302-					PRA1	orf19.1964			PSD2					orf19.3302
MET18+		PRN1+	HGT20-	OST1+	orf19.3007.2-					orf19.7380	SAP10			CDC11					orf19.3007.2
orf19.4150+		SAP1+	orf19.2262-	YPT7+	TPS1-					orf19.2431	orf19.7531			orf19.3635					TPS1
orf19.6277+		TUF1+	CFL4-	orf19.557-	orf19.5038-					HXT5	RBR1			orf19.4668					orf19.5038
ALS7+		EXG2+	MNN13-	CRH11+	orf19.1774-					ADAEC	PST1			IDP2					orf19.1774
orf19.4607-		RHD1+	MRF1+	orf19.6170+	HAP41-					HSP12	PFY1			orf19.2726					HAP41
PGA34+		CAN1+	orf19.2274+	BET2+	FGR50-					FRE30	orf19.5210			IST2					FGR50
orf19.3679-		orf19.1748+	CWH8-	FLC3+	GLC3-					orf19.1409.3	MRF1			SRG1					GLC3
LYS144+		YPT7+	orf19.3586-	orf19.6968+	orf19.757.1-					HGC1	MRV8			orf19.3684					orf19.757.1
orf19.3711+		orf19.557+	IRO1+	orf19.1359+	orf19.2350-					PLB5	OPT6			FET34					orf19.2350
orf19.7301+		CRH11+	orf19.6707+	ERV25+	orf19.1433-					MNN12	MNN12			SFC1					orf19.1433
HGT20+		orf19.6170+	orf19.810-	orf19.7152+	RMS1-					orf19.3643	HPA2			GPA2					RMS1
CFL4+		BET2+	orf19.1611+	orf19.3247+	PGA28-					ZRT101	SUC1			TPI1					PGA28
SFL1+		FLC3+	EXG2+	orf19.1656+	BEM1-					orf19.4216	CCE1			WOR1					BEM1
MRF1-		PTH2+	RHD1-	GDI1+	orf19.6920-					ADH5	orf19.6888			orf19.3435					orf19.6920
orf19.2274-		PRX1+	CAN1-	orf19.5692+	GAL4-					IFA14	orf19.6737			UGA6					GAL4
ARG5,6+		orf19.1656+	orf19.557-	orf19.1792+	orf19.4940-					SOU2	PHR2			orf19.5536					orf19.4940
orf19.3586+		GDI1+	orf19.6968+	orf19.3910+	orf19.6929-					orf19.693	CDC11			orf19.4780					orf19.6929
IRO1-		GAT1+	orf19.6874-	ERV29+	LAB5-					CTN3	orf19.3679			orf19.1189					LAB5
orf19.810+		orf19.1698+	RHB1-	orf19.3898+	RIB3-					FRE7	orf19.750			orf19.4607					RIB3
PRN1+		orf19.3898+	PST3-	STT3+	RIM11-					IHD2	orf19.703			orf19.1363					RIM11
SAP1+		orf19.204+	ZCF4-	orf19.6950+	RDN25-					PST1	HSP31			orf19.4880					RDN25
EXG2-		orf19.6950+	GIT2-	MLC1+	BNA32+					orf19.6816	PGA6			MRF1
RHD1+		GIT2+	orf19.6493-	orf19.7426+	HMX1+					HSP21	orf19.1844			orf19.2317
orf19.676-		CBP1+	CBP1+	CBP1+	ROT2+					WOR4	orf19.3826			orf19.6920
CAN1+		AMO1+	AMO1-	TSA1B+	orf19.732+					GLX3	KIP4			SUA72
orf19.557+		DUR3+	UME6+	orf19.1307+	orf19.7604+					orf19.1506	orf19.7303			IPT1
orf19.6968-		MET13+	orf19.6501-	DUR3+	orf19.1611+					orf19.2701	MAL2			orf19.264
PTH2+		UME6+	CDC11+	orf19.2509.1+	orf19.6558+					MAL31	orf19.1409.2			orf19.6082
RHB1+		CDC11+	orf19.5210+	orf19.3558+	KEX1+					orf19.1736	orf19.5140			orf19.915
ERV29-		SEC61+	SIW14-	orf19.4597+	RPN12+					ALS1	orf19.5249			orf19.2124
GIT2+		TSC11+	DAG7-	UME6+	PRN1+					BRG1	CIP1			orf19.5282
orf19.6493+		orf19.4883+	FET3-	orf19.6501-	SAP1+					GDB1	FCY2			orf19.2781
CBP1-		HPA2+	RNR3-	orf19.6905+	AXL2+					orf19.4450.1	orf19.1736			PFY1
AMO1+		orf19.3259+	orf19.1584-	CDC11+	TUF1+					PHR2	ARO9			orf19.3932
orf19.2509.1-		SAP10+	HNM1-	SEC61+	EXG2+					orf19.7056	UCF1			STE50
UME6-		orf19.5210+	SLP3-	TSC11+	orf19.5932+					POL93	IRO1			orf19.775
orf19.6501+		orf19.6282+	GDA1-	HPA2+	RHD1+					orf19.5431	FLO9			orf19.6143
CDC11-		ERO1+	orf19.1392-	orf19.3259+	orf19.676+					HGT6	EXG2			TPS3
DAG7+		FET3+	orf19.5233-	SAP10+	FGR34+					PGA23	orf19.4055			orf19.4305.1
FET3+		PFY1+	orf19.1651-	orf19.5210+	CAN1+					tE(UUC)1	orf19.6968			orf19.6198.1
PFY1-		RNR3+	HEX1+	orf19.6282+	orf19.1748+					RCT1	AGA1			orf19.413
RNR3+		orf19.1823+	IFF8-	DAG7-	UGA2+					BLP1	MRV2			CST5
orf19.1584+		orf19.7196+	orf19.6148+	FET3-	OST1+					HGT12	SAP5			AYR2
HNM1+		orf19.1584+	orf19.6200+	VPS16+	YPT7+					orf19.6079	orf19.1768			orf19.4779
MNN41+		HNM1+	orf19.3461+	PFY1+	orf19.557+					IRF1	HEX1			BUD14
SLP3+		MNN41+	PHO87-	orf19.1823+	CRH11+					RSN1	BRG1			orf19.2769
orf19.1392+		PMT2+	WOR2-	orf19.3123.2+	orf19.6170+					ATO1	orf19.2505			CHS4
orf19.5233+		SLP3+	PIR1-	orf19.7196+	BET2+					orf19.11	RFX2			FAA21
orf19.1651+		PGA32+	orf19.6276-	orf19.6807+	FLC3+					orf19.6864	orf19.7380			orf19.270
HEX1-		ORC3+	orf19.258-	PMT2+	NUP159+					UME6	orf19.3461			OSM1
IFF8+		orf19.5468+	YWP1-	PGA32+	orf19.6968+					FAV2	CBP1			orf19.3444
orf19.6148-		orf19.1392+	orf19.5572-	orf19.5468+	orf19.7225+					MNN1	PLB1			orf19.2274
orf19.6200-		DPP1+	SIM1-	orf19.2657+	orf19.1359+					GAC1	PLB5			orf19.3793
PHO87+		YHB4+	GDH3-	orf19.1651-	ERV25+					AAF1	HGC1			BMT8
WOR2+		orf19.5233+	ADH3-	YPS7+	CAB3+					tR(UCU)4	orf19.344			orf19.7425
PIR1+		orf19.1651+	TPO3-	HEX1+	PTH2+					IFE2	RBT4			HOL1
orf19.6276+		YPS7+	orf19.3460+	orf19.1326+	orf19.7152+					orf19.4936.1	orf19.1506			PHR1
orf19.258+		HEX1+	orf19.3655-	orf19.2459+	orf19.6874+					SOD3	ATO1			AHR1
YWP1+		orf19.1326+	PGA26-	orf19.6148+	orf19.292+					orf19.1353	MRV4			orf19.4229
orf19.5572+		IFF8+	CIS312-	orf19.6200+	BUD2+					orf19.3337	orf19.7077			orf19.6872
SIM1+		orf19.2459+	orf19.5269-	RPS9B+	KIN3+					orf19.5592	NAG4			PDC12
GDH3+		orf19.6148+	orf19.5141-	ARO9+	orf19.3247+					PGA10	MNN14			GRE3
orf19.5069+		orf19.6200+	orf19.2024-	OP4+	orf19.5952+					IHD1	IFE2			ENO1
ADH3+		RPS9B+	PGA30-	orf19.3461+	orf19.5275+					RBR1	RSN1			orf19.2509.1
TPO3+		ARO9+	CHT2-	orf19.751+	PRX1+					FAV1	ALS3			PFK1
orf19.3460-		OP4+	HSP31-	PHO87-	orf19.1656+					ALS3	orf19.5592			orf19.2565
orf19.3655+		orf19.3461+	orf19.750-	OPT1+	orf19.5455+					UCF1	HGT6			MSS4
PGA26+		orf19.751+	orf19.2317+	PPS1+	GDI1+					orf19.344	IHD2			ERV29
CIS312+		PHO87+	orf19.5933-	NGT1+	orf19.5692+					HYR1	orf19.4886			orf19.3782
orf19.5141+		WOR2+	orf19.3897-	PIR1-	orf19.1792+					orf19.1691	RCT1			STE11
orf19.2024+		OPT1+	MET3-	orf19.258+	RHB1+					DEF1	orf19.3460			orf19.1037
PGA30+		PPS1+	orf19.2638.1-	orf19.2905+	orf19.7445+					orf19.3375	IHD1			orf19.1369
CHT2+		NGT1+	orf19.936-	GAP2+	PST3+					DDR48	FAV2			PFK2
orf19.750+		PIR1+	CSA2-	ZCF25+	orf19.3910+					CFL11	orf19.6200			orf19.2800
orf19.2317-		orf19.6276+	RBT1+	orf19.3021+	OPI3+					SAP4	orf19.6148			FAV3
orf19.5933+		orf19.258+	orf19.1258-	YWP1-	orf19.5965+					SAP5	tE(UUC)1			orf19.3264.1
PGA58-		orf19.2905+	MRV2-	orf19.5249+	ERV29+					RBT4	orf19.6864			ATC1
orf19.3897+		ZCF25+	RHD3-	orf19.3061.1+	GAT1+					SAP6	FAV1			PIN3
orf19.2638.1+		orf19.3021+	orf19.2366-	TRS33+	orf19.1698+					EFG1	orf19.4936.1			orf19.3325
orf19.936+		YWP1+	SOU2+	orf19.6737+	orf19.3898+					HWP1	SOD3			PTC8
CSA2+		orf19.5572+	WOR4+	orf19.5069+	DRS2+					ECE1	MRV5			GNP2
orf19.6192-		orf19.5249+	orf19.6592+	ADH3-	STT3+						PGA58			orf19.5411
RBT1-		orf19.6737+	tL(UAA)1+	orf19.3460+	orf19.204+						orf19.6192			orf19.685.1
orf19.1258+		SIM1+	orf19.4654+	orf19.703+	orf19.6950+						orf19.7029			orf19.3456
MRV2+		GDH3+	tD(GUC)5+	FLO9+	ZCF4+						DEF1			orf19.676
RHD3+		orf19.5069+	IFA14+	PGA6+	GIT2+						orf19.2317			GCA2
orf19.2366+		orf19.7295+	RSN1+	orf19.5140+	MLC1+						CFL11			orf19.5169
WOR4-		ADH3+	BIO3+	NAG4+	orf19.6493+						POL93			KEX2
snR40+		TPO3+	orf19.929+	orf19.2024+	orf19.7426+						orf19.6079			orf19.6871
orf19.6592-		orf19.3460+	orf19.1409.3+	PGA30-	CBP1+						UME6			ZCF27
tK(UUU)3+		orf19.703+	SOD3+	CHT2+	TSA1B+						ECE1			RAX1
tD(GUC)5-		orf19.3655+	tP(UGG)3+	HSP31+	snR58+						RBT1			GST3
IFA14-		PGA26+	orf19.7504+	orf19.750+	MED10+						EFG1			UFE1
RSN1-		FLO9+	CTR1+	orf19.2317+	FUM12+						HWP1			snR33a
orf19.4789+		CIS312+	HGT9+	PGA58+	SHY1+									orf19.338
C2_06450C-		PGA6+	orf19.4653+	MRV5+	AMO1+									orf19.5495
CIS308+		orf19.5140+	orf19.6990+	orf19.6192+	orf19.1307+
BIO3-		orf19.5141+	TEN1+	RBT1+	DUR3+
CAN2-		NAG4+	orf19.6578+	MRV2+	MET13+
PGA39+		orf19.2024+	snR189b-	orf19.1968-	orf19.2509.1+
orf19.1409.3-		PGA30+	FAV3+	orf19.2539-	orf19.133+
SOD3-		CHT2+	orf19.6608+	ASG7-	orf19.3558+
orf19.4949+		HSP31+	orf19.6475+	orf19.1008-	NBP2+
orf19.1433.1-		orf19.750+	orf19.1506+	MNN43-	orf19.4597+
GCY1-		orf19.2317+	CHT3-	tY(GUA)1-	orf19.7096+
IFG3+		PGA58+	orf19.450+	snR40-	UME6+
CTR1-		orf19.3897+	orf19.6864+	MRV1-	orf19.6501+
HGT9-		MRV5+	BIO2+	orf19.1060-	orf19.6905+
orf19.2916+		orf19.2638.1+	FMP45+	RSN1+	CDC11+
orf19.6990-		CSA2+	orf19.3621-	CIS308-	SEC61+
TEN1-		RBT1+	HGT19+	PGA39-	TSC11+
orf19.6578-		orf19.1258+	orf19.69+	SOD3+	orf19.4883+
snR189b+		MRV2+	orf19.4121+	orf19.823-	HPA2+
FAV3-		RHD3+	orf19.4763+	snR71-	orf19.3259+
orf19.6608-		orf19.2366+	ERG251+	IFG3-	SAP10+
orf19.6475-		CAN2-	orf19.7380+	CTR1+	orf19.5210+
orf19.3924-		orf19.6990-	SPO1-	CPD2-	orf19.6282+
CHT3+		orf19.6578-	orf19.5669+	snR72-	SIW14+
SAP7-		PGA60-	TPI1+	orf19.2968-	orf19.3196+
orf19.6864-		orf19.3924-	SCW11-	snR189b-	ERO1+
orf19.7214-		SAP7-	orf19.1005-	orf19.3140-	DAG7+
orf19.3621+		orf19.7214-	DLH1-	orf19.3303-	FET3+
HGT19-		orf19.3435-	orf19.2691+	orf19.1207-	VPS16+
orf19.2778+		orf19.1529-	AOX2+	orf19.6608+	PFY1+
orf19.4121-		SCW11+	tE(UUC)1+	orf19.1506+	RNR3+
orf19.2202-		FDH1-	BMT7+	CHT3-	orf19.1823+
orf19.4763-		orf19.2092+	CIP1+	orf19.6943-	orf19.3123.2+
orf19.3435-		orf19.6770+	orf19.264+	orf19.6864+	orf19.5825.1+
ERG251-		RPS14B-	orf19.7092+	orf19.664-	orf19.7196+
GNP2-		orf19.7576-	orf19.6704+	orf19.3621-	PGA1+
orf19.7380-		OFI1+	PGA57+	orf19.2778-	orf19.6807+
orf19.270-		orf19.1844+	orf19.1964+	orf19.69+	orf19.1584+
SPO1+		SPT14+	orf19.6077+	orf19.4121+	orf19.6003+
TPI1-		orf19.5019+	FTR2+	orf19.2581-	HNM1+
SCW11+		orf19.4459+	HGC1+	ERG251+	MNN41+
orf19.6491-		PRE1+	DCK1+	orf19.1906-	PMT2+
DLH1+		APM1+	XYL2+	orf19.7380+	SLP3+
AOX2-		orf19.1541+	MUM2+	PGA5-	GDA1+
orf19.4229-		NCE103+	OPT6+	orf19.1529-	MEA1+
KAR9-		orf19.6187+	orf19.2278+	tT(AGU)4-	orf19.7228+
tE(UUC)1-		WSS1+	orf19.90+	XUT1-	PGA32+
BMT7-		MET4+	PIN3+	SPO1-	ORC3+
CIP1-		orf19.6054+	orf19.341-	SCW11-	orf19.5468+
orf19.264-		orf19.5929+	orf19.2124+	orf19.1005-	orf19.1392+
orf19.6198.1-		orf19.7077+	orf19.3954.1-	DLH1-	DPP1+
orf19.6704-		CHT1+	SHE3+	orf19.2691+	orf19.2657+
CRP1+		orf19.6391+	orf19.173-	orf19.3320-	YHB4+
orf19.1964-			SLN1+	AOX2+	orf19.5233+
orf19.3456-			orf19.2076+	tE(UUC)1+	orf19.1651+
FTR2-			KRE1+	BMT7+	orf19.6753+
TPS3-			MSS4+	CIP1+	YPS7+
HGC1-			MKK2+	CRP1-	HEX1+
DCK1-			FRP5-	PGA57+	orf19.1326+
XYL2-			CPH1+	orf19.1964+	IFF8+
MUM2-			KIP4+	FTR2+	orf19.2459+
OPT6-			BMT9-	orf19.1150-	orf19.6148+
orf19.2278-			PGA38-	HGC1+	orf19.6200+
FDH1-			FRE10-	DCK1+	RPS9B+
BMT8-			ENA2-	XYL2+	ARO9+
PIN3-			IST2+	MUM2+	OP4+
orf19.2124-			PLB1+	OPT6+	orf19.3461+
orf19.3954.1+			SKN7+	orf19.2278+	orf19.751+
SHE3-			orf19.6855+	orf19.90+	PHO87+
MCM6+			orf19.4748-	PIN3+	WOR2+
orf19.173+			orf19.1935-	orf19.341-	OPT1+
SLN1-			orf19.7502-	orf19.3954.1-	CDC13+
orf19.2076-			ENA21-	SHE3+	PPS1+
MSS4-			MRP8+	orf19.173-	NGT1+
MKK2-			ZCF10+	SLN1+	orf19.6660+
CPH1-			orf19.6605+	orf19.2076+	PIR1+
CRN1-			orf19.4666+	MSS4+	orf19.6276+
orf19.3610+			IHD2+	MKK2+	orf19.258+
KIP4-			PHO8-	FRP5-	orf19.2905+
BMT9+			orf19.4783-	CPH1+	GAP2+
PGA38+			orf19.4875-	KIP4+	ZCF25+
FRE10+			VAM3+	BMT9-	orf19.3021+
ENA2+			orf19.1239+	PGA38-	YWP1+
IST2-			THI13+	FRE10-	orf19.5572+
CR_02900W-			PLB3+	ENA2-	orf19.5249+
PLB1-			LIP1+	IST2+	orf19.3061.1+
SKN7-			ESC4-	ARG1+	orf19.6557+
orf19.6855-			SAC7+	PLB1+	TRS33+
orf19.4748+			YKE2+	SKN7+	orf19.6737+
orf19.5411-			ZCF26+	orf19.6855+	SIM1+
orf19.7502+			MAL2+	orf19.7502-	GDH3+
FRP6-			ECM22-	MRP8+	orf19.5069+
STE11-			orf19.3048-	ZCF10+	orf19.7295+
AQY1+			orf19.1943-	orf19.6605+	ADH3+
orf19.6605-			orf19.1268-	orf19.4666+	TPO3+
orf19.4908+			PXA1+	IHD2+	orf19.3460+
orf19.4666-			MRV4+	orf19.7260+	orf19.703+
IHD2-			BMT4-	PHO8-	orf19.3655+
orf19.2800-			orf19.5735.3-	orf19.7227+	PGA26+
PHO8+			TNA1+	orf19.4875-	FLO9+
orf19.4875+			FMO1-	orf19.4241+	CIS312+
AGP3+			NRG1-	VAM3+	PGA6+
orf19.1999+			orf19.6579+	PTP1+	orf19.5269+
orf19.5536-			MAC1+	orf19.5536+	orf19.5140+
orf19.1239-			orf19.5844-	orf19.1239+	orf19.5141+
THI13-			PRM9-	orf19.3051+	NAG4+
RAX1-			HCM1-	orf19.3053+	orf19.2024+
RPS14B-			UGA3-	THI13+	PGA30+
YKE2-			orf19.1844+	PLB3+	CHT2+
ZCF26-			SPO11-	LIP1+	HSP31+
MAL2-			orf19.134-	orf19.3318+	orf19.750+
ECM22+			orf19.6113+	VAC8+	orf19.2317+
orf19.7576-			CCE1+	SAC7+	orf19.5933+
orf19.7360-			NTH1+	YKE2+	PGA58+
orf19.5495-			orf19.3376-	ZCF26+	orf19.3897+
orf19.3048+			orf19.2674-	orf19.6726+	MET3+
orf19.5861.1-			SUC1+	MAL2+	MRV5+
MRV4-			orf19.7303+	orf19.7670+	orf19.937+
BMT4+			orf19.7531+	ECM22-	orf19.2638.1+
TNA1-			orf19.310-	ABP1+	orf19.936+
NRG1+			MRV8+	orf19.4574+	CSA2+
orf19.6579-			orf19.4055+	CTM1+	orf19.6192+
MAC1-			PGA31-	orf19.5495+	RBT1+
orf19.5844+			orf19.7306-	orf19.3048-	orf19.1258+
MDH1-			orf19.3748-	orf19.1943-	MRV2+
orf19.5573+			orf19.6079+	orf19.5861.1+	RHD3+
UGA3+			MNN14+	PXA1+	orf19.2366+
SPO11+			orf19.7077+	RDH54+
orf19.3508-			orf19.6398-	MRV4+
orf19.6113-			POL93+	MOB2+
GST3-			orf19.5306-	BMT4-
orf19.7244+			orf19.5231-	TNA1+
AGA1-			orf19.4872-	NRG1-
orf19.1599+			ADH4-	orf19.6579+
NTH1-			orf19.938-	MAC1+
orf19.3376+			RBE1-	POX18+
orf19.2674+				orf19.5844-
orf19.6872-				URA6+
SUC1-				orf19.7181+
orf19.7578-				SLM2+
orf19.6606-				orf19.2452+
UFE1-				orf19.1844+
PGA37+				ZFU2+
PGA17-				SPO11-
MRV8-				FAS2+
orf19.2505-				orf19.6113+
orf19.4055-				CCE1+
PGA31+				PBS2+
TUB1-				GST3+
orf19.3748+				orf19.1181+
orf19.6079-				FLU1+
MNN14-				AGA1+
orf19.6398+				SPT14+
POL93-				orf19.5019+
orf19.5306+				orf19.4886+
orf19.7029-				NTH1+
ADH4+				orf19.6414+
orf19.938+				HSE1+
RBE1+				orf19.7458+
				orf19.4459+
				orf19.3376-
				orf19.2674-
				orf19.6872+
				SUC1+
				orf19.7069+
				orf19.7303+
				orf19.211+
				orf19.6606+
				orf19.7144+
				orf19.7531+
				UFE1+
				orf19.2045+
				DPM3+
				UGA32+
				PGA17+
				APM1+
				orf19.6739+
				orf19.5342+
				MRV8+
				orf19.7581+
				orf19.1541+
				orf19.7111+
				orf19.2132+
				FGR44+
				NCE103+
				orf19.2505+
				BMT5+
				orf19.6754+
				TRM12+
				VPS70+
				orf19.4055+
				ZCF30+
				orf19.7629+
				PGA31-
				PLC1+
				orf19.321+
				TIF11+
				TUB1+
				ZCF32+
				orf19.6055+
				orf19.5984+
				orf19.6079+
				MNN14+
				orf19.6048+
				orf19.7077+
				POL93+
				orf19.5306-
				orf19.7029+
				RBE1-

## Sheet: 3
	efg1ΔΔ vs WT		RBT5-UME6 vs WT		efg1ΔΔRBT5-UME6 vs efg1ΔΔ		efg1ΔΔRBT5-UME6 vs RBT5-UME6
Gene	Log2FC	padj	Log2FC	padj	Log2FC	padj	Log2FC	padj
SAP6	-12.6711	0	-0.687209	0.0374944	0.496812	0.21631	-11.4871	0
SAP5	-11.9092	1.50793e-22	-0.724099	9.22977e-07	3.20578	0.0296591	-7.97932	4.30507e-50
RBT4	-11.9977	0	-0.504161	0.0080588	3.80588	5.34138e-41	-7.68761	0
HWP1	-14.2041	0	0.213278	0.0544624	13.6584	0	-0.759007	4.96664e-18
orf19.1691	-7.80659	9.28415e-26	0.279045	0.835866	0.991985	0.296858	-7.09365	2.25422e-22
ALS3	-6.99743	0	0.476141	4.06213e-11	4.11633	0	-3.35724	0
HYR1	-7.2149	0	0.816786	7.4297e-21	1.81663	1.50691e-53	-6.21506	0
orf19.3337	-6.14612	8.11928e-27	0.530425	0.379926	-1.02773	0.344301	-7.70428	2.71194e-23
CFL11	-8.26791	1.23254e-10	0.275889	NA	6.07052	4.88159e-06	-2.47328	4.62339e-08
IRF1	-5.42977	2.31064e-60	0.005355	0.984308	-1.67717	0.0286541	-7.11229	2.9175e-30
FAV1	-7.8958	1.67729e-130	-0.674138	5.8887e-05	5.07879	6.42177e-53	-2.14288	3.8334e-42
orf19.4936.1	-6.05209	2.29757e-258	0.559431	1.643e-05	5.07885	6.2541e-180	-1.53266	7.04161e-39
IHD1	-6.83733	0	0.151912	0.19819	4.80407	0	-2.18518	2.62138e-152
RAS2	-3.11374	NA	-0.00724161	NA	0	1	-2.78589	NA
orf19.7056	-3.93487	0.067621	0.891007	NA	0	1	-4.50527	0.0300712
RTA4	-4.17374	0.0568765	-0.345538	NA	1.2824	0.670703	-2.5458	0.297918
DEF1	-8.08595	6.96349e-198	0.109467	0.5355	5.58686	6.10102e-93	-2.60856	1.05469e-118
PGA23	-6.08258	0	-0.899038	9.23001e-18	0.137476	0.409792	-5.04606	0
orf19.6864	-6.08812	9.15637e-06	-0.436746	NA	5.05823	0.000297822	-0.59315	0.448692
FAV2	-6.2713	0	-0.464647	4.58531e-06	4.81709	2.07882e-231	-0.989567	8.09845e-26
orf19.344	-8.08553	1.86182e-13	-0.105658	0.849254	3.77826	0.00170168	-4.20161	1.35342e-23
RSN1	-5.99351	8.1292e-05	-0.473184	NA	4.02057	0.0158756	-1.49976	0.213061
MAL31	-4.91479	9.01733e-61	-0.390066	0.163689	0.304168	0.541984	-4.22056	9.22643e-44
orf19.5431	-4.32053	0.000754104	0.614317	NA	2.74065	0.0522674	-2.1942	0.00681248
ATO1	-5.84941	3.58304e-166	-0.320462	0.260528	3.84292	3.86036e-71	-1.68603	5.85652e-17
FRE30	-3.14038	1.11793e-11	0.746257	0.247273	0.866081	0.0992618	-3.02055	7.14392e-11
ALS1	-3.90475	1.93294e-258	0.642067	2.89135e-11	-0.337776	0.0432735	-4.88459	0
RBT1	-3.02338	2.92658e-136	0.648105	9.46718e-10	9.47691	0	5.80543	0
BRG1	-4.20051	3.59895e-97	0.356697	0.197298	3.28294	2.69143e-59	-1.27427	3.98364e-10
ADH5	-3.9349	8.66554e-19	0.162196	0.85134	0.852037	0.095005	-3.24506	4.90245e-13
orf19.3643	-2.86609	0.0106196	1.09927	NA	0.840285	0.582572	-3.12508	0.00153199
CUP1	-3.81414	1.37731e-43	-0.44237	0.27	-0.0423258	0.925348	-3.4141	7.90051e-35
GLX3	-4.48743	0	-0.0625442	0.619332	0.0444808	0.705623	-4.3804	0
UME6	-4.82299	0	0.838354	4.90059e-24	7.0002	0	1.33886	9.18455e-65
HSP21	-3.71018	1.42653e-16	0.64709	0.307139	0.000795398	1	-4.35647	4.17663e-22
orf19.4450.1	-5.05931	1.60072e-06	-0.347301	NA	1.0672	0.490354	-3.64481	6.87855e-05
RCT1	-5.4828	2.71715e-48	-0.241475	0.695034	4.43052	1.2963e-31	-0.810799	0.0377227
orf19.7380	-4.20291	1.33592e-05	-0.351233	NA	3.46142	0.000461307	-0.390261	0.648765
RHR2	-3.58141	3.70032e-09	-0.356937	NA	0.76814	0.375596	-2.45633	2.83801e-05
MNN12	-4.27868	1.47086e-219	-0.339472	0.0107601	2.49857	1.40791e-70	-1.44064	4.4915e-36
orf19.6919	-1.26093	NA	1.2527	NA	2.09691	0.622524	-0.416713	NA
orf19.2210	-2.90978	0	0.187701	0.0458298	1.58477	2.18903e-89	-1.5127	1.47118e-91
PLB5	-3.54854	0	0.364429	1.63357e-05	3.57677	0	-0.336204	2.68083e-05
HGC1	-3.86012	0	0.0379506	0.751265	3.76733	0	-0.130739	0.0841429
ICL1	-1.63617	6.89618e-07	-0.414495	0.387714	0.144448	0.748143	-1.07723	0.00176802
SOU2	-3.47606	0.0830752	0.647084	NA	1.17548	0.661156	-2.94767	0.121864
IHD2	-4.18574	0	0.0607649	0.645153	4.37179	0	0.125294	0.171196
orf19.6816	-4.08239	0.00318823	0.273675	NA	2.35206	0.135171	-2.004	0.0470528
PCK1	-3.37829	6.07187e-26	-0.0218333	0.969278	1.36159	0.000134932	-1.99487	4.17774e-11
IFA14	-4.60995	0.0140743	-0.503597	NA	2.19554	0.364498	-1.91082	0.357599
ADAEC	-3.84684	4.60199e-161	0.0280642	0.898802	-1.80773	1.356e-12	-5.68264	1.40113e-135
CTR1	-3.02701	4.88538e-06	0.236323	0.847615	2.21665	0.00104911	-1.04668	0.162785
STF2	-3.39594	2.17252e-19	0.354883	0.560967	-0.188724	0.725867	-3.93955	2.79668e-25
orf19.6608	-2.54674	5.56426e-13	0.311978	0.52902	2.18656	1.03204e-09	-0.672162	0.0592022
MNN22	-0.78329	2.42783e-08	0.124569	0.578832	0.870494	3.24133e-10	-0.0373653	0.853493
orf19.1409.2	-3.54379	0	-0.0391697	0.813998	2.83022	2.85937e-212	-0.674402	1.92013e-14
orf19.2962	-0.774014	0.407297	-0.54198	NA	0.966263	0.254578	0.734229	0.442276
SOD6	-0.521931	1.02289e-07	0.0902173	0.566314	0.809171	9.1416e-18	0.197022	0.0709911
GPX2	-2.48472	6.50971e-226	0.490143	1.66631e-09	1.69766	1.28368e-103	-1.27721	1.45883e-64
ADH1	-2.0072	1.99029e-27	0.191421	0.523033	0.342353	0.110455	-1.85627	1.98315e-23
orf19.3982	-2.46976	2.48234e-08	-0.412872	0.509256	-0.19614	0.783969	-2.25302	3.42101e-06
orf19.7455	-1.1574	NA	1.01064	NA	-0.641188	0.883869	-2.80923	NA
RFX2	-2.85284	4.68636e-115	0.249833	0.0690797	3.38971	2.9261e-165	0.287034	0.0143585
MNN24	-2.81676	5.5808e-218	0.0700206	0.63208	0.830169	4.13027e-18	-2.05661	2.80952e-121
HGT12	-6.30565	3.20027e-05	-0.971554	NA	2.18371	0.314739	-3.15039	0.038826
orf19.7085	-1.49005	1.75029e-07	0.472014	0.182208	-1.34785	0.000291456	-3.30992	1.51865e-22
MLS1	-1.48167	7.95303e-09	-0.761951	0.0121447	-0.0366872	0.928646	-0.756408	0.00623596
orf19.3499	-4.35149	3.19603e-08	-1.11529	NA	1.07388	0.32545	-2.16231	0.00401356
orf19.1964	-1.79374	2.27575e-11	0.716787	0.0109742	2.34201	1.79311e-19	-0.168518	0.58854
CBP1	-2.20914	5.50543e-18	0.00776221	0.984547	3.48292	3.34145e-45	1.26602	8.40878e-08
YHB1	-2.17106	2.49887e-05	1.06513	0.0915924	0.497044	0.428971	-2.73915	5.71877e-08
RNR22	-1.27809	0.000362241	0.871904	0.0349277	-1.23769	0.00116627	-3.38768	1.0728e-21
SHA3	-2.42928	5.60919e-09	0.788059	0.0628428	0.131452	0.854518	-3.08589	1.76618e-13
DCK1	-1.3849	4.25479e-28	0.210563	0.212917	1.46574	1.59559e-31	-0.129715	0.404617
PGA45	-0.376644	0.71186	1.47496	0.0946443	0.262925	0.785872	-1.58868	0.0382812
LYS143	-1.58899	3.78622e-44	0.422911	0.000646873	0.425994	0.000910976	-1.58591	1.50613e-44
orf19.2457	-2.09883	8.65352e-193	0.22526	0.00508873	1.73566	1.11461e-129	-0.588429	1.28671e-17
orf19.715	-2.08088	1.31307e-58	-0.112714	0.58337	0.321698	0.0379379	-1.64646	4.82282e-36
EAP1	-0.384553	0.000884568	0.757328	2.27752e-11	0.482434	1.62973e-05	-0.659447	1.20324e-09
orf19.915	-1.17084	3.54451e-25	0.258758	0.0604241	0.169092	0.24421	-1.2605	6.43212e-28
orf19.1189	-1.19693	2.63272e-40	-0.00789808	0.965467	0.78543	1.5386e-17	-0.403606	2.21053e-05
SIR2	-2.33571	1.0445e-137	-0.168735	0.177501	0.760928	2.38286e-14	-1.40604	3.41013e-51
GAP4	-0.946049	8.50849e-58	-0.259315	0.000126037	0.766608	3.81615e-38	0.0798745	0.285811
orf19.2529.1	-0.672361	0.00170918	0.618768	0.00872558	-0.2978	0.225322	-1.58893	7.94786e-15
MRF1	-1.18877	3.57054e-45	0.349225	0.0001854	2.4439	1.33239e-197	0.905904	1.69963e-29
FGR41	2.39524	3.10546e-149	0.701834	1.41206e-11	-1.25276	7.5418e-44	0.440648	8.83429e-06
XOG1	0.787169	4.47733e-27	-0.433479	4.20437e-07	-3.47461	0	-2.25397	7.97288e-125
ROA1	1.43175	1.96621e-30	-0.138163	0.500031	-1.1495	4.48683e-20	0.420417	0.00247321
GIT2	1.39676	5.82664e-89	0.1042	0.335103	-0.0497852	0.594956	1.24277	2.37453e-69
OFI1	0.954828	0.130585	0.890971	NA	0.361852	0.576936	0.425709	0.531378
orf19.1584	1.5603	1.09725e-27	0.402364	0.0369892	0.348429	0.0162492	1.50637	7.28557e-26
orf19.2049	1.08356	0.311883	-0.0817182	NA	-0.225597	0.848433	0.939683	0.426082
PGA34	2.04838	2.84168e-179	0.788217	4.30452e-24	-0.430467	1.90714e-09	0.829697	3.52959e-30
HGT20	1.13154	9.33465e-17	-0.849903	1.66966e-06	-1.10967	3.17387e-16	0.871773	1.85952e-07
orf19.7502	1.95768	2.09231e-31	0.118131	0.726974	-1.73999	1.19616e-25	0.0995538	0.700098
RNR3	2.2408	1.82236e-61	0.841959	1.30747e-07	0.0874768	0.596975	1.48632	6.02266e-29
CWP419	3.21771	7.36159e-09	0.82128	NA	-4.63962	7.99038e-11	-2.24319	0.00681756
orf19.7336	2.1247	NA	0.364396	NA	-2.10324	0.484967	-0.342931	NA
orf19.6805	1.47044	0.103513	0.0908856	NA	-0.26713	0.788855	1.11242	0.267718
PGA31	2.97851	4.39336e-11	0.0888576	NA	-1.91899	3.07748e-06	0.970663	0.0915308
MNN41	2.32217	0.0020459	1.00915	NA	0.204992	0.808445	1.51801	0.0411248
orf19.5069	2.21172	9.89613e-66	1.63065	3.92971e-31	1.90566	3.02628e-82	2.48673	1.11789e-118
orf19.3048	2.49219	1.54544e-51	-0.231302	0.398134	-2.39684	6.02888e-48	0.326645	0.125411
SCW11	4.01016	1.65606e-102	1.99874	2.30268e-24	-2.332	6.05861e-36	-0.320576	0.15681
orf19.938	2.9139	0.00281248	-0.196754	NA	-0.901429	0.315066	2.20922	0.0598331
BUD20	2.15267	NA	1.32616	NA	-2.13123	NA	-1.30472	NA
DAG7	3.76764	5.44851e-57	-0.640656	0.0439497	-2.94765	6.5158e-36	1.46065	1.28113e-08
orf19.5933	5.0349	0.00535132	0	NA	-0.729529	0.659621	3.94098	0.0400903
orf19.2638.1	3.83259	6.30902e-09	-1.63517	NA	-0.125314	0.830529	5.34245	4.6622e-06
RBE1	7.78972	2.08906e-09	-0.597402	NA	-5.5537	5.19624e-13	2.83342	0.0897298

## Sheet: 4
Down in "efg1DD+UME6oe vs efg1DD"	Up in "efg1DD+UME6oe vs efg1DD"	Down in "efg1DD+UME6oe vs UME6oe"	Up in "efg1DD+UME6oe vs UME6oe"
+	+	+	+
Efg1 core-target	Efg1 core-target	Efg1 core-target	Efg1 core-target
RBE1	PCK1	SAP6	GIT2
CWP419	DCK1	SAP5	CBP1
XOG1	orf19.2210	orf19.3337	UME6
DAG7	GPX2	RBT4	DAG7
orf19.3048	orf19.2457	IRF1	RNR3
SCW11	HYR1	orf19.1691	orf19.1584
PGA31	orf19.5069	HYR1	MNN41
ADAEC	orf19.6608	ADAEC	orf19.5069
orf19.7502	CTR1	PGA23	orf19.5933
IRF1	orf19.1964	ALS1	orf19.2638.1
orf19.7085	MRF1	orf19.7056	RBT1
FGR41	MNN12	GLX3
RNR22	orf19.1409.2	HSP21
ROA1	SAP5	MAL31
HGT20	BRG1	orf19.344
	RFX2	STF2
	orf19.7380	orf19.4450.1
	CBP1	CUP1
	PLB5	RNR22
	HGC1	ALS3
	orf19.344	orf19.7085
	RBT4	ADH5
	ATO1	HGT12
	RSN1	orf19.3643
	ALS3	SHA3
	IHD2	FRE30
	RCT1	YHB1
	IHD1	DEF1
	FAV2	CFL11
	orf19.6864	RHR2
	FAV1	XOG1
	orf19.4936.1	orf19.3982
	DEF1	CWP419
	CFL11	orf19.5431
	UME6	IHD1
	RBT1	orf19.3499
	HWP1	FAV1
		MNN24
		orf19.6816
		PCK1
		ADH1
		ATO1
		orf19.715
		orf19.2529.1
		PGA45
		LYS143
		orf19.4936.1
		orf19.2210
		MNN12
		SIR2
		GPX2
		BRG1
		orf19.915
		ICL1

## Sheet: 5
	efg1ΔΔ vs WT		RBT5-UME6 vs WT		efg1ΔΔRBT5-UME6 vs efg1ΔΔ		efg1ΔΔRBT5-UME6 vs RBT5-UME6
Gene	Log2FC	padj	Log2FC	padj	Log2FC	padj	Log2FC	padj
HWP1	-14.2041	0	0.213278	0.0544624	13.6584	0	-0.759007	4.96664e-18
ECE1	-13.9203	4.19506e-28	0.526725	0.361408	8.1888	2.99056e-10	-6.25825	6.56737e-55
SAP6	-12.6711	0	-0.687209	0.0374944	0.496812	0.21631	-11.4871	0
SAP4	-12.3294	2.56082e-75	-1.38397	0.0453098	0.393515	0.721377	-10.5519	4.80595e-56
RBT4	-11.9977	0	-0.504161	0.0080588	3.80588	5.34138e-41	-7.68761	0
SAP5	-11.9092	1.50793e-22	-0.724099	9.22977e-07	3.20578	0.0296591	-7.97932	4.30507e-50
RBR1	-8.16641	1.15783e-70	-1.16192	0.00246453	2.37351	3.57221e-06	-4.63098	4.80784e-37
FAV1	-7.8958	1.67729e-130	-0.674138	5.8887e-05	5.07879	6.42177e-53	-2.14288	3.8334e-42
HYR1	-7.2149	0	0.816786	7.4297e-21	1.81663	1.50691e-53	-6.21506	0
ALS3	-6.99743	0	0.476141	4.06213e-11	4.11633	0	-3.35724	0
IHD1	-6.83733	0	0.151912	0.19819	4.80407	0	-2.18518	2.62138e-152
HGT12	-6.30565	3.20027e-05	-0.971554	NA	2.18371	0.314739	-3.15039	0.038826
orf19.3337	-6.14612	8.11928e-27	0.530425	0.379926	-1.02773	0.344301	-7.70428	2.71194e-23
PGA23	-6.08258	0	-0.899038	9.23001e-18	0.137476	0.409792	-5.04606	0
orf19.4936.1	-6.05209	2.29757e-258	0.559431	1.643e-05	5.07885	6.2541e-180	-1.53266	7.04161e-39
AAF1	-6.0399	1.36274e-05	0.0798902	NA	1.21549	0.586584	-4.9043	8.62781e-05
RCT1	-5.4828	2.71715e-48	-0.241475	0.695034	4.43052	1.2963e-31	-0.810799	0.0377227
IRF1	-5.42977	2.31064e-60	0.005355	0.984308	-1.67717	0.0286541	-7.11229	2.9175e-30
UME6	-4.82299	0	0.838354	4.90059e-24	7.0002	0	1.33886	9.18455e-65
HGT6	-4.69985	0	0.265459	0.00810437	4.23558	0	-0.729737	3.76583e-18
orf19.7380	-4.20291	1.33592e-05	-0.351233	NA	3.46142	0.000461307	-0.390261	0.648765
BRG1	-4.20051	3.59895e-97	0.356697	0.197298	3.28294	2.69143e-59	-1.27427	3.98364e-10
GCA1	-3.95673	4.15073e-137	-0.352439	0.053067	0.21687	0.334816	-3.38743	3.25762e-97
orf19.7056	-3.93487	0.067621	0.891007	NA	0	1	-4.50527	0.0300712
HGC1	-3.86012	0	0.0379506	0.751265	3.76733	0	-0.130739	0.0841429
orf19.33	-3.61891	4.75382e-92	0.0710696	0.813449	0.263035	0.292702	-3.42694	8.02783e-81
PLB5	-3.54854	0	0.364429	1.63357e-05	3.57677	0	-0.336204	2.68083e-05
orf19.6888	-3.45637	1.68727e-54	0.0962224	0.74603	2.59337	1.81203e-29	-0.95922	4.45536e-08
WOR3	-3.40562	0	0.0870959	0.466491	1.96383	2.23313e-111	-1.52888	3.14503e-86
ECM331	-3.2333	4.61307e-288	-0.134726	0.283664	1.72252	1.42349e-79	-1.37606	2.10166e-56
RAS2	-3.11374	NA	-0.00724161	NA	0	1	-2.78589	NA
orf19.7567	-3.05423	2.49302e-09	-0.638934	NA	1.02787	0.104833	-1.38743	0.00757661
CTR1	-3.02701	4.88538e-06	0.236323	0.847615	2.21665	0.00104911	-1.04668	0.162785
orf19.2210	-2.90978	0	0.187701	0.0458298	1.58477	2.18903e-89	-1.5127	1.47118e-91
RFX2	-2.85284	4.68636e-115	0.249833	0.0690797	3.38971	2.9261e-165	0.287034	0.0143585
orf19.2175	-2.81093	0	-0.262037	0.000638749	2.31702	4.62467e-237	-0.231867	0.00146006
OPT4	-2.61735	1.41943e-20	-0.452489	0.250655	1.3638	3.23988e-06	-0.801059	0.00904594
GPX2	-2.48472	6.50971e-226	0.490143	1.66631e-09	1.69766	1.28368e-103	-1.27721	1.45883e-64
orf19.2638	-2.2639	3.70196e-42	-0.621819	0.000427857	0.770805	4.24783e-05	-0.871278	5.67907e-07
CBP1	-2.20914	5.50543e-18	0.00776221	0.984547	3.48292	3.34145e-45	1.26602	8.40878e-08
orf19.716	-2.19512	1.36999e-107	-0.527617	1.25582e-06	0.492957	5.56948e-06	-1.17455	1.02869e-30
orf19.6968	-2.19031	3.10262e-09	-0.180898	0.751218	3.08842	1.4821e-18	1.07901	0.000704209
orf19.6148	-2.18051	1.90665e-35	0.834148	1.95341e-05	4.87386	2.24703e-175	1.8592	2.44663e-26
CDR11	-2.11584	3.2628e-06	0.482488	0.398387	1.10249	0.0303888	-1.49584	0.000498102
SKN7	-2.10354	0.000197599	-0.248872	NA	1.92588	0.000718945	0.0712075	0.924302
orf19.715	-2.08088	1.31307e-58	-0.112714	0.58337	0.321698	0.0379379	-1.64646	4.82282e-36
IRO1	-2.07937	5.52574e-19	-0.0825054	0.841691	2.94998	5.18747e-39	0.953117	8.91684e-06
CPP1	-2.01662	1.31581e-91	-0.484423	1.21554e-05	0.0039347	0.981481	-1.52827	4.18314e-51
MNN15	-1.97974	4.38984e-82	-0.0907724	0.572667	0.138651	0.330854	-1.75032	2.80622e-60
TUB1	-1.89983	0.00187939	-1.21674	0.101983	1.74389	0.00422331	1.06079	0.111851
SHE3	-1.84878	1.84639e-146	-0.060103	0.625132	1.74107	1.38537e-129	-0.0476082	0.634601
orf19.6978	-1.8466	0.390076	0.598277	NA	0.29937	0.9209	-2.14551	0.291379
NTH1	-1.75777	8.33706e-07	-0.154267	0.803804	2.18272	2.63629e-10	0.579214	0.123412
orf19.6579	-1.71405	0.0209594	0.202427	NA	2.31985	0.000761108	0.403376	0.614844
CEK1	-1.59257	5.96366e-115	-0.630142	5.98604e-18	1.33741	3.07675e-80	0.37499	3.2576e-07
PHM7	-1.57715	5.57904e-170	0.313112	6.7371e-07	1.3365	1.09227e-121	-0.553765	7.73648e-22
KAR9	-1.54027	4.57771e-20	-0.670596	0.000378985	0.61574	0.000851999	-0.253939	0.228187
RHO2	-1.49725	2.25096e-30	-0.0447838	0.85339	1.9382	8.91342e-52	0.485729	0.00018692
orf19.5288.1	-1.49585	9.82507e-60	-0.119995	0.385222	-0.146771	0.203757	-1.52262	1.07878e-58
orf19.1654	-1.49469	5.40737e-79	0.116965	0.315002	2.04725	1.90833e-149	0.435588	7.78821e-08
PCL1	-1.4929	2.02811e-31	-0.935614	1.12443e-11	-0.762194	5.99807e-08	-1.31948	1.17554e-21
orf19.1239	-1.46301	0.0137451	0.104902	0.920959	1.78602	0.00165215	0.21811	0.769313
SRR1	-1.44422	1.00945e-34	0.118812	0.521969	0.750588	9.66572e-10	-0.81244	9.96971e-12
orf19.1440.2	-1.41286	5.19516e-17	-0.102605	0.727455	-0.443781	0.0325103	-1.75404	4.74627e-22
DCK1	-1.3849	4.25479e-28	0.210563	0.212917	1.46574	1.59559e-31	-0.129715	0.404617
RSR1	-1.33767	1.81018e-75	-0.102275	0.345488	1.40695	1.68377e-83	0.171557	0.0376618
orf19.1562	-1.30612	2.37922e-53	0.153536	0.180587	-0.103172	0.369286	-1.56282	5.09485e-71
GFA1	-1.29549	4.20421e-96	-0.0645519	0.527681	0.81529	3.89684e-38	-0.415652	1.34833e-10
orf19.2726	-1.2462	4.2071e-20	0.304014	0.0640263	0.322798	0.0435005	-1.22741	2.41376e-19
IST2	-1.24287	1.17987e-35	-0.116123	0.457579	1.18971	1.01173e-32	0.0629637	0.650907
IPT1	-1.17923	4.6133e-47	-0.181847	0.0895803	0.450682	1.75238e-07	-0.546698	1.37776e-10
ZFU2	-1.17342	0.0560622	-0.189424	NA	1.46972	0.0105379	0.48572	0.47091
STE50	-1.14334	4.3432e-43	-0.158394	0.164956	0.165039	0.0924335	-0.819908	6.22946e-22
orf19.2274	-1.10163	1.59279e-25	0.0880849	0.612026	2.12051	1.6536e-98	0.930791	7.79603e-21
HUT1	-1.09902	0.121123	-0.126084	NA	1.28771	0.0538083	0.314773	0.698752
PHR1	-1.09391	4.12979e-67	0.142913	0.0874092	1.77129	3.89978e-175	0.534473	1.57369e-16
orf19.3264.1	-1.05543	1.83645e-20	0.142512	0.401637	1.66911	5.28e-51	0.47117	5.57287e-05
orf19.1139	-0.933419	2.45324e-58	0.0632642	0.49604	0.682118	3.76686e-31	-0.314565	2.24945e-07
orf19.3712	-0.928003	0.106344	0.0779167	NA	0.939584	0.0930233	-0.0663365	0.930591
VAM3	-0.923866	5.15255e-16	0.394356	0.00209624	1.48897	1.35226e-41	0.170748	0.193844
SAC7	-0.914537	0.257435	0.700094	NA	1.88536	0.00439752	0.270732	0.736907
orf19.2506	-0.913232	2.92844e-22	-0.0569994	0.739768	1.07994	4.3732e-31	0.223711	0.0337458
ERG10	-0.909822	1.91798e-18	0.0836876	0.637488	0.374938	0.000620475	-0.618572	5.91711e-09
MNN47	-0.904054	1.79721e-20	0.138914	0.328207	1.44969	6.57756e-53	0.406723	4.33102e-05
orf19.6456	-0.866354	1.06735e-13	-0.143145	0.416986	0.41312	0.00084056	-0.310089	0.0168718
IQG1	-0.853696	0.00310909	0.0754721	0.884657	1.75793	1.58815e-11	0.828764	0.00251425
orf19.6705	-0.842554	1.38758e-25	-0.0627174	0.656711	1.14403	1.01193e-46	0.364191	1.65886e-05
SFH5	-0.838099	7.46179e-31	0.297222	0.000306899	1.99958	4.91336e-177	0.864258	4.64586e-34
SGA1	-0.836831	0.443878	-0.368473	NA	0.837315	0.418225	0.368957	0.758945
TLO4	-0.824141	0.0193674	-0.152956	0.801824	0.98036	0.00362686	0.309175	0.451759
PGA54	-0.818753	8.22283e-19	0.0415208	0.814693	1.70819	1.04262e-79	0.847921	4.28353e-20
BEM2	-0.815196	0.00109128	0.149309	0.719871	1.47642	1.30449e-10	0.511918	0.04242
orf19.1666	-0.811575	5.15347e-11	-0.275607	0.0825551	0.850553	4.21091e-12	0.314585	0.0217516
PMC1	-0.806361	0.00453411	-0.0952048	0.85143	0.165107	0.655776	-0.546049	0.0847672
MNN45	-0.767176	4.16356e-07	-0.342912	0.0730699	-0.0187823	0.938735	-0.443047	0.00922637
orf19.7110	-0.726085	0.465793	-0.0706573	NA	1.16756	0.169137	0.512134	0.606126
orf19.3475	-0.684668	1.57213e-31	0.18364	0.00997061	1.13559	1.0952e-85	0.267285	1.55149e-05
TUB2	-0.680061	3.29288e-22	-0.00502372	0.971591	1.61945	3.49844e-125	0.944409	7.40332e-43
SCS7	-0.667467	0.0104306	0.180361	0.659755	0.739521	0.00350788	-0.108306	0.746381
PTP1	-0.648133	0.000131087	0.139017	0.603074	1.00116	4.25964e-10	0.214006	0.270526
orf19.6476	-0.632149	2.49411e-14	-0.221586	0.0314999	0.680118	1.52399e-16	0.269555	0.00267759
SUN41	-0.631093	3.89076e-34	0.0911844	0.213514	1.09672	7.87813e-102	0.374447	1.68535e-12
orf19.4521	-0.623355	0.00406016	-0.278333	0.363528	0.337563	0.156417	-0.007459	0.980859
SFL2	-0.61788	1.68465e-09	0.246221	0.0510477	-0.789218	6.03463e-13	-1.65332	2.05351e-54
orf19.3751	-0.572065	3.39627e-12	0.273605	0.00413215	0.851313	3.1598e-26	0.0056436	0.962629
SNG3	-0.5698	2.54775e-10	0.323167	0.00144473	0.544773	1.4465e-09	-0.348194	0.000187346
TOS1	-0.568937	3.17343e-24	0.0692968	0.421412	1.11397	5.32377e-91	0.475741	4.13553e-17
MDG1	-0.552336	8.9932e-05	0.330099	0.049368	1.44449	7.85319e-29	0.562059	3.63398e-05
IFA21	-0.484651	2.3699e-09	-0.261122	0.00712304	-0.010157	0.937626	-0.233686	0.0106072
AGM1	-0.479658	0.178358	-0.344509	0.475429	1.05175	0.000457497	0.916596	0.00498442
MSB1	-0.470331	3.55265e-07	0.441219	6.82871e-06	0.864675	1.41579e-22	-0.046875	0.707154
orf19.5019	-0.451304	0.169711	0.480664	0.194248	1.49304	1.47213e-08	0.561074	0.0528108
orf19.2253	-0.441101	0.0262446	0.108989	0.738444	-0.508628	0.013748	-1.05872	6.31572e-08
WBP1	-0.414028	1.65898e-06	-0.115589	0.360731	0.582533	3.56573e-12	0.284093	0.00174035
orf19.2852	-0.393561	0.60435	-0.179453	NA	0.367543	0.607324	0.153435	0.851908
YPS7	-0.386717	0.581852	-0.584534	NA	1.52023	0.00263064	1.71805	0.00193996
orf19.5799	-0.379197	0.139294	0.308074	0.334214	0.987375	8.8868e-06	0.300103	0.258285
orf19.6264.3	-0.374999	0.180857	-0.571537	0.0740573	0.613434	0.0137691	0.809971	0.00232599
KCH1	-0.36758	0.591558	0.309793	NA	0.97053	0.0678119	0.293157	0.651575
FGR16	-0.327387	0.696809	-0.252846	NA	0.286173	0.713819	0.211632	0.807899
orf19.6414	-0.326907	0.441422	0.387773	0.425511	1.29806	5.03609e-05	0.583384	0.104603
ECM33	-0.321327	1.66479e-05	0.18049	0.0450128	0.844855	5.04e-33	0.343039	3.91811e-06
PCL2	-0.307468	0.0472419	-0.806216	1.88107e-07	-0.0868942	0.639993	0.411853	0.00909709
MP65	-0.294771	1.20991e-06	-0.0795512	0.365839	1.012	2.26799e-69	0.796782	5.16679e-43
orf19.2512	-0.266808	0.0462708	-0.0122658	0.959695	-0.671084	1.38664e-07	-0.925627	5.31209e-13
PGA52	-0.258385	0.0072144	0.194038	0.0900259	-0.208664	0.0330592	-0.661087	1.38216e-13
HGT4	-0.242324	0.673644	-0.170961	NA	1.05227	0.00898546	0.980904	0.026059
CHS1	-0.186727	0.0130136	-0.0925563	0.370543	0.587614	3.6489e-18	0.493444	1.20212e-12
PMT1	-0.179086	0.0205336	-0.279071	0.000618419	0.745507	4.53007e-28	0.845493	1.03747e-33
orf19.7079	-0.168767	0.748197	0.265141	0.660609	0.707622	0.0567085	0.273714	0.543783
VPS21	-0.159841	0.0458875	-0.0630033	0.599653	0.629215	1.29841e-19	0.532377	1.07715e-13
KRE9	-0.127316	0.0787609	0.0302591	0.803487	0.198531	0.00299783	0.0409559	0.639397
USO6	-0.0923475	0.797994	0.239114	0.509662	1.1532	1.06152e-07	0.821743	0.000369029
orf19.6282	-0.06322	0.883284	0.0822342	0.86867	1.57503	4.29571e-10	1.42958	2.46111e-08
OP4	-0.0626144	0.955594	-0.226927	0.860042	1.76304	0.0134727	1.92736	0.00731849
IFU5	-0.0273409	0.880164	-0.241292	0.0806353	0.497222	4.84654e-06	0.711173	5.23639e-11
MCM1	-0.021461	0.983457	0.937152	0.253636	-0.648645	0.372721	-1.60726	0.0124142
SLC1	-0.0204842	0.87152	0.0120768	0.940872	-0.230374	0.00395407	-0.262935	0.00117214
orf19.2460	0.0318237	0.948685	0.253349	0.608072	1.1456	7.36197e-05	0.92407	0.00251848
orf19.3713	0.0913523	0.876205	0.283296	0.636187	-1.22655	0.0021572	-1.41849	0.000513202
AXL2	0.157356	0.00578506	-0.0307441	0.756238	0.839524	1.17217e-62	1.02762	1.32693e-88
RPL3	0.221034	0.00361597	0.15226	0.0967416	-0.300245	3.80482e-05	-0.23147	0.00227349
orf19.6416	0.257082	0.825773	-0.217997	NA	0.982351	0.210858	1.45743	0.0869762
orf19.2401	0.266607	0.0757178	0.179115	0.3757	0.272823	0.0548434	0.360314	0.0133106
CDC13	0.332245	0.755929	-0.97297	NA	0.784241	0.327468	2.08946	0.015511
COE2	0.559681	0.542732	0.0188728	NA	-0.198567	0.834739	0.342242	0.732618
orf19.4919	0.734569	0.235904	0.447646	NA	-0.500912	0.420106	-0.213988	0.777424
snR13	0.734769	0.716811	-0.380109	NA	-0.0413297	0.983576	1.07355	0.592198
HSP90	0.751544	0.116454	-0.0285193	0.971712	-0.412197	0.420554	0.367866	0.492666
orf19.5390	NA	NA	NA	NA	NA	NA	NA	NA
orf19.7608	NA	NA	NA	NA	NA	NA	NA	NA
