# Supplementary material for: Ume6 protein complexes connect morphogenesis, adherence and hypoxic genes to shape Candida albicans biofilm architecture
Source: Nat Microbiol. 2025 Aug 21;10(9):2231–44. doi: 10.1038/s41564-025-02094-5 (PMC12408341; doi:10.1038/s41564-025-02094-5)
Supplement: Supplementary file 4 — ChIP-seq results. [file 41564_2025_2094_MOESM4_ESM.xlsx]

## Sheet: Legend
	Description
Tab 1	ChIP-seq data (consensus peaks among replicates) for Ume6-HA tagged strain in SC5314
Tab 2	ChIP-seq data (consensus peaks among replicates) for Ume6-HA tagged strain in P75010
Tab 3	ChIP-seq data (consensus peaks among replicates) for Ume6-HA tagged strain in SC5314 WT
Tab 4	ChIP-seq data (consensus peaks among replicates) for Ume6-HA tagged strain in SC5314 efg1DD mutant
Tab 5	ChIP-seq data (consensus peaks among replicates) for overexpression of Ume6-HA tagged strain in SC5314 WT
Tab 6	ChIP-seq data (consensus peaks among replicates) for overexpression of Ume6-HA tagged strain in SC5314 efg1DD mutant
Tab 7	Differentially Ume6-bound genes in efg1DD + RBT5-UME6-HA compared to RBT5-UME6-HA
Tab 8	Gene list of Ume6-bound, Efg1-bound (Do et al., 2022), Efg1 core target (Do et al., 2022), and hypha-associated genes (Cravener et al., 2023).
Tab 9	Results for pearson coefficients analysis
References
Do E, Cravener MV, Huang MY, May G, McManus CJ, Mitchell AP. Collaboration between Antagonistic Cell Type Regulators Governs Natural Variation in the Candida albicans Biofilm and Hyphal Gene Expression Network. mBio. 2022 Oct 26;13(5):e0193722. doi: 10.1128/mbio.01937-22. Epub 2022 Aug 22. PMID: 35993746; PMCID: PMC9600859.
Cravener MV, Do E, May G, Zarnowski R, Andes DR, McManus CJ, Mitchell AP. Reinforcement amid genetic diversity in the Candida albicans biofilm regulatory network. PLoS Pathog. 2023 Jan 25;19(1):e1011109. doi: 10.1371/journal.ppat.1011109. PMID: 36696432; PMCID: PMC9901766.

## Sheet: 1
Chromosome	Start	Stop	Name	Score	Strand	ID
Ca19-mtDNA	13352	13750	MSPC_Peak_77;ID=CaalfMp06;Name=CaalfMp06;Peak-12895-13635;Summit-13641-13642;Dist--7	77	-	CaalfMp06
Ca19-mtDNA	27181	28003	MSPC_Peak_70;ID=CaalfMr17;Name=CaalfMr17;Peak-27022-28483;Summit-27815-27816;Dist-0	56	+	CaalfMr17
Ca21chr1_C_albicans_SC5314	146	425	MSPC_Peak_1292;ID=orf19.6115;Name=orf19.6115;Peak-4059-4397;Summit-317-318;Dist--3742	61.829	+	orf19.6115
Ca21chr1_C_albicans_SC5314	146	425	MSPC_Peak_1292;ID=orf19.6115;Name=orf19.6115;Peak-4059-4397;Summit-412-413;Dist--3647	61.829	+	orf19.6115
Ca21chr1_C_albicans_SC5314	5117	5844	MSPC_Peak_1291;ID=orf19.6114;Name=orf19.6114;Peak-4409-4720;Summit-5373-5374;Dist--654	296.615	-	orf19.6114
Ca21chr1_C_albicans_SC5314	5117	5844	MSPC_Peak_1291;ID=orf19.6114;Name=orf19.6114;Peak-4409-4720;Summit-5401-5409;Dist--682	296.615	-	orf19.6114
Ca21chr1_C_albicans_SC5314	10883	11212	MSPC_Peak_1290;ID=orf19.6112;Name=orf19.6112;Peak-10718-11485;Summit-11193-11194;Dist-0	31	+	orf19.6112
Ca21chr1_C_albicans_SC5314	32308	32756	MSPC_Peak_1289;ID=orf19.6085;Name=orf19.6085;Peak-31842-32444;Summit-32369-32370;Dist-0	32	+	orf19.6085
Ca21chr1_C_albicans_SC5314	34249	35329	MSPC_Peak_1288;ID=orf19.6082;Name=orf19.6082;Peak-34525-35679;Summit-35012-35013;Dist-0	78	-	orf19.6082
Ca21chr1_C_albicans_SC5314	37028	37948	MSPC_Peak_1287;ID=orf19.6081;Name=orf19.6081;Peak-37852-39486;Summit-37326-37327;Dist--526	inf	+	orf19.6081
Ca21chr1_C_albicans_SC5314	37028	37948	MSPC_Peak_1287;ID=orf19.6081;Name=orf19.6081;Peak-37852-39486;Summit-37413-37414;Dist--439	inf	+	orf19.6081
Ca21chr1_C_albicans_SC5314	37028	37948	MSPC_Peak_1287;ID=orf19.6081;Name=orf19.6081;Peak-37852-39486;Summit-37454-37455;Dist--398	inf	+	orf19.6081
Ca21chr1_C_albicans_SC5314	50593	51304	MSPC_Peak_1286;ID=orf19.6073;Name=orf19.6073;Peak-50807-51682;Summit-50866-50867;Dist-0	65	-	orf19.6073
Ca21chr1_C_albicans_SC5314	54929	55369	MSPC_Peak_1285;ID=orf19.6071;Name=orf19.6071;Peak-54838-57075;Summit-55156-55157;Dist-0	19	-	orf19.6071
Ca21chr1_C_albicans_SC5314	62309	62641	MSPC_Peak_1284;ID=orf19.6070;Name=orf19.6070;Peak-59350-62553;Summit-62369-62370;Dist-0	40	+	orf19.6070
Ca21chr1_C_albicans_SC5314	102971	103440	MSPC_Peak_1283;ID=orf19.6045;Name=orf19.6045;Peak-101752-103524;Summit-103376-103377;Dist-0	57	+	orf19.6045
Ca21chr1_C_albicans_SC5314	106967	107202	MSPC_Peak_1282;ID=orf19.6041;Name=orf19.6041;Peak-107126-111028;Summit-107176-107177;Dist-0	33	-	orf19.6041
Ca21chr1_C_albicans_SC5314	118068	119333	MSPC_Peak_1281;ID=orf19.6037;Name=orf19.6037;Peak-117320-119443;Summit-118601-118602;Dist-0	68	+	orf19.6037
Ca21chr1_C_albicans_SC5314	124936	125214	MSPC_Peak_1280;ID=orf19.6034;Name=orf19.6034;Peak-123869-125597;Summit-124937-124938;Dist-0	14	-	orf19.6034
Ca21chr1_C_albicans_SC5314	126429	126683	MSPC_Peak_1279;ID=tP(UGG)3;Name=tP(UGG)3;Peak-126521-126612;Summit-126564-126569;Dist-0	inf	+	tP(UGG)3
Ca21chr1_C_albicans_SC5314	140094	141069	MSPC_Peak_1278;ID=orf19.6028;Name=orf19.6028;Peak-138579-140936;Summit-140318-140319;Dist-0	15	-	orf19.6028
Ca21chr1_C_albicans_SC5314	141505	142357	MSPC_Peak_1277;ID=orf19.6028;Name=orf19.6028;Peak-138579-140936;Summit-142182-142187;Dist--1247	inf	-	orf19.6028
Ca21chr1_C_albicans_SC5314	142649	143513	MSPC_Peak_1276;ID=orf19.6028;Name=orf19.6028;Peak-138579-140936;Summit-142962-142964;Dist--2027	inf	-	orf19.6028
Ca21chr1_C_albicans_SC5314	144432	145950	MSPC_Peak_1275;ID=orf19.6028;Name=orf19.6028;Peak-138579-140936;Summit-145280-145298;Dist--4345	inf	-	orf19.6028
Ca21chr1_C_albicans_SC5314	146314	148344	MSPC_Peak_1274;ID=orf19.6027;Name=orf19.6027;Peak-150614-151714;Summit-147383-147402;Dist--3213	inf	+	orf19.6027
Ca21chr1_C_albicans_SC5314	146314	148344	MSPC_Peak_1274;ID=orf19.6027;Name=orf19.6027;Peak-150614-151714;Summit-148100-148101;Dist--2514	inf	+	orf19.6027
Ca21chr1_C_albicans_SC5314	151782	152933	MSPC_Peak_1273;ID=orf19.6025;Name=orf19.6025;Peak-155448-156329;Summit-151997-152007;Dist--3442	inf	+	orf19.6025
Ca21chr1_C_albicans_SC5314	151782	152933	MSPC_Peak_1273;ID=orf19.6025;Name=orf19.6025;Peak-155448-156329;Summit-152043-152044;Dist--3405	inf	+	orf19.6025
Ca21chr1_C_albicans_SC5314	153433	154041	MSPC_Peak_1272;ID=orf19.6025;Name=orf19.6025;Peak-155448-156329;Summit-153869-153882;Dist--1567	299.157	+	orf19.6025
Ca21chr1_C_albicans_SC5314	191592	192073	MSPC_Peak_1271;ID=orf19.6010;Name=orf19.6010;Peak-191450-193411;Summit-191862-191863;Dist-0	21	-	orf19.6010
Ca21chr1_C_albicans_SC5314	204850	205148	MSPC_Peak_1270;ID=tA(AGC)4;Name=tA(AGC)4;Peak-204992-205064;Summit-205009-205033;Dist-0	inf	+	tA(AGC)4
Ca21chr1_C_albicans_SC5314	208528	208870	MSPC_Peak_1269;ID=orf19.3294;Name=orf19.3294;Peak-208292-208747;Summit-208730-208731;Dist-0	61	+	orf19.3294
Ca21chr1_C_albicans_SC5314	251318	252150	MSPC_Peak_1268;ID=orf19.3312;Name=orf19.3312;Peak-250112-251986;Summit-251872-251873;Dist-0	176	+	orf19.3312
Ca21chr1_C_albicans_SC5314	254013	254598	MSPC_Peak_1267;ID=orf19.3315;Name=orf19.3315;Peak-253167-254450;Summit-254352-254353;Dist-0	56	+	orf19.3315
Ca21chr1_C_albicans_SC5314	263236	264326	MSPC_Peak_1266;ID=orf19.3324;Name=orf19.3324;Peak-263488-264681;Summit-263586-263587;Dist-0	50	-	orf19.3324
Ca21chr1_C_albicans_SC5314	269032	270027	MSPC_Peak_1265;ID=orf19.3325.3;Name=orf19.3325.3;Peak-269382-270022;Summit-269403-269404;Dist-0	140	-	orf19.3325.3
Ca21chr1_C_albicans_SC5314	274996	275493	MSPC_Peak_1264;ID=orf19.3328;Name=orf19.3328;Peak-272385-274208;Summit-275185-275186;Dist--978	inf	-	orf19.3328
Ca21chr1_C_albicans_SC5314	274996	275493	MSPC_Peak_1264;ID=orf19.3328;Name=orf19.3328;Peak-272385-274208;Summit-275210-275231;Dist--1003	inf	-	orf19.3328
Ca21chr1_C_albicans_SC5314	284020	284438	MSPC_Peak_1263;ID=orf19.3331;Name=orf19.3331;Peak-282448-284148;Summit-284133-284134;Dist-0	40	+	orf19.3331
Ca21chr1_C_albicans_SC5314	289555	289845	MSPC_Peak_1262;ID=orf19.3334;Name=orf19.3334;Peak-289712-290461;Summit-289788-289789;Dist-0	66	-	orf19.3334
Ca21chr1_C_albicans_SC5314	293859	294108	MSPC_Peak_1261;ID=orf19.3336;Name=orf19.3336;Peak-296059-296517;Summit-293988-293989;Dist--2071	109	+	orf19.3336
Ca21chr1_C_albicans_SC5314	298659	299289	MSPC_Peak_1260;ID=orf19.3337;Name=orf19.3337;Peak-299627-301779;Summit-299013-299037;Dist--591	inf	+	orf19.3337
Ca21chr1_C_albicans_SC5314	301345	301772	MSPC_Peak_1259;ID=orf19.3337;Name=orf19.3337;Peak-299627-301779;Summit-301538-301539;Dist-0	33	+	orf19.3337
Ca21chr1_C_albicans_SC5314	302388	302977	MSPC_Peak_1258;ID=orf19.3342;Name=orf19.3342;Peak-309137-310987;Summit-302697-302698;Dist--6440	inf	+	orf19.3342
Ca21chr1_C_albicans_SC5314	302388	302977	MSPC_Peak_1258;ID=orf19.3342;Name=orf19.3342;Peak-309137-310987;Summit-302727-302735;Dist--6403	inf	+	orf19.3342
Ca21chr1_C_albicans_SC5314	317817	318068	MSPC_Peak_1257;ID=orf19.3347;Name=orf19.3347;Peak-317966-318487;Summit-317972-317973;Dist-0	23	-	orf19.3347
Ca21chr1_C_albicans_SC5314	331402	332345	MSPC_Peak_1256;ID=orf19.3353;Name=orf19.3353;Peak-331372-332055;Summit-332013-332014;Dist-0	43	+	orf19.3353
Ca21chr1_C_albicans_SC5314	332769	334276	MSPC_Peak_1255;ID=orf19.3354;Name=orf19.3354;Peak-332739-334096;Summit-333061-333083;Dist-0	inf	+	orf19.3354
Ca21chr1_C_albicans_SC5314	342687	343934	MSPC_Peak_1254;ID=orf19.3358;Name=orf19.3358;Peak-342949-343920;Summit-343118-343119;Dist-0	122.539	-	orf19.3358
Ca21chr1_C_albicans_SC5314	342687	343934	MSPC_Peak_1254;ID=orf19.3358;Name=orf19.3358;Peak-342949-343920;Summit-343645-343646;Dist-0	122.539	-	orf19.3358
Ca21chr1_C_albicans_SC5314	349401	349822	MSPC_Peak_1253;ID=orf19.3360;Name=orf19.3360;Peak-351115-353118;Summit-349594-349596;Dist--1520	inf	+	orf19.3360
Ca21chr1_C_albicans_SC5314	349401	349822	MSPC_Peak_1253;ID=orf19.3360;Name=orf19.3360;Peak-351115-353118;Summit-349620-349621;Dist--1495	inf	+	orf19.3360
Ca21chr1_C_albicans_SC5314	353179	353489	MSPC_Peak_1252;ID=tA(AGC)3;Name=tA(AGC)3;Peak-354223-354295;Summit-353474-353475;Dist--749	21	+	tA(AGC)3
Ca21chr1_C_albicans_SC5314	353740	354177	MSPC_Peak_1251;ID=tA(AGC)3;Name=tA(AGC)3;Peak-354223-354295;Summit-354022-354043;Dist--181	inf	+	tA(AGC)3
Ca21chr1_C_albicans_SC5314	368036	369000	MSPC_Peak_1250;ID=orf19.4546;Name=orf19.4546;Peak-367950-369824;Summit-368967-368968;Dist-0	34	-	orf19.4546
Ca21chr1_C_albicans_SC5314	394488	394895	MSPC_Peak_1249;ID=orf19.4531;Name=orf19.4531;Peak-395603-399427;Summit-394657-394676;Dist--928	inf	+	orf19.4531
Ca21chr1_C_albicans_SC5314	405467	405916	MSPC_Peak_1248;ID=orf19.4528.1;Name=orf19.4528.1;Peak-405767-406045;Summit-405580-405583;Dist--185	130.513	+	orf19.4528.1
Ca21chr1_C_albicans_SC5314	408298	408583	MSPC_Peak_1247;ID=orf19.4527;Name=orf19.4527;Peak-406691-408328;Summit-408298-408299;Dist-0	15	+	orf19.4527
Ca21chr1_C_albicans_SC5314	434585	434871	MSPC_Peak_1246;ID=orf19.3668;Name=orf19.3668;Peak-434435-436072;Summit-434717-434721;Dist-0	inf	-	orf19.3668
Ca21chr1_C_albicans_SC5314	451083	452099	MSPC_Peak_1245;ID=orf19.3671;Name=orf19.3671;Peak-451304-451648;Summit-451465-451466;Dist-0	inf	-	orf19.3671
Ca21chr1_C_albicans_SC5314	455968	456513	MSPC_Peak_1244;ID=orf19.3674;Name=orf19.3674;Peak-454883-455845;Summit-456218-456219;Dist--374	inf	-	orf19.3674
Ca21chr1_C_albicans_SC5314	455968	456513	MSPC_Peak_1244;ID=orf19.3674;Name=orf19.3674;Peak-454883-455845;Summit-456264-456265;Dist--420	inf	-	orf19.3674
Ca21chr1_C_albicans_SC5314	455968	456513	MSPC_Peak_1244;ID=orf19.3675;Name=orf19.3675;Peak-456773-457933;Summit-456312-456313;Dist--461	inf	+	orf19.3675
Ca21chr1_C_albicans_SC5314	462318	462820	MSPC_Peak_1243;ID=orf19.3678;Name=orf19.3678;Peak-461092-462807;Summit-462662-462663;Dist-0	40	+	orf19.3678
Ca21chr1_C_albicans_SC5314	467220	468147	MSPC_Peak_1242;ID=orf19.3681;Name=orf19.3681;Peak-469144-471771;Summit-467785-467790;Dist--1355	263.716	+	orf19.3681
Ca21chr1_C_albicans_SC5314	467220	468147	MSPC_Peak_1242;ID=orf19.3681;Name=orf19.3681;Peak-469144-471771;Summit-468018-468019;Dist--1126	263.716	+	orf19.3681
Ca21chr1_C_albicans_SC5314	471088	471399	MSPC_Peak_1241;ID=orf19.3681;Name=orf19.3681;Peak-469144-471771;Summit-471322-471323;Dist-0	38	+	orf19.3681
Ca21chr1_C_albicans_SC5314	486996	488031	MSPC_Peak_1240;ID=orf19.3690.2;Name=orf19.3690.2;Peak-487383-488232;Summit-487448-487463;Dist-0	175.386	-	orf19.3690.2
Ca21chr1_C_albicans_SC5314	488549	489030	MSPC_Peak_1239;ID=tR(CCG)1;Name=tR(CCG)1;Peak-488682-488786;Summit-488719-488720;Dist-0	inf	-	tR(CCG)1
Ca21chr1_C_albicans_SC5314	488549	489030	MSPC_Peak_1239;ID=tR(CCG)1;Name=tR(CCG)1;Peak-488682-488786;Summit-488744-488745;Dist-0	inf	-	tR(CCG)1
Ca21chr1_C_albicans_SC5314	488549	489030	MSPC_Peak_1239;ID=tR(CCG)1;Name=tR(CCG)1;Peak-488682-488786;Summit-488784-488785;Dist-0	inf	-	tR(CCG)1
Ca21chr1_C_albicans_SC5314	508457	508827	MSPC_Peak_1238;ID=orf19.2929;Name=orf19.2929;Peak-506007-511700;Summit-508715-508716;Dist-0	13	-	orf19.2929
Ca21chr1_C_albicans_SC5314	510049	510363	MSPC_Peak_1237;ID=orf19.2929;Name=orf19.2929;Peak-506007-511700;Summit-510261-510262;Dist-0	31	-	orf19.2929
Ca21chr1_C_albicans_SC5314	513433	513796	MSPC_Peak_1236;ID=orf19.2929;Name=orf19.2929;Peak-506007-511700;Summit-513574-513583;Dist--1875	inf	-	orf19.2929
Ca21chr1_C_albicans_SC5314	513433	513796	MSPC_Peak_1236;ID=orf19.2929;Name=orf19.2929;Peak-506007-511700;Summit-513604-513605;Dist--1905	inf	-	orf19.2929
Ca21chr1_C_albicans_SC5314	514576	515206	MSPC_Peak_1235;ID=orf19.2929;Name=orf19.2929;Peak-506007-511700;Summit-514990-515006;Dist--3291	inf	-	orf19.2929
Ca21chr1_C_albicans_SC5314	520980	522196	MSPC_Peak_1234;ID=orf19.2935;Name=orf19.2935;Peak-521342-522004;Summit-521900-521901;Dist-0	90	+	orf19.2935
Ca21chr1_C_albicans_SC5314	524527	524940	MSPC_Peak_1233;ID=orf19.2937;Name=orf19.2937;Peak-524030-524788;Summit-524723-524724;Dist-0	93	+	orf19.2937
Ca21chr1_C_albicans_SC5314	532229	533678	MSPC_Peak_1232;ID=orf19.2942;Name=orf19.2942;Peak-532457-534217;Summit-532543-532544;Dist-0	164	-	orf19.2942
Ca21chr1_C_albicans_SC5314	533886	534223	MSPC_Peak_1231;ID=orf19.2942;Name=orf19.2942;Peak-532457-534217;Summit-533951-533960;Dist-0	81.711	-	orf19.2942
Ca21chr1_C_albicans_SC5314	535537	537110	MSPC_Peak_1230;ID=tR(UCU)4;Name=tR(UCU)4;Peak-536589-536661;Summit-536715-536735;Dist--55	inf	-	tR(UCU)4
Ca21chr1_C_albicans_SC5314	535537	537110	MSPC_Peak_1230;ID=tR(UCU)4;Name=tR(UCU)4;Peak-536589-536661;Summit-536765-536766;Dist--105	inf	-	tR(UCU)4
Ca21chr1_C_albicans_SC5314	541472	542731	MSPC_Peak_1229;ID=orf19.2947;Name=orf19.2947;Peak-541779-542657;Summit-542046-542047;Dist-0	inf	-	orf19.2947
Ca21chr1_C_albicans_SC5314	541472	542731	MSPC_Peak_1229;ID=orf19.2947;Name=orf19.2947;Peak-541779-542657;Summit-542246-542247;Dist-0	inf	-	orf19.2947
Ca21chr1_C_albicans_SC5314	544352	545095	MSPC_Peak_1228;ID=orf19.2948;Name=orf19.2948;Peak-544113-544862;Summit-544548-544549;Dist-0	170.399	+	orf19.2948
Ca21chr1_C_albicans_SC5314	544352	545095	MSPC_Peak_1228;ID=orf19.2948;Name=orf19.2948;Peak-544113-544862;Summit-544715-544716;Dist-0	170.399	+	orf19.2948
Ca21chr1_C_albicans_SC5314	564096	564375	MSPC_Peak_1227;ID=orf19.2959;Name=orf19.2959;Peak-562417-562719;Summit-564215-564216;Dist--1497	60	-	orf19.2959
Ca21chr1_C_albicans_SC5314	630819	631583	MSPC_Peak_1226;ID=orf19.2994.1;Name=orf19.2994.1;Peak-632142-632897;Summit-630863-630864;Dist--1279	14	+	orf19.2994.1
Ca21chr1_C_albicans_SC5314	632150	633311	MSPC_Peak_1225;ID=orf19.2994.1;Name=orf19.2994.1;Peak-632142-632897;Summit-632687-632688;Dist-0	143	+	orf19.2994.1
Ca21chr1_C_albicans_SC5314	643288	644350	MSPC_Peak_1224;ID=orf19.3002;Name=orf19.3002;Peak-643289-644059;Summit-643864-643865;Dist-0	180.374	+	orf19.3002
Ca21chr1_C_albicans_SC5314	643288	644350	MSPC_Peak_1224;ID=orf19.3002;Name=orf19.3002;Peak-643289-644059;Summit-643988-643989;Dist-0	180.374	+	orf19.3002
Ca21chr1_C_albicans_SC5314	650551	651415	MSPC_Peak_1223;ID=orf19.3003.1;Name=orf19.3003.1;Peak-650129-651021;Summit-650997-650998;Dist-0	123	+	orf19.3003.1
Ca21chr1_C_albicans_SC5314	663667	664414	MSPC_Peak_1222;ID=orf19.3010.1;Name=orf19.3010.1;Peak-662242-664402;Summit-663795-663796;Dist-0	83	-	orf19.3010.1
Ca21chr1_C_albicans_SC5314	664711	665578	MSPC_Peak_1221;ID=orf19.3010.1;Name=orf19.3010.1;Peak-662242-664402;Summit-664868-664884;Dist--467	inf	-	orf19.3010.1
Ca21chr1_C_albicans_SC5314	666113	666848	MSPC_Peak_1220;ID=orf19.3010.1;Name=orf19.3010.1;Peak-662242-664402;Summit-666673-666697;Dist--2272	inf	-	orf19.3010.1
Ca21chr1_C_albicans_SC5314	672592	673358	MSPC_Peak_1219;ID=orf19.3013;Name=orf19.3013;Peak-672554-673909;Summit-673252-673253;Dist-0	46	-	orf19.3013
Ca21chr1_C_albicans_SC5314	674300	676175	MSPC_Peak_1218;ID=orf19.3013;Name=orf19.3013;Peak-672554-673909;Summit-674514-674519;Dist--606	inf	-	orf19.3013
Ca21chr1_C_albicans_SC5314	674300	676175	MSPC_Peak_1218;ID=orf19.3014;Name=orf19.3014;Peak-675145-675939;Summit-675305-675306;Dist-0	inf	-	orf19.3014
Ca21chr1_C_albicans_SC5314	676314	676786	MSPC_Peak_1217;ID=orf19.3014;Name=orf19.3014;Peak-675145-675939;Summit-676480-676481;Dist--542	99.627	-	orf19.3014
Ca21chr1_C_albicans_SC5314	676314	676786	MSPC_Peak_1217;ID=orf19.3014;Name=orf19.3014;Peak-675145-675939;Summit-676712-676713;Dist--774	99.627	-	orf19.3014
Ca21chr1_C_albicans_SC5314	700517	701259	MSPC_Peak_1216;ID=orf19.3035;Name=orf19.3035;Peak-701786-706018;Summit-700915-700916;Dist--871	66.796	+	orf19.3035
Ca21chr1_C_albicans_SC5314	700517	701259	MSPC_Peak_1216;ID=orf19.3035;Name=orf19.3035;Peak-701786-706018;Summit-700977-700978;Dist--809	66.796	+	orf19.3035
Ca21chr1_C_albicans_SC5314	708404	708665	MSPC_Peak_1214;ID=orf19.3037;Name=orf19.3037;Peak-706559-708448;Summit-708428-708429;Dist-0	16	+	orf19.3037
Ca21chr1_C_albicans_SC5314	709595	710526	MSPC_Peak_1212;ID=orf19.3038;Name=orf19.3038;Peak-709532-712198;Summit-710471-710472;Dist-0	28	+	orf19.3038
Ca21chr1_C_albicans_SC5314	719126	719514	MSPC_Peak_1210;ID=tN(GUU)3;Name=tN(GUU)3;Peak-719276-719380;Summit-719310-719311;Dist-0	inf	+	tN(GUU)3
Ca21chr1_C_albicans_SC5314	719126	719514	MSPC_Peak_1210;ID=tN(GUU)3;Name=tN(GUU)3;Peak-719276-719380;Summit-719334-719335;Dist-0	inf	+	tN(GUU)3
Ca21chr1_C_albicans_SC5314	738768	739647	MSPC_Peak_1208;ID=orf19.3054;Name=orf19.3054;Peak-740662-742107;Summit-739151-739152;Dist--1511	54.879	+	orf19.3054
Ca21chr1_C_albicans_SC5314	738768	739647	MSPC_Peak_1208;ID=orf19.3054;Name=orf19.3054;Peak-740662-742107;Summit-739199-739200;Dist--1463	54.879	+	orf19.3054
Ca21chr1_C_albicans_SC5314	746795	747535	MSPC_Peak_1206;ID=orf19.3059;Name=orf19.3059;Peak-746794-747828;Summit-747116-747117;Dist-0	104	-	orf19.3059
Ca21chr1_C_albicans_SC5314	748142	748492	MSPC_Peak_1201;ID=tL(UAA)3;Name=tL(UAA)3;Peak-748300-748415;Summit-748324-748345;Dist-0	inf	-	tL(UAA)3
Ca21chr1_C_albicans_SC5314	751273	752566	MSPC_Peak_1199;ID=orf19.3061;Name=orf19.3061;Peak-750607-751158;Summit-751427-751428;Dist--270	106	-	orf19.3061
Ca21chr1_C_albicans_SC5314	766534	766954	MSPC_Peak_1197;ID=tT(CGU)1;Name=tT(CGU)1;Peak-766708-766795;Summit-766761-766775;Dist-0	inf	-	tT(CGU)1
Ca21chr1_C_albicans_SC5314	772184	772707	MSPC_Peak_1195;ID=orf19.1133;Name=orf19.1133;Peak-767142-771005;Summit-772473-772484;Dist--1469	inf	-	orf19.1133
Ca21chr1_C_albicans_SC5314	817618	818990	MSPC_Peak_1193;ID=orf19.4459;Name=orf19.4459;Peak-813949-815640;Summit-817860-817874;Dist--2221	inf	-	orf19.4459
Ca21chr1_C_albicans_SC5314	859570	860374	MSPC_Peak_1192;ID=orf19.1042;Name=orf19.1042;Peak-859696-860544;Summit-859880-859881;Dist-0	18	-	orf19.1042
Ca21chr1_C_albicans_SC5314	866986	867549	MSPC_Peak_1190;ID=orf19.1048;Name=orf19.1048;Peak-867455-868489;Summit-867196-867197;Dist--259	inf	+	orf19.1048
Ca21chr1_C_albicans_SC5314	866986	867549	MSPC_Peak_1190;ID=orf19.1048;Name=orf19.1048;Peak-867455-868489;Summit-867219-867221;Dist--235	inf	+	orf19.1048
Ca21chr1_C_albicans_SC5314	886034	886360	MSPC_Peak_1189;ID=orf19.1064;Name=orf19.1064;Peak-886084-889191;Summit-886322-886323;Dist-0	53	-	orf19.1064
Ca21chr1_C_albicans_SC5314	887701	888134	MSPC_Peak_1188;ID=orf19.1064;Name=orf19.1064;Peak-886084-889191;Summit-887702-887703;Dist-0	16	-	orf19.1064
Ca21chr1_C_albicans_SC5314	892530	892981	MSPC_Peak_1187;ID=orf19.1065;Name=orf19.1065;Peak-890449-892386;Summit-892754-892765;Dist--369	inf	-	orf19.1065
Ca21chr1_C_albicans_SC5314	946323	946902	MSPC_Peak_1184;ID=orf19.6852;Name=orf19.6852;Peak-943709-944536;Summit-946670-946671;Dist--2135	122	-	orf19.6852
Ca21chr1_C_albicans_SC5314	951408	951732	MSPC_Peak_1181;ID=orf19.6854;Name=orf19.6854;Peak-949400-951542;Summit-951440-951441;Dist-0	55	+	orf19.6854
Ca21chr1_C_albicans_SC5314	973886	974729	MSPC_Peak_1178;ID=orf19.778;Name=orf19.778;Peak-973551-974477;Summit-974342-974343;Dist-0	27	+	orf19.778
Ca21chr1_C_albicans_SC5314	992486	993009	MSPC_Peak_1175;ID=orf19.767;Name=orf19.767;Peak-991691-992851;Summit-992487-992488;Dist-0	15	-	orf19.767
Ca21chr1_C_albicans_SC5314	1006987	1007251	MSPC_Peak_1171;ID=orf19.759;Name=orf19.759;Peak-1004536-1007346;Summit-1006997-1006998;Dist-0	20	+	orf19.759
Ca21chr1_C_albicans_SC5314	1012355	1012631	MSPC_Peak_1162;ID=orf19.756;Name=orf19.756;Peak-1013057-1014823;Summit-1012483-1012521;Dist--537	inf	+	orf19.756
Ca21chr1_C_albicans_SC5314	1016515	1017231	MSPC_Peak_1160;ID=orf19.754;Name=orf19.754;Peak-1015852-1017042;Summit-1016956-1016957;Dist-0	56.864	+	orf19.754
Ca21chr1_C_albicans_SC5314	1016515	1017231	MSPC_Peak_1160;ID=orf19.753;Name=orf19.753;Peak-1017748-1020039;Summit-1017043-1017044;Dist--705	56.864	+	orf19.753
Ca21chr1_C_albicans_SC5314	1018378	1018741	MSPC_Peak_1158;ID=orf19.753;Name=orf19.753;Peak-1017748-1020039;Summit-1018663-1018664;Dist-0	28	+	orf19.753
Ca21chr1_C_albicans_SC5314	1019462	1020177	MSPC_Peak_1156;ID=orf19.753;Name=orf19.753;Peak-1017748-1020039;Summit-1019680-1019681;Dist-0	80	+	orf19.753
Ca21chr1_C_albicans_SC5314	1040584	1040922	MSPC_Peak_1152;ID=orf19.51;Name=orf19.51;Peak-1036865-1040956;Summit-1040798-1040799;Dist-0	21	+	orf19.51
Ca21chr1_C_albicans_SC5314	1068570	1069234	MSPC_Peak_1149;ID=orf19.4060;Name=orf19.4060;Peak-1068579-1069691;Summit-1068722-1068723;Dist-0	80	-	orf19.4060
Ca21chr1_C_albicans_SC5314	1079931	1082537	MSPC_Peak_1148;ID=orf19.4056;Name=orf19.4056;Peak-1082678-1083949;Summit-1080573-1080588;Dist--2091	inf	+	orf19.4056
Ca21chr1_C_albicans_SC5314	1079931	1082537	MSPC_Peak_1148;ID=orf19.4056;Name=orf19.4056;Peak-1082678-1083949;Summit-1082227-1082233;Dist--446	inf	+	orf19.4056
Ca21chr1_C_albicans_SC5314	1085205	1091272	MSPC_Peak_1146;ID=orf19.450;Name=orf19.450;Peak-1085006-1085239;Summit-1086833-1086842;Dist--1595	inf	-	orf19.450
Ca21chr1_C_albicans_SC5314	1085205	1091272	MSPC_Peak_1146;ID=orf19.450;Name=orf19.450;Peak-1085006-1085239;Summit-1089516-1089517;Dist--4278	inf	-	orf19.450
Ca21chr1_C_albicans_SC5314	1092914	1093836	MSPC_Peak_1144;ID=orf19.449;Name=orf19.449;Peak-1092666-1093862;Summit-1093662-1093663;Dist-0	100	-	orf19.449
Ca21chr1_C_albicans_SC5314	1096313	1096898	MSPC_Peak_1141;ID=orf19.448;Name=orf19.448;Peak-1094731-1096011;Summit-1096672-1096682;Dist--662	inf	-	orf19.448
Ca21chr1_C_albicans_SC5314	1096313	1096898	MSPC_Peak_1141;ID=orf19.448;Name=orf19.448;Peak-1094731-1096011;Summit-1096736-1096737;Dist--726	inf	-	orf19.448
Ca21chr1_C_albicans_SC5314	1104654	1104904	MSPC_Peak_1138;ID=orf19.442;Name=orf19.442;Peak-1104299-1104913;Summit-1104840-1104841;Dist-0	26	+	orf19.442
Ca21chr1_C_albicans_SC5314	1113120	1113690	MSPC_Peak_1135;ID=orf19.437;Name=orf19.437;Peak-1111223-1113181;Summit-1113150-1113151;Dist-0	27	+	orf19.437
Ca21chr1_C_albicans_SC5314	1113973	1115022	MSPC_Peak_1131;ID=orf19.434;Name=orf19.434;Peak-1113371-1115479;Summit-1114638-1114639;Dist-0	40	-	orf19.434
Ca21chr1_C_albicans_SC5314	1115995	1116274	MSPC_Peak_1129;ID=tP(UGG)1;Name=tP(UGG)1;Peak-1116103-1116195;Summit-1116136-1116137;Dist-0	inf	+	tP(UGG)1
Ca21chr1_C_albicans_SC5314	1115995	1116274	MSPC_Peak_1129;ID=tP(UGG)1;Name=tP(UGG)1;Peak-1116103-1116195;Summit-1116167-1116170;Dist-0	inf	+	tP(UGG)1
Ca21chr1_C_albicans_SC5314	1165887	1166464	MSPC_Peak_1120;ID=orf19.410.3;Name=orf19.410.3;Peak-1166924-1167627;Summit-1166117-1166123;Dist--802	inf	+	orf19.410.3
Ca21chr1_C_albicans_SC5314	1165887	1166464	MSPC_Peak_1120;ID=orf19.410.3;Name=orf19.410.3;Peak-1166924-1167627;Summit-1166147-1166148;Dist--777	inf	+	orf19.410.3
Ca21chr1_C_albicans_SC5314	1167981	1168423	MSPC_Peak_1118;ID=tN(GUU)2;Name=tN(GUU)2;Peak-1168044-1168149;Summit-1168103-1168104;Dist-0	inf	+	tN(GUU)2
Ca21chr1_C_albicans_SC5314	1167981	1168423	MSPC_Peak_1118;ID=tN(GUU)2;Name=tN(GUU)2;Peak-1168044-1168149;Summit-1168126-1168128;Dist-0	inf	+	tN(GUU)2
Ca21chr1_C_albicans_SC5314	1168760	1169041	MSPC_Peak_1116;ID=tT(AGU)1;Name=tT(AGU)1;Peak-1168890-1168962;Summit-1168927-1168928;Dist-0	297	+	tT(AGU)1
Ca21chr1_C_albicans_SC5314	1185368	1185636	MSPC_Peak_1113;ID=orf19.2485;Name=orf19.2485;Peak-1183366-1187646;Summit-1185563-1185564;Dist-0	44	-	orf19.2485
Ca21chr1_C_albicans_SC5314	1195190	1195812	MSPC_Peak_1111;ID=orf19.2478.1;Name=orf19.2478.1;Peak-1195221-1196758;Summit-1195674-1195675;Dist-0	116.561	+	orf19.2478.1
Ca21chr1_C_albicans_SC5314	1195190	1195812	MSPC_Peak_1111;ID=orf19.2478.1;Name=orf19.2478.1;Peak-1195221-1196758;Summit-1195746-1195747;Dist-0	116.561	+	orf19.2478.1
Ca21chr1_C_albicans_SC5314	1196345	1196911	MSPC_Peak_1109;ID=orf19.2478.1;Name=orf19.2478.1;Peak-1195221-1196758;Summit-1196479-1196480;Dist-0	86	+	orf19.2478.1
Ca21chr1_C_albicans_SC5314	1225246	1226176	MSPC_Peak_1108;ID=orf19.2459;Name=orf19.2459;Peak-1226736-1229654;Summit-1225893-1225917;Dist--820	inf	+	orf19.2459
Ca21chr1_C_albicans_SC5314	1234980	1235458	MSPC_Peak_1106;ID=orf19.2457;Name=orf19.2457;Peak-1236354-1238429;Summit-1235220-1235224;Dist--1131	inf	+	orf19.2457
Ca21chr1_C_albicans_SC5314	1236472	1236995	MSPC_Peak_1104;ID=orf19.2457;Name=orf19.2457;Peak-1236354-1238429;Summit-1236887-1236888;Dist-0	43	+	orf19.2457
Ca21chr1_C_albicans_SC5314	1237308	1238716	MSPC_Peak_1102;ID=orf19.2454;Name=orf19.2454;Peak-1244696-1247716;Summit-1238538-1238539;Dist--6158	128	+	orf19.2454
Ca21chr1_C_albicans_SC5314	1248165	1249201	MSPC_Peak_1099;ID=orf19.2452;Name=orf19.2452;Peak-1248262-1249509;Summit-1248652-1248653;Dist-0	124	-	orf19.2452
Ca21chr1_C_albicans_SC5314	1251788	1253332	MSPC_Peak_1096;ID=orf19.2451;Name=orf19.2451;Peak-1251599-1252987;Summit-1252713-1252714;Dist-0	180	+	orf19.2451
Ca21chr1_C_albicans_SC5314	1284917	1285468	MSPC_Peak_1094;ID=orf19.2432;Name=orf19.2432;Peak-1284338-1285460;Summit-1284923-1284924;Dist-0	18	-	orf19.2432
Ca21chr1_C_albicans_SC5314	1285844	1286262	MSPC_Peak_1090;ID=orf19.2432;Name=orf19.2432;Peak-1284338-1285460;Summit-1285862-1285863;Dist--403	249.762	-	orf19.2432
Ca21chr1_C_albicans_SC5314	1285844	1286262	MSPC_Peak_1090;ID=orf19.2432;Name=orf19.2432;Peak-1284338-1285460;Summit-1286079-1286080;Dist--620	249.762	-	orf19.2432
Ca21chr1_C_albicans_SC5314	1285844	1286262	MSPC_Peak_1090;ID=orf19.2431;Name=orf19.2431;Peak-1286083-1286424;Summit-1286113-1286114;Dist-0	249.762	-	orf19.2431
Ca21chr1_C_albicans_SC5314	1291465	1292026	MSPC_Peak_1081;ID=orf19.2661;Name=orf19.2661;Peak-1292869-1293864;Summit-1291686-1291701;Dist--1169	inf	+	orf19.2661
Ca21chr1_C_albicans_SC5314	1292321	1294145	MSPC_Peak_1078;ID=orf19.2661;Name=orf19.2661;Peak-1292869-1293864;Summit-1292488-1292489;Dist--381	inf	+	orf19.2661
Ca21chr1_C_albicans_SC5314	1292321	1294145	MSPC_Peak_1078;ID=orf19.2661;Name=orf19.2661;Peak-1292869-1293864;Summit-1292510-1292531;Dist--339	inf	+	orf19.2661
Ca21chr1_C_albicans_SC5314	1303010	1303268	MSPC_Peak_1075;ID=orf19.1826;Name=orf19.1826;Peak-1300757-1302625;Summit-1303109-1303110;Dist--485	169.401	-	orf19.1826
Ca21chr1_C_albicans_SC5314	1303010	1303268	MSPC_Peak_1075;ID=orf19.1826;Name=orf19.1826;Peak-1300757-1302625;Summit-1303147-1303148;Dist--523	169.401	-	orf19.1826
Ca21chr1_C_albicans_SC5314	1321648	1325542	MSPC_Peak_1073;ID=orf19.1822;Name=orf19.1822;Peak-1314494-1317025;Summit-1321952-1321967;Dist--4928	inf	-	orf19.1822
Ca21chr1_C_albicans_SC5314	1321648	1325542	MSPC_Peak_1073;ID=orf19.1821;Name=orf19.1821;Peak-1324514-1324825;Summit-1324759-1324765;Dist-0	inf	-	orf19.1821
Ca21chr1_C_albicans_SC5314	1321648	1325542	MSPC_Peak_1073;ID=orf19.1821;Name=orf19.1821;Peak-1324514-1324825;Summit-1325290-1325291;Dist--466	inf	-	orf19.1821
Ca21chr1_C_albicans_SC5314	1326293	1327217	MSPC_Peak_1071;ID=orf19.1821;Name=orf19.1821;Peak-1324514-1324825;Summit-1326943-1326944;Dist--2119	inf	-	orf19.1821
Ca21chr1_C_albicans_SC5314	1326293	1327217	MSPC_Peak_1071;ID=orf19.1821;Name=orf19.1821;Peak-1324514-1324825;Summit-1326971-1326972;Dist--2147	inf	-	orf19.1821
Ca21chr1_C_albicans_SC5314	1329280	1330413	MSPC_Peak_1069;ID=orf19.1821;Name=orf19.1821;Peak-1324514-1324825;Summit-1329574-1329595;Dist--4750	inf	-	orf19.1821
Ca21chr1_C_albicans_SC5314	1331396	1333817	MSPC_Peak_1067;ID=snR5b;Name=snR5b;Peak-1334388-1334478;Summit-1332643-1332650;Dist--1739	inf	+	snR5b
Ca21chr1_C_albicans_SC5314	1331396	1333817	MSPC_Peak_1067;ID=snR5b;Name=snR5b;Peak-1334388-1334478;Summit-1333016-1333017;Dist--1372	inf	+	snR5b
Ca21chr1_C_albicans_SC5314	1334282	1334813	MSPC_Peak_1065;ID=snR5b;Name=snR5b;Peak-1334388-1334478;Summit-1334425-1334426;Dist-0	116.561	+	snR5b
Ca21chr1_C_albicans_SC5314	1334282	1334813	MSPC_Peak_1065;ID=orf19.177;Name=orf19.177;Peak-1337672-1340068;Summit-1334596-1334597;Dist--3076	116.561	+	orf19.177
Ca21chr1_C_albicans_SC5314	1342259	1342565	MSPC_Peak_1063;ID=orf19.6277;Name=orf19.6277;Peak-1344908-1348267;Summit-1342472-1342473;Dist--2436	112	+	orf19.6277
Ca21chr1_C_albicans_SC5314	1375684	1376738	MSPC_Peak_1061;ID=orf19.6265.1;Name=orf19.6265.1;Peak-1375913-1376741;Summit-1375975-1375976;Dist-0	42	-	orf19.6265.1
Ca21chr1_C_albicans_SC5314	1376976	1377494	MSPC_Peak_1059;ID=orf19.6265;Name=orf19.6265;Peak-1377106-1377498;Summit-1377155-1377156;Dist-0	213	-	orf19.6265
Ca21chr1_C_albicans_SC5314	1379872	1380242	MSPC_Peak_1056;ID=orf19.6264;Name=orf19.6264;Peak-1380462-1381178;Summit-1379983-1379988;Dist--475	195.968	+	orf19.6264
Ca21chr1_C_albicans_SC5314	1379872	1380242	MSPC_Peak_1056;ID=orf19.6264;Name=orf19.6264;Peak-1380462-1381178;Summit-1380065-1380066;Dist--397	195.968	+	orf19.6264
Ca21chr1_C_albicans_SC5314	1409038	1409906	MSPC_Peak_1051;ID=orf19.6250;Name=orf19.6250;Peak-1411731-1412774;Summit-1409672-1409679;Dist--2053	208.313	+	orf19.6250
Ca21chr1_C_albicans_SC5314	1468304	1470190	MSPC_Peak_1047;ID=orf19.6220.4;Name=orf19.6220.4;Peak-1468534-1469344;Summit-1468571-1468572;Dist-0	294.621	-	orf19.6220.4
Ca21chr1_C_albicans_SC5314	1468304	1470190	MSPC_Peak_1047;ID=orf19.6220.4;Name=orf19.6220.4;Peak-1468534-1469344;Summit-1469656-1469659;Dist--313	294.621	-	orf19.6220.4
Ca21chr1_C_albicans_SC5314	1483935	1484270	MSPC_Peak_1044;ID=tP(AGG)1;Name=tP(AGG)1;Peak-1484040-1484150;Summit-1484093-1484100;Dist-0	inf	-	tP(AGG)1
Ca21chr1_C_albicans_SC5314	1485487	1486080	MSPC_Peak_1027;ID=orf19.6213;Name=orf19.6213;Peak-1484830-1485732;Summit-1485687-1485688;Dist-0	20	+	orf19.6213
Ca21chr1_C_albicans_SC5314	1489583	1489894	MSPC_Peak_1022;ID=tL(UAA)4;Name=tL(UAA)4;Peak-1489673-1489788;Summit-1489763-1489764;Dist-0	188.356	-	tL(UAA)4
Ca21chr1_C_albicans_SC5314	1489583	1489894	MSPC_Peak_1022;ID=tL(UAA)4;Name=tL(UAA)4;Peak-1489673-1489788;Summit-1489796-1489797;Dist--9	188.356	-	tL(UAA)4
Ca21chr1_C_albicans_SC5314	1499328	1501132	MSPC_Peak_1019;ID=orf19.6202;Name=orf19.6202;Peak-1497979-1499055;Summit-1499557-1499566;Dist--503	inf	-	orf19.6202
Ca21chr1_C_albicans_SC5314	1499328	1501132	MSPC_Peak_1019;ID=orf19.6202;Name=orf19.6202;Peak-1497979-1499055;Summit-1500720-1500721;Dist--1666	inf	-	orf19.6202
Ca21chr1_C_albicans_SC5314	1503914	1504833	MSPC_Peak_1016;ID=orf19.6200;Name=orf19.6200;Peak-1502242-1503195;Summit-1504222-1504246;Dist--1028	inf	-	orf19.6200
Ca21chr1_C_albicans_SC5314	1510716	1511592	MSPC_Peak_1013;ID=orf19.6197;Name=orf19.6197;Peak-1509973-1511622;Summit-1511247-1511248;Dist-0	57	-	orf19.6197
Ca21chr1_C_albicans_SC5314	1521983	1523505	MSPC_Peak_1011;ID=orf19.4456;Name=orf19.4456;Peak-1527013-1528836;Summit-1522892-1522901;Dist--4113	inf	+	orf19.4456
Ca21chr1_C_albicans_SC5314	1524803	1525646	MSPC_Peak_1009;ID=orf19.4456;Name=orf19.4456;Peak-1527013-1528836;Summit-1525303-1525311;Dist--1703	inf	+	orf19.4456
Ca21chr1_C_albicans_SC5314	1524803	1525646	MSPC_Peak_1009;ID=orf19.4456;Name=orf19.4456;Peak-1527013-1528836;Summit-1525345-1525346;Dist--1668	inf	+	orf19.4456
Ca21chr1_C_albicans_SC5314	1534915	1535487	MSPC_Peak_1008;ID=orf19.4450.1;Name=orf19.4450.1;Peak-1535227-1535433;Summit-1535243-1535244;Dist-0	193	-	orf19.4450.1
Ca21chr1_C_albicans_SC5314	1536507	1537370	MSPC_Peak_1007;ID=orf19.4450;Name=orf19.4450;Peak-1536764-1538464;Summit-1537053-1537054;Dist-0	43	-	orf19.4450
Ca21chr1_C_albicans_SC5314	1569965	1570281	MSPC_Peak_1006;ID=tL(AAG)2;Name=tL(AAG)2;Peak-1570053-1570173;Summit-1570097-1570110;Dist-0	inf	-	tL(AAG)2
Ca21chr1_C_albicans_SC5314	1570925	1571367	MSPC_Peak_1002;ID=tL(AAG)2;Name=tL(AAG)2;Peak-1570053-1570173;Summit-1571220-1571228;Dist--1048	110.452	-	tL(AAG)2
Ca21chr1_C_albicans_SC5314	1570925	1571367	MSPC_Peak_1002;ID=tL(AAG)2;Name=tL(AAG)2;Peak-1570053-1570173;Summit-1571295-1571296;Dist--1123	110.452	-	tL(AAG)2
Ca21chr1_C_albicans_SC5314	1584021	1584443	MSPC_Peak_999;ID=orf19.4437;Name=orf19.4437;Peak-1581235-1584358;Summit-1584275-1584276;Dist-0	36	+	orf19.4437
Ca21chr1_C_albicans_SC5314	1614623	1615148	MSPC_Peak_996;ID=snR42a;Name=snR42a;Peak-1615576-1615673;Summit-1614890-1614891;Dist--686	159.145	+	snR42a
Ca21chr1_C_albicans_SC5314	1614623	1615148	MSPC_Peak_996;ID=snR42a;Name=snR42a;Peak-1615576-1615673;Summit-1614917-1614918;Dist--659	159.145	+	snR42a
Ca21chr1_C_albicans_SC5314	1614623	1615148	MSPC_Peak_996;ID=snR42a;Name=snR42a;Peak-1615576-1615673;Summit-1615061-1615062;Dist--515	159.145	+	snR42a
Ca21chr1_C_albicans_SC5314	1615444	1615753	MSPC_Peak_991;ID=snR42a;Name=snR42a;Peak-1615576-1615673;Summit-1615571-1615572;Dist--5	91	+	snR42a
Ca21chr1_C_albicans_SC5314	1630508	1630904	MSPC_Peak_969;ID=orf19.2800;Name=orf19.2800;Peak-1630691-1630786;Summit-1630700-1630701;Dist-0	79	+	orf19.2800
Ca21chr1_C_albicans_SC5314	1631327	1631642	MSPC_Peak_965;ID=orf19.2792;Name=orf19.2792;Peak-1626286-1629144;Summit-1631560-1631581;Dist--2417	234.262	-	orf19.2792
Ca21chr1_C_albicans_SC5314	1676961	1677232	MSPC_Peak_961;ID=orf19.1232;Name=orf19.1232;Peak-1674241-1675356;Summit-1677130-1677131;Dist--1775	29	-	orf19.1232
Ca21chr1_C_albicans_SC5314	1677773	1678866	MSPC_Peak_957;ID=orf19.1233;Name=orf19.1233;Peak-1677134-1678759;Summit-1677894-1677895;Dist-0	111.579	-	orf19.1233
Ca21chr1_C_albicans_SC5314	1677773	1678866	MSPC_Peak_957;ID=orf19.1233;Name=orf19.1233;Peak-1677134-1678759;Summit-1678672-1678673;Dist-0	111.579	-	orf19.1233
Ca21chr1_C_albicans_SC5314	1686746	1687175	MSPC_Peak_954;ID=orf19.4712;Name=orf19.4712;Peak-1691374-1692912;Summit-1686940-1686952;Dist--4423	inf	+	orf19.4712
Ca21chr1_C_albicans_SC5314	1687549	1687888	MSPC_Peak_951;ID=orf19.4712;Name=orf19.4712;Peak-1691374-1692912;Summit-1687743-1687744;Dist--3631	inf	+	orf19.4712
Ca21chr1_C_albicans_SC5314	1688379	1688952	MSPC_Peak_946;ID=orf19.4712;Name=orf19.4712;Peak-1691374-1692912;Summit-1688585-1688591;Dist--2784	inf	+	orf19.4712
Ca21chr1_C_albicans_SC5314	1688379	1688952	MSPC_Peak_946;ID=orf19.4712;Name=orf19.4712;Peak-1691374-1692912;Summit-1688634-1688635;Dist--2740	inf	+	orf19.4712
Ca21chr1_C_albicans_SC5314	1690346	1691130	MSPC_Peak_943;ID=orf19.4712;Name=orf19.4712;Peak-1691374-1692912;Summit-1690907-1690910;Dist--465	inf	+	orf19.4712
Ca21chr1_C_albicans_SC5314	1711540	1711932	MSPC_Peak_938;ID=orf19.5058;Name=orf19.5058;Peak-1711758-1713620;Summit-1711816-1711817;Dist-0	30	-	orf19.5058
Ca21chr1_C_albicans_SC5314	1712898	1713415	MSPC_Peak_933;ID=orf19.5058;Name=orf19.5058;Peak-1711758-1713620;Summit-1713128-1713129;Dist-0	115.564	-	orf19.5058
Ca21chr1_C_albicans_SC5314	1712898	1713415	MSPC_Peak_933;ID=orf19.5058;Name=orf19.5058;Peak-1711758-1713620;Summit-1713261-1713262;Dist-0	115.564	-	orf19.5058
Ca21chr1_C_albicans_SC5314	1718449	1720777	MSPC_Peak_928;ID=orf19.5061;Name=orf19.5061;Peak-1718587-1720995;Summit-1718669-1718683;Dist-0	245.776	-	orf19.5061
Ca21chr1_C_albicans_SC5314	1718449	1720777	MSPC_Peak_928;ID=orf19.5061;Name=orf19.5061;Peak-1718587-1720995;Summit-1719979-1719980;Dist-0	245.776	-	orf19.5061
Ca21chr1_C_albicans_SC5314	1728316	1729337	MSPC_Peak_922;ID=snR67;Name=snR67;Peak-1729196-1729287;Summit-1728723-1728726;Dist--471	225.279	+	snR67
Ca21chr1_C_albicans_SC5314	1731586	1731841	MSPC_Peak_917;ID=orf19.5068;Name=orf19.5068;Peak-1731684-1735358;Summit-1731790-1731791;Dist-0	17	-	orf19.5068
Ca21chr1_C_albicans_SC5314	1733221	1733548	MSPC_Peak_911;ID=orf19.5068;Name=orf19.5068;Peak-1731684-1735358;Summit-1733415-1733416;Dist-0	42	-	orf19.5068
Ca21chr1_C_albicans_SC5314	1806343	1806767	MSPC_Peak_907;ID=orf19.5102;Name=orf19.5102;Peak-1804179-1806443;Summit-1806559-1806570;Dist--117	inf	-	orf19.5102
Ca21chr1_C_albicans_SC5314	1826683	1827511	MSPC_Peak_891;ID=orf19.5112;Name=orf19.5112;Peak-1826680-1828713;Summit-1827498-1827499;Dist-0	20	+	orf19.5112
Ca21chr1_C_albicans_SC5314	1834067	1834508	MSPC_Peak_888;ID=orf19.5117;Name=orf19.5117;Peak-1834354-1835814;Summit-1834415-1834416;Dist-0	25	-	orf19.5117
Ca21chr1_C_albicans_SC5314	1848058	1849522	MSPC_Peak_885;ID=orf19.385;Name=orf19.385;Peak-1846497-1849496;Summit-1848351-1848352;Dist-0	111.579	-	orf19.385
Ca21chr1_C_albicans_SC5314	1848058	1849522	MSPC_Peak_885;ID=orf19.385;Name=orf19.385;Peak-1846497-1849496;Summit-1848837-1848838;Dist-0	111.579	-	orf19.385
Ca21chr1_C_albicans_SC5314	1850274	1851289	MSPC_Peak_881;ID=orf19.386;Name=orf19.386;Peak-1850470-1851405;Summit-1850519-1850520;Dist-0	292.627	-	orf19.386
Ca21chr1_C_albicans_SC5314	1850274	1851289	MSPC_Peak_881;ID=orf19.386;Name=orf19.386;Peak-1850470-1851405;Summit-1850756-1850757;Dist-0	292.627	-	orf19.386
Ca21chr1_C_albicans_SC5314	1850274	1851289	MSPC_Peak_881;ID=orf19.386;Name=orf19.386;Peak-1850470-1851405;Summit-1850961-1850962;Dist-0	292.627	-	orf19.386
Ca21chr1_C_albicans_SC5314	1858262	1858720	MSPC_Peak_878;ID=orf19.391;Name=orf19.391;Peak-1858237-1860375;Summit-1858632-1858633;Dist-0	37	-	orf19.391
Ca21chr1_C_albicans_SC5314	1880454	1882153	MSPC_Peak_876;ID=orf19.406;Name=orf19.406;Peak-1880646-1882136;Summit-1881403-1881404;Dist-0	55	-	orf19.406
Ca21chr1_C_albicans_SC5314	1905716	1905952	MSPC_Peak_873;ID=orf19.4732;Name=orf19.4732;Peak-1904416-1907202;Summit-1905778-1905779;Dist-0	59	-	orf19.4732
Ca21chr1_C_albicans_SC5314	1952478	1953346	MSPC_Peak_871;ID=snR128;Name=snR128;Peak-1952996-1953111;Summit-1953024-1953025;Dist-0	17	+	snR128
Ca21chr1_C_albicans_SC5314	1965975	1966859	MSPC_Peak_866;ID=orf19.4759;Name=orf19.4759;Peak-1966392-1966889;Summit-1966397-1966398;Dist-0	33.088	-	orf19.4759
Ca21chr1_C_albicans_SC5314	1965975	1966859	MSPC_Peak_866;ID=orf19.4759;Name=orf19.4759;Peak-1966392-1966889;Summit-1966563-1966564;Dist-0	33.088	-	orf19.4759
Ca21chr1_C_albicans_SC5314	1979250	1980487	MSPC_Peak_862;ID=orf19.4765;Name=orf19.4765;Peak-1978234-1978893;Summit-1979452-1979454;Dist--560	inf	-	orf19.4765
Ca21chr1_C_albicans_SC5314	1979250	1980487	MSPC_Peak_862;ID=orf19.4765;Name=orf19.4765;Peak-1978234-1978893;Summit-1979920-1979921;Dist--1028	inf	-	orf19.4765
Ca21chr1_C_albicans_SC5314	2012946	2013639	MSPC_Peak_857;ID=orf19.4776;Name=orf19.4776;Peak-2014937-2017567;Summit-2013054-2013078;Dist--1860	inf	+	orf19.4776
Ca21chr1_C_albicans_SC5314	2017539	2018617	MSPC_Peak_850;ID=orf19.4777;Name=orf19.4777;Peak-2017683-2019470;Summit-2018473-2018474;Dist-0	52	-	orf19.4777
Ca21chr1_C_albicans_SC5314	2018961	2019409	MSPC_Peak_844;ID=orf19.4777;Name=orf19.4777;Peak-2017683-2019470;Summit-2018999-2019000;Dist-0	23	-	orf19.4777
Ca21chr1_C_albicans_SC5314	2031289	2032452	MSPC_Peak_838;ID=orf19.4784;Name=orf19.4784;Peak-2031132-2034725;Summit-2031960-2031961;Dist-0	70	+	orf19.4784
Ca21chr1_C_albicans_SC5314	2050199	2050668	MSPC_Peak_814;ID=orf19.4792;Name=orf19.4792;Peak-2050138-2051811;Summit-2050637-2050638;Dist-0	26	-	orf19.4792
Ca21chr1_C_albicans_SC5314	2052187	2053385	MSPC_Peak_810;ID=orf19.4792;Name=orf19.4792;Peak-2050138-2051811;Summit-2053164-2053174;Dist--1354	inf	-	orf19.4792
Ca21chr1_C_albicans_SC5314	2088291	2088780	MSPC_Peak_804;ID=orf19.4809;Name=orf19.4809;Peak-2087469-2088764;Summit-2088630-2088631;Dist-0	37	+	orf19.4809
Ca21chr1_C_albicans_SC5314	2101130	2101403	MSPC_Peak_799;ID=orf19.4818;Name=orf19.4818;Peak-2102705-2104288;Summit-2101233-2101250;Dist--1456	308.582	+	orf19.4818
Ca21chr1_C_albicans_SC5314	2105279	2105937	MSPC_Peak_794;ID=orf19.4820;Name=orf19.4820;Peak-2107090-2108712;Summit-2105523-2105543;Dist--1548	inf	+	orf19.4820
Ca21chr1_C_albicans_SC5314	2121353	2121740	MSPC_Peak_793;ID=orf19.4826;Name=orf19.4826;Peak-2120442-2121755;Summit-2121582-2121583;Dist-0	40	+	orf19.4826
Ca21chr1_C_albicans_SC5314	2122232	2123138	MSPC_Peak_792;ID=orf19.4827;Name=orf19.4827;Peak-2122303-2123589;Summit-2122515-2122516;Dist-0	82.706	+	orf19.4827
Ca21chr1_C_albicans_SC5314	2122232	2123138	MSPC_Peak_792;ID=orf19.4827;Name=orf19.4827;Peak-2122303-2123589;Summit-2123123-2123124;Dist-0	82.706	+	orf19.4827
Ca21chr1_C_albicans_SC5314	2123182	2123646	MSPC_Peak_791;ID=orf19.4827;Name=orf19.4827;Peak-2122303-2123589;Summit-2123186-2123187;Dist-0	17	+	orf19.4827
Ca21chr1_C_albicans_SC5314	2130895	2131568	MSPC_Peak_790;ID=orf19.4831;Name=orf19.4831;Peak-2129818-2131359;Summit-2130962-2130963;Dist-0	28	+	orf19.4831
Ca21chr1_C_albicans_SC5314	2137700	2138129	MSPC_Peak_789;ID=orf19.4836;Name=orf19.4836;Peak-2137047-2138381;Summit-2137892-2137893;Dist-0	33	+	orf19.4836
Ca21chr1_C_albicans_SC5314	2138276	2138657	MSPC_Peak_788;ID=orf19.4837;Name=orf19.4837;Peak-2138563-2139396;Summit-2138627-2138628;Dist-0	27	+	orf19.4837
Ca21chr1_C_albicans_SC5314	2164196	2165030	MSPC_Peak_787;ID=tS(CGA)1;Name=tS(CGA)1;Peak-2164292-2164386;Summit-2164680-2164681;Dist--295	inf	-	tS(CGA)1
Ca21chr1_C_albicans_SC5314	2164196	2165030	MSPC_Peak_787;ID=tS(CGA)1;Name=tS(CGA)1;Peak-2164292-2164386;Summit-2164723-2164724;Dist--338	inf	-	tS(CGA)1
Ca21chr1_C_albicans_SC5314	2183366	2183660	MSPC_Peak_786;ID=orf19.4866;Name=orf19.4866;Peak-2183344-2185137;Summit-2183429-2183430;Dist-0	18	-	orf19.4866
Ca21chr1_C_albicans_SC5314	2193906	2194230	MSPC_Peak_783;ID=orf19.4869;Name=orf19.4869;Peak-2195405-2196958;Summit-2194073-2194074;Dist--1332	271.199	+	orf19.4869
Ca21chr1_C_albicans_SC5314	2193906	2194230	MSPC_Peak_783;ID=orf19.4869;Name=orf19.4869;Peak-2195405-2196958;Summit-2194099-2194100;Dist--1306	271.199	+	orf19.4869
Ca21chr1_C_albicans_SC5314	2200331	2201002	MSPC_Peak_747;ID=orf19.4871;Name=orf19.4871;Peak-2199912-2201654;Summit-2200612-2200613;Dist-0	42	+	orf19.4871
Ca21chr1_C_albicans_SC5314	2201388	2201900	MSPC_Peak_740;ID=orf19.4872;Name=orf19.4872;Peak-2202256-2203107;Summit-2201727-2201728;Dist--529	54	+	orf19.4872
Ca21chr1_C_albicans_SC5314	2213722	2214356	MSPC_Peak_733;ID=orf19.4880;Name=orf19.4880;Peak-2214100-2216268;Summit-2214138-2214139;Dist-0	inf	+	orf19.4880
Ca21chr1_C_albicans_SC5314	2213722	2214356	MSPC_Peak_733;ID=orf19.4880;Name=orf19.4880;Peak-2214100-2216268;Summit-2214166-2214172;Dist-0	inf	+	orf19.4880
Ca21chr1_C_albicans_SC5314	2217606	2218212	MSPC_Peak_727;ID=orf19.4883;Name=orf19.4883;Peak-2217971-2220202;Summit-2217981-2217997;Dist-0	236.807	-	orf19.4883
Ca21chr1_C_albicans_SC5314	2236404	2236655	MSPC_Peak_721;ID=orf19.4885;Name=orf19.4885;Peak-2236380-2237303;Summit-2236650-2236651;Dist-0	15	+	orf19.4885
Ca21chr1_C_albicans_SC5314	2238663	2238917	MSPC_Peak_716;ID=orf19.4886;Name=orf19.4886;Peak-2239176-2239892;Summit-2238766-2238767;Dist--410	193.345	+	orf19.4886
Ca21chr1_C_albicans_SC5314	2238663	2238917	MSPC_Peak_716;ID=orf19.4886;Name=orf19.4886;Peak-2239176-2239892;Summit-2238794-2238795;Dist--382	193.345	+	orf19.4886
Ca21chr1_C_albicans_SC5314	2253975	2254719	MSPC_Peak_712;ID=orf19.4890;Name=orf19.4890;Peak-2249543-2252473;Summit-2254384-2254392;Dist--1912	inf	-	orf19.4890
Ca21chr1_C_albicans_SC5314	2253975	2254719	MSPC_Peak_712;ID=orf19.4890;Name=orf19.4890;Peak-2249543-2252473;Summit-2254421-2254422;Dist--1949	inf	-	orf19.4890
Ca21chr1_C_albicans_SC5314	2270299	2270629	MSPC_Peak_706;ID=orf19.4899;Name=orf19.4899;Peak-2271539-2274379;Summit-2270471-2270472;Dist--1068	88	+	orf19.4899
Ca21chr1_C_albicans_SC5314	2271691	2272230	MSPC_Peak_700;ID=orf19.4899;Name=orf19.4899;Peak-2271539-2274379;Summit-2272193-2272194;Dist-0	20	+	orf19.4899
Ca21chr1_C_albicans_SC5314	2274056	2274357	MSPC_Peak_695;ID=orf19.4899;Name=orf19.4899;Peak-2271539-2274379;Summit-2274174-2274175;Dist-0	13	+	orf19.4899
Ca21chr1_C_albicans_SC5314	2274661	2275716	MSPC_Peak_690;ID=orf19.4900;Name=orf19.4900;Peak-2276399-2278885;Summit-2275400-2275414;Dist--986	inf	+	orf19.4900
Ca21chr1_C_albicans_SC5314	2276393	2276870	MSPC_Peak_686;ID=orf19.4900;Name=orf19.4900;Peak-2276399-2278885;Summit-2276706-2276707;Dist-0	78.727	+	orf19.4900
Ca21chr1_C_albicans_SC5314	2276393	2276870	MSPC_Peak_686;ID=orf19.4900;Name=orf19.4900;Peak-2276399-2278885;Summit-2276752-2276753;Dist-0	78.727	+	orf19.4900
Ca21chr1_C_albicans_SC5314	2277140	2279073	MSPC_Peak_681;ID=orf19.4900;Name=orf19.4900;Peak-2276399-2278885;Summit-2278833-2278834;Dist-0	79.722	+	orf19.4900
Ca21chr1_C_albicans_SC5314	2277140	2279073	MSPC_Peak_681;ID=orf19.4901;Name=orf19.4901;Peak-2280112-2281146;Summit-2278912-2278913;Dist--1200	79.722	+	orf19.4901
Ca21chr1_C_albicans_SC5314	2289778	2290157	MSPC_Peak_676;ID=orf19.4906;Name=orf19.4906;Peak-2287271-2289577;Summit-2289822-2289823;Dist--246	46	-	orf19.4906
Ca21chr1_C_albicans_SC5314	2299669	2300707	MSPC_Peak_627;ID=orf19.4909;Name=orf19.4909;Peak-2296938-2299136;Summit-2299895-2299896;Dist--760	220.289	-	orf19.4909
Ca21chr1_C_albicans_SC5314	2299669	2300707	MSPC_Peak_627;ID=orf19.4909.1;Name=orf19.4909.1;Peak-2300032-2300710;Summit-2300170-2300171;Dist-0	220.289	-	orf19.4909.1
Ca21chr1_C_albicans_SC5314	2315161	2316457	MSPC_Peak_624;ID=orf19.986;Name=orf19.986;Peak-2315247-2316368;Summit-2315566-2315567;Dist-0	55.871	+	orf19.986
Ca21chr1_C_albicans_SC5314	2315161	2316457	MSPC_Peak_624;ID=orf19.986;Name=orf19.986;Peak-2315247-2316368;Summit-2316130-2316131;Dist-0	55.871	+	orf19.986
Ca21chr1_C_albicans_SC5314	2366068	2366538	MSPC_Peak_619;ID=orf19.1839;Name=orf19.1839;Peak-2364348-2369345;Summit-2366461-2366462;Dist-0	39	-	orf19.1839
Ca21chr1_C_albicans_SC5314	2391812	2392560	MSPC_Peak_614;ID=orf19.2340;Name=orf19.2340;Peak-2390766-2393246;Summit-2392290-2392291;Dist-0	39	+	orf19.2340
Ca21chr1_C_albicans_SC5314	2393371	2394982	MSPC_Peak_609;ID=orf19.2336;Name=orf19.2336;Peak-2396292-2396900;Summit-2393406-2393407;Dist--2886	53	+	orf19.2336
Ca21chr1_C_albicans_SC5314	2402407	2402976	MSPC_Peak_605;ID=orf19.2332;Name=orf19.2332;Peak-2403598-2404392;Summit-2402513-2402514;Dist--1085	157.432	+	orf19.2332
Ca21chr1_C_albicans_SC5314	2402407	2402976	MSPC_Peak_605;ID=orf19.2332;Name=orf19.2332;Peak-2403598-2404392;Summit-2402544-2402545;Dist--1054	157.432	+	orf19.2332
Ca21chr1_C_albicans_SC5314	2406592	2407727	MSPC_Peak_601;ID=orf19.2329.1;Name=orf19.2329.1;Peak-2406592-2407384;Summit-2407336-2407337;Dist-0	42	+	orf19.2329.1
Ca21chr1_C_albicans_SC5314	2408957	2409429	MSPC_Peak_597;ID=orf19.2330;Name=orf19.2330;Peak-2407857-2409152;Summit-2409116-2409117;Dist-0	37	+	orf19.2330
Ca21chr1_C_albicans_SC5314	2410214	2410563	MSPC_Peak_593;ID=tI(UAU)1;Name=tI(UAU)1;Peak-2410353-2410460;Summit-2410382-2410402;Dist-0	inf	-	tI(UAU)1
Ca21chr1_C_albicans_SC5314	2432503	2433714	MSPC_Peak_588;ID=orf19.2311;Name=orf19.2311;Peak-2432455-2433574;Summit-2433347-2433348;Dist-0	53	+	orf19.2311
Ca21chr1_C_albicans_SC5314	2434175	2434727	MSPC_Peak_583;ID=orf19.2310;Name=orf19.2310;Peak-2434657-2435635;Summit-2434501-2434502;Dist--156	103	+	orf19.2310
Ca21chr1_C_albicans_SC5314	2435797	2436043	MSPC_Peak_577;ID=orf19.2309.2;Name=orf19.2309.2;Peak-2435875-2437043;Summit-2436036-2436037;Dist-0	18	-	orf19.2309.2
Ca21chr1_C_albicans_SC5314	2436785	2437065	MSPC_Peak_572;ID=orf19.2309.2;Name=orf19.2309.2;Peak-2435875-2437043;Summit-2436796-2436797;Dist-0	21	-	orf19.2309.2
Ca21chr1_C_albicans_SC5314	2441985	2443403	MSPC_Peak_566;ID=orf19.2308;Name=orf19.2308;Peak-2442032-2443117;Summit-2443017-2443018;Dist-0	58	+	orf19.2308
Ca21chr1_C_albicans_SC5314	2453907	2454615	MSPC_Peak_553;ID=orf19.2298;Name=orf19.2298;Peak-2453068-2454381;Summit-2454186-2454187;Dist-0	259	+	orf19.2298
Ca21chr1_C_albicans_SC5314	2492115	2493142	MSPC_Peak_550;ID=orf19.668;Name=orf19.668;Peak-2489908-2491386;Summit-2492783-2492784;Dist--1398	64	-	orf19.668
Ca21chr1_C_albicans_SC5314	2515130	2515371	MSPC_Peak_548;ID=orf19.657;Name=orf19.657;Peak-2513620-2514777;Summit-2515253-2515254;Dist--477	102	-	orf19.657
Ca21chr1_C_albicans_SC5314	2531309	2531606	MSPC_Peak_546;ID=orf19.1168;Name=orf19.1168;Peak-2531361-2531948;Summit-2531487-2531488;Dist-0	28	-	orf19.1168
Ca21chr1_C_albicans_SC5314	2541554	2541805	MSPC_Peak_545;ID=orf19.1162;Name=orf19.1162;Peak-2541437-2541814;Summit-2541698-2541699;Dist-0	62	+	orf19.1162
Ca21chr1_C_albicans_SC5314	2542597	2542873	MSPC_Peak_543;ID=orf19.1161;Name=orf19.1161;Peak-2542332-2547464;Summit-2542861-2542862;Dist-0	23	+	orf19.1161
Ca21chr1_C_albicans_SC5314	2544605	2544889	MSPC_Peak_541;ID=orf19.1161;Name=orf19.1161;Peak-2542332-2547464;Summit-2544840-2544841;Dist-0	45	+	orf19.1161
Ca21chr1_C_albicans_SC5314	2554419	2555139	MSPC_Peak_540;ID=orf19.1153;Name=orf19.1153;Peak-2555881-2557587;Summit-2554914-2554915;Dist--967	131	+	orf19.1153
Ca21chr1_C_albicans_SC5314	2557249	2557490	MSPC_Peak_537;ID=orf19.1153;Name=orf19.1153;Peak-2555881-2557587;Summit-2557340-2557341;Dist-0	31	+	orf19.1153
Ca21chr1_C_albicans_SC5314	2558880	2559326	MSPC_Peak_535;ID=orf19.1152;Name=orf19.1152;Peak-2558395-2559192;Summit-2559188-2559189;Dist-0	62	+	orf19.1152
Ca21chr1_C_albicans_SC5314	2582544	2583310	MSPC_Peak_534;ID=snR8a;Name=snR8a;Peak-2583867-2583978;Summit-2583030-2583031;Dist--837	inf	+	snR8a
Ca21chr1_C_albicans_SC5314	2582544	2583310	MSPC_Peak_534;ID=snR8a;Name=snR8a;Peak-2583867-2583978;Summit-2583053-2583070;Dist--798	inf	+	snR8a
Ca21chr1_C_albicans_SC5314	2583715	2584293	MSPC_Peak_531;ID=snR8a;Name=snR8a;Peak-2583867-2583978;Summit-2583930-2583936;Dist-0	291.63	+	snR8a
Ca21chr1_C_albicans_SC5314	2583715	2584293	MSPC_Peak_531;ID=snR8a;Name=snR8a;Peak-2583867-2583978;Summit-2583966-2583967;Dist-0	291.63	+	snR8a
Ca21chr1_C_albicans_SC5314	2588607	2589430	MSPC_Peak_529;ID=tY(GUA)1;Name=tY(GUA)1;Peak-2588713-2588821;Summit-2588774-2588775;Dist-0	inf	+	tY(GUA)1
Ca21chr1_C_albicans_SC5314	2588607	2589430	MSPC_Peak_529;ID=tY(GUA)4;Name=tY(GUA)4;Peak-2589199-2589292;Summit-2589232-2589233;Dist-0	inf	+	tY(GUA)4
Ca21chr1_C_albicans_SC5314	2592449	2592925	MSPC_Peak_525;ID=orf19.5282;Name=orf19.5282;Peak-2593345-2594787;Summit-2592512-2592513;Dist--833	27	+	orf19.5282
Ca21chr1_C_albicans_SC5314	2594104	2594376	MSPC_Peak_510;ID=orf19.5282;Name=orf19.5282;Peak-2593345-2594787;Summit-2594279-2594280;Dist-0	83	+	orf19.5282
Ca21chr1_C_albicans_SC5314	2597058	2599080	MSPC_Peak_504;ID=orf19.5281;Name=orf19.5281;Peak-2595379-2599041;Summit-2597202-2597203;Dist-0	47	+	orf19.5281
Ca21chr1_C_albicans_SC5314	2600401	2601192	MSPC_Peak_497;ID=orf19.5280;Name=orf19.5280;Peak-2600273-2601934;Summit-2601156-2601157;Dist-0	24	+	orf19.5280
Ca21chr1_C_albicans_SC5314	2627881	2628189	MSPC_Peak_492;ID=orf19.5265;Name=orf19.5265;Peak-2626667-2629381;Summit-2628057-2628058;Dist-0	58	-	orf19.5265
Ca21chr1_C_albicans_SC5314	2628596	2629347	MSPC_Peak_487;ID=orf19.5265;Name=orf19.5265;Peak-2626667-2629381;Summit-2629044-2629045;Dist-0	23	-	orf19.5265
Ca21chr1_C_albicans_SC5314	2629628	2630661	MSPC_Peak_482;ID=orf19.5265;Name=orf19.5265;Peak-2626667-2629381;Summit-2629887-2629888;Dist--507	99	-	orf19.5265
Ca21chr1_C_albicans_SC5314	2631748	2632518	MSPC_Peak_478;ID=orf19.5264;Name=orf19.5264;Peak-2632107-2632532;Summit-2631912-2631913;Dist--195	inf	+	orf19.5264
Ca21chr1_C_albicans_SC5314	2631748	2632518	MSPC_Peak_478;ID=orf19.5264;Name=orf19.5264;Peak-2632107-2632532;Summit-2631938-2631945;Dist--163	inf	+	orf19.5264
Ca21chr1_C_albicans_SC5314	2633288	2634501	MSPC_Peak_472;ID=orf19.5263;Name=orf19.5263;Peak-2633019-2634410;Summit-2633952-2633953;Dist-0	52	+	orf19.5263
Ca21chr1_C_albicans_SC5314	2693802	2694512	MSPC_Peak_467;ID=orf19.5228;Name=orf19.5228;Peak-2694013-2694636;Summit-2694105-2694106;Dist-0	45	-	orf19.5228
Ca21chr1_C_albicans_SC5314	2698092	2699215	MSPC_Peak_461;ID=orf19.5226;Name=orf19.5226;Peak-2696598-2697872;Summit-2698345-2698346;Dist--474	80	-	orf19.5226
Ca21chr1_C_albicans_SC5314	2699758	2700105	MSPC_Peak_455;ID=orf19.5225;Name=orf19.5225;Peak-2699732-2700109;Summit-2699888-2699906;Dist-0	81.711	-	orf19.5225
Ca21chr1_C_albicans_SC5314	2709039	2709479	MSPC_Peak_450;ID=orf19.5219;Name=orf19.5219;Peak-2709143-2717074;Summit-2709300-2709301;Dist-0	27	-	orf19.5219
Ca21chr1_C_albicans_SC5314	2711597	2712339	MSPC_Peak_445;ID=orf19.5219;Name=orf19.5219;Peak-2709143-2717074;Summit-2712154-2712155;Dist-0	36	-	orf19.5219
Ca21chr1_C_albicans_SC5314	2712819	2713139	MSPC_Peak_440;ID=orf19.5219;Name=orf19.5219;Peak-2709143-2717074;Summit-2712888-2712889;Dist-0	36	-	orf19.5219
Ca21chr1_C_albicans_SC5314	2714039	2714754	MSPC_Peak_427;ID=orf19.5219;Name=orf19.5219;Peak-2709143-2717074;Summit-2714228-2714229;Dist-0	45	-	orf19.5219
Ca21chr1_C_albicans_SC5314	2718618	2719180	MSPC_Peak_423;ID=orf19.69.2;Name=orf19.69.2;Peak-2718745-2719038;Summit-2718788-2718798;Dist-0	inf	-	orf19.69.2
Ca21chr1_C_albicans_SC5314	2723638	2724369	MSPC_Peak_420;ID=orf19.3767;Name=orf19.3767;Peak-2723345-2727364;Summit-2724142-2724143;Dist-0	44	+	orf19.3767
Ca21chr1_C_albicans_SC5314	2725809	2726973	MSPC_Peak_416;ID=orf19.3767;Name=orf19.3767;Peak-2723345-2727364;Summit-2726024-2726025;Dist-0	63	+	orf19.3767
Ca21chr1_C_albicans_SC5314	2727466	2727846	MSPC_Peak_413;ID=tW(CCA)1;Name=tW(CCA)1;Peak-2727637-2727733;Summit-2727666-2727700;Dist-0	inf	-	tW(CCA)1
Ca21chr1_C_albicans_SC5314	2728472	2728977	MSPC_Peak_409;ID=tW(CCA)1;Name=tW(CCA)1;Peak-2727637-2727733;Summit-2728593-2728594;Dist--861	172.394	-	tW(CCA)1
Ca21chr1_C_albicans_SC5314	2728472	2728977	MSPC_Peak_409;ID=orf19.3765;Name=orf19.3765;Peak-2729519-2733700;Summit-2728880-2728881;Dist--639	172.394	+	orf19.3765
Ca21chr1_C_albicans_SC5314	2754098	2754389	MSPC_Peak_404;ID=orf19.6362;Name=orf19.6362;Peak-2752581-2756981;Summit-2754281-2754282;Dist-0	44	+	orf19.6362
Ca21chr1_C_albicans_SC5314	2782949	2783741	MSPC_Peak_399;ID=orf19.6345;Name=orf19.6345;Peak-2782583-2785375;Summit-2783024-2783025;Dist-0	30	+	orf19.6345
Ca21chr1_C_albicans_SC5314	2784160	2784656	MSPC_Peak_392;ID=orf19.6345;Name=orf19.6345;Peak-2782583-2785375;Summit-2784424-2784425;Dist-0	70	+	orf19.6345
Ca21chr1_C_albicans_SC5314	2830748	2831795	MSPC_Peak_385;ID=snR70;Name=snR70;Peak-2831408-2831499;Summit-2831446-2831447;Dist-0	122.539	+	snR70
Ca21chr1_C_albicans_SC5314	2830748	2831795	MSPC_Peak_385;ID=snR70;Name=snR70;Peak-2831408-2831499;Summit-2831484-2831485;Dist-0	122.539	+	snR70
Ca21chr1_C_albicans_SC5314	2839004	2839547	MSPC_Peak_380;ID=orf19.4931;Name=orf19.4931;Peak-2836544-2838889;Summit-2839173-2839174;Dist--285	185.017	-	orf19.4931
Ca21chr1_C_albicans_SC5314	2839004	2839547	MSPC_Peak_380;ID=orf19.4931;Name=orf19.4931;Peak-2836544-2838889;Summit-2839241-2839242;Dist--353	185.017	-	orf19.4931
Ca21chr1_C_albicans_SC5314	2839004	2839547	MSPC_Peak_380;ID=orf19.4931;Name=orf19.4931;Peak-2836544-2838889;Summit-2839296-2839297;Dist--408	185.017	-	orf19.4931
Ca21chr1_C_albicans_SC5314	2839945	2841068	MSPC_Peak_372;ID=orf19.4931.1;Name=orf19.4931.1;Peak-2839943-2840692;Summit-2840557-2840562;Dist-0	53.886	+	orf19.4931.1
Ca21chr1_C_albicans_SC5314	2850665	2851048	MSPC_Peak_368;ID=orf19.4936;Name=orf19.4936;Peak-2853604-2853999;Summit-2850841-2850870;Dist--2735	inf	+	orf19.4936
Ca21chr1_C_albicans_SC5314	2852519	2853535	MSPC_Peak_362;ID=orf19.4936;Name=orf19.4936;Peak-2853604-2853999;Summit-2852661-2852662;Dist--943	inf	+	orf19.4936
Ca21chr1_C_albicans_SC5314	2852519	2853535	MSPC_Peak_362;ID=orf19.4936;Name=orf19.4936;Peak-2853604-2853999;Summit-2852719-2852725;Dist--880	inf	+	orf19.4936
Ca21chr1_C_albicans_SC5314	2853999	2854498	MSPC_Peak_345;ID=orf19.4936.1;Name=orf19.4936.1;Peak-2855099-2855314;Summit-2854233-2854239;Dist--861	inf	+	orf19.4936.1
Ca21chr1_C_albicans_SC5314	2853999	2854498	MSPC_Peak_345;ID=orf19.4936.1;Name=orf19.4936.1;Peak-2855099-2855314;Summit-2854261-2854262;Dist--838	inf	+	orf19.4936.1
Ca21chr1_C_albicans_SC5314	2857114	2857732	MSPC_Peak_341;ID=orf19.4937;Name=orf19.4937;Peak-2856351-2859992;Summit-2857371-2857372;Dist-0	38	-	orf19.4937
Ca21chr1_C_albicans_SC5314	2860927	2861330	MSPC_Peak_338;ID=orf19.4937;Name=orf19.4937;Peak-2856351-2859992;Summit-2861106-2861128;Dist--1115	inf	-	orf19.4937
Ca21chr1_C_albicans_SC5314	2881231	2881502	MSPC_Peak_334;ID=orf19.4945;Name=orf19.4945;Peak-2875727-2879371;Summit-2881281-2881282;Dist--1911	51	-	orf19.4945
Ca21chr1_C_albicans_SC5314	2883296	2883845	MSPC_Peak_331;ID=orf19.4949;Name=orf19.4949;Peak-2883066-2883368;Summit-2883591-2883592;Dist--224	18	-	orf19.4949
Ca21chr1_C_albicans_SC5314	2890007	2892064	MSPC_Peak_326;ID=orf19.4952;Name=orf19.4952;Peak-2891695-2892633;Summit-2890257-2890274;Dist--1422	inf	+	orf19.4952
Ca21chr1_C_albicans_SC5314	2890007	2892064	MSPC_Peak_326;ID=orf19.4952;Name=orf19.4952;Peak-2891695-2892633;Summit-2891924-2891925;Dist-0	inf	+	orf19.4952
Ca21chr1_C_albicans_SC5314	2909958	2911299	MSPC_Peak_323;ID=orf19.4961;Name=orf19.4961;Peak-2911732-2913486;Summit-2910867-2910883;Dist--850	inf	+	orf19.4961
Ca21chr1_C_albicans_SC5314	2912004	2912713	MSPC_Peak_318;ID=orf19.4961;Name=orf19.4961;Peak-2911732-2913486;Summit-2912636-2912637;Dist-0	43	+	orf19.4961
Ca21chr1_C_albicans_SC5314	2942738	2943299	MSPC_Peak_316;ID=orf19.4975;Name=orf19.4975;Peak-2944794-2947553;Summit-2942901-2942902;Dist--1893	inf	+	orf19.4975
Ca21chr1_C_albicans_SC5314	2942738	2943299	MSPC_Peak_316;ID=orf19.4975;Name=orf19.4975;Peak-2944794-2947553;Summit-2942930-2942946;Dist--1849	inf	+	orf19.4975
Ca21chr1_C_albicans_SC5314	2943435	2943725	MSPC_Peak_312;ID=orf19.4975;Name=orf19.4975;Peak-2944794-2947553;Summit-2943633-2943634;Dist--1161	82	+	orf19.4975
Ca21chr1_C_albicans_SC5314	2943950	2944611	MSPC_Peak_308;ID=orf19.4975;Name=orf19.4975;Peak-2944794-2947553;Summit-2943994-2943995;Dist--800	74.749	+	orf19.4975
Ca21chr1_C_albicans_SC5314	2943950	2944611	MSPC_Peak_308;ID=orf19.4975;Name=orf19.4975;Peak-2944794-2947553;Summit-2944473-2944474;Dist--321	74.749	+	orf19.4975
Ca21chr1_C_albicans_SC5314	2955210	2955480	MSPC_Peak_304;ID=orf19.4980;Name=orf19.4980;Peak-2955762-2957732;Summit-2955391-2955392;Dist--371	241	+	orf19.4980
Ca21chr1_C_albicans_SC5314	2960178	2960567	MSPC_Peak_299;ID=orf19.4981;Name=orf19.4981;Peak-2958018-2960132;Summit-2960405-2960406;Dist--274	124.352	-	orf19.4981
Ca21chr1_C_albicans_SC5314	2960178	2960567	MSPC_Peak_299;ID=orf19.4981;Name=orf19.4981;Peak-2958018-2960132;Summit-2960449-2960450;Dist--318	124.352	-	orf19.4981
Ca21chr1_C_albicans_SC5314	2960178	2960567	MSPC_Peak_299;ID=snR3a;Name=snR3a;Peak-2960461-2960571;Summit-2960482-2960483;Dist-0	124.352	-	snR3a
Ca21chr1_C_albicans_SC5314	2973653	2974042	MSPC_Peak_295;ID=orf19.4991;Name=orf19.4991;Peak-2976356-2979172;Summit-2973813-2973829;Dist--2528	inf	+	orf19.4991
Ca21chr1_C_albicans_SC5314	2992356	2993763	MSPC_Peak_290;ID=orf19.4998;Name=orf19.4998;Peak-2993348-2996389;Summit-2992885-2992886;Dist--463	68.784	+	orf19.4998
Ca21chr1_C_albicans_SC5314	2992356	2993763	MSPC_Peak_290;ID=orf19.4998;Name=orf19.4998;Peak-2993348-2996389;Summit-2993758-2993759;Dist-0	68.784	+	orf19.4998
Ca21chr1_C_albicans_SC5314	3008463	3008802	MSPC_Peak_277;ID=orf19.5006;Name=orf19.5006;Peak-3008491-3009024;Summit-3008565-3008566;Dist-0	60	-	orf19.5006
Ca21chr1_C_albicans_SC5314	3009493	3009751	MSPC_Peak_274;ID=orf19.5006.1;Name=orf19.5006.1;Peak-3009603-3010010;Summit-3009644-3009645;Dist-0	53	-	orf19.5006.1
Ca21chr1_C_albicans_SC5314	3011653	3013022	MSPC_Peak_271;ID=orf19.5007;Name=orf19.5007;Peak-3011464-3013252;Summit-3011912-3011913;Dist-0	50.91	+	orf19.5007
Ca21chr1_C_albicans_SC5314	3011653	3013022	MSPC_Peak_271;ID=orf19.5007;Name=orf19.5007;Peak-3011464-3013252;Summit-3012975-3012976;Dist-0	50.91	+	orf19.5007
Ca21chr1_C_albicans_SC5314	3026623	3027483	MSPC_Peak_267;ID=orf19.5015;Name=orf19.5015;Peak-3026140-3030825;Summit-3027374-3027375;Dist-0	47	+	orf19.5015
Ca21chr1_C_albicans_SC5314	3034558	3034881	MSPC_Peak_262;ID=orf19.5019;Name=orf19.5019;Peak-3035261-3037345;Summit-3034622-3034623;Dist--639	87.681	+	orf19.5019
Ca21chr1_C_albicans_SC5314	3034558	3034881	MSPC_Peak_262;ID=orf19.5019;Name=orf19.5019;Peak-3035261-3037345;Summit-3034760-3034761;Dist--501	87.681	+	orf19.5019
Ca21chr1_C_albicans_SC5314	3035810	3036094	MSPC_Peak_257;ID=orf19.5019;Name=orf19.5019;Peak-3035261-3037345;Summit-3036038-3036039;Dist-0	21	+	orf19.5019
Ca21chr1_C_albicans_SC5314	3039026	3039414	MSPC_Peak_252;ID=orf19.5021;Name=orf19.5021;Peak-3039105-3040358;Summit-3039271-3039272;Dist-0	43	-	orf19.5021
Ca21chr1_C_albicans_SC5314	3039691	3040105	MSPC_Peak_248;ID=orf19.5021;Name=orf19.5021;Peak-3039105-3040358;Summit-3039707-3039708;Dist-0	30	-	orf19.5021
Ca21chr1_C_albicans_SC5314	3047380	3048189	MSPC_Peak_243;ID=orf19.5024;Name=orf19.5024;Peak-3045995-3048182;Summit-3047416-3047417;Dist-0	37	-	orf19.5024
Ca21chr1_C_albicans_SC5314	3060946	3061705	MSPC_Peak_238;ID=tA(AGC)7;Name=tA(AGC)7;Peak-3061122-3061194;Summit-3061186-3061187;Dist-0	inf	-	tA(AGC)7
Ca21chr1_C_albicans_SC5314	3119781	3120187	MSPC_Peak_233;ID=orf19.7222;Name=orf19.7222;Peak-3119961-3120326;Summit-3119968-3119969;Dist-0	99	-	orf19.7222
Ca21chr1_C_albicans_SC5314	3120458	3120899	MSPC_Peak_230;ID=orf19.7222;Name=orf19.7222;Peak-3119961-3120326;Summit-3120625-3120626;Dist--300	inf	-	orf19.7222
Ca21chr1_C_albicans_SC5314	3120458	3120899	MSPC_Peak_230;ID=orf19.7222;Name=orf19.7222;Peak-3119961-3120326;Summit-3120652-3120658;Dist--327	inf	-	orf19.7222
Ca21chr1_C_albicans_SC5314	3149380	3150122	MSPC_Peak_226;ID=orf19.7239;Name=orf19.7239;Peak-3148098-3150328;Summit-3149489-3149490;Dist-0	79.722	-	orf19.7239
Ca21chr1_C_albicans_SC5314	3149380	3150122	MSPC_Peak_226;ID=orf19.7239;Name=orf19.7239;Peak-3148098-3150328;Summit-3149546-3149547;Dist-0	79.722	-	orf19.7239
Ca21chr1_C_albicans_SC5314	3160034	3160667	MSPC_Peak_219;ID=orf19.7247;Name=orf19.7247;Peak-3158672-3160657;Summit-3160034-3160035;Dist-0	13	-	orf19.7247
Ca21chr1_C_albicans_SC5314	3160980	3161453	MSPC_Peak_194;ID=orf19.7247;Name=orf19.7247;Peak-3158672-3160657;Summit-3161131-3161134;Dist--475	inf	-	orf19.7247
Ca21chr1_C_albicans_SC5314	3160980	3161453	MSPC_Peak_194;ID=orf19.7247;Name=orf19.7247;Peak-3158672-3160657;Summit-3161221-3161222;Dist--565	inf	-	orf19.7247
Ca21chr1_C_albicans_SC5314	3181213	3182238	MSPC_Peak_187;ID=orf19.7271;Name=orf19.7271;Peak-3181309-3181629;Summit-3181545-3181546;Dist-0	129	+	orf19.7271
Ca21chr1_C_albicans_SC5314	3187228	3187761	MSPC_Peak_174;ID=orf19.7276.1;Name=orf19.7276.1;Peak-3186670-3186870;Summit-3187732-3187733;Dist--863	82	-	orf19.7276.1
Ca21chr2_C_albicans_SC5314	157	1402	MSPC_Peak_899;ID=orf19.1925;Name=orf19.1925;Peak-4248-4778;Summit-601-602;Dist--3647	149.199	+	orf19.1925
Ca21chr2_C_albicans_SC5314	157	1402	MSPC_Peak_899;ID=orf19.1925;Name=orf19.1925;Peak-4248-4778;Summit-640-641;Dist--3608	149.199	+	orf19.1925
Ca21chr2_C_albicans_SC5314	157	1402	MSPC_Peak_899;ID=orf19.1925;Name=orf19.1925;Peak-4248-4778;Summit-1005-1006;Dist--3243	149.199	+	orf19.1925
Ca21chr2_C_albicans_SC5314	4066	4480	MSPC_Peak_867;ID=orf19.1925;Name=orf19.1925;Peak-4248-4778;Summit-4190-4191;Dist--58	49	+	orf19.1925
Ca21chr2_C_albicans_SC5314	13158	13500	MSPC_Peak_860;ID=orf19.1911;Name=orf19.1911;Peak-13261-14415;Summit-13280-13281;Dist-0	28	-	orf19.1911
Ca21chr2_C_albicans_SC5314	15423	15728	MSPC_Peak_855;ID=orf19.1907;Name=orf19.1907;Peak-15457-17610;Summit-15688-15689;Dist-0	31	-	orf19.1907
Ca21chr2_C_albicans_SC5314	17895	18520	MSPC_Peak_851;ID=orf19.1907;Name=orf19.1907;Peak-15457-17610;Summit-18115-18147;Dist--506	inf	-	orf19.1907
Ca21chr2_C_albicans_SC5314	22598	22947	MSPC_Peak_845;ID=orf19.2117;Name=orf19.2117;Peak-21541-22767;Summit-22657-22658;Dist-0	33	+	orf19.2117
Ca21chr2_C_albicans_SC5314	28775	29072	MSPC_Peak_839;ID=orf19.2111;Name=orf19.2111;Peak-28906-30051;Summit-29006-29007;Dist-0	22	-	orf19.2111
Ca21chr2_C_albicans_SC5314	33339	33940	MSPC_Peak_834;ID=orf19.2108;Name=orf19.2108;Peak-31637-32587;Summit-33630-33648;Dist--1044	229.271	-	orf19.2108
Ca21chr2_C_albicans_SC5314	38841	39480	MSPC_Peak_829;ID=orf19.2099;Name=orf19.2099;Peak-39156-41945;Summit-39279-39280;Dist-0	38	-	orf19.2099
Ca21chr2_C_albicans_SC5314	93206	93592	MSPC_Peak_824;ID=orf19.2069;Name=orf19.2069;Peak-92559-94103;Summit-93226-93227;Dist-0	17	-	orf19.2069
Ca21chr2_C_albicans_SC5314	112605	113652	MSPC_Peak_820;ID=orf19.2060;Name=orf19.2060;Peak-111326-112012;Summit-112846-112847;Dist--835	inf	-	orf19.2060
Ca21chr2_C_albicans_SC5314	112605	113652	MSPC_Peak_820;ID=orf19.2060;Name=orf19.2060;Peak-111326-112012;Summit-112872-112873;Dist--861	inf	-	orf19.2060
Ca21chr2_C_albicans_SC5314	112605	113652	MSPC_Peak_820;ID=orf19.2060;Name=orf19.2060;Peak-111326-112012;Summit-112904-112905;Dist--893	inf	-	orf19.2060
Ca21chr2_C_albicans_SC5314	123071	123611	MSPC_Peak_815;ID=orf19.2054;Name=orf19.2054;Peak-121294-122850;Summit-123164-123165;Dist--315	175.386	-	orf19.2054
Ca21chr2_C_albicans_SC5314	123071	123611	MSPC_Peak_815;ID=orf19.2054;Name=orf19.2054;Peak-121294-122850;Summit-123501-123502;Dist--652	175.386	-	orf19.2054
Ca21chr2_C_albicans_SC5314	158531	159482	MSPC_Peak_808;ID=orf19.2026;Name=orf19.2026;Peak-158693-160795;Summit-158703-158704;Dist-0	77	-	orf19.2026
Ca21chr2_C_albicans_SC5314	180810	181472	MSPC_Peak_803;ID=orf19.2013;Name=orf19.2013;Peak-180800-182863;Summit-181118-181119;Dist-0	61.829	+	orf19.2013
Ca21chr2_C_albicans_SC5314	180810	181472	MSPC_Peak_803;ID=orf19.2013;Name=orf19.2013;Peak-180800-182863;Summit-181335-181336;Dist-0	61.829	+	orf19.2013
Ca21chr2_C_albicans_SC5314	204058	204635	MSPC_Peak_798;ID=orf19.2002;Name=orf19.2002;Peak-204929-207811;Summit-204386-204388;Dist--542	239.253	+	orf19.2002
Ca21chr2_C_albicans_SC5314	216709	217124	MSPC_Peak_795;ID=tL(UAA)1;Name=tL(UAA)1;Peak-216930-217045;Summit-216954-216955;Dist-0	inf	-	tL(UAA)1
Ca21chr2_C_albicans_SC5314	216709	217124	MSPC_Peak_795;ID=tL(UAA)1;Name=tL(UAA)1;Peak-216930-217045;Summit-216988-216994;Dist-0	inf	-	tL(UAA)1
Ca21chr2_C_albicans_SC5314	219187	219855	MSPC_Peak_785;ID=orf19.1995;Name=orf19.1995;Peak-219320-221449;Summit-219466-219467;Dist-0	96	-	orf19.1995
Ca21chr2_C_albicans_SC5314	220094	221160	MSPC_Peak_784;ID=orf19.1995;Name=orf19.1995;Peak-219320-221449;Summit-220184-220185;Dist-0	38	-	orf19.1995
Ca21chr2_C_albicans_SC5314	227813	228583	MSPC_Peak_782;ID=orf19.1992;Name=orf19.1992;Peak-227572-229131;Summit-227956-227957;Dist-0	66	-	orf19.1992
Ca21chr2_C_albicans_SC5314	229314	230093	MSPC_Peak_781;ID=orf19.1992;Name=orf19.1992;Peak-227572-229131;Summit-229549-229566;Dist--419	inf	-	orf19.1992
Ca21chr2_C_albicans_SC5314	230891	231876	MSPC_Peak_780;ID=orf19.1991;Name=orf19.1991;Peak-230504-232237;Summit-231273-231274;Dist-0	74.749	+	orf19.1991
Ca21chr2_C_albicans_SC5314	230891	231876	MSPC_Peak_780;ID=orf19.1991;Name=orf19.1991;Peak-230504-232237;Summit-231460-231461;Dist-0	74.749	+	orf19.1991
Ca21chr2_C_albicans_SC5314	248842	249376	MSPC_Peak_779;ID=orf19.1446;Name=orf19.1446;Peak-249030-250508;Summit-249342-249343;Dist-0	17	-	orf19.1446
Ca21chr2_C_albicans_SC5314	251864	252724	MSPC_Peak_778;ID=orf19.1446;Name=orf19.1446;Peak-249030-250508;Summit-252422-252423;Dist--1915	inf	-	orf19.1446
Ca21chr2_C_albicans_SC5314	251864	252724	MSPC_Peak_778;ID=orf19.1446;Name=orf19.1446;Peak-249030-250508;Summit-252444-252445;Dist--1937	inf	-	orf19.1446
Ca21chr2_C_albicans_SC5314	251864	252724	MSPC_Peak_778;ID=orf19.1446;Name=orf19.1446;Peak-249030-250508;Summit-252505-252506;Dist--1998	inf	-	orf19.1446
Ca21chr2_C_albicans_SC5314	253213	253566	MSPC_Peak_777;ID=orf19.1446;Name=orf19.1446;Peak-249030-250508;Summit-253293-253294;Dist--2786	72.76	-	orf19.1446
Ca21chr2_C_albicans_SC5314	253213	253566	MSPC_Peak_777;ID=orf19.1446;Name=orf19.1446;Peak-249030-250508;Summit-253477-253478;Dist--2970	72.76	-	orf19.1446
Ca21chr2_C_albicans_SC5314	284366	285329	MSPC_Peak_776;ID=orf19.1471;Name=orf19.1471;Peak-289905-290378;Summit-284824-284825;Dist--5081	70.772	+	orf19.1471
Ca21chr2_C_albicans_SC5314	284366	285329	MSPC_Peak_776;ID=orf19.1471;Name=orf19.1471;Peak-289905-290378;Summit-284949-284950;Dist--4956	70.772	+	orf19.1471
Ca21chr2_C_albicans_SC5314	288233	288601	MSPC_Peak_774;ID=orf19.1470;Name=orf19.1470;Peak-287869-288228;Summit-288233-288234;Dist--6	13	-	orf19.1470
Ca21chr2_C_albicans_SC5314	289941	290687	MSPC_Peak_771;ID=orf19.1471;Name=orf19.1471;Peak-289905-290378;Summit-290376-290377;Dist-0	83	+	orf19.1471
Ca21chr2_C_albicans_SC5314	305985	306231	MSPC_Peak_769;ID=orf19.1479;Name=orf19.1479;Peak-301880-304222;Summit-306167-306168;Dist--1946	26	-	orf19.1479
Ca21chr2_C_albicans_SC5314	314863	315114	MSPC_Peak_767;ID=orf19.1486;Name=orf19.1486;Peak-314676-315173;Summit-314923-314924;Dist-0	19	-	orf19.1486
Ca21chr2_C_albicans_SC5314	320211	320623	MSPC_Peak_765;ID=orf19.1486;Name=orf19.1486;Peak-314676-315173;Summit-320372-320373;Dist--5200	inf	-	orf19.1486
Ca21chr2_C_albicans_SC5314	320211	320623	MSPC_Peak_765;ID=orf19.1486;Name=orf19.1486;Peak-314676-315173;Summit-320400-320403;Dist--5228	inf	-	orf19.1486
Ca21chr2_C_albicans_SC5314	323324	324739	MSPC_Peak_748;ID=tL(CAA)1;Name=tL(CAA)1;Peak-323401-323519;Summit-323457-323483;Dist-0	inf	-	tL(CAA)1
Ca21chr2_C_albicans_SC5314	325019	326032	MSPC_Peak_742;ID=tL(CAA)1;Name=tL(CAA)1;Peak-323401-323519;Summit-325275-325284;Dist--1757	inf	-	tL(CAA)1
Ca21chr2_C_albicans_SC5314	360690	361137	MSPC_Peak_735;ID=orf19.1505;Name=orf19.1505;Peak-360900-361937;Summit-361056-361057;Dist-0	23	-	orf19.1505
Ca21chr2_C_albicans_SC5314	407478	407961	MSPC_Peak_728;ID=snR48;Name=snR48;Peak-407520-407623;Summit-407621-407622;Dist-0	49.121	+	snR48
Ca21chr2_C_albicans_SC5314	407478	407961	MSPC_Peak_728;ID=orf19.1525;Name=orf19.1525;Peak-408210-409406;Summit-407648-407653;Dist--558	49.121	+	orf19.1525
Ca21chr2_C_albicans_SC5314	433334	433576	MSPC_Peak_723;ID=orf19.1536;Name=orf19.1536;Peak-433195-434631;Summit-433364-433365;Dist-0	20	+	orf19.1536
Ca21chr2_C_albicans_SC5314	434300	434549	MSPC_Peak_718;ID=orf19.1536;Name=orf19.1536;Peak-433195-434631;Summit-434456-434457;Dist-0	34	+	orf19.1536
Ca21chr2_C_albicans_SC5314	456246	456528	MSPC_Peak_713;ID=orf19.1544;Name=orf19.1544;Peak-455598-456395;Summit-456388-456389;Dist-0	40	+	orf19.1544
Ca21chr2_C_albicans_SC5314	489079	489393	MSPC_Peak_707;ID=orf19.1569;Name=orf19.1569;Peak-487896-491423;Summit-489183-489184;Dist-0	50	-	orf19.1569
Ca21chr2_C_albicans_SC5314	496109	496335	MSPC_Peak_701;ID=tV(AAC)1;Name=tV(AAC)1;Peak-496197-496270;Summit-496238-496239;Dist-0	201	+	tV(AAC)1
Ca21chr2_C_albicans_SC5314	522994	523352	MSPC_Peak_696;ID=orf19.1585;Name=orf19.1585;Peak-524084-525196;Summit-523141-523153;Dist--932	inf	+	orf19.1585
Ca21chr2_C_albicans_SC5314	524451	525240	MSPC_Peak_691;ID=orf19.1588;Name=orf19.1588;Peak-529140-529559;Summit-525202-525203;Dist--3938	40	+	orf19.1588
Ca21chr2_C_albicans_SC5314	539444	539752	MSPC_Peak_687;ID=orf19.5838;Name=orf19.5838;Peak-539009-539914;Summit-539640-539641;Dist-0	59	+	orf19.5838
Ca21chr2_C_albicans_SC5314	543810	544290	MSPC_Peak_682;ID=orf19.5834;Name=orf19.5834;Peak-542346-545354;Summit-543810-543811;Dist-0	13	+	orf19.5834
Ca21chr2_C_albicans_SC5314	570777	571102	MSPC_Peak_677;ID=orf19.5820;Name=orf19.5820;Peak-570159-571793;Summit-570962-570963;Dist-0	54	+	orf19.5820
Ca21chr2_C_albicans_SC5314	571348	571758	MSPC_Peak_673;ID=orf19.5820;Name=orf19.5820;Peak-570159-571793;Summit-571522-571523;Dist-0	60	+	orf19.5820
Ca21chr2_C_albicans_SC5314	572960	573663	MSPC_Peak_654;ID=orf19.5818;Name=orf19.5818;Peak-573007-574035;Summit-573581-573582;Dist-0	57	+	orf19.5818
Ca21chr2_C_albicans_SC5314	573919	574298	MSPC_Peak_650;ID=orf19.5818;Name=orf19.5818;Peak-573007-574035;Summit-573987-573988;Dist-0	40	+	orf19.5818
Ca21chr2_C_albicans_SC5314	583599	584519	MSPC_Peak_647;ID=orf19.5813;Name=orf19.5813;Peak-583289-583846;Summit-583837-583838;Dist-0	108.591	+	orf19.5813
Ca21chr2_C_albicans_SC5314	583599	584519	MSPC_Peak_647;ID=orf19.5812;Name=orf19.5812;Peak-584262-585527;Summit-584373-584374;Dist-0	108.591	-	orf19.5812
Ca21chr2_C_albicans_SC5314	603232	604796	MSPC_Peak_643;ID=orf19.5801;Name=orf19.5801;Peak-603543-604784;Summit-603819-603820;Dist-0	64	-	orf19.5801
Ca21chr2_C_albicans_SC5314	606289	606648	MSPC_Peak_640;ID=orf19.5799;Name=orf19.5799;Peak-606248-608308;Summit-606622-606623;Dist-0	25	-	orf19.5799
Ca21chr2_C_albicans_SC5314	617928	618182	MSPC_Peak_637;ID=orf19.5793;Name=orf19.5793;Peak-616968-618203;Summit-618138-618139;Dist-0	50	+	orf19.5793
Ca21chr2_C_albicans_SC5314	675914	676776	MSPC_Peak_635;ID=orf19.903;Name=orf19.903;Peak-675910-676656;Summit-676504-676505;Dist-0	38	+	orf19.903
Ca21chr2_C_albicans_SC5314	732298	732729	MSPC_Peak_633;ID=orf19.872;Name=orf19.872;Peak-725313-726593;Summit-732480-732502;Dist--5888	inf	-	orf19.872
Ca21chr2_C_albicans_SC5314	735614	736001	MSPC_Peak_631;ID=orf19.872;Name=orf19.872;Peak-725313-726593;Summit-735817-735828;Dist--9225	inf	-	orf19.872
Ca21chr2_C_albicans_SC5314	737217	738012	MSPC_Peak_630;ID=orf19.867;Name=orf19.867;Peak-747283-748896;Summit-737604-737618;Dist--9666	inf	+	orf19.867
Ca21chr2_C_albicans_SC5314	739124	740014	MSPC_Peak_629;ID=orf19.867;Name=orf19.867;Peak-747283-748896;Summit-739458-739467;Dist--7817	inf	+	orf19.867
Ca21chr2_C_albicans_SC5314	739124	740014	MSPC_Peak_629;ID=orf19.867;Name=orf19.867;Peak-747283-748896;Summit-739492-739493;Dist--7791	inf	+	orf19.867
Ca21chr2_C_albicans_SC5314	771682	772060	MSPC_Peak_625;ID=tE(CUC)1;Name=tE(CUC)1;Peak-771813-771884;Summit-771843-771861;Dist-0	inf	+	tE(CUC)1
Ca21chr2_C_albicans_SC5314	781134	781389	MSPC_Peak_621;ID=orf19.850;Name=orf19.850;Peak-782312-783436;Summit-781241-781242;Dist--1071	277.19	+	orf19.850
Ca21chr2_C_albicans_SC5314	781134	781389	MSPC_Peak_621;ID=orf19.850;Name=orf19.850;Peak-782312-783436;Summit-781275-781276;Dist--1037	277.19	+	orf19.850
Ca21chr2_C_albicans_SC5314	790194	790511	MSPC_Peak_618;ID=tF(GAA)2;Name=tF(GAA)2;Peak-790342-790429;Summit-790344-790356;Dist-0	inf	+	tF(GAA)2
Ca21chr2_C_albicans_SC5314	801818	802203	MSPC_Peak_612;ID=orf19.842;Name=orf19.842;Peak-801181-801525;Summit-801913-801914;Dist--389	97	-	orf19.842
Ca21chr2_C_albicans_SC5314	804527	805295	MSPC_Peak_586;ID=orf19.840;Name=orf19.840;Peak-804502-805314;Summit-804608-804609;Dist-0	49	-	orf19.840
Ca21chr2_C_albicans_SC5314	805667	805926	MSPC_Peak_579;ID=orf19.838.1;Name=orf19.838.1;Peak-805800-806857;Summit-805887-805888;Dist-0	24	-	orf19.838.1
Ca21chr2_C_albicans_SC5314	806193	806872	MSPC_Peak_573;ID=orf19.838.1;Name=orf19.838.1;Peak-805800-806857;Summit-806314-806334;Dist-0	52.894	-	orf19.838.1
Ca21chr2_C_albicans_SC5314	810364	810641	MSPC_Peak_570;ID=tR(UCU)3;Name=tR(UCU)3;Peak-810413-810485;Summit-810478-810479;Dist-0	inf	+	tR(UCU)3
Ca21chr2_C_albicans_SC5314	810364	810641	MSPC_Peak_570;ID=tF(GAA)3;Name=tF(GAA)3;Peak-810492-810579;Summit-810532-810533;Dist-0	inf	+	tF(GAA)3
Ca21chr2_C_albicans_SC5314	828131	828829	MSPC_Peak_564;ID=orf19.829;Name=orf19.829;Peak-825527-827890;Summit-828244-828246;Dist--355	inf	-	orf19.829
Ca21chr2_C_albicans_SC5314	829454	829733	MSPC_Peak_561;ID=orf19.828;Name=orf19.828;Peak-830516-831313;Summit-829559-829560;Dist--957	260.725	+	orf19.828
Ca21chr2_C_albicans_SC5314	829454	829733	MSPC_Peak_561;ID=orf19.828;Name=orf19.828;Peak-830516-831313;Summit-829602-829603;Dist--914	260.725	+	orf19.828
Ca21chr2_C_albicans_SC5314	829454	829733	MSPC_Peak_561;ID=orf19.828;Name=orf19.828;Peak-830516-831313;Summit-829643-829644;Dist--873	260.725	+	orf19.828
Ca21chr2_C_albicans_SC5314	830934	831275	MSPC_Peak_558;ID=orf19.828;Name=orf19.828;Peak-830516-831313;Summit-831118-831119;Dist-0	91	+	orf19.828
Ca21chr2_C_albicans_SC5314	832113	832682	MSPC_Peak_555;ID=orf19.827;Name=orf19.827;Peak-832828-833565;Summit-832506-832507;Dist--322	54	+	orf19.827
Ca21chr2_C_albicans_SC5314	833829	834444	MSPC_Peak_554;ID=orf19.826;Name=orf19.826;Peak-834090-835946;Summit-834166-834167;Dist-0	88	-	orf19.826
Ca21chr2_C_albicans_SC5314	852994	853307	MSPC_Peak_552;ID=orf19.815;Name=orf19.815;Peak-847659-853403;Summit-853071-853072;Dist-0	23	-	orf19.815
Ca21chr2_C_albicans_SC5314	853938	854790	MSPC_Peak_551;ID=orf19.815;Name=orf19.815;Peak-847659-853403;Summit-854152-854174;Dist--750	295.163	-	orf19.815
Ca21chr2_C_albicans_SC5314	857559	858090	MSPC_Peak_549;ID=SNRNAU2;Name=SNRNAU2;Peak-857832-858046;Summit-857856-857857;Dist-0	inf	-	SNRNAU2
Ca21chr2_C_albicans_SC5314	857559	858090	MSPC_Peak_549;ID=SNRNAU2;Name=SNRNAU2;Peak-857832-858046;Summit-857898-857899;Dist-0	inf	-	SNRNAU2
Ca21chr2_C_albicans_SC5314	876342	876849	MSPC_Peak_547;ID=orf19.806;Name=orf19.806;Peak-874972-875328;Summit-876716-876717;Dist--1389	23	-	orf19.806
Ca21chr2_C_albicans_SC5314	899651	900124	MSPC_Peak_544;ID=orf19.792;Name=orf19.792;Peak-897896-900774;Summit-899916-899917;Dist-0	33	+	orf19.792
Ca21chr2_C_albicans_SC5314	900578	901020	MSPC_Peak_513;ID=orf19.1591;Name=orf19.1591;Peak-902615-903823;Summit-900877-900878;Dist--1738	43	+	orf19.1591
Ca21chr2_C_albicans_SC5314	902649	904006	MSPC_Peak_507;ID=orf19.1591;Name=orf19.1591;Peak-902615-903823;Summit-903655-903656;Dist-0	67	+	orf19.1591
Ca21chr2_C_albicans_SC5314	921192	921538	MSPC_Peak_500;ID=orf19.4513;Name=orf19.4513;Peak-920896-922086;Summit-921388-921389;Dist-0	19	+	orf19.4513
Ca21chr2_C_albicans_SC5314	942113	942563	MSPC_Peak_494;ID=orf19.4502;Name=orf19.4502;Peak-940777-946524;Summit-942420-942421;Dist-0	46	+	orf19.4502
Ca21chr2_C_albicans_SC5314	942822	943172	MSPC_Peak_489;ID=orf19.4502;Name=orf19.4502;Peak-940777-946524;Summit-943035-943036;Dist-0	50	+	orf19.4502
Ca21chr2_C_albicans_SC5314	945317	945684	MSPC_Peak_485;ID=orf19.4502;Name=orf19.4502;Peak-940777-946524;Summit-945421-945422;Dist-0	50	+	orf19.4502
Ca21chr2_C_albicans_SC5314	959556	959898	MSPC_Peak_481;ID=orf19.4491;Name=orf19.4491;Peak-958692-959747;Summit-959665-959666;Dist-0	54	+	orf19.4491
Ca21chr2_C_albicans_SC5314	960999	961352	MSPC_Peak_476;ID=orf19.4490.2;Name=orf19.4490.2;Peak-959964-960251;Summit-961283-961284;Dist--1033	114	-	orf19.4490.2
Ca21chr2_C_albicans_SC5314	961601	961954	MSPC_Peak_469;ID=orf19.4490;Name=orf19.4490;Peak-961440-961997;Summit-961603-961604;Dist-0	14	-	orf19.4490
Ca21chr2_C_albicans_SC5314	968158	968563	MSPC_Peak_463;ID=orf19.4488;Name=orf19.4488;Peak-965502-968417;Summit-968265-968266;Dist-0	24	+	orf19.4488
Ca21chr2_C_albicans_SC5314	1023726	1025183	MSPC_Peak_460;ID=tD(GUC)5;Name=tD(GUC)5;Peak-1024084-1024155;Summit-1024387-1024408;Dist--233	inf	-	tD(GUC)5
Ca21chr2_C_albicans_SC5314	1026453	1027405	MSPC_Peak_456;ID=tG(GCC)3;Name=tG(GCC)3;Peak-1027235-1027305;Summit-1027178-1027180;Dist--56	inf	+	tG(GCC)3
Ca21chr2_C_albicans_SC5314	1026453	1027405	MSPC_Peak_456;ID=tG(GCC)3;Name=tG(GCC)3;Peak-1027235-1027305;Summit-1027219-1027220;Dist--16	inf	+	tG(GCC)3
Ca21chr2_C_albicans_SC5314	1032912	1033348	MSPC_Peak_451;ID=orf19.3527;Name=orf19.3527;Peak-1032918-1033784;Summit-1033219-1033220;Dist-0	18	-	orf19.3527
Ca21chr2_C_albicans_SC5314	1077372	1079223	MSPC_Peak_446;ID=tQ(UUG)3;Name=tQ(UUG)3;Peak-1077471-1077556;Summit-1077514-1077530;Dist-0	inf	-	tQ(UUG)3
Ca21chr2_C_albicans_SC5314	1077372	1079223	MSPC_Peak_446;ID=orf19.3554;Name=orf19.3554;Peak-1077830-1079143;Summit-1078573-1078574;Dist-0	inf	-	orf19.3554
Ca21chr2_C_albicans_SC5314	1082368	1082680	MSPC_Peak_418;ID=orf19.3555;Name=orf19.3555;Peak-1083888-1086293;Summit-1082534-1082535;Dist--1354	113	+	orf19.3555
Ca21chr2_C_albicans_SC5314	1091718	1092299	MSPC_Peak_415;ID=orf19.3558;Name=orf19.3558;Peak-1090856-1091497;Summit-1091868-1091869;Dist--372	27	-	orf19.3558
Ca21chr2_C_albicans_SC5314	1092594	1092869	MSPC_Peak_411;ID=orf19.3559;Name=orf19.3559;Peak-1091873-1093099;Summit-1092818-1092819;Dist-0	36	-	orf19.3559
Ca21chr2_C_albicans_SC5314	1110519	1110863	MSPC_Peak_407;ID=orf19.3572.3;Name=orf19.3572.3;Peak-1110528-1111348;Summit-1110861-1110862;Dist-0	14	+	orf19.3572.3
Ca21chr2_C_albicans_SC5314	1111104	1111661	MSPC_Peak_402;ID=orf19.3573;Name=orf19.3573;Peak-1112926-1116399;Summit-1111522-1111523;Dist--1404	128	+	orf19.3573
Ca21chr2_C_albicans_SC5314	1112183	1112556	MSPC_Peak_397;ID=tI(AAU)3;Name=tI(AAU)3;Peak-1112294-1112380;Summit-1112333-1112346;Dist-0	inf	-	tI(AAU)3
Ca21chr2_C_albicans_SC5314	1118745	1119298	MSPC_Peak_393;ID=orf19.3575;Name=orf19.3575;Peak-1118746-1120260;Summit-1119283-1119284;Dist-0	26	+	orf19.3575
Ca21chr2_C_albicans_SC5314	1120179	1120415	MSPC_Peak_387;ID=orf19.3575;Name=orf19.3575;Peak-1118746-1120260;Summit-1120181-1120182;Dist-0	19	+	orf19.3575
Ca21chr2_C_albicans_SC5314	1132912	1133520	MSPC_Peak_381;ID=orf19.6869;Name=orf19.6869;Peak-1130953-1132002;Summit-1133158-1133183;Dist--1157	inf	-	orf19.6869
Ca21chr2_C_albicans_SC5314	1143836	1144101	MSPC_Peak_375;ID=tS(AGA)4;Name=tS(AGA)4;Peak-1143939-1144020;Summit-1143952-1143975;Dist-0	inf	-	tS(AGA)4
Ca21chr2_C_albicans_SC5314	1145783	1146877	MSPC_Peak_373;ID=tS(AGA)4;Name=tS(AGA)4;Peak-1143939-1144020;Summit-1146662-1146664;Dist--2643	inf	-	tS(AGA)4
Ca21chr2_C_albicans_SC5314	1145783	1146877	MSPC_Peak_373;ID=tS(AGA)4;Name=tS(AGA)4;Peak-1143939-1144020;Summit-1146692-1146693;Dist--2673	inf	-	tS(AGA)4
Ca21chr2_C_albicans_SC5314	1164056	1164484	MSPC_Peak_366;ID=orf19.6881;Name=orf19.6881;Peak-1164161-1164808;Summit-1164207-1164208;Dist-0	38	-	orf19.6881
Ca21chr2_C_albicans_SC5314	1165417	1168106	MSPC_Peak_361;ID=orf19.6881;Name=orf19.6881;Peak-1164161-1164808;Summit-1167252-1167253;Dist--2445	149	-	orf19.6881
Ca21chr2_C_albicans_SC5314	1208415	1208692	MSPC_Peak_356;ID=orf19.5213;Name=orf19.5213;Peak-1208528-1210972;Summit-1208506-1208507;Dist--22	33	+	orf19.5213
Ca21chr2_C_albicans_SC5314	1210781	1211231	MSPC_Peak_351;ID=orf19.5213;Name=orf19.5213;Peak-1208528-1210972;Summit-1210924-1210925;Dist-0	43	+	orf19.5213
Ca21chr2_C_albicans_SC5314	1212150	1212549	MSPC_Peak_337;ID=orf19.5214;Name=orf19.5214;Peak-1212306-1214402;Summit-1212361-1212362;Dist-0	139.484	-	orf19.5214
Ca21chr2_C_albicans_SC5314	1212150	1212549	MSPC_Peak_337;ID=orf19.5214;Name=orf19.5214;Peak-1212306-1214402;Summit-1212388-1212389;Dist-0	139.484	-	orf19.5214
Ca21chr2_C_albicans_SC5314	1232760	1233926	MSPC_Peak_333;ID=orf19.4118;Name=orf19.4118;Peak-1232842-1234668;Summit-1233912-1233913;Dist-0	20	+	orf19.4118
Ca21chr2_C_albicans_SC5314	1234391	1234912	MSPC_Peak_330;ID=orf19.4118;Name=orf19.4118;Peak-1232842-1234668;Summit-1234624-1234625;Dist-0	162	+	orf19.4118
Ca21chr2_C_albicans_SC5314	1237782	1238106	MSPC_Peak_325;ID=tM(CAU)3;Name=tM(CAU)3;Peak-1237930-1238003;Summit-1237943-1237950;Dist-0	inf	-	tM(CAU)3
Ca21chr2_C_albicans_SC5314	1280572	1280977	MSPC_Peak_322;ID=orf19.5493;Name=orf19.5493;Peak-1280747-1281391;Summit-1280879-1280880;Dist-0	41	-	orf19.5493
Ca21chr2_C_albicans_SC5314	1302161	1302556	MSPC_Peak_315;ID=orf19.18;Name=orf19.18;Peak-1302340-1304152;Summit-1302472-1302473;Dist-0	78	-	orf19.18
Ca21chr2_C_albicans_SC5314	1303580	1304247	MSPC_Peak_311;ID=orf19.18;Name=orf19.18;Peak-1302340-1304152;Summit-1303697-1303698;Dist-0	97.636	-	orf19.18
Ca21chr2_C_albicans_SC5314	1303580	1304247	MSPC_Peak_311;ID=orf19.18;Name=orf19.18;Peak-1302340-1304152;Summit-1303889-1303890;Dist-0	97.636	-	orf19.18
Ca21chr2_C_albicans_SC5314	1321355	1321718	MSPC_Peak_309;ID=tI(AAU)1;Name=tI(AAU)1;Peak-1321524-1321610;Summit-1321565-1321586;Dist-0	inf	+	tI(AAU)1
Ca21chr2_C_albicans_SC5314	1332709	1333262	MSPC_Peak_305;ID=orf19.33;Name=orf19.33;Peak-1332647-1332952;Summit-1333003-1333004;Dist--52	27	-	orf19.33
Ca21chr2_C_albicans_SC5314	1338186	1338525	MSPC_Peak_301;ID=orf19.34;Name=orf19.34;Peak-1334306-1335865;Summit-1338320-1338321;Dist--2456	239.253	-	orf19.34
Ca21chr2_C_albicans_SC5314	1338186	1338525	MSPC_Peak_301;ID=orf19.34;Name=orf19.34;Peak-1334306-1335865;Summit-1338348-1338349;Dist--2484	239.253	-	orf19.34
Ca21chr2_C_albicans_SC5314	1339542	1339954	MSPC_Peak_296;ID=orf19.35;Name=orf19.35;Peak-1341149-1344079;Summit-1339662-1339663;Dist--1487	inf	+	orf19.35
Ca21chr2_C_albicans_SC5314	1339542	1339954	MSPC_Peak_296;ID=orf19.35;Name=orf19.35;Peak-1341149-1344079;Summit-1339710-1339711;Dist--1439	inf	+	orf19.35
Ca21chr2_C_albicans_SC5314	1339542	1339954	MSPC_Peak_296;ID=orf19.35;Name=orf19.35;Peak-1341149-1344079;Summit-1339768-1339769;Dist--1381	inf	+	orf19.35
Ca21chr2_C_albicans_SC5314	1343978	1344245	MSPC_Peak_292;ID=orf19.35;Name=orf19.35;Peak-1341149-1344079;Summit-1343993-1343994;Dist-0	22	+	orf19.35
Ca21chr2_C_albicans_SC5314	1350985	1351364	MSPC_Peak_288;ID=orf19.1295;Name=orf19.1295;Peak-1350991-1354350;Summit-1351227-1351228;Dist-0	15	-	orf19.1295
Ca21chr2_C_albicans_SC5314	1352022	1352863	MSPC_Peak_284;ID=orf19.1295;Name=orf19.1295;Peak-1350991-1354350;Summit-1352586-1352587;Dist-0	42	-	orf19.1295
Ca21chr2_C_albicans_SC5314	1363089	1363394	MSPC_Peak_269;ID=orf19.1224;Name=orf19.1224;Peak-1365218-1366075;Summit-1363186-1363187;Dist--2032	91.663	+	orf19.1224
Ca21chr2_C_albicans_SC5314	1363089	1363394	MSPC_Peak_269;ID=orf19.1224;Name=orf19.1224;Peak-1365218-1366075;Summit-1363307-1363308;Dist--1911	91.663	+	orf19.1224
Ca21chr2_C_albicans_SC5314	1363976	1364395	MSPC_Peak_265;ID=orf19.1224;Name=orf19.1224;Peak-1365218-1366075;Summit-1364082-1364083;Dist--1136	124.352	+	orf19.1224
Ca21chr2_C_albicans_SC5314	1363976	1364395	MSPC_Peak_265;ID=orf19.1224;Name=orf19.1224;Peak-1365218-1366075;Summit-1364328-1364335;Dist--884	124.352	+	orf19.1224
Ca21chr2_C_albicans_SC5314	1376669	1378513	MSPC_Peak_260;ID=orf19.3150;Name=orf19.3150;Peak-1376462-1377499;Summit-1377065-1377066;Dist-0	inf	+	orf19.3150
Ca21chr2_C_albicans_SC5314	1376669	1378513	MSPC_Peak_260;ID=orf19.3149;Name=orf19.3149;Peak-1379510-1380463;Summit-1377825-1377826;Dist--1685	inf	+	orf19.3149
Ca21chr2_C_albicans_SC5314	1376669	1378513	MSPC_Peak_260;ID=orf19.3149;Name=orf19.3149;Peak-1379510-1380463;Summit-1377972-1377986;Dist--1525	inf	+	orf19.3149
Ca21chr2_C_albicans_SC5314	1379515	1380375	MSPC_Peak_255;ID=orf19.3149;Name=orf19.3149;Peak-1379510-1380463;Summit-1380338-1380339;Dist-0	17	+	orf19.3149
Ca21chr2_C_albicans_SC5314	1395430	1396096	MSPC_Peak_251;ID=orf19.2232;Name=orf19.2232;Peak-1395602-1396519;Summit-1395680-1395681;Dist-0	184.365	-	orf19.2232
Ca21chr2_C_albicans_SC5314	1395430	1396096	MSPC_Peak_251;ID=orf19.2232;Name=orf19.2232;Peak-1395602-1396519;Summit-1395762-1395763;Dist-0	184.365	-	orf19.2232
Ca21chr2_C_albicans_SC5314	1396896	1397255	MSPC_Peak_247;ID=orf19.2233;Name=orf19.2233;Peak-1396879-1397736;Summit-1396961-1396962;Dist-0	34	-	orf19.2233
Ca21chr2_C_albicans_SC5314	1404775	1405163	MSPC_Peak_245;ID=orf19.2237.1;Name=orf19.2237.1;Peak-1404372-1405051;Summit-1405023-1405024;Dist-0	31	+	orf19.2237.1
Ca21chr2_C_albicans_SC5314	1459375	1460025	MSPC_Peak_240;ID=orf19.2270;Name=orf19.2270;Peak-1460029-1461783;Summit-1459460-1459461;Dist--569	132.506	+	orf19.2270
Ca21chr2_C_albicans_SC5314	1459375	1460025	MSPC_Peak_240;ID=orf19.2270;Name=orf19.2270;Peak-1460029-1461783;Summit-1459718-1459719;Dist--311	132.506	+	orf19.2270
Ca21chr2_C_albicans_SC5314	1460722	1460957	MSPC_Peak_234;ID=orf19.2270;Name=orf19.2270;Peak-1460029-1461783;Summit-1460932-1460933;Dist-0	22	+	orf19.2270
Ca21chr2_C_albicans_SC5314	1461311	1461823	MSPC_Peak_228;ID=orf19.2270;Name=orf19.2270;Peak-1460029-1461783;Summit-1461491-1461492;Dist-0	45	+	orf19.2270
Ca21chr2_C_albicans_SC5314	1497593	1498324	MSPC_Peak_225;ID=orf19.1902;Name=orf19.1902;Peak-1498605-1500293;Summit-1497986-1497987;Dist--619	106.599	+	orf19.1902
Ca21chr2_C_albicans_SC5314	1497593	1498324	MSPC_Peak_225;ID=orf19.1902;Name=orf19.1902;Peak-1498605-1500293;Summit-1498033-1498034;Dist--572	106.599	+	orf19.1902
Ca21chr2_C_albicans_SC5314	1507008	1507473	MSPC_Peak_218;ID=orf19.1896;Name=orf19.1896;Peak-1506984-1508930;Summit-1507469-1507470;Dist-0	14	+	orf19.1896
Ca21chr2_C_albicans_SC5314	1508921	1509165	MSPC_Peak_215;ID=orf19.1890;Name=orf19.1890;Peak-1514712-1516178;Summit-1509028-1509029;Dist--5684	34	+	orf19.1890
Ca21chr2_C_albicans_SC5314	1546208	1547625	MSPC_Peak_212;ID=orf19.1868;Name=orf19.1868;Peak-1546130-1547314;Summit-1546786-1546787;Dist-0	44	+	orf19.1868
Ca21chr2_C_albicans_SC5314	1574038	1574359	MSPC_Peak_188;ID=orf19.2210;Name=orf19.2210;Peak-1572314-1574362;Summit-1574126-1574127;Dist-0	26	-	orf19.2210
Ca21chr2_C_albicans_SC5314	1574938	1575918	MSPC_Peak_186;ID=orf19.2210;Name=orf19.2210;Peak-1572314-1574362;Summit-1575159-1575177;Dist--798	inf	-	orf19.2210
Ca21chr2_C_albicans_SC5314	1600358	1600671	MSPC_Peak_182;ID=tM(CAU)2;Name=tM(CAU)2;Peak-1600445-1600516;Summit-1600487-1600492;Dist-0	inf	-	tM(CAU)2
Ca21chr2_C_albicans_SC5314	1608263	1608911	MSPC_Peak_180;ID=orf19.2192;Name=orf19.2192;Peak-1608435-1611605;Summit-1608879-1608880;Dist-0	33	+	orf19.2192
Ca21chr2_C_albicans_SC5314	1609222	1609532	MSPC_Peak_175;ID=orf19.2192;Name=orf19.2192;Peak-1608435-1611605;Summit-1609484-1609485;Dist-0	31	+	orf19.2192
Ca21chr2_C_albicans_SC5314	1610062	1611991	MSPC_Peak_170;ID=orf19.2192;Name=orf19.2192;Peak-1608435-1611605;Summit-1611247-1611248;Dist-0	inf	+	orf19.2192
Ca21chr2_C_albicans_SC5314	1610062	1611991	MSPC_Peak_170;ID=orf19.2192;Name=orf19.2192;Peak-1608435-1611605;Summit-1611316-1611328;Dist-0	inf	+	orf19.2192
Ca21chr2_C_albicans_SC5314	1620148	1620534	MSPC_Peak_167;ID=tI(AAU)2;Name=tI(AAU)2;Peak-1620320-1620406;Summit-1620341-1620342;Dist-0	inf	+	tI(AAU)2
Ca21chr2_C_albicans_SC5314	1620148	1620534	MSPC_Peak_167;ID=tI(AAU)2;Name=tI(AAU)2;Peak-1620320-1620406;Summit-1620366-1620379;Dist-0	inf	+	tI(AAU)2
Ca21chr2_C_albicans_SC5314	1621523	1621783	MSPC_Peak_164;ID=tA(AGC)1;Name=tA(AGC)1;Peak-1621657-1621729;Summit-1621686-1621687;Dist-0	128	+	tA(AGC)1
Ca21chr2_C_albicans_SC5314	1622304	1622749	MSPC_Peak_158;ID=orf19.2183;Name=orf19.2183;Peak-1621903-1623732;Summit-1622580-1622581;Dist-0	46	-	orf19.2183
Ca21chr2_C_albicans_SC5314	1633096	1634132	MSPC_Peak_154;ID=orf19.2179.2;Name=orf19.2179.2;Peak-1633446-1634121;Summit-1633448-1633449;Dist-0	160	-	orf19.2179.2
Ca21chr2_C_albicans_SC5314	1637789	1638319	MSPC_Peak_151;ID=RPR1;Name=RPR1;Peak-1637905-1638241;Summit-1638085-1638094;Dist-0	inf	+	RPR1
Ca21chr2_C_albicans_SC5314	1639119	1639355	MSPC_Peak_148;ID=orf19.2178;Name=orf19.2178;Peak-1638871-1639848;Summit-1639302-1639303;Dist-0	24	-	orf19.2178
Ca21chr2_C_albicans_SC5314	1649577	1650531	MSPC_Peak_146;ID=orf19.2170;Name=orf19.2170;Peak-1649472-1652255;Summit-1649961-1649962;Dist-0	37	-	orf19.2170
Ca21chr2_C_albicans_SC5314	1651172	1652208	MSPC_Peak_142;ID=orf19.2170;Name=orf19.2170;Peak-1649472-1652255;Summit-1651248-1651249;Dist-0	78.727	-	orf19.2170
Ca21chr2_C_albicans_SC5314	1651172	1652208	MSPC_Peak_142;ID=orf19.2170;Name=orf19.2170;Peak-1649472-1652255;Summit-1651743-1651744;Dist-0	78.727	-	orf19.2170
Ca21chr2_C_albicans_SC5314	1652819	1653473	MSPC_Peak_133;ID=orf19.2170;Name=orf19.2170;Peak-1649472-1652255;Summit-1653138-1653170;Dist--884	inf	-	orf19.2170
Ca21chr2_C_albicans_SC5314	1742387	1742681	MSPC_Peak_130;ID=orf19.3618;Name=orf19.3618;Peak-1747033-1748634;Summit-1742550-1742551;Dist--4483	inf	+	orf19.3618
Ca21chr2_C_albicans_SC5314	1752842	1753282	MSPC_Peak_127;ID=orf19.3616;Name=orf19.3616;Peak-1752011-1753357;Summit-1753017-1753018;Dist-0	63	+	orf19.3616
Ca21chr2_C_albicans_SC5314	1790229	1791014	MSPC_Peak_124;ID=orf19.3591;Name=orf19.3591;Peak-1788147-1789799;Summit-1790333-1790334;Dist--535	95.645	-	orf19.3591
Ca21chr2_C_albicans_SC5314	1790229	1791014	MSPC_Peak_124;ID=orf19.3590;Name=orf19.3590;Peak-1790450-1791316;Summit-1790492-1790493;Dist-0	95.645	-	orf19.3590
Ca21chr2_C_albicans_SC5314	1806423	1807057	MSPC_Peak_121;ID=orf19.218;Name=orf19.218;Peak-1807304-1807645;Summit-1806550-1806551;Dist--754	179.377	+	orf19.218
Ca21chr2_C_albicans_SC5314	1806423	1807057	MSPC_Peak_121;ID=orf19.218;Name=orf19.218;Peak-1807304-1807645;Summit-1806582-1806583;Dist--722	179.377	+	orf19.218
Ca21chr2_C_albicans_SC5314	1807085	1807699	MSPC_Peak_117;ID=orf19.218;Name=orf19.218;Peak-1807304-1807645;Summit-1807487-1807501;Dist-0	inf	+	orf19.218
Ca21chr2_C_albicans_SC5314	1851478	1851904	MSPC_Peak_113;ID=orf19.199;Name=orf19.199;Peak-1849458-1850993;Summit-1851681-1851682;Dist--689	44	-	orf19.199
Ca21chr2_C_albicans_SC5314	1880865	1882120	MSPC_Peak_109;ID=orf19.4077;Name=orf19.4077;Peak-1880524-1882158;Summit-1881068-1881069;Dist-0	99	+	orf19.4077
Ca21chr2_C_albicans_SC5314	1888038	1888447	MSPC_Peak_104;ID=tP(UGG)2;Name=tP(UGG)2;Peak-1888132-1888223;Summit-1888193-1888206;Dist-0	inf	+	tP(UGG)2
Ca21chr2_C_albicans_SC5314	1890381	1890734	MSPC_Peak_101;ID=orf19.4082;Name=orf19.4082;Peak-1889969-1890607;Summit-1890419-1890420;Dist-0	22	+	orf19.4082
Ca21chr2_C_albicans_SC5314	1935604	1936521	MSPC_Peak_98;ID=orf19.1604;Name=orf19.1604;Peak-1930310-1933514;Summit-1935819-1935820;Dist--2306	inf	-	orf19.1604
Ca21chr2_C_albicans_SC5314	1935604	1936521	MSPC_Peak_98;ID=orf19.1604;Name=orf19.1604;Peak-1930310-1933514;Summit-1936311-1936314;Dist--2798	inf	-	orf19.1604
Ca21chr2_C_albicans_SC5314	1953647	1954183	MSPC_Peak_94;ID=orf19.1402;Name=orf19.1402;Peak-1946280-1947860;Summit-1953895-1953896;Dist--6036	55	-	orf19.1402
Ca21chr2_C_albicans_SC5314	1978577	1978843	MSPC_Peak_91;ID=orf19.1387;Name=orf19.1387;Peak-1978474-1979358;Summit-1978769-1978770;Dist-0	23	-	orf19.1387
Ca21chr2_C_albicans_SC5314	2030760	2031120	MSPC_Peak_88;ID=orf19.1358;Name=orf19.1358;Peak-2031301-2032272;Summit-2031064-2031065;Dist--237	54	+	orf19.1358
Ca21chr2_C_albicans_SC5314	2034961	2035755	MSPC_Peak_84;ID=orf19.1357;Name=orf19.1357;Peak-2034842-2036386;Summit-2035075-2035076;Dist-0	60.835	+	orf19.1357
Ca21chr2_C_albicans_SC5314	2034961	2035755	MSPC_Peak_84;ID=orf19.1357;Name=orf19.1357;Peak-2034842-2036386;Summit-2035575-2035576;Dist-0	60.835	+	orf19.1357
Ca21chr2_C_albicans_SC5314	2054927	2055462	MSPC_Peak_65;ID=orf19.1779;Name=orf19.1779;Peak-2053567-2054703;Summit-2055087-2055088;Dist--385	290.633	-	orf19.1779
Ca21chr2_C_albicans_SC5314	2054927	2055462	MSPC_Peak_65;ID=orf19.1779;Name=orf19.1779;Peak-2053567-2054703;Summit-2055124-2055125;Dist--422	290.633	-	orf19.1779
Ca21chr2_C_albicans_SC5314	2054927	2055462	MSPC_Peak_65;ID=orf19.1779;Name=orf19.1779;Peak-2053567-2054703;Summit-2055289-2055290;Dist--587	290.633	-	orf19.1779
Ca21chr2_C_albicans_SC5314	2073860	2074201	MSPC_Peak_63;ID=orf19.1770;Name=orf19.1770;Peak-2074774-2075106;Summit-2073985-2073993;Dist--782	inf	+	orf19.1770
Ca21chr2_C_albicans_SC5314	2074751	2075609	MSPC_Peak_60;ID=orf19.1770;Name=orf19.1770;Peak-2074774-2075106;Summit-2074982-2074983;Dist-0	170.399	+	orf19.1770
Ca21chr2_C_albicans_SC5314	2074751	2075609	MSPC_Peak_60;ID=orf19.1770;Name=orf19.1770;Peak-2074774-2075106;Summit-2075005-2075006;Dist-0	170.399	+	orf19.1770
Ca21chr2_C_albicans_SC5314	2097300	2097658	MSPC_Peak_56;ID=orf19.1760;Name=orf19.1760;Peak-2096718-2097593;Summit-2097384-2097385;Dist-0	67	-	orf19.1760
Ca21chr2_C_albicans_SC5314	2098731	2099786	MSPC_Peak_54;ID=orf19.1760;Name=orf19.1760;Peak-2096718-2097593;Summit-2098952-2098960;Dist--1360	inf	-	orf19.1760
Ca21chr2_C_albicans_SC5314	2098731	2099786	MSPC_Peak_54;ID=orf19.1759;Name=orf19.1759;Peak-2099138-2100586;Summit-2099554-2099555;Dist-0	inf	-	orf19.1759
Ca21chr2_C_albicans_SC5314	2116856	2117175	MSPC_Peak_49;ID=orf19.1751;Name=orf19.1751;Peak-2117063-2119291;Summit-2117115-2117116;Dist-0	91	-	orf19.1751
Ca21chr2_C_albicans_SC5314	2137248	2138264	MSPC_Peak_45;ID=orf19.1743;Name=orf19.1743;Peak-2132241-2134268;Summit-2137298-2137299;Dist--3031	50.91	-	orf19.1743
Ca21chr2_C_albicans_SC5314	2137248	2138264	MSPC_Peak_45;ID=orf19.1742;Name=orf19.1742;Peak-2137432-2138454;Summit-2137795-2137796;Dist-0	50.91	-	orf19.1742
Ca21chr2_C_albicans_SC5314	2147309	2147682	MSPC_Peak_41;ID=orf19.3490;Name=orf19.3490;Peak-2151608-2153146;Summit-2147529-2147533;Dist--4076	inf	+	orf19.3490
Ca21chr2_C_albicans_SC5314	2148109	2149436	MSPC_Peak_39;ID=orf19.3490;Name=orf19.3490;Peak-2151608-2153146;Summit-2148885-2148886;Dist--2723	inf	+	orf19.3490
Ca21chr2_C_albicans_SC5314	2148109	2149436	MSPC_Peak_39;ID=orf19.3490;Name=orf19.3490;Peak-2151608-2153146;Summit-2148908-2148909;Dist--2700	inf	+	orf19.3490
Ca21chr2_C_albicans_SC5314	2167681	2167965	MSPC_Peak_38;ID=tV(UAC)1;Name=tV(UAC)1;Peak-2167779-2167874;Summit-2167806-2167815;Dist-0	inf	-	tV(UAC)1
Ca21chr2_C_albicans_SC5314	2168370	2168739	MSPC_Peak_37;ID=tF(GAA)4;Name=tF(GAA)4;Peak-2168512-2168599;Summit-2168530-2168552;Dist-0	inf	+	tF(GAA)4
Ca21chr2_C_albicans_SC5314	2169493	2169887	MSPC_Peak_36;ID=orf19.5325;Name=orf19.5325;Peak-2169760-2171046;Summit-2169804-2169805;Dist-0	36	-	orf19.5325
Ca21chr2_C_albicans_SC5314	2179571	2179930	MSPC_Peak_35;ID=orf19.5334;Name=orf19.5334;Peak-2179811-2180422;Summit-2179848-2179849;Dist-0	43	-	orf19.5334
Ca21chr2_C_albicans_SC5314	2185113	2185359	MSPC_Peak_33;ID=orf19.5337;Name=orf19.5337;Peak-2185048-2185575;Summit-2185174-2185175;Dist-0	20	+	orf19.5337
Ca21chr2_C_albicans_SC5314	2190342	2190981	MSPC_Peak_30;ID=orf19.5341;Name=orf19.5341;Peak-2189961-2190749;Summit-2190618-2190619;Dist-0	87	+	orf19.5341
Ca21chr2_C_albicans_SC5314	2196819	2197108	MSPC_Peak_28;ID=orf19.5345;Name=orf19.5345;Peak-2196208-2197227;Summit-2197043-2197044;Dist-0	28	+	orf19.5345
Ca21chr2_C_albicans_SC5314	2199443	2199765	MSPC_Peak_24;ID=orf19.5348;Name=orf19.5348;Peak-2198883-2201968;Summit-2199661-2199662;Dist-0	35	+	orf19.5348
Ca21chr2_C_albicans_SC5314	2201672	2202146	MSPC_Peak_20;ID=orf19.5350;Name=orf19.5350;Peak-2201965-2202837;Summit-2201998-2201999;Dist-0	29	-	orf19.5350
Ca21chr2_C_albicans_SC5314	2203239	2203541	MSPC_Peak_16;ID=orf19.5351;Name=orf19.5351;Peak-2203030-2203494;Summit-2203476-2203477;Dist-0	41	+	orf19.5351
Ca21chr2_C_albicans_SC5314	2224119	2224381	MSPC_Peak_12;ID=orf19.5368;Name=orf19.5368;Peak-2224060-2225673;Summit-2224294-2224295;Dist-0	24	-	orf19.5368
Ca21chr2_C_albicans_SC5314	2230024	2230918	MSPC_Peak_8;ID=orf19.5369;Name=orf19.5369;Peak-2225932-2227017;Summit-2230797-2230798;Dist--3781	147.46	-	orf19.5369
Ca21chr2_C_albicans_SC5314	2230024	2230918	MSPC_Peak_8;ID=orf19.5369;Name=orf19.5369;Peak-2225932-2227017;Summit-2230885-2230886;Dist--3869	147.46	-	orf19.5369
Ca21chr2_C_albicans_SC5314	2231180	2231619	MSPC_Peak_4;ID=orf19.5369;Name=orf19.5369;Peak-2225932-2227017;Summit-2231383-2231384;Dist--4367	87	-	orf19.5369
Ca21chr3_C_albicans_SC5314	224	508	MSPC_Peak_1215;ID=orf19.5475;Name=orf19.5475;Peak-3999-4823;Summit-414-415;Dist--3585	23	+	orf19.5475
Ca21chr3_C_albicans_SC5314	1830	2174	MSPC_Peak_1213;ID=orf19.5475;Name=orf19.5475;Peak-3999-4823;Summit-1976-1977;Dist--2023	57	+	orf19.5475
Ca21chr3_C_albicans_SC5314	4624	5002	MSPC_Peak_1211;ID=orf19.5475;Name=orf19.5475;Peak-3999-4823;Summit-4811-4812;Dist-0	132	+	orf19.5475
Ca21chr3_C_albicans_SC5314	6356	6670	MSPC_Peak_1209;ID=orf19.5472;Name=orf19.5472;Peak-5971-7002;Summit-6444-6445;Dist-0	66	+	orf19.5472
Ca21chr3_C_albicans_SC5314	6953	7227	MSPC_Peak_1207;ID=orf19.5469;Name=orf19.5469;Peak-4903-8097;Summit-7184-7185;Dist-0	38	-	orf19.5469
Ca21chr3_C_albicans_SC5314	8260	8881	MSPC_Peak_1205;ID=orf19.5469;Name=orf19.5469;Peak-4903-8097;Summit-8389-8390;Dist--293	100	-	orf19.5469
Ca21chr3_C_albicans_SC5314	13748	13988	MSPC_Peak_1204;ID=orf19.5467;Name=orf19.5467;Peak-13756-14265;Summit-13833-13834;Dist-0	39	+	orf19.5467
Ca21chr3_C_albicans_SC5314	14953	15536	MSPC_Peak_1203;ID=orf19.5466;Name=orf19.5466;Peak-15901-16308;Summit-15236-15237;Dist--665	202.939	+	orf19.5466
Ca21chr3_C_albicans_SC5314	14953	15536	MSPC_Peak_1203;ID=orf19.5466;Name=orf19.5466;Peak-15901-16308;Summit-15300-15301;Dist--601	202.939	+	orf19.5466
Ca21chr3_C_albicans_SC5314	14953	15536	MSPC_Peak_1203;ID=orf19.5466;Name=orf19.5466;Peak-15901-16308;Summit-15349-15350;Dist--552	202.939	+	orf19.5466
Ca21chr3_C_albicans_SC5314	15927	16486	MSPC_Peak_1202;ID=orf19.5466;Name=orf19.5466;Peak-15901-16308;Summit-16250-16251;Dist-0	40	+	orf19.5466
Ca21chr3_C_albicans_SC5314	22546	22813	MSPC_Peak_1200;ID=orf19.5457;Name=orf19.5457;Peak-21254-22687;Summit-22656-22657;Dist-0	31	-	orf19.5457
Ca21chr3_C_albicans_SC5314	30035	30602	MSPC_Peak_1198;ID=orf19.5447;Name=orf19.5447;Peak-28278-30170;Summit-30143-30144;Dist-0	102.615	+	orf19.5447
Ca21chr3_C_albicans_SC5314	30035	30602	MSPC_Peak_1198;ID=orf19.5445;Name=orf19.5445;Peak-30220-31575;Summit-30363-30364;Dist-0	102.615	-	orf19.5445
Ca21chr3_C_albicans_SC5314	32241	32465	MSPC_Peak_1196;ID=orf19.5444;Name=orf19.5444;Peak-31718-32992;Summit-32251-32252;Dist-0	21	-	orf19.5444
Ca21chr3_C_albicans_SC5314	32681	33067	MSPC_Peak_1194;ID=orf19.5444;Name=orf19.5444;Peak-31718-32992;Summit-32896-32897;Dist-0	34	-	orf19.5444
Ca21chr3_C_albicans_SC5314	44386	44685	MSPC_Peak_1191;ID=orf19.5437;Name=orf19.5437;Peak-45115-45879;Summit-44508-44509;Dist--607	191	+	orf19.5437
Ca21chr3_C_albicans_SC5314	45106	46058	MSPC_Peak_1185;ID=orf19.5437;Name=orf19.5437;Peak-45115-45879;Summit-45541-45542;Dist-0	47	+	orf19.5437
Ca21chr3_C_albicans_SC5314	50145	50591	MSPC_Peak_1182;ID=orf19.5431;Name=orf19.5431;Peak-51706-52413;Summit-50336-50348;Dist--1359	inf	+	orf19.5431
Ca21chr3_C_albicans_SC5314	52132	52853	MSPC_Peak_1179;ID=orf19.5431;Name=orf19.5431;Peak-51706-52413;Summit-52266-52267;Dist-0	16	+	orf19.5431
Ca21chr3_C_albicans_SC5314	65884	66143	MSPC_Peak_1176;ID=orf19.5418;Name=orf19.5418;Peak-66463-67896;Summit-66075-66076;Dist--388	42	+	orf19.5418
Ca21chr3_C_albicans_SC5314	144417	145158	MSPC_Peak_1173;ID=orf19.5379;Name=orf19.5379;Peak-143572-144981;Summit-144703-144704;Dist-0	48	+	orf19.5379
Ca21chr3_C_albicans_SC5314	175323	177122	MSPC_Peak_1170;ID=orf19.6165;Name=orf19.6165;Peak-175326-178316;Summit-175605-175606;Dist-0	119.386	+	orf19.6165
Ca21chr3_C_albicans_SC5314	175323	177122	MSPC_Peak_1170;ID=orf19.6165;Name=orf19.6165;Peak-175326-178316;Summit-176057-176058;Dist-0	119.386	+	orf19.6165
Ca21chr3_C_albicans_SC5314	175323	177122	MSPC_Peak_1170;ID=orf19.6165;Name=orf19.6165;Peak-175326-178316;Summit-176178-176179;Dist-0	119.386	+	orf19.6165
Ca21chr3_C_albicans_SC5314	175323	177122	MSPC_Peak_1170;ID=orf19.6165;Name=orf19.6165;Peak-175326-178316;Summit-176759-176760;Dist-0	119.386	+	orf19.6165
Ca21chr3_C_albicans_SC5314	186750	187002	MSPC_Peak_1168;ID=orf19.6169;Name=orf19.6169;Peak-187466-188263;Summit-186842-186862;Dist--605	223.283	+	orf19.6169
Ca21chr3_C_albicans_SC5314	187502	188381	MSPC_Peak_1166;ID=orf19.6169;Name=orf19.6169;Peak-187466-188263;Summit-188257-188258;Dist-0	41	+	orf19.6169
Ca21chr3_C_albicans_SC5314	189411	190513	MSPC_Peak_1164;ID=orf19.2496;Name=orf19.2496;Peak-189366-190163;Summit-190141-190142;Dist-0	165	+	orf19.2496
Ca21chr3_C_albicans_SC5314	195943	196292	MSPC_Peak_1161;ID=tG(UCC)1;Name=tG(UCC)1;Peak-196083-196153;Summit-196081-196088;Dist-0	inf	+	tG(UCC)1
Ca21chr3_C_albicans_SC5314	210795	211566	MSPC_Peak_1159;ID=orf19.2506;Name=orf19.2506;Peak-209733-211526;Summit-210818-210819;Dist-0	21	+	orf19.2506
Ca21chr3_C_albicans_SC5314	237959	238251	MSPC_Peak_1157;ID=orf19.3153;Name=orf19.3153;Peak-236576-238732;Summit-238033-238034;Dist-0	52	+	orf19.3153
Ca21chr3_C_albicans_SC5314	246685	247990	MSPC_Peak_1155;ID=orf19.3156;Name=orf19.3156;Peak-240982-244245;Summit-246820-246837;Dist--2576	inf	-	orf19.3156
Ca21chr3_C_albicans_SC5314	246685	247990	MSPC_Peak_1155;ID=orf19.3159;Name=orf19.3159;Peak-250059-257564;Summit-247683-247684;Dist--2376	inf	+	orf19.3159
Ca21chr3_C_albicans_SC5314	246685	247990	MSPC_Peak_1155;ID=orf19.3159;Name=orf19.3159;Peak-250059-257564;Summit-247791-247792;Dist--2268	inf	+	orf19.3159
Ca21chr3_C_albicans_SC5314	261769	262167	MSPC_Peak_1153;ID=tR(CCU)1;Name=tR(CCU)1;Peak-261905-261993;Summit-261933-261951;Dist-0	inf	-	tR(CCU)1
Ca21chr3_C_albicans_SC5314	265998	266891	MSPC_Peak_1142;ID=orf19.1727;Name=orf19.1727;Peak-264975-268610;Summit-266374-266375;Dist-0	46	+	orf19.1727
Ca21chr3_C_albicans_SC5314	291662	293263	MSPC_Peak_1139;ID=orf19.1715;Name=orf19.1715;Peak-291579-293369;Summit-291839-291840;Dist-0	110.452	-	orf19.1715
Ca21chr3_C_albicans_SC5314	291662	293263	MSPC_Peak_1139;ID=orf19.1715;Name=orf19.1715;Peak-291579-293369;Summit-292462-292463;Dist-0	110.452	-	orf19.1715
Ca21chr3_C_albicans_SC5314	291662	293263	MSPC_Peak_1139;ID=orf19.1715;Name=orf19.1715;Peak-291579-293369;Summit-293004-293005;Dist-0	110.452	-	orf19.1715
Ca21chr3_C_albicans_SC5314	314269	314735	MSPC_Peak_1136;ID=orf19.1702;Name=orf19.1702;Peak-315172-315812;Summit-314542-314577;Dist--596	inf	+	orf19.1702
Ca21chr3_C_albicans_SC5314	317209	318269	MSPC_Peak_1133;ID=orf19.1700;Name=orf19.1700;Peak-317435-317995;Summit-317543-317562;Dist-0	136.275	+	orf19.1700
Ca21chr3_C_albicans_SC5314	317209	318269	MSPC_Peak_1133;ID=orf19.1701;Name=orf19.1701;Peak-316046-316768;Summit-318001-318002;Dist--1234	136.275	-	orf19.1701
Ca21chr3_C_albicans_SC5314	336208	336631	MSPC_Peak_1130;ID=orf19.1691;Name=orf19.1691;Peak-335872-336459;Summit-336339-336340;Dist-0	33	+	orf19.1691
Ca21chr3_C_albicans_SC5314	338247	339511	MSPC_Peak_1127;ID=orf19.1690;Name=orf19.1690;Peak-336918-338324;Summit-338907-338912;Dist--584	inf	-	orf19.1690
Ca21chr3_C_albicans_SC5314	339791	340351	MSPC_Peak_1125;ID=orf19.1690;Name=orf19.1690;Peak-336918-338324;Summit-340032-340049;Dist--1709	inf	-	orf19.1690
Ca21chr3_C_albicans_SC5314	339791	340351	MSPC_Peak_1125;ID=orf19.1690;Name=orf19.1690;Peak-336918-338324;Summit-340074-340075;Dist--1751	inf	-	orf19.1690
Ca21chr3_C_albicans_SC5314	361665	362357	MSPC_Peak_1123;ID=orf19.1679;Name=orf19.1679;Peak-358213-359142;Summit-361937-361946;Dist--2796	189.995	-	orf19.1679
Ca21chr3_C_albicans_SC5314	361665	362357	MSPC_Peak_1123;ID=orf19.1679;Name=orf19.1679;Peak-358213-359142;Summit-362242-362243;Dist--3101	189.995	-	orf19.1679
Ca21chr3_C_albicans_SC5314	372188	372694	MSPC_Peak_1121;ID=orf19.1672;Name=orf19.1672;Peak-372245-375910;Summit-372582-372583;Dist-0	57	-	orf19.1672
Ca21chr3_C_albicans_SC5314	376628	377008	MSPC_Peak_1119;ID=orf19.1671;Name=orf19.1671;Peak-376404-377816;Summit-376642-376643;Dist-0	16	-	orf19.1671
Ca21chr3_C_albicans_SC5314	399072	400347	MSPC_Peak_1117;ID=orf19.1665;Name=orf19.1665;Peak-399126-400421;Summit-399959-399960;Dist-0	54	-	orf19.1665
Ca21chr3_C_albicans_SC5314	407950	408272	MSPC_Peak_1115;ID=tV(AAC)2;Name=tV(AAC)2;Peak-408049-408122;Summit-408072-408089;Dist-0	inf	-	tV(AAC)2
Ca21chr3_C_albicans_SC5314	412063	412396	MSPC_Peak_1114;ID=tK(UUU)1;Name=tK(UUU)1;Peak-412144-412218;Summit-412194-412207;Dist-0	inf	-	tK(UUU)1
Ca21chr3_C_albicans_SC5314	416334	416606	MSPC_Peak_1112;ID=orf19.1658;Name=orf19.1658;Peak-414753-416640;Summit-416484-416505;Dist-0	81.711	-	orf19.1658
Ca21chr3_C_albicans_SC5314	417325	418008	MSPC_Peak_1110;ID=orf19.1658;Name=orf19.1658;Peak-414753-416640;Summit-417559-417580;Dist--920	inf	-	orf19.1658
Ca21chr3_C_albicans_SC5314	417325	418008	MSPC_Peak_1110;ID=orf19.1658;Name=orf19.1658;Peak-414753-416640;Summit-417615-417616;Dist--976	inf	-	orf19.1658
Ca21chr3_C_albicans_SC5314	423613	423977	MSPC_Peak_1101;ID=tY(GUA)2;Name=tY(GUA)2;Peak-423773-423887;Summit-423799-423814;Dist-0	inf	-	tY(GUA)2
Ca21chr3_C_albicans_SC5314	427639	428006	MSPC_Peak_1098;ID=orf19.1654;Name=orf19.1654;Peak-427630-428217;Summit-427698-427699;Dist-0	128.326	-	orf19.1654
Ca21chr3_C_albicans_SC5314	427639	428006	MSPC_Peak_1098;ID=orf19.1654;Name=orf19.1654;Peak-427630-428217;Summit-427762-427763;Dist-0	128.326	-	orf19.1654
Ca21chr3_C_albicans_SC5314	427639	428006	MSPC_Peak_1098;ID=orf19.1654;Name=orf19.1654;Peak-427630-428217;Summit-427877-427878;Dist-0	128.326	-	orf19.1654
Ca21chr3_C_albicans_SC5314	428362	429151	MSPC_Peak_1095;ID=orf19.1653;Name=orf19.1653;Peak-428556-429146;Summit-428683-428686;Dist-0	274.681	-	orf19.1653
Ca21chr3_C_albicans_SC5314	428362	429151	MSPC_Peak_1095;ID=orf19.1653;Name=orf19.1653;Peak-428556-429146;Summit-428803-428804;Dist-0	274.681	-	orf19.1653
Ca21chr3_C_albicans_SC5314	429486	429908	MSPC_Peak_1092;ID=orf19.1652;Name=orf19.1652;Peak-429603-431732;Summit-429698-429699;Dist-0	129	-	orf19.1652
Ca21chr3_C_albicans_SC5314	447529	447815	MSPC_Peak_1089;ID=tE(UUC)2;Name=tE(UUC)2;Peak-447621-447714;Summit-447642-447659;Dist-0	inf	-	tE(UUC)2
Ca21chr3_C_albicans_SC5314	447529	447815	MSPC_Peak_1089;ID=tE(UUC)2;Name=tE(UUC)2;Peak-447621-447714;Summit-447680-447681;Dist-0	inf	-	tE(UUC)2
Ca21chr3_C_albicans_SC5314	457972	459006	MSPC_Peak_1087;ID=orf19.1635;Name=orf19.1635;Peak-457876-458373;Summit-458295-458296;Dist-0	25.199	+	orf19.1635
Ca21chr3_C_albicans_SC5314	457972	459006	MSPC_Peak_1087;ID=orf19.1634;Name=orf19.1634;Peak-459384-460584;Summit-458757-458758;Dist--627	25.199	+	orf19.1634
Ca21chr3_C_albicans_SC5314	464816	466114	MSPC_Peak_1085;ID=orf19.1631;Name=orf19.1631;Peak-465114-466244;Summit-465336-465337;Dist-0	169	-	orf19.1631
Ca21chr3_C_albicans_SC5314	466681	466921	MSPC_Peak_1083;ID=orf19.1631;Name=orf19.1631;Peak-465114-466244;Summit-466774-466775;Dist--531	54	-	orf19.1631
Ca21chr3_C_albicans_SC5314	487658	487923	MSPC_Peak_1080;ID=orf19.1621;Name=orf19.1621;Peak-484971-486479;Summit-487788-487789;Dist--1310	78	-	orf19.1621
Ca21chr3_C_albicans_SC5314	490771	491050	MSPC_Peak_1077;ID=orf19.1619;Name=orf19.1619;Peak-489183-490943;Summit-490857-490858;Dist-0	64	-	orf19.1619
Ca21chr3_C_albicans_SC5314	493069	494158	MSPC_Peak_1074;ID=orf19.1618;Name=orf19.1618;Peak-493471-495612;Summit-493750-493751;Dist-0	34	-	orf19.1618
Ca21chr3_C_albicans_SC5314	495234	495612	MSPC_Peak_1070;ID=orf19.1618;Name=orf19.1618;Peak-493471-495612;Summit-495236-495250;Dist-0	30.127	-	orf19.1618
Ca21chr3_C_albicans_SC5314	496661	496988	MSPC_Peak_1068;ID=orf19.1617;Name=orf19.1617;Peak-497489-498661;Summit-496837-496852;Dist--638	272.198	+	orf19.1617
Ca21chr3_C_albicans_SC5314	508393	508983	MSPC_Peak_1066;ID=orf19.1613;Name=orf19.1613;Peak-507202-509253;Summit-508502-508503;Dist-0	43	+	orf19.1613
Ca21chr3_C_albicans_SC5314	539018	539473	MSPC_Peak_1055;ID=orf19.236;Name=orf19.236;Peak-538929-539504;Summit-539018-539019;Dist-0	14	-	orf19.236
Ca21chr3_C_albicans_SC5314	550928	551306	MSPC_Peak_1053;ID=tM(CAU)1;Name=tM(CAU)1;Peak-551091-551162;Summit-551104-551124;Dist-0	inf	+	tM(CAU)1
Ca21chr3_C_albicans_SC5314	566018	566510	MSPC_Peak_1050;ID=orf19.251;Name=orf19.251;Peak-565238-565948;Summit-566268-566278;Dist--321	inf	-	orf19.251
Ca21chr3_C_albicans_SC5314	573865	574143	MSPC_Peak_1046;ID=orf19.255;Name=orf19.255;Peak-570261-572777;Summit-573963-573964;Dist--1187	121	-	orf19.255
Ca21chr3_C_albicans_SC5314	588783	589693	MSPC_Peak_1041;ID=orf19.263.1;Name=orf19.263.1;Peak-588472-589302;Summit-589139-589140;Dist-0	150.194	+	orf19.263.1
Ca21chr3_C_albicans_SC5314	588783	589693	MSPC_Peak_1041;ID=orf19.263.1;Name=orf19.263.1;Peak-588472-589302;Summit-589271-589272;Dist-0	150.194	+	orf19.263.1
Ca21chr3_C_albicans_SC5314	588783	589693	MSPC_Peak_1041;ID=orf19.264;Name=orf19.264;Peak-590521-591873;Summit-589319-589320;Dist--1202	150.194	+	orf19.264
Ca21chr3_C_albicans_SC5314	591959	592255	MSPC_Peak_1039;ID=tF(GAA)1;Name=tF(GAA)1;Peak-592017-592104;Summit-592083-592105;Dist-0	inf	-	tF(GAA)1
Ca21chr3_C_albicans_SC5314	601948	602360	MSPC_Peak_1036;ID=orf19.269;Name=orf19.269;Peak-601355-602731;Summit-602174-602175;Dist-0	70	+	orf19.269
Ca21chr3_C_albicans_SC5314	638723	639205	MSPC_Peak_1032;ID=orf19.297;Name=orf19.297;Peak-638901-639473;Summit-639064-639065;Dist-0	40	-	orf19.297
Ca21chr3_C_albicans_SC5314	642008	642947	MSPC_Peak_1029;ID=orf19.300;Name=orf19.300;Peak-641879-643462;Summit-642342-642343;Dist-0	84.696	+	orf19.300
Ca21chr3_C_albicans_SC5314	642008	642947	MSPC_Peak_1029;ID=orf19.300;Name=orf19.300;Peak-641879-643462;Summit-642769-642770;Dist-0	84.696	+	orf19.300
Ca21chr3_C_albicans_SC5314	643268	643714	MSPC_Peak_1025;ID=orf19.299;Name=orf19.299;Peak-639710-641122;Summit-643583-643584;Dist--2462	120.546	-	orf19.299
Ca21chr3_C_albicans_SC5314	643268	643714	MSPC_Peak_1025;ID=orf19.299;Name=orf19.299;Peak-639710-641122;Summit-643621-643622;Dist--2500	120.546	-	orf19.299
Ca21chr3_C_albicans_SC5314	652377	652700	MSPC_Peak_1021;ID=orf19.304;Name=orf19.304;Peak-652873-654390;Summit-652539-652542;Dist--332	inf	+	orf19.304
Ca21chr3_C_albicans_SC5314	681188	681469	MSPC_Peak_1017;ID=tK(CUU)1;Name=tK(CUU)1;Peak-681268-681357;Summit-681308-681336;Dist-0	inf	-	tK(CUU)1
Ca21chr3_C_albicans_SC5314	703188	703992	MSPC_Peak_1014;ID=tE(UUC)1;Name=tE(UUC)1;Peak-703182-703275;Summit-703274-703276;Dist-0	122.539	+	tE(UUC)1
Ca21chr3_C_albicans_SC5314	708475	708874	MSPC_Peak_1010;ID=orf19.334;Name=orf19.334;Peak-708583-709155;Summit-708771-708772;Dist-0	36	-	orf19.334
Ca21chr3_C_albicans_SC5314	722768	723368	MSPC_Peak_971;ID=orf19.339;Name=orf19.339;Peak-722952-724676;Summit-723148-723149;Dist-0	118	-	orf19.339
Ca21chr3_C_albicans_SC5314	723874	724697	MSPC_Peak_970;ID=orf19.339;Name=orf19.339;Peak-722952-724676;Summit-723886-723887;Dist-0	23	-	orf19.339
Ca21chr3_C_albicans_SC5314	725010	725842	MSPC_Peak_966;ID=orf19.339;Name=orf19.339;Peak-722952-724676;Summit-725659-725660;Dist--984	159	-	orf19.339
Ca21chr3_C_albicans_SC5314	796696	797136	MSPC_Peak_962;ID=orf19.6937;Name=orf19.6937;Peak-797828-799558;Summit-796850-796851;Dist--978	266.706	+	orf19.6937
Ca21chr3_C_albicans_SC5314	796696	797136	MSPC_Peak_962;ID=orf19.6937;Name=orf19.6937;Peak-797828-799558;Summit-796884-796885;Dist--944	266.706	+	orf19.6937
Ca21chr3_C_albicans_SC5314	796696	797136	MSPC_Peak_962;ID=orf19.6937;Name=orf19.6937;Peak-797828-799558;Summit-796910-796911;Dist--918	266.706	+	orf19.6937
Ca21chr3_C_albicans_SC5314	798001	798892	MSPC_Peak_958;ID=orf19.6937;Name=orf19.6937;Peak-797828-799558;Summit-798558-798559;Dist-0	38.031	+	orf19.6937
Ca21chr3_C_albicans_SC5314	798001	798892	MSPC_Peak_958;ID=orf19.6937;Name=orf19.6937;Peak-797828-799558;Summit-798759-798760;Dist-0	38.031	+	orf19.6937
Ca21chr3_C_albicans_SC5314	818931	819317	MSPC_Peak_953;ID=orf19.6924;Name=orf19.6924;Peak-818897-819295;Summit-819218-819219;Dist-0	21	+	orf19.6924
Ca21chr3_C_albicans_SC5314	835633	836001	MSPC_Peak_949;ID=tE(UUC)6;Name=tE(UUC)6;Peak-835796-835892;Summit-835836-835865;Dist-0	inf	-	tE(UUC)6
Ca21chr3_C_albicans_SC5314	845695	846336	MSPC_Peak_945;ID=orf19.2803;Name=orf19.2803;Peak-846304-847275;Summit-846335-846336;Dist-0	13	-	orf19.2803
Ca21chr3_C_albicans_SC5314	855380	856161	MSPC_Peak_941;ID=orf19.5854;Name=orf19.5854;Peak-856949-857797;Summit-856017-856027;Dist--923	inf	+	orf19.5854
Ca21chr3_C_albicans_SC5314	856988	858212	MSPC_Peak_936;ID=orf19.5854.1;Name=orf19.5854.1;Peak-858792-859271;Summit-857988-857989;Dist--804	138	+	orf19.5854.1
Ca21chr3_C_albicans_SC5314	865985	866395	MSPC_Peak_932;ID=snR17A;Name=snR17A;Peak-865974-866286;Summit-866260-866261;Dist-0	66	+	snR17A
Ca21chr3_C_albicans_SC5314	880358	880931	MSPC_Peak_927;ID=orf19.5867;Name=orf19.5867;Peak-883131-884207;Summit-880643-880655;Dist--2477	186.013	+	orf19.5867
Ca21chr3_C_albicans_SC5314	921936	922281	MSPC_Peak_921;ID=orf19.5892;Name=orf19.5892;Peak-919708-922392;Summit-922233-922234;Dist-0	15	+	orf19.5892
Ca21chr3_C_albicans_SC5314	939617	940564	MSPC_Peak_915;ID=orf19.5903;Name=orf19.5903;Peak-939256-940908;Summit-940507-940508;Dist-0	43	+	orf19.5903
Ca21chr3_C_albicans_SC5314	941770	942387	MSPC_Peak_903;ID=orf19.5904;Name=orf19.5904;Peak-941386-942394;Summit-941775-941776;Dist-0	15	-	orf19.5904
Ca21chr3_C_albicans_SC5314	943324	944011	MSPC_Peak_902;ID=orf19.5904;Name=orf19.5904;Peak-941386-942394;Summit-943435-943436;Dist--1042	79.722	-	orf19.5904
Ca21chr3_C_albicans_SC5314	943324	944011	MSPC_Peak_902;ID=orf19.5906;Name=orf19.5906;Peak-943524-945230;Summit-943605-943606;Dist-0	79.722	-	orf19.5906
Ca21chr3_C_albicans_SC5314	946366	947540	MSPC_Peak_901;ID=orf19.5906;Name=orf19.5906;Peak-943524-945230;Summit-947231-947232;Dist--2002	inf	-	orf19.5906
Ca21chr3_C_albicans_SC5314	946366	947540	MSPC_Peak_901;ID=orf19.5906;Name=orf19.5906;Peak-943524-945230;Summit-947255-947262;Dist--2026	inf	-	orf19.5906
Ca21chr3_C_albicans_SC5314	948779	949159	MSPC_Peak_900;ID=orf19.5906;Name=orf19.5906;Peak-943524-945230;Summit-949061-949062;Dist--3832	27	-	orf19.5906
Ca21chr3_C_albicans_SC5314	951742	952336	MSPC_Peak_898;ID=orf19.5908;Name=orf19.5908;Peak-949870-952101;Summit-951760-951761;Dist-0	19	-	orf19.5908
Ca21chr3_C_albicans_SC5314	952634	954028	MSPC_Peak_897;ID=orf19.5908;Name=orf19.5908;Peak-949870-952101;Summit-953663-953673;Dist--1563	inf	-	orf19.5908
Ca21chr3_C_albicans_SC5314	954795	955080	MSPC_Peak_896;ID=orf19.5908;Name=orf19.5908;Peak-949870-952101;Summit-954948-954949;Dist--2848	188	-	orf19.5908
Ca21chr3_C_albicans_SC5314	955654	957375	MSPC_Peak_895;ID=orf19.5908;Name=orf19.5908;Peak-949870-952101;Summit-957053-957054;Dist--4953	inf	-	orf19.5908
Ca21chr3_C_albicans_SC5314	955654	957375	MSPC_Peak_895;ID=orf19.5908;Name=orf19.5908;Peak-949870-952101;Summit-957100-957106;Dist--5000	inf	-	orf19.5908
Ca21chr3_C_albicans_SC5314	957822	958149	MSPC_Peak_894;ID=orf19.5912;Name=orf19.5912;Peak-962572-965772;Summit-957931-957932;Dist--4641	48	+	orf19.5912
Ca21chr3_C_albicans_SC5314	973930	975295	MSPC_Peak_893;ID=orf19.5917.3;Name=orf19.5917.3;Peak-973882-975468;Summit-975294-975295;Dist-0	13	+	orf19.5917.3
Ca21chr3_C_albicans_SC5314	983819	984140	MSPC_Peak_890;ID=orf19.5924;Name=orf19.5924;Peak-985124-988516;Summit-983974-983975;Dist--1150	225	+	orf19.5924
Ca21chr3_C_albicans_SC5314	991522	991945	MSPC_Peak_887;ID=orf19.5926;Name=orf19.5926;Peak-990406-991359;Summit-991851-991852;Dist--493	47	-	orf19.5926
Ca21chr3_C_albicans_SC5314	992314	992620	MSPC_Peak_884;ID=orf19.5927;Name=orf19.5927;Peak-991859-992662;Summit-992315-992316;Dist-0	14	-	orf19.5927
Ca21chr3_C_albicans_SC5314	1039004	1039248	MSPC_Peak_882;ID=tK(CUU)2;Name=tK(CUU)2;Peak-1039068-1039152;Summit-1039124-1039132;Dist-0	inf	-	tK(CUU)2
Ca21chr3_C_albicans_SC5314	1046436	1046740	MSPC_Peak_879;ID=orf19.5956;Name=orf19.5956;Peak-1045672-1046529;Summit-1046463-1046464;Dist-0	41	+	orf19.5956
Ca21chr3_C_albicans_SC5314	1055863	1057031	MSPC_Peak_864;ID=orf19.5960;Name=orf19.5960;Peak-1056760-1057272;Summit-1056885-1056886;Dist-0	42	-	orf19.5960
Ca21chr3_C_albicans_SC5314	1058011	1058463	MSPC_Peak_859;ID=orf19.5960;Name=orf19.5960;Peak-1056760-1057272;Summit-1058174-1058190;Dist--903	inf	-	orf19.5960
Ca21chr3_C_albicans_SC5314	1058011	1058463	MSPC_Peak_859;ID=orf19.5960;Name=orf19.5960;Peak-1056760-1057272;Summit-1058215-1058216;Dist--944	inf	-	orf19.5960
Ca21chr3_C_albicans_SC5314	1058760	1059199	MSPC_Peak_853;ID=orf19.5960;Name=orf19.5960;Peak-1056760-1057272;Summit-1059006-1059027;Dist--1735	135.497	-	orf19.5960
Ca21chr3_C_albicans_SC5314	1066153	1067141	MSPC_Peak_848;ID=orf19.5964;Name=orf19.5964;Peak-1066235-1066780;Summit-1066684-1066685;Dist-0	141	+	orf19.5964
Ca21chr3_C_albicans_SC5314	1067919	1069029	MSPC_Peak_842;ID=orf19.5964.2;Name=orf19.5964.2;Peak-1067946-1068748;Summit-1068690-1068691;Dist-0	137	+	orf19.5964.2
Ca21chr3_C_albicans_SC5314	1074115	1074531	MSPC_Peak_836;ID=orf19.5967;Name=orf19.5967;Peak-1073190-1074422;Summit-1074280-1074281;Dist-0	42	+	orf19.5967
Ca21chr3_C_albicans_SC5314	1075460	1075955	MSPC_Peak_832;ID=orf19.5968;Name=orf19.5968;Peak-1075120-1075731;Summit-1075703-1075704;Dist-0	40	+	orf19.5968
Ca21chr3_C_albicans_SC5314	1096491	1097703	MSPC_Peak_828;ID=orf19.5982;Name=orf19.5982;Peak-1096663-1097682;Summit-1096723-1096724;Dist-0	95.66	-	orf19.5982
Ca21chr3_C_albicans_SC5314	1096491	1097703	MSPC_Peak_828;ID=orf19.5982;Name=orf19.5982;Peak-1096663-1097682;Summit-1096829-1096830;Dist-0	95.66	-	orf19.5982
Ca21chr3_C_albicans_SC5314	1096491	1097703	MSPC_Peak_828;ID=orf19.5982;Name=orf19.5982;Peak-1096663-1097682;Summit-1097046-1097047;Dist-0	95.66	-	orf19.5982
Ca21chr3_C_albicans_SC5314	1096491	1097703	MSPC_Peak_828;ID=orf19.5982;Name=orf19.5982;Peak-1096663-1097682;Summit-1097322-1097323;Dist-0	95.66	-	orf19.5982
Ca21chr3_C_albicans_SC5314	1109003	1109974	MSPC_Peak_823;ID=orf19.5991;Name=orf19.5991;Peak-1105065-1107791;Summit-1109707-1109717;Dist--1917	inf	-	orf19.5991
Ca21chr3_C_albicans_SC5314	1109003	1109974	MSPC_Peak_823;ID=orf19.5991;Name=orf19.5991;Peak-1105065-1107791;Summit-1109746-1109747;Dist--1956	inf	-	orf19.5991
Ca21chr3_C_albicans_SC5314	1112765	1113422	MSPC_Peak_819;ID=orf19.5991;Name=orf19.5991;Peak-1105065-1107791;Summit-1113078-1113085;Dist--5288	inf	-	orf19.5991
Ca21chr3_C_albicans_SC5314	1112765	1113422	MSPC_Peak_819;ID=orf19.5991;Name=orf19.5991;Peak-1105065-1107791;Summit-1113108-1113109;Dist--5318	inf	-	orf19.5991
Ca21chr3_C_albicans_SC5314	1116001	1118260	MSPC_Peak_816;ID=orf19.5992;Name=orf19.5992;Peak-1118833-1120173;Summit-1116491-1116492;Dist--2342	inf	+	orf19.5992
Ca21chr3_C_albicans_SC5314	1116001	1118260	MSPC_Peak_816;ID=orf19.5992;Name=orf19.5992;Peak-1118833-1120173;Summit-1116537-1116538;Dist--2296	inf	+	orf19.5992
Ca21chr3_C_albicans_SC5314	1116001	1118260	MSPC_Peak_816;ID=orf19.5992;Name=orf19.5992;Peak-1118833-1120173;Summit-1117943-1117944;Dist--890	inf	+	orf19.5992
Ca21chr3_C_albicans_SC5314	1116001	1118260	MSPC_Peak_816;ID=orf19.5992;Name=orf19.5992;Peak-1118833-1120173;Summit-1117968-1117969;Dist--865	inf	+	orf19.5992
Ca21chr3_C_albicans_SC5314	1116001	1118260	MSPC_Peak_816;ID=orf19.5992;Name=orf19.5992;Peak-1118833-1120173;Summit-1117992-1117993;Dist--841	inf	+	orf19.5992
Ca21chr3_C_albicans_SC5314	1121074	1121550	MSPC_Peak_809;ID=orf19.5994;Name=orf19.5994;Peak-1126576-1127130;Summit-1121153-1121154;Dist--5423	35	+	orf19.5994
Ca21chr3_C_albicans_SC5314	1124297	1125467	MSPC_Peak_805;ID=orf19.5994;Name=orf19.5994;Peak-1126576-1127130;Summit-1124682-1124714;Dist--1863	inf	+	orf19.5994
Ca21chr3_C_albicans_SC5314	1130347	1131483	MSPC_Peak_800;ID=orf19.5996.1;Name=orf19.5996.1;Peak-1130360-1131164;Summit-1130643-1130644;Dist-0	70.772	+	orf19.5996.1
Ca21chr3_C_albicans_SC5314	1130347	1131483	MSPC_Peak_800;ID=orf19.5996.1;Name=orf19.5996.1;Peak-1130360-1131164;Summit-1130677-1130678;Dist-0	70.772	+	orf19.5996.1
Ca21chr3_C_albicans_SC5314	1144596	1145495	MSPC_Peak_796;ID=orf19.5999;Name=orf19.5999;Peak-1131394-1143879;Summit-1144756-1144764;Dist--878	inf	-	orf19.5999
Ca21chr3_C_albicans_SC5314	1144596	1145495	MSPC_Peak_796;ID=orf19.5999;Name=orf19.5999;Peak-1131394-1143879;Summit-1144787-1144788;Dist--909	inf	-	orf19.5999
Ca21chr3_C_albicans_SC5314	1153265	1154058	MSPC_Peak_764;ID=orf19.6002;Name=orf19.6002;Peak-1153254-1154042;Summit-1153290-1153291;Dist-0	25	-	orf19.6002
Ca21chr3_C_albicans_SC5314	1157976	1158947	MSPC_Peak_762;ID=orf19.6003;Name=orf19.6003;Peak-1154529-1156316;Summit-1158148-1158151;Dist--1833	inf	-	orf19.6003
Ca21chr3_C_albicans_SC5314	1157976	1158947	MSPC_Peak_762;ID=orf19.6003;Name=orf19.6003;Peak-1154529-1156316;Summit-1158515-1158516;Dist--2200	inf	-	orf19.6003
Ca21chr3_C_albicans_SC5314	1175638	1176104	MSPC_Peak_760;ID=orf19.6968;Name=orf19.6968;Peak-1178346-1181807;Summit-1175846-1175847;Dist--2500	46.944	+	orf19.6968
Ca21chr3_C_albicans_SC5314	1175638	1176104	MSPC_Peak_760;ID=orf19.6968;Name=orf19.6968;Peak-1178346-1181807;Summit-1176023-1176024;Dist--2323	46.944	+	orf19.6968
Ca21chr3_C_albicans_SC5314	1191808	1192397	MSPC_Peak_757;ID=orf19.6973;Name=orf19.6973;Peak-1186970-1190746;Summit-1191962-1191963;Dist--1217	inf	-	orf19.6973
Ca21chr3_C_albicans_SC5314	1191808	1192397	MSPC_Peak_757;ID=orf19.6973;Name=orf19.6973;Peak-1186970-1190746;Summit-1192054-1192055;Dist--1309	inf	-	orf19.6973
Ca21chr3_C_albicans_SC5314	1193931	1194334	MSPC_Peak_754;ID=orf19.6975;Name=orf19.6975;Peak-1193135-1194311;Summit-1193963-1193964;Dist-0	41	-	orf19.6975
Ca21chr3_C_albicans_SC5314	1215823	1216181	MSPC_Peak_751;ID=orf19.6982;Name=orf19.6982;Peak-1209814-1211103;Summit-1215830-1215831;Dist--4728	16	-	orf19.6982
Ca21chr3_C_albicans_SC5314	1216432	1217266	MSPC_Peak_744;ID=orf19.6983;Name=orf19.6983;Peak-1216188-1217360;Summit-1216624-1216625;Dist-0	37.042	-	orf19.6983
Ca21chr3_C_albicans_SC5314	1216432	1217266	MSPC_Peak_744;ID=orf19.6983;Name=orf19.6983;Peak-1216188-1217360;Summit-1216647-1216648;Dist-0	37.042	-	orf19.6983
Ca21chr3_C_albicans_SC5314	1217765	1221225	MSPC_Peak_739;ID=orf19.6983;Name=orf19.6983;Peak-1216188-1217360;Summit-1218047-1218048;Dist--688	inf	-	orf19.6983
Ca21chr3_C_albicans_SC5314	1217765	1221225	MSPC_Peak_739;ID=orf19.6983;Name=orf19.6983;Peak-1216188-1217360;Summit-1220450-1220457;Dist--3091	inf	-	orf19.6983
Ca21chr3_C_albicans_SC5314	1222156	1223603	MSPC_Peak_734;ID=orf19.6984;Name=orf19.6984;Peak-1226768-1229056;Summit-1222866-1222867;Dist--3902	inf	+	orf19.6984
Ca21chr3_C_albicans_SC5314	1222156	1223603	MSPC_Peak_734;ID=orf19.6984;Name=orf19.6984;Peak-1226768-1229056;Summit-1222890-1222893;Dist--3876	inf	+	orf19.6984
Ca21chr3_C_albicans_SC5314	1232492	1232817	MSPC_Peak_732;ID=tV(AAC)5;Name=tV(AAC)5;Peak-1232600-1232673;Summit-1232638-1232644;Dist-0	inf	-	tV(AAC)5
Ca21chr3_C_albicans_SC5314	1232492	1232817	MSPC_Peak_732;ID=tV(AAC)6;Name=tV(AAC)6;Peak-1232689-1232762;Summit-1232693-1232694;Dist-0	inf	-	tV(AAC)6
Ca21chr3_C_albicans_SC5314	1233350	1233824	MSPC_Peak_726;ID=SNRNAU6;Name=SNRNAU6;Peak-1233630-1233727;Summit-1233562-1233577;Dist--54	inf	+	SNRNAU6
Ca21chr3_C_albicans_SC5314	1233350	1233824	MSPC_Peak_726;ID=SNRNAU6;Name=SNRNAU6;Peak-1233630-1233727;Summit-1233605-1233606;Dist--25	inf	+	SNRNAU6
Ca21chr3_C_albicans_SC5314	1253919	1254531	MSPC_Peak_720;ID=orf19.6996;Name=orf19.6996;Peak-1254649-1256706;Summit-1254392-1254399;Dist--251	inf	+	orf19.6996
Ca21chr3_C_albicans_SC5314	1263839	1264157	MSPC_Peak_717;ID=orf19.7001;Name=orf19.7001;Peak-1263828-1265315;Summit-1264156-1264157;Dist-0	17	+	orf19.7001
Ca21chr3_C_albicans_SC5314	1264186	1265006	MSPC_Peak_711;ID=orf19.7001;Name=orf19.7001;Peak-1263828-1265315;Summit-1265002-1265003;Dist-0	13	+	orf19.7001
Ca21chr3_C_albicans_SC5314	1268945	1269334	MSPC_Peak_705;ID=orf19.7347;Name=orf19.7347;Peak-1269896-1270627;Summit-1268986-1268987;Dist--910	98.632	+	orf19.7347
Ca21chr3_C_albicans_SC5314	1268945	1269334	MSPC_Peak_705;ID=orf19.7347;Name=orf19.7347;Peak-1269896-1270627;Summit-1269061-1269062;Dist--835	98.632	+	orf19.7347
Ca21chr3_C_albicans_SC5314	1273632	1274410	MSPC_Peak_684;ID=orf19.7349;Name=orf19.7349;Peak-1275141-1277396;Summit-1274092-1274093;Dist--1049	59	+	orf19.7349
Ca21chr3_C_albicans_SC5314	1275516	1275884	MSPC_Peak_680;ID=orf19.7349;Name=orf19.7349;Peak-1275141-1277396;Summit-1275704-1275705;Dist-0	29	+	orf19.7349
Ca21chr3_C_albicans_SC5314	1276143	1276610	MSPC_Peak_675;ID=orf19.7349;Name=orf19.7349;Peak-1275141-1277396;Summit-1276583-1276584;Dist-0	26	+	orf19.7349
Ca21chr3_C_albicans_SC5314	1277095	1277506	MSPC_Peak_672;ID=orf19.7349;Name=orf19.7349;Peak-1275141-1277396;Summit-1277111-1277112;Dist-0	23	+	orf19.7349
Ca21chr3_C_albicans_SC5314	1319292	1319558	MSPC_Peak_669;ID=orf19.7368;Name=orf19.7368;Peak-1318949-1320481;Summit-1319362-1319363;Dist-0	31	-	orf19.7368
Ca21chr3_C_albicans_SC5314	1332807	1333270	MSPC_Peak_665;ID=orf19.7374;Name=orf19.7374;Peak-1333933-1336983;Summit-1332912-1332933;Dist--1001	221.863	+	orf19.7374
Ca21chr3_C_albicans_SC5314	1332807	1333270	MSPC_Peak_665;ID=orf19.7374;Name=orf19.7374;Peak-1333933-1336983;Summit-1332958-1332959;Dist--975	221.863	+	orf19.7374
Ca21chr3_C_albicans_SC5314	1354278	1354785	MSPC_Peak_663;ID=orf19.7380;Name=orf19.7380;Peak-1349946-1352462;Summit-1354530-1354531;Dist--2069	inf	-	orf19.7380
Ca21chr3_C_albicans_SC5314	1354278	1354785	MSPC_Peak_663;ID=orf19.7380;Name=orf19.7380;Peak-1349946-1352462;Summit-1354553-1354554;Dist--2092	inf	-	orf19.7380
Ca21chr3_C_albicans_SC5314	1354278	1354785	MSPC_Peak_663;ID=orf19.7380;Name=orf19.7380;Peak-1349946-1352462;Summit-1354581-1354582;Dist--2120	inf	-	orf19.7380
Ca21chr3_C_albicans_SC5314	1356483	1361265	MSPC_Peak_660;ID=orf19.7381;Name=orf19.7381;Peak-1362620-1364494;Summit-1358250-1358255;Dist--4366	inf	+	orf19.7381
Ca21chr3_C_albicans_SC5314	1356483	1361265	MSPC_Peak_660;ID=orf19.7381;Name=orf19.7381;Peak-1362620-1364494;Summit-1358326-1358327;Dist--4294	inf	+	orf19.7381
Ca21chr3_C_albicans_SC5314	1362128	1362685	MSPC_Peak_657;ID=orf19.7381;Name=orf19.7381;Peak-1362620-1364494;Summit-1362441-1362442;Dist--179	40	+	orf19.7381
Ca21chr3_C_albicans_SC5314	1364357	1364993	MSPC_Peak_653;ID=orf19.7382;Name=orf19.7382;Peak-1366732-1368199;Summit-1364730-1364731;Dist--2002	244	+	orf19.7382
Ca21chr3_C_albicans_SC5314	1366782	1367023	MSPC_Peak_649;ID=orf19.7382;Name=orf19.7382;Peak-1366732-1368199;Summit-1366903-1366904;Dist-0	103	+	orf19.7382
Ca21chr3_C_albicans_SC5314	1367980	1368353	MSPC_Peak_646;ID=orf19.7382;Name=orf19.7382;Peak-1366732-1368199;Summit-1368084-1368085;Dist-0	88	+	orf19.7382
Ca21chr3_C_albicans_SC5314	1378129	1378563	MSPC_Peak_641;ID=orf19.7388;Name=orf19.7388;Peak-1378422-1380059;Summit-1378557-1378558;Dist-0	25	-	orf19.7388
Ca21chr3_C_albicans_SC5314	1379004	1379768	MSPC_Peak_638;ID=orf19.7388;Name=orf19.7388;Peak-1378422-1380059;Summit-1379167-1379168;Dist-0	36	-	orf19.7388
Ca21chr3_C_albicans_SC5314	1425746	1426296	MSPC_Peak_622;ID=orf19.7406;Name=orf19.7406;Peak-1425969-1428029;Summit-1426185-1426186;Dist-0	40	-	orf19.7406
Ca21chr3_C_albicans_SC5314	1454808	1455363	MSPC_Peak_616;ID=orf19.7421;Name=orf19.7421;Peak-1454866-1455477;Summit-1454935-1454936;Dist-0	135.497	-	orf19.7421
Ca21chr3_C_albicans_SC5314	1454808	1455363	MSPC_Peak_616;ID=orf19.7421;Name=orf19.7421;Peak-1454866-1455477;Summit-1455254-1455255;Dist-0	135.497	-	orf19.7421
Ca21chr3_C_albicans_SC5314	1469473	1469885	MSPC_Peak_613;ID=tH(GUG)3;Name=tH(GUG)3;Peak-1469616-1469713;Summit-1469656-1469665;Dist-0	inf	-	tH(GUG)3
Ca21chr3_C_albicans_SC5314	1470188	1475792	MSPC_Peak_608;ID=tH(GUG)3;Name=tH(GUG)3;Peak-1469616-1469713;Summit-1470966-1470984;Dist--1254	inf	-	tH(GUG)3
Ca21chr3_C_albicans_SC5314	1496558	1496913	MSPC_Peak_604;ID=orf19.7445;Name=orf19.7445;Peak-1496409-1497896;Summit-1496660-1496661;Dist-0	109.587	+	orf19.7445
Ca21chr3_C_albicans_SC5314	1496558	1496913	MSPC_Peak_604;ID=orf19.7445;Name=orf19.7445;Peak-1496409-1497896;Summit-1496818-1496819;Dist-0	109.587	+	orf19.7445
Ca21chr3_C_albicans_SC5314	1527267	1529519	MSPC_Peak_600;ID=orf19.7459;Name=orf19.7459;Peak-1527584-1529425;Summit-1528146-1528147;Dist-0	63	-	orf19.7459
Ca21chr3_C_albicans_SC5314	1560827	1561236	MSPC_Peak_598;ID=tW(CCA)2;Name=tW(CCA)2;Peak-1560956-1561051;Summit-1560977-1561002;Dist-0	inf	-	tW(CCA)2
Ca21chr3_C_albicans_SC5314	1595118	1595393	MSPC_Peak_594;ID=tY(GUA)3;Name=tY(GUA)3;Peak-1595186-1595301;Summit-1595234-1595238;Dist-0	inf	-	tY(GUA)3
Ca21chr3_C_albicans_SC5314	1606385	1606801	MSPC_Peak_590;ID=orf19.6798;Name=orf19.6798;Peak-1608040-1611282;Summit-1606570-1606586;Dist--1455	inf	+	orf19.6798
Ca21chr3_C_albicans_SC5314	1622408	1622944	MSPC_Peak_584;ID=orf19.6793;Name=orf19.6793;Peak-1617667-1618764;Summit-1622800-1622813;Dist--4037	37.042	-	orf19.6793
Ca21chr3_C_albicans_SC5314	1636419	1637206	MSPC_Peak_578;ID=orf19.6785;Name=orf19.6785;Peak-1636669-1637100;Summit-1636707-1636708;Dist-0	182.37	-	orf19.6785
Ca21chr3_C_albicans_SC5314	1636419	1637206	MSPC_Peak_578;ID=orf19.6785;Name=orf19.6785;Peak-1636669-1637100;Summit-1636737-1636738;Dist-0	182.37	-	orf19.6785
Ca21chr3_C_albicans_SC5314	1646314	1647250	MSPC_Peak_574;ID=orf19.6782;Name=orf19.6782;Peak-1643770-1645824;Summit-1646482-1646494;Dist--659	inf	-	orf19.6782
Ca21chr3_C_albicans_SC5314	1648045	1648314	MSPC_Peak_569;ID=orf19.6782;Name=orf19.6782;Peak-1643770-1645824;Summit-1648163-1648164;Dist--2340	88	-	orf19.6782
Ca21chr3_C_albicans_SC5314	1668510	1669377	MSPC_Peak_565;ID=orf19.6771;Name=orf19.6771;Peak-1668693-1669382;Summit-1668984-1668985;Dist-0	inf	-	orf19.6771
Ca21chr3_C_albicans_SC5314	1697117	1697469	MSPC_Peak_560;ID=orf19.6749;Name=orf19.6749;Peak-1697275-1699059;Summit-1697351-1697352;Dist-0	52	-	orf19.6749
Ca21chr3_C_albicans_SC5314	1702027	1703078	MSPC_Peak_528;ID=orf19.6745;Name=orf19.6745;Peak-1702071-1702817;Summit-1702414-1702415;Dist-0	inf	+	orf19.6745
Ca21chr3_C_albicans_SC5314	1702027	1703078	MSPC_Peak_528;ID=orf19.6745;Name=orf19.6745;Peak-1702071-1702817;Summit-1702478-1702479;Dist-0	inf	+	orf19.6745
Ca21chr3_C_albicans_SC5314	1702027	1703078	MSPC_Peak_528;ID=orf19.6745;Name=orf19.6745;Peak-1702071-1702817;Summit-1702699-1702700;Dist-0	inf	+	orf19.6745
Ca21chr3_C_albicans_SC5314	1714804	1715428	MSPC_Peak_526;ID=snR52;Name=snR52;Peak-1714908-1715031;Summit-1715069-1715070;Dist--39	inf	-	snR52
Ca21chr3_C_albicans_SC5314	1714804	1715428	MSPC_Peak_526;ID=snR52;Name=snR52;Peak-1714908-1715031;Summit-1715095-1715096;Dist--65	inf	-	snR52
Ca21chr3_C_albicans_SC5314	1715713	1715977	MSPC_Peak_523;ID=tF(GAA)5;Name=tF(GAA)5;Peak-1715841-1715928;Summit-1715832-1715833;Dist--9	inf	+	tF(GAA)5
Ca21chr3_C_albicans_SC5314	1721694	1723478	MSPC_Peak_522;ID=orf19.6736;Name=orf19.6736;Peak-1719447-1721336;Summit-1721965-1721973;Dist--630	inf	-	orf19.6736
Ca21chr3_C_albicans_SC5314	1726955	1727583	MSPC_Peak_520;ID=orf19.6734;Name=orf19.6734;Peak-1730057-1732303;Summit-1727352-1727361;Dist--2697	inf	+	orf19.6734
Ca21chr3_C_albicans_SC5314	1727919	1729704	MSPC_Peak_518;ID=orf19.6734;Name=orf19.6734;Peak-1730057-1732303;Summit-1728321-1728337;Dist--1721	inf	+	orf19.6734
Ca21chr3_C_albicans_SC5314	1748429	1749141	MSPC_Peak_512;ID=orf19.6720;Name=orf19.6720;Peak-1748341-1749081;Summit-1748838-1748839;Dist-0	58.849	+	orf19.6720
Ca21chr3_C_albicans_SC5314	1748429	1749141	MSPC_Peak_512;ID=orf19.6720;Name=orf19.6720;Peak-1748341-1749081;Summit-1748887-1748888;Dist-0	58.849	+	orf19.6720
Ca21chr3_C_albicans_SC5314	1753846	1754296	MSPC_Peak_506;ID=orf19.6719;Name=orf19.6719;Peak-1749196-1754028;Summit-1753986-1753987;Dist-0	64	+	orf19.6719
Ca21chr3_C_albicans_SC5314	1757464	1758031	MSPC_Peak_501;ID=orf19.6718;Name=orf19.6718;Peak-1754045-1754852;Summit-1757792-1757793;Dist--2941	inf	-	orf19.6718
Ca21chr3_C_albicans_SC5314	1757464	1758031	MSPC_Peak_501;ID=orf19.6718;Name=orf19.6718;Peak-1754045-1754852;Summit-1757858-1757859;Dist--3007	inf	-	orf19.6718
Ca21chr3_C_albicans_SC5314	1758612	1759302	MSPC_Peak_495;ID=orf19.6715;Name=orf19.6715;Peak-1757968-1758276;Summit-1758876-1758882;Dist--601	inf	-	orf19.6715
Ca21chr3_C_albicans_SC5314	1758612	1759302	MSPC_Peak_495;ID=orf19.6715;Name=orf19.6715;Peak-1757968-1758276;Summit-1758923-1758924;Dist--648	inf	-	orf19.6715
Ca21chr3_C_albicans_SC5314	1760495	1761270	MSPC_Peak_490;ID=orf19.6713;Name=orf19.6713;Peak-1761919-1763124;Summit-1761144-1761161;Dist--759	149.455	+	orf19.6713
Ca21chr3_C_albicans_SC5314	1766335	1766684	MSPC_Peak_484;ID=orf19.6710;Name=orf19.6710;Peak-1765414-1766751;Summit-1766638-1766639;Dist-0	17	+	orf19.6710
Ca21chr3_C_albicans_SC5314	1774971	1775428	MSPC_Peak_479;ID=orf19.6176;Name=orf19.6176;Peak-1774023-1775462;Summit-1774972-1774973;Dist-0	67.79	-	orf19.6176
Ca21chr3_C_albicans_SC5314	1774971	1775428	MSPC_Peak_479;ID=orf19.6176;Name=orf19.6176;Peak-1774023-1775462;Summit-1775058-1775059;Dist-0	67.79	-	orf19.6176
Ca21chr3_C_albicans_SC5314	1781309	1781627	MSPC_Peak_473;ID=orf19.6186;Name=orf19.6186;Peak-1781451-1782515;Summit-1781553-1781554;Dist-0	23	-	orf19.6186
Ca21chr3_C_albicans_SC5314	1785914	1786313	MSPC_Peak_466;ID=orf19.6190;Name=orf19.6190;Peak-1785197-1786285;Summit-1785914-1785935;Dist-0	48.137	-	orf19.6190
Ca21chr3_C_albicans_SC5314	1785914	1786313	MSPC_Peak_466;ID=orf19.6190;Name=orf19.6190;Peak-1785197-1786285;Summit-1786055-1786056;Dist-0	48.137	-	orf19.6190
Ca21chr3_C_albicans_SC5314	1787976	1788457	MSPC_Peak_434;ID=orf19.6191;Name=orf19.6191;Peak-1787713-1788222;Summit-1788114-1788129;Dist-0	83.701	-	orf19.6191
Ca21chr3_C_albicans_SC5314	1792782	1793479	MSPC_Peak_426;ID=orf19.6191;Name=orf19.6191;Peak-1787713-1788222;Summit-1792883-1792884;Dist--4662	123.359	-	orf19.6191
Ca21chr3_C_albicans_SC5314	1792782	1793479	MSPC_Peak_426;ID=orf19.6191;Name=orf19.6191;Peak-1787713-1788222;Summit-1792940-1792941;Dist--4719	123.359	-	orf19.6191
Ca21chr3_C_albicans_SC5314	1792782	1793479	MSPC_Peak_426;ID=orf19.6191;Name=orf19.6191;Peak-1787713-1788222;Summit-1793017-1793018;Dist--4796	123.359	-	orf19.6191
Ca21chr4_C_albicans_SC5314	1131	1451	MSPC_Peak_1186;ID=orf19.362;Name=orf19.362;Peak-983-1660;Summit-1141-1142;Dist-0	14	+	orf19.362
Ca21chr4_C_albicans_SC5314	18123	18625	MSPC_Peak_1183;ID=orf19.5635;Name=orf19.5635;Peak-17801-18460;Summit-18353-18354;Dist-0	139	+	orf19.5635
Ca21chr4_C_albicans_SC5314	25957	26299	MSPC_Peak_1180;ID=orf19.5641;Name=orf19.5641;Peak-25876-27186;Summit-26246-26247;Dist-0	13	-	orf19.5641
Ca21chr4_C_albicans_SC5314	27641	27918	MSPC_Peak_1177;ID=orf19.5642;Name=orf19.5642;Peak-27530-27943;Summit-27811-27812;Dist-0	31	+	orf19.5642
Ca21chr4_C_albicans_SC5314	30564	31171	MSPC_Peak_1174;ID=orf19.5645;Name=orf19.5645;Peak-30660-31982;Summit-30915-30916;Dist-0	31	-	orf19.5645
Ca21chr4_C_albicans_SC5314	41295	41554	MSPC_Peak_1172;ID=orf19.5653;Name=orf19.5653;Peak-39465-41389;Summit-41297-41298;Dist-0	16	+	orf19.5653
Ca21chr4_C_albicans_SC5314	97094	97526	MSPC_Peak_1169;ID=tG(CCC)1;Name=tG(CCC)1;Peak-97328-97398;Summit-97347-97356;Dist-0	inf	-	tG(CCC)1
Ca21chr4_C_albicans_SC5314	101517	101798	MSPC_Peak_1167;ID=orf19.4184;Name=orf19.4184;Peak-101597-103606;Summit-101614-101615;Dist-0	35	-	orf19.4184
Ca21chr4_C_albicans_SC5314	127935	131116	MSPC_Peak_1165;ID=orf19.4167;Name=orf19.4167;Peak-126574-127113;Summit-128274-128281;Dist--1162	inf	-	orf19.4167
Ca21chr4_C_albicans_SC5314	127935	131116	MSPC_Peak_1165;ID=orf19.4167;Name=orf19.4167;Peak-126574-127113;Summit-128308-128309;Dist--1196	inf	-	orf19.4167
Ca21chr4_C_albicans_SC5314	127935	131116	MSPC_Peak_1165;ID=orf19.4167;Name=orf19.4167;Peak-126574-127113;Summit-129012-129018;Dist--1900	inf	-	orf19.4167
Ca21chr4_C_albicans_SC5314	156895	157226	MSPC_Peak_1163;ID=tG(UCC)2;Name=tG(UCC)2;Peak-157071-157141;Summit-157076-157095;Dist-0	inf	+	tG(UCC)2
Ca21chr4_C_albicans_SC5314	161962	162240	MSPC_Peak_1154;ID=orf19.4704;Name=orf19.4704;Peak-159251-163906;Summit-162012-162013;Dist-0	28	+	orf19.4704
Ca21chr4_C_albicans_SC5314	163868	164246	MSPC_Peak_1151;ID=tG(GCC)5;Name=tG(GCC)5;Peak-164100-164170;Summit-164125-164130;Dist-0	inf	-	tG(GCC)5
Ca21chr4_C_albicans_SC5314	168003	168408	MSPC_Peak_1150;ID=tG(GCC)4;Name=tG(GCC)4;Peak-168228-168298;Summit-168238-168257;Dist-0	inf	+	tG(GCC)4
Ca21chr4_C_albicans_SC5314	207844	208682	MSPC_Peak_1147;ID=orf19.4683;Name=orf19.4683;Peak-209114-214612;Summit-208078-208079;Dist--1036	263.212	+	orf19.4683
Ca21chr4_C_albicans_SC5314	207844	208682	MSPC_Peak_1147;ID=orf19.4683;Name=orf19.4683;Peak-209114-214612;Summit-208129-208130;Dist--985	263.212	+	orf19.4683
Ca21chr4_C_albicans_SC5314	245614	245980	MSPC_Peak_1145;ID=tS(UGA)3;Name=tS(UGA)3;Peak-245701-245782;Summit-245748-245749;Dist-0	inf	-	tS(UGA)3
Ca21chr4_C_albicans_SC5314	245614	245980	MSPC_Peak_1145;ID=tS(UGA)3;Name=tS(UGA)3;Peak-245701-245782;Summit-245771-245773;Dist-0	inf	-	tS(UGA)3
Ca21chr4_C_albicans_SC5314	255656	256766	MSPC_Peak_1143;ID=orf19.4660;Name=orf19.4660;Peak-255674-256809;Summit-256691-256692;Dist-0	56	+	orf19.4660
Ca21chr4_C_albicans_SC5314	264593	265255	MSPC_Peak_1140;ID=orf19.4657;Name=orf19.4657;Peak-263911-265413;Summit-264862-264863;Dist-0	33	+	orf19.4657
Ca21chr4_C_albicans_SC5314	271030	271340	MSPC_Peak_1137;ID=orf19.4655;Name=orf19.4655;Peak-268055-270892;Summit-271168-271172;Dist--277	inf	-	orf19.4655
Ca21chr4_C_albicans_SC5314	278561	278836	MSPC_Peak_1134;ID=orf19.4651;Name=orf19.4651;Peak-278273-278692;Summit-278654-278655;Dist-0	31	+	orf19.4651
Ca21chr4_C_albicans_SC5314	281314	282713	MSPC_Peak_1132;ID=orf19.4649;Name=orf19.4649;Peak-283245-286835;Summit-282023-282036;Dist--1210	inf	+	orf19.4649
Ca21chr4_C_albicans_SC5314	284205	285590	MSPC_Peak_1128;ID=orf19.4649;Name=orf19.4649;Peak-283245-286835;Summit-284874-284875;Dist-0	27	+	orf19.4649
Ca21chr4_C_albicans_SC5314	290220	290550	MSPC_Peak_1126;ID=orf19.4646;Name=orf19.4646;Peak-291302-291739;Summit-290419-290445;Dist--858	inf	+	orf19.4646
Ca21chr4_C_albicans_SC5314	292164	292401	MSPC_Peak_1124;ID=orf19.4645;Name=orf19.4645;Peak-292116-294014;Summit-292331-292332;Dist-0	36	+	orf19.4645
Ca21chr4_C_albicans_SC5314	292662	292951	MSPC_Peak_1122;ID=orf19.4645;Name=orf19.4645;Peak-292116-294014;Summit-292777-292778;Dist-0	66	+	orf19.4645
Ca21chr4_C_albicans_SC5314	294301	294639	MSPC_Peak_1107;ID=orf19.4643;Name=orf19.4643;Peak-294807-301958;Summit-294520-294529;Dist--279	inf	+	orf19.4643
Ca21chr4_C_albicans_SC5314	310406	312148	MSPC_Peak_1105;ID=orf19.4635;Name=orf19.4635;Peak-310023-312647;Summit-311481-311482;Dist-0	50	+	orf19.4635
Ca21chr4_C_albicans_SC5314	315405	316306	MSPC_Peak_1103;ID=orf19.4632;Name=orf19.4632;Peak-315765-316283;Summit-315909-315910;Dist-0	214	-	orf19.4632
Ca21chr4_C_albicans_SC5314	317070	318134	MSPC_Peak_1100;ID=orf19.4631;Name=orf19.4631;Peak-317232-318197;Summit-317385-317386;Dist-0	124	-	orf19.4631
Ca21chr4_C_albicans_SC5314	325777	326197	MSPC_Peak_1097;ID=snR72;Name=snR72;Peak-325368-325475;Summit-326025-326026;Dist--551	185.363	-	snR72
Ca21chr4_C_albicans_SC5314	325777	326197	MSPC_Peak_1097;ID=snR73;Name=snR73;Peak-326036-326129;Summit-326079-326080;Dist-0	185.363	-	snR73
Ca21chr4_C_albicans_SC5314	326485	326868	MSPC_Peak_1093;ID=snR75;Name=snR75;Peak-326532-326624;Summit-326581-326582;Dist-0	73	-	snR75
Ca21chr4_C_albicans_SC5314	336880	337972	MSPC_Peak_1091;ID=orf19.4623.3;Name=orf19.4623.3;Peak-337323-337601;Summit-337454-337455;Dist-0	120.546	-	orf19.4623.3
Ca21chr4_C_albicans_SC5314	336880	337972	MSPC_Peak_1091;ID=orf19.4623.3;Name=orf19.4623.3;Peak-337323-337601;Summit-337483-337484;Dist-0	120.546	-	orf19.4623.3
Ca21chr4_C_albicans_SC5314	338219	338596	MSPC_Peak_1088;ID=orf19.4623.3;Name=orf19.4623.3;Peak-337323-337601;Summit-338440-338441;Dist--840	155	-	orf19.4623.3
Ca21chr4_C_albicans_SC5314	345893	346324	MSPC_Peak_1086;ID=orf19.4618;Name=orf19.4618;Peak-346020-347099;Summit-346214-346215;Dist-0	71	-	orf19.4618
Ca21chr4_C_albicans_SC5314	370487	370991	MSPC_Peak_1084;ID=orf19.4602;Name=orf19.4602;Peak-370510-371508;Summit-370778-370779;Dist-0	31	-	orf19.4602
Ca21chr4_C_albicans_SC5314	389503	389873	MSPC_Peak_1082;ID=orf19.4593;Name=orf19.4593;Peak-388309-391839;Summit-389758-389759;Dist-0	18	-	orf19.4593
Ca21chr4_C_albicans_SC5314	400310	402138	MSPC_Peak_1079;ID=orf19.4592;Name=orf19.4592;Peak-394930-396564;Summit-400767-400771;Dist--4204	inf	-	orf19.4592
Ca21chr4_C_albicans_SC5314	402399	403826	MSPC_Peak_1076;ID=orf19.4590;Name=orf19.4590;Peak-405150-408485;Summit-403621-403640;Dist--1511	inf	+	orf19.4590
Ca21chr4_C_albicans_SC5314	404259	404780	MSPC_Peak_1072;ID=orf19.4590;Name=orf19.4590;Peak-405150-408485;Summit-404411-404412;Dist--739	23	+	orf19.4590
Ca21chr4_C_albicans_SC5314	448280	448604	MSPC_Peak_1064;ID=orf19.4560;Name=orf19.4560;Peak-447852-449240;Summit-448469-448470;Dist-0	29	-	orf19.4560
Ca21chr4_C_albicans_SC5314	451825	452611	MSPC_Peak_1062;ID=orf19.2774;Name=orf19.2774;Peak-451524-452684;Summit-452035-452036;Dist-0	68.784	+	orf19.2774
Ca21chr4_C_albicans_SC5314	451825	452611	MSPC_Peak_1062;ID=orf19.2774;Name=orf19.2774;Peak-451524-452684;Summit-452081-452082;Dist-0	68.784	+	orf19.2774
Ca21chr4_C_albicans_SC5314	486145	486713	MSPC_Peak_1060;ID=orf19.2762;Name=orf19.2762;Peak-486188-486718;Summit-486241-486242;Dist-0	89	-	orf19.2762
Ca21chr4_C_albicans_SC5314	498257	498608	MSPC_Peak_1057;ID=orf19.2755;Name=orf19.2755;Peak-498434-499171;Summit-498517-498518;Dist-0	32	-	orf19.2755
Ca21chr4_C_albicans_SC5314	522537	523013	MSPC_Peak_1052;ID=orf19.2747;Name=orf19.2747;Peak-523970-527059;Summit-522660-522668;Dist--1303	116.561	+	orf19.2747
Ca21chr4_C_albicans_SC5314	546633	547503	MSPC_Peak_1048;ID=orf19.2736;Name=orf19.2736;Peak-547141-547581;Summit-547230-547231;Dist-0	136.275	-	orf19.2736
Ca21chr4_C_albicans_SC5314	546633	547503	MSPC_Peak_1048;ID=orf19.2736;Name=orf19.2736;Peak-547141-547581;Summit-547270-547271;Dist-0	136.275	-	orf19.2736
Ca21chr4_C_albicans_SC5314	546633	547503	MSPC_Peak_1048;ID=orf19.2736;Name=orf19.2736;Peak-547141-547581;Summit-547329-547330;Dist-0	136.275	-	orf19.2736
Ca21chr4_C_albicans_SC5314	548611	549124	MSPC_Peak_1043;ID=orf19.2735;Name=orf19.2735;Peak-548009-549178;Summit-548910-548911;Dist-0	97	-	orf19.2735
Ca21chr4_C_albicans_SC5314	560522	560867	MSPC_Peak_1040;ID=orf19.2726;Name=orf19.2726;Peak-558959-559897;Summit-560701-560708;Dist--805	inf	-	orf19.2726
Ca21chr4_C_albicans_SC5314	561978	562321	MSPC_Peak_1038;ID=orf19.2726;Name=orf19.2726;Peak-558959-559897;Summit-562193-562211;Dist--2297	inf	-	orf19.2726
Ca21chr4_C_albicans_SC5314	562654	565215	MSPC_Peak_1035;ID=orf19.2726;Name=orf19.2726;Peak-558959-559897;Summit-563142-563163;Dist--3246	inf	-	orf19.2726
Ca21chr4_C_albicans_SC5314	566081	569527	MSPC_Peak_1033;ID=orf19.2724;Name=orf19.2724;Peak-571922-573418;Summit-566671-566683;Dist--5240	inf	+	orf19.2724
Ca21chr4_C_albicans_SC5314	566081	569527	MSPC_Peak_1033;ID=orf19.2724;Name=orf19.2724;Peak-571922-573418;Summit-566715-566716;Dist--5207	inf	+	orf19.2724
Ca21chr4_C_albicans_SC5314	566081	569527	MSPC_Peak_1033;ID=orf19.2725;Name=orf19.2725;Peak-566926-567228;Summit-569192-569193;Dist--1965	inf	-	orf19.2725
Ca21chr4_C_albicans_SC5314	566081	569527	MSPC_Peak_1033;ID=orf19.2725;Name=orf19.2725;Peak-566926-567228;Summit-569228-569229;Dist--2001	inf	-	orf19.2725
Ca21chr4_C_albicans_SC5314	570610	571297	MSPC_Peak_1030;ID=orf19.2724;Name=orf19.2724;Peak-571922-573418;Summit-570965-570995;Dist--928	inf	+	orf19.2724
Ca21chr4_C_albicans_SC5314	571773	572151	MSPC_Peak_1026;ID=orf19.2724;Name=orf19.2724;Peak-571922-573418;Summit-571962-571963;Dist-0	51	+	orf19.2724
Ca21chr4_C_albicans_SC5314	573878	576025	MSPC_Peak_1023;ID=orf19.2723;Name=orf19.2723;Peak-577406-577852;Summit-574280-574281;Dist--3126	inf	+	orf19.2723
Ca21chr4_C_albicans_SC5314	573878	576025	MSPC_Peak_1023;ID=orf19.2723;Name=orf19.2723;Peak-577406-577852;Summit-574359-574360;Dist--3047	inf	+	orf19.2723
Ca21chr4_C_albicans_SC5314	573878	576025	MSPC_Peak_1023;ID=orf19.2723;Name=orf19.2723;Peak-577406-577852;Summit-575325-575335;Dist--2072	inf	+	orf19.2723
Ca21chr4_C_albicans_SC5314	626475	626941	MSPC_Peak_1018;ID=tT(UGU)1;Name=tT(UGU)1;Peak-627499-627570;Summit-626766-626767;Dist--733	75.743	+	tT(UGU)1
Ca21chr4_C_albicans_SC5314	626475	626941	MSPC_Peak_1018;ID=tT(UGU)1;Name=tT(UGU)1;Peak-627499-627570;Summit-626860-626861;Dist--639	75.743	+	tT(UGU)1
Ca21chr4_C_albicans_SC5314	627317	627664	MSPC_Peak_1005;ID=tT(UGU)1;Name=tT(UGU)1;Peak-627499-627570;Summit-627539-627544;Dist-0	inf	+	tT(UGU)1
Ca21chr4_C_albicans_SC5314	637844	638490	MSPC_Peak_1003;ID=orf19.2685;Name=orf19.2685;Peak-639770-640798;Summit-638174-638189;Dist--1582	inf	+	orf19.2685
Ca21chr4_C_albicans_SC5314	638855	639483	MSPC_Peak_1001;ID=orf19.2685;Name=orf19.2685;Peak-639770-640798;Summit-639287-639288;Dist--483	inf	+	orf19.2685
Ca21chr4_C_albicans_SC5314	638855	639483	MSPC_Peak_1001;ID=orf19.2685;Name=orf19.2685;Peak-639770-640798;Summit-639322-639323;Dist--448	inf	+	orf19.2685
Ca21chr4_C_albicans_SC5314	638855	639483	MSPC_Peak_1001;ID=orf19.2685;Name=orf19.2685;Peak-639770-640798;Summit-639355-639356;Dist--415	inf	+	orf19.2685
Ca21chr4_C_albicans_SC5314	668550	668831	MSPC_Peak_998;ID=orf19.2672;Name=orf19.2672;Peak-668328-670370;Summit-668818-668819;Dist-0	20	+	orf19.2672
Ca21chr4_C_albicans_SC5314	669124	670427	MSPC_Peak_994;ID=orf19.2672;Name=orf19.2672;Peak-668328-670370;Summit-669947-669948;Dist-0	91	+	orf19.2672
Ca21chr4_C_albicans_SC5314	682616	682944	MSPC_Peak_992;ID=orf19.2665;Name=orf19.2665;Peak-682600-686337;Summit-682922-682923;Dist-0	18	+	orf19.2665
Ca21chr4_C_albicans_SC5314	683491	684184	MSPC_Peak_989;ID=orf19.2665;Name=orf19.2665;Peak-682600-686337;Summit-683660-683661;Dist-0	57.857	+	orf19.2665
Ca21chr4_C_albicans_SC5314	683491	684184	MSPC_Peak_989;ID=orf19.2665;Name=orf19.2665;Peak-682600-686337;Summit-683796-683797;Dist-0	57.857	+	orf19.2665
Ca21chr4_C_albicans_SC5314	704580	705536	MSPC_Peak_987;ID=orf19.3363;Name=orf19.3363;Peak-704522-706651;Summit-705013-705014;Dist-0	45	-	orf19.3363
Ca21chr4_C_albicans_SC5314	716159	716404	MSPC_Peak_985;ID=orf19.3369;Name=orf19.3369;Peak-717306-718097;Summit-716274-716278;Dist--1029	inf	+	orf19.3369
Ca21chr4_C_albicans_SC5314	747356	747854	MSPC_Peak_984;ID=orf19.1327;Name=orf19.1327;Peak-745268-747433;Summit-747617-747640;Dist--185	inf	-	orf19.1327
Ca21chr4_C_albicans_SC5314	748173	748515	MSPC_Peak_982;ID=orf19.1327;Name=orf19.1327;Peak-745268-747433;Summit-748338-748339;Dist--906	inf	-	orf19.1327
Ca21chr4_C_albicans_SC5314	749514	750033	MSPC_Peak_980;ID=orf19.1326;Name=orf19.1326;Peak-750848-752818;Summit-749798-749799;Dist--1050	inf	+	orf19.1326
Ca21chr4_C_albicans_SC5314	749514	750033	MSPC_Peak_980;ID=orf19.1326;Name=orf19.1326;Peak-750848-752818;Summit-749823-749826;Dist--1023	inf	+	orf19.1326
Ca21chr4_C_albicans_SC5314	761228	761823	MSPC_Peak_978;ID=orf19.1321;Name=orf19.1321;Peak-762939-764843;Summit-761602-761605;Dist--1335	inf	+	orf19.1321
Ca21chr4_C_albicans_SC5314	772344	772686	MSPC_Peak_977;ID=tQ(UUG)1;Name=tQ(UUG)1;Peak-772498-772584;Summit-772546-772550;Dist-0	inf	-	tQ(UUG)1
Ca21chr4_C_albicans_SC5314	780085	780525	MSPC_Peak_975;ID=tG(GCC)2;Name=tG(GCC)2;Peak-780305-780375;Summit-780325-780334;Dist-0	inf	-	tG(GCC)2
Ca21chr4_C_albicans_SC5314	780927	781235	MSPC_Peak_973;ID=tD(GUC)4;Name=tD(GUC)4;Peak-781047-781118;Summit-781081-781092;Dist-0	inf	-	tD(GUC)4
Ca21chr4_C_albicans_SC5314	781615	782085	MSPC_Peak_967;ID=tD(GUC)4;Name=tD(GUC)4;Peak-781047-781118;Summit-781798-781799;Dist--681	inf	-	tD(GUC)4
Ca21chr4_C_albicans_SC5314	781615	782085	MSPC_Peak_967;ID=tD(GUC)4;Name=tD(GUC)4;Peak-781047-781118;Summit-781828-781833;Dist--711	inf	-	tD(GUC)4
Ca21chr4_C_albicans_SC5314	782452	782858	MSPC_Peak_964;ID=tD(GUC)3;Name=tD(GUC)3;Peak-782574-782645;Summit-782622-782649;Dist-0	inf	+	tD(GUC)3
Ca21chr4_C_albicans_SC5314	885319	886656	MSPC_Peak_960;ID=orf19.5294;Name=orf19.5294;Peak-885562-886701;Summit-885968-885969;Dist-0	108	-	orf19.5294
Ca21chr4_C_albicans_SC5314	893756	894097	MSPC_Peak_956;ID=orf19.5292;Name=orf19.5292;Peak-890369-893170;Summit-893930-893931;Dist--761	202	-	orf19.5292
Ca21chr4_C_albicans_SC5314	894351	894912	MSPC_Peak_952;ID=orf19.5292;Name=orf19.5292;Peak-890369-893170;Summit-894612-894613;Dist--1443	inf	-	orf19.5292
Ca21chr4_C_albicans_SC5314	894351	894912	MSPC_Peak_952;ID=orf19.5292;Name=orf19.5292;Peak-890369-893170;Summit-894692-894695;Dist--1523	inf	-	orf19.5292
Ca21chr4_C_albicans_SC5314	920586	921166	MSPC_Peak_948;ID=orf19.1415;Name=orf19.1415;Peak-923142-925262;Summit-920862-920863;Dist--2280	150.452	+	orf19.1415
Ca21chr4_C_albicans_SC5314	920586	921166	MSPC_Peak_948;ID=orf19.1415;Name=orf19.1415;Peak-923142-925262;Summit-920911-920912;Dist--2231	150.452	+	orf19.1415
Ca21chr4_C_albicans_SC5314	925711	926060	MSPC_Peak_940;ID=orf19.1412;Name=orf19.1412;Peak-928190-928822;Summit-925765-925766;Dist--2425	32	+	orf19.1412
Ca21chr4_C_albicans_SC5314	934690	936540	MSPC_Peak_937;ID=orf19.1409.2;Name=orf19.1409.2;Peak-935121-935405;Summit-935985-935999;Dist--581	inf	-	orf19.1409.2
Ca21chr4_C_albicans_SC5314	936895	938201	MSPC_Peak_931;ID=orf19.1409.1;Name=orf19.1409.1;Peak-936933-937879;Summit-937219-937220;Dist-0	167.959	+	orf19.1409.1
Ca21chr4_C_albicans_SC5314	936895	938201	MSPC_Peak_931;ID=orf19.1409.1;Name=orf19.1409.1;Peak-936933-937879;Summit-937360-937361;Dist-0	167.959	+	orf19.1409.1
Ca21chr4_C_albicans_SC5314	936895	938201	MSPC_Peak_931;ID=orf19.1409.1;Name=orf19.1409.1;Peak-936933-937879;Summit-937858-937859;Dist-0	167.959	+	orf19.1409.1
Ca21chr4_C_albicans_SC5314	936895	938201	MSPC_Peak_931;ID=orf19.1409.2;Name=orf19.1409.2;Peak-935121-935405;Summit-937887-937888;Dist--2483	167.959	-	orf19.1409.2
Ca21chr4_C_albicans_SC5314	972259	972581	MSPC_Peak_924;ID=orf19.3829;Name=orf19.3829;Peak-970615-972261;Summit-972259-972260;Dist-0	30.127	-	orf19.3829
Ca21chr4_C_albicans_SC5314	972259	972581	MSPC_Peak_924;ID=orf19.3829;Name=orf19.3829;Peak-970615-972261;Summit-972287-972288;Dist--27	30.127	-	orf19.3829
Ca21chr4_C_albicans_SC5314	973284	973896	MSPC_Peak_919;ID=orf19.3828;Name=orf19.3828;Peak-973277-973609;Summit-973427-973428;Dist-0	261.722	-	orf19.3828
Ca21chr4_C_albicans_SC5314	973284	973896	MSPC_Peak_919;ID=orf19.3828;Name=orf19.3828;Peak-973277-973609;Summit-973495-973496;Dist-0	261.722	-	orf19.3828
Ca21chr4_C_albicans_SC5314	973284	973896	MSPC_Peak_919;ID=orf19.3828;Name=orf19.3828;Peak-973277-973609;Summit-973545-973546;Dist-0	261.722	-	orf19.3828
Ca21chr4_C_albicans_SC5314	986959	989175	MSPC_Peak_914;ID=orf19.3822;Name=orf19.3822;Peak-987869-989005;Summit-987503-987521;Dist--349	inf	+	orf19.3822
Ca21chr4_C_albicans_SC5314	1006711	1006993	MSPC_Peak_913;ID=tQ(UUG)5;Name=tQ(UUG)5;Peak-1006771-1006856;Summit-1006831-1006847;Dist-0	inf	-	tQ(UUG)5
Ca21chr4_C_albicans_SC5314	1011785	1013392	MSPC_Peak_909;ID=orf19.3810;Name=orf19.3810;Peak-1011783-1012754;Summit-1012462-1012463;Dist-0	inf	+	orf19.3810
Ca21chr4_C_albicans_SC5314	1011785	1013392	MSPC_Peak_909;ID=orf19.3809;Name=orf19.3809;Peak-1013121-1015337;Summit-1013116-1013117;Dist--5	inf	+	orf19.3809
Ca21chr4_C_albicans_SC5314	1015388	1015752	MSPC_Peak_905;ID=tI(AAU)4;Name=tI(AAU)4;Peak-1015529-1015615;Summit-1015551-1015553;Dist-0	inf	+	tI(AAU)4
Ca21chr4_C_albicans_SC5314	1025838	1026366	MSPC_Peak_869;ID=orf19.3801;Name=orf19.3801;Peak-1027634-1030180;Summit-1026067-1026071;Dist--1564	inf	+	orf19.3801
Ca21chr4_C_albicans_SC5314	1045003	1046115	MSPC_Peak_865;ID=orf19.3794;Name=orf19.3794;Peak-1042268-1044124;Summit-1045470-1045482;Dist--1347	inf	-	orf19.3794
Ca21chr4_C_albicans_SC5314	1053834	1054335	MSPC_Peak_858;ID=orf19.3789;Name=orf19.3789;Peak-1054158-1054625;Summit-1054184-1054185;Dist-0	89	-	orf19.3789
Ca21chr4_C_albicans_SC5314	1055463	1056213	MSPC_Peak_852;ID=orf19.3788.1;Name=orf19.3788.1;Peak-1055449-1055950;Summit-1055856-1055860;Dist-0	207.315	+	orf19.3788.1
Ca21chr4_C_albicans_SC5314	1099716	1100302	MSPC_Peak_846;ID=orf19.740;Name=orf19.740;Peak-1097336-1099281;Summit-1099872-1099893;Dist--592	inf	-	orf19.740
Ca21chr4_C_albicans_SC5314	1101333	1101742	MSPC_Peak_843;ID=orf19.740;Name=orf19.740;Peak-1097336-1099281;Summit-1101529-1101548;Dist--2249	inf	-	orf19.740
Ca21chr4_C_albicans_SC5314	1102792	1103122	MSPC_Peak_835;ID=orf19.740;Name=orf19.740;Peak-1097336-1099281;Summit-1102970-1102987;Dist--3690	280.185	-	orf19.740
Ca21chr4_C_albicans_SC5314	1116609	1116873	MSPC_Peak_830;ID=orf19.745;Name=orf19.745;Peak-1115505-1117262;Summit-1116775-1116776;Dist-0	29	+	orf19.745
Ca21chr4_C_albicans_SC5314	1156049	1156350	MSPC_Peak_826;ID=orf19.1290;Name=orf19.1290;Peak-1154756-1156606;Summit-1156205-1156206;Dist-0	29	+	orf19.1290
Ca21chr4_C_albicans_SC5314	1159436	1159693	MSPC_Peak_821;ID=orf19.1789.1;Name=orf19.1789.1;Peak-1159049-1160197;Summit-1159497-1159498;Dist-0	27	+	orf19.1789.1
Ca21chr4_C_albicans_SC5314	1160110	1160462	MSPC_Peak_817;ID=orf19.1789.1;Name=orf19.1789.1;Peak-1159049-1160197;Summit-1160184-1160185;Dist-0	73.754	+	orf19.1789.1
Ca21chr4_C_albicans_SC5314	1160110	1160462	MSPC_Peak_817;ID=orf19.1792;Name=orf19.1792;Peak-1162041-1164398;Summit-1160209-1160210;Dist--1832	73.754	+	orf19.1792
Ca21chr4_C_albicans_SC5314	1164309	1164723	MSPC_Peak_812;ID=orf19.1791;Name=orf19.1791;Peak-1160326-1161801;Summit-1164508-1164519;Dist--2708	inf	-	orf19.1791
Ca21chr4_C_albicans_SC5314	1164309	1164723	MSPC_Peak_812;ID=orf19.1793;Name=orf19.1793;Peak-1167226-1169013;Summit-1164508-1164519;Dist--2708	inf	+	orf19.1793
Ca21chr4_C_albicans_SC5314	1184720	1185174	MSPC_Peak_806;ID=orf19.1799;Name=orf19.1799;Peak-1184245-1186101;Summit-1185078-1185079;Dist-0	27	-	orf19.1799
Ca21chr4_C_albicans_SC5314	1195413	1195914	MSPC_Peak_801;ID=orf19.1802;Name=orf19.1802;Peak-1190626-1192479;Summit-1195688-1195689;Dist--3210	64	-	orf19.1802
Ca21chr4_C_albicans_SC5314	1200126	1200512	MSPC_Peak_797;ID=orf19.1234;Name=orf19.1234;Peak-1204774-1206312;Summit-1200354-1200360;Dist--4415	inf	+	orf19.1234
Ca21chr4_C_albicans_SC5314	1200937	1201267	MSPC_Peak_759;ID=orf19.1234;Name=orf19.1234;Peak-1204774-1206312;Summit-1201111-1201123;Dist--3652	inf	+	orf19.1234
Ca21chr4_C_albicans_SC5314	1201791	1202620	MSPC_Peak_756;ID=orf19.1234;Name=orf19.1234;Peak-1204774-1206312;Summit-1201906-1201907;Dist--2868	inf	+	orf19.1234
Ca21chr4_C_albicans_SC5314	1201791	1202620	MSPC_Peak_756;ID=orf19.1234;Name=orf19.1234;Peak-1204774-1206312;Summit-1202173-1202193;Dist--2582	inf	+	orf19.1234
Ca21chr4_C_albicans_SC5314	1204340	1204589	MSPC_Peak_753;ID=orf19.1234;Name=orf19.1234;Peak-1204774-1206312;Summit-1204393-1204394;Dist--381	57	+	orf19.1234
Ca21chr4_C_albicans_SC5314	1246098	1246647	MSPC_Peak_749;ID=orf19.1252;Name=orf19.1252;Peak-1245692-1247755;Summit-1246586-1246587;Dist-0	48	+	orf19.1252
Ca21chr4_C_albicans_SC5314	1247144	1247987	MSPC_Peak_743;ID=orf19.1252;Name=orf19.1252;Peak-1245692-1247755;Summit-1247235-1247236;Dist-0	29	+	orf19.1252
Ca21chr4_C_albicans_SC5314	1253814	1254405	MSPC_Peak_737;ID=orf19.1254;Name=orf19.1254;Peak-1252053-1254341;Summit-1254093-1254094;Dist-0	75	+	orf19.1254
Ca21chr4_C_albicans_SC5314	1277878	1278226	MSPC_Peak_730;ID=orf19.1264;Name=orf19.1264;Peak-1277083-1279299;Summit-1277897-1277898;Dist-0	13	-	orf19.1264
Ca21chr4_C_albicans_SC5314	1279928	1280495	MSPC_Peak_725;ID=orf19.1264;Name=orf19.1264;Peak-1277083-1279299;Summit-1280242-1280255;Dist--944	inf	-	orf19.1264
Ca21chr4_C_albicans_SC5314	1307015	1307861	MSPC_Peak_722;ID=orf19.1277;Name=orf19.1277;Peak-1305276-1306454;Summit-1307213-1307229;Dist--760	inf	-	orf19.1277
Ca21chr4_C_albicans_SC5314	1318735	1319235	MSPC_Peak_715;ID=orf19.4405;Name=orf19.4405;Peak-1321074-1324130;Summit-1318897-1318905;Dist--2170	155.438	+	orf19.4405
Ca21chr4_C_albicans_SC5314	1319992	1320696	MSPC_Peak_710;ID=orf19.4405;Name=orf19.4405;Peak-1321074-1324130;Summit-1320163-1320173;Dist--902	inf	+	orf19.4405
Ca21chr4_C_albicans_SC5314	1324892	1325312	MSPC_Peak_708;ID=tT(UGU)2;Name=tT(UGU)2;Peak-1325061-1325132;Summit-1325085-1325092;Dist-0	inf	-	tT(UGU)2
Ca21chr4_C_albicans_SC5314	1331506	1331802	MSPC_Peak_703;ID=tS(UGA)2;Name=tS(UGA)2;Peak-1331637-1331718;Summit-1331659-1331673;Dist-0	inf	+	tS(UGA)2
Ca21chr4_C_albicans_SC5314	1381610	1382404	MSPC_Peak_698;ID=orf19.2920;Name=orf19.2920;Peak-1380981-1381535;Summit-1381856-1381862;Dist--322	inf	-	orf19.2920
Ca21chr4_C_albicans_SC5314	1407749	1408667	MSPC_Peak_693;ID=orf19.2903;Name=orf19.2903;Peak-1407229-1409982;Summit-1407921-1407922;Dist-0	88	+	orf19.2903
Ca21chr4_C_albicans_SC5314	1409086	1409322	MSPC_Peak_671;ID=orf19.2903;Name=orf19.2903;Peak-1407229-1409982;Summit-1409183-1409184;Dist-0	48	+	orf19.2903
Ca21chr4_C_albicans_SC5314	1409630	1409939	MSPC_Peak_668;ID=orf19.2903;Name=orf19.2903;Peak-1407229-1409982;Summit-1409784-1409785;Dist-0	34	+	orf19.2903
Ca21chr4_C_albicans_SC5314	1424875	1426361	MSPC_Peak_666;ID=orf19.2892;Name=orf19.2892;Peak-1426618-1429254;Summit-1425781-1425795;Dist--824	inf	+	orf19.2892
Ca21chr4_C_albicans_SC5314	1479093	1479407	MSPC_Peak_662;ID=orf19.2871;Name=orf19.2871;Peak-1478360-1480285;Summit-1479291-1479292;Dist-0	40	-	orf19.2871
Ca21chr4_C_albicans_SC5314	1504466	1504902	MSPC_Peak_659;ID=orf19.3134;Name=orf19.3134;Peak-1502722-1503162;Summit-1504668-1504684;Dist--1507	inf	-	orf19.3134
Ca21chr4_C_albicans_SC5314	1508277	1509466	MSPC_Peak_656;ID=orf19.3133;Name=orf19.3133;Peak-1507275-1509227;Summit-1508794-1508795;Dist-0	60	+	orf19.3133
Ca21chr4_C_albicans_SC5314	1516244	1516483	MSPC_Peak_652;ID=orf19.3129;Name=orf19.3129;Peak-1514961-1516337;Summit-1516270-1516271;Dist-0	16	+	orf19.3129
Ca21chr4_C_albicans_SC5314	1522622	1522953	MSPC_Peak_648;ID=orf19.3127;Name=orf19.3127;Peak-1519161-1520318;Summit-1522761-1522762;Dist--2444	86	-	orf19.3127
Ca21chr4_C_albicans_SC5314	1523395	1524025	MSPC_Peak_644;ID=orf19.3127;Name=orf19.3127;Peak-1519161-1520318;Summit-1523555-1523556;Dist--3238	inf	-	orf19.3127
Ca21chr4_C_albicans_SC5314	1523395	1524025	MSPC_Peak_644;ID=orf19.3127;Name=orf19.3127;Peak-1519161-1520318;Summit-1523581-1523583;Dist--3264	inf	-	orf19.3127
Ca21chr4_C_albicans_SC5314	1524442	1524857	MSPC_Peak_642;ID=orf19.3127;Name=orf19.3127;Peak-1519161-1520318;Summit-1524620-1524628;Dist--4303	inf	-	orf19.3127
Ca21chr4_C_albicans_SC5314	1524442	1524857	MSPC_Peak_642;ID=orf19.3127;Name=orf19.3127;Peak-1519161-1520318;Summit-1524690-1524691;Dist--4373	inf	-	orf19.3127
Ca21chr4_C_albicans_SC5314	1527917	1528319	MSPC_Peak_639;ID=orf19.3126;Name=orf19.3126;Peak-1527936-1529615;Summit-1528222-1528223;Dist-0	31	-	orf19.3126
Ca21chr4_C_albicans_SC5314	1530641	1531010	MSPC_Peak_636;ID=orf19.3124;Name=orf19.3124;Peak-1530629-1531744;Summit-1530883-1530884;Dist-0	59	-	orf19.3124
Ca21chr4_C_albicans_SC5314	1533864	1534118	MSPC_Peak_634;ID=orf19.3123;Name=orf19.3123;Peak-1532862-1534154;Summit-1534054-1534055;Dist-0	26	+	orf19.3123
Ca21chr4_C_albicans_SC5314	1566873	1567153	MSPC_Peak_632;ID=orf19.3099;Name=orf19.3099;Peak-1566846-1567955;Summit-1566971-1566972;Dist-0	31	-	orf19.3099
Ca21chr4_C_albicans_SC5314	1574157	1575537	MSPC_Peak_628;ID=orf19.3097;Name=orf19.3097;Peak-1574337-1575542;Summit-1574560-1574561;Dist-0	125	-	orf19.3097
Ca21chr4_C_albicans_SC5314	1585616	1586091	MSPC_Peak_580;ID=orf19.3087;Name=orf19.3087;Peak-1585505-1586086;Summit-1585961-1585978;Dist-0	79.722	+	orf19.3087
Ca21chr4_C_albicans_SC5314	1597634	1597968	MSPC_Peak_571;ID=orf19.3074;Name=orf19.3074;Peak-1597337-1597996;Summit-1597641-1597642;Dist-0	28	-	orf19.3074
Ca21chr4_C_albicans_SC5314	1601555	1602044	MSPC_Peak_556;ID=orf19.3073;Name=orf19.3073;Peak-1603087-1603443;Summit-1601967-1601968;Dist--1120	155	+	orf19.3073
Ca21chr5_C_albicans_SC5314	1343	2235	MSPC_Peak_515;ID=orf19.5700;Name=orf19.5700;Peak-1918-2427;Summit-2049-2070;Dist-0	85.691	+	orf19.5700
Ca21chr5_C_albicans_SC5314	2778	3123	MSPC_Peak_509;ID=orf19.5698;Name=orf19.5698;Peak-3999-4808;Summit-2993-2994;Dist--1006	116	+	orf19.5698
Ca21chr5_C_albicans_SC5314	10017	10362	MSPC_Peak_503;ID=orf19.5691;Name=orf19.5691;Peak-8946-10154;Summit-10018-10019;Dist-0	13	+	orf19.5691
Ca21chr5_C_albicans_SC5314	14922	15325	MSPC_Peak_496;ID=orf19.5684;Name=orf19.5684;Peak-15077-15475;Summit-15241-15242;Dist-0	46	-	orf19.5684
Ca21chr5_C_albicans_SC5314	23379	24080	MSPC_Peak_491;ID=orf19.979;Name=orf19.979;Peak-23548-29661;Summit-23867-23868;Dist-0	30	-	orf19.979
Ca21chr5_C_albicans_SC5314	28739	29162	MSPC_Peak_486;ID=orf19.979;Name=orf19.979;Peak-23548-29661;Summit-28860-28861;Dist-0	24	-	orf19.979
Ca21chr5_C_albicans_SC5314	33696	34233	MSPC_Peak_480;ID=orf19.976;Name=orf19.976;Peak-33839-35884;Summit-33935-33936;Dist-0	134	-	orf19.976
Ca21chr5_C_albicans_SC5314	35183	35810	MSPC_Peak_474;ID=orf19.976;Name=orf19.976;Peak-33839-35884;Summit-35348-35349;Dist-0	38	-	orf19.976
Ca21chr5_C_albicans_SC5314	66257	66646	MSPC_Peak_470;ID=tS(CAG)1;Name=tS(CAG)1;Peak-66383-66464;Summit-66410-66411;Dist-0	inf	-	tS(CAG)1
Ca21chr5_C_albicans_SC5314	66257	66646	MSPC_Peak_470;ID=tS(CAG)1;Name=tS(CAG)1;Peak-66383-66464;Summit-66435-66441;Dist-0	inf	-	tS(CAG)1
Ca21chr5_C_albicans_SC5314	71270	71694	MSPC_Peak_464;ID=tS(CAG)1;Name=tS(CAG)1;Peak-66383-66464;Summit-71526-71527;Dist--5063	66	-	tS(CAG)1
Ca21chr5_C_albicans_SC5314	73330	74416	MSPC_Peak_458;ID=orf19.951;Name=orf19.951;Peak-71613-72101;Summit-73598-73599;Dist--1498	71.766	-	orf19.951
Ca21chr5_C_albicans_SC5314	73330	74416	MSPC_Peak_458;ID=orf19.949;Name=orf19.949;Peak-74018-76453;Summit-74276-74277;Dist-0	71.766	-	orf19.949
Ca21chr5_C_albicans_SC5314	75739	75997	MSPC_Peak_453;ID=orf19.949;Name=orf19.949;Peak-74018-76453;Summit-75757-75758;Dist-0	28	-	orf19.949
Ca21chr5_C_albicans_SC5314	77064	78124	MSPC_Peak_447;ID=orf19.948;Name=orf19.948;Peak-77014-77355;Summit-77252-77253;Dist-0	154.171	+	orf19.948
Ca21chr5_C_albicans_SC5314	77064	78124	MSPC_Peak_447;ID=orf19.947;Name=orf19.947;Peak-77777-78136;Summit-77854-77855;Dist-0	154.171	-	orf19.947
Ca21chr5_C_albicans_SC5314	77064	78124	MSPC_Peak_447;ID=orf19.947;Name=orf19.947;Peak-77777-78136;Summit-77878-77879;Dist-0	154.171	-	orf19.947
Ca21chr5_C_albicans_SC5314	99765	100007	MSPC_Peak_441;ID=orf19.938;Name=orf19.938;Peak-103156-104601;Summit-99882-99883;Dist--3274	50	+	orf19.938
Ca21chr5_C_albicans_SC5314	101164	101542	MSPC_Peak_412;ID=orf19.938;Name=orf19.938;Peak-103156-104601;Summit-101392-101393;Dist--1764	140	+	orf19.938
Ca21chr5_C_albicans_SC5314	101939	102342	MSPC_Peak_408;ID=orf19.938;Name=orf19.938;Peak-103156-104601;Summit-102121-102146;Dist--1011	inf	+	orf19.938
Ca21chr5_C_albicans_SC5314	108076	108325	MSPC_Peak_405;ID=orf19.933;Name=orf19.933;Peak-122294-122803;Summit-108198-108199;Dist--14096	173	+	orf19.933
Ca21chr5_C_albicans_SC5314	147980	148785	MSPC_Peak_398;ID=orf19.922;Name=orf19.922;Peak-148120-149706;Summit-148413-148414;Dist-0	59	-	orf19.922
Ca21chr5_C_albicans_SC5314	151894	152857	MSPC_Peak_394;ID=orf19.921;Name=orf19.921;Peak-151176-153233;Summit-152158-152159;Dist-0	61	-	orf19.921
Ca21chr5_C_albicans_SC5314	154874	155781	MSPC_Peak_389;ID=orf19.920;Name=orf19.920;Peak-156807-158162;Summit-155592-155600;Dist--1208	inf	+	orf19.920
Ca21chr5_C_albicans_SC5314	159799	160324	MSPC_Peak_383;ID=orf19.568;Name=orf19.568;Peak-159627-160775;Summit-160108-160109;Dist-0	50	-	orf19.568
Ca21chr5_C_albicans_SC5314	160655	160895	MSPC_Peak_378;ID=orf19.568;Name=orf19.568;Peak-159627-160775;Summit-160711-160712;Dist-0	28	-	orf19.568
Ca21chr5_C_albicans_SC5314	161389	161650	MSPC_Peak_374;ID=orf19.568;Name=orf19.568;Peak-159627-160775;Summit-161516-161517;Dist--742	302	-	orf19.568
Ca21chr5_C_albicans_SC5314	188177	188534	MSPC_Peak_364;ID=orf19.581;Name=orf19.581;Peak-186145-188241;Summit-188411-188412;Dist--171	57	-	orf19.581
Ca21chr5_C_albicans_SC5314	217361	217790	MSPC_Peak_359;ID=tE(UUC)3;Name=tE(UUC)3;Peak-217569-217662;Summit-217558-217572;Dist-0	inf	+	tE(UUC)3
Ca21chr5_C_albicans_SC5314	220074	220425	MSPC_Peak_355;ID=tQ(CUG)1;Name=tQ(CUG)1;Peak-220212-220283;Summit-220238-220248;Dist-0	inf	+	tQ(CUG)1
Ca21chr5_C_albicans_SC5314	221652	222047	MSPC_Peak_350;ID=orf19.1969;Name=orf19.1969;Peak-221848-222663;Summit-221962-221963;Dist-0	47	+	orf19.1969
Ca21chr5_C_albicans_SC5314	223122	223762	MSPC_Peak_346;ID=snR32a;Name=snR32a;Peak-223256-223319;Summit-223224-223225;Dist--32	126.339	+	snR32a
Ca21chr5_C_albicans_SC5314	223122	223762	MSPC_Peak_346;ID=orf19.1968;Name=orf19.1968;Peak-223546-223869;Summit-223362-223368;Dist--179	126.339	+	orf19.1968
Ca21chr5_C_albicans_SC5314	226407	227493	MSPC_Peak_329;ID=orf19.1964;Name=orf19.1964;Peak-225963-227465;Summit-226892-226893;Dist-0	74	-	orf19.1964
Ca21chr5_C_albicans_SC5314	236447	237245	MSPC_Peak_324;ID=orf19.1961;Name=orf19.1961;Peak-234864-236456;Summit-236755-236766;Dist--300	inf	-	orf19.1961
Ca21chr5_C_albicans_SC5314	238302	239143	MSPC_Peak_320;ID=orf19.1961;Name=orf19.1961;Peak-234864-236456;Summit-238724-238741;Dist--2269	inf	-	orf19.1961
Ca21chr5_C_albicans_SC5314	241668	242050	MSPC_Peak_317;ID=orf19.1961;Name=orf19.1961;Peak-234864-236456;Summit-241831-241842;Dist--5376	inf	-	orf19.1961
Ca21chr5_C_albicans_SC5314	241668	242050	MSPC_Peak_317;ID=orf19.1961;Name=orf19.1961;Peak-234864-236456;Summit-241881-241882;Dist--5426	inf	-	orf19.1961
Ca21chr5_C_albicans_SC5314	245155	245525	MSPC_Peak_313;ID=orf19.1960;Name=orf19.1960;Peak-244214-245611;Summit-245246-245247;Dist-0	20	-	orf19.1960
Ca21chr5_C_albicans_SC5314	245861	246403	MSPC_Peak_310;ID=orf19.1960;Name=orf19.1960;Peak-244214-245611;Summit-246264-246265;Dist--654	50	-	orf19.1960
Ca21chr5_C_albicans_SC5314	246716	248030	MSPC_Peak_307;ID=orf19.1960;Name=orf19.1960;Peak-244214-245611;Summit-247342-247352;Dist--1732	inf	-	orf19.1960
Ca21chr5_C_albicans_SC5314	250241	250697	MSPC_Peak_303;ID=orf19.1959;Name=orf19.1959;Peak-253350-254321;Summit-250470-250471;Dist--2880	inf	+	orf19.1959
Ca21chr5_C_albicans_SC5314	250241	250697	MSPC_Peak_303;ID=orf19.1959;Name=orf19.1959;Peak-253350-254321;Summit-250495-250496;Dist--2855	inf	+	orf19.1959
Ca21chr5_C_albicans_SC5314	250241	250697	MSPC_Peak_303;ID=orf19.1959;Name=orf19.1959;Peak-253350-254321;Summit-250518-250519;Dist--2832	inf	+	orf19.1959
Ca21chr5_C_albicans_SC5314	254179	254906	MSPC_Peak_300;ID=orf19.1958;Name=orf19.1958;Peak-254747-255256;Summit-254553-254580;Dist--168	inf	+	orf19.1958
Ca21chr5_C_albicans_SC5314	265180	265688	MSPC_Peak_294;ID=snR69;Name=snR69;Peak-265449-265549;Summit-265481-265482;Dist-0	130.513	-	snR69
Ca21chr5_C_albicans_SC5314	265180	265688	MSPC_Peak_294;ID=snR69;Name=snR69;Peak-265449-265549;Summit-265597-265598;Dist--49	130.513	-	snR69
Ca21chr5_C_albicans_SC5314	277373	277790	MSPC_Peak_291;ID=orf19.1945;Name=orf19.1945;Peak-277008-278423;Summit-277653-277654;Dist-0	34	+	orf19.1945
Ca21chr5_C_albicans_SC5314	278766	280068	MSPC_Peak_287;ID=orf19.1944;Name=orf19.1944;Peak-280836-283307;Summit-279878-279888;Dist--949	inf	+	orf19.1944
Ca21chr5_C_albicans_SC5314	290425	290786	MSPC_Peak_285;ID=orf19.1940;Name=orf19.1940;Peak-290443-291183;Summit-290565-290566;Dist-0	73	-	orf19.1940
Ca21chr5_C_albicans_SC5314	295867	296296	MSPC_Peak_282;ID=orf19.1936;Name=orf19.1936;Peak-294667-296523;Summit-296048-296049;Dist-0	30	+	orf19.1936
Ca21chr5_C_albicans_SC5314	302459	302829	MSPC_Peak_280;ID=orf19.1932;Name=orf19.1932;Peak-303390-305522;Summit-302675-302676;Dist--715	198	+	orf19.1932
Ca21chr5_C_albicans_SC5314	319101	319636	MSPC_Peak_276;ID=orf19.4133;Name=orf19.4133;Peak-319510-320892;Summit-319543-319544;Dist-0	46	-	orf19.4133
Ca21chr5_C_albicans_SC5314	337204	337668	MSPC_Peak_261;ID=orf19.4145;Name=orf19.4145;Peak-333155-336412;Summit-337347-337348;Dist--936	inf	-	orf19.4145
Ca21chr5_C_albicans_SC5314	337204	337668	MSPC_Peak_261;ID=orf19.4146;Name=orf19.4146;Peak-338300-338620;Summit-337383-337384;Dist--917	inf	+	orf19.4146
Ca21chr5_C_albicans_SC5314	337204	337668	MSPC_Peak_261;ID=orf19.4146;Name=orf19.4146;Peak-338300-338620;Summit-337408-337409;Dist--892	inf	+	orf19.4146
Ca21chr5_C_albicans_SC5314	342914	344149	MSPC_Peak_258;ID=orf19.4149.1;Name=orf19.4149.1;Peak-342916-343766;Summit-343474-343475;Dist-0	50.91	+	orf19.4149.1
Ca21chr5_C_albicans_SC5314	342914	344149	MSPC_Peak_258;ID=orf19.4149.1;Name=orf19.4149.1;Peak-342916-343766;Summit-343599-343600;Dist-0	50.91	+	orf19.4149.1
Ca21chr5_C_albicans_SC5314	429912	430499	MSPC_Peak_253;ID=orf19.3181.1;Name=orf19.3181.1;Peak-428884-429048;Summit-430210-430211;Dist--1163	80	-	orf19.3181.1
Ca21chr5_C_albicans_SC5314	438002	438351	MSPC_Peak_249;ID=orf19.3176;Name=orf19.3176;Peak-435999-437588;Summit-438141-438142;Dist--554	108	-	orf19.3176
Ca21chr5_C_albicans_SC5314	446674	447211	MSPC_Peak_244;ID=orf19.3171;Name=orf19.3171;Peak-446995-448569;Summit-447191-447192;Dist-0	20	-	orf19.3171
Ca21chr5_C_albicans_SC5314	447784	448478	MSPC_Peak_241;ID=orf19.3171;Name=orf19.3171;Peak-446995-448569;Summit-447834-447835;Dist-0	22	-	orf19.3171
Ca21chr5_C_albicans_SC5314	449126	449402	MSPC_Peak_236;ID=orf19.3171;Name=orf19.3171;Peak-446995-448569;Summit-449247-449250;Dist--679	inf	-	orf19.3171
Ca21chr5_C_albicans_SC5314	450355	450654	MSPC_Peak_231;ID=orf19.3171;Name=orf19.3171;Peak-446995-448569;Summit-450379-450380;Dist--1811	27	-	orf19.3171
Ca21chr5_C_albicans_SC5314	487577	487861	MSPC_Peak_223;ID=orf19.4225;Name=orf19.4225;Peak-484186-487140;Summit-487599-487600;Dist--460	24	-	orf19.4225
Ca21chr5_C_albicans_SC5314	496601	496962	MSPC_Peak_221;ID=orf19.4231;Name=orf19.4231;Peak-498728-499921;Summit-496802-496820;Dist--1909	inf	+	orf19.4231
Ca21chr5_C_albicans_SC5314	529958	530576	MSPC_Peak_217;ID=orf19.4246;Name=orf19.4246;Peak-529708-531501;Summit-530490-530491;Dist-0	37	+	orf19.4246
Ca21chr5_C_albicans_SC5314	547156	547684	MSPC_Peak_214;ID=orf19.4257;Name=orf19.4257;Peak-547677-553247;Summit-547280-547305;Dist--373	inf	+	orf19.4257
Ca21chr5_C_albicans_SC5314	555171	555423	MSPC_Peak_211;ID=orf19.4264;Name=orf19.4264;Peak-562920-563825;Summit-555172-555173;Dist--7748	16	+	orf19.4264
Ca21chr5_C_albicans_SC5314	558589	558946	MSPC_Peak_209;ID=orf19.4262;Name=orf19.4262;Peak-557647-559089;Summit-558854-558855;Dist-0	29	-	orf19.4262
Ca21chr5_C_albicans_SC5314	611691	611927	MSPC_Peak_198;ID=orf19.4290;Name=orf19.4290;Peak-611366-612328;Summit-611772-611773;Dist-0	15	+	orf19.4290
Ca21chr5_C_albicans_SC5314	612176	612449	MSPC_Peak_195;ID=orf19.4290;Name=orf19.4290;Peak-611366-612328;Summit-612177-612178;Dist-0	13	+	orf19.4290
Ca21chr5_C_albicans_SC5314	625918	626514	MSPC_Peak_191;ID=orf19.4304;Name=orf19.4304;Peak-626103-627851;Summit-626209-626210;Dist-0	279	-	orf19.4304
Ca21chr5_C_albicans_SC5314	627111	627911	MSPC_Peak_189;ID=orf19.4304;Name=orf19.4304;Peak-626103-627851;Summit-627176-627177;Dist-0	56.864	-	orf19.4304
Ca21chr5_C_albicans_SC5314	627111	627911	MSPC_Peak_189;ID=orf19.4304;Name=orf19.4304;Peak-626103-627851;Summit-627234-627235;Dist-0	56.864	-	orf19.4304
Ca21chr5_C_albicans_SC5314	640184	640620	MSPC_Peak_185;ID=orf19.4309;Name=orf19.4309;Peak-639005-640030;Summit-640419-640427;Dist--390	inf	-	orf19.4309
Ca21chr5_C_albicans_SC5314	653783	654175	MSPC_Peak_183;ID=orf19.4318;Name=orf19.4318;Peak-651946-653658;Summit-653959-653973;Dist--302	inf	-	orf19.4318
Ca21chr5_C_albicans_SC5314	654567	655018	MSPC_Peak_178;ID=orf19.4320;Name=orf19.4320;Peak-654510-654890;Summit-654804-654805;Dist-0	226.844	-	orf19.4320
Ca21chr5_C_albicans_SC5314	654567	655018	MSPC_Peak_178;ID=orf19.4320;Name=orf19.4320;Peak-654510-654890;Summit-654826-654827;Dist-0	226.844	-	orf19.4320
Ca21chr5_C_albicans_SC5314	654567	655018	MSPC_Peak_178;ID=orf19.4320;Name=orf19.4320;Peak-654510-654890;Summit-654852-654853;Dist-0	226.844	-	orf19.4320
Ca21chr5_C_albicans_SC5314	683003	684048	MSPC_Peak_173;ID=orf19.4336;Name=orf19.4336;Peak-683005-683682;Summit-683593-683594;Dist-0	20	+	orf19.4336
Ca21chr5_C_albicans_SC5314	707610	708321	MSPC_Peak_169;ID=orf19.4346;Name=orf19.4346;Peak-699638-705913;Summit-707792-707793;Dist--1880	inf	-	orf19.4346
Ca21chr5_C_albicans_SC5314	707610	708321	MSPC_Peak_169;ID=orf19.4347;Name=orf19.4347;Peak-709994-711913;Summit-708086-708087;Dist--1908	inf	+	orf19.4347
Ca21chr5_C_albicans_SC5314	707610	708321	MSPC_Peak_169;ID=orf19.4347;Name=orf19.4347;Peak-709994-711913;Summit-708190-708191;Dist--1804	inf	+	orf19.4347
Ca21chr5_C_albicans_SC5314	724451	724705	MSPC_Peak_165;ID=orf19.4349;Name=orf19.4349;Peak-716895-719339;Summit-724499-724500;Dist--5161	13	-	orf19.4349
Ca21chr5_C_albicans_SC5314	725239	725540	MSPC_Peak_161;ID=orf19.4349;Name=orf19.4349;Peak-716895-719339;Summit-725411-725412;Dist--6073	55	-	orf19.4349
Ca21chr5_C_albicans_SC5314	741049	741374	MSPC_Peak_157;ID=orf19.2652;Name=orf19.2652;Peak-741779-742438;Summit-741200-741219;Dist--561	inf	+	orf19.2652
Ca21chr5_C_albicans_SC5314	769461	770686	MSPC_Peak_155;ID=tE(UUC)5;Name=tE(UUC)5;Peak-769641-769734;Summit-769696-769709;Dist-0	inf	+	tE(UUC)5
Ca21chr5_C_albicans_SC5314	772719	773209	MSPC_Peak_153;ID=orf19.2638.1;Name=orf19.2638.1;Peak-775495-775710;Summit-772967-772991;Dist--2505	inf	+	orf19.2638.1
Ca21chr5_C_albicans_SC5314	776748	777202	MSPC_Peak_149;ID=orf19.2639;Name=orf19.2639;Peak-768150-768671;Summit-776930-776931;Dist--8260	51.902	-	orf19.2639
Ca21chr5_C_albicans_SC5314	776748	777202	MSPC_Peak_149;ID=orf19.2639;Name=orf19.2639;Peak-768150-768671;Summit-777000-777001;Dist--8330	51.902	-	orf19.2639
Ca21chr5_C_albicans_SC5314	785003	787493	MSPC_Peak_145;ID=orf19.6659;Name=orf19.6659;Peak-785599-787305;Summit-785206-785207;Dist--393	274.681	+	orf19.6659
Ca21chr5_C_albicans_SC5314	785003	787493	MSPC_Peak_145;ID=orf19.6659;Name=orf19.6659;Peak-785599-787305;Summit-786267-786268;Dist-0	274.681	+	orf19.6659
Ca21chr5_C_albicans_SC5314	785003	787493	MSPC_Peak_145;ID=orf19.6659;Name=orf19.6659;Peak-785599-787305;Summit-787103-787104;Dist-0	274.681	+	orf19.6659
Ca21chr5_C_albicans_SC5314	793100	794112	MSPC_Peak_132;ID=orf19.6662;Name=orf19.6662;Peak-792500-793045;Summit-793308-793309;Dist--264	256.224	-	orf19.6662
Ca21chr5_C_albicans_SC5314	793100	794112	MSPC_Peak_132;ID=orf19.6663;Name=orf19.6663;Peak-793466-793783;Summit-793521-793522;Dist-0	256.224	-	orf19.6663
Ca21chr5_C_albicans_SC5314	796556	797070	MSPC_Peak_129;ID=orf19.6665;Name=orf19.6665;Peak-794542-796920;Summit-796880-796881;Dist-0	44	+	orf19.6665
Ca21chr5_C_albicans_SC5314	828292	829386	MSPC_Peak_126;ID=orf19.1120;Name=orf19.1120;Peak-829537-829962;Summit-828570-828578;Dist--960	inf	+	orf19.1120
Ca21chr5_C_albicans_SC5314	830726	831067	MSPC_Peak_123;ID=orf19.1119;Name=orf19.1119;Peak-830668-833547;Summit-830920-830921;Dist-0	48	-	orf19.1119
Ca21chr5_C_albicans_SC5314	853231	853530	MSPC_Peak_119;ID=orf19.1106;Name=orf19.1106;Peak-848594-850948;Summit-853314-853315;Dist--2367	72	-	orf19.1106
Ca21chr5_C_albicans_SC5314	854588	854844	MSPC_Peak_118;ID=orf19.1105.2;Name=orf19.1105.2;Peak-856605-856859;Summit-854688-854689;Dist--1917	inf	+	orf19.1105.2
Ca21chr5_C_albicans_SC5314	854588	854844	MSPC_Peak_118;ID=orf19.1105.2;Name=orf19.1105.2;Peak-856605-856859;Summit-854718-854719;Dist--1887	inf	+	orf19.1105.2
Ca21chr5_C_albicans_SC5314	890738	891136	MSPC_Peak_114;ID=orf19.1287;Name=orf19.1287;Peak-891567-892709;Summit-890943-890948;Dist--620	inf	+	orf19.1287
Ca21chr5_C_albicans_SC5314	896560	897846	MSPC_Peak_110;ID=orf19.1286;Name=orf19.1286;Peak-896484-896840;Summit-896841-896853;Dist--2	inf	-	orf19.1286
Ca21chr5_C_albicans_SC5314	911783	912082	MSPC_Peak_106;ID=orf19.1281;Name=orf19.1281;Peak-910882-911547;Summit-911993-911994;Dist--447	38	-	orf19.1281
Ca21chr5_C_albicans_SC5314	921935	922362	MSPC_Peak_103;ID=orf19.3895;Name=orf19.3895;Peak-919805-921556;Summit-922126-922127;Dist--571	inf	-	orf19.3895
Ca21chr5_C_albicans_SC5314	921935	922362	MSPC_Peak_103;ID=orf19.3895;Name=orf19.3895;Peak-919805-921556;Summit-922159-922160;Dist--604	inf	-	orf19.3895
Ca21chr5_C_albicans_SC5314	922782	923180	MSPC_Peak_99;ID=orf19.3895;Name=orf19.3895;Peak-919805-921556;Summit-922979-922998;Dist--1424	inf	-	orf19.3895
Ca21chr5_C_albicans_SC5314	923536	923999	MSPC_Peak_96;ID=orf19.3897;Name=orf19.3897;Peak-924687-925949;Summit-923762-923784;Dist--904	inf	+	orf19.3897
Ca21chr5_C_albicans_SC5314	924426	924684	MSPC_Peak_93;ID=orf19.3897;Name=orf19.3897;Peak-924687-925949;Summit-924543-924544;Dist--144	58	+	orf19.3897
Ca21chr5_C_albicans_SC5314	945502	946458	MSPC_Peak_89;ID=orf19.3911;Name=orf19.3911;Peak-946010-947362;Summit-946442-946443;Dist-0	21	-	orf19.3911
Ca21chr5_C_albicans_SC5314	975581	975944	MSPC_Peak_86;ID=orf19.3929;Name=orf19.3929;Peak-974703-975740;Summit-975599-975600;Dist-0	24	+	orf19.3929
Ca21chr5_C_albicans_SC5314	996841	997806	MSPC_Peak_74;ID=orf19.3942.1;Name=orf19.3942.1;Peak-997147-997796;Summit-997280-997281;Dist-0	59.958	-	orf19.3942.1
Ca21chr5_C_albicans_SC5314	996841	997806	MSPC_Peak_74;ID=orf19.3942.1;Name=orf19.3942.1;Peak-997147-997796;Summit-997482-997500;Dist-0	59.958	-	orf19.3942.1
Ca21chr5_C_albicans_SC5314	999252	999511	MSPC_Peak_72;ID=orf19.3944;Name=orf19.3944;Peak-998281-1000623;Summit-999494-999495;Dist-0	20	-	orf19.3944
Ca21chr5_C_albicans_SC5314	1025651	1026491	MSPC_Peak_69;ID=orf19.3959;Name=orf19.3959;Peak-1025693-1029517;Summit-1026261-1026262;Dist-0	51	-	orf19.3959
Ca21chr5_C_albicans_SC5314	1026815	1027115	MSPC_Peak_67;ID=orf19.3959;Name=orf19.3959;Peak-1025693-1029517;Summit-1027073-1027074;Dist-0	19	-	orf19.3959
Ca21chr5_C_albicans_SC5314	1034937	1035321	MSPC_Peak_64;ID=tA(AGC)5;Name=tA(AGC)5;Peak-1035141-1035213;Summit-1035152-1035165;Dist-0	inf	+	tA(AGC)5
Ca21chr5_C_albicans_SC5314	1041172	1042858	MSPC_Peak_61;ID=orf19.3967;Name=orf19.3967;Peak-1041235-1044198;Summit-1041545-1041546;Dist-0	131.509	+	orf19.3967
Ca21chr5_C_albicans_SC5314	1041172	1042858	MSPC_Peak_61;ID=orf19.3967;Name=orf19.3967;Peak-1041235-1044198;Summit-1042414-1042415;Dist-0	131.509	+	orf19.3967
Ca21chr5_C_albicans_SC5314	1043903	1044382	MSPC_Peak_58;ID=orf19.3967;Name=orf19.3967;Peak-1041235-1044198;Summit-1044063-1044064;Dist-0	34	+	orf19.3967
Ca21chr5_C_albicans_SC5314	1046174	1046761	MSPC_Peak_55;ID=orf19.3968;Name=orf19.3968;Peak-1051721-1052032;Summit-1046464-1046482;Dist--5240	inf	+	orf19.3968
Ca21chr5_C_albicans_SC5314	1047265	1049711	MSPC_Peak_52;ID=orf19.3968;Name=orf19.3968;Peak-1051721-1052032;Summit-1047935-1047949;Dist--3773	inf	+	orf19.3968
Ca21chr5_C_albicans_SC5314	1050525	1052069	MSPC_Peak_50;ID=orf19.3968;Name=orf19.3968;Peak-1051721-1052032;Summit-1051246-1051251;Dist--471	inf	+	orf19.3968
Ca21chr5_C_albicans_SC5314	1052386	1052866	MSPC_Peak_46;ID=orf19.3969;Name=orf19.3969;Peak-1053870-1056014;Summit-1052859-1052860;Dist--1011	21	+	orf19.3969
Ca21chr5_C_albicans_SC5314	1055644	1057036	MSPC_Peak_44;ID=orf19.3971;Name=orf19.3971;Peak-1059086-1059844;Summit-1056620-1056621;Dist--2466	inf	+	orf19.3971
Ca21chr5_C_albicans_SC5314	1057356	1057982	MSPC_Peak_43;ID=orf19.3971;Name=orf19.3971;Peak-1059086-1059844;Summit-1057663-1057664;Dist--1423	inf	+	orf19.3971
Ca21chr5_C_albicans_SC5314	1057356	1057982	MSPC_Peak_43;ID=orf19.3971;Name=orf19.3971;Peak-1059086-1059844;Summit-1057777-1057788;Dist--1299	inf	+	orf19.3971
Ca21chr5_C_albicans_SC5314	1076278	1076517	MSPC_Peak_42;ID=orf19.3981;Name=orf19.3981;Peak-1074239-1076005;Summit-1076374-1076375;Dist--370	103	-	orf19.3981
Ca21chr5_C_albicans_SC5314	1078131	1078367	MSPC_Peak_40;ID=orf19.3982;Name=orf19.3982;Peak-1078944-1080692;Summit-1078243-1078244;Dist--701	213	+	orf19.3982
Ca21chr5_C_albicans_SC5314	1086576	1086974	MSPC_Peak_27;ID=orf19.3984;Name=orf19.3984;Peak-1088560-1091088;Summit-1086851-1086852;Dist--1709	224.281	+	orf19.3984
Ca21chr5_C_albicans_SC5314	1086576	1086974	MSPC_Peak_27;ID=orf19.3984;Name=orf19.3984;Peak-1088560-1091088;Summit-1086903-1086904;Dist--1657	224.281	+	orf19.3984
Ca21chr5_C_albicans_SC5314	1101181	1101630	MSPC_Peak_23;ID=orf19.3994;Name=orf19.3994;Peak-1101287-1102477;Summit-1101396-1101397;Dist-0	15	-	orf19.3994
Ca21chr5_C_albicans_SC5314	1140101	1140899	MSPC_Peak_18;ID=orf19.4012;Name=orf19.4012;Peak-1139318-1140232;Summit-1140229-1140230;Dist-0	85	+	orf19.4012
Ca21chr5_C_albicans_SC5314	1150929	1151153	MSPC_Peak_14;ID=orf19.4022;Name=orf19.4022;Peak-1150309-1150803;Summit-1150957-1150958;Dist--155	20	-	orf19.4022
Ca21chr5_C_albicans_SC5314	1165745	1167297	MSPC_Peak_11;ID=orf19.4035;Name=orf19.4035;Peak-1165960-1167315;Summit-1166013-1166014;Dist-0	42.98	-	orf19.4035
Ca21chr5_C_albicans_SC5314	1165745	1167297	MSPC_Peak_11;ID=orf19.4035;Name=orf19.4035;Peak-1165960-1167315;Summit-1166766-1166767;Dist-0	42.98	-	orf19.4035
Ca21chr5_C_albicans_SC5314	1169319	1169580	MSPC_Peak_7;ID=orf19.4036;Name=orf19.4036;Peak-1168153-1169469;Summit-1169377-1169378;Dist-0	36	+	orf19.4036
Ca21chr5_C_albicans_SC5314	1186650	1187254	MSPC_Peak_3;ID=orf19.4054;Name=orf19.4054;Peak-1182169-1182927;Summit-1186965-1186966;Dist--4039	156	-	orf19.4054
Ca21chr6_C_albicans_SC5314	104	696	MSPC_Peak_442;ID=orf19.6338;Name=orf19.6338;Peak-3622-4008;Summit-459-475;Dist--3148	247.239	+	orf19.6338
Ca21chr6_C_albicans_SC5314	998	2034	MSPC_Peak_438;ID=orf19.6338;Name=orf19.6338;Peak-3622-4008;Summit-1071-1072;Dist--2551	107.595	+	orf19.6338
Ca21chr6_C_albicans_SC5314	998	2034	MSPC_Peak_438;ID=orf19.6338;Name=orf19.6338;Peak-3622-4008;Summit-1744-1745;Dist--1878	107.595	+	orf19.6338
Ca21chr6_C_albicans_SC5314	6843	7126	MSPC_Peak_436;ID=tL(CAA)5;Name=tL(CAA)5;Peak-6934-7044;Summit-6976-6983;Dist-0	inf	+	tL(CAA)5
Ca21chr6_C_albicans_SC5314	11822	12255	MSPC_Peak_432;ID=orf19.6327;Name=orf19.6327;Peak-11956-12549;Summit-12058-12059;Dist-0	27	-	orf19.6327
Ca21chr6_C_albicans_SC5314	24178	24746	MSPC_Peak_430;ID=orf19.1180;Name=orf19.1180;Peak-23430-24677;Summit-24436-24437;Dist-0	73	+	orf19.1180
Ca21chr6_C_albicans_SC5314	31119	31415	MSPC_Peak_428;ID=orf19.1187;Name=orf19.1187;Peak-32572-35133;Summit-31303-31304;Dist--1269	78	+	orf19.1187
Ca21chr6_C_albicans_SC5314	32156	32987	MSPC_Peak_422;ID=orf19.1187;Name=orf19.1187;Peak-32572-35133;Summit-32980-32981;Dist-0	18	+	orf19.1187
Ca21chr6_C_albicans_SC5314	33916	35403	MSPC_Peak_419;ID=orf19.1187;Name=orf19.1187;Peak-32572-35133;Summit-34013-34014;Dist-0	23	+	orf19.1187
Ca21chr6_C_albicans_SC5314	38833	39313	MSPC_Peak_401;ID=orf19.1189;Name=orf19.1189;Peak-39779-41833;Summit-38995-39001;Dist--779	inf	+	orf19.1189
Ca21chr6_C_albicans_SC5314	41239	44101	MSPC_Peak_395;ID=orf19.1191;Name=orf19.1191;Peak-47177-49597;Summit-42848-42857;Dist--4321	inf	+	orf19.1191
Ca21chr6_C_albicans_SC5314	54237	54636	MSPC_Peak_388;ID=orf19.1193;Name=orf19.1193;Peak-54387-56126;Summit-54549-54550;Dist-0	15	-	orf19.1193
Ca21chr6_C_albicans_SC5314	55702	56145	MSPC_Peak_382;ID=orf19.1193;Name=orf19.1193;Peak-54387-56126;Summit-55702-55703;Dist-0	14	-	orf19.1193
Ca21chr6_C_albicans_SC5314	77218	79659	MSPC_Peak_376;ID=orf19.4214;Name=orf19.4214;Peak-78972-79373;Summit-79342-79364;Dist-0	inf	-	orf19.4214
Ca21chr6_C_albicans_SC5314	90017	90457	MSPC_Peak_369;ID=orf19.4211;Name=orf19.4211;Peak-87506-89365;Summit-90230-90264;Dist--866	inf	-	orf19.4211
Ca21chr6_C_albicans_SC5314	90789	91502	MSPC_Peak_363;ID=orf19.4211;Name=orf19.4211;Peak-87506-89365;Summit-90968-90988;Dist--1604	inf	-	orf19.4211
Ca21chr6_C_albicans_SC5314	114590	115643	MSPC_Peak_357;ID=orf19.4193.1;Name=orf19.4193.1;Peak-114731-115590;Summit-115059-115060;Dist-0	164.414	-	orf19.4193.1
Ca21chr6_C_albicans_SC5314	114590	115643	MSPC_Peak_357;ID=orf19.4193.1;Name=orf19.4193.1;Peak-114731-115590;Summit-115121-115122;Dist-0	164.414	-	orf19.4193.1
Ca21chr6_C_albicans_SC5314	124343	125456	MSPC_Peak_352;ID=orf19.3656;Name=orf19.3656;Peak-124569-126008;Summit-125363-125364;Dist-0	63	-	orf19.3656
Ca21chr6_C_albicans_SC5314	131912	132231	MSPC_Peak_348;ID=orf19.3651;Name=orf19.3651;Peak-132037-133290;Summit-132230-132231;Dist-0	13	-	orf19.3651
Ca21chr6_C_albicans_SC5314	132582	133309	MSPC_Peak_343;ID=orf19.3651;Name=orf19.3651;Peak-132037-133290;Summit-132620-132621;Dist-0	24	-	orf19.3651
Ca21chr6_C_albicans_SC5314	155610	155868	MSPC_Peak_340;ID=orf19.3642;Name=orf19.3642;Peak-158331-159587;Summit-155714-155715;Dist--2617	167	+	orf19.3642
Ca21chr6_C_albicans_SC5314	157066	158247	MSPC_Peak_336;ID=orf19.3642;Name=orf19.3642;Peak-158331-159587;Summit-157706-157707;Dist--625	inf	+	orf19.3642
Ca21chr6_C_albicans_SC5314	157066	158247	MSPC_Peak_336;ID=orf19.3642;Name=orf19.3642;Peak-158331-159587;Summit-157753-157756;Dist--576	inf	+	orf19.3642
Ca21chr6_C_albicans_SC5314	162955	163395	MSPC_Peak_332;ID=orf19.84;Name=orf19.84;Peak-159898-161777;Summit-163120-163145;Dist--1344	inf	-	orf19.84
Ca21chr6_C_albicans_SC5314	164480	164722	MSPC_Peak_328;ID=orf19.85;Name=orf19.85;Peak-165076-165567;Summit-164673-164674;Dist--403	93	+	orf19.85
Ca21chr6_C_albicans_SC5314	169856	170715	MSPC_Peak_319;ID=orf19.88;Name=orf19.88;Peak-170172-171374;Summit-170454-170455;Dist-0	105	-	orf19.88
Ca21chr6_C_albicans_SC5314	170966	171655	MSPC_Peak_279;ID=orf19.88;Name=orf19.88;Peak-170172-171374;Summit-170969-170970;Dist-0	18	-	orf19.88
Ca21chr6_C_albicans_SC5314	176205	176602	MSPC_Peak_275;ID=orf19.90;Name=orf19.90;Peak-174667-176931;Summit-176468-176469;Dist-0	66	+	orf19.90
Ca21chr6_C_albicans_SC5314	208637	208944	MSPC_Peak_272;ID=orf19.111;Name=orf19.111;Peak-206049-207755;Summit-208797-208802;Dist--1043	inf	-	orf19.111
Ca21chr6_C_albicans_SC5314	218377	219759	MSPC_Peak_268;ID=orf19.118;Name=orf19.118;Peak-218253-219563;Summit-219471-219472;Dist-0	95	+	orf19.118
Ca21chr6_C_albicans_SC5314	270616	271161	MSPC_Peak_264;ID=orf19.3448;Name=orf19.3448;Peak-272389-272730;Summit-270848-270884;Dist--1506	inf	+	orf19.3448
Ca21chr6_C_albicans_SC5314	309570	310487	MSPC_Peak_259;ID=orf19.3434;Name=orf19.3434;Peak-298270-301239;Summit-310072-310073;Dist--8834	125.529	-	orf19.3434
Ca21chr6_C_albicans_SC5314	309570	310487	MSPC_Peak_259;ID=orf19.3434;Name=orf19.3434;Peak-298270-301239;Summit-310102-310103;Dist--8864	125.529	-	orf19.3434
Ca21chr6_C_albicans_SC5314	318285	318827	MSPC_Peak_254;ID=orf19.3431;Name=orf19.3431;Peak-314089-317775;Summit-318540-318544;Dist--766	inf	-	orf19.3431
Ca21chr6_C_albicans_SC5314	332158	332666	MSPC_Peak_250;ID=orf19.3426;Name=orf19.3426;Peak-331257-332450;Summit-332228-332229;Dist-0	37	+	orf19.3426
Ca21chr6_C_albicans_SC5314	357052	357906	MSPC_Peak_246;ID=orf19.3415.1;Name=orf19.3415.1;Peak-357012-357849;Summit-357747-357766;Dist-0	148.458	+	orf19.3415.1
Ca21chr6_C_albicans_SC5314	363741	365127	MSPC_Peak_242;ID=orf19.3414;Name=orf19.3414;Peak-364264-365076;Summit-364519-364520;Dist-0	102.514	-	orf19.3414
Ca21chr6_C_albicans_SC5314	363741	365127	MSPC_Peak_242;ID=orf19.3414;Name=orf19.3414;Peak-364264-365076;Summit-364575-364576;Dist-0	102.514	-	orf19.3414
Ca21chr6_C_albicans_SC5314	363741	365127	MSPC_Peak_242;ID=orf19.3414;Name=orf19.3414;Peak-364264-365076;Summit-364926-364927;Dist-0	102.514	-	orf19.3414
Ca21chr6_C_albicans_SC5314	365711	367207	MSPC_Peak_237;ID=orf19.3413;Name=orf19.3413;Peak-366036-366344;Summit-366244-366245;Dist-0	inf	+	orf19.3413
Ca21chr6_C_albicans_SC5314	365711	367207	MSPC_Peak_237;ID=orf19.3413;Name=orf19.3413;Peak-366036-366344;Summit-366294-366295;Dist-0	inf	+	orf19.3413
Ca21chr6_C_albicans_SC5314	365711	367207	MSPC_Peak_237;ID=orf19.3412;Name=orf19.3412;Peak-366504-368297;Summit-366698-366699;Dist-0	inf	-	orf19.3412
Ca21chr6_C_albicans_SC5314	374033	374308	MSPC_Peak_232;ID=tA(UGC)1;Name=tA(UGC)1;Peak-378751-378823;Summit-374190-374191;Dist--4561	40	+	tA(UGC)1
Ca21chr6_C_albicans_SC5314	378658	378939	MSPC_Peak_227;ID=tA(UGC)1;Name=tA(UGC)1;Peak-378751-378823;Summit-378798-378799;Dist-0	inf	+	tA(UGC)1
Ca21chr6_C_albicans_SC5314	393897	394807	MSPC_Peak_222;ID=orf19.3391;Name=orf19.3391;Peak-393777-394526;Summit-394221-394222;Dist-0	26	+	orf19.3391
Ca21chr6_C_albicans_SC5314	402589	403677	MSPC_Peak_207;ID=orf19.687.1;Name=orf19.687.1;Peak-402823-403696;Summit-402840-402841;Dist-0	139	-	orf19.687.1
Ca21chr6_C_albicans_SC5314	411257	411523	MSPC_Peak_205;ID=orf19.3507;Name=orf19.3507;Peak-418020-418925;Summit-411511-411512;Dist--6509	21	+	orf19.3507
Ca21chr6_C_albicans_SC5314	420871	421231	MSPC_Peak_203;ID=orf19.3505;Name=orf19.3505;Peak-422329-424725;Summit-421034-421035;Dist--1295	70	+	orf19.3505
Ca21chr6_C_albicans_SC5314	421482	421790	MSPC_Peak_201;ID=orf19.3505;Name=orf19.3505;Peak-422329-424725;Summit-421683-421684;Dist--646	88	+	orf19.3505
Ca21chr6_C_albicans_SC5314	425619	425977	MSPC_Peak_199;ID=orf19.3504;Name=orf19.3504;Peak-425041-425969;Summit-425625-425626;Dist-0	19	-	orf19.3504
Ca21chr6_C_albicans_SC5314	430539	431019	MSPC_Peak_196;ID=orf19.3501;Name=orf19.3501;Peak-426543-429683;Summit-430798-430826;Dist--1116	inf	-	orf19.3501
Ca21chr6_C_albicans_SC5314	439142	441118	MSPC_Peak_192;ID=orf19.3496;Name=orf19.3496;Peak-438049-443028;Summit-440968-440969;Dist-0	46	+	orf19.3496
Ca21chr6_C_albicans_SC5314	465294	466066	MSPC_Peak_190;ID=orf19.3465;Name=orf19.3465;Peak-465372-466025;Summit-465540-465541;Dist-0	105	-	orf19.3465
Ca21chr6_C_albicans_SC5314	467687	468207	MSPC_Peak_184;ID=orf19.3465;Name=orf19.3465;Peak-465372-466025;Summit-467766-467767;Dist--1742	99	-	orf19.3465
Ca21chr6_C_albicans_SC5314	483808	484671	MSPC_Peak_181;ID=orf19.3474;Name=orf19.3474;Peak-481371-482963;Summit-484060-484083;Dist--1098	inf	-	orf19.3474
Ca21chr6_C_albicans_SC5314	484967	485357	MSPC_Peak_177;ID=orf19.3475;Name=orf19.3475;Peak-486570-487130;Summit-485110-485111;Dist--1460	245.243	+	orf19.3475
Ca21chr6_C_albicans_SC5314	484967	485357	MSPC_Peak_177;ID=orf19.3475;Name=orf19.3475;Peak-486570-487130;Summit-485190-485191;Dist--1380	245.243	+	orf19.3475
Ca21chr6_C_albicans_SC5314	496193	496979	MSPC_Peak_172;ID=orf19.3481;Name=orf19.3481;Peak-496121-497788;Summit-496561-496562;Dist-0	124	+	orf19.3481
Ca21chr6_C_albicans_SC5314	497237	497684	MSPC_Peak_166;ID=orf19.3481;Name=orf19.3481;Peak-496121-497788;Summit-497399-497400;Dist-0	46	+	orf19.3481
Ca21chr6_C_albicans_SC5314	528076	528477	MSPC_Peak_162;ID=orf19.5528;Name=orf19.5528;Peak-528430-529251;Summit-528430-528431;Dist-0	26	-	orf19.5528
Ca21chr6_C_albicans_SC5314	546251	547158	MSPC_Peak_159;ID=orf19.5536;Name=orf19.5536;Peak-541743-543461;Summit-546954-546977;Dist--3494	inf	-	orf19.5536
Ca21chr6_C_albicans_SC5314	549695	550182	MSPC_Peak_144;ID=orf19.5537;Name=orf19.5537;Peak-547659-548957;Summit-549864-549865;Dist--908	inf	-	orf19.5537
Ca21chr6_C_albicans_SC5314	549695	550182	MSPC_Peak_144;ID=orf19.5537;Name=orf19.5537;Peak-547659-548957;Summit-549896-549900;Dist--940	inf	-	orf19.5537
Ca21chr6_C_albicans_SC5314	550889	551670	MSPC_Peak_141;ID=orf19.5539;Name=orf19.5539;Peak-552719-553561;Summit-551336-551337;Dist--1383	inf	+	orf19.5539
Ca21chr6_C_albicans_SC5314	550889	551670	MSPC_Peak_141;ID=orf19.5539;Name=orf19.5539;Peak-552719-553561;Summit-551360-551365;Dist--1355	inf	+	orf19.5539
Ca21chr6_C_albicans_SC5314	552144	552595	MSPC_Peak_139;ID=orf19.5539;Name=orf19.5539;Peak-552719-553561;Summit-552378-552379;Dist--341	300.604	+	orf19.5539
Ca21chr6_C_albicans_SC5314	552144	552595	MSPC_Peak_139;ID=orf19.5539;Name=orf19.5539;Peak-552719-553561;Summit-552403-552404;Dist--316	300.604	+	orf19.5539
Ca21chr6_C_albicans_SC5314	552144	552595	MSPC_Peak_139;ID=orf19.5539;Name=orf19.5539;Peak-552719-553561;Summit-552445-552446;Dist--274	300.604	+	orf19.5539
Ca21chr6_C_albicans_SC5314	560165	560798	MSPC_Peak_137;ID=orf19.5542;Name=orf19.5542;Peak-558311-559567;Summit-560430-560437;Dist--864	inf	-	orf19.5542
Ca21chr6_C_albicans_SC5314	560165	560798	MSPC_Peak_137;ID=orf19.5542;Name=orf19.5542;Peak-558311-559567;Summit-560471-560472;Dist--905	inf	-	orf19.5542
Ca21chr6_C_albicans_SC5314	614577	614961	MSPC_Peak_135;ID=orf19.5576;Name=orf19.5576;Peak-614547-616211;Summit-614640-614641;Dist-0	31	-	orf19.5576
Ca21chr6_C_albicans_SC5314	615199	616031	MSPC_Peak_131;ID=orf19.5576;Name=orf19.5576;Peak-614547-616211;Summit-615755-615756;Dist-0	72	-	orf19.5576
Ca21chr6_C_albicans_SC5314	633775	634681	MSPC_Peak_128;ID=orf19.5585;Name=orf19.5585;Peak-635336-636592;Summit-634111-634121;Dist--1216	inf	+	orf19.5585
Ca21chr6_C_albicans_SC5314	646645	646879	MSPC_Peak_125;ID=orf19.5589;Name=orf19.5589;Peak-646325-646648;Summit-646773-646774;Dist--126	48	-	orf19.5589
Ca21chr6_C_albicans_SC5314	650005	650791	MSPC_Peak_122;ID=orf19.5592;Name=orf19.5592;Peak-648633-650654;Summit-650256-650257;Dist-0	inf	+	orf19.5592
Ca21chr6_C_albicans_SC5314	650005	650791	MSPC_Peak_122;ID=orf19.5592;Name=orf19.5592;Peak-648633-650654;Summit-650308-650310;Dist-0	inf	+	orf19.5592
Ca21chr6_C_albicans_SC5314	650998	651720	MSPC_Peak_120;ID=orf19.5595;Name=orf19.5595;Peak-652332-653891;Summit-651543-651550;Dist--783	inf	+	orf19.5595
Ca21chr6_C_albicans_SC5314	650998	651720	MSPC_Peak_120;ID=orf19.5595;Name=orf19.5595;Peak-652332-653891;Summit-651590-651591;Dist--742	inf	+	orf19.5595
Ca21chr6_C_albicans_SC5314	652152	654057	MSPC_Peak_115;ID=orf19.5595;Name=orf19.5595;Peak-652332-653891;Summit-652512-652513;Dist-0	151.449	+	orf19.5595
Ca21chr6_C_albicans_SC5314	652152	654057	MSPC_Peak_115;ID=orf19.5595;Name=orf19.5595;Peak-652332-653891;Summit-653845-653846;Dist-0	151.449	+	orf19.5595
Ca21chr6_C_albicans_SC5314	659083	659489	MSPC_Peak_111;ID=orf19.5599;Name=orf19.5599;Peak-659244-661595;Summit-659320-659321;Dist-0	26	-	orf19.5599
Ca21chr6_C_albicans_SC5314	668404	668862	MSPC_Peak_107;ID=orf19.5604;Name=orf19.5604;Peak-666548-668242;Summit-668619-668641;Dist--378	inf	-	orf19.5604
Ca21chr6_C_albicans_SC5314	693350	694583	MSPC_Peak_102;ID=orf19.5619;Name=orf19.5619;Peak-693815-695932;Summit-693483-693484;Dist--332	155.438	+	orf19.5619
Ca21chr6_C_albicans_SC5314	693350	694583	MSPC_Peak_102;ID=orf19.5619;Name=orf19.5619;Peak-693815-695932;Summit-694334-694335;Dist-0	155.438	+	orf19.5619
Ca21chr6_C_albicans_SC5314	694865	695343	MSPC_Peak_97;ID=orf19.5619;Name=orf19.5619;Peak-693815-695932;Summit-694982-694983;Dist-0	54	+	orf19.5619
Ca21chr6_C_albicans_SC5314	695920	696332	MSPC_Peak_81;ID=orf19.5619;Name=orf19.5619;Peak-693815-695932;Summit-695922-695923;Dist-0	14	+	orf19.5619
Ca21chr6_C_albicans_SC5314	697008	697552	MSPC_Peak_79;ID=orf19.5620;Name=orf19.5620;Peak-696408-697337;Summit-697158-697159;Dist-0	17	+	orf19.5620
Ca21chr6_C_albicans_SC5314	700527	701010	MSPC_Peak_78;ID=orf19.5622;Name=orf19.5622;Peak-700362-702416;Summit-700840-700841;Dist-0	78	-	orf19.5622
Ca21chr6_C_albicans_SC5314	707577	708282	MSPC_Peak_76;ID=orf19.5626;Name=orf19.5626;Peak-710237-711466;Summit-708080-708100;Dist--2138	inf	+	orf19.5626
Ca21chr6_C_albicans_SC5314	712630	712906	MSPC_Peak_75;ID=orf19.5627;Name=orf19.5627;Peak-712332-713438;Summit-712666-712667;Dist-0	29	+	orf19.5627
Ca21chr6_C_albicans_SC5314	715714	716067	MSPC_Peak_73;ID=orf19.5701;Name=orf19.5701;Peak-718017-720212;Summit-715720-715721;Dist--2297	20	+	orf19.5701
Ca21chr6_C_albicans_SC5314	746933	747721	MSPC_Peak_71;ID=orf19.5717;Name=orf19.5717;Peak-747133-747480;Summit-747258-747271;Dist-0	inf	-	orf19.5717
Ca21chr6_C_albicans_SC5314	810594	812242	MSPC_Peak_68;ID=orf19.5750;Name=orf19.5750;Peak-810800-812212;Summit-811456-811457;Dist-0	296.161	-	orf19.5750
Ca21chr6_C_albicans_SC5314	810594	812242	MSPC_Peak_68;ID=orf19.5750;Name=orf19.5750;Peak-810800-812212;Summit-811490-811491;Dist-0	296.161	-	orf19.5750
Ca21chr6_C_albicans_SC5314	830935	831997	MSPC_Peak_66;ID=orf19.5758;Name=orf19.5758;Peak-830292-832007;Summit-831578-831579;Dist-0	64	+	orf19.5758
Ca21chr6_C_albicans_SC5314	838211	838619	MSPC_Peak_62;ID=orf19.5760;Name=orf19.5760;Peak-838462-839640;Summit-838576-838577;Dist-0	51	-	orf19.5760
Ca21chr6_C_albicans_SC5314	839228	841058	MSPC_Peak_59;ID=orf19.5760;Name=orf19.5760;Peak-838462-839640;Summit-840561-840574;Dist--922	inf	-	orf19.5760
Ca21chr6_C_albicans_SC5314	843208	843482	MSPC_Peak_57;ID=tA(UGC)2;Name=tA(UGC)2;Peak-843289-843361;Summit-843322-843341;Dist-0	inf	-	tA(UGC)2
Ca21chr6_C_albicans_SC5314	858053	858428	MSPC_Peak_53;ID=orf19.5773;Name=orf19.5773;Peak-857571-859673;Summit-858384-858385;Dist-0	18	+	orf19.5773
Ca21chr6_C_albicans_SC5314	866949	867785	MSPC_Peak_48;ID=orf19.5775;Name=orf19.5775;Peak-863241-864779;Summit-867383-867384;Dist--2605	290.633	-	orf19.5775
Ca21chr6_C_albicans_SC5314	866949	867785	MSPC_Peak_48;ID=orf19.5775;Name=orf19.5775;Peak-863241-864779;Summit-867472-867476;Dist--2694	290.633	-	orf19.5775
Ca21chr6_C_albicans_SC5314	868265	868625	MSPC_Peak_32;ID=orf19.5775;Name=orf19.5775;Peak-863241-864779;Summit-868439-868440;Dist--3661	271	-	orf19.5775
Ca21chr6_C_albicans_SC5314	869027	869352	MSPC_Peak_29;ID=orf19.5775;Name=orf19.5775;Peak-863241-864779;Summit-869196-869200;Dist--4418	inf	-	orf19.5775
Ca21chr6_C_albicans_SC5314	873608	873905	MSPC_Peak_25;ID=orf19.1221;Name=orf19.1221;Peak-876484-877821;Summit-873617-873618;Dist--2867	20	+	orf19.1221
Ca21chr6_C_albicans_SC5314	878213	878479	MSPC_Peak_21;ID=orf19.1220;Name=orf19.1220;Peak-878042-879364;Summit-878426-878427;Dist-0	22	-	orf19.1220
Ca21chr6_C_albicans_SC5314	937548	937912	MSPC_Peak_17;ID=orf19.1083;Name=orf19.1083;Peak-937757-938440;Summit-937849-937850;Dist-0	19	-	orf19.1083
Ca21chr6_C_albicans_SC5314	963043	963307	MSPC_Peak_13;ID=orf19.1093;Name=orf19.1093;Peak-959807-962185;Summit-963159-963160;Dist--975	inf	-	orf19.1093
Ca21chr6_C_albicans_SC5314	963043	963307	MSPC_Peak_13;ID=orf19.1093;Name=orf19.1093;Peak-959807-962185;Summit-963197-963198;Dist--1013	inf	-	orf19.1093
Ca21chr6_C_albicans_SC5314	992938	993196	MSPC_Peak_9;ID=orf19.2129;Name=orf19.2129;Peak-989037-991538;Summit-993094-993095;Dist--1557	164	-	orf19.2129
Ca21chr6_C_albicans_SC5314	1006471	1006860	MSPC_Peak_5;ID=orf19.2138;Name=orf19.2138;Peak-1005464-1008730;Summit-1006498-1006499;Dist-0	26	+	orf19.2138
Ca21chr6_C_albicans_SC5314	1007126	1007378	MSPC_Peak_1;ID=orf19.2138;Name=orf19.2138;Peak-1005464-1008730;Summit-1007223-1007224;Dist-0	27	+	orf19.2138
Ca21chr7_C_albicans_SC5314	1270	1613	MSPC_Peak_947;ID=orf19.7124;Name=orf19.7124;Peak-1246-2040;Summit-1347-1348;Dist-0	41	-	orf19.7124
Ca21chr7_C_albicans_SC5314	2459	2922	MSPC_Peak_942;ID=orf19.7123;Name=orf19.7123;Peak-2278-2769;Summit-2678-2679;Dist-0	49	+	orf19.7123
Ca21chr7_C_albicans_SC5314	9810	10360	MSPC_Peak_935;ID=orf19.7114;Name=orf19.7114;Peak-10024-13080;Summit-10288-10289;Dist-0	15	-	orf19.7114
Ca21chr7_C_albicans_SC5314	15614	16001	MSPC_Peak_930;ID=orf19.7112;Name=orf19.7112;Peak-14047-15825;Summit-15632-15633;Dist-0	32	+	orf19.7112
Ca21chr7_C_albicans_SC5314	42743	43180	MSPC_Peak_926;ID=orf19.7094;Name=orf19.7094;Peak-41587-43167;Summit-43090-43091;Dist-0	69	+	orf19.7094
Ca21chr7_C_albicans_SC5314	57323	57864	MSPC_Peak_923;ID=orf19.7085;Name=orf19.7085;Peak-56058-57377;Summit-57594-57606;Dist--218	inf	-	orf19.7085
Ca21chr7_C_albicans_SC5314	59116	60069	MSPC_Peak_918;ID=orf19.7084;Name=orf19.7084;Peak-59071-60084;Summit-59891-59892;Dist-0	46	+	orf19.7084
Ca21chr7_C_albicans_SC5314	68841	69490	MSPC_Peak_910;ID=orf19.7079;Name=orf19.7079;Peak-65303-68746;Summit-69043-69044;Dist--298	81.711	-	orf19.7079
Ca21chr7_C_albicans_SC5314	68841	69490	MSPC_Peak_910;ID=orf19.7078;Name=orf19.7078;Peak-69078-69539;Summit-69168-69169;Dist-0	81.711	-	orf19.7078
Ca21chr7_C_albicans_SC5314	70203	70767	MSPC_Peak_906;ID=orf19.7077;Name=orf19.7077;Peak-70601-72361;Summit-70439-70446;Dist--156	inf	+	orf19.7077
Ca21chr7_C_albicans_SC5314	72330	72806	MSPC_Peak_892;ID=orf19.7076;Name=orf19.7076;Peak-72658-74332;Summit-72795-72796;Dist-0	15	-	orf19.7076
Ca21chr7_C_albicans_SC5314	82053	82632	MSPC_Peak_889;ID=orf19.7068;Name=orf19.7068;Peak-82584-83879;Summit-82326-82329;Dist--256	inf	+	orf19.7068
Ca21chr7_C_albicans_SC5314	83394	83784	MSPC_Peak_886;ID=orf19.7068;Name=orf19.7068;Peak-82584-83879;Summit-83698-83699;Dist-0	26	+	orf19.7068
Ca21chr7_C_albicans_SC5314	109662	112405	MSPC_Peak_883;ID=orf19.7055;Name=orf19.7055;Peak-106320-106646;Summit-109795-109796;Dist--3150	inf	-	orf19.7055
Ca21chr7_C_albicans_SC5314	109662	112405	MSPC_Peak_883;ID=orf19.7054;Name=orf19.7054;Peak-114110-114475;Summit-110473-110474;Dist--3637	inf	+	orf19.7054
Ca21chr7_C_albicans_SC5314	109662	112405	MSPC_Peak_883;ID=orf19.7054;Name=orf19.7054;Peak-114110-114475;Summit-111749-111755;Dist--2356	inf	+	orf19.7054
Ca21chr7_C_albicans_SC5314	113920	115133	MSPC_Peak_880;ID=orf19.7054;Name=orf19.7054;Peak-114110-114475;Summit-114097-114098;Dist--13	inf	+	orf19.7054
Ca21chr7_C_albicans_SC5314	113920	115133	MSPC_Peak_880;ID=orf19.7054;Name=orf19.7054;Peak-114110-114475;Summit-114130-114144;Dist-0	inf	+	orf19.7054
Ca21chr7_C_albicans_SC5314	115936	116262	MSPC_Peak_877;ID=orf19.7053;Name=orf19.7053;Peak-115894-117909;Summit-116161-116162;Dist-0	54	+	orf19.7053
Ca21chr7_C_albicans_SC5314	118130	120170	MSPC_Peak_874;ID=orf19.7051;Name=orf19.7051;Peak-126561-127202;Summit-119228-119230;Dist--7332	inf	+	orf19.7051
Ca21chr7_C_albicans_SC5314	118130	120170	MSPC_Peak_874;ID=orf19.7051;Name=orf19.7051;Peak-126561-127202;Summit-119765-119766;Dist--6796	inf	+	orf19.7051
Ca21chr7_C_albicans_SC5314	122216	122809	MSPC_Peak_870;ID=orf19.7051;Name=orf19.7051;Peak-126561-127202;Summit-122470-122471;Dist--4091	240.793	+	orf19.7051
Ca21chr7_C_albicans_SC5314	122216	122809	MSPC_Peak_870;ID=orf19.7051;Name=orf19.7051;Peak-126561-127202;Summit-122655-122656;Dist--3906	240.793	+	orf19.7051
Ca21chr7_C_albicans_SC5314	122216	122809	MSPC_Peak_870;ID=orf19.7051;Name=orf19.7051;Peak-126561-127202;Summit-122699-122700;Dist--3862	240.793	+	orf19.7051
Ca21chr7_C_albicans_SC5314	129336	129920	MSPC_Peak_863;ID=orf19.7048.1;Name=orf19.7048.1;Peak-131585-131860;Summit-129637-129638;Dist--1948	40	+	orf19.7048.1
Ca21chr7_C_albicans_SC5314	131654	132422	MSPC_Peak_856;ID=orf19.7047;Name=orf19.7047;Peak-132567-134273;Summit-132200-132201;Dist--367	inf	+	orf19.7047
Ca21chr7_C_albicans_SC5314	131654	132422	MSPC_Peak_856;ID=orf19.7047;Name=orf19.7047;Peak-132567-134273;Summit-132269-132270;Dist--298	inf	+	orf19.7047
Ca21chr7_C_albicans_SC5314	135738	136380	MSPC_Peak_847;ID=orf19.7044;Name=orf19.7044;Peak-137282-143053;Summit-136068-136069;Dist--1214	64.809	+	orf19.7044
Ca21chr7_C_albicans_SC5314	135738	136380	MSPC_Peak_847;ID=orf19.7044;Name=orf19.7044;Peak-137282-143053;Summit-136175-136176;Dist--1107	64.809	+	orf19.7044
Ca21chr7_C_albicans_SC5314	143595	144124	MSPC_Peak_840;ID=orf19.7043.1;Name=orf19.7043.1;Peak-143529-143912;Summit-143903-143904;Dist-0	177	+	orf19.7043.1
Ca21chr7_C_albicans_SC5314	184715	185370	MSPC_Peak_833;ID=orf19.7024;Name=orf19.7024;Peak-189687-189995;Summit-184995-184996;Dist--4692	152.446	+	orf19.7024
Ca21chr7_C_albicans_SC5314	184715	185370	MSPC_Peak_833;ID=orf19.7024;Name=orf19.7024;Peak-189687-189995;Summit-185025-185026;Dist--4662	152.446	+	orf19.7024
Ca21chr7_C_albicans_SC5314	194702	195619	MSPC_Peak_825;ID=orf19.7021;Name=orf19.7021;Peak-195079-197781;Summit-195605-195606;Dist-0	23	+	orf19.7021
Ca21chr7_C_albicans_SC5314	197566	198014	MSPC_Peak_813;ID=orf19.7021;Name=orf19.7021;Peak-195079-197781;Summit-197690-197691;Dist-0	156	+	orf19.7021
Ca21chr7_C_albicans_SC5314	202698	203401	MSPC_Peak_750;ID=orf19.7018;Name=orf19.7018;Peak-202217-203082;Summit-203065-203066;Dist-0	227.275	+	orf19.7018
Ca21chr7_C_albicans_SC5314	202698	203401	MSPC_Peak_750;ID=orf19.7016;Name=orf19.7016;Peak-209134-211122;Summit-203101-203102;Dist--6033	227.275	+	orf19.7016
Ca21chr7_C_albicans_SC5314	203896	205204	MSPC_Peak_746;ID=orf19.7016;Name=orf19.7016;Peak-209134-211122;Summit-204413-204414;Dist--4721	inf	+	orf19.7016
Ca21chr7_C_albicans_SC5314	203896	205204	MSPC_Peak_746;ID=orf19.7016;Name=orf19.7016;Peak-209134-211122;Summit-204437-204438;Dist--4697	inf	+	orf19.7016
Ca21chr7_C_albicans_SC5314	203896	205204	MSPC_Peak_746;ID=orf19.7016;Name=orf19.7016;Peak-209134-211122;Summit-204465-204466;Dist--4669	inf	+	orf19.7016
Ca21chr7_C_albicans_SC5314	206275	206894	MSPC_Peak_741;ID=orf19.7017;Name=orf19.7017;Peak-205033-206040;Summit-206492-206493;Dist--453	inf	-	orf19.7017
Ca21chr7_C_albicans_SC5314	206275	206894	MSPC_Peak_741;ID=orf19.7017;Name=orf19.7017;Peak-205033-206040;Summit-206540-206551;Dist--501	inf	-	orf19.7017
Ca21chr7_C_albicans_SC5314	207246	208319	MSPC_Peak_736;ID=orf19.7016;Name=orf19.7016;Peak-209134-211122;Summit-207917-207926;Dist--1209	inf	+	orf19.7016
Ca21chr7_C_albicans_SC5314	207246	208319	MSPC_Peak_736;ID=orf19.7016;Name=orf19.7016;Peak-209134-211122;Summit-207948-207949;Dist--1186	inf	+	orf19.7016
Ca21chr7_C_albicans_SC5314	211779	212280	MSPC_Peak_729;ID=orf19.7015;Name=orf19.7015;Peak-211801-212739;Summit-212081-212082;Dist-0	25.199	+	orf19.7015
Ca21chr7_C_albicans_SC5314	211779	212280	MSPC_Peak_729;ID=orf19.7015;Name=orf19.7015;Peak-211801-212739;Summit-212279-212280;Dist-0	25.199	+	orf19.7015
Ca21chr7_C_albicans_SC5314	234566	235824	MSPC_Peak_724;ID=orf19.6896;Name=orf19.6896;Peak-230874-232412;Summit-235288-235297;Dist--2877	inf	-	orf19.6896
Ca21chr7_C_albicans_SC5314	236128	236478	MSPC_Peak_719;ID=orf19.6897;Name=orf19.6897;Peak-236122-236562;Summit-236321-236330;Dist-0	inf	-	orf19.6897
Ca21chr7_C_albicans_SC5314	255158	256661	MSPC_Peak_714;ID=orf19.6905;Name=orf19.6905;Peak-255375-256808;Summit-255432-255433;Dist-0	62	-	orf19.6905
Ca21chr7_C_albicans_SC5314	301191	301442	MSPC_Peak_709;ID=orf19.6585;Name=orf19.6585;Peak-302677-303045;Summit-301290-301303;Dist--1375	inf	+	orf19.6585
Ca21chr7_C_albicans_SC5314	303059	303436	MSPC_Peak_704;ID=orf19.6584;Name=orf19.6584;Peak-303153-305372;Summit-303394-303395;Dist-0	13	-	orf19.6584
Ca21chr7_C_albicans_SC5314	304243	304936	MSPC_Peak_699;ID=orf19.6584;Name=orf19.6584;Peak-303153-305372;Summit-304247-304248;Dist-0	24	-	orf19.6584
Ca21chr7_C_albicans_SC5314	312983	313723	MSPC_Peak_694;ID=orf19.6580;Name=orf19.6580;Peak-312572-313264;Summit-313129-313130;Dist-0	114.568	+	orf19.6580
Ca21chr7_C_albicans_SC5314	312983	313723	MSPC_Peak_694;ID=orf19.6579;Name=orf19.6579;Peak-313807-315117;Summit-313610-313611;Dist--197	114.568	+	orf19.6579
Ca21chr7_C_albicans_SC5314	317329	317564	MSPC_Peak_689;ID=orf19.6578;Name=orf19.6578;Peak-317086-318729;Summit-317525-317526;Dist-0	26	+	orf19.6578
Ca21chr7_C_albicans_SC5314	318167	318710	MSPC_Peak_685;ID=orf19.6578;Name=orf19.6578;Peak-317086-318729;Summit-318589-318590;Dist-0	28	+	orf19.6578
Ca21chr7_C_albicans_SC5314	328077	328664	MSPC_Peak_678;ID=orf19.6573;Name=orf19.6573;Peak-329717-336475;Summit-328187-328193;Dist--1525	174.389	+	orf19.6573
Ca21chr7_C_albicans_SC5314	331571	331834	MSPC_Peak_626;ID=orf19.6573;Name=orf19.6573;Peak-329717-336475;Summit-331691-331692;Dist-0	57	+	orf19.6573
Ca21chr7_C_albicans_SC5314	352710	352967	MSPC_Peak_623;ID=orf19.6561;Name=orf19.6561;Peak-352680-354113;Summit-352909-352910;Dist-0	28	+	orf19.6561
Ca21chr7_C_albicans_SC5314	353938	354292	MSPC_Peak_617;ID=orf19.6561;Name=orf19.6561;Peak-352680-354113;Summit-353950-353951;Dist-0	25	+	orf19.6561
Ca21chr7_C_albicans_SC5314	355004	355466	MSPC_Peak_611;ID=orf19.6559;Name=orf19.6559;Peak-354544-356141;Summit-355336-355337;Dist-0	85	+	orf19.6559
Ca21chr7_C_albicans_SC5314	361957	362363	MSPC_Peak_607;ID=orf19.6558;Name=orf19.6558;Peak-356177-358624;Summit-362127-362144;Dist--3504	inf	-	orf19.6558
Ca21chr7_C_albicans_SC5314	388127	388841	MSPC_Peak_603;ID=orf19.6540;Name=orf19.6540;Peak-385960-388800;Summit-388155-388156;Dist-0	39.02	-	orf19.6540
Ca21chr7_C_albicans_SC5314	388127	388841	MSPC_Peak_603;ID=orf19.6540;Name=orf19.6540;Peak-385960-388800;Summit-388337-388338;Dist-0	39.02	-	orf19.6540
Ca21chr7_C_albicans_SC5314	444939	445406	MSPC_Peak_599;ID=orf19.6518;Name=orf19.6518;Peak-435303-437288;Summit-445156-445179;Dist--7869	inf	-	orf19.6518
Ca21chr7_C_albicans_SC5314	445712	446859	MSPC_Peak_595;ID=orf19.6518;Name=orf19.6518;Peak-435303-437288;Summit-446080-446096;Dist--8793	inf	-	orf19.6518
Ca21chr7_C_albicans_SC5314	447866	448933	MSPC_Peak_592;ID=orf19.6511;Name=orf19.6511;Peak-458226-460724;Summit-448492-448511;Dist--9716	inf	+	orf19.6511
Ca21chr7_C_albicans_SC5314	449292	449772	MSPC_Peak_589;ID=orf19.6511;Name=orf19.6511;Peak-458226-460724;Summit-449472-449473;Dist--8754	inf	+	orf19.6511
Ca21chr7_C_albicans_SC5314	449292	449772	MSPC_Peak_589;ID=orf19.6511;Name=orf19.6511;Peak-458226-460724;Summit-449517-449519;Dist--8708	inf	+	orf19.6511
Ca21chr7_C_albicans_SC5314	450617	451751	MSPC_Peak_585;ID=orf19.6514;Name=orf19.6514;Peak-449876-450910;Summit-451514-451521;Dist--605	inf	-	orf19.6514
Ca21chr7_C_albicans_SC5314	453260	454288	MSPC_Peak_582;ID=orf19.6514;Name=orf19.6514;Peak-449876-450910;Summit-453517-453518;Dist--2608	inf	-	orf19.6514
Ca21chr7_C_albicans_SC5314	453260	454288	MSPC_Peak_582;ID=orf19.6514;Name=orf19.6514;Peak-449876-450910;Summit-453878-453899;Dist--2969	inf	-	orf19.6514
Ca21chr7_C_albicans_SC5314	518923	519451	MSPC_Peak_576;ID=orf19.6472;Name=orf19.6472;Peak-519137-519625;Summit-519173-519174;Dist-0	185	-	orf19.6472
Ca21chr7_C_albicans_SC5314	538223	538645	MSPC_Peak_567;ID=orf19.6458.1;Name=orf19.6458.1;Peak-540454-540928;Summit-538359-538360;Dist--2095	31	+	orf19.6458.1
Ca21chr7_C_albicans_SC5314	544875	545602	MSPC_Peak_562;ID=orf19.6456;Name=orf19.6456;Peak-545768-547444;Summit-545398-545417;Dist--352	inf	+	orf19.6456
Ca21chr7_C_albicans_SC5314	544875	545602	MSPC_Peak_562;ID=orf19.6456;Name=orf19.6456;Peak-545768-547444;Summit-545442-545443;Dist--326	inf	+	orf19.6456
Ca21chr7_C_albicans_SC5314	580889	581269	MSPC_Peak_517;ID=orf19.5191;Name=orf19.5191;Peak-585462-587000;Summit-581040-581042;Dist--4421	inf	+	orf19.5191
Ca21chr7_C_albicans_SC5314	581575	581992	MSPC_Peak_514;ID=orf19.5191;Name=orf19.5191;Peak-585462-587000;Summit-581800-581810;Dist--3653	inf	+	orf19.5191
Ca21chr7_C_albicans_SC5314	582481	583140	MSPC_Peak_508;ID=orf19.5191;Name=orf19.5191;Peak-585462-587000;Summit-583064-583070;Dist--2393	inf	+	orf19.5191
Ca21chr7_C_albicans_SC5314	584288	584548	MSPC_Peak_502;ID=orf19.5191;Name=orf19.5191;Peak-585462-587000;Summit-584361-584362;Dist--1101	24	+	orf19.5191
Ca21chr7_C_albicans_SC5314	584850	585339	MSPC_Peak_498;ID=orf19.5191;Name=orf19.5191;Peak-585462-587000;Summit-585054-585070;Dist--393	inf	+	orf19.5191
Ca21chr7_C_albicans_SC5314	597651	597910	MSPC_Peak_493;ID=orf19.5184;Name=orf19.5184;Peak-596459-597940;Summit-597728-597729;Dist-0	38	+	orf19.5184
Ca21chr7_C_albicans_SC5314	612462	613081	MSPC_Peak_488;ID=orf19.5178;Name=orf19.5178;Peak-612167-613720;Summit-612473-612474;Dist-0	17	-	orf19.5178
Ca21chr7_C_albicans_SC5314	628741	629091	MSPC_Peak_483;ID=orf19.5170;Name=orf19.5170;Peak-629811-632726;Summit-629047-629048;Dist--764	32	+	orf19.5170
Ca21chr7_C_albicans_SC5314	670752	671257	MSPC_Peak_477;ID=orf19.5147;Name=orf19.5147;Peak-669600-671519;Summit-671210-671211;Dist-0	20	+	orf19.5147
Ca21chr7_C_albicans_SC5314	692934	694162	MSPC_Peak_471;ID=orf19.5137;Name=orf19.5137;Peak-692252-692629;Summit-693232-693233;Dist--604	239.511	-	orf19.5137
Ca21chr7_C_albicans_SC5314	692934	694162	MSPC_Peak_471;ID=orf19.5137;Name=orf19.5137;Peak-692252-692629;Summit-693339-693340;Dist--711	239.511	-	orf19.5137
Ca21chr7_C_albicans_SC5314	692934	694162	MSPC_Peak_471;ID=orf19.5137;Name=orf19.5137;Peak-692252-692629;Summit-693398-693399;Dist--770	239.511	-	orf19.5137
Ca21chr7_C_albicans_SC5314	692934	694162	MSPC_Peak_471;ID=orf19.5136;Name=orf19.5136;Peak-693471-694157;Summit-693789-693790;Dist-0	239.511	-	orf19.5136
Ca21chr7_C_albicans_SC5314	706097	707209	MSPC_Peak_465;ID=orf19.5130;Name=orf19.5130;Peak-705627-707309;Summit-706483-706484;Dist-0	73	-	orf19.5130
Ca21chr7_C_albicans_SC5314	711124	712055	MSPC_Peak_459;ID=orf19.5126;Name=orf19.5126;Peak-710719-711912;Summit-711658-711659;Dist-0	67	+	orf19.5126
Ca21chr7_C_albicans_SC5314	712447	713148	MSPC_Peak_454;ID=orf19.5129;Name=orf19.5129;Peak-708478-709164;Summit-712553-712554;Dist--3390	32	-	orf19.5129
Ca21chr7_C_albicans_SC5314	729163	729412	MSPC_Peak_449;ID=orf19.1345;Name=orf19.1345;Peak-727502-728884;Summit-729163-729164;Dist--280	14	-	orf19.1345
Ca21chr7_C_albicans_SC5314	752815	753128	MSPC_Peak_443;ID=orf19.1334;Name=orf19.1334;Peak-749305-751269;Summit-752948-752949;Dist--1680	150.452	-	orf19.1334
Ca21chr7_C_albicans_SC5314	752815	753128	MSPC_Peak_443;ID=orf19.1334;Name=orf19.1334;Peak-749305-751269;Summit-752980-752981;Dist--1712	150.452	-	orf19.1334
Ca21chr7_C_albicans_SC5314	766934	769136	MSPC_Peak_424;ID=orf19.6705;Name=orf19.6705;Peak-771047-774184;Summit-768732-768739;Dist--2309	inf	+	orf19.6705
Ca21chr7_C_albicans_SC5314	770659	771032	MSPC_Peak_421;ID=orf19.6705;Name=orf19.6705;Peak-771047-774184;Summit-770999-771000;Dist--48	24	+	orf19.6705
Ca21chr7_C_albicans_SC5314	771082	771443	MSPC_Peak_417;ID=orf19.6705;Name=orf19.6705;Peak-771047-774184;Summit-771262-771263;Dist-0	14	+	orf19.6705
Ca21chr7_C_albicans_SC5314	796903	797335	MSPC_Peak_414;ID=orf19.6691;Name=orf19.6691;Peak-796834-798693;Summit-797158-797159;Dist-0	24	-	orf19.6691
Ca21chr7_C_albicans_SC5314	802825	803086	MSPC_Peak_410;ID=orf19.6693;Name=orf19.6693;Peak-802950-806381;Summit-802968-802969;Dist-0	68	-	orf19.6693
Ca21chr7_C_albicans_SC5314	805009	805745	MSPC_Peak_406;ID=orf19.6693;Name=orf19.6693;Peak-802950-806381;Summit-805108-805109;Dist-0	57	-	orf19.6693
Ca21chr7_C_albicans_SC5314	812974	813688	MSPC_Peak_400;ID=orf19.6701;Name=orf19.6701;Peak-812940-815015;Summit-813535-813536;Dist-0	75	-	orf19.6701
Ca21chr7_C_albicans_SC5314	865785	866100	MSPC_Peak_390;ID=tL(UAA)5;Name=tL(UAA)5;Peak-865906-866021;Summit-865943-865955;Dist-0	inf	-	tL(UAA)5
Ca21chr7_C_albicans_SC5314	891991	892323	MSPC_Peak_384;ID=orf19.7161;Name=orf19.7161;Peak-892132-892977;Summit-892158-892159;Dist-0	55	-	orf19.7161
Ca21chr7_C_albicans_SC5314	907633	908337	MSPC_Peak_377;ID=orf19.7152;Name=orf19.7152;Peak-907588-908685;Summit-907845-907846;Dist-0	127.522	-	orf19.7152
Ca21chr7_C_albicans_SC5314	907633	908337	MSPC_Peak_377;ID=orf19.7152;Name=orf19.7152;Peak-907588-908685;Summit-907871-907872;Dist-0	127.522	-	orf19.7152
Ca21chr7_C_albicans_SC5314	908935	910657	MSPC_Peak_370;ID=orf19.7152;Name=orf19.7152;Peak-907588-908685;Summit-909198-909215;Dist--514	inf	-	orf19.7152
Ca21chr7_C_albicans_SC5314	908935	910657	MSPC_Peak_370;ID=orf19.7152;Name=orf19.7152;Peak-907588-908685;Summit-910178-910179;Dist--1494	inf	-	orf19.7152
Ca21chr7_C_albicans_SC5314	911074	911455	MSPC_Peak_367;ID=orf19.7152;Name=orf19.7152;Peak-907588-908685;Summit-911234-911243;Dist--2550	inf	-	orf19.7152
Ca21chr7_C_albicans_SC5314	911905	912379	MSPC_Peak_360;ID=orf19.7151;Name=orf19.7151;Peak-915533-915967;Summit-912167-912182;Dist--3352	inf	+	orf19.7151
Ca21chr7_C_albicans_SC5314	914088	914393	MSPC_Peak_353;ID=orf19.7151;Name=orf19.7151;Peak-915533-915967;Summit-914285-914286;Dist--1248	68	+	orf19.7151
Ca21chr7_C_albicans_SC5314	917038	917345	MSPC_Peak_347;ID=orf19.7150;Name=orf19.7150;Peak-918848-919780;Summit-917187-917198;Dist--1651	inf	+	orf19.7150
Ca21chr7_C_albicans_SC5314	917038	917345	MSPC_Peak_347;ID=orf19.7150;Name=orf19.7150;Peak-918848-919780;Summit-917225-917226;Dist--1623	inf	+	orf19.7150
Ca21chr7_C_albicans_SC5314	917788	918198	MSPC_Peak_321;ID=orf19.7150;Name=orf19.7150;Peak-918848-919780;Summit-917963-917984;Dist--865	inf	+	orf19.7150
Ca21chr7_C_albicans_SC5314	943158	943577	MSPC_Peak_314;ID=orf19.7127;Name=orf19.7127;Peak-942861-943388;Summit-943241-943242;Dist-0	30	-	orf19.7127
Ca21chr7_C_albicans_SC5314	946023	946541	MSPC_Peak_298;ID=orf19.7127;Name=orf19.7127;Peak-942861-943388;Summit-946166-946167;Dist--2779	145.466	-	orf19.7127
Ca21chr7_C_albicans_SC5314	946023	946541	MSPC_Peak_298;ID=orf19.7127;Name=orf19.7127;Peak-942861-943388;Summit-946239-946240;Dist--2852	145.466	-	orf19.7127
Ca21chrR_C_albicans_SC5314	256	1131	MSPC_Peak_1058;ID=orf19.7544;Name=orf19.7544;Peak-9111-9863;Summit-620-621;Dist--8491	277.19	+	orf19.7544
Ca21chrR_C_albicans_SC5314	256	1131	MSPC_Peak_1058;ID=orf19.7544;Name=orf19.7544;Peak-9111-9863;Summit-645-646;Dist--8466	277.19	+	orf19.7544
Ca21chrR_C_albicans_SC5314	7649	8050	MSPC_Peak_1054;ID=orf19.7545;Name=orf19.7545;Peak-4884-6890;Summit-7818-7819;Dist--929	107	-	orf19.7545
Ca21chrR_C_albicans_SC5314	8755	9545	MSPC_Peak_1049;ID=orf19.7544;Name=orf19.7544;Peak-9111-9863;Summit-8929-8948;Dist--164	inf	+	orf19.7544
Ca21chrR_C_albicans_SC5314	25090	25791	MSPC_Peak_1045;ID=orf19.7529;Name=orf19.7529;Peak-25279-27540;Summit-25546-25547;Dist-0	58	-	orf19.7529
Ca21chrR_C_albicans_SC5314	62892	63637	MSPC_Peak_1042;ID=orf19.7510;Name=orf19.7510;Peak-63737-67375;Summit-63334-63346;Dist--392	106.599	+	orf19.7510
Ca21chrR_C_albicans_SC5314	66930	67364	MSPC_Peak_1037;ID=orf19.7510;Name=orf19.7510;Peak-63737-67375;Summit-67081-67082;Dist-0	31	+	orf19.7510
Ca21chrR_C_albicans_SC5314	72154	72409	MSPC_Peak_1034;ID=orf19.7504;Name=orf19.7504;Peak-72120-73049;Summit-72348-72349;Dist-0	33	+	orf19.7504
Ca21chrR_C_albicans_SC5314	75307	76707	MSPC_Peak_1031;ID=orf19.7502;Name=orf19.7502;Peak-75931-76707;Summit-75962-75963;Dist-0	88	-	orf19.7502
Ca21chrR_C_albicans_SC5314	88740	89371	MSPC_Peak_1028;ID=orf19.7499.1;Name=orf19.7499.1;Peak-86896-87087;Summit-89280-89281;Dist--2194	36	-	orf19.7499.1
Ca21chrR_C_albicans_SC5314	91861	92199	MSPC_Peak_1024;ID=orf19.7498;Name=orf19.7498;Peak-89454-91784;Summit-91991-92009;Dist--208	inf	-	orf19.7498
Ca21chrR_C_albicans_SC5314	108552	109017	MSPC_Peak_1020;ID=orf19.7489;Name=orf19.7489;Peak-108226-112632;Summit-108589-108590;Dist-0	32	-	orf19.7489
Ca21chrR_C_albicans_SC5314	116813	117351	MSPC_Peak_1015;ID=orf19.7487;Name=orf19.7487;Peak-116823-118079;Summit-116960-116961;Dist-0	63	+	orf19.7487
Ca21chrR_C_albicans_SC5314	120476	120874	MSPC_Peak_1012;ID=orf19.7488;Name=orf19.7488;Peak-115609-116160;Summit-120593-120594;Dist--4434	154.171	-	orf19.7488
Ca21chrR_C_albicans_SC5314	120476	120874	MSPC_Peak_1012;ID=orf19.7488;Name=orf19.7488;Peak-115609-116160;Summit-120648-120649;Dist--4489	154.171	-	orf19.7488
Ca21chrR_C_albicans_SC5314	120476	120874	MSPC_Peak_1012;ID=SNRNAU5;Name=SNRNAU5;Peak-120706-120840;Summit-120713-120714;Dist-0	154.171	-	SNRNAU5
Ca21chrR_C_albicans_SC5314	127055	128215	MSPC_Peak_1004;ID=orf19.7481;Name=orf19.7481;Peak-127176-128189;Summit-127477-127478;Dist-0	97.636	-	orf19.7481
Ca21chrR_C_albicans_SC5314	127055	128215	MSPC_Peak_1004;ID=orf19.7481;Name=orf19.7481;Peak-127176-128189;Summit-127934-127935;Dist-0	97.636	-	orf19.7481
Ca21chrR_C_albicans_SC5314	153433	153722	MSPC_Peak_1000;ID=orf19.7468;Name=orf19.7468;Peak-152187-153800;Summit-153544-153545;Dist-0	53	+	orf19.7468
Ca21chrR_C_albicans_SC5314	161112	162232	MSPC_Peak_997;ID=orf19.7466;Name=orf19.7466;Peak-155204-162019;Summit-161611-161612;Dist-0	130	+	orf19.7466
Ca21chrR_C_albicans_SC5314	172278	172686	MSPC_Peak_995;ID=tT(AGU)3;Name=tT(AGU)3;Peak-172440-172512;Summit-172466-172487;Dist-0	inf	-	tT(AGU)3
Ca21chrR_C_albicans_SC5314	182061	183412	MSPC_Peak_993;ID=orf19.3278;Name=orf19.3278;Peak-182262-184247;Summit-182530-182531;Dist-0	81	-	orf19.3278
Ca21chrR_C_albicans_SC5314	183821	184317	MSPC_Peak_990;ID=orf19.3278;Name=orf19.3278;Peak-182262-184247;Summit-183827-183828;Dist-0	30.127	-	orf19.3278
Ca21chrR_C_albicans_SC5314	183821	184317	MSPC_Peak_990;ID=orf19.3278;Name=orf19.3278;Peak-182262-184247;Summit-183956-183957;Dist-0	30.127	-	orf19.3278
Ca21chrR_C_albicans_SC5314	185270	186993	MSPC_Peak_988;ID=orf19.3277;Name=orf19.3277;Peak-185406-185744;Summit-185722-185740;Dist-0	inf	-	orf19.3277
Ca21chrR_C_albicans_SC5314	197784	198437	MSPC_Peak_986;ID=orf19.3268;Name=orf19.3268;Peak-197965-198468;Summit-198005-198006;Dist-0	123	-	orf19.3268
Ca21chrR_C_albicans_SC5314	206322	207002	MSPC_Peak_983;ID=orf19.3264.1;Name=orf19.3264.1;Peak-206338-206502;Summit-206477-206478;Dist-0	145	+	orf19.3264.1
Ca21chrR_C_albicans_SC5314	210977	215413	MSPC_Peak_981;ID=orf19.3261;Name=orf19.3261;Peak-215629-216156;Summit-214696-214700;Dist--930	inf	+	orf19.3261
Ca21chrR_C_albicans_SC5314	222871	223109	MSPC_Peak_979;ID=orf19.3256;Name=orf19.3256;Peak-221882-226003;Summit-223025-223026;Dist-0	38	-	orf19.3256
Ca21chrR_C_albicans_SC5314	224741	224992	MSPC_Peak_976;ID=orf19.3256;Name=orf19.3256;Peak-221882-226003;Summit-224875-224876;Dist-0	57	-	orf19.3256
Ca21chrR_C_albicans_SC5314	226618	226945	MSPC_Peak_974;ID=orf19.3256;Name=orf19.3256;Peak-221882-226003;Summit-226717-226718;Dist--715	68.784	-	orf19.3256
Ca21chrR_C_albicans_SC5314	226618	226945	MSPC_Peak_974;ID=orf19.3255;Name=orf19.3255;Peak-227661-228041;Summit-226836-226837;Dist--825	68.784	+	orf19.3255
Ca21chrR_C_albicans_SC5314	312660	313187	MSPC_Peak_972;ID=orf19.3223;Name=orf19.3223;Peak-312004-313144;Summit-312965-312966;Dist-0	93	+	orf19.3223
Ca21chrR_C_albicans_SC5314	331204	331446	MSPC_Peak_968;ID=orf19.2524;Name=orf19.2524;Peak-330757-331485;Summit-331291-331292;Dist-0	20	+	orf19.2524
Ca21chrR_C_albicans_SC5314	339386	339687	MSPC_Peak_963;ID=tL(UAA)2;Name=tL(UAA)2;Peak-339497-339612;Summit-339534-339546;Dist-0	inf	-	tL(UAA)2
Ca21chrR_C_albicans_SC5314	343969	344470	MSPC_Peak_959;ID=orf19.2532;Name=orf19.2532;Peak-342526-344253;Summit-344189-344190;Dist-0	191	+	orf19.2532
Ca21chrR_C_albicans_SC5314	368227	369869	MSPC_Peak_955;ID=orf19.2551;Name=orf19.2551;Peak-368753-371056;Summit-369854-369855;Dist-0	18	-	orf19.2551
Ca21chrR_C_albicans_SC5314	370624	371055	MSPC_Peak_950;ID=orf19.2551;Name=orf19.2551;Peak-368753-371056;Summit-370660-370661;Dist-0	41	-	orf19.2551
Ca21chrR_C_albicans_SC5314	380647	381690	MSPC_Peak_944;ID=orf19.2559;Name=orf19.2559;Peak-380833-383139;Summit-380952-380953;Dist-0	79	-	orf19.2559
Ca21chrR_C_albicans_SC5314	381952	383229	MSPC_Peak_939;ID=orf19.2559;Name=orf19.2559;Peak-380833-383139;Summit-382967-382968;Dist-0	71	-	orf19.2559
Ca21chrR_C_albicans_SC5314	384204	386644	MSPC_Peak_934;ID=orf19.2560;Name=orf19.2560;Peak-384289-387582;Summit-385014-385015;Dist-0	71	-	orf19.2560
Ca21chrR_C_albicans_SC5314	398593	399486	MSPC_Peak_929;ID=orf19.2573;Name=orf19.2573;Peak-398692-400470;Summit-398723-398724;Dist-0	88	-	orf19.2573
Ca21chrR_C_albicans_SC5314	403581	403975	MSPC_Peak_925;ID=orf19.2574;Name=orf19.2574;Peak-400733-403453;Summit-403855-403856;Dist--403	50	-	orf19.2574
Ca21chrR_C_albicans_SC5314	454764	455007	MSPC_Peak_920;ID=orf19.2608;Name=orf19.2608;Peak-454023-455033;Summit-454776-454777;Dist-0	24	-	orf19.2608
Ca21chrR_C_albicans_SC5314	456458	456721	MSPC_Peak_916;ID=tL(AAG)1;Name=tL(AAG)1;Peak-456557-456677;Summit-456612-456613;Dist-0	inf	+	tL(AAG)1
Ca21chrR_C_albicans_SC5314	477991	478217	MSPC_Peak_912;ID=orf19.2619;Name=orf19.2619;Peak-478042-479430;Summit-478162-478163;Dist-0	39	+	orf19.2619
Ca21chrR_C_albicans_SC5314	479611	479974	MSPC_Peak_908;ID=orf19.3753;Name=orf19.3753;Peak-479692-482445;Summit-479970-479971;Dist-0	13	-	orf19.3753
Ca21chrR_C_albicans_SC5314	480388	481623	MSPC_Peak_904;ID=orf19.3753;Name=orf19.3753;Peak-479692-482445;Summit-480715-480716;Dist-0	68	-	orf19.3753
Ca21chrR_C_albicans_SC5314	482855	483217	MSPC_Peak_875;ID=orf19.3753;Name=orf19.3753;Peak-479692-482445;Summit-482991-483001;Dist--547	222.285	-	orf19.3753
Ca21chrR_C_albicans_SC5314	487691	488376	MSPC_Peak_872;ID=orf19.3751;Name=orf19.3751;Peak-490320-493304;Summit-488254-488255;Dist--2066	122.539	+	orf19.3751
Ca21chrR_C_albicans_SC5314	487691	488376	MSPC_Peak_872;ID=orf19.3751;Name=orf19.3751;Peak-490320-493304;Summit-488283-488284;Dist--2037	122.539	+	orf19.3751
Ca21chrR_C_albicans_SC5314	489174	489760	MSPC_Peak_868;ID=orf19.3751;Name=orf19.3751;Peak-490320-493304;Summit-489377-489378;Dist--943	inf	+	orf19.3751
Ca21chrR_C_albicans_SC5314	489174	489760	MSPC_Peak_868;ID=orf19.3751;Name=orf19.3751;Peak-490320-493304;Summit-489420-489421;Dist--900	inf	+	orf19.3751
Ca21chrR_C_albicans_SC5314	489174	489760	MSPC_Peak_868;ID=orf19.3751;Name=orf19.3751;Peak-490320-493304;Summit-489507-489508;Dist--813	inf	+	orf19.3751
Ca21chrR_C_albicans_SC5314	490343	491458	MSPC_Peak_861;ID=orf19.3751;Name=orf19.3751;Peak-490320-493304;Summit-490821-490822;Dist-0	59	+	orf19.3751
Ca21chrR_C_albicans_SC5314	491774	492058	MSPC_Peak_854;ID=orf19.3751;Name=orf19.3751;Peak-490320-493304;Summit-492001-492002;Dist-0	33	+	orf19.3751
Ca21chrR_C_albicans_SC5314	515688	516342	MSPC_Peak_849;ID=tV(AAC)3;Name=tV(AAC)3;Peak-515749-515822;Summit-516080-516081;Dist--259	inf	-	tV(AAC)3
Ca21chrR_C_albicans_SC5314	515688	516342	MSPC_Peak_849;ID=tV(AAC)3;Name=tV(AAC)3;Peak-515749-515822;Summit-516105-516106;Dist--284	inf	-	tV(AAC)3
Ca21chrR_C_albicans_SC5314	516805	517410	MSPC_Peak_841;ID=orf19.3736;Name=orf19.3736;Peak-516764-517873;Summit-517193-517194;Dist-0	150	-	orf19.3736
Ca21chrR_C_albicans_SC5314	523488	524198	MSPC_Peak_837;ID=orf19.3734;Name=orf19.3734;Peak-520053-522632;Summit-524063-524069;Dist--1432	inf	-	orf19.3734
Ca21chrR_C_albicans_SC5314	528231	528800	MSPC_Peak_831;ID=orf19.3732;Name=orf19.3732;Peak-527711-528637;Summit-528431-528432;Dist-0	48	+	orf19.3732
Ca21chrR_C_albicans_SC5314	547298	547549	MSPC_Peak_827;ID=snR33a;Name=snR33a;Peak-547330-547458;Summit-547453-547454;Dist-0	62	+	snR33a
Ca21chrR_C_albicans_SC5314	548021	548364	MSPC_Peak_822;ID=orf19.3719;Name=orf19.3719;Peak-548260-548730;Summit-548192-548200;Dist--61	inf	+	orf19.3719
Ca21chrR_C_albicans_SC5314	551581	552091	MSPC_Peak_818;ID=orf19.176;Name=orf19.176;Peak-550909-552009;Summit-551964-551965;Dist-0	40	+	orf19.176
Ca21chrR_C_albicans_SC5314	562890	564217	MSPC_Peak_811;ID=orf19.171;Name=orf19.171;Peak-561933-564684;Summit-562892-562893;Dist-0	14	+	orf19.171
Ca21chrR_C_albicans_SC5314	586559	590412	MSPC_Peak_807;ID=orf19.2822;Name=orf19.2822;Peak-585256-586101;Summit-586994-586996;Dist--894	inf	-	orf19.2822
Ca21chrR_C_albicans_SC5314	586559	590412	MSPC_Peak_807;ID=orf19.2822;Name=orf19.2822;Peak-585256-586101;Summit-589995-590021;Dist--3895	inf	-	orf19.2822
Ca21chrR_C_albicans_SC5314	597432	600515	MSPC_Peak_802;ID=orf19.2823;Name=orf19.2823;Peak-600293-602095;Summit-597754-597777;Dist--2517	inf	+	orf19.2823
Ca21chrR_C_albicans_SC5314	602403	603462	MSPC_Peak_775;ID=orf19.2827;Name=orf19.2827;Peak-615887-618253;Summit-602815-602821;Dist--13067	inf	+	orf19.2827
Ca21chrR_C_albicans_SC5314	604047	604699	MSPC_Peak_773;ID=orf19.2827;Name=orf19.2827;Peak-615887-618253;Summit-604244-604246;Dist--11642	inf	+	orf19.2827
Ca21chrR_C_albicans_SC5314	604047	604699	MSPC_Peak_773;ID=orf19.2827;Name=orf19.2827;Peak-615887-618253;Summit-604290-604291;Dist--11597	inf	+	orf19.2827
Ca21chrR_C_albicans_SC5314	606633	608430	MSPC_Peak_772;ID=orf19.2827;Name=orf19.2827;Peak-615887-618253;Summit-608021-608030;Dist--7858	inf	+	orf19.2827
Ca21chrR_C_albicans_SC5314	608935	609547	MSPC_Peak_770;ID=orf19.2825;Name=orf19.2825;Peak-609134-610363;Summit-609179-609180;Dist-0	123.536	-	orf19.2825
Ca21chrR_C_albicans_SC5314	608935	609547	MSPC_Peak_770;ID=orf19.2825;Name=orf19.2825;Peak-609134-610363;Summit-609213-609214;Dist-0	123.536	-	orf19.2825
Ca21chrR_C_albicans_SC5314	611482	612206	MSPC_Peak_768;ID=orf19.2825;Name=orf19.2825;Peak-609134-610363;Summit-611829-611830;Dist--1467	161	-	orf19.2825
Ca21chrR_C_albicans_SC5314	623987	625108	MSPC_Peak_766;ID=orf19.2831;Name=orf19.2831;Peak-622663-623532;Summit-624383-624389;Dist--852	inf	-	orf19.2831
Ca21chrR_C_albicans_SC5314	644437	646281	MSPC_Peak_763;ID=orf19.2841;Name=orf19.2841;Peak-644428-646110;Summit-645394-645395;Dist-0	41	+	orf19.2841
Ca21chrR_C_albicans_SC5314	644437	646281	MSPC_Peak_763;ID=orf19.2841;Name=orf19.2841;Peak-644428-646110;Summit-645798-645799;Dist-0	41	+	orf19.2841
Ca21chrR_C_albicans_SC5314	653880	654117	MSPC_Peak_761;ID=orf19.2843;Name=orf19.2843;Peak-653856-654452;Summit-654095-654096;Dist-0	25	+	orf19.2843
Ca21chrR_C_albicans_SC5314	654463	654747	MSPC_Peak_758;ID=orf19.2844;Name=orf19.2844;Peak-655168-657654;Summit-654466-654467;Dist--702	16	+	orf19.2844
Ca21chrR_C_albicans_SC5314	718394	719087	MSPC_Peak_755;ID=orf19.2400;Name=orf19.2400;Peak-724234-726351;Summit-718682-718683;Dist--5552	231.826	+	orf19.2400
Ca21chrR_C_albicans_SC5314	718394	719087	MSPC_Peak_755;ID=orf19.2400;Name=orf19.2400;Peak-724234-726351;Summit-718725-718728;Dist--5507	231.826	+	orf19.2400
Ca21chrR_C_albicans_SC5314	774863	775198	MSPC_Peak_752;ID=orf19.4393;Name=orf19.4393;Peak-777837-779333;Summit-775069-775070;Dist--2768	55	+	orf19.4393
Ca21chrR_C_albicans_SC5314	778986	779594	MSPC_Peak_745;ID=orf19.4393;Name=orf19.4393;Peak-777837-779333;Summit-779222-779223;Dist-0	73	+	orf19.4393
Ca21chrR_C_albicans_SC5314	807687	808145	MSPC_Peak_738;ID=orf19.4363;Name=orf19.4363;Peak-809883-812918;Summit-807850-807851;Dist--2033	294.621	+	orf19.4363
Ca21chrR_C_albicans_SC5314	807687	808145	MSPC_Peak_738;ID=orf19.4363;Name=orf19.4363;Peak-809883-812918;Summit-807892-807900;Dist--1984	294.621	+	orf19.4363
Ca21chrR_C_albicans_SC5314	832650	833175	MSPC_Peak_731;ID=orf19.4371;Name=orf19.4371;Peak-831860-832831;Summit-832679-832680;Dist-0	19	+	orf19.4371
Ca21chrR_C_albicans_SC5314	839837	840865	MSPC_Peak_702;ID=orf19.4374;Name=orf19.4374;Peak-836857-838038;Summit-840176-840177;Dist--2139	101.619	-	orf19.4374
Ca21chrR_C_albicans_SC5314	839837	840865	MSPC_Peak_702;ID=orf19.4375.1;Name=orf19.4375.1;Peak-840283-840810;Summit-840309-840310;Dist-0	101.619	-	orf19.4375.1
Ca21chrR_C_albicans_SC5314	842351	842870	MSPC_Peak_697;ID=orf19.4376;Name=orf19.4376;Peak-841233-841970;Summit-842578-842595;Dist--609	inf	-	orf19.4376
Ca21chrR_C_albicans_SC5314	843546	844373	MSPC_Peak_692;ID=orf19.4376;Name=orf19.4376;Peak-841233-841970;Summit-843787-843788;Dist--1818	177.381	-	orf19.4376
Ca21chrR_C_albicans_SC5314	843546	844373	MSPC_Peak_692;ID=orf19.4376;Name=orf19.4376;Peak-841233-841970;Summit-843829-843830;Dist--1860	177.381	-	orf19.4376
Ca21chrR_C_albicans_SC5314	870436	871857	MSPC_Peak_688;ID=orf19.4357;Name=orf19.4357;Peak-862765-864429;Summit-871407-871423;Dist--6979	inf	-	orf19.4357
Ca21chrR_C_albicans_SC5314	873729	877569	MSPC_Peak_683;ID=orf19.467;Name=orf19.467;Peak-878587-880515;Summit-875569-875580;Dist--3008	inf	+	orf19.467
Ca21chrR_C_albicans_SC5314	873729	877569	MSPC_Peak_683;ID=orf19.467;Name=orf19.467;Peak-878587-880515;Summit-877271-877275;Dist--1313	inf	+	orf19.467
Ca21chrR_C_albicans_SC5314	904366	904685	MSPC_Peak_679;ID=orf19.484;Name=orf19.484;Peak-904433-905449;Summit-904473-904474;Dist-0	56	-	orf19.484
Ca21chrR_C_albicans_SC5314	917697	918523	MSPC_Peak_674;ID=orf19.492;Name=orf19.492;Peak-917844-919622;Summit-917960-917961;Dist-0	172	-	orf19.492
Ca21chrR_C_albicans_SC5314	918771	919621	MSPC_Peak_670;ID=orf19.492;Name=orf19.492;Peak-917844-919622;Summit-918833-918834;Dist-0	115.564	-	orf19.492
Ca21chrR_C_albicans_SC5314	918771	919621	MSPC_Peak_670;ID=orf19.492;Name=orf19.492;Peak-917844-919622;Summit-919211-919212;Dist-0	115.564	-	orf19.492
Ca21chrR_C_albicans_SC5314	920184	921009	MSPC_Peak_667;ID=orf19.493;Name=orf19.493;Peak-920411-921025;Summit-920493-920494;Dist-0	287.175	-	orf19.493
Ca21chrR_C_albicans_SC5314	920184	921009	MSPC_Peak_667;ID=orf19.493;Name=orf19.493;Peak-920411-921025;Summit-920541-920542;Dist-0	287.175	-	orf19.493
Ca21chrR_C_albicans_SC5314	955212	955549	MSPC_Peak_664;ID=SCR1;Name=SCR1;Peak-955252-955516;Summit-955400-955401;Dist-0	inf	+	SCR1
Ca21chrR_C_albicans_SC5314	955212	955549	MSPC_Peak_664;ID=SCR1;Name=SCR1;Peak-955252-955516;Summit-955428-955429;Dist-0	inf	+	SCR1
Ca21chrR_C_albicans_SC5314	970320	970810	MSPC_Peak_661;ID=orf19.528;Name=orf19.528;Peak-970338-973196;Summit-970705-970706;Dist-0	54	-	orf19.528
Ca21chrR_C_albicans_SC5314	971557	972001	MSPC_Peak_658;ID=orf19.528;Name=orf19.528;Peak-970338-973196;Summit-971607-971608;Dist-0	40	-	orf19.528
Ca21chrR_C_albicans_SC5314	981745	982177	MSPC_Peak_655;ID=orf19.532;Name=orf19.532;Peak-979270-979776;Summit-981844-981845;Dist--2069	188	-	orf19.532
Ca21chrR_C_albicans_SC5314	1004580	1005491	MSPC_Peak_651;ID=orf19.548;Name=orf19.548;Peak-1002197-1003270;Summit-1004748-1004749;Dist--1479	125.529	-	orf19.548
Ca21chrR_C_albicans_SC5314	1004580	1005491	MSPC_Peak_651;ID=orf19.550;Name=orf19.550;Peak-1004844-1005653;Summit-1004908-1004909;Dist-0	125.529	-	orf19.550
Ca21chrR_C_albicans_SC5314	1016111	1016570	MSPC_Peak_645;ID=orf19.1738;Name=orf19.1738;Peak-1016412-1018054;Summit-1016444-1016445;Dist-0	30	-	orf19.1738
Ca21chrR_C_albicans_SC5314	1017206	1017968	MSPC_Peak_620;ID=orf19.1738;Name=orf19.1738;Peak-1016412-1018054;Summit-1017337-1017338;Dist-0	16	-	orf19.1738
Ca21chrR_C_albicans_SC5314	1019976	1020383	MSPC_Peak_615;ID=tS(GCU)1;Name=tS(GCU)1;Peak-1020227-1020341;Summit-1020237-1020270;Dist-0	118.394	-	tS(GCU)1
Ca21chrR_C_albicans_SC5314	1027309	1027725	MSPC_Peak_610;ID=orf19.6317;Name=orf19.6317;Peak-1027478-1031590;Summit-1027540-1027541;Dist-0	52	-	orf19.6317
Ca21chrR_C_albicans_SC5314	1028748	1031652	MSPC_Peak_606;ID=orf19.6317;Name=orf19.6317;Peak-1027478-1031590;Summit-1029300-1029301;Dist-0	141.245	-	orf19.6317
Ca21chrR_C_albicans_SC5314	1028748	1031652	MSPC_Peak_606;ID=orf19.6317;Name=orf19.6317;Peak-1027478-1031590;Summit-1030102-1030103;Dist-0	141.245	-	orf19.6317
Ca21chrR_C_albicans_SC5314	1028748	1031652	MSPC_Peak_606;ID=orf19.6317;Name=orf19.6317;Peak-1027478-1031590;Summit-1030503-1030504;Dist-0	141.245	-	orf19.6317
Ca21chrR_C_albicans_SC5314	1095484	1095831	MSPC_Peak_602;ID=orf19.646;Name=orf19.646;Peak-1095525-1096646;Summit-1095727-1095728;Dist-0	71.766	+	orf19.646
Ca21chrR_C_albicans_SC5314	1095484	1095831	MSPC_Peak_602;ID=orf19.646;Name=orf19.646;Peak-1095525-1096646;Summit-1095791-1095792;Dist-0	71.766	+	orf19.646
Ca21chrR_C_albicans_SC5314	1119390	1120323	MSPC_Peak_596;ID=orf19.637;Name=orf19.637;Peak-1119650-1120441;Summit-1119737-1119738;Dist-0	24	-	orf19.637
Ca21chrR_C_albicans_SC5314	1125387	1125875	MSPC_Peak_591;ID=orf19.557;Name=orf19.557;Peak-1125729-1126754;Summit-1125653-1125654;Dist--76	inf	+	orf19.557
Ca21chrR_C_albicans_SC5314	1125387	1125875	MSPC_Peak_591;ID=orf19.557;Name=orf19.557;Peak-1125729-1126754;Summit-1125687-1125688;Dist--42	inf	+	orf19.557
Ca21chrR_C_albicans_SC5314	1125387	1125875	MSPC_Peak_591;ID=orf19.557;Name=orf19.557;Peak-1125729-1126754;Summit-1125736-1125737;Dist-0	inf	+	orf19.557
Ca21chrR_C_albicans_SC5314	1146139	1146393	MSPC_Peak_587;ID=orf19.5289;Name=orf19.5289;Peak-1146111-1146425;Summit-1146232-1146233;Dist-0	122	-	orf19.5289
Ca21chrR_C_albicans_SC5314	1148483	1149813	MSPC_Peak_581;ID=orf19.5288;Name=orf19.5288;Peak-1148654-1149961;Summit-1148820-1148821;Dist-0	164.414	-	orf19.5288
Ca21chrR_C_albicans_SC5314	1148483	1149813	MSPC_Peak_581;ID=orf19.5288;Name=orf19.5288;Peak-1148654-1149961;Summit-1149142-1149143;Dist-0	164.414	-	orf19.5288
Ca21chrR_C_albicans_SC5314	1151557	1152096	MSPC_Peak_575;ID=snR161a;Name=snR161a;Peak-1151680-1151746;Summit-1151667-1151672;Dist--9	195.34	+	snR161a
Ca21chrR_C_albicans_SC5314	1154751	1155649	MSPC_Peak_568;ID=TER1;Name=TER1;Peak-1153867-1155410;Summit-1154998-1154999;Dist-0	46.944	+	TER1
Ca21chrR_C_albicans_SC5314	1154751	1155649	MSPC_Peak_568;ID=orf19.5287;Name=orf19.5287;Peak-1151805-1153364;Summit-1155423-1155424;Dist--2060	46.944	-	orf19.5287
Ca21chrR_C_albicans_SC5314	1158831	1159183	MSPC_Peak_563;ID=tR(ACG)2;Name=tR(ACG)2;Peak-1158902-1158997;Summit-1158973-1158992;Dist-0	inf	-	tR(ACG)2
Ca21chrR_C_albicans_SC5314	1158831	1159183	MSPC_Peak_563;ID=tR(ACG)2;Name=tR(ACG)2;Peak-1158902-1158997;Summit-1159019-1159020;Dist--23	inf	-	tR(ACG)2
Ca21chrR_C_albicans_SC5314	1164242	1164741	MSPC_Peak_559;ID=orf19.3516;Name=orf19.3516;Peak-1162696-1163343;Summit-1164505-1164506;Dist--1163	290.17	-	orf19.3516
Ca21chrR_C_albicans_SC5314	1164242	1164741	MSPC_Peak_559;ID=orf19.3516;Name=orf19.3516;Peak-1162696-1163343;Summit-1164558-1164559;Dist--1216	290.17	-	orf19.3516
Ca21chrR_C_albicans_SC5314	1190767	1191143	MSPC_Peak_557;ID=tC(GCA)2;Name=tC(GCA)2;Peak-1190811-1190905;Summit-1190955-1190980;Dist--51	inf	-	tC(GCA)2
Ca21chrR_C_albicans_SC5314	1193683	1194310	MSPC_Peak_542;ID=orf19.5843;Name=orf19.5843;Peak-1194056-1194904;Summit-1194265-1194266;Dist-0	29	-	orf19.5843
Ca21chrR_C_albicans_SC5314	1195097	1195669	MSPC_Peak_539;ID=orf19.5843;Name=orf19.5843;Peak-1194056-1194904;Summit-1195495-1195497;Dist--592	227.275	-	orf19.5843
Ca21chrR_C_albicans_SC5314	1198233	1199072	MSPC_Peak_538;ID=orf19.6652;Name=orf19.6652;Peak-1201128-1202450;Summit-1198662-1198663;Dist--2466	inf	+	orf19.6652
Ca21chrR_C_albicans_SC5314	1198233	1199072	MSPC_Peak_538;ID=orf19.6652;Name=orf19.6652;Peak-1201128-1202450;Summit-1198707-1198709;Dist--2420	inf	+	orf19.6652
Ca21chrR_C_albicans_SC5314	1207484	1208522	MSPC_Peak_536;ID=orf19.6645;Name=orf19.6645;Peak-1207777-1208448;Summit-1208150-1208151;Dist-0	58	-	orf19.6645
Ca21chrR_C_albicans_SC5314	1214427	1215222	MSPC_Peak_533;ID=orf19.6640;Name=orf19.6640;Peak-1213719-1215155;Summit-1215133-1215134;Dist-0	90	+	orf19.6640
Ca21chrR_C_albicans_SC5314	1229369	1229687	MSPC_Peak_532;ID=tP(UGG)5;Name=tP(UGG)5;Peak-1229519-1229609;Summit-1229556-1229564;Dist-0	inf	-	tP(UGG)5
Ca21chrR_C_albicans_SC5314	1230005	1230303	MSPC_Peak_530;ID=tP(UGG)4;Name=tP(UGG)4;Peak-1230106-1230196;Summit-1230156-1230164;Dist-0	inf	-	tP(UGG)4
Ca21chrR_C_albicans_SC5314	1233057	1233555	MSPC_Peak_527;ID=tV(AAC)4;Name=tV(AAC)4;Peak-1233262-1233335;Summit-1233278-1233297;Dist-0	inf	+	tV(AAC)4
Ca21chrR_C_albicans_SC5314	1234545	1234793	MSPC_Peak_524;ID=tS(AGA)3;Name=tS(AGA)3;Peak-1234648-1234729;Summit-1234690-1234691;Dist-0	inf	+	tS(AGA)3
Ca21chrR_C_albicans_SC5314	1239189	1240534	MSPC_Peak_521;ID=orf19.6625;Name=orf19.6625;Peak-1235823-1236650;Summit-1239252-1239253;Dist--2603	63	-	orf19.6625
Ca21chrR_C_albicans_SC5314	1242011	1242452	MSPC_Peak_519;ID=orf19.6621;Name=orf19.6621;Peak-1239263-1242892;Summit-1242343-1242344;Dist-0	38	-	orf19.6621
Ca21chrR_C_albicans_SC5314	1243544	1243931	MSPC_Peak_516;ID=tS(AGA)1;Name=tS(AGA)1;Peak-1243761-1243842;Summit-1243776-1243782;Dist-0	inf	-	tS(AGA)1
Ca21chrR_C_albicans_SC5314	1243544	1243931	MSPC_Peak_516;ID=tS(AGA)1;Name=tS(AGA)1;Peak-1243761-1243842;Summit-1243805-1243806;Dist-0	inf	-	tS(AGA)1
Ca21chrR_C_albicans_SC5314	1259449	1259781	MSPC_Peak_511;ID=orf19.454;Name=orf19.454;Peak-1255743-1258160;Summit-1259561-1259570;Dist--1402	inf	-	orf19.454
Ca21chrR_C_albicans_SC5314	1267496	1267807	MSPC_Peak_505;ID=orf19.451;Name=orf19.451;Peak-1274197-1276674;Summit-1267650-1267663;Dist--6535	242.786	+	orf19.451
Ca21chrR_C_albicans_SC5314	1274867	1275217	MSPC_Peak_499;ID=orf19.451;Name=orf19.451;Peak-1274197-1276674;Summit-1274937-1274938;Dist-0	32	+	orf19.451
Ca21chrR_C_albicans_SC5314	1297063	1297332	MSPC_Peak_475;ID=orf19.3861;Name=orf19.3861;Peak-1297556-1298587;Summit-1297224-1297225;Dist--332	103	+	orf19.3861
Ca21chrR_C_albicans_SC5314	1312340	1312973	MSPC_Peak_468;ID=orf19.3869;Name=orf19.3869;Peak-1316661-1318415;Summit-1312471-1312472;Dist--4190	209.91	+	orf19.3869
Ca21chrR_C_albicans_SC5314	1312340	1312973	MSPC_Peak_468;ID=orf19.3869;Name=orf19.3869;Peak-1316661-1318415;Summit-1312614-1312615;Dist--4047	209.91	+	orf19.3869
Ca21chrR_C_albicans_SC5314	1312340	1312973	MSPC_Peak_468;ID=orf19.3869;Name=orf19.3869;Peak-1316661-1318415;Summit-1312652-1312653;Dist--4009	209.91	+	orf19.3869
Ca21chrR_C_albicans_SC5314	1313258	1313568	MSPC_Peak_462;ID=orf19.3869;Name=orf19.3869;Peak-1316661-1318415;Summit-1313382-1313383;Dist--3279	113	+	orf19.3869
Ca21chrR_C_albicans_SC5314	1315633	1316092	MSPC_Peak_457;ID=orf19.3868;Name=orf19.3868;Peak-1315882-1316235;Summit-1315933-1315934;Dist-0	56.864	-	orf19.3868
Ca21chrR_C_albicans_SC5314	1315633	1316092	MSPC_Peak_457;ID=orf19.3868;Name=orf19.3868;Peak-1315882-1316235;Summit-1315999-1316000;Dist-0	56.864	-	orf19.3868
Ca21chrR_C_albicans_SC5314	1318744	1321249	MSPC_Peak_452;ID=orf19.3870;Name=orf19.3870;Peak-1318908-1320356;Summit-1319036-1319037;Dist-0	inf	-	orf19.3870
Ca21chrR_C_albicans_SC5314	1318744	1321249	MSPC_Peak_452;ID=orf19.3870;Name=orf19.3870;Peak-1318908-1320356;Summit-1319374-1319375;Dist-0	inf	-	orf19.3870
Ca21chrR_C_albicans_SC5314	1318744	1321249	MSPC_Peak_452;ID=orf19.3870;Name=orf19.3870;Peak-1318908-1320356;Summit-1320882-1320883;Dist--527	inf	-	orf19.3870
Ca21chrR_C_albicans_SC5314	1318744	1321249	MSPC_Peak_452;ID=orf19.3870;Name=orf19.3870;Peak-1318908-1320356;Summit-1320932-1320933;Dist--577	inf	-	orf19.3870
Ca21chrR_C_albicans_SC5314	1323913	1324957	MSPC_Peak_448;ID=orf19.3874;Name=orf19.3874;Peak-1326372-1328222;Summit-1324297-1324298;Dist--2075	192.347	+	orf19.3874
Ca21chrR_C_albicans_SC5314	1323913	1324957	MSPC_Peak_448;ID=snR61;Name=snR61;Peak-1324303-1324393;Summit-1324369-1324370;Dist-0	192.347	-	snR61
Ca21chrR_C_albicans_SC5314	1344410	1344812	MSPC_Peak_444;ID=orf19.3888;Name=orf19.3888;Peak-1343195-1344847;Summit-1344410-1344411;Dist-0	13	-	orf19.3888
Ca21chrR_C_albicans_SC5314	1350741	1350979	MSPC_Peak_439;ID=orf19.727;Name=orf19.727;Peak-1348994-1350532;Summit-1350952-1350953;Dist--421	37	-	orf19.727
Ca21chrR_C_albicans_SC5314	1352711	1353155	MSPC_Peak_437;ID=orf19.727;Name=orf19.727;Peak-1348994-1350532;Summit-1352742-1352743;Dist--2211	137.49	-	orf19.727
Ca21chrR_C_albicans_SC5314	1352711	1353155	MSPC_Peak_437;ID=orf19.727;Name=orf19.727;Peak-1348994-1350532;Summit-1352776-1352777;Dist--2245	137.49	-	orf19.727
Ca21chrR_C_albicans_SC5314	1353457	1354129	MSPC_Peak_435;ID=orf19.727;Name=orf19.727;Peak-1348994-1350532;Summit-1353777-1353783;Dist--3246	inf	-	orf19.727
Ca21chrR_C_albicans_SC5314	1354422	1354753	MSPC_Peak_433;ID=orf19.727;Name=orf19.727;Peak-1348994-1350532;Summit-1354609-1354623;Dist--4078	inf	-	orf19.727
Ca21chrR_C_albicans_SC5314	1355889	1356159	MSPC_Peak_431;ID=orf19.727;Name=orf19.727;Peak-1348994-1350532;Summit-1356065-1356066;Dist--5534	69	-	orf19.727
Ca21chrR_C_albicans_SC5314	1359243	1359540	MSPC_Peak_429;ID=orf19.726;Name=orf19.726;Peak-1364440-1365888;Summit-1359352-1359353;Dist--5088	99	+	orf19.726
Ca21chrR_C_albicans_SC5314	1372011	1372681	MSPC_Peak_425;ID=orf19.723;Name=orf19.723;Peak-1368310-1370532;Summit-1372216-1372232;Dist--1685	inf	-	orf19.723
Ca21chrR_C_albicans_SC5314	1372975	1373982	MSPC_Peak_403;ID=orf19.723;Name=orf19.723;Peak-1368310-1370532;Summit-1373096-1373097;Dist--2565	inf	-	orf19.723
Ca21chrR_C_albicans_SC5314	1372975	1373982	MSPC_Peak_403;ID=orf19.723;Name=orf19.723;Peak-1368310-1370532;Summit-1373121-1373122;Dist--2590	inf	-	orf19.723
Ca21chrR_C_albicans_SC5314	1372975	1373982	MSPC_Peak_403;ID=orf19.723;Name=orf19.723;Peak-1368310-1370532;Summit-1373839-1373840;Dist--3308	inf	-	orf19.723
Ca21chrR_C_albicans_SC5314	1372975	1373982	MSPC_Peak_403;ID=orf19.723;Name=orf19.723;Peak-1368310-1370532;Summit-1373870-1373872;Dist--3339	inf	-	orf19.723
Ca21chrR_C_albicans_SC5314	1388647	1389805	MSPC_Peak_396;ID=orf19.717;Name=orf19.717;Peak-1386474-1388174;Summit-1388884-1388885;Dist--711	181.372	-	orf19.717
Ca21chrR_C_albicans_SC5314	1388647	1389805	MSPC_Peak_396;ID=orf19.716;Name=orf19.716;Peak-1389195-1389695;Summit-1389499-1389500;Dist-0	181.372	-	orf19.716
Ca21chrR_C_albicans_SC5314	1401825	1404423	MSPC_Peak_391;ID=orf19.915;Name=orf19.915;Peak-1401527-1403641;Summit-1403358-1403363;Dist-0	270.693	-	orf19.915
Ca21chrR_C_albicans_SC5314	1401825	1404423	MSPC_Peak_391;ID=orf19.915;Name=orf19.915;Peak-1401527-1403641;Summit-1404089-1404090;Dist--449	270.693	-	orf19.915
Ca21chrR_C_albicans_SC5314	1405141	1405573	MSPC_Peak_386;ID=orf19.693;Name=orf19.693;Peak-1406210-1406908;Summit-1405316-1405317;Dist--894	57	+	orf19.693
Ca21chrR_C_albicans_SC5314	1410872	1411182	MSPC_Peak_379;ID=orf19.695;Name=orf19.695;Peak-1409092-1410390;Summit-1410981-1410989;Dist--592	inf	-	orf19.695
Ca21chrR_C_albicans_SC5314	1410872	1411182	MSPC_Peak_379;ID=orf19.695;Name=orf19.695;Peak-1409092-1410390;Summit-1411041-1411042;Dist--652	inf	-	orf19.695
Ca21chrR_C_albicans_SC5314	1424050	1424677	MSPC_Peak_371;ID=snR66;Name=snR66;Peak-1424405-1424542;Summit-1424441-1424442;Dist-0	101	+	snR66
Ca21chrR_C_albicans_SC5314	1431206	1433230	MSPC_Peak_365;ID=orf19.701;Name=orf19.701;Peak-1433938-1436157;Summit-1431653-1431670;Dist--2269	inf	+	orf19.701
Ca21chrR_C_albicans_SC5314	1431206	1433230	MSPC_Peak_365;ID=orf19.701;Name=orf19.701;Peak-1433938-1436157;Summit-1432743-1432744;Dist--1195	inf	+	orf19.701
Ca21chrR_C_albicans_SC5314	1431206	1433230	MSPC_Peak_365;ID=orf19.701;Name=orf19.701;Peak-1433938-1436157;Summit-1433042-1433043;Dist--896	inf	+	orf19.701
Ca21chrR_C_albicans_SC5314	1451253	1451850	MSPC_Peak_358;ID=orf19.1860;Name=orf19.1860;Peak-1451449-1453087;Summit-1451849-1451850;Dist-0	14	-	orf19.1860
Ca21chrR_C_albicans_SC5314	1452491	1452997	MSPC_Peak_354;ID=orf19.1860;Name=orf19.1860;Peak-1451449-1453087;Summit-1452491-1452492;Dist-0	80.713	-	orf19.1860
Ca21chrR_C_albicans_SC5314	1452491	1452997	MSPC_Peak_354;ID=orf19.1860;Name=orf19.1860;Peak-1451449-1453087;Summit-1452573-1452574;Dist-0	80.713	-	orf19.1860
Ca21chrR_C_albicans_SC5314	1452491	1452997	MSPC_Peak_354;ID=orf19.1860;Name=orf19.1860;Peak-1451449-1453087;Summit-1452618-1452619;Dist-0	80.713	-	orf19.1860
Ca21chrR_C_albicans_SC5314	1473969	1474346	MSPC_Peak_349;ID=tS(AGA)2;Name=tS(AGA)2;Peak-1474122-1474203;Summit-1474166-1474185;Dist-0	inf	-	tS(AGA)2
Ca21chrR_C_albicans_SC5314	1474635	1475756	MSPC_Peak_344;ID=tS(AGA)2;Name=tS(AGA)2;Peak-1474122-1474203;Summit-1475245-1475246;Dist--1043	inf	-	tS(AGA)2
Ca21chrR_C_albicans_SC5314	1474635	1475756	MSPC_Peak_344;ID=tS(AGA)2;Name=tS(AGA)2;Peak-1474122-1474203;Summit-1475326-1475327;Dist--1124	inf	-	tS(AGA)2
Ca21chrR_C_albicans_SC5314	1474635	1475756	MSPC_Peak_344;ID=tS(AGA)2;Name=tS(AGA)2;Peak-1474122-1474203;Summit-1475354-1475355;Dist--1152	inf	-	tS(AGA)2
Ca21chrR_C_albicans_SC5314	1478070	1478405	MSPC_Peak_342;ID=orf19.1843;Name=orf19.1843;Peak-1475586-1477277;Summit-1478218-1478231;Dist--942	inf	-	orf19.1843
Ca21chrR_C_albicans_SC5314	1507133	1509148	MSPC_Peak_339;ID=orf19.2364;Name=orf19.2364;Peak-1507154-1509994;Summit-1507627-1507628;Dist-0	199.951	+	orf19.2364
Ca21chrR_C_albicans_SC5314	1507133	1509148	MSPC_Peak_339;ID=orf19.2364;Name=orf19.2364;Peak-1507154-1509994;Summit-1508432-1508433;Dist-0	199.951	+	orf19.2364
Ca21chrR_C_albicans_SC5314	1507133	1509148	MSPC_Peak_339;ID=orf19.2364;Name=orf19.2364;Peak-1507154-1509994;Summit-1508914-1508915;Dist-0	199.951	+	orf19.2364
Ca21chrR_C_albicans_SC5314	1509850	1510283	MSPC_Peak_335;ID=orf19.2364;Name=orf19.2364;Peak-1507154-1509994;Summit-1509852-1509853;Dist-0	16	+	orf19.2364
Ca21chrR_C_albicans_SC5314	1514338	1514996	MSPC_Peak_327;ID=orf19.2360;Name=orf19.2360;Peak-1514505-1521155;Summit-1514674-1514675;Dist-0	73	-	orf19.2360
Ca21chrR_C_albicans_SC5314	1521501	1521963	MSPC_Peak_306;ID=orf19.2360;Name=orf19.2360;Peak-1514505-1521155;Summit-1521871-1521872;Dist--717	99	-	orf19.2360
Ca21chrR_C_albicans_SC5314	1525272	1525563	MSPC_Peak_302;ID=orf19.2356;Name=orf19.2356;Peak-1523701-1525254;Summit-1525414-1525415;Dist--161	241	-	orf19.2356
Ca21chrR_C_albicans_SC5314	1525810	1526338	MSPC_Peak_297;ID=orf19.2356;Name=orf19.2356;Peak-1523701-1525254;Summit-1526080-1526088;Dist--827	inf	-	orf19.2356
Ca21chrR_C_albicans_SC5314	1559287	1560702	MSPC_Peak_293;ID=orf19.734;Name=orf19.734;Peak-1559103-1560521;Summit-1560276-1560277;Dist-0	59	+	orf19.734
Ca21chrR_C_albicans_SC5314	1577177	1577422	MSPC_Peak_289;ID=orf19.6146;Name=orf19.6146;Peak-1577043-1577798;Summit-1577179-1577180;Dist-0	15	-	orf19.6146
Ca21chrR_C_albicans_SC5314	1587360	1588831	MSPC_Peak_286;ID=orf19.6139;Name=orf19.6139;Peak-1587228-1588439;Summit-1587552-1587553;Dist-0	inf	+	orf19.6139
Ca21chrR_C_albicans_SC5314	1587360	1588831	MSPC_Peak_286;ID=orf19.6138;Name=orf19.6138;Peak-1589637-1591829;Summit-1588662-1588663;Dist--975	inf	+	orf19.6138
Ca21chrR_C_albicans_SC5314	1607862	1608275	MSPC_Peak_283;ID=tK(UUU)2;Name=tK(UUU)2;Peak-1608048-1608122;Summit-1608080-1608088;Dist-0	inf	-	tK(UUU)2
Ca21chrR_C_albicans_SC5314	1609406	1609943	MSPC_Peak_281;ID=orf19.6126;Name=orf19.6126;Peak-1609238-1610563;Summit-1609666-1609667;Dist-0	52.894	+	orf19.6126
Ca21chrR_C_albicans_SC5314	1609406	1609943	MSPC_Peak_281;ID=orf19.6126;Name=orf19.6126;Peak-1609238-1610563;Summit-1609755-1609756;Dist-0	52.894	+	orf19.6126
Ca21chrR_C_albicans_SC5314	1610374	1610871	MSPC_Peak_278;ID=orf19.6126;Name=orf19.6126;Peak-1609238-1610563;Summit-1610375-1610376;Dist-0	45.953	+	orf19.6126
Ca21chrR_C_albicans_SC5314	1610374	1610871	MSPC_Peak_278;ID=orf19.6124;Name=orf19.6124;Peak-1611848-1614199;Summit-1610749-1610750;Dist--1099	45.953	+	orf19.6124
Ca21chrR_C_albicans_SC5314	1657184	1657471	MSPC_Peak_273;ID=orf19.6286.2;Name=orf19.6286.2;Peak-1657249-1657927;Summit-1657293-1657294;Dist-0	59	-	orf19.6286.2
Ca21chrR_C_albicans_SC5314	1657643	1657943	MSPC_Peak_270;ID=orf19.6286.2;Name=orf19.6286.2;Peak-1657249-1657927;Summit-1657658-1657659;Dist-0	23	-	orf19.6286.2
Ca21chrR_C_albicans_SC5314	1661219	1661942	MSPC_Peak_266;ID=orf19.6285;Name=orf19.6285;Peak-1660910-1661902;Summit-1661558-1661559;Dist-0	157	+	orf19.6285
Ca21chrR_C_albicans_SC5314	1662418	1662727	MSPC_Peak_263;ID=orf19.6283;Name=orf19.6283;Peak-1664160-1664948;Summit-1662551-1662552;Dist--1609	63	+	orf19.6283
Ca21chrR_C_albicans_SC5314	1694954	1695232	MSPC_Peak_256;ID=orf19.3710;Name=orf19.3710;Peak-1696963-1698165;Summit-1695103-1695104;Dist--1860	177	+	orf19.3710
Ca21chrR_C_albicans_SC5314	1697307	1697803	MSPC_Peak_239;ID=orf19.3710;Name=orf19.3710;Peak-1696963-1698165;Summit-1697769-1697770;Dist-0	35	+	orf19.3710
Ca21chrR_C_albicans_SC5314	1698235	1698473	MSPC_Peak_235;ID=orf19.3711;Name=orf19.3711;Peak-1700050-1702239;Summit-1698247-1698248;Dist--1803	19	+	orf19.3711
Ca21chrR_C_albicans_SC5314	1702569	1703465	MSPC_Peak_229;ID=orf19.3714;Name=orf19.3714;Peak-1706954-1708801;Summit-1702978-1702979;Dist--3976	117	+	orf19.3714
Ca21chrR_C_albicans_SC5314	1713532	1713872	MSPC_Peak_224;ID=tG(GCC)1;Name=tG(GCC)1;Peak-1713688-1713758;Summit-1713703-1713722;Dist-0	inf	-	tG(GCC)1
Ca21chrR_C_albicans_SC5314	1716139	1722083	MSPC_Peak_220;ID=tG(GCC)1;Name=tG(GCC)1;Peak-1713688-1713758;Summit-1716962-1716963;Dist--3205	inf	-	tG(GCC)1
Ca21chrR_C_albicans_SC5314	1716139	1722083	MSPC_Peak_220;ID=orf19.610;Name=orf19.610;Peak-1723589-1725166;Summit-1719704-1719705;Dist--3885	inf	+	orf19.610
Ca21chrR_C_albicans_SC5314	1716139	1722083	MSPC_Peak_220;ID=orf19.610;Name=orf19.610;Peak-1723589-1725166;Summit-1721170-1721171;Dist--2419	inf	+	orf19.610
Ca21chrR_C_albicans_SC5314	1716139	1722083	MSPC_Peak_220;ID=orf19.610;Name=orf19.610;Peak-1723589-1725166;Summit-1721207-1721215;Dist--2375	inf	+	orf19.610
Ca21chrR_C_albicans_SC5314	1771787	1772088	MSPC_Peak_216;ID=orf19.6375;Name=orf19.6375;Peak-1772309-1772668;Summit-1772007-1772008;Dist--302	54	+	orf19.6375
Ca21chrR_C_albicans_SC5314	1772642	1773147	MSPC_Peak_213;ID=orf19.6376;Name=orf19.6376;Peak-1773751-1775493;Summit-1772905-1772906;Dist--846	78	+	orf19.6376
Ca21chrR_C_albicans_SC5314	1786879	1787242	MSPC_Peak_210;ID=tK(UUU)3;Name=tK(UUU)3;Peak-1787033-1787118;Summit-1787062-1787070;Dist-0	inf	-	tK(UUU)3
Ca21chrR_C_albicans_SC5314	1787732	1787965	MSPC_Peak_208;ID=tK(UUU)4;Name=tK(UUU)4;Peak-1787791-1787865;Summit-1787816-1787817;Dist-0	219	-	tK(UUU)4
Ca21chrR_C_albicans_SC5314	1788652	1789570	MSPC_Peak_206;ID=tK(UUU)5;Name=tK(UUU)5;Peak-1788796-1788870;Summit-1788844-1788846;Dist-0	194.342	+	tK(UUU)5
Ca21chrR_C_albicans_SC5314	1791867	1792133	MSPC_Peak_204;ID=orf19.6390;Name=orf19.6390;Peak-1791747-1792049;Summit-1791987-1792001;Dist-0	inf	-	orf19.6390
Ca21chrR_C_albicans_SC5314	1806068	1806375	MSPC_Peak_202;ID=orf19.6402;Name=orf19.6402;Peak-1805750-1806949;Summit-1806357-1806358;Dist-0	20	+	orf19.6402
Ca21chrR_C_albicans_SC5314	1813186	1813457	MSPC_Peak_200;ID=tI(AAU)5;Name=tI(AAU)5;Peak-1813285-1813370;Summit-1813353-1813354;Dist-0	242	+	tI(AAU)5
Ca21chrR_C_albicans_SC5314	1830474	1831895	MSPC_Peak_197;ID=orf19.6417;Name=orf19.6417;Peak-1832468-1834996;Summit-1830890-1830894;Dist--1575	257.222	+	orf19.6417
Ca21chrR_C_albicans_SC5314	1884667	1885174	MSPC_Peak_193;ID=tG(GCC)6;Name=tG(GCC)6;Peak-1882719-1882789;Summit-1884907-1884908;Dist--2119	inf	-	tG(GCC)6
Ca21chrR_C_albicans_SC5314	1885437	1887088	MSPC_Peak_179;ID=tG(GCC)6;Name=tG(GCC)6;Peak-1882719-1882789;Summit-1885624-1885640;Dist--2836	inf	-	tG(GCC)6
Ca21chrR_C_albicans_SC5314	1888956	1889304	MSPC_Peak_176;ID=RDN5;Name=RDN5;Peak-1889085-1889205;Summit-1889116-1889121;Dist-0	inf	-	RDN5
Ca21chrR_C_albicans_SC5314	1889996	1891378	MSPC_Peak_171;ID=RDN5;Name=RDN5;Peak-1889085-1889205;Summit-1890216-1890217;Dist--1012	inf	-	RDN5
Ca21chrR_C_albicans_SC5314	1889996	1891378	MSPC_Peak_171;ID=RDN18;Name=RDN18;Peak-1891387-1893173;Summit-1891151-1891152;Dist--236	inf	+	RDN18
Ca21chrR_C_albicans_SC5314	1919583	1920064	MSPC_Peak_168;ID=tM(CAU)4;Name=tM(CAU)4;Peak-1919711-1919784;Summit-1919733-1919748;Dist-0	inf	+	tM(CAU)4
Ca21chrR_C_albicans_SC5314	1937289	1938276	MSPC_Peak_163;ID=orf19.7304;Name=orf19.7304;Peak-1936814-1938292;Summit-1937682-1937683;Dist-0	56	-	orf19.7304
Ca21chrR_C_albicans_SC5314	1938579	1940048	MSPC_Peak_160;ID=orf19.7304;Name=orf19.7304;Peak-1936814-1938292;Summit-1939716-1939740;Dist--1425	inf	-	orf19.7304
Ca21chrR_C_albicans_SC5314	1945983	1946543	MSPC_Peak_156;ID=orf19.7308;Name=orf19.7308;Peak-1945442-1947002;Summit-1946402-1946403;Dist-0	91	-	orf19.7308
Ca21chrR_C_albicans_SC5314	1951415	1952489	MSPC_Peak_152;ID=orf19.7312;Name=orf19.7312;Peak-1951430-1952785;Summit-1951689-1951690;Dist-0	22	-	orf19.7312
Ca21chrR_C_albicans_SC5314	1968419	1971130	MSPC_Peak_150;ID=orf19.7322;Name=orf19.7322;Peak-1967278-1967721;Summit-1968769-1968770;Dist--1049	inf	-	orf19.7322
Ca21chrR_C_albicans_SC5314	1968419	1971130	MSPC_Peak_150;ID=orf19.7323;Name=orf19.7323;Peak-1968870-1970339;Summit-1968883-1968884;Dist-0	inf	-	orf19.7323
Ca21chrR_C_albicans_SC5314	1968419	1971130	MSPC_Peak_150;ID=orf19.7323;Name=orf19.7323;Peak-1968870-1970339;Summit-1970008-1970009;Dist-0	inf	-	orf19.7323
Ca21chrR_C_albicans_SC5314	1968419	1971130	MSPC_Peak_150;ID=orf19.7323;Name=orf19.7323;Peak-1968870-1970339;Summit-1970855-1970856;Dist--517	inf	-	orf19.7323
Ca21chrR_C_albicans_SC5314	1977785	1978172	MSPC_Peak_147;ID=orf19.7328;Name=orf19.7328;Peak-1977825-1980530;Summit-1978033-1978034;Dist-0	37	-	orf19.7328
Ca21chrR_C_albicans_SC5314	1981472	1981726	MSPC_Peak_143;ID=orf19.7329;Name=orf19.7329;Peak-1981163-1981666;Summit-1981505-1981506;Dist-0	26	+	orf19.7329
Ca21chrR_C_albicans_SC5314	2035108	2035516	MSPC_Peak_140;ID=orf19.6608;Name=orf19.6608;Peak-2032492-2034660;Summit-2035273-2035296;Dist--614	inf	-	orf19.6608
Ca21chrR_C_albicans_SC5314	2035872	2036223	MSPC_Peak_138;ID=orf19.6607;Name=orf19.6607;Peak-2035832-2036446;Summit-2035936-2035937;Dist-0	46	-	orf19.6607
Ca21chrR_C_albicans_SC5314	2036688	2037280	MSPC_Peak_136;ID=orf19.6607;Name=orf19.6607;Peak-2035832-2036446;Summit-2037002-2037020;Dist--557	inf	-	orf19.6607
Ca21chrR_C_albicans_SC5314	2039978	2040921	MSPC_Peak_134;ID=orf19.6604;Name=orf19.6604;Peak-2040213-2041588;Summit-2040515-2040516;Dist-0	29	-	orf19.6604
Ca21chrR_C_albicans_SC5314	2043322	2043776	MSPC_Peak_116;ID=orf19.6602;Name=orf19.6602;Peak-2042808-2043677;Summit-2043663-2043664;Dist-0	38	+	orf19.6602
Ca21chrR_C_albicans_SC5314	2059278	2059683	MSPC_Peak_112;ID=orf19.6594;Name=orf19.6594;Peak-2059297-2061195;Summit-2059554-2059555;Dist-0	44	-	orf19.6594
Ca21chrR_C_albicans_SC5314	2083521	2084178	MSPC_Peak_108;ID=orf19.7550;Name=orf19.7550;Peak-2078114-2080150;Summit-2083720-2083721;Dist--3571	36	-	orf19.7550
Ca21chrR_C_albicans_SC5314	2084460	2085076	MSPC_Peak_105;ID=orf19.7550;Name=orf19.7550;Peak-2078114-2080150;Summit-2084801-2084813;Dist--4652	inf	-	orf19.7550
Ca21chrR_C_albicans_SC5314	2085968	2086493	MSPC_Peak_100;ID=orf19.7551;Name=orf19.7551;Peak-2090795-2092468;Summit-2086209-2086210;Dist--4586	79	+	orf19.7551
Ca21chrR_C_albicans_SC5314	2090431	2090951	MSPC_Peak_95;ID=orf19.7551;Name=orf19.7551;Peak-2090795-2092468;Summit-2090505-2090521;Dist--275	139.484	+	orf19.7551
Ca21chrR_C_albicans_SC5314	2091038	2092760	MSPC_Peak_92;ID=orf19.7551;Name=orf19.7551;Peak-2090795-2092468;Summit-2092363-2092364;Dist-0	24	+	orf19.7551
Ca21chrR_C_albicans_SC5314	2099849	2100572	MSPC_Peak_90;ID=orf19.7558;Name=orf19.7558;Peak-2100853-2103315;Summit-2100245-2100256;Dist--598	inf	+	orf19.7558
Ca21chrR_C_albicans_SC5314	2099849	2100572	MSPC_Peak_90;ID=orf19.7558;Name=orf19.7558;Peak-2100853-2103315;Summit-2100331-2100332;Dist--522	inf	+	orf19.7558
Ca21chrR_C_albicans_SC5314	2105234	2105709	MSPC_Peak_87;ID=orf19.7561;Name=orf19.7561;Peak-2106215-2108878;Summit-2105563-2105576;Dist--640	inf	+	orf19.7561
Ca21chrR_C_albicans_SC5314	2110901	2111279	MSPC_Peak_85;ID=orf19.7565;Name=orf19.7565;Peak-2118782-2120479;Summit-2111052-2111078;Dist--7705	inf	+	orf19.7565
Ca21chrR_C_albicans_SC5314	2112155	2112766	MSPC_Peak_83;ID=orf19.7565;Name=orf19.7565;Peak-2118782-2120479;Summit-2112581-2112593;Dist--6190	inf	+	orf19.7565
Ca21chrR_C_albicans_SC5314	2124461	2124783	MSPC_Peak_82;ID=orf19.7566;Name=orf19.7566;Peak-2122928-2124643;Summit-2124585-2124586;Dist-0	45	+	orf19.7566
Ca21chrR_C_albicans_SC5314	2152257	2153613	MSPC_Peak_80;ID=orf19.7583;Name=orf19.7583;Peak-2152180-2154225;Summit-2152358-2152359;Dist-0	23	-	orf19.7583
Ca21chrR_C_albicans_SC5314	2154143	2154737	MSPC_Peak_51;ID=orf19.7583;Name=orf19.7583;Peak-2152180-2154225;Summit-2154226-2154232;Dist--2	66.869	-	orf19.7583
Ca21chrR_C_albicans_SC5314	2154143	2154737	MSPC_Peak_51;ID=orf19.7583;Name=orf19.7583;Peak-2152180-2154225;Summit-2154257-2154258;Dist--33	66.869	-	orf19.7583
Ca21chrR_C_albicans_SC5314	2155364	2155635	MSPC_Peak_47;ID=orf19.7583;Name=orf19.7583;Peak-2152180-2154225;Summit-2155480-2155481;Dist--1256	40	-	orf19.7583
Ca21chrR_C_albicans_SC5314	2159707	2160071	MSPC_Peak_34;ID=orf19.7586;Name=orf19.7586;Peak-2161835-2163538;Summit-2159840-2159872;Dist--1964	inf	+	orf19.7586
Ca21chrR_C_albicans_SC5314	2167290	2168065	MSPC_Peak_31;ID=orf19.7590;Name=orf19.7590;Peak-2165996-2168158;Summit-2167784-2167785;Dist-0	63	+	orf19.7590
Ca21chrR_C_albicans_SC5314	2168673	2169604	MSPC_Peak_26;ID=orf19.7592;Name=orf19.7592;Peak-2172618-2174708;Summit-2169035-2169040;Dist--3579	inf	+	orf19.7592
Ca21chrR_C_albicans_SC5314	2172646	2173861	MSPC_Peak_22;ID=orf19.7592;Name=orf19.7592;Peak-2172618-2174708;Summit-2173848-2173849;Dist-0	18	+	orf19.7592
Ca21chrR_C_albicans_SC5314	2226933	2227332	MSPC_Peak_19;ID=orf19.7622;Name=orf19.7622;Peak-2225714-2226700;Summit-2227156-2227157;Dist--457	75	-	orf19.7622
Ca21chrR_C_albicans_SC5314	2230749	2231208	MSPC_Peak_15;ID=orf19.7626;Name=orf19.7626;Peak-2230355-2230984;Summit-2230893-2230894;Dist-0	34	+	orf19.7626
Ca21chrR_C_albicans_SC5314	2243524	2243966	MSPC_Peak_10;ID=orf19.7638;Name=orf19.7638;Peak-2245865-2247136;Summit-2243616-2243617;Dist--2249	85.664	+	orf19.7638
Ca21chrR_C_albicans_SC5314	2243524	2243966	MSPC_Peak_10;ID=orf19.7638;Name=orf19.7638;Peak-2245865-2247136;Summit-2243716-2243719;Dist--2147	85.664	+	orf19.7638
Ca21chrR_C_albicans_SC5314	2249403	2249812	MSPC_Peak_6;ID=orf19.7642;Name=orf19.7642;Peak-2247207-2249612;Summit-2249561-2249562;Dist-0	59	+	orf19.7642
Ca21chrR_C_albicans_SC5314	2267367	2267770	MSPC_Peak_2;ID=orf19.7660;Name=orf19.7660;Peak-2267538-2269109;Summit-2267548-2267549;Dist-0	91	-	orf19.7660

## Sheet: 2
Ca19-mtDNA	56	4244	MSPC_Peak_17;ID=CaalfMr16;Name=CaalfMr16;Peak-18-3148;Summit-795-804;Dist-0	inf	+
Ca19-mtDNA	6127	7252	MSPC_Peak_15;ID=CaalfMt21;Name=CaalfMt21;Peak-11525-11606;Summit-6337-6338;Dist--5188	inf	+
Ca19-mtDNA	6127	7252	MSPC_Peak_15;ID=CaalfMt21;Name=CaalfMt21;Peak-11525-11606;Summit-7041-7042;Dist--4484	inf	+
Ca19-mtDNA	7587	7915	MSPC_Peak_12;ID=CaalfMt21;Name=CaalfMt21;Peak-11525-11606;Summit-7739-7740;Dist--3786	inf	+
Ca19-mtDNA	8258	9191	MSPC_Peak_9;ID=CaalfMt21;Name=CaalfMt21;Peak-11525-11606;Summit-8760-8761;Dist--2765	inf	+
Ca19-mtDNA	10292	37716	MSPC_Peak_6;ID=CaalfMp06;Name=CaalfMp06;Peak-12895-13635;Summit-13629-13630;Dist-0	inf	-
Ca19-mtDNA	10292	37716	MSPC_Peak_6;ID=CaalfMp06;Name=CaalfMp06;Peak-12895-13635;Summit-13660-13661;Dist--26	inf	-
Ca19-mtDNA	10292	37716	MSPC_Peak_6;ID=CaalfMp08.4;Name=CaalfMp08.4;Peak-14771-20120;Summit-16981-16982;Dist-0	inf	+
Ca19-mtDNA	10292	37716	MSPC_Peak_6;ID=CaalfMp08.4;Name=CaalfMp08.4;Peak-14771-20120;Summit-17764-17765;Dist-0	inf	+
Ca19-mtDNA	10292	37716	MSPC_Peak_6;ID=CaalfMp08.4;Name=CaalfMp08.4;Peak-14771-20120;Summit-18776-18777;Dist-0	inf	+
Ca19-mtDNA	10292	37716	MSPC_Peak_6;ID=CaalfMt30;Name=CaalfMt30;Peak-21066-21136;Summit-21001-21010;Dist--57	inf	+
Ca19-mtDNA	10292	37716	MSPC_Peak_6;ID=CaalfMp11;Name=CaalfMp11;Peak-23997-26808;Summit-26182-26183;Dist-0	inf	+
Ca19-mtDNA	10292	37716	MSPC_Peak_6;ID=CaalfMr17;Name=CaalfMr17;Peak-27022-28483;Summit-27792-27793;Dist-0	inf	+
Ca19-mtDNA	10292	37716	MSPC_Peak_6;ID=CaalfMr17;Name=CaalfMr17;Peak-27022-28483;Summit-27831-27848;Dist-0	inf	+
Ca19-mtDNA	10292	37716	MSPC_Peak_6;ID=CaalfMp12;Name=CaalfMp12;Peak-29570-29824;Summit-29513-29524;Dist--47	inf	+
Ca19-mtDNA	10292	37716	MSPC_Peak_6;ID=CaalfMt39;Name=CaalfMt39;Peak-31925-32005;Summit-31812-31813;Dist--113	inf	+
Ca19-mtDNA	10292	37716	MSPC_Peak_6;ID=CaalfMt47;Name=CaalfMt47;Peak-35111-35182;Summit-33995-33996;Dist--1116	inf	+
Ca19-mtDNA	38009	40292	MSPC_Peak_3;ID=CaalfMt46;Name=CaalfMt46;Peak-34354-34435;Summit-38214-38215;Dist--3780	inf	-
Ca19-mtDNA	38009	40292	MSPC_Peak_3;ID=CaalfMt46;Name=CaalfMt46;Peak-34354-34435;Summit-38931-38932;Dist--4497	inf	-
Ca19-mtDNA	38009	40292	MSPC_Peak_3;ID=CaalfMt46;Name=CaalfMt46;Peak-34354-34435;Summit-39617-39618;Dist--5183	inf	-
Ca21chr1_C_albicans_SC5314	5591	6273	MSPC_Peak_1339;ID=orf19.6114;Name=orf19.6114;Peak-4409-4720;Summit-5709-5710;Dist--990	144	-
Ca21chr1_C_albicans_SC5314	13234	13839	MSPC_Peak_1338;ID=orf19.6109;Name=orf19.6109;Peak-12163-13701;Summit-13352-13353;Dist-0	20	+
Ca21chr1_C_albicans_SC5314	31660	32905	MSPC_Peak_1337;ID=orf19.6090;Name=orf19.6090;Peak-28286-29488;Summit-32473-32497;Dist--2986	inf	-
Ca21chr1_C_albicans_SC5314	34759	35080	MSPC_Peak_1336;ID=orf19.6082;Name=orf19.6082;Peak-34525-35679;Summit-34930-34931;Dist-0	53	-
Ca21chr1_C_albicans_SC5314	37035	37757	MSPC_Peak_1335;ID=orf19.6081;Name=orf19.6081;Peak-37852-39486;Summit-37372-37380;Dist--473	inf	+
Ca21chr1_C_albicans_SC5314	37035	37757	MSPC_Peak_1335;ID=orf19.6081;Name=orf19.6081;Peak-37852-39486;Summit-37410-37411;Dist--442	inf	+
Ca21chr1_C_albicans_SC5314	42305	43441	MSPC_Peak_1334;ID=orf19.6079;Name=orf19.6079;Peak-42606-43505;Summit-42853-42854;Dist-0	98	+
Ca21chr1_C_albicans_SC5314	43895	46031	MSPC_Peak_1333;ID=orf19.6078;Name=orf19.6078;Peak-43804-45765;Summit-44221-44222;Dist-0	217.295	+
Ca21chr1_C_albicans_SC5314	43895	46031	MSPC_Peak_1333;ID=orf19.6078;Name=orf19.6078;Peak-43804-45765;Summit-44340-44341;Dist-0	217.295	+
Ca21chr1_C_albicans_SC5314	50539	51725	MSPC_Peak_1332;ID=orf19.6073;Name=orf19.6073;Peak-50807-51682;Summit-50898-50918;Dist-0	inf	-
Ca21chr1_C_albicans_SC5314	54757	55404	MSPC_Peak_1331;ID=orf19.6071;Name=orf19.6071;Peak-54838-57075;Summit-54930-54931;Dist-0	167.406	-
Ca21chr1_C_albicans_SC5314	54757	55404	MSPC_Peak_1331;ID=orf19.6071;Name=orf19.6071;Peak-54838-57075;Summit-55140-55141;Dist-0	167.406	-
Ca21chr1_C_albicans_SC5314	59252	62722	MSPC_Peak_1330;ID=orf19.6070;Name=orf19.6070;Peak-59350-62553;Summit-61758-61759;Dist-0	244	+
Ca21chr1_C_albicans_SC5314	72385	72826	MSPC_Peak_1329;ID=orf19.6062;Name=orf19.6062;Peak-73581-73901;Summit-72616-72617;Dist--965	62	+
Ca21chr1_C_albicans_SC5314	95503	96655	MSPC_Peak_1328;ID=orf19.6047;Name=orf19.6047;Peak-95215-96495;Summit-96202-96203;Dist-0	85	+
Ca21chr1_C_albicans_SC5314	102633	103557	MSPC_Peak_1327;ID=orf19.6045;Name=orf19.6045;Peak-101752-103524;Summit-103382-103393;Dist-0	148.458	+
Ca21chr1_C_albicans_SC5314	114343	114734	MSPC_Peak_1326;ID=orf19.6038;Name=orf19.6038;Peak-114128-115879;Summit-114451-114452;Dist-0	62	-
Ca21chr1_C_albicans_SC5314	116224	116481	MSPC_Peak_1325;ID=orf19.6038;Name=orf19.6038;Peak-114128-115879;Summit-116361-116382;Dist--483	130.513	-
Ca21chr1_C_albicans_SC5314	117252	119590	MSPC_Peak_1324;ID=orf19.6037;Name=orf19.6037;Peak-117320-119443;Summit-118708-118709;Dist-0	inf	+
Ca21chr1_C_albicans_SC5314	117252	119590	MSPC_Peak_1324;ID=orf19.6037;Name=orf19.6037;Peak-117320-119443;Summit-119358-119359;Dist-0	inf	+
Ca21chr1_C_albicans_SC5314	123890	125018	MSPC_Peak_1323;ID=orf19.6034;Name=orf19.6034;Peak-123869-125597;Summit-124732-124733;Dist-0	132.506	-
Ca21chr1_C_albicans_SC5314	123890	125018	MSPC_Peak_1323;ID=orf19.6034;Name=orf19.6034;Peak-123869-125597;Summit-124828-124829;Dist-0	132.506	-
Ca21chr1_C_albicans_SC5314	126365	126819	MSPC_Peak_1322;ID=tP(UGG)3;Name=tP(UGG)3;Peak-126521-126612;Summit-126545-126573;Dist-0	inf	+
Ca21chr1_C_albicans_SC5314	138242	141585	MSPC_Peak_1321;ID=orf19.6028;Name=orf19.6028;Peak-138579-140936;Summit-141054-141055;Dist--119	inf	-
Ca21chr1_C_albicans_SC5314	138242	141585	MSPC_Peak_1321;ID=orf19.6028;Name=orf19.6028;Peak-138579-140936;Summit-141148-141159;Dist--213	inf	-
Ca21chr1_C_albicans_SC5314	141853	142272	MSPC_Peak_1320;ID=orf19.6028;Name=orf19.6028;Peak-138579-140936;Summit-142124-142133;Dist--1189	inf	-
Ca21chr1_C_albicans_SC5314	141853	142272	MSPC_Peak_1320;ID=orf19.6028;Name=orf19.6028;Peak-138579-140936;Summit-142171-142172;Dist--1236	inf	-
Ca21chr1_C_albicans_SC5314	142587	143854	MSPC_Peak_1319;ID=orf19.6028;Name=orf19.6028;Peak-138579-140936;Summit-142919-142939;Dist--1984	inf	-
Ca21chr1_C_albicans_SC5314	144535	145868	MSPC_Peak_1318;ID=orf19.6028;Name=orf19.6028;Peak-138579-140936;Summit-145255-145280;Dist--4320	inf	-
Ca21chr1_C_albicans_SC5314	146404	147764	MSPC_Peak_1317;ID=orf19.6027;Name=orf19.6027;Peak-150614-151714;Summit-146717-146735;Dist--3880	inf	+
Ca21chr1_C_albicans_SC5314	151805	152903	MSPC_Peak_1316;ID=orf19.6025;Name=orf19.6025;Peak-155448-156329;Summit-151987-152016;Dist--3433	inf	+
Ca21chr1_C_albicans_SC5314	153474	153990	MSPC_Peak_1315;ID=orf19.6025;Name=orf19.6025;Peak-155448-156329;Summit-153849-153850;Dist--1599	47	+
Ca21chr1_C_albicans_SC5314	187449	187920	MSPC_Peak_1314;ID=orf19.6011;Name=orf19.6011;Peak-185514-190152;Summit-187516-187517;Dist-0	58.849	-
Ca21chr1_C_albicans_SC5314	187449	187920	MSPC_Peak_1314;ID=orf19.6011;Name=orf19.6011;Peak-185514-190152;Summit-187836-187837;Dist-0	58.849	-
Ca21chr1_C_albicans_SC5314	191217	192918	MSPC_Peak_1313;ID=orf19.6010;Name=orf19.6010;Peak-191450-193411;Summit-191597-191617;Dist-0	286.176	-
Ca21chr1_C_albicans_SC5314	204776	205197	MSPC_Peak_1312;ID=tA(AGC)4;Name=tA(AGC)4;Peak-204992-205064;Summit-205016-205033;Dist-0	inf	+
Ca21chr1_C_albicans_SC5314	208510	208905	MSPC_Peak_1311;ID=orf19.3294;Name=orf19.3294;Peak-208292-208747;Summit-208673-208674;Dist-0	77	+
Ca21chr1_C_albicans_SC5314	227632	229433	MSPC_Peak_1310;ID=orf19.3302;Name=orf19.3302;Peak-227686-229788;Summit-228534-228535;Dist-0	115.564	-
Ca21chr1_C_albicans_SC5314	227632	229433	MSPC_Peak_1310;ID=orf19.3302;Name=orf19.3302;Peak-227686-229788;Summit-228666-228667;Dist-0	115.564	-
Ca21chr1_C_albicans_SC5314	231515	231850	MSPC_Peak_1309;ID=orf19.3302;Name=orf19.3302;Peak-227686-229788;Summit-231649-231670;Dist--1862	174.069	-
Ca21chr1_C_albicans_SC5314	231515	231850	MSPC_Peak_1309;ID=orf19.3302;Name=orf19.3302;Peak-227686-229788;Summit-231691-231692;Dist--1904	174.069	-
Ca21chr1_C_albicans_SC5314	251334	252191	MSPC_Peak_1308;ID=orf19.3312;Name=orf19.3312;Peak-250112-251986;Summit-251644-251649;Dist-0	131.509	+
Ca21chr1_C_albicans_SC5314	254118	254599	MSPC_Peak_1307;ID=orf19.3314;Name=orf19.3314;Peak-252045-252497;Summit-254464-254465;Dist--1968	58	-
Ca21chr1_C_albicans_SC5314	263306	264366	MSPC_Peak_1306;ID=orf19.3323;Name=orf19.3323;Peak-262226-263092;Summit-263454-263455;Dist--363	110.583	-
Ca21chr1_C_albicans_SC5314	263306	264366	MSPC_Peak_1306;ID=orf19.3324;Name=orf19.3324;Peak-263488-264681;Summit-263752-263753;Dist-0	110.583	-
Ca21chr1_C_albicans_SC5314	265158	265699	MSPC_Peak_1305;ID=orf19.3325;Name=orf19.3325;Peak-265492-267474;Summit-265663-265664;Dist-0	48	-
Ca21chr1_C_albicans_SC5314	268927	270069	MSPC_Peak_1304;ID=orf19.3325;Name=orf19.3325;Peak-265492-267474;Summit-269197-269198;Dist--1724	inf	-
Ca21chr1_C_albicans_SC5314	268927	270069	MSPC_Peak_1304;ID=orf19.3325.3;Name=orf19.3325.3;Peak-269382-270022;Summit-269426-269441;Dist-0	inf	-
Ca21chr1_C_albicans_SC5314	275007	275439	MSPC_Peak_1303;ID=orf19.3328;Name=orf19.3328;Peak-272385-274208;Summit-275209-275218;Dist--1002	inf	-
Ca21chr1_C_albicans_SC5314	275007	275439	MSPC_Peak_1303;ID=orf19.3328;Name=orf19.3328;Peak-272385-274208;Summit-275241-275242;Dist--1034	inf	-
Ca21chr1_C_albicans_SC5314	279766	280375	MSPC_Peak_1302;ID=orf19.3330;Name=orf19.3330;Peak-278233-279273;Summit-280192-280202;Dist--920	inf	-
Ca21chr1_C_albicans_SC5314	283169	284460	MSPC_Peak_1301;ID=orf19.3331;Name=orf19.3331;Peak-282448-284148;Summit-283920-283921;Dist-0	231.268	+
Ca21chr1_C_albicans_SC5314	283169	284460	MSPC_Peak_1301;ID=orf19.3331;Name=orf19.3331;Peak-282448-284148;Summit-283943-283944;Dist-0	231.268	+
Ca21chr1_C_albicans_SC5314	290208	290479	MSPC_Peak_1300;ID=orf19.3334;Name=orf19.3334;Peak-289712-290461;Summit-290208-290209;Dist-0	15	-
Ca21chr1_C_albicans_SC5314	293853	294122	MSPC_Peak_1299;ID=orf19.3336;Name=orf19.3336;Peak-296059-296517;Summit-293978-293992;Dist--2068	inf	+
Ca21chr1_C_albicans_SC5314	298491	299215	MSPC_Peak_1298;ID=orf19.3337;Name=orf19.3337;Peak-299627-301779;Summit-298989-298994;Dist--634	inf	+
Ca21chr1_C_albicans_SC5314	298491	299215	MSPC_Peak_1298;ID=orf19.3337;Name=orf19.3337;Peak-299627-301779;Summit-299040-299041;Dist--587	inf	+
Ca21chr1_C_albicans_SC5314	302440	303011	MSPC_Peak_1297;ID=orf19.3342;Name=orf19.3342;Peak-309137-310987;Summit-302723-302729;Dist--6409	inf	+
Ca21chr1_C_albicans_SC5314	302440	303011	MSPC_Peak_1297;ID=orf19.3342;Name=orf19.3342;Peak-309137-310987;Summit-302782-302783;Dist--6355	inf	+
Ca21chr1_C_albicans_SC5314	331309	334214	MSPC_Peak_1296;ID=orf19.3354;Name=orf19.3354;Peak-332739-334096;Summit-333030-333031;Dist-0	inf	+
Ca21chr1_C_albicans_SC5314	331309	334214	MSPC_Peak_1296;ID=orf19.3354;Name=orf19.3354;Peak-332739-334096;Summit-333052-333057;Dist-0	inf	+
Ca21chr1_C_albicans_SC5314	335682	336296	MSPC_Peak_1295;ID=tS(UGA)1;Name=tS(UGA)1;Peak-336138-336219;Summit-336164-336165;Dist-0	188	-
Ca21chr1_C_albicans_SC5314	343679	343955	MSPC_Peak_1294;ID=orf19.3358;Name=orf19.3358;Peak-342949-343920;Summit-343689-343690;Dist-0	19	-
Ca21chr1_C_albicans_SC5314	348413	348902	MSPC_Peak_1293;ID=orf19.3359;Name=orf19.3359;Peak-345579-348779;Summit-348631-348632;Dist-0	52	+
Ca21chr1_C_albicans_SC5314	349415	349833	MSPC_Peak_1292;ID=orf19.3360;Name=orf19.3360;Peak-351115-353118;Summit-349596-349597;Dist--1519	290	+
Ca21chr1_C_albicans_SC5314	351647	352248	MSPC_Peak_1291;ID=orf19.3360;Name=orf19.3360;Peak-351115-353118;Summit-351716-351717;Dist-0	29	+
Ca21chr1_C_albicans_SC5314	367744	369312	MSPC_Peak_1290;ID=orf19.4546;Name=orf19.4546;Peak-367950-369824;Summit-368023-368024;Dist-0	149.455	-
Ca21chr1_C_albicans_SC5314	367744	369312	MSPC_Peak_1290;ID=orf19.4546;Name=orf19.4546;Peak-367950-369824;Summit-368922-368923;Dist-0	149.455	-
Ca21chr1_C_albicans_SC5314	384669	384950	MSPC_Peak_1289;ID=orf19.4538;Name=orf19.4538;Peak-382776-383606;Summit-384731-384732;Dist--1126	43	-
Ca21chr1_C_albicans_SC5314	405063	408723	MSPC_Peak_1288;ID=orf19.4528.1;Name=orf19.4528.1;Peak-405767-406045;Summit-405496-405497;Dist--271	inf	+
Ca21chr1_C_albicans_SC5314	405063	408723	MSPC_Peak_1288;ID=orf19.4528.1;Name=orf19.4528.1;Peak-405767-406045;Summit-405532-405533;Dist--235	inf	+
Ca21chr1_C_albicans_SC5314	405063	408723	MSPC_Peak_1288;ID=orf19.4527;Name=orf19.4527;Peak-406691-408328;Summit-407008-407009;Dist-0	inf	+
Ca21chr1_C_albicans_SC5314	405063	408723	MSPC_Peak_1288;ID=orf19.4527;Name=orf19.4527;Peak-406691-408328;Summit-408176-408177;Dist-0	inf	+
Ca21chr1_C_albicans_SC5314	442067	444645	MSPC_Peak_1287;ID=orf19.3669;Name=orf19.3669;Peak-442472-444259;Summit-442519-442520;Dist-0	inf	-
Ca21chr1_C_albicans_SC5314	442067	444645	MSPC_Peak_1287;ID=orf19.3669;Name=orf19.3669;Peak-442472-444259;Summit-443205-443206;Dist-0	inf	-
Ca21chr1_C_albicans_SC5314	445590	446595	MSPC_Peak_1286;ID=orf19.3669;Name=orf19.3669;Peak-442472-444259;Summit-445737-445738;Dist--1479	172	-
Ca21chr1_C_albicans_SC5314	446846	447357	MSPC_Peak_1285;ID=orf19.3669;Name=orf19.3669;Peak-442472-444259;Summit-447035-447036;Dist--2777	125	-
Ca21chr1_C_albicans_SC5314	448833	454357	MSPC_Peak_1284;ID=orf19.3671;Name=orf19.3671;Peak-451304-451648;Summit-451457-451472;Dist-0	inf	-
Ca21chr1_C_albicans_SC5314	448833	454357	MSPC_Peak_1284;ID=orf19.3672;Name=orf19.3672;Peak-452186-454213;Summit-453982-453983;Dist-0	inf	+
Ca21chr1_C_albicans_SC5314	455947	456550	MSPC_Peak_1283;ID=orf19.3674;Name=orf19.3674;Peak-454883-455845;Summit-456277-456291;Dist--433	inf	-
Ca21chr1_C_albicans_SC5314	455947	456550	MSPC_Peak_1283;ID=orf19.3675;Name=orf19.3675;Peak-456773-457933;Summit-456312-456313;Dist--461	inf	+
Ca21chr1_C_albicans_SC5314	456789	458151	MSPC_Peak_1282;ID=orf19.3675;Name=orf19.3675;Peak-456773-457933;Summit-457362-457363;Dist-0	inf	+
Ca21chr1_C_albicans_SC5314	456789	458151	MSPC_Peak_1282;ID=orf19.3675;Name=orf19.3675;Peak-456773-457933;Summit-457836-457837;Dist-0	inf	+
Ca21chr1_C_albicans_SC5314	462351	462975	MSPC_Peak_1281;ID=orf19.3678;Name=orf19.3678;Peak-461092-462807;Summit-462710-462711;Dist-0	100.623	+
Ca21chr1_C_albicans_SC5314	462351	462975	MSPC_Peak_1281;ID=orf19.3678;Name=orf19.3678;Peak-461092-462807;Summit-462752-462753;Dist-0	100.623	+
Ca21chr1_C_albicans_SC5314	464339	464569	MSPC_Peak_1280;ID=orf19.3679;Name=orf19.3679;Peak-462874-463884;Summit-464441-464442;Dist--558	62	-
Ca21chr1_C_albicans_SC5314	467717	468090	MSPC_Peak_1279;ID=orf19.3681;Name=orf19.3681;Peak-469144-471771;Summit-467973-467974;Dist--1171	182.37	+
Ca21chr1_C_albicans_SC5314	467717	468090	MSPC_Peak_1279;ID=orf19.3681;Name=orf19.3681;Peak-469144-471771;Summit-468020-468021;Dist--1124	182.37	+
Ca21chr1_C_albicans_SC5314	474917	476095	MSPC_Peak_1278;ID=orf19.3682;Name=orf19.3682;Peak-474954-475679;Summit-475468-475469;Dist-0	inf	+
Ca21chr1_C_albicans_SC5314	474917	476095	MSPC_Peak_1278;ID=orf19.3687;Name=orf19.3687;Peak-483733-484098;Summit-475719-475720;Dist--8014	inf	+
Ca21chr1_C_albicans_SC5314	486897	489067	MSPC_Peak_1277;ID=orf19.3690.2;Name=orf19.3690.2;Peak-487383-488232;Summit-487432-487447;Dist-0	inf	-
Ca21chr1_C_albicans_SC5314	486897	489067	MSPC_Peak_1277;ID=tR(CCG)1;Name=tR(CCG)1;Peak-488682-488786;Summit-488730-488745;Dist-0	inf	-
Ca21chr1_C_albicans_SC5314	486897	489067	MSPC_Peak_1277;ID=tR(CCG)1;Name=tR(CCG)1;Peak-488682-488786;Summit-488770-488771;Dist-0	inf	-
Ca21chr1_C_albicans_SC5314	505940	511540	MSPC_Peak_1276;ID=orf19.2929;Name=orf19.2929;Peak-506007-511700;Summit-506303-506304;Dist-0	inf	-
Ca21chr1_C_albicans_SC5314	505940	511540	MSPC_Peak_1276;ID=orf19.2929;Name=orf19.2929;Peak-506007-511700;Summit-508556-508557;Dist-0	inf	-
Ca21chr1_C_albicans_SC5314	505940	511540	MSPC_Peak_1276;ID=orf19.2929;Name=orf19.2929;Peak-506007-511700;Summit-509533-509534;Dist-0	inf	-
Ca21chr1_C_albicans_SC5314	513404	514290	MSPC_Peak_1275;ID=orf19.2929;Name=orf19.2929;Peak-506007-511700;Summit-513571-513580;Dist--1872	inf	-
Ca21chr1_C_albicans_SC5314	514801	515263	MSPC_Peak_1274;ID=orf19.2929;Name=orf19.2929;Peak-506007-511700;Summit-514975-514999;Dist--3276	inf	-
Ca21chr1_C_albicans_SC5314	520891	522262	MSPC_Peak_1273;ID=orf19.2935;Name=orf19.2935;Peak-521342-522004;Summit-521237-521238;Dist--105	inf	+
Ca21chr1_C_albicans_SC5314	520891	522262	MSPC_Peak_1273;ID=orf19.2935;Name=orf19.2935;Peak-521342-522004;Summit-521723-521724;Dist-0	inf	+
Ca21chr1_C_albicans_SC5314	520891	522262	MSPC_Peak_1273;ID=orf19.2935;Name=orf19.2935;Peak-521342-522004;Summit-521811-521812;Dist-0	inf	+
Ca21chr1_C_albicans_SC5314	520891	522262	MSPC_Peak_1273;ID=orf19.2935;Name=orf19.2935;Peak-521342-522004;Summit-521858-521859;Dist-0	inf	+
Ca21chr1_C_albicans_SC5314	532841	533270	MSPC_Peak_1272;ID=orf19.2942;Name=orf19.2942;Peak-532457-534217;Summit-532938-532939;Dist-0	55.871	-
Ca21chr1_C_albicans_SC5314	532841	533270	MSPC_Peak_1272;ID=orf19.2942;Name=orf19.2942;Peak-532457-534217;Summit-533070-533071;Dist-0	55.871	-
Ca21chr1_C_albicans_SC5314	535821	537056	MSPC_Peak_1271;ID=orf19.2943.5;Name=orf19.2943.5;Peak-536985-537284;Summit-536876-536899;Dist--87	inf	+
Ca21chr1_C_albicans_SC5314	541468	542737	MSPC_Peak_1270;ID=orf19.2947;Name=orf19.2947;Peak-541779-542657;Summit-542161-542162;Dist-0	inf	-
Ca21chr1_C_albicans_SC5314	541468	542737	MSPC_Peak_1270;ID=orf19.2947;Name=orf19.2947;Peak-541779-542657;Summit-542303-542304;Dist-0	inf	-
Ca21chr1_C_albicans_SC5314	541468	542737	MSPC_Peak_1270;ID=orf19.2947;Name=orf19.2947;Peak-541779-542657;Summit-542380-542381;Dist-0	inf	-
Ca21chr1_C_albicans_SC5314	564040	564504	MSPC_Peak_1269;ID=orf19.2960;Name=orf19.2960;Peak-565743-567233;Summit-564272-564284;Dist--1460	inf	+
Ca21chr1_C_albicans_SC5314	564040	564504	MSPC_Peak_1269;ID=orf19.2959.1;Name=orf19.2959.1;Peak-564315-564488;Summit-564341-564342;Dist-0	inf	-
Ca21chr1_C_albicans_SC5314	630329	630668	MSPC_Peak_1268;ID=orf19.2994.1;Name=orf19.2994.1;Peak-632142-632897;Summit-630593-630594;Dist--1549	42	+
Ca21chr1_C_albicans_SC5314	631064	631671	MSPC_Peak_1267;ID=orf19.2994.1;Name=orf19.2994.1;Peak-632142-632897;Summit-631067-631068;Dist--1075	17	+
Ca21chr1_C_albicans_SC5314	632125	633309	MSPC_Peak_1266;ID=orf19.2994.1;Name=orf19.2994.1;Peak-632142-632897;Summit-632716-632717;Dist-0	inf	+
Ca21chr1_C_albicans_SC5314	632125	633309	MSPC_Peak_1266;ID=orf19.2994.1;Name=orf19.2994.1;Peak-632142-632897;Summit-632756-632757;Dist-0	inf	+
Ca21chr1_C_albicans_SC5314	632125	633309	MSPC_Peak_1266;ID=orf19.2994.1;Name=orf19.2994.1;Peak-632142-632897;Summit-632845-632846;Dist-0	inf	+
Ca21chr1_C_albicans_SC5314	643216	644490	MSPC_Peak_1265;ID=orf19.3002;Name=orf19.3002;Peak-643289-644059;Summit-643919-643920;Dist-0	inf	+
Ca21chr1_C_albicans_SC5314	643216	644490	MSPC_Peak_1265;ID=orf19.3002;Name=orf19.3002;Peak-643289-644059;Summit-643954-643955;Dist-0	inf	+
Ca21chr1_C_albicans_SC5314	643216	644490	MSPC_Peak_1265;ID=orf19.3002;Name=orf19.3002;Peak-643289-644059;Summit-644003-644004;Dist-0	inf	+
Ca21chr1_C_albicans_SC5314	650071	651541	MSPC_Peak_1264;ID=orf19.3003.1;Name=orf19.3003.1;Peak-650129-651021;Summit-650889-650890;Dist-0	inf	+
Ca21chr1_C_albicans_SC5314	650071	651541	MSPC_Peak_1264;ID=orf19.3003.1;Name=orf19.3003.1;Peak-650129-651021;Summit-650993-650994;Dist-0	inf	+
Ca21chr1_C_albicans_SC5314	650071	651541	MSPC_Peak_1264;ID=orf19.3004;Name=orf19.3004;Peak-651967-653199;Summit-651202-651203;Dist--765	inf	+
Ca21chr1_C_albicans_SC5314	662704	664442	MSPC_Peak_1263;ID=orf19.3010.1;Name=orf19.3010.1;Peak-662242-664402;Summit-662804-662824;Dist-0	179.045	-
Ca21chr1_C_albicans_SC5314	662704	664442	MSPC_Peak_1263;ID=orf19.3010.1;Name=orf19.3010.1;Peak-662242-664402;Summit-663982-663983;Dist-0	179.045	-
Ca21chr1_C_albicans_SC5314	664675	665661	MSPC_Peak_1262;ID=orf19.3010.1;Name=orf19.3010.1;Peak-662242-664402;Summit-664854-664860;Dist--453	inf	-
Ca21chr1_C_albicans_SC5314	664675	665661	MSPC_Peak_1262;ID=orf19.3010.1;Name=orf19.3010.1;Peak-662242-664402;Summit-665470-665471;Dist--1069	inf	-
Ca21chr1_C_albicans_SC5314	666030	666921	MSPC_Peak_1261;ID=orf19.3010.1;Name=orf19.3010.1;Peak-662242-664402;Summit-666661-666680;Dist--2260	inf	-
Ca21chr1_C_albicans_SC5314	674271	676816	MSPC_Peak_1260;ID=orf19.3013;Name=orf19.3013;Peak-672554-673909;Summit-674516-674517;Dist--608	inf	-
Ca21chr1_C_albicans_SC5314	674271	676816	MSPC_Peak_1260;ID=orf19.3014;Name=orf19.3014;Peak-675145-675939;Summit-675351-675352;Dist-0	inf	-
Ca21chr1_C_albicans_SC5314	674271	676816	MSPC_Peak_1260;ID=orf19.3014;Name=orf19.3014;Peak-675145-675939;Summit-675479-675480;Dist-0	inf	-
Ca21chr1_C_albicans_SC5314	674271	676816	MSPC_Peak_1260;ID=orf19.3014;Name=orf19.3014;Peak-675145-675939;Summit-675770-675771;Dist-0	inf	-
Ca21chr1_C_albicans_SC5314	674271	676816	MSPC_Peak_1260;ID=orf19.3014;Name=orf19.3014;Peak-675145-675939;Summit-676191-676192;Dist--253	inf	-
Ca21chr1_C_albicans_SC5314	700506	701235	MSPC_Peak_1259;ID=orf19.3035;Name=orf19.3035;Peak-701786-706018;Summit-700836-700837;Dist--950	306.587	+
Ca21chr1_C_albicans_SC5314	700506	701235	MSPC_Peak_1259;ID=orf19.3035;Name=orf19.3035;Peak-701786-706018;Summit-700898-700899;Dist--888	306.587	+
Ca21chr1_C_albicans_SC5314	700506	701235	MSPC_Peak_1259;ID=orf19.3035;Name=orf19.3035;Peak-701786-706018;Summit-701004-701005;Dist--782	306.587	+
Ca21chr1_C_albicans_SC5314	708405	708803	MSPC_Peak_1258;ID=orf19.3038;Name=orf19.3038;Peak-709532-712198;Summit-708466-708467;Dist--1066	28	+
Ca21chr1_C_albicans_SC5314	709477	712800	MSPC_Peak_1257;ID=orf19.3038;Name=orf19.3038;Peak-709532-712198;Summit-709767-709768;Dist-0	79.724	+
Ca21chr1_C_albicans_SC5314	709477	712800	MSPC_Peak_1257;ID=orf19.3038;Name=orf19.3038;Peak-709532-712198;Summit-710508-710509;Dist-0	79.724	+
Ca21chr1_C_albicans_SC5314	709477	712800	MSPC_Peak_1257;ID=orf19.3038;Name=orf19.3038;Peak-709532-712198;Summit-711947-711948;Dist-0	79.724	+
Ca21chr1_C_albicans_SC5314	719079	719526	MSPC_Peak_1256;ID=tN(GUU)3;Name=tN(GUU)3;Peak-719276-719380;Summit-719340-719349;Dist-0	inf	+
Ca21chr1_C_albicans_SC5314	738811	739374	MSPC_Peak_1255;ID=orf19.3054;Name=orf19.3054;Peak-740662-742107;Summit-739153-739154;Dist--1509	124.532	+
Ca21chr1_C_albicans_SC5314	738811	739374	MSPC_Peak_1255;ID=orf19.3054;Name=orf19.3054;Peak-740662-742107;Summit-739179-739180;Dist--1483	124.532	+
Ca21chr1_C_albicans_SC5314	746795	747420	MSPC_Peak_1254;ID=orf19.3059;Name=orf19.3059;Peak-746794-747828;Summit-747288-747289;Dist-0	41	-
Ca21chr1_C_albicans_SC5314	748088	748549	MSPC_Peak_1253;ID=tL(UAA)3;Name=tL(UAA)3;Peak-748300-748415;Summit-748313-748314;Dist-0	inf	-
Ca21chr1_C_albicans_SC5314	748088	748549	MSPC_Peak_1253;ID=tL(UAA)3;Name=tL(UAA)3;Peak-748300-748415;Summit-748344-748346;Dist-0	inf	-
Ca21chr1_C_albicans_SC5314	751343	752581	MSPC_Peak_1252;ID=orf19.3061.1;Name=orf19.3061.1;Peak-751463-752184;Summit-751532-751533;Dist-0	248.765	-
Ca21chr1_C_albicans_SC5314	751343	752581	MSPC_Peak_1252;ID=orf19.3061.1;Name=orf19.3061.1;Peak-751463-752184;Summit-751634-751635;Dist-0	248.765	-
Ca21chr1_C_albicans_SC5314	751343	752581	MSPC_Peak_1252;ID=orf19.3061.1;Name=orf19.3061.1;Peak-751463-752184;Summit-752081-752082;Dist-0	248.765	-
Ca21chr1_C_albicans_SC5314	766497	766964	MSPC_Peak_1251;ID=tT(CGU)1;Name=tT(CGU)1;Peak-766708-766795;Summit-766749-766750;Dist-0	inf	-
Ca21chr1_C_albicans_SC5314	766497	766964	MSPC_Peak_1251;ID=tT(CGU)1;Name=tT(CGU)1;Peak-766708-766795;Summit-766775-766777;Dist-0	inf	-
Ca21chr1_C_albicans_SC5314	772298	772630	MSPC_Peak_1250;ID=orf19.1133;Name=orf19.1133;Peak-767142-771005;Summit-772460-772476;Dist--1456	259.729	-
Ca21chr1_C_albicans_SC5314	817723	818098	MSPC_Peak_1249;ID=orf19.4459;Name=orf19.4459;Peak-813949-815640;Summit-817914-817923;Dist--2275	inf	-
Ca21chr1_C_albicans_SC5314	817723	818098	MSPC_Peak_1249;ID=orf19.4459;Name=orf19.4459;Peak-813949-815640;Summit-817953-817954;Dist--2314	inf	-
Ca21chr1_C_albicans_SC5314	859558	860525	MSPC_Peak_1248;ID=orf19.1042;Name=orf19.1042;Peak-859696-860544;Summit-859779-859780;Dist-0	268.204	-
Ca21chr1_C_albicans_SC5314	859558	860525	MSPC_Peak_1248;ID=orf19.1042;Name=orf19.1042;Peak-859696-860544;Summit-859810-859811;Dist-0	268.204	-
Ca21chr1_C_albicans_SC5314	866960	867372	MSPC_Peak_1247;ID=orf19.1048;Name=orf19.1048;Peak-867455-868489;Summit-867201-867209;Dist--247	inf	+
Ca21chr1_C_albicans_SC5314	870475	871175	MSPC_Peak_1246;ID=orf19.1051;Name=orf19.1051;Peak-870746-871141;Summit-870848-870849;Dist-0	inf	-
Ca21chr1_C_albicans_SC5314	870475	871175	MSPC_Peak_1246;ID=orf19.1051;Name=orf19.1051;Peak-870746-871141;Summit-870972-870973;Dist-0	inf	-
Ca21chr1_C_albicans_SC5314	871955	872704	MSPC_Peak_1245;ID=orf19.1052;Name=orf19.1052;Peak-872008-872400;Summit-872371-872384;Dist-0	inf	+
Ca21chr1_C_albicans_SC5314	876693	876946	MSPC_Peak_1244;ID=orf19.1055;Name=orf19.1055;Peak-876470-877866;Summit-876744-876745;Dist-0	28	-
Ca21chr1_C_albicans_SC5314	880769	881424	MSPC_Peak_1243;ID=orf19.1059;Name=orf19.1059;Peak-881013-881330;Summit-881106-881107;Dist-0	inf	-
Ca21chr1_C_albicans_SC5314	880769	881424	MSPC_Peak_1243;ID=orf19.1059;Name=orf19.1059;Peak-881013-881330;Summit-881156-881157;Dist-0	inf	-
Ca21chr1_C_albicans_SC5314	882211	882947	MSPC_Peak_1242;ID=orf19.1061;Name=orf19.1061;Peak-882239-882649;Summit-882493-882494;Dist-0	171.396	+
Ca21chr1_C_albicans_SC5314	882211	882947	MSPC_Peak_1242;ID=orf19.1061;Name=orf19.1061;Peak-882239-882649;Summit-882625-882626;Dist-0	171.396	+
Ca21chr1_C_albicans_SC5314	885803	888296	MSPC_Peak_1241;ID=orf19.1064;Name=orf19.1064;Peak-886084-889191;Summit-886228-886229;Dist-0	inf	-
Ca21chr1_C_albicans_SC5314	885803	888296	MSPC_Peak_1241;ID=orf19.1064;Name=orf19.1064;Peak-886084-889191;Summit-886484-886485;Dist-0	inf	-
Ca21chr1_C_albicans_SC5314	885803	888296	MSPC_Peak_1241;ID=orf19.1064;Name=orf19.1064;Peak-886084-889191;Summit-887115-887116;Dist-0	inf	-
Ca21chr1_C_albicans_SC5314	892521	893020	MSPC_Peak_1240;ID=orf19.1065;Name=orf19.1065;Peak-890449-892386;Summit-892754-892764;Dist--369	inf	-
Ca21chr1_C_albicans_SC5314	911173	911821	MSPC_Peak_1239;ID=orf19.5197;Name=orf19.5197;Peak-911174-914393;Summit-911220-911221;Dist-0	78.727	-
Ca21chr1_C_albicans_SC5314	911173	911821	MSPC_Peak_1239;ID=orf19.5197;Name=orf19.5197;Peak-911174-914393;Summit-911427-911428;Dist-0	78.727	-
Ca21chr1_C_albicans_SC5314	945477	945852	MSPC_Peak_1238;ID=orf19.6852.1;Name=orf19.6852.1;Peak-946320-946508;Summit-945591-945592;Dist--729	57	+
Ca21chr1_C_albicans_SC5314	946138	947208	MSPC_Peak_1237;ID=orf19.6852.1;Name=orf19.6852.1;Peak-946320-946508;Summit-946488-946489;Dist-0	inf	+
Ca21chr1_C_albicans_SC5314	946138	947208	MSPC_Peak_1237;ID=orf19.6852;Name=orf19.6852;Peak-943709-944536;Summit-946584-946585;Dist--2049	inf	-
Ca21chr1_C_albicans_SC5314	949391	949846	MSPC_Peak_1236;ID=orf19.6854;Name=orf19.6854;Peak-949400-951542;Summit-949782-949783;Dist-0	59	+
Ca21chr1_C_albicans_SC5314	951208	951848	MSPC_Peak_1235;ID=orf19.6854;Name=orf19.6854;Peak-949400-951542;Summit-951243-951244;Dist-0	29	+
Ca21chr1_C_albicans_SC5314	973544	974861	MSPC_Peak_1234;ID=orf19.778;Name=orf19.778;Peak-973551-974477;Summit-973732-973733;Dist-0	inf	+
Ca21chr1_C_albicans_SC5314	973544	974861	MSPC_Peak_1234;ID=orf19.778;Name=orf19.778;Peak-973551-974477;Summit-974397-974398;Dist-0	inf	+
Ca21chr1_C_albicans_SC5314	973544	974861	MSPC_Peak_1234;ID=orf19.778;Name=orf19.778;Peak-973551-974477;Summit-974430-974431;Dist-0	inf	+
Ca21chr1_C_albicans_SC5314	991123	993123	MSPC_Peak_1233;ID=orf19.767;Name=orf19.767;Peak-991691-992851;Summit-991823-991824;Dist-0	inf	-
Ca21chr1_C_albicans_SC5314	991123	993123	MSPC_Peak_1233;ID=orf19.767;Name=orf19.767;Peak-991691-992851;Summit-991858-991859;Dist-0	inf	-
Ca21chr1_C_albicans_SC5314	1028017	1028330	MSPC_Peak_1232;ID=orf19.750;Name=orf19.750;Peak-1023282-1023818;Summit-1028212-1028213;Dist--4395	74	-
Ca21chr1_C_albicans_SC5314	1029906	1030188	MSPC_Peak_1231;ID=orf19.48;Name=orf19.48;Peak-1028341-1032522;Summit-1030055-1030056;Dist-0	28	-
Ca21chr1_C_albicans_SC5314	1030474	1030765	MSPC_Peak_1230;ID=orf19.48;Name=orf19.48;Peak-1028341-1032522;Summit-1030593-1030594;Dist-0	29	-
Ca21chr1_C_albicans_SC5314	1031083	1031756	MSPC_Peak_1229;ID=orf19.48;Name=orf19.48;Peak-1028341-1032522;Summit-1031679-1031680;Dist-0	24	-
Ca21chr1_C_albicans_SC5314	1031929	1032189	MSPC_Peak_1228;ID=orf19.48;Name=orf19.48;Peak-1028341-1032522;Summit-1032025-1032026;Dist-0	39	-
Ca21chr1_C_albicans_SC5314	1054956	1055233	MSPC_Peak_1227;ID=orf19.57;Name=orf19.57;Peak-1054162-1054857;Summit-1055104-1055109;Dist--248	inf	-
Ca21chr1_C_albicans_SC5314	1080014	1091368	MSPC_Peak_1225;ID=orf19.4056;Name=orf19.4056;Peak-1082678-1083949;Summit-1082226-1082240;Dist--439	inf	+
Ca21chr1_C_albicans_SC5314	1080014	1091368	MSPC_Peak_1225;ID=orf19.450;Name=orf19.450;Peak-1085006-1085239;Summit-1086878-1086879;Dist--1640	inf	-
Ca21chr1_C_albicans_SC5314	1080014	1091368	MSPC_Peak_1225;ID=orf19.450;Name=orf19.450;Peak-1085006-1085239;Summit-1089506-1089508;Dist--4268	inf	-
Ca21chr1_C_albicans_SC5314	1092632	1093309	MSPC_Peak_1222;ID=orf19.449;Name=orf19.449;Peak-1092666-1093862;Summit-1092743-1092767;Dist-0	148.205	-
Ca21chr1_C_albicans_SC5314	1093367	1093819	MSPC_Peak_1220;ID=orf19.449;Name=orf19.449;Peak-1092666-1093862;Summit-1093694-1093695;Dist-0	62	-
Ca21chr1_C_albicans_SC5314	1094510	1094875	MSPC_Peak_1218;ID=orf19.449;Name=orf19.449;Peak-1092666-1093862;Summit-1094549-1094550;Dist--688	28	-
Ca21chr1_C_albicans_SC5314	1096390	1096754	MSPC_Peak_1216;ID=orf19.448;Name=orf19.448;Peak-1094731-1096011;Summit-1096652-1096653;Dist--642	101	-
Ca21chr1_C_albicans_SC5314	1112930	1113345	MSPC_Peak_1214;ID=orf19.437;Name=orf19.437;Peak-1111223-1113181;Summit-1113161-1113162;Dist-0	77	+
Ca21chr1_C_albicans_SC5314	1115904	1116376	MSPC_Peak_1212;ID=tP(UGG)1;Name=tP(UGG)1;Peak-1116103-1116195;Summit-1116142-1116164;Dist-0	inf	+
Ca21chr1_C_albicans_SC5314	1160924	1161426	MSPC_Peak_1211;ID=orf19.413.1;Name=orf19.413.1;Peak-1155591-1155839;Summit-1161190-1161191;Dist--5352	101	-
Ca21chr1_C_albicans_SC5314	1163421	1164409	MSPC_Peak_1209;ID=orf19.412;Name=orf19.412;Peak-1161330-1162939;Summit-1163644-1163645;Dist--706	128.519	-
Ca21chr1_C_albicans_SC5314	1163421	1164409	MSPC_Peak_1209;ID=orf19.411;Name=orf19.411;Peak-1163651-1164670;Summit-1164317-1164318;Dist-0	128.519	-
Ca21chr1_C_albicans_SC5314	1165866	1166441	MSPC_Peak_1208;ID=orf19.410.3;Name=orf19.410.3;Peak-1166924-1167627;Summit-1166131-1166148;Dist--777	inf	+
Ca21chr1_C_albicans_SC5314	1167876	1169082	MSPC_Peak_1206;ID=tN(GUU)2;Name=tN(GUU)2;Peak-1168044-1168149;Summit-1168114-1168128;Dist-0	inf	+
Ca21chr1_C_albicans_SC5314	1167876	1169082	MSPC_Peak_1206;ID=tT(AGU)1;Name=tT(AGU)1;Peak-1168890-1168962;Summit-1168942-1168943;Dist-0	inf	+
Ca21chr1_C_albicans_SC5314	1195161	1197244	MSPC_Peak_1205;ID=orf19.2478.1;Name=orf19.2478.1;Peak-1195221-1196758;Summit-1195857-1195858;Dist-0	inf	+
Ca21chr1_C_albicans_SC5314	1195161	1197244	MSPC_Peak_1205;ID=orf19.2478.1;Name=orf19.2478.1;Peak-1195221-1196758;Summit-1196493-1196494;Dist-0	inf	+
Ca21chr1_C_albicans_SC5314	1195161	1197244	MSPC_Peak_1205;ID=orf19.2478.1;Name=orf19.2478.1;Peak-1195221-1196758;Summit-1196541-1196542;Dist-0	inf	+
Ca21chr1_C_albicans_SC5314	1225224	1226126	MSPC_Peak_1203;ID=orf19.2459;Name=orf19.2459;Peak-1226736-1229654;Summit-1225904-1225916;Dist--821	inf	+
Ca21chr1_C_albicans_SC5314	1235004	1235465	MSPC_Peak_1201;ID=orf19.2457;Name=orf19.2457;Peak-1236354-1238429;Summit-1235224-1235230;Dist--1125	inf	+
Ca21chr1_C_albicans_SC5314	1244646	1248957	MSPC_Peak_1199;ID=orf19.2454;Name=orf19.2454;Peak-1244696-1247716;Summit-1245136-1245137;Dist-0	inf	+
Ca21chr1_C_albicans_SC5314	1244646	1248957	MSPC_Peak_1199;ID=orf19.2454;Name=orf19.2454;Peak-1244696-1247716;Summit-1247435-1247436;Dist-0	inf	+
Ca21chr1_C_albicans_SC5314	1244646	1248957	MSPC_Peak_1199;ID=orf19.2454;Name=orf19.2454;Peak-1244696-1247716;Summit-1247523-1247535;Dist-0	inf	+
Ca21chr1_C_albicans_SC5314	1244646	1248957	MSPC_Peak_1199;ID=orf19.2452;Name=orf19.2452;Peak-1248262-1249509;Summit-1248729-1248730;Dist-0	inf	-
Ca21chr1_C_albicans_SC5314	1252340	1253075	MSPC_Peak_1195;ID=orf19.2451;Name=orf19.2451;Peak-1251599-1252987;Summit-1252531-1252532;Dist-0	133.503	+
Ca21chr1_C_albicans_SC5314	1252340	1253075	MSPC_Peak_1195;ID=orf19.2451;Name=orf19.2451;Peak-1251599-1252987;Summit-1252864-1252865;Dist-0	133.503	+
Ca21chr1_C_albicans_SC5314	1283893	1285781	MSPC_Peak_1194;ID=orf19.2432;Name=orf19.2432;Peak-1284338-1285460;Summit-1284366-1284367;Dist-0	inf	-
Ca21chr1_C_albicans_SC5314	1283893	1285781	MSPC_Peak_1194;ID=orf19.2432;Name=orf19.2432;Peak-1284338-1285460;Summit-1284809-1284810;Dist-0	inf	-
Ca21chr1_C_albicans_SC5314	1285900	1286246	MSPC_Peak_1192;ID=orf19.2431;Name=orf19.2431;Peak-1286083-1286424;Summit-1286145-1286146;Dist-0	65	-
Ca21chr1_C_albicans_SC5314	1291354	1294123	MSPC_Peak_1190;ID=orf19.2661;Name=orf19.2661;Peak-1292869-1293864;Summit-1291683-1291684;Dist--1186	inf	+
Ca21chr1_C_albicans_SC5314	1291354	1294123	MSPC_Peak_1190;ID=orf19.2661;Name=orf19.2661;Peak-1292869-1293864;Summit-1291846-1291847;Dist--1023	inf	+
Ca21chr1_C_albicans_SC5314	1291354	1294123	MSPC_Peak_1190;ID=orf19.2661;Name=orf19.2661;Peak-1292869-1293864;Summit-1292901-1292917;Dist-0	inf	+
Ca21chr1_C_albicans_SC5314	1291354	1294123	MSPC_Peak_1190;ID=orf19.2661;Name=orf19.2661;Peak-1292869-1293864;Summit-1293861-1293862;Dist-0	inf	+
Ca21chr1_C_albicans_SC5314	1323407	1323661	MSPC_Peak_1188;ID=orf19.1822;Name=orf19.1822;Peak-1314494-1317025;Summit-1323567-1323568;Dist--6543	29	-
Ca21chr1_C_albicans_SC5314	1324631	1325431	MSPC_Peak_1186;ID=orf19.1821;Name=orf19.1821;Peak-1324514-1324825;Summit-1325258-1325259;Dist--434	85	-
Ca21chr1_C_albicans_SC5314	1329339	1330303	MSPC_Peak_1184;ID=orf19.1821;Name=orf19.1821;Peak-1324514-1324825;Summit-1329569-1329600;Dist--4745	inf	-
Ca21chr1_C_albicans_SC5314	1329339	1330303	MSPC_Peak_1184;ID=snR5b;Name=snR5b;Peak-1334388-1334478;Summit-1330161-1330162;Dist--4227	inf	+
Ca21chr1_C_albicans_SC5314	1331379	1333631	MSPC_Peak_1183;ID=snR5b;Name=snR5b;Peak-1334388-1334478;Summit-1331834-1331835;Dist--2554	inf	+
Ca21chr1_C_albicans_SC5314	1331379	1333631	MSPC_Peak_1183;ID=snR5b;Name=snR5b;Peak-1334388-1334478;Summit-1332995-1333034;Dist--1355	inf	+
Ca21chr1_C_albicans_SC5314	1375568	1377479	MSPC_Peak_1181;ID=orf19.6265.1;Name=orf19.6265.1;Peak-1375913-1376741;Summit-1375989-1375990;Dist-0	inf	-
Ca21chr1_C_albicans_SC5314	1375568	1377479	MSPC_Peak_1181;ID=orf19.6265.1;Name=orf19.6265.1;Peak-1375913-1376741;Summit-1376034-1376035;Dist-0	inf	-
Ca21chr1_C_albicans_SC5314	1375568	1377479	MSPC_Peak_1181;ID=orf19.6265;Name=orf19.6265;Peak-1377106-1377498;Summit-1377140-1377141;Dist-0	inf	-
Ca21chr1_C_albicans_SC5314	1375568	1377479	MSPC_Peak_1181;ID=orf19.6265;Name=orf19.6265;Peak-1377106-1377498;Summit-1377301-1377302;Dist-0	inf	-
Ca21chr1_C_albicans_SC5314	1377879	1378780	MSPC_Peak_1179;ID=orf19.6265;Name=orf19.6265;Peak-1377106-1377498;Summit-1378399-1378400;Dist--902	inf	-
Ca21chr1_C_albicans_SC5314	1377879	1378780	MSPC_Peak_1179;ID=orf19.6265;Name=orf19.6265;Peak-1377106-1377498;Summit-1378504-1378508;Dist--1007	inf	-
Ca21chr1_C_albicans_SC5314	1379928	1380223	MSPC_Peak_1177;ID=orf19.6264;Name=orf19.6264;Peak-1380462-1381178;Summit-1379988-1379989;Dist--474	40	+
Ca21chr1_C_albicans_SC5314	1409002	1409958	MSPC_Peak_1176;ID=orf19.6253;Name=orf19.6253;Peak-1409046-1409483;Summit-1409372-1409373;Dist-0	inf	+
Ca21chr1_C_albicans_SC5314	1409002	1409958	MSPC_Peak_1176;ID=orf19.6250;Name=orf19.6250;Peak-1411731-1412774;Summit-1409621-1409622;Dist--2110	inf	+
Ca21chr1_C_albicans_SC5314	1409002	1409958	MSPC_Peak_1176;ID=orf19.6250;Name=orf19.6250;Peak-1411731-1412774;Summit-1409667-1409668;Dist--2064	inf	+
Ca21chr1_C_albicans_SC5314	1468249	1469842	MSPC_Peak_1175;ID=orf19.6220.4;Name=orf19.6220.4;Peak-1468534-1469344;Summit-1468594-1468595;Dist-0	inf	-
Ca21chr1_C_albicans_SC5314	1468249	1469842	MSPC_Peak_1175;ID=orf19.6220.4;Name=orf19.6220.4;Peak-1468534-1469344;Summit-1468686-1468693;Dist-0	inf	-
Ca21chr1_C_albicans_SC5314	1468249	1469842	MSPC_Peak_1175;ID=orf19.6220.4;Name=orf19.6220.4;Peak-1468534-1469344;Summit-1469128-1469129;Dist-0	inf	-
Ca21chr1_C_albicans_SC5314	1483939	1484288	MSPC_Peak_1173;ID=tP(AGG)1;Name=tP(AGG)1;Peak-1484040-1484150;Summit-1484078-1484079;Dist-0	inf	-
Ca21chr1_C_albicans_SC5314	1483939	1484288	MSPC_Peak_1173;ID=tP(AGG)1;Name=tP(AGG)1;Peak-1484040-1484150;Summit-1484139-1484140;Dist-0	inf	-
Ca21chr1_C_albicans_SC5314	1499384	1500056	MSPC_Peak_1171;ID=orf19.6202;Name=orf19.6202;Peak-1497979-1499055;Summit-1499566-1499579;Dist--512	inf	-
Ca21chr1_C_albicans_SC5314	1500355	1501675	MSPC_Peak_1170;ID=orf19.6202;Name=orf19.6202;Peak-1497979-1499055;Summit-1500702-1500718;Dist--1648	inf	-
Ca21chr1_C_albicans_SC5314	1500355	1501675	MSPC_Peak_1170;ID=orf19.6202;Name=orf19.6202;Peak-1497979-1499055;Summit-1500764-1500765;Dist--1710	inf	-
Ca21chr1_C_albicans_SC5314	1503949	1504825	MSPC_Peak_1167;ID=orf19.6200;Name=orf19.6200;Peak-1502242-1503195;Summit-1504279-1504280;Dist--1085	inf	-
Ca21chr1_C_albicans_SC5314	1503949	1504825	MSPC_Peak_1167;ID=orf19.6200;Name=orf19.6200;Peak-1502242-1503195;Summit-1504304-1504316;Dist--1110	inf	-
Ca21chr1_C_albicans_SC5314	1510593	1511030	MSPC_Peak_1165;ID=orf19.6197;Name=orf19.6197;Peak-1509973-1511622;Summit-1510705-1510706;Dist-0	30	-
Ca21chr1_C_albicans_SC5314	1521480	1522036	MSPC_Peak_1163;ID=orf19.6193;Name=orf19.6193;Peak-1518264-1522049;Summit-1521486-1521487;Dist-0	17	+
Ca21chr1_C_albicans_SC5314	1522260	1524112	MSPC_Peak_1161;ID=orf19.4456;Name=orf19.4456;Peak-1527013-1528836;Summit-1522655-1522658;Dist--4356	inf	+
Ca21chr1_C_albicans_SC5314	1522260	1524112	MSPC_Peak_1161;ID=orf19.4456;Name=orf19.4456;Peak-1527013-1528836;Summit-1522900-1522901;Dist--4113	inf	+
Ca21chr1_C_albicans_SC5314	1524727	1525672	MSPC_Peak_1158;ID=orf19.4456;Name=orf19.4456;Peak-1527013-1528836;Summit-1524948-1524952;Dist--2062	inf	+
Ca21chr1_C_albicans_SC5314	1524727	1525672	MSPC_Peak_1158;ID=orf19.4456;Name=orf19.4456;Peak-1527013-1528836;Summit-1525159-1525160;Dist--1854	inf	+
Ca21chr1_C_albicans_SC5314	1526749	1528059	MSPC_Peak_1155;ID=orf19.4456;Name=orf19.4456;Peak-1527013-1528836;Summit-1527167-1527168;Dist-0	158.43	+
Ca21chr1_C_albicans_SC5314	1526749	1528059	MSPC_Peak_1155;ID=orf19.4456;Name=orf19.4456;Peak-1527013-1528836;Summit-1527974-1527975;Dist-0	158.43	+
Ca21chr1_C_albicans_SC5314	1528674	1529139	MSPC_Peak_1152;ID=orf19.4456;Name=orf19.4456;Peak-1527013-1528836;Summit-1528690-1528691;Dist-0	58	+
Ca21chr1_C_albicans_SC5314	1534776	1536561	MSPC_Peak_1149;ID=orf19.4450.1;Name=orf19.4450.1;Peak-1535227-1535433;Summit-1535284-1535285;Dist-0	inf	-
Ca21chr1_C_albicans_SC5314	1534776	1536561	MSPC_Peak_1149;ID=orf19.4450.1;Name=orf19.4450.1;Peak-1535227-1535433;Summit-1535342-1535343;Dist-0	inf	-
Ca21chr1_C_albicans_SC5314	1534776	1536561	MSPC_Peak_1149;ID=orf19.4450.1;Name=orf19.4450.1;Peak-1535227-1535433;Summit-1535858-1535859;Dist--426	inf	-
Ca21chr1_C_albicans_SC5314	1571053	1571317	MSPC_Peak_1146;ID=tL(AAG)2;Name=tL(AAG)2;Peak-1570053-1570173;Summit-1571077-1571078;Dist--905	27	-
Ca21chr1_C_albicans_SC5314	1614945	1615806	MSPC_Peak_1143;ID=snR42a;Name=snR42a;Peak-1615576-1615673;Summit-1615399-1615400;Dist--177	inf	+
Ca21chr1_C_albicans_SC5314	1614945	1615806	MSPC_Peak_1143;ID=snR42a;Name=snR42a;Peak-1615576-1615673;Summit-1615586-1615587;Dist-0	inf	+
Ca21chr1_C_albicans_SC5314	1630541	1631709	MSPC_Peak_1140;ID=orf19.2792;Name=orf19.2792;Peak-1626286-1629144;Summit-1631507-1631508;Dist--2364	inf	-
Ca21chr1_C_albicans_SC5314	1630541	1631709	MSPC_Peak_1140;ID=orf19.2792;Name=orf19.2792;Peak-1626286-1629144;Summit-1631558-1631559;Dist--2415	inf	-
Ca21chr1_C_albicans_SC5314	1687621	1687870	MSPC_Peak_1138;ID=orf19.4712;Name=orf19.4712;Peak-1691374-1692912;Summit-1687736-1687737;Dist--3638	inf	+
Ca21chr1_C_albicans_SC5314	1688372	1689315	MSPC_Peak_1137;ID=orf19.4712;Name=orf19.4712;Peak-1691374-1692912;Summit-1688586-1688591;Dist--2784	inf	+
Ca21chr1_C_albicans_SC5314	1713024	1713254	MSPC_Peak_1134;ID=orf19.5058;Name=orf19.5058;Peak-1711758-1713620;Summit-1713149-1713150;Dist-0	35	-
Ca21chr1_C_albicans_SC5314	1728322	1729364	MSPC_Peak_1132;ID=snR67;Name=snR67;Peak-1729196-1729287;Summit-1728750-1728761;Dist--436	inf	+
Ca21chr1_C_albicans_SC5314	1728322	1729364	MSPC_Peak_1132;ID=snR67;Name=snR67;Peak-1729196-1729287;Summit-1728835-1728836;Dist--361	inf	+
Ca21chr1_C_albicans_SC5314	1806414	1806685	MSPC_Peak_1127;ID=orf19.5102;Name=orf19.5102;Peak-1804179-1806443;Summit-1806564-1806565;Dist--122	279	-
Ca21chr1_C_albicans_SC5314	1832489	1833281	MSPC_Peak_1124;ID=orf19.5114;Name=orf19.5114;Peak-1831969-1832442;Summit-1832895-1832896;Dist--454	inf	-
Ca21chr1_C_albicans_SC5314	1832489	1833281	MSPC_Peak_1124;ID=orf19.5114;Name=orf19.5114;Peak-1831969-1832442;Summit-1832938-1832939;Dist--497	inf	-
Ca21chr1_C_albicans_SC5314	1833937	1834597	MSPC_Peak_1121;ID=orf19.5117;Name=orf19.5117;Peak-1834354-1835814;Summit-1834400-1834401;Dist-0	inf	-
Ca21chr1_C_albicans_SC5314	1833937	1834597	MSPC_Peak_1121;ID=orf19.5117;Name=orf19.5117;Peak-1834354-1835814;Summit-1834520-1834521;Dist-0	inf	-
Ca21chr1_C_albicans_SC5314	1848117	1849406	MSPC_Peak_1118;ID=orf19.385;Name=orf19.385;Peak-1846497-1849496;Summit-1848156-1848157;Dist-0	22	-
Ca21chr1_C_albicans_SC5314	1850324	1851026	MSPC_Peak_1115;ID=orf19.386;Name=orf19.386;Peak-1850470-1851405;Summit-1850478-1850479;Dist-0	143.472	-
Ca21chr1_C_albicans_SC5314	1850324	1851026	MSPC_Peak_1115;ID=orf19.386;Name=orf19.386;Peak-1850470-1851405;Summit-1850564-1850565;Dist-0	143.472	-
Ca21chr1_C_albicans_SC5314	1858230	1858875	MSPC_Peak_1112;ID=orf19.391;Name=orf19.391;Peak-1858237-1860375;Summit-1858833-1858834;Dist-0	37	-
Ca21chr1_C_albicans_SC5314	1880337	1882254	MSPC_Peak_1109;ID=orf19.406;Name=orf19.406;Peak-1880646-1882136;Summit-1881030-1881031;Dist-0	inf	-
Ca21chr1_C_albicans_SC5314	1880337	1882254	MSPC_Peak_1109;ID=orf19.406;Name=orf19.406;Peak-1880646-1882136;Summit-1881394-1881395;Dist-0	inf	-
Ca21chr1_C_albicans_SC5314	1885335	1886343	MSPC_Peak_1106;ID=orf19.409;Name=orf19.409;Peak-1885603-1886244;Summit-1885721-1885722;Dist-0	inf	-
Ca21chr1_C_albicans_SC5314	1885335	1886343	MSPC_Peak_1106;ID=orf19.409;Name=orf19.409;Peak-1885603-1886244;Summit-1885841-1885842;Dist-0	inf	-
Ca21chr1_C_albicans_SC5314	1941525	1942042	MSPC_Peak_1103;ID=orf19.4752;Name=orf19.4752;Peak-1940516-1942792;Summit-1941915-1941916;Dist-0	49	-
Ca21chr1_C_albicans_SC5314	1945394	1945739	MSPC_Peak_1100;ID=orf19.4752;Name=orf19.4752;Peak-1940516-1942792;Summit-1945450-1945451;Dist--2659	20	-
Ca21chr1_C_albicans_SC5314	1952141	1953619	MSPC_Peak_1098;ID=snR190;Name=snR190;Peak-1952462-1952638;Summit-1952441-1952442;Dist--21	inf	+
Ca21chr1_C_albicans_SC5314	1952141	1953619	MSPC_Peak_1098;ID=snR128;Name=snR128;Peak-1952996-1953111;Summit-1953061-1953083;Dist-0	inf	+
Ca21chr1_C_albicans_SC5314	1953975	1954637	MSPC_Peak_1095;ID=orf19.4754;Name=orf19.4754;Peak-1953369-1954892;Summit-1954114-1954121;Dist-0	42.98	-
Ca21chr1_C_albicans_SC5314	1966166	1966758	MSPC_Peak_1092;ID=orf19.4759;Name=orf19.4759;Peak-1966392-1966889;Summit-1966444-1966445;Dist-0	131.509	-
Ca21chr1_C_albicans_SC5314	1966166	1966758	MSPC_Peak_1092;ID=orf19.4759;Name=orf19.4759;Peak-1966392-1966889;Summit-1966561-1966562;Dist-0	131.509	-
Ca21chr1_C_albicans_SC5314	1979481	1979933	MSPC_Peak_1090;ID=orf19.4765;Name=orf19.4765;Peak-1978234-1978893;Summit-1979557-1979558;Dist--665	72.76	-
Ca21chr1_C_albicans_SC5314	1979481	1979933	MSPC_Peak_1090;ID=orf19.4765;Name=orf19.4765;Peak-1978234-1978893;Summit-1979825-1979826;Dist--933	72.76	-
Ca21chr1_C_albicans_SC5314	2012838	2013730	MSPC_Peak_1084;ID=orf19.4776;Name=orf19.4776;Peak-2014937-2017567;Summit-2013064-2013065;Dist--1873	inf	+
Ca21chr1_C_albicans_SC5314	2012838	2013730	MSPC_Peak_1084;ID=orf19.4776;Name=orf19.4776;Peak-2014937-2017567;Summit-2013087-2013088;Dist--1850	inf	+
Ca21chr1_C_albicans_SC5314	2017498	2019448	MSPC_Peak_1081;ID=orf19.4777;Name=orf19.4777;Peak-2017683-2019470;Summit-2017788-2017789;Dist-0	189.354	-
Ca21chr1_C_albicans_SC5314	2017498	2019448	MSPC_Peak_1081;ID=orf19.4777;Name=orf19.4777;Peak-2017683-2019470;Summit-2019003-2019004;Dist-0	189.354	-
Ca21chr1_C_albicans_SC5314	2031049	2033157	MSPC_Peak_1078;ID=orf19.4784;Name=orf19.4784;Peak-2031132-2034725;Summit-2032297-2032298;Dist-0	245.243	+
Ca21chr1_C_albicans_SC5314	2031049	2033157	MSPC_Peak_1078;ID=orf19.4784;Name=orf19.4784;Peak-2031132-2034725;Summit-2033068-2033069;Dist-0	245.243	+
Ca21chr1_C_albicans_SC5314	2033756	2034982	MSPC_Peak_1075;ID=orf19.4784;Name=orf19.4784;Peak-2031132-2034725;Summit-2034333-2034334;Dist-0	280	+
Ca21chr1_C_albicans_SC5314	2050257	2051006	MSPC_Peak_1072;ID=orf19.4792;Name=orf19.4792;Peak-2050138-2051811;Summit-2050841-2050842;Dist-0	58	-
Ca21chr1_C_albicans_SC5314	2052177	2053346	MSPC_Peak_1069;ID=orf19.4792;Name=orf19.4792;Peak-2050138-2051811;Summit-2053136-2053158;Dist--1326	inf	-
Ca21chr1_C_albicans_SC5314	2105346	2105872	MSPC_Peak_1066;ID=orf19.4820;Name=orf19.4820;Peak-2107090-2108712;Summit-2105491-2105492;Dist--1599	196.964	+
Ca21chr1_C_albicans_SC5314	2105346	2105872	MSPC_Peak_1066;ID=orf19.4820;Name=orf19.4820;Peak-2107090-2108712;Summit-2105524-2105525;Dist--1566	196.964	+
Ca21chr1_C_albicans_SC5314	2105346	2105872	MSPC_Peak_1066;ID=snR31a;Name=snR31a;Peak-2105814-2105882;Summit-2105821-2105822;Dist-0	196.964	-
Ca21chr1_C_albicans_SC5314	2120967	2121849	MSPC_Peak_1062;ID=orf19.4826;Name=orf19.4826;Peak-2120442-2121755;Summit-2121455-2121456;Dist-0	109	+
Ca21chr1_C_albicans_SC5314	2122728	2123615	MSPC_Peak_1059;ID=orf19.4827;Name=orf19.4827;Peak-2122303-2123589;Summit-2123163-2123164;Dist-0	61.829	+
Ca21chr1_C_albicans_SC5314	2122728	2123615	MSPC_Peak_1059;ID=orf19.4827;Name=orf19.4827;Peak-2122303-2123589;Summit-2123398-2123399;Dist-0	61.829	+
Ca21chr1_C_albicans_SC5314	2130888	2131514	MSPC_Peak_1056;ID=orf19.4831;Name=orf19.4831;Peak-2129818-2131359;Summit-2131214-2131215;Dist-0	89.672	+
Ca21chr1_C_albicans_SC5314	2130888	2131514	MSPC_Peak_1056;ID=orf19.4831;Name=orf19.4831;Peak-2129818-2131359;Summit-2131267-2131268;Dist-0	89.672	+
Ca21chr1_C_albicans_SC5314	2164188	2164463	MSPC_Peak_1053;ID=tS(CGA)1;Name=tS(CGA)1;Peak-2164292-2164386;Summit-2164310-2164311;Dist-0	inf	-
Ca21chr1_C_albicans_SC5314	2164188	2164463	MSPC_Peak_1053;ID=tS(CGA)1;Name=tS(CGA)1;Peak-2164292-2164386;Summit-2164344-2164345;Dist-0	inf	-
Ca21chr1_C_albicans_SC5314	2193631	2194241	MSPC_Peak_1051;ID=orf19.4867;Name=orf19.4867;Peak-2189160-2192696;Summit-2194002-2194003;Dist--1307	inf	-
Ca21chr1_C_albicans_SC5314	2193631	2194241	MSPC_Peak_1051;ID=orf19.4869;Name=orf19.4869;Peak-2195405-2196958;Summit-2194071-2194077;Dist--1329	inf	+
Ca21chr1_C_albicans_SC5314	2213712	2214281	MSPC_Peak_1049;ID=orf19.4880;Name=orf19.4880;Peak-2214100-2216268;Summit-2213811-2213818;Dist--283	255.742	+
Ca21chr1_C_albicans_SC5314	2213712	2214281	MSPC_Peak_1049;ID=orf19.4880;Name=orf19.4880;Peak-2214100-2216268;Summit-2213846-2213847;Dist--254	255.742	+
Ca21chr1_C_albicans_SC5314	2217598	2218247	MSPC_Peak_1046;ID=snR10a;Name=snR10a;Peak-2217768-2217868;Summit-2217814-2217815;Dist-0	inf	+
Ca21chr1_C_albicans_SC5314	2217598	2218247	MSPC_Peak_1046;ID=orf19.4883;Name=orf19.4883;Peak-2217971-2220202;Summit-2217982-2217983;Dist-0	inf	-
Ca21chr1_C_albicans_SC5314	2217598	2218247	MSPC_Peak_1046;ID=orf19.4883;Name=orf19.4883;Peak-2217971-2220202;Summit-2218044-2218045;Dist-0	inf	-
Ca21chr1_C_albicans_SC5314	2236390	2237687	MSPC_Peak_1041;ID=orf19.4885;Name=orf19.4885;Peak-2236380-2237303;Summit-2236596-2236597;Dist-0	117.401	+
Ca21chr1_C_albicans_SC5314	2236390	2237687	MSPC_Peak_1041;ID=orf19.4885;Name=orf19.4885;Peak-2236380-2237303;Summit-2237187-2237188;Dist-0	117.401	+
Ca21chr1_C_albicans_SC5314	2236390	2237687	MSPC_Peak_1041;ID=orf19.4885;Name=orf19.4885;Peak-2236380-2237303;Summit-2237228-2237229;Dist-0	117.401	+
Ca21chr1_C_albicans_SC5314	2246441	2246760	MSPC_Peak_1038;ID=orf19.4889;Name=orf19.4889;Peak-2246513-2248267;Summit-2246518-2246519;Dist-0	28	-
Ca21chr1_C_albicans_SC5314	2249440	2250081	MSPC_Peak_1035;ID=orf19.4890;Name=orf19.4890;Peak-2249543-2252473;Summit-2249550-2249551;Dist-0	274.681	-
Ca21chr1_C_albicans_SC5314	2249440	2250081	MSPC_Peak_1035;ID=orf19.4890;Name=orf19.4890;Peak-2249543-2252473;Summit-2249572-2249592;Dist-0	274.681	-
Ca21chr1_C_albicans_SC5314	2253903	2254648	MSPC_Peak_1032;ID=orf19.4890;Name=orf19.4890;Peak-2249543-2252473;Summit-2254406-2254415;Dist--1934	inf	-
Ca21chr1_C_albicans_SC5314	2273574	2273883	MSPC_Peak_1029;ID=orf19.4899;Name=orf19.4899;Peak-2271539-2274379;Summit-2273677-2273678;Dist-0	45	+
Ca21chr1_C_albicans_SC5314	2274616	2275766	MSPC_Peak_1027;ID=orf19.4900;Name=orf19.4900;Peak-2276399-2278885;Summit-2275389-2275412;Dist--988	inf	+
Ca21chr1_C_albicans_SC5314	2276318	2279030	MSPC_Peak_1024;ID=orf19.4900;Name=orf19.4900;Peak-2276399-2278885;Summit-2278685-2278693;Dist-0	inf	+
Ca21chr1_C_albicans_SC5314	2287260	2288049	MSPC_Peak_1022;ID=orf19.4906;Name=orf19.4906;Peak-2287271-2289577;Summit-2287406-2287407;Dist-0	90	-
Ca21chr1_C_albicans_SC5314	2289728	2290295	MSPC_Peak_1020;ID=orf19.4906;Name=orf19.4906;Peak-2287271-2289577;Summit-2290027-2290028;Dist--451	237.804	-
Ca21chr1_C_albicans_SC5314	2289728	2290295	MSPC_Peak_1020;ID=orf19.4906;Name=orf19.4906;Peak-2287271-2289577;Summit-2290092-2290093;Dist--516	237.804	-
Ca21chr1_C_albicans_SC5314	2289728	2290295	MSPC_Peak_1020;ID=orf19.4906;Name=orf19.4906;Peak-2287271-2289577;Summit-2290165-2290166;Dist--589	237.804	-
Ca21chr1_C_albicans_SC5314	2293365	2293729	MSPC_Peak_1018;ID=orf19.4907;Name=orf19.4907;Peak-2292992-2294809;Summit-2293576-2293577;Dist-0	37	-
Ca21chr1_C_albicans_SC5314	2299655	2300762	MSPC_Peak_1016;ID=orf19.4909;Name=orf19.4909;Peak-2296938-2299136;Summit-2299947-2299948;Dist--812	inf	-
Ca21chr1_C_albicans_SC5314	2299655	2300762	MSPC_Peak_1016;ID=orf19.4909.1;Name=orf19.4909.1;Peak-2300032-2300710;Summit-2300095-2300096;Dist-0	inf	-
Ca21chr1_C_albicans_SC5314	2299655	2300762	MSPC_Peak_1016;ID=orf19.4909.1;Name=orf19.4909.1;Peak-2300032-2300710;Summit-2300119-2300120;Dist-0	inf	-
Ca21chr1_C_albicans_SC5314	2315051	2316591	MSPC_Peak_1014;ID=orf19.986;Name=orf19.986;Peak-2315247-2316368;Summit-2315627-2315628;Dist-0	inf	+
Ca21chr1_C_albicans_SC5314	2315051	2316591	MSPC_Peak_1014;ID=orf19.986;Name=orf19.986;Peak-2315247-2316368;Summit-2315808-2315809;Dist-0	inf	+
Ca21chr1_C_albicans_SC5314	2393156	2395117	MSPC_Peak_1011;ID=orf19.2337;Name=orf19.2337;Peak-2393608-2395239;Summit-2393919-2393920;Dist-0	165.411	-
Ca21chr1_C_albicans_SC5314	2393156	2395117	MSPC_Peak_1011;ID=orf19.2337;Name=orf19.2337;Peak-2393608-2395239;Summit-2393977-2393978;Dist-0	165.411	-
Ca21chr1_C_albicans_SC5314	2399475	2401266	MSPC_Peak_1009;ID=orf19.2333;Name=orf19.2333;Peak-2399724-2401214;Summit-2399762-2399763;Dist-0	inf	-
Ca21chr1_C_albicans_SC5314	2399475	2401266	MSPC_Peak_1009;ID=orf19.2333;Name=orf19.2333;Peak-2399724-2401214;Summit-2400389-2400390;Dist-0	inf	-
Ca21chr1_C_albicans_SC5314	2399475	2401266	MSPC_Peak_1009;ID=orf19.2333;Name=orf19.2333;Peak-2399724-2401214;Summit-2400843-2400844;Dist-0	inf	-
Ca21chr1_C_albicans_SC5314	2399475	2401266	MSPC_Peak_1009;ID=orf19.2333;Name=orf19.2333;Peak-2399724-2401214;Summit-2401109-2401110;Dist-0	inf	-
Ca21chr1_C_albicans_SC5314	2402408	2403014	MSPC_Peak_1004;ID=orf19.2332;Name=orf19.2332;Peak-2403598-2404392;Summit-2402494-2402495;Dist--1104	304.593	+
Ca21chr1_C_albicans_SC5314	2402408	2403014	MSPC_Peak_1004;ID=orf19.2332;Name=orf19.2332;Peak-2403598-2404392;Summit-2402540-2402541;Dist--1058	304.593	+
Ca21chr1_C_albicans_SC5314	2402408	2403014	MSPC_Peak_1004;ID=orf19.2332;Name=orf19.2332;Peak-2403598-2404392;Summit-2402885-2402886;Dist--713	304.593	+
Ca21chr1_C_albicans_SC5314	2406539	2407762	MSPC_Peak_999;ID=orf19.2329.1;Name=orf19.2329.1;Peak-2406592-2407384;Summit-2407165-2407166;Dist-0	inf	+
Ca21chr1_C_albicans_SC5314	2406539	2407762	MSPC_Peak_999;ID=orf19.2329.1;Name=orf19.2329.1;Peak-2406592-2407384;Summit-2407252-2407253;Dist-0	inf	+
Ca21chr1_C_albicans_SC5314	2406539	2407762	MSPC_Peak_999;ID=orf19.2329.1;Name=orf19.2329.1;Peak-2406592-2407384;Summit-2407292-2407293;Dist-0	inf	+
Ca21chr1_C_albicans_SC5314	2410171	2410615	MSPC_Peak_997;ID=tI(UAU)1;Name=tI(UAU)1;Peak-2410353-2410460;Summit-2410386-2410392;Dist-0	inf	-
Ca21chr1_C_albicans_SC5314	2432451	2434795	MSPC_Peak_994;ID=orf19.2311;Name=orf19.2311;Peak-2432455-2433574;Summit-2432957-2432958;Dist-0	inf	+
Ca21chr1_C_albicans_SC5314	2432451	2434795	MSPC_Peak_994;ID=orf19.2310;Name=orf19.2310;Peak-2434657-2435635;Summit-2434440-2434441;Dist--217	inf	+
Ca21chr1_C_albicans_SC5314	2432451	2434795	MSPC_Peak_994;ID=orf19.2310;Name=orf19.2310;Peak-2434657-2435635;Summit-2434488-2434493;Dist--165	inf	+
Ca21chr1_C_albicans_SC5314	2436779	2437080	MSPC_Peak_991;ID=orf19.2309.2;Name=orf19.2309.2;Peak-2435875-2437043;Summit-2436786-2436787;Dist-0	73.788	-
Ca21chr1_C_albicans_SC5314	2436779	2437080	MSPC_Peak_991;ID=orf19.2309.2;Name=orf19.2309.2;Peak-2435875-2437043;Summit-2436812-2436826;Dist-0	73.788	-
Ca21chr1_C_albicans_SC5314	2440907	2441190	MSPC_Peak_988;ID=orf19.2308;Name=orf19.2308;Peak-2442032-2443117;Summit-2441034-2441035;Dist--998	73	+
Ca21chr1_C_albicans_SC5314	2441936	2443444	MSPC_Peak_985;ID=orf19.2308;Name=orf19.2308;Peak-2442032-2443117;Summit-2442416-2442417;Dist-0	inf	+
Ca21chr1_C_albicans_SC5314	2441936	2443444	MSPC_Peak_985;ID=orf19.2308;Name=orf19.2308;Peak-2442032-2443117;Summit-2442532-2442533;Dist-0	inf	+
Ca21chr1_C_albicans_SC5314	2453671	2454592	MSPC_Peak_983;ID=orf19.2298;Name=orf19.2298;Peak-2453068-2454381;Summit-2454147-2454148;Dist-0	inf	+
Ca21chr1_C_albicans_SC5314	2453671	2454592	MSPC_Peak_983;ID=orf19.2298;Name=orf19.2298;Peak-2453068-2454381;Summit-2454280-2454281;Dist-0	inf	+
Ca21chr1_C_albicans_SC5314	2481519	2482223	MSPC_Peak_980;ID=orf19.671;Name=orf19.671;Peak-2481501-2483510;Summit-2481714-2481715;Dist-0	60	-
Ca21chr1_C_albicans_SC5314	2484906	2486528	MSPC_Peak_977;ID=orf19.670.2;Name=orf19.670.2;Peak-2485275-2485587;Summit-2485313-2485326;Dist-0	inf	-
Ca21chr1_C_albicans_SC5314	2484906	2486528	MSPC_Peak_977;ID=orf19.670.2;Name=orf19.670.2;Peak-2485275-2485587;Summit-2486047-2486048;Dist--461	inf	-
Ca21chr1_C_albicans_SC5314	2486939	2487460	MSPC_Peak_974;ID=orf19.669;Name=orf19.669;Peak-2487975-2489846;Summit-2487105-2487118;Dist--858	144.469	+
Ca21chr1_C_albicans_SC5314	2492107	2493202	MSPC_Peak_971;ID=orf19.668;Name=orf19.668;Peak-2489908-2491386;Summit-2492811-2492812;Dist--1426	inf	-
Ca21chr1_C_albicans_SC5314	2492107	2493202	MSPC_Peak_971;ID=orf19.668;Name=orf19.668;Peak-2489908-2491386;Summit-2492969-2492970;Dist--1584	inf	-
Ca21chr1_C_albicans_SC5314	2492107	2493202	MSPC_Peak_971;ID=orf19.668;Name=orf19.668;Peak-2489908-2491386;Summit-2493011-2493012;Dist--1626	inf	-
Ca21chr1_C_albicans_SC5314	2515080	2515452	MSPC_Peak_969;ID=orf19.657;Name=orf19.657;Peak-2513620-2514777;Summit-2515268-2515277;Dist--492	inf	-
Ca21chr1_C_albicans_SC5314	2520118	2520427	MSPC_Peak_967;ID=orf19.656;Name=orf19.656;Peak-2517587-2518372;Summit-2520266-2520285;Dist--1895	inf	-
Ca21chr1_C_albicans_SC5314	2522180	2524352	MSPC_Peak_964;ID=orf19.655;Name=orf19.655;Peak-2522395-2524032;Summit-2522687-2522688;Dist-0	inf	+
Ca21chr1_C_albicans_SC5314	2522180	2524352	MSPC_Peak_964;ID=orf19.655;Name=orf19.655;Peak-2522395-2524032;Summit-2523259-2523260;Dist-0	inf	+
Ca21chr1_C_albicans_SC5314	2522180	2524352	MSPC_Peak_964;ID=orf19.655;Name=orf19.655;Peak-2522395-2524032;Summit-2523763-2523764;Dist-0	inf	+
Ca21chr1_C_albicans_SC5314	2541714	2542104	MSPC_Peak_961;ID=orf19.1161;Name=orf19.1161;Peak-2542332-2547464;Summit-2542051-2542052;Dist--281	51	+
Ca21chr1_C_albicans_SC5314	2554393	2555105	MSPC_Peak_955;ID=orf19.1153;Name=orf19.1153;Peak-2555881-2557587;Summit-2554801-2554802;Dist--1080	193.345	+
Ca21chr1_C_albicans_SC5314	2554393	2555105	MSPC_Peak_955;ID=orf19.1153;Name=orf19.1153;Peak-2555881-2557587;Summit-2554933-2554934;Dist--948	193.345	+
Ca21chr1_C_albicans_SC5314	2557190	2557505	MSPC_Peak_951;ID=orf19.1153;Name=orf19.1153;Peak-2555881-2557587;Summit-2557400-2557401;Dist-0	30	+
Ca21chr1_C_albicans_SC5314	2558676	2559427	MSPC_Peak_949;ID=orf19.1152;Name=orf19.1152;Peak-2558395-2559192;Summit-2559079-2559080;Dist-0	183.367	+
Ca21chr1_C_albicans_SC5314	2558676	2559427	MSPC_Peak_949;ID=orf19.1150.1;Name=orf19.1150.1;Peak-2559262-2559483;Summit-2559350-2559351;Dist-0	183.367	-
Ca21chr1_C_albicans_SC5314	2582656	2583257	MSPC_Peak_947;ID=snR8a;Name=snR8a;Peak-2583867-2583978;Summit-2582976-2582993;Dist--875	inf	+
Ca21chr1_C_albicans_SC5314	2582656	2583257	MSPC_Peak_947;ID=snR8a;Name=snR8a;Peak-2583867-2583978;Summit-2583022-2583023;Dist--845	inf	+
Ca21chr1_C_albicans_SC5314	2583757	2584089	MSPC_Peak_943;ID=snR8a;Name=snR8a;Peak-2583867-2583978;Summit-2583925-2583926;Dist-0	228.273	+
Ca21chr1_C_albicans_SC5314	2583757	2584089	MSPC_Peak_943;ID=orf19.1137;Name=orf19.1137;Peak-2584210-2584884;Summit-2583995-2583996;Dist--215	228.273	+
Ca21chr1_C_albicans_SC5314	2588547	2589360	MSPC_Peak_939;ID=tY(GUA)1;Name=tY(GUA)1;Peak-2588713-2588821;Summit-2588773-2588780;Dist-0	inf	+
Ca21chr1_C_albicans_SC5314	2591930	2593018	MSPC_Peak_935;ID=orf19.5282;Name=orf19.5282;Peak-2593345-2594787;Summit-2592072-2592073;Dist--1273	193.977	+
Ca21chr1_C_albicans_SC5314	2591930	2593018	MSPC_Peak_935;ID=orf19.5282;Name=orf19.5282;Peak-2593345-2594787;Summit-2592789-2592790;Dist--556	193.977	+
Ca21chr1_C_albicans_SC5314	2591930	2593018	MSPC_Peak_935;ID=orf19.5282;Name=orf19.5282;Peak-2593345-2594787;Summit-2592825-2592826;Dist--520	193.977	+
Ca21chr1_C_albicans_SC5314	2594224	2594744	MSPC_Peak_931;ID=orf19.5282;Name=orf19.5282;Peak-2593345-2594787;Summit-2594300-2594301;Dist-0	76.738	+
Ca21chr1_C_albicans_SC5314	2594224	2594744	MSPC_Peak_931;ID=orf19.5282;Name=orf19.5282;Peak-2593345-2594787;Summit-2594357-2594358;Dist-0	76.738	+
Ca21chr1_C_albicans_SC5314	2600407	2601902	MSPC_Peak_928;ID=orf19.5280;Name=orf19.5280;Peak-2600273-2601934;Summit-2600984-2600985;Dist-0	86.686	+
Ca21chr1_C_albicans_SC5314	2600407	2601902	MSPC_Peak_928;ID=orf19.5280;Name=orf19.5280;Peak-2600273-2601934;Summit-2601351-2601352;Dist-0	86.686	+
Ca21chr1_C_albicans_SC5314	2626479	2629346	MSPC_Peak_924;ID=orf19.5265;Name=orf19.5265;Peak-2626667-2629381;Summit-2626833-2626834;Dist-0	inf	-
Ca21chr1_C_albicans_SC5314	2626479	2629346	MSPC_Peak_924;ID=orf19.5265;Name=orf19.5265;Peak-2626667-2629381;Summit-2628011-2628012;Dist-0	inf	-
Ca21chr1_C_albicans_SC5314	2626479	2629346	MSPC_Peak_924;ID=orf19.5265;Name=orf19.5265;Peak-2626667-2629381;Summit-2628920-2628921;Dist-0	inf	-
Ca21chr1_C_albicans_SC5314	2629752	2630651	MSPC_Peak_919;ID=orf19.5265;Name=orf19.5265;Peak-2626667-2629381;Summit-2629869-2629880;Dist--489	236.259	-
Ca21chr1_C_albicans_SC5314	2631707	2632605	MSPC_Peak_916;ID=orf19.5264;Name=orf19.5264;Peak-2632107-2632532;Summit-2631899-2631905;Dist--203	inf	+
Ca21chr1_C_albicans_SC5314	2631707	2632605	MSPC_Peak_916;ID=orf19.5264;Name=orf19.5264;Peak-2632107-2632532;Summit-2632417-2632418;Dist-0	inf	+
Ca21chr1_C_albicans_SC5314	2633624	2634435	MSPC_Peak_912;ID=orf19.5263;Name=orf19.5263;Peak-2633019-2634410;Summit-2633851-2633852;Dist-0	80	+
Ca21chr1_C_albicans_SC5314	2671986	2672613	MSPC_Peak_908;ID=orf19.5241;Name=orf19.5241;Peak-2669672-2672677;Summit-2672378-2672379;Dist-0	137	+
Ca21chr1_C_albicans_SC5314	2693763	2694680	MSPC_Peak_903;ID=orf19.5228;Name=orf19.5228;Peak-2694013-2694636;Summit-2694154-2694155;Dist-0	270.201	-
Ca21chr1_C_albicans_SC5314	2693763	2694680	MSPC_Peak_903;ID=orf19.5228;Name=orf19.5228;Peak-2694013-2694636;Summit-2694223-2694224;Dist-0	270.201	-
Ca21chr1_C_albicans_SC5314	2698024	2699225	MSPC_Peak_894;ID=orf19.5226;Name=orf19.5226;Peak-2696598-2697872;Summit-2698230-2698231;Dist--359	inf	-
Ca21chr1_C_albicans_SC5314	2698024	2699225	MSPC_Peak_894;ID=orf19.5226;Name=orf19.5226;Peak-2696598-2697872;Summit-2698317-2698318;Dist--446	inf	-
Ca21chr1_C_albicans_SC5314	2698024	2699225	MSPC_Peak_894;ID=orf19.5226;Name=orf19.5226;Peak-2696598-2697872;Summit-2698343-2698344;Dist--472	inf	-
Ca21chr1_C_albicans_SC5314	2709511	2709764	MSPC_Peak_889;ID=orf19.5219;Name=orf19.5219;Peak-2709143-2717074;Summit-2709523-2709524;Dist-0	19	-
Ca21chr1_C_albicans_SC5314	2709813	2715291	MSPC_Peak_884;ID=orf19.5219;Name=orf19.5219;Peak-2709143-2717074;Summit-2710204-2710205;Dist-0	245.48	-
Ca21chr1_C_albicans_SC5314	2709813	2715291	MSPC_Peak_884;ID=orf19.5219;Name=orf19.5219;Peak-2709143-2717074;Summit-2712708-2712709;Dist-0	245.48	-
Ca21chr1_C_albicans_SC5314	2709813	2715291	MSPC_Peak_884;ID=orf19.5219;Name=orf19.5219;Peak-2709143-2717074;Summit-2713853-2713854;Dist-0	245.48	-
Ca21chr1_C_albicans_SC5314	2709813	2715291	MSPC_Peak_884;ID=orf19.5219;Name=orf19.5219;Peak-2709143-2717074;Summit-2714047-2714048;Dist-0	245.48	-
Ca21chr1_C_albicans_SC5314	2715566	2716792	MSPC_Peak_876;ID=orf19.5219;Name=orf19.5219;Peak-2709143-2717074;Summit-2715884-2715885;Dist-0	88.677	-
Ca21chr1_C_albicans_SC5314	2715566	2716792	MSPC_Peak_876;ID=orf19.5219;Name=orf19.5219;Peak-2709143-2717074;Summit-2716271-2716272;Dist-0	88.677	-
Ca21chr1_C_albicans_SC5314	2718571	2719175	MSPC_Peak_874;ID=orf19.69.2;Name=orf19.69.2;Peak-2718745-2719038;Summit-2718799-2718807;Dist-0	inf	-
Ca21chr1_C_albicans_SC5314	2725754	2726020	MSPC_Peak_869;ID=orf19.3767;Name=orf19.3767;Peak-2723345-2727364;Summit-2725958-2725959;Dist-0	33	+
Ca21chr1_C_albicans_SC5314	2727304	2727942	MSPC_Peak_865;ID=tW(CCA)1;Name=tW(CCA)1;Peak-2727637-2727733;Summit-2727657-2727675;Dist-0	inf	-
Ca21chr1_C_albicans_SC5314	2728541	2728967	MSPC_Peak_858;ID=tW(CCA)1;Name=tW(CCA)1;Peak-2727637-2727733;Summit-2728618-2728626;Dist--886	60.835	-
Ca21chr1_C_albicans_SC5314	2784138	2784814	MSPC_Peak_853;ID=orf19.6345;Name=orf19.6345;Peak-2782583-2785375;Summit-2784287-2784288;Dist-0	91.663	+
Ca21chr1_C_albicans_SC5314	2784138	2784814	MSPC_Peak_853;ID=orf19.6345;Name=orf19.6345;Peak-2782583-2785375;Summit-2784497-2784498;Dist-0	91.663	+
Ca21chr1_C_albicans_SC5314	2799328	2800713	MSPC_Peak_850;ID=orf19.4914.1;Name=orf19.4914.1;Peak-2799928-2800161;Summit-2799975-2799976;Dist-0	inf	+
Ca21chr1_C_albicans_SC5314	2799328	2800713	MSPC_Peak_850;ID=orf19.4913;Name=orf19.4913;Peak-2792838-2796467;Summit-2800342-2800343;Dist--3876	inf	-
Ca21chr1_C_albicans_SC5314	2811665	2812398	MSPC_Peak_847;ID=orf19.4921.1;Name=orf19.4921.1;Peak-2812003-2812167;Summit-2812060-2812061;Dist-0	197.336	+
Ca21chr1_C_albicans_SC5314	2811665	2812398	MSPC_Peak_847;ID=orf19.4921.1;Name=orf19.4921.1;Peak-2812003-2812167;Summit-2812126-2812127;Dist-0	197.336	+
Ca21chr1_C_albicans_SC5314	2830768	2831803	MSPC_Peak_842;ID=snR70;Name=snR70;Peak-2831408-2831499;Summit-2831341-2831358;Dist--51	inf	+
Ca21chr1_C_albicans_SC5314	2830768	2831803	MSPC_Peak_842;ID=snR70;Name=snR70;Peak-2831408-2831499;Summit-2831477-2831478;Dist-0	inf	+
Ca21chr1_C_albicans_SC5314	2838836	2839525	MSPC_Peak_835;ID=orf19.4931;Name=orf19.4931;Peak-2836544-2838889;Summit-2839358-2839359;Dist--470	168.404	-
Ca21chr1_C_albicans_SC5314	2838836	2839525	MSPC_Peak_835;ID=snR87;Name=snR87;Peak-2839361-2839464;Summit-2839390-2839391;Dist-0	168.404	-
Ca21chr1_C_albicans_SC5314	2839834	2841221	MSPC_Peak_831;ID=snR87;Name=snR87;Peak-2839361-2839464;Summit-2840788-2840789;Dist--1325	inf	-
Ca21chr1_C_albicans_SC5314	2839834	2841221	MSPC_Peak_831;ID=snR87;Name=snR87;Peak-2839361-2839464;Summit-2840871-2840875;Dist--1408	inf	-
Ca21chr1_C_albicans_SC5314	2851785	2852204	MSPC_Peak_819;ID=orf19.4936;Name=orf19.4936;Peak-2853604-2853999;Summit-2852054-2852055;Dist--1550	108.591	+
Ca21chr1_C_albicans_SC5314	2851785	2852204	MSPC_Peak_819;ID=orf19.4936;Name=orf19.4936;Peak-2853604-2853999;Summit-2852112-2852113;Dist--1492	108.591	+
Ca21chr1_C_albicans_SC5314	2852481	2854501	MSPC_Peak_814;ID=orf19.4936;Name=orf19.4936;Peak-2853604-2853999;Summit-2852672-2852673;Dist--932	inf	+
Ca21chr1_C_albicans_SC5314	2852481	2854501	MSPC_Peak_814;ID=orf19.4936;Name=orf19.4936;Peak-2853604-2853999;Summit-2852695-2852696;Dist--909	inf	+
Ca21chr1_C_albicans_SC5314	2852481	2854501	MSPC_Peak_814;ID=orf19.4936.1;Name=orf19.4936.1;Peak-2855099-2855314;Summit-2854211-2854240;Dist--860	inf	+
Ca21chr1_C_albicans_SC5314	2854992	2857626	MSPC_Peak_810;ID=orf19.4933;Name=orf19.4933;Peak-2843736-2845037;Summit-2855586-2855587;Dist--10550	inf	-
Ca21chr1_C_albicans_SC5314	2854992	2857626	MSPC_Peak_810;ID=orf19.4933;Name=orf19.4933;Peak-2843736-2845037;Summit-2855669-2855670;Dist--10633	inf	-
Ca21chr1_C_albicans_SC5314	2854992	2857626	MSPC_Peak_810;ID=orf19.4933;Name=orf19.4933;Peak-2843736-2845037;Summit-2855851-2855852;Dist--10815	inf	-
Ca21chr1_C_albicans_SC5314	2854992	2857626	MSPC_Peak_810;ID=orf19.4937;Name=orf19.4937;Peak-2856351-2859992;Summit-2857315-2857316;Dist-0	inf	-
Ca21chr1_C_albicans_SC5314	2860930	2861360	MSPC_Peak_805;ID=orf19.4937;Name=orf19.4937;Peak-2856351-2859992;Summit-2861118-2861122;Dist--1127	inf	-
Ca21chr1_C_albicans_SC5314	2868513	2871718	MSPC_Peak_800;ID=orf19.4941;Name=orf19.4941;Peak-2869020-2869829;Summit-2869260-2869261;Dist-0	inf	-
Ca21chr1_C_albicans_SC5314	2868513	2871718	MSPC_Peak_800;ID=orf19.4941;Name=orf19.4941;Peak-2869020-2869829;Summit-2869348-2869349;Dist-0	inf	-
Ca21chr1_C_albicans_SC5314	2868513	2871718	MSPC_Peak_800;ID=orf19.4942;Name=orf19.4942;Peak-2871337-2871705;Summit-2871245-2871246;Dist--92	inf	+
Ca21chr1_C_albicans_SC5314	2875071	2875349	MSPC_Peak_794;ID=orf19.4943;Name=orf19.4943;Peak-2874278-2875654;Summit-2875200-2875201;Dist-0	35	+
Ca21chr1_C_albicans_SC5314	2880688	2881509	MSPC_Peak_789;ID=orf19.4945;Name=orf19.4945;Peak-2875727-2879371;Summit-2881276-2881277;Dist--1906	inf	-
Ca21chr1_C_albicans_SC5314	2880688	2881509	MSPC_Peak_789;ID=orf19.4945;Name=orf19.4945;Peak-2875727-2879371;Summit-2881330-2881331;Dist--1960	inf	-
Ca21chr1_C_albicans_SC5314	2883089	2884162	MSPC_Peak_785;ID=orf19.4949;Name=orf19.4949;Peak-2883066-2883368;Summit-2883340-2883358;Dist-0	inf	-
Ca21chr1_C_albicans_SC5314	2883089	2884162	MSPC_Peak_785;ID=orf19.4949;Name=orf19.4949;Peak-2883066-2883368;Summit-2883665-2883666;Dist--298	inf	-
Ca21chr1_C_albicans_SC5314	2889997	2893314	MSPC_Peak_780;ID=orf19.4952;Name=orf19.4952;Peak-2891695-2892633;Summit-2890259-2890275;Dist--1421	inf	+
Ca21chr1_C_albicans_SC5314	2889997	2893314	MSPC_Peak_780;ID=orf19.4952;Name=orf19.4952;Peak-2891695-2892633;Summit-2891839-2891840;Dist-0	inf	+
Ca21chr1_C_albicans_SC5314	2898470	2898773	MSPC_Peak_772;ID=orf19.4956;Name=orf19.4956;Peak-2898458-2901442;Summit-2898578-2898579;Dist-0	56	-
Ca21chr1_C_albicans_SC5314	2910018	2910474	MSPC_Peak_767;ID=orf19.4961;Name=orf19.4961;Peak-2911732-2913486;Summit-2910251-2910257;Dist--1476	inf	+
Ca21chr1_C_albicans_SC5314	2912083	2913824	MSPC_Peak_761;ID=orf19.4961;Name=orf19.4961;Peak-2911732-2913486;Summit-2912585-2912586;Dist-0	inf	+
Ca21chr1_C_albicans_SC5314	2912083	2913824	MSPC_Peak_761;ID=orf19.4961;Name=orf19.4961;Peak-2911732-2913486;Summit-2913444-2913445;Dist-0	inf	+
Ca21chr1_C_albicans_SC5314	2928186	2928497	MSPC_Peak_756;ID=orf19.4969;Name=orf19.4969;Peak-2926204-2930787;Summit-2928366-2928367;Dist-0	20	-
Ca21chr1_C_albicans_SC5314	2942721	2943147	MSPC_Peak_750;ID=orf19.4975;Name=orf19.4975;Peak-2944794-2947553;Summit-2942914-2942916;Dist--1879	inf	+
Ca21chr1_C_albicans_SC5314	2942721	2943147	MSPC_Peak_750;ID=orf19.4975;Name=orf19.4975;Peak-2944794-2947553;Summit-2942946-2942947;Dist--1848	inf	+
Ca21chr1_C_albicans_SC5314	2943414	2943769	MSPC_Peak_742;ID=orf19.4975;Name=orf19.4975;Peak-2944794-2947553;Summit-2943591-2943592;Dist--1203	83	+
Ca21chr1_C_albicans_SC5314	2954840	2955558	MSPC_Peak_735;ID=orf19.4980;Name=orf19.4980;Peak-2955762-2957732;Summit-2955388-2955400;Dist--363	inf	+
Ca21chr1_C_albicans_SC5314	2955929	2956952	MSPC_Peak_720;ID=orf19.4980;Name=orf19.4980;Peak-2955762-2957732;Summit-2956274-2956275;Dist-0	156.161	+
Ca21chr1_C_albicans_SC5314	2955929	2956952	MSPC_Peak_720;ID=orf19.4980;Name=orf19.4980;Peak-2955762-2957732;Summit-2956363-2956364;Dist-0	156.161	+
Ca21chr1_C_albicans_SC5314	2955929	2956952	MSPC_Peak_720;ID=orf19.4980;Name=orf19.4980;Peak-2955762-2957732;Summit-2956949-2956950;Dist-0	156.161	+
Ca21chr1_C_albicans_SC5314	2960055	2960820	MSPC_Peak_713;ID=orf19.4981;Name=orf19.4981;Peak-2958018-2960132;Summit-2960395-2960396;Dist--264	inf	-
Ca21chr1_C_albicans_SC5314	2960055	2960820	MSPC_Peak_713;ID=orf19.4981;Name=orf19.4981;Peak-2958018-2960132;Summit-2960422-2960431;Dist--291	inf	-
Ca21chr1_C_albicans_SC5314	2973600	2974047	MSPC_Peak_709;ID=orf19.4991;Name=orf19.4991;Peak-2976356-2979172;Summit-2973805-2973807;Dist--2550	inf	+
Ca21chr1_C_albicans_SC5314	2973600	2974047	MSPC_Peak_709;ID=orf19.4991;Name=orf19.4991;Peak-2976356-2979172;Summit-2973833-2973834;Dist--2523	inf	+
Ca21chr1_C_albicans_SC5314	2987750	2988075	MSPC_Peak_702;ID=orf19.4997;Name=orf19.4997;Peak-2987795-2990032;Summit-2987870-2987871;Dist-0	31	-
Ca21chr1_C_albicans_SC5314	2990763	2991550	MSPC_Peak_695;ID=orf19.4997;Name=orf19.4997;Peak-2987795-2990032;Summit-2991265-2991287;Dist--1234	inf	-
Ca21chr1_C_albicans_SC5314	2992253	2996808	MSPC_Peak_685;ID=orf19.4998;Name=orf19.4998;Peak-2993348-2996389;Summit-2993748-2993749;Dist-0	207.315	+
Ca21chr1_C_albicans_SC5314	2992253	2996808	MSPC_Peak_685;ID=orf19.4998;Name=orf19.4998;Peak-2993348-2996389;Summit-2995857-2995858;Dist-0	207.315	+
Ca21chr1_C_albicans_SC5314	3008345	3008888	MSPC_Peak_678;ID=orf19.5005;Name=orf19.5005;Peak-3006473-3008419;Summit-3008360-3008361;Dist-0	62.822	+
Ca21chr1_C_albicans_SC5314	3008345	3008888	MSPC_Peak_678;ID=orf19.5006;Name=orf19.5006;Peak-3008491-3009024;Summit-3008706-3008707;Dist-0	62.822	-
Ca21chr1_C_albicans_SC5314	3009544	3009789	MSPC_Peak_672;ID=orf19.5006;Name=orf19.5006;Peak-3008491-3009024;Summit-3009602-3009603;Dist--579	41	-
Ca21chr1_C_albicans_SC5314	3011420	3013637	MSPC_Peak_666;ID=orf19.5007;Name=orf19.5007;Peak-3011464-3013252;Summit-3011872-3011873;Dist-0	inf	+
Ca21chr1_C_albicans_SC5314	3011420	3013637	MSPC_Peak_666;ID=orf19.5007;Name=orf19.5007;Peak-3011464-3013252;Summit-3011899-3011900;Dist-0	inf	+
Ca21chr1_C_albicans_SC5314	3011420	3013637	MSPC_Peak_666;ID=orf19.5007;Name=orf19.5007;Peak-3011464-3013252;Summit-3012740-3012741;Dist-0	inf	+
Ca21chr1_C_albicans_SC5314	3011420	3013637	MSPC_Peak_666;ID=orf19.5007;Name=orf19.5007;Peak-3011464-3013252;Summit-3013128-3013129;Dist-0	inf	+
Ca21chr1_C_albicans_SC5314	3027666	3028182	MSPC_Peak_661;ID=orf19.5015;Name=orf19.5015;Peak-3026140-3030825;Summit-3028120-3028121;Dist-0	33	+
Ca21chr1_C_albicans_SC5314	3029260	3029500	MSPC_Peak_652;ID=orf19.5015;Name=orf19.5015;Peak-3026140-3030825;Summit-3029359-3029360;Dist-0	28	+
Ca21chr1_C_albicans_SC5314	3029806	3030840	MSPC_Peak_644;ID=orf19.5015;Name=orf19.5015;Peak-3026140-3030825;Summit-3030177-3030178;Dist-0	80.716	+
Ca21chr1_C_albicans_SC5314	3029806	3030840	MSPC_Peak_644;ID=orf19.5015;Name=orf19.5015;Peak-3026140-3030825;Summit-3030268-3030269;Dist-0	80.716	+
Ca21chr1_C_albicans_SC5314	3034506	3034873	MSPC_Peak_636;ID=orf19.5019;Name=orf19.5019;Peak-3035261-3037345;Summit-3034595-3034596;Dist--666	167.103	+
Ca21chr1_C_albicans_SC5314	3034506	3034873	MSPC_Peak_636;ID=orf19.5019;Name=orf19.5019;Peak-3035261-3037345;Summit-3034650-3034670;Dist--592	167.103	+
Ca21chr1_C_albicans_SC5314	3035261	3035546	MSPC_Peak_628;ID=orf19.5019;Name=orf19.5019;Peak-3035261-3037345;Summit-3035418-3035419;Dist-0	28	+
Ca21chr1_C_albicans_SC5314	3038873	3039792	MSPC_Peak_623;ID=orf19.5021;Name=orf19.5021;Peak-3039105-3040358;Summit-3039426-3039427;Dist-0	299.157	-
Ca21chr1_C_albicans_SC5314	3038873	3039792	MSPC_Peak_623;ID=orf19.5021;Name=orf19.5021;Peak-3039105-3040358;Summit-3039459-3039460;Dist-0	299.157	-
Ca21chr1_C_albicans_SC5314	3041450	3043692	MSPC_Peak_608;ID=orf19.5022;Name=orf19.5022;Peak-3041593-3043548;Summit-3043392-3043393;Dist-0	88	+
Ca21chr1_C_albicans_SC5314	3045749	3046420	MSPC_Peak_601;ID=orf19.5024;Name=orf19.5024;Peak-3045995-3048182;Summit-3046388-3046389;Dist-0	42	-
Ca21chr1_C_albicans_SC5314	3047650	3048285	MSPC_Peak_595;ID=orf19.5024;Name=orf19.5024;Peak-3045995-3048182;Summit-3047666-3047667;Dist-0	211.902	-
Ca21chr1_C_albicans_SC5314	3047650	3048285	MSPC_Peak_595;ID=orf19.5024;Name=orf19.5024;Peak-3045995-3048182;Summit-3047715-3047716;Dist-0	211.902	-
Ca21chr1_C_albicans_SC5314	3047650	3048285	MSPC_Peak_595;ID=orf19.5024;Name=orf19.5024;Peak-3045995-3048182;Summit-3048145-3048146;Dist-0	211.902	-
Ca21chr1_C_albicans_SC5314	3049331	3049638	MSPC_Peak_585;ID=orf19.5024;Name=orf19.5024;Peak-3045995-3048182;Summit-3049515-3049516;Dist--1334	35	-
Ca21chr1_C_albicans_SC5314	3053718	3053960	MSPC_Peak_576;ID=orf19.5026;Name=orf19.5026;Peak-3053519-3057052;Summit-3053914-3053915;Dist-0	23	-
Ca21chr1_C_albicans_SC5314	3058632	3058884	MSPC_Peak_567;ID=orf19.5026;Name=orf19.5026;Peak-3053519-3057052;Summit-3058769-3058770;Dist--1718	53	-
Ca21chr1_C_albicans_SC5314	3060935	3061396	MSPC_Peak_559;ID=tA(AGC)7;Name=tA(AGC)7;Peak-3061122-3061194;Summit-3061176-3061184;Dist-0	inf	-
Ca21chr1_C_albicans_SC5314	3073355	3073608	MSPC_Peak_550;ID=orf19.5032;Name=orf19.5032;Peak-3074225-3075343;Summit-3073439-3073440;Dist--786	58	+
Ca21chr1_C_albicans_SC5314	3101888	3102218	MSPC_Peak_542;ID=orf19.7215;Name=orf19.7215;Peak-3099412-3104868;Summit-3102013-3102014;Dist-0	79	+
Ca21chr1_C_albicans_SC5314	3113549	3116830	MSPC_Peak_534;ID=orf19.7219;Name=orf19.7219;Peak-3113806-3114951;Summit-3113964-3113965;Dist-0	228.837	+
Ca21chr1_C_albicans_SC5314	3113549	3116830	MSPC_Peak_534;ID=orf19.7219;Name=orf19.7219;Peak-3113806-3114951;Summit-3114644-3114657;Dist-0	228.837	+
Ca21chr1_C_albicans_SC5314	3119805	3120989	MSPC_Peak_526;ID=orf19.7222;Name=orf19.7222;Peak-3119961-3120326;Summit-3120598-3120599;Dist--273	inf	-
Ca21chr1_C_albicans_SC5314	3119805	3120989	MSPC_Peak_526;ID=orf19.7222;Name=orf19.7222;Peak-3119961-3120326;Summit-3120638-3120658;Dist--313	inf	-
Ca21chr1_C_albicans_SC5314	3128638	3129042	MSPC_Peak_520;ID=orf19.7229;Name=orf19.7229;Peak-3128865-3131465;Summit-3128964-3128965;Dist-0	45	-
Ca21chr1_C_albicans_SC5314	3158228	3158789	MSPC_Peak_513;ID=orf19.7247;Name=orf19.7247;Peak-3158672-3160657;Summit-3158753-3158754;Dist-0	55	-
Ca21chr1_C_albicans_SC5314	3160313	3160659	MSPC_Peak_503;ID=orf19.7247;Name=orf19.7247;Peak-3158672-3160657;Summit-3160496-3160497;Dist-0	94	-
Ca21chr1_C_albicans_SC5314	3160975	3161540	MSPC_Peak_485;ID=orf19.7247;Name=orf19.7247;Peak-3158672-3160657;Summit-3161101-3161102;Dist--445	inf	-
Ca21chr1_C_albicans_SC5314	3160975	3161540	MSPC_Peak_485;ID=orf19.7247;Name=orf19.7247;Peak-3158672-3160657;Summit-3161138-3161147;Dist--482	inf	-
Ca21chr1_C_albicans_SC5314	3173077	3173335	MSPC_Peak_476;ID=orf19.7261;Name=orf19.7261;Peak-3171846-3173195;Summit-3173133-3173134;Dist-0	37	-
Ca21chr1_C_albicans_SC5314	3187589	3188475	MSPC_Peak_462;ID=orf19.7276.1;Name=orf19.7276.1;Peak-3186670-3186870;Summit-3187643-3187644;Dist--774	inf	-
Ca21chr1_C_albicans_SC5314	3187589	3188475	MSPC_Peak_462;ID=orf19.7278;Name=orf19.7278;Peak-3187867-3188547;Summit-3188180-3188181;Dist-0	inf	-
Ca21chr2_C_albicans_SC5314	899	1989	MSPC_Peak_946;ID=orf19.1925;Name=orf19.1925;Peak-4248-4778;Summit-1008-1009;Dist--3240	inf	+
Ca21chr2_C_albicans_SC5314	899	1989	MSPC_Peak_946;ID=orf19.1925;Name=orf19.1925;Peak-4248-4778;Summit-1030-1031;Dist--3218	inf	+
Ca21chr2_C_albicans_SC5314	4004	4363	MSPC_Peak_942;ID=orf19.1925;Name=orf19.1925;Peak-4248-4778;Summit-4220-4221;Dist--28	98	+
Ca21chr2_C_albicans_SC5314	7296	7558	MSPC_Peak_938;ID=tV(CAC)1;Name=tV(CAC)1;Peak-7396-7467;Summit-7405-7406;Dist-0	119	-
Ca21chr2_C_albicans_SC5314	17817	18586	MSPC_Peak_934;ID=orf19.1907;Name=orf19.1907;Peak-15457-17610;Summit-18113-18115;Dist--504	inf	-
Ca21chr2_C_albicans_SC5314	26460	26772	MSPC_Peak_926;ID=orf19.2113;Name=orf19.2113;Peak-26038-27426;Summit-26634-26635;Dist-0	30	-
Ca21chr2_C_albicans_SC5314	28213	29367	MSPC_Peak_922;ID=orf19.2111;Name=orf19.2111;Peak-28906-30051;Summit-28938-28941;Dist-0	inf	-
Ca21chr2_C_albicans_SC5314	28213	29367	MSPC_Peak_922;ID=orf19.2111;Name=orf19.2111;Peak-28906-30051;Summit-28990-28991;Dist-0	inf	-
Ca21chr2_C_albicans_SC5314	32784	34035	MSPC_Peak_918;ID=orf19.2107.1;Name=orf19.2107.1;Peak-33351-33620;Summit-33617-33618;Dist-0	inf	+
Ca21chr2_C_albicans_SC5314	32784	34035	MSPC_Peak_918;ID=orf19.2108;Name=orf19.2108;Peak-31637-32587;Summit-33650-33651;Dist--1064	inf	-
Ca21chr2_C_albicans_SC5314	38923	39759	MSPC_Peak_915;ID=orf19.2101;Name=orf19.2101;Peak-38528-39127;Summit-39082-39083;Dist-0	62	+
Ca21chr2_C_albicans_SC5314	47543	48195	MSPC_Peak_911;ID=orf19.2095;Name=orf19.2095;Peak-47587-49686;Summit-47768-47769;Dist-0	39	-
Ca21chr2_C_albicans_SC5314	74356	74682	MSPC_Peak_906;ID=orf19.2081;Name=orf19.2081;Peak-70672-74457;Summit-74402-74403;Dist-0	28	+
Ca21chr2_C_albicans_SC5314	92382	94086	MSPC_Peak_902;ID=orf19.2069;Name=orf19.2069;Peak-92559-94103;Summit-93190-93191;Dist-0	105.603	-
Ca21chr2_C_albicans_SC5314	92382	94086	MSPC_Peak_902;ID=orf19.2069;Name=orf19.2069;Peak-92559-94103;Summit-93778-93779;Dist-0	105.603	-
Ca21chr2_C_albicans_SC5314	110931	112109	MSPC_Peak_899;ID=orf19.2061;Name=orf19.2061;Peak-110767-111087;Summit-111205-111206;Dist--119	inf	-
Ca21chr2_C_albicans_SC5314	110931	112109	MSPC_Peak_899;ID=orf19.2061;Name=orf19.2061;Peak-110767-111087;Summit-111319-111320;Dist--233	inf	-
Ca21chr2_C_albicans_SC5314	112441	114236	MSPC_Peak_896;ID=orf19.2060;Name=orf19.2060;Peak-111326-112012;Summit-112868-112885;Dist--857	inf	-
Ca21chr2_C_albicans_SC5314	123051	123594	MSPC_Peak_891;ID=orf19.2054;Name=orf19.2054;Peak-121294-122850;Summit-123159-123160;Dist--310	inf	-
Ca21chr2_C_albicans_SC5314	123051	123594	MSPC_Peak_891;ID=orf19.2054;Name=orf19.2054;Peak-121294-122850;Summit-123182-123183;Dist--333	inf	-
Ca21chr2_C_albicans_SC5314	123051	123594	MSPC_Peak_891;ID=orf19.2054;Name=orf19.2054;Peak-121294-122850;Summit-123225-123226;Dist--376	inf	-
Ca21chr2_C_albicans_SC5314	127290	127536	MSPC_Peak_886;ID=orf19.2050;Name=orf19.2050;Peak-127133-128755;Summit-127442-127443;Dist-0	26	-
Ca21chr2_C_albicans_SC5314	157705	160013	MSPC_Peak_882;ID=orf19.2028;Name=orf19.2028;Peak-157873-158430;Summit-158673-158674;Dist--244	162.129	-
Ca21chr2_C_albicans_SC5314	157705	160013	MSPC_Peak_882;ID=orf19.2026;Name=orf19.2026;Peak-158693-160795;Summit-159118-159119;Dist-0	162.129	-
Ca21chr2_C_albicans_SC5314	157705	160013	MSPC_Peak_882;ID=orf19.2026;Name=orf19.2026;Peak-158693-160795;Summit-159299-159300;Dist-0	162.129	-
Ca21chr2_C_albicans_SC5314	164327	166431	MSPC_Peak_880;ID=orf19.2023;Name=orf19.2023;Peak-164467-166107;Summit-165192-165193;Dist-0	inf	+
Ca21chr2_C_albicans_SC5314	164327	166431	MSPC_Peak_880;ID=orf19.2023;Name=orf19.2023;Peak-164467-166107;Summit-165650-165651;Dist-0	inf	+
Ca21chr2_C_albicans_SC5314	170209	172396	MSPC_Peak_875;ID=orf19.2020;Name=orf19.2020;Peak-170217-171869;Summit-171051-171055;Dist-0	inf	+
Ca21chr2_C_albicans_SC5314	175739	176233	MSPC_Peak_870;ID=tL(CAA)2;Name=tL(CAA)2;Peak-175924-176042;Summit-175956-175972;Dist-0	inf	-
Ca21chr2_C_albicans_SC5314	177063	177644	MSPC_Peak_861;ID=orf19.2016;Name=orf19.2016;Peak-176520-176936;Summit-177310-177311;Dist--375	144.469	-
Ca21chr2_C_albicans_SC5314	177063	177644	MSPC_Peak_861;ID=orf19.2016;Name=orf19.2016;Peak-176520-176936;Summit-177513-177514;Dist--578	144.469	-
Ca21chr2_C_albicans_SC5314	178261	178683	MSPC_Peak_855;ID=orf19.2014;Name=orf19.2014;Peak-178316-179692;Summit-178394-178395;Dist-0	92.658	-
Ca21chr2_C_albicans_SC5314	178261	178683	MSPC_Peak_855;ID=orf19.2014;Name=orf19.2014;Peak-178316-179692;Summit-178517-178518;Dist-0	92.658	-
Ca21chr2_C_albicans_SC5314	180824	181862	MSPC_Peak_851;ID=orf19.2013;Name=orf19.2013;Peak-180800-182863;Summit-181744-181745;Dist-0	48	+
Ca21chr2_C_albicans_SC5314	182267	183071	MSPC_Peak_846;ID=orf19.2013;Name=orf19.2013;Peak-180800-182863;Summit-182579-182580;Dist-0	151.449	+
Ca21chr2_C_albicans_SC5314	182267	183071	MSPC_Peak_846;ID=orf19.2013;Name=orf19.2013;Peak-180800-182863;Summit-182696-182697;Dist-0	151.449	+
Ca21chr2_C_albicans_SC5314	195091	198276	MSPC_Peak_841;ID=orf19.2005;Name=orf19.2005;Peak-195380-198415;Summit-196429-196430;Dist-0	238.255	-
Ca21chr2_C_albicans_SC5314	195091	198276	MSPC_Peak_841;ID=orf19.2005;Name=orf19.2005;Peak-195380-198415;Summit-197862-197863;Dist-0	238.255	-
Ca21chr2_C_albicans_SC5314	199443	201058	MSPC_Peak_838;ID=orf19.2005;Name=orf19.2005;Peak-195380-198415;Summit-199581-199582;Dist--1167	inf	-
Ca21chr2_C_albicans_SC5314	199443	201058	MSPC_Peak_838;ID=orf19.2005;Name=orf19.2005;Peak-195380-198415;Summit-199675-199676;Dist--1261	inf	-
Ca21chr2_C_albicans_SC5314	199443	201058	MSPC_Peak_838;ID=orf19.2005;Name=orf19.2005;Peak-195380-198415;Summit-200047-200048;Dist--1633	inf	-
Ca21chr2_C_albicans_SC5314	199443	201058	MSPC_Peak_838;ID=orf19.2005;Name=orf19.2005;Peak-195380-198415;Summit-200527-200528;Dist--2113	inf	-
Ca21chr2_C_albicans_SC5314	203994	204688	MSPC_Peak_833;ID=orf19.2002;Name=orf19.2002;Peak-204929-207811;Summit-204351-204352;Dist--578	inf	+
Ca21chr2_C_albicans_SC5314	203994	204688	MSPC_Peak_833;ID=orf19.2002;Name=orf19.2002;Peak-204929-207811;Summit-204383-204392;Dist--538	inf	+
Ca21chr2_C_albicans_SC5314	216145	217094	MSPC_Peak_828;ID=tL(UAA)1;Name=tL(UAA)1;Peak-216930-217045;Summit-216935-216944;Dist-0	inf	-
Ca21chr2_C_albicans_SC5314	219065	221416	MSPC_Peak_824;ID=orf19.1995;Name=orf19.1995;Peak-219320-221449;Summit-219561-219562;Dist-0	245.243	-
Ca21chr2_C_albicans_SC5314	219065	221416	MSPC_Peak_824;ID=orf19.1995;Name=orf19.1995;Peak-219320-221449;Summit-219918-219919;Dist-0	245.243	-
Ca21chr2_C_albicans_SC5314	221778	222436	MSPC_Peak_820;ID=orf19.1995;Name=orf19.1995;Peak-219320-221449;Summit-221918-221919;Dist--470	inf	-
Ca21chr2_C_albicans_SC5314	221778	222436	MSPC_Peak_820;ID=orf19.1995;Name=orf19.1995;Peak-219320-221449;Summit-221944-221945;Dist--496	inf	-
Ca21chr2_C_albicans_SC5314	221778	222436	MSPC_Peak_820;ID=orf19.1995;Name=orf19.1995;Peak-219320-221449;Summit-222150-222151;Dist--702	inf	-
Ca21chr2_C_albicans_SC5314	228030	228567	MSPC_Peak_813;ID=orf19.1992;Name=orf19.1992;Peak-227572-229131;Summit-228290-228291;Dist-0	23	-
Ca21chr2_C_albicans_SC5314	229091	230131	MSPC_Peak_809;ID=orf19.1992;Name=orf19.1992;Peak-227572-229131;Summit-229556-229564;Dist--426	inf	-
Ca21chr2_C_albicans_SC5314	230839	231418	MSPC_Peak_803;ID=orf19.1991;Name=orf19.1991;Peak-230504-232237;Summit-230919-230920;Dist-0	36	+
Ca21chr2_C_albicans_SC5314	248948	250284	MSPC_Peak_795;ID=orf19.1446;Name=orf19.1446;Peak-249030-250508;Summit-249167-249168;Dist-0	102.615	-
Ca21chr2_C_albicans_SC5314	248948	250284	MSPC_Peak_795;ID=orf19.1446;Name=orf19.1446;Peak-249030-250508;Summit-249354-249355;Dist-0	102.615	-
Ca21chr2_C_albicans_SC5314	251921	252675	MSPC_Peak_788;ID=orf19.1446;Name=orf19.1446;Peak-249030-250508;Summit-252371-252389;Dist--1864	262.719	-
Ca21chr2_C_albicans_SC5314	253235	253497	MSPC_Peak_773;ID=orf19.1446;Name=orf19.1446;Peak-249030-250508;Summit-253311-253312;Dist--2804	36	-
Ca21chr2_C_albicans_SC5314	284398	285869	MSPC_Peak_765;ID=orf19.1467;Name=orf19.1467;Peak-284229-284633;Summit-284573-284574;Dist-0	197.336	+
Ca21chr2_C_albicans_SC5314	284398	285869	MSPC_Peak_765;ID=orf19.1471;Name=orf19.1471;Peak-289905-290378;Summit-284768-284769;Dist--5137	197.336	+
Ca21chr2_C_albicans_SC5314	287539	288676	MSPC_Peak_760;ID=orf19.1470;Name=orf19.1470;Peak-287869-288228;Summit-287879-287880;Dist-0	inf	-
Ca21chr2_C_albicans_SC5314	287539	288676	MSPC_Peak_760;ID=orf19.1470;Name=orf19.1470;Peak-287869-288228;Summit-287929-287930;Dist-0	inf	-
Ca21chr2_C_albicans_SC5314	287539	288676	MSPC_Peak_760;ID=orf19.1470;Name=orf19.1470;Peak-287869-288228;Summit-287996-287997;Dist-0	inf	-
Ca21chr2_C_albicans_SC5314	289684	290799	MSPC_Peak_753;ID=orf19.1471;Name=orf19.1471;Peak-289905-290378;Summit-290265-290266;Dist-0	163	+
Ca21chr2_C_albicans_SC5314	314094	316164	MSPC_Peak_747;ID=orf19.1485;Name=orf19.1485;Peak-311825-312166;Summit-314548-314549;Dist--2383	inf	-
Ca21chr2_C_albicans_SC5314	314094	316164	MSPC_Peak_747;ID=orf19.1485;Name=orf19.1485;Peak-311825-312166;Summit-314583-314584;Dist--2418	inf	-
Ca21chr2_C_albicans_SC5314	314094	316164	MSPC_Peak_747;ID=orf19.1486;Name=orf19.1486;Peak-314676-315173;Summit-315071-315072;Dist-0	inf	-
Ca21chr2_C_albicans_SC5314	316711	317139	MSPC_Peak_740;ID=orf19.1486;Name=orf19.1486;Peak-314676-315173;Summit-316954-316955;Dist--1782	99.627	-
Ca21chr2_C_albicans_SC5314	316711	317139	MSPC_Peak_740;ID=orf19.1486;Name=orf19.1486;Peak-314676-315173;Summit-317076-317077;Dist--1904	99.627	-
Ca21chr2_C_albicans_SC5314	320196	320603	MSPC_Peak_734;ID=orf19.1486;Name=orf19.1486;Peak-314676-315173;Summit-320404-320412;Dist--5232	inf	-
Ca21chr2_C_albicans_SC5314	323237	324744	MSPC_Peak_729;ID=tL(CAA)1;Name=tL(CAA)1;Peak-323401-323519;Summit-323462-323465;Dist-0	inf	-
Ca21chr2_C_albicans_SC5314	325083	325968	MSPC_Peak_726;ID=tL(CAA)1;Name=tL(CAA)1;Peak-323401-323519;Summit-325269-325290;Dist--1751	inf	-
Ca21chr2_C_albicans_SC5314	360719	361846	MSPC_Peak_718;ID=orf19.1505;Name=orf19.1505;Peak-360900-361937;Summit-361096-361097;Dist-0	194.342	-
Ca21chr2_C_albicans_SC5314	360719	361846	MSPC_Peak_718;ID=orf19.1505;Name=orf19.1505;Peak-360900-361937;Summit-361187-361188;Dist-0	194.342	-
Ca21chr2_C_albicans_SC5314	362731	363086	MSPC_Peak_712;ID=orf19.1505;Name=orf19.1505;Peak-360900-361937;Summit-362855-362856;Dist--919	155.438	-
Ca21chr2_C_albicans_SC5314	362731	363086	MSPC_Peak_712;ID=orf19.1505;Name=orf19.1505;Peak-360900-361937;Summit-362917-362918;Dist--981	155.438	-
Ca21chr2_C_albicans_SC5314	363507	364495	MSPC_Peak_706;ID=orf19.1505;Name=orf19.1505;Peak-360900-361937;Summit-363634-363665;Dist--1698	inf	-
Ca21chr2_C_albicans_SC5314	363507	364495	MSPC_Peak_706;ID=orf19.1506;Name=orf19.1506;Peak-364198-364623;Summit-364187-364204;Dist-0	inf	-
Ca21chr2_C_albicans_SC5314	407388	407928	MSPC_Peak_699;ID=snR48;Name=snR48;Peak-407520-407623;Summit-407524-407531;Dist-0	273.684	+
Ca21chr2_C_albicans_SC5314	407388	407928	MSPC_Peak_699;ID=orf19.1525;Name=orf19.1525;Peak-408210-409406;Summit-407656-407657;Dist--554	273.684	+
Ca21chr2_C_albicans_SC5314	496134	496944	MSPC_Peak_692;ID=tV(AAC)1;Name=tV(AAC)1;Peak-496197-496270;Summit-496252-496253;Dist-0	inf	+
Ca21chr2_C_albicans_SC5314	496134	496944	MSPC_Peak_692;ID=orf19.1571;Name=orf19.1571;Peak-494311-495161;Summit-496276-496277;Dist--1116	inf	-
Ca21chr2_C_albicans_SC5314	522989	523326	MSPC_Peak_687;ID=orf19.1585;Name=orf19.1585;Peak-524084-525196;Summit-523129-523147;Dist--938	inf	+
Ca21chr2_C_albicans_SC5314	543424	543935	MSPC_Peak_670;ID=orf19.5834;Name=orf19.5834;Peak-542346-545354;Summit-543529-543530;Dist-0	40	+
Ca21chr2_C_albicans_SC5314	555204	555633	MSPC_Peak_663;ID=orf19.5828;Name=orf19.5828;Peak-553526-555679;Summit-555449-555450;Dist-0	37	+
Ca21chr2_C_albicans_SC5314	572962	574354	MSPC_Peak_657;ID=orf19.5818;Name=orf19.5818;Peak-573007-574035;Summit-573638-573639;Dist-0	inf	+
Ca21chr2_C_albicans_SC5314	572962	574354	MSPC_Peak_657;ID=orf19.5818;Name=orf19.5818;Peak-573007-574035;Summit-573948-573949;Dist-0	inf	+
Ca21chr2_C_albicans_SC5314	591485	593044	MSPC_Peak_651;ID=orf19.5806;Name=orf19.5806;Peak-591488-592987;Summit-591656-591657;Dist-0	252.752	-
Ca21chr2_C_albicans_SC5314	591485	593044	MSPC_Peak_651;ID=orf19.5806;Name=orf19.5806;Peak-591488-592987;Summit-591728-591729;Dist-0	252.752	-
Ca21chr2_C_albicans_SC5314	591485	593044	MSPC_Peak_651;ID=orf19.5806;Name=orf19.5806;Peak-591488-592987;Summit-592256-592257;Dist-0	252.752	-
Ca21chr2_C_albicans_SC5314	603248	604793	MSPC_Peak_646;ID=orf19.5802;Name=orf19.5802;Peak-602098-603138;Summit-603512-603513;Dist--375	inf	-
Ca21chr2_C_albicans_SC5314	603248	604793	MSPC_Peak_646;ID=orf19.5801;Name=orf19.5801;Peak-603543-604784;Summit-603701-603702;Dist-0	inf	-
Ca21chr2_C_albicans_SC5314	621813	622192	MSPC_Peak_639;ID=orf19.5791;Name=orf19.5791;Peak-620950-622059;Summit-622019-622020;Dist-0	42	+
Ca21chr2_C_albicans_SC5314	623556	624969	MSPC_Peak_633;ID=orf19.5788;Name=orf19.5788;Peak-623592-626320;Summit-624879-624880;Dist-0	87	+
Ca21chr2_C_albicans_SC5314	625232	625683	MSPC_Peak_626;ID=orf19.5788;Name=orf19.5788;Peak-623592-626320;Summit-625512-625513;Dist-0	40	+
Ca21chr2_C_albicans_SC5314	626094	626599	MSPC_Peak_621;ID=orf19.5788;Name=orf19.5788;Peak-623592-626320;Summit-626169-626170;Dist-0	123	+
Ca21chr2_C_albicans_SC5314	650493	650743	MSPC_Peak_612;ID=orf19.5776;Name=orf19.5776;Peak-644362-654222;Summit-650520-650521;Dist-0	17	-
Ca21chr2_C_albicans_SC5314	658660	658912	MSPC_Peak_605;ID=orf19.5776;Name=orf19.5776;Peak-644362-654222;Summit-658858-658859;Dist--4637	32	-
Ca21chr2_C_albicans_SC5314	723484	724083	MSPC_Peak_599;ID=orf19.874;Name=orf19.874;Peak-722087-723193;Summit-723665-723684;Dist--473	172.394	-
Ca21chr2_C_albicans_SC5314	727187	727524	MSPC_Peak_591;ID=orf19.872;Name=orf19.872;Peak-725313-726593;Summit-727219-727220;Dist--627	37.042	-
Ca21chr2_C_albicans_SC5314	727187	727524	MSPC_Peak_591;ID=orf19.872;Name=orf19.872;Peak-725313-726593;Summit-727485-727486;Dist--893	37.042	-
Ca21chr2_C_albicans_SC5314	731993	732827	MSPC_Peak_586;ID=orf19.872;Name=orf19.872;Peak-725313-726593;Summit-732508-732514;Dist--5916	inf	-
Ca21chr2_C_albicans_SC5314	735604	736142	MSPC_Peak_568;ID=orf19.872;Name=orf19.872;Peak-725313-726593;Summit-735808-735810;Dist--9216	inf	-
Ca21chr2_C_albicans_SC5314	735604	736142	MSPC_Peak_568;ID=orf19.872;Name=orf19.872;Peak-725313-726593;Summit-735851-735852;Dist--9259	inf	-
Ca21chr2_C_albicans_SC5314	737146	738587	MSPC_Peak_563;ID=orf19.867;Name=orf19.867;Peak-747283-748896;Summit-737766-737772;Dist--9512	inf	+
Ca21chr2_C_albicans_SC5314	738933	742451	MSPC_Peak_556;ID=orf19.867;Name=orf19.867;Peak-747283-748896;Summit-739466-739478;Dist--7806	inf	+
Ca21chr2_C_albicans_SC5314	738933	742451	MSPC_Peak_556;ID=orf19.868;Name=orf19.868;Peak-740829-742466;Summit-740839-740840;Dist-0	inf	-
Ca21chr2_C_albicans_SC5314	738933	742451	MSPC_Peak_556;ID=orf19.868;Name=orf19.868;Peak-740829-742466;Summit-740877-740878;Dist-0	inf	-
Ca21chr2_C_albicans_SC5314	738933	742451	MSPC_Peak_556;ID=orf19.868;Name=orf19.868;Peak-740829-742466;Summit-742355-742356;Dist-0	inf	-
Ca21chr2_C_albicans_SC5314	771652	772048	MSPC_Peak_551;ID=tE(CUC)1;Name=tE(CUC)1;Peak-771813-771884;Summit-771826-771853;Dist-0	inf	+
Ca21chr2_C_albicans_SC5314	790158	790561	MSPC_Peak_545;ID=tF(GAA)2;Name=tF(GAA)2;Peak-790342-790429;Summit-790376-790377;Dist-0	inf	+
Ca21chr2_C_albicans_SC5314	801782	802195	MSPC_Peak_540;ID=orf19.842;Name=orf19.842;Peak-801181-801525;Summit-801868-801869;Dist--344	inf	-
Ca21chr2_C_albicans_SC5314	801782	802195	MSPC_Peak_540;ID=orf19.842;Name=orf19.842;Peak-801181-801525;Summit-801908-801915;Dist--384	inf	-
Ca21chr2_C_albicans_SC5314	804100	805360	MSPC_Peak_535;ID=orf19.840;Name=orf19.840;Peak-804502-805314;Summit-804562-804563;Dist-0	inf	-
Ca21chr2_C_albicans_SC5314	804100	805360	MSPC_Peak_535;ID=orf19.840;Name=orf19.840;Peak-804502-805314;Summit-804590-804612;Dist-0	inf	-
Ca21chr2_C_albicans_SC5314	805615	806918	MSPC_Peak_529;ID=orf19.838.1;Name=orf19.838.1;Peak-805800-806857;Summit-805866-805867;Dist-0	inf	-
Ca21chr2_C_albicans_SC5314	805615	806918	MSPC_Peak_529;ID=orf19.838.1;Name=orf19.838.1;Peak-805800-806857;Summit-805933-805934;Dist-0	inf	-
Ca21chr2_C_albicans_SC5314	805615	806918	MSPC_Peak_529;ID=orf19.838.1;Name=orf19.838.1;Peak-805800-806857;Summit-806312-806313;Dist-0	inf	-
Ca21chr2_C_albicans_SC5314	810328	810679	MSPC_Peak_523;ID=tF(GAA)3;Name=tF(GAA)3;Peak-810492-810579;Summit-810493-810494;Dist-0	inf	+
Ca21chr2_C_albicans_SC5314	829453	829724	MSPC_Peak_518;ID=orf19.828;Name=orf19.828;Peak-830516-831313;Summit-829557-829558;Dist--959	210.309	+
Ca21chr2_C_albicans_SC5314	829453	829724	MSPC_Peak_518;ID=orf19.828;Name=orf19.828;Peak-830516-831313;Summit-829585-829586;Dist--931	210.309	+
Ca21chr2_C_albicans_SC5314	831615	832781	MSPC_Peak_512;ID=orf19.827.1;Name=orf19.827.1;Peak-831684-832408;Summit-832254-832255;Dist-0	inf	+
Ca21chr2_C_albicans_SC5314	831615	832781	MSPC_Peak_512;ID=orf19.827.1;Name=orf19.827.1;Peak-831684-832408;Summit-832330-832331;Dist-0	inf	+
Ca21chr2_C_albicans_SC5314	831615	832781	MSPC_Peak_512;ID=orf19.827;Name=orf19.827;Peak-832828-833565;Summit-832548-832549;Dist--280	inf	+
Ca21chr2_C_albicans_SC5314	833808	834380	MSPC_Peak_506;ID=orf19.825;Name=orf19.825;Peak-836207-837304;Summit-833957-833958;Dist--2250	inf	+
Ca21chr2_C_albicans_SC5314	833808	834380	MSPC_Peak_506;ID=orf19.825;Name=orf19.825;Peak-836207-837304;Summit-833990-833991;Dist--2217	inf	+
Ca21chr2_C_albicans_SC5314	833808	834380	MSPC_Peak_506;ID=orf19.825;Name=orf19.825;Peak-836207-837304;Summit-834030-834031;Dist--2177	inf	+
Ca21chr2_C_albicans_SC5314	837904	839477	MSPC_Peak_498;ID=orf19.822;Name=orf19.822;Peak-838191-838760;Summit-838256-838264;Dist-0	inf	-
Ca21chr2_C_albicans_SC5314	837904	839477	MSPC_Peak_498;ID=orf19.822;Name=orf19.822;Peak-838191-838760;Summit-839075-839076;Dist--316	inf	-
Ca21chr2_C_albicans_SC5314	837904	839477	MSPC_Peak_498;ID=orf19.822;Name=orf19.822;Peak-838191-838760;Summit-839137-839138;Dist--378	inf	-
Ca21chr2_C_albicans_SC5314	837904	839477	MSPC_Peak_498;ID=orf19.820;Name=orf19.820;Peak-839158-840282;Summit-839180-839181;Dist-0	inf	-
Ca21chr2_C_albicans_SC5314	847380	853450	MSPC_Peak_492;ID=orf19.815;Name=orf19.815;Peak-847659-853403;Summit-847723-847724;Dist-0	inf	-
Ca21chr2_C_albicans_SC5314	847380	853450	MSPC_Peak_492;ID=orf19.815;Name=orf19.815;Peak-847659-853403;Summit-847757-847758;Dist-0	inf	-
Ca21chr2_C_albicans_SC5314	847380	853450	MSPC_Peak_492;ID=orf19.815;Name=orf19.815;Peak-847659-853403;Summit-848511-848512;Dist-0	inf	-
Ca21chr2_C_albicans_SC5314	847380	853450	MSPC_Peak_492;ID=orf19.815;Name=orf19.815;Peak-847659-853403;Summit-852248-852249;Dist-0	inf	-
Ca21chr2_C_albicans_SC5314	847380	853450	MSPC_Peak_492;ID=orf19.815;Name=orf19.815;Peak-847659-853403;Summit-852418-852419;Dist-0	inf	-
Ca21chr2_C_albicans_SC5314	853845	854948	MSPC_Peak_486;ID=orf19.815;Name=orf19.815;Peak-847659-853403;Summit-854146-854147;Dist--744	inf	-
Ca21chr2_C_albicans_SC5314	853845	854948	MSPC_Peak_486;ID=orf19.815;Name=orf19.815;Peak-847659-853403;Summit-854182-854201;Dist--780	inf	-
Ca21chr2_C_albicans_SC5314	857615	858237	MSPC_Peak_480;ID=SNRNAU2;Name=SNRNAU2;Peak-857832-858046;Summit-857838-857839;Dist-0	inf	-
Ca21chr2_C_albicans_SC5314	857615	858237	MSPC_Peak_480;ID=SNRNAU2;Name=SNRNAU2;Peak-857832-858046;Summit-857895-857902;Dist-0	inf	-
Ca21chr2_C_albicans_SC5314	876494	876826	MSPC_Peak_473;ID=orf19.806;Name=orf19.806;Peak-874972-875328;Summit-876671-876672;Dist--1344	37	-
Ca21chr2_C_albicans_SC5314	899958	900276	MSPC_Peak_457;ID=orf19.792;Name=orf19.792;Peak-897896-900774;Summit-900215-900216;Dist-0	21	+
Ca21chr2_C_albicans_SC5314	902927	903872	MSPC_Peak_451;ID=orf19.1591;Name=orf19.1591;Peak-902615-903823;Summit-903677-903678;Dist-0	85	+
Ca21chr2_C_albicans_SC5314	960960	961997	MSPC_Peak_445;ID=orf19.4490.2;Name=orf19.4490.2;Peak-959964-960251;Summit-961400-961401;Dist--1150	inf	-
Ca21chr2_C_albicans_SC5314	960960	961997	MSPC_Peak_445;ID=orf19.4490;Name=orf19.4490;Peak-961440-961997;Summit-961453-961454;Dist-0	inf	-
Ca21chr2_C_albicans_SC5314	960960	961997	MSPC_Peak_445;ID=orf19.4490;Name=orf19.4490;Peak-961440-961997;Summit-961515-961516;Dist-0	inf	-
Ca21chr2_C_albicans_SC5314	965526	968483	MSPC_Peak_404;ID=orf19.4488;Name=orf19.4488;Peak-965502-968417;Summit-966386-966387;Dist-0	205.319	+
Ca21chr2_C_albicans_SC5314	965526	968483	MSPC_Peak_404;ID=orf19.4488;Name=orf19.4488;Peak-965502-968417;Summit-967779-967780;Dist-0	205.319	+
Ca21chr2_C_albicans_SC5314	1023914	1025169	MSPC_Peak_400;ID=tD(GUC)5;Name=tD(GUC)5;Peak-1024084-1024155;Summit-1024363-1024393;Dist--209	inf	-
Ca21chr2_C_albicans_SC5314	1026408	1027449	MSPC_Peak_396;ID=tG(GCC)3;Name=tG(GCC)3;Peak-1027235-1027305;Summit-1027070-1027071;Dist--165	inf	+
Ca21chr2_C_albicans_SC5314	1026408	1027449	MSPC_Peak_396;ID=tG(GCC)3;Name=tG(GCC)3;Peak-1027235-1027305;Summit-1027126-1027127;Dist--109	inf	+
Ca21chr2_C_albicans_SC5314	1026408	1027449	MSPC_Peak_396;ID=tG(GCC)3;Name=tG(GCC)3;Peak-1027235-1027305;Summit-1027179-1027180;Dist--56	inf	+
Ca21chr2_C_albicans_SC5314	1042318	1042761	MSPC_Peak_390;ID=tT(AGU)4;Name=tT(AGU)4;Peak-1042518-1042590;Summit-1042554-1042557;Dist-0	inf	+
Ca21chr2_C_albicans_SC5314	1077347	1079211	MSPC_Peak_385;ID=tQ(UUG)3;Name=tQ(UUG)3;Peak-1077471-1077556;Summit-1077526-1077552;Dist-0	inf	-
Ca21chr2_C_albicans_SC5314	1082359	1082655	MSPC_Peak_380;ID=orf19.3555;Name=orf19.3555;Peak-1083888-1086293;Summit-1082515-1082516;Dist--1373	190.351	+
Ca21chr2_C_albicans_SC5314	1082359	1082655	MSPC_Peak_380;ID=orf19.3555;Name=orf19.3555;Peak-1083888-1086293;Summit-1082547-1082548;Dist--1341	190.351	+
Ca21chr2_C_albicans_SC5314	1085529	1086001	MSPC_Peak_376;ID=orf19.3555;Name=orf19.3555;Peak-1083888-1086293;Summit-1085677-1085678;Dist-0	43	+
Ca21chr2_C_albicans_SC5314	1091777	1092255	MSPC_Peak_369;ID=orf19.3559;Name=orf19.3559;Peak-1091873-1093099;Summit-1091975-1091976;Dist-0	48.927	-
Ca21chr2_C_albicans_SC5314	1091777	1092255	MSPC_Peak_369;ID=orf19.3559;Name=orf19.3559;Peak-1091873-1093099;Summit-1092096-1092097;Dist-0	48.927	-
Ca21chr2_C_albicans_SC5314	1110460	1111876	MSPC_Peak_364;ID=orf19.3572.3;Name=orf19.3572.3;Peak-1110528-1111348;Summit-1110539-1110540;Dist-0	inf	+
Ca21chr2_C_albicans_SC5314	1110460	1111876	MSPC_Peak_364;ID=orf19.3572.3;Name=orf19.3572.3;Peak-1110528-1111348;Summit-1111224-1111225;Dist-0	inf	+
Ca21chr2_C_albicans_SC5314	1110460	1111876	MSPC_Peak_364;ID=orf19.3572.3;Name=orf19.3572.3;Peak-1110528-1111348;Summit-1111305-1111306;Dist-0	inf	+
Ca21chr2_C_albicans_SC5314	1110460	1111876	MSPC_Peak_364;ID=orf19.3572.3;Name=orf19.3572.3;Peak-1110528-1111348;Summit-1111337-1111338;Dist-0	inf	+
Ca21chr2_C_albicans_SC5314	1112137	1112517	MSPC_Peak_361;ID=tI(AAU)3;Name=tI(AAU)3;Peak-1112294-1112380;Summit-1112337-1112345;Dist-0	inf	-
Ca21chr2_C_albicans_SC5314	1112137	1112517	MSPC_Peak_361;ID=tI(AAU)3;Name=tI(AAU)3;Peak-1112294-1112380;Summit-1112368-1112369;Dist-0	inf	-
Ca21chr2_C_albicans_SC5314	1118626	1119361	MSPC_Peak_357;ID=orf19.3575;Name=orf19.3575;Peak-1118746-1120260;Summit-1119244-1119245;Dist-0	34.076	+
Ca21chr2_C_albicans_SC5314	1118626	1119361	MSPC_Peak_357;ID=orf19.3575;Name=orf19.3575;Peak-1118746-1120260;Summit-1119358-1119359;Dist-0	34.076	+
Ca21chr2_C_albicans_SC5314	1120158	1120478	MSPC_Peak_351;ID=orf19.3575;Name=orf19.3575;Peak-1118746-1120260;Summit-1120166-1120168;Dist-0	56.864	+
Ca21chr2_C_albicans_SC5314	1132916	1133463	MSPC_Peak_341;ID=orf19.6869;Name=orf19.6869;Peak-1130953-1132002;Summit-1133164-1133189;Dist--1163	inf	-
Ca21chr2_C_albicans_SC5314	1141174	1141516	MSPC_Peak_335;ID=orf19.6872;Name=orf19.6872;Peak-1139328-1140248;Summit-1141514-1141515;Dist--1267	14	-
Ca21chr2_C_albicans_SC5314	1142446	1142765	MSPC_Peak_330;ID=orf19.6873;Name=orf19.6873;Peak-1141773-1142393;Summit-1142446-1142447;Dist--54	13	-
Ca21chr2_C_albicans_SC5314	1143753	1144201	MSPC_Peak_325;ID=tS(AGA)4;Name=tS(AGA)4;Peak-1143939-1144020;Summit-1143961-1143980;Dist-0	inf	-
Ca21chr2_C_albicans_SC5314	1145690	1147627	MSPC_Peak_320;ID=tS(AGA)4;Name=tS(AGA)4;Peak-1143939-1144020;Summit-1146620-1146621;Dist--2601	inf	-
Ca21chr2_C_albicans_SC5314	1145690	1147627	MSPC_Peak_320;ID=tS(AGA)4;Name=tS(AGA)4;Peak-1143939-1144020;Summit-1146654-1146657;Dist--2635	inf	-
Ca21chr2_C_albicans_SC5314	1145690	1147627	MSPC_Peak_320;ID=orf19.6874;Name=orf19.6874;Peak-1150098-1151921;Summit-1147290-1147291;Dist--2808	inf	+
Ca21chr2_C_albicans_SC5314	1145690	1147627	MSPC_Peak_320;ID=orf19.6874;Name=orf19.6874;Peak-1150098-1151921;Summit-1147448-1147449;Dist--2650	inf	+
Ca21chr2_C_albicans_SC5314	1163988	1164722	MSPC_Peak_314;ID=orf19.6881;Name=orf19.6881;Peak-1164161-1164808;Summit-1164195-1164196;Dist-0	265.209	-
Ca21chr2_C_albicans_SC5314	1163988	1164722	MSPC_Peak_314;ID=orf19.6881;Name=orf19.6881;Peak-1164161-1164808;Summit-1164342-1164343;Dist-0	265.209	-
Ca21chr2_C_albicans_SC5314	1165341	1165772	MSPC_Peak_308;ID=orf19.6882;Name=orf19.6882;Peak-1165501-1167012;Summit-1165700-1165715;Dist-0	132.506	+
Ca21chr2_C_albicans_SC5314	1166019	1168126	MSPC_Peak_305;ID=orf19.6882;Name=orf19.6882;Peak-1165501-1167012;Summit-1167009-1167010;Dist-0	inf	+
Ca21chr2_C_albicans_SC5314	1166019	1168126	MSPC_Peak_305;ID=orf19.6881;Name=orf19.6881;Peak-1164161-1164808;Summit-1167241-1167250;Dist--2434	inf	-
Ca21chr2_C_albicans_SC5314	1211943	1212462	MSPC_Peak_300;ID=orf19.5213.1;Name=orf19.5213.1;Peak-1211238-1211519;Summit-1212261-1212267;Dist--743	123.536	-
Ca21chr2_C_albicans_SC5314	1232733	1234881	MSPC_Peak_295;ID=orf19.4118;Name=orf19.4118;Peak-1232842-1234668;Summit-1234484-1234485;Dist-0	inf	+
Ca21chr2_C_albicans_SC5314	1232733	1234881	MSPC_Peak_295;ID=orf19.4117;Name=orf19.4117;Peak-1234911-1236344;Summit-1234685-1234686;Dist--226	inf	+
Ca21chr2_C_albicans_SC5314	1237808	1238122	MSPC_Peak_290;ID=tM(CAU)3;Name=tM(CAU)3;Peak-1237930-1238003;Summit-1237957-1237977;Dist-0	inf	-
Ca21chr2_C_albicans_SC5314	1302420	1303308	MSPC_Peak_285;ID=orf19.18;Name=orf19.18;Peak-1302340-1304152;Summit-1302758-1302759;Dist-0	122.539	-
Ca21chr2_C_albicans_SC5314	1302420	1303308	MSPC_Peak_285;ID=orf19.18;Name=orf19.18;Peak-1302340-1304152;Summit-1302985-1302986;Dist-0	122.539	-
Ca21chr2_C_albicans_SC5314	1321330	1321726	MSPC_Peak_280;ID=tI(AAU)1;Name=tI(AAU)1;Peak-1321524-1321610;Summit-1321541-1321542;Dist-0	inf	+
Ca21chr2_C_albicans_SC5314	1321330	1321726	MSPC_Peak_280;ID=tI(AAU)1;Name=tI(AAU)1;Peak-1321524-1321610;Summit-1321570-1321580;Dist-0	inf	+
Ca21chr2_C_albicans_SC5314	1332056	1333786	MSPC_Peak_276;ID=orf19.33;Name=orf19.33;Peak-1332647-1332952;Summit-1332890-1332891;Dist-0	inf	-
Ca21chr2_C_albicans_SC5314	1332056	1333786	MSPC_Peak_276;ID=orf19.33;Name=orf19.33;Peak-1332647-1332952;Summit-1332948-1332949;Dist-0	inf	-
Ca21chr2_C_albicans_SC5314	1338098	1338551	MSPC_Peak_273;ID=orf19.34;Name=orf19.34;Peak-1334306-1335865;Summit-1338313-1338314;Dist--2449	inf	-
Ca21chr2_C_albicans_SC5314	1338098	1338551	MSPC_Peak_273;ID=orf19.34;Name=orf19.34;Peak-1334306-1335865;Summit-1338335-1338340;Dist--2471	inf	-
Ca21chr2_C_albicans_SC5314	1339523	1340010	MSPC_Peak_270;ID=orf19.35;Name=orf19.35;Peak-1341149-1344079;Summit-1339714-1339717;Dist--1433	inf	+
Ca21chr2_C_albicans_SC5314	1339523	1340010	MSPC_Peak_270;ID=orf19.35;Name=orf19.35;Peak-1341149-1344079;Summit-1339780-1339781;Dist--1369	inf	+
Ca21chr2_C_albicans_SC5314	1341266	1342823	MSPC_Peak_261;ID=orf19.35;Name=orf19.35;Peak-1341149-1344079;Summit-1341720-1341721;Dist-0	98.632	+
Ca21chr2_C_albicans_SC5314	1341266	1342823	MSPC_Peak_261;ID=orf19.35;Name=orf19.35;Peak-1341149-1344079;Summit-1341870-1341871;Dist-0	98.632	+
Ca21chr2_C_albicans_SC5314	1343389	1344042	MSPC_Peak_254;ID=orf19.35;Name=orf19.35;Peak-1341149-1344079;Summit-1343517-1343518;Dist-0	86.686	+
Ca21chr2_C_albicans_SC5314	1343389	1344042	MSPC_Peak_254;ID=orf19.35;Name=orf19.35;Peak-1341149-1344079;Summit-1343702-1343703;Dist-0	86.686	+
Ca21chr2_C_albicans_SC5314	1364096	1364360	MSPC_Peak_249;ID=orf19.1224;Name=orf19.1224;Peak-1365218-1366075;Summit-1364338-1364339;Dist--880	27	+
Ca21chr2_C_albicans_SC5314	1365355	1366097	MSPC_Peak_243;ID=orf19.1224;Name=orf19.1224;Peak-1365218-1366075;Summit-1365770-1365771;Dist-0	150.452	+
Ca21chr2_C_albicans_SC5314	1365355	1366097	MSPC_Peak_243;ID=orf19.1224;Name=orf19.1224;Peak-1365218-1366075;Summit-1365916-1365917;Dist-0	150.452	+
Ca21chr2_C_albicans_SC5314	1377728	1378085	MSPC_Peak_239;ID=orf19.3149;Name=orf19.3149;Peak-1379510-1380463;Summit-1377977-1377978;Dist--1533	82.706	+
Ca21chr2_C_albicans_SC5314	1377728	1378085	MSPC_Peak_239;ID=orf19.3149;Name=orf19.3149;Peak-1379510-1380463;Summit-1378000-1378001;Dist--1510	82.706	+
Ca21chr2_C_albicans_SC5314	1379451	1380870	MSPC_Peak_234;ID=orf19.3149;Name=orf19.3149;Peak-1379510-1380463;Summit-1380234-1380235;Dist-0	inf	+
Ca21chr2_C_albicans_SC5314	1379451	1380870	MSPC_Peak_234;ID=orf19.3149;Name=orf19.3149;Peak-1379510-1380463;Summit-1380270-1380271;Dist-0	inf	+
Ca21chr2_C_albicans_SC5314	1395298	1396957	MSPC_Peak_231;ID=orf19.2232;Name=orf19.2232;Peak-1395602-1396519;Summit-1395646-1395658;Dist-0	inf	-
Ca21chr2_C_albicans_SC5314	1395298	1396957	MSPC_Peak_231;ID=orf19.2232;Name=orf19.2232;Peak-1395602-1396519;Summit-1395714-1395715;Dist-0	inf	-
Ca21chr2_C_albicans_SC5314	1442464	1442723	MSPC_Peak_226;ID=orf19.2261;Name=orf19.2261;Peak-1442849-1443628;Summit-1442706-1442707;Dist--143	66	+
Ca21chr2_C_albicans_SC5314	1459419	1460112	MSPC_Peak_221;ID=orf19.2270;Name=orf19.2270;Peak-1460029-1461783;Summit-1459714-1459715;Dist--315	61	+
Ca21chr2_C_albicans_SC5314	1461210	1461740	MSPC_Peak_216;ID=orf19.2270;Name=orf19.2270;Peak-1460029-1461783;Summit-1461614-1461615;Dist-0	27	+
Ca21chr2_C_albicans_SC5314	1497672	1498364	MSPC_Peak_210;ID=orf19.1902;Name=orf19.1902;Peak-1498605-1500293;Summit-1498005-1498006;Dist--600	303.151	+
Ca21chr2_C_albicans_SC5314	1497672	1498364	MSPC_Peak_210;ID=orf19.1902;Name=orf19.1902;Peak-1498605-1500293;Summit-1498100-1498101;Dist--505	303.151	+
Ca21chr2_C_albicans_SC5314	1508129	1509134	MSPC_Peak_205;ID=orf19.1896;Name=orf19.1896;Peak-1506984-1508930;Summit-1508828-1508829;Dist-0	96.64	+
Ca21chr2_C_albicans_SC5314	1508129	1509134	MSPC_Peak_205;ID=orf19.1890;Name=orf19.1890;Peak-1514712-1516178;Summit-1508941-1508942;Dist--5771	96.64	+
Ca21chr2_C_albicans_SC5314	1546228	1547691	MSPC_Peak_202;ID=orf19.1868;Name=orf19.1868;Peak-1546130-1547314;Summit-1547107-1547108;Dist-0	209.311	+
Ca21chr2_C_albicans_SC5314	1546228	1547691	MSPC_Peak_202;ID=orf19.1867;Name=orf19.1867;Peak-1547799-1548998;Summit-1547517-1547518;Dist--282	209.311	+
Ca21chr2_C_albicans_SC5314	1574938	1575658	MSPC_Peak_198;ID=orf19.2210;Name=orf19.2210;Peak-1572314-1574362;Summit-1575160-1575180;Dist--799	inf	-
Ca21chr2_C_albicans_SC5314	1600348	1600651	MSPC_Peak_193;ID=tM(CAU)2;Name=tM(CAU)2;Peak-1600445-1600516;Summit-1600470-1600486;Dist-0	inf	-
Ca21chr2_C_albicans_SC5314	1608157	1611905	MSPC_Peak_188;ID=orf19.2192;Name=orf19.2192;Peak-1608435-1611605;Summit-1609286-1609287;Dist-0	inf	+
Ca21chr2_C_albicans_SC5314	1608157	1611905	MSPC_Peak_188;ID=orf19.2192;Name=orf19.2192;Peak-1608435-1611605;Summit-1610403-1610404;Dist-0	inf	+
Ca21chr2_C_albicans_SC5314	1608157	1611905	MSPC_Peak_188;ID=orf19.2192;Name=orf19.2192;Peak-1608435-1611605;Summit-1611389-1611390;Dist-0	inf	+
Ca21chr2_C_albicans_SC5314	1608157	1611905	MSPC_Peak_188;ID=orf19.2192;Name=orf19.2192;Peak-1608435-1611605;Summit-1611569-1611570;Dist-0	inf	+
Ca21chr2_C_albicans_SC5314	1620138	1620542	MSPC_Peak_184;ID=tI(AAU)2;Name=tI(AAU)2;Peak-1620320-1620406;Summit-1620334-1620348;Dist-0	inf	+
Ca21chr2_C_albicans_SC5314	1620138	1620542	MSPC_Peak_184;ID=tI(AAU)2;Name=tI(AAU)2;Peak-1620320-1620406;Summit-1620378-1620379;Dist-0	inf	+
Ca21chr2_C_albicans_SC5314	1621505	1621964	MSPC_Peak_181;ID=tA(AGC)1;Name=tA(AGC)1;Peak-1621657-1621729;Summit-1621665-1621686;Dist-0	inf	+
Ca21chr2_C_albicans_SC5314	1633046	1634149	MSPC_Peak_177;ID=orf19.2180;Name=orf19.2180;Peak-1631660-1632775;Summit-1633386-1633387;Dist--612	inf	-
Ca21chr2_C_albicans_SC5314	1633046	1634149	MSPC_Peak_177;ID=orf19.2180;Name=orf19.2180;Peak-1631660-1632775;Summit-1633423-1633424;Dist--649	inf	-
Ca21chr2_C_albicans_SC5314	1633046	1634149	MSPC_Peak_177;ID=orf19.2179.2;Name=orf19.2179.2;Peak-1633446-1634121;Summit-1633503-1633504;Dist-0	inf	-
Ca21chr2_C_albicans_SC5314	1637776	1638328	MSPC_Peak_171;ID=RPR1;Name=RPR1;Peak-1637905-1638241;Summit-1638067-1638068;Dist-0	211	+
Ca21chr2_C_albicans_SC5314	1649626	1649878	MSPC_Peak_165;ID=orf19.2170;Name=orf19.2170;Peak-1649472-1652255;Summit-1649730-1649731;Dist-0	32	-
Ca21chr2_C_albicans_SC5314	1650208	1650905	MSPC_Peak_160;ID=orf19.2170;Name=orf19.2170;Peak-1649472-1652255;Summit-1650320-1650321;Dist-0	65.803	-
Ca21chr2_C_albicans_SC5314	1650208	1650905	MSPC_Peak_160;ID=orf19.2170;Name=orf19.2170;Peak-1649472-1652255;Summit-1650523-1650524;Dist-0	65.803	-
Ca21chr2_C_albicans_SC5314	1651848	1652107	MSPC_Peak_156;ID=orf19.2170;Name=orf19.2170;Peak-1649472-1652255;Summit-1652083-1652084;Dist-0	27	-
Ca21chr2_C_albicans_SC5314	1652807	1653464	MSPC_Peak_151;ID=orf19.2170;Name=orf19.2170;Peak-1649472-1652255;Summit-1653139-1653150;Dist--885	inf	-
Ca21chr2_C_albicans_SC5314	1675505	1678064	MSPC_Peak_146;ID=orf19.1352;Name=orf19.1352;Peak-1678514-1679068;Summit-1675994-1675996;Dist--2519	inf	+
Ca21chr2_C_albicans_SC5314	1675505	1678064	MSPC_Peak_146;ID=orf19.1353;Name=orf19.1353;Peak-1676646-1677182;Summit-1677827-1677828;Dist--646	inf	-
Ca21chr2_C_albicans_SC5314	1678500	1678933	MSPC_Peak_142;ID=orf19.1352;Name=orf19.1352;Peak-1678514-1679068;Summit-1678603-1678604;Dist-0	31	+
Ca21chr2_C_albicans_SC5314	1690412	1690646	MSPC_Peak_139;ID=orf19.1435;Name=orf19.1435;Peak-1690559-1691935;Summit-1690644-1690645;Dist-0	13	-
Ca21chr2_C_albicans_SC5314	1691720	1692008	MSPC_Peak_136;ID=orf19.1435;Name=orf19.1435;Peak-1690559-1691935;Summit-1691745-1691746;Dist-0	150.452	-
Ca21chr2_C_albicans_SC5314	1691720	1692008	MSPC_Peak_136;ID=orf19.1435;Name=orf19.1435;Peak-1690559-1691935;Summit-1691853-1691854;Dist-0	150.452	-
Ca21chr2_C_albicans_SC5314	1790294	1790646	MSPC_Peak_131;ID=orf19.3591;Name=orf19.3591;Peak-1788147-1789799;Summit-1790411-1790412;Dist--613	49	-
Ca21chr2_C_albicans_SC5314	1807268	1807617	MSPC_Peak_124;ID=orf19.218;Name=orf19.218;Peak-1807304-1807645;Summit-1807512-1807513;Dist-0	194	+
Ca21chr2_C_albicans_SC5314	1886054	1886404	MSPC_Peak_120;ID=tP(UGG)2;Name=tP(UGG)2;Peak-1888132-1888223;Summit-1886250-1886251;Dist--1882	156.435	+
Ca21chr2_C_albicans_SC5314	1886054	1886404	MSPC_Peak_120;ID=tP(UGG)2;Name=tP(UGG)2;Peak-1888132-1888223;Summit-1886281-1886282;Dist--1851	156.435	+
Ca21chr2_C_albicans_SC5314	1887946	1888576	MSPC_Peak_116;ID=tP(UGG)2;Name=tP(UGG)2;Peak-1888132-1888223;Summit-1888167-1888204;Dist-0	inf	+
Ca21chr2_C_albicans_SC5314	1890127	1890891	MSPC_Peak_113;ID=orf19.4082;Name=orf19.4082;Peak-1889969-1890607;Summit-1890436-1890437;Dist-0	93	+
Ca21chr2_C_albicans_SC5314	1921931	1922457	MSPC_Peak_109;ID=orf19.1601;Name=orf19.1601;Peak-1921934-1923103;Summit-1922344-1922345;Dist-0	54	+
Ca21chr2_C_albicans_SC5314	1922715	1923146	MSPC_Peak_105;ID=orf19.1601;Name=orf19.1601;Peak-1921934-1923103;Summit-1922925-1922926;Dist-0	17	+
Ca21chr2_C_albicans_SC5314	1935565	1936622	MSPC_Peak_102;ID=orf19.1604;Name=orf19.1604;Peak-1930310-1933514;Summit-1936315-1936318;Dist--2802	inf	-
Ca21chr2_C_albicans_SC5314	1935565	1936622	MSPC_Peak_102;ID=orf19.1604;Name=orf19.1604;Peak-1930310-1933514;Summit-1936343-1936344;Dist--2830	inf	-
Ca21chr2_C_albicans_SC5314	1949343	1949655	MSPC_Peak_98;ID=orf19.1402;Name=orf19.1402;Peak-1946280-1947860;Summit-1949487-1949488;Dist--1628	inf	-
Ca21chr2_C_albicans_SC5314	1949343	1949655	MSPC_Peak_98;ID=orf19.1402;Name=orf19.1402;Peak-1946280-1947860;Summit-1949521-1949522;Dist--1662	inf	-
Ca21chr2_C_albicans_SC5314	2030795	2032568	MSPC_Peak_95;ID=orf19.1358;Name=orf19.1358;Peak-2031301-2032272;Summit-2032010-2032011;Dist-0	inf	+
Ca21chr2_C_albicans_SC5314	2030795	2032568	MSPC_Peak_95;ID=orf19.1358;Name=orf19.1358;Peak-2031301-2032272;Summit-2032088-2032089;Dist-0	inf	+
Ca21chr2_C_albicans_SC5314	2034882	2036452	MSPC_Peak_92;ID=orf19.1357;Name=orf19.1357;Peak-2034842-2036386;Summit-2035968-2035969;Dist-0	242.248	+
Ca21chr2_C_albicans_SC5314	2034882	2036452	MSPC_Peak_92;ID=orf19.1357;Name=orf19.1357;Peak-2034842-2036386;Summit-2036298-2036299;Dist-0	242.248	+
Ca21chr2_C_albicans_SC5314	2053289	2053820	MSPC_Peak_86;ID=orf19.1779;Name=orf19.1779;Peak-2053567-2054703;Summit-2053699-2053702;Dist-0	246.241	-
Ca21chr2_C_albicans_SC5314	2054945	2055569	MSPC_Peak_82;ID=orf19.1779;Name=orf19.1779;Peak-2053567-2054703;Summit-2055279-2055285;Dist--577	inf	-
Ca21chr2_C_albicans_SC5314	2073826	2074234	MSPC_Peak_79;ID=orf19.1770;Name=orf19.1770;Peak-2074774-2075106;Summit-2073986-2074021;Dist--754	inf	+
Ca21chr2_C_albicans_SC5314	2074717	2075604	MSPC_Peak_77;ID=orf19.1770;Name=orf19.1770;Peak-2074774-2075106;Summit-2074909-2074910;Dist-0	inf	+
Ca21chr2_C_albicans_SC5314	2074717	2075604	MSPC_Peak_77;ID=orf19.1770;Name=orf19.1770;Peak-2074774-2075106;Summit-2074973-2074987;Dist-0	inf	+
Ca21chr2_C_albicans_SC5314	2096214	2097931	MSPC_Peak_74;ID=orf19.1760;Name=orf19.1760;Peak-2096718-2097593;Summit-2096735-2096753;Dist-0	inf	-
Ca21chr2_C_albicans_SC5314	2096214	2097931	MSPC_Peak_74;ID=orf19.1760;Name=orf19.1760;Peak-2096718-2097593;Summit-2097192-2097193;Dist-0	inf	-
Ca21chr2_C_albicans_SC5314	2096214	2097931	MSPC_Peak_74;ID=orf19.1760;Name=orf19.1760;Peak-2096718-2097593;Summit-2097402-2097403;Dist-0	inf	-
Ca21chr2_C_albicans_SC5314	2098137	2099855	MSPC_Peak_70;ID=orf19.1760;Name=orf19.1760;Peak-2096718-2097593;Summit-2098978-2098989;Dist--1386	inf	-
Ca21chr2_C_albicans_SC5314	2116684	2117579	MSPC_Peak_64;ID=orf19.1751;Name=orf19.1751;Peak-2117063-2119291;Summit-2117265-2117287;Dist-0	164.414	-
Ca21chr2_C_albicans_SC5314	2118024	2118962	MSPC_Peak_60;ID=orf19.1751;Name=orf19.1751;Peak-2117063-2119291;Summit-2118373-2118374;Dist-0	70.772	-
Ca21chr2_C_albicans_SC5314	2118024	2118962	MSPC_Peak_60;ID=orf19.1751;Name=orf19.1751;Peak-2117063-2119291;Summit-2118688-2118689;Dist-0	70.772	-
Ca21chr2_C_albicans_SC5314	2132194	2132742	MSPC_Peak_55;ID=orf19.1743;Name=orf19.1743;Peak-2132241-2134268;Summit-2132516-2132517;Dist-0	58	-
Ca21chr2_C_albicans_SC5314	2132955	2133312	MSPC_Peak_51;ID=orf19.1743;Name=orf19.1743;Peak-2132241-2134268;Summit-2133260-2133261;Dist-0	31	-
Ca21chr2_C_albicans_SC5314	2141969	2142245	MSPC_Peak_48;ID=orf19.1742;Name=orf19.1742;Peak-2137432-2138454;Summit-2142069-2142070;Dist--3616	88	-
Ca21chr2_C_albicans_SC5314	2147349	2147590	MSPC_Peak_44;ID=orf19.3490;Name=orf19.3490;Peak-2151608-2153146;Summit-2147525-2147526;Dist--4083	217	+
Ca21chr2_C_albicans_SC5314	2148119	2149519	MSPC_Peak_41;ID=orf19.3490;Name=orf19.3490;Peak-2151608-2153146;Summit-2148998-2149000;Dist--2609	inf	+
Ca21chr2_C_albicans_SC5314	2167538	2168040	MSPC_Peak_38;ID=tV(UAC)1;Name=tV(UAC)1;Peak-2167779-2167874;Summit-2167817-2167826;Dist-0	inf	-
Ca21chr2_C_albicans_SC5314	2168321	2168689	MSPC_Peak_34;ID=tF(GAA)4;Name=tF(GAA)4;Peak-2168512-2168599;Summit-2168535-2168545;Dist-0	inf	+
Ca21chr2_C_albicans_SC5314	2179467	2180450	MSPC_Peak_31;ID=orf19.5334;Name=orf19.5334;Peak-2179811-2180422;Summit-2179886-2179898;Dist-0	inf	-
Ca21chr2_C_albicans_SC5314	2180683	2181664	MSPC_Peak_29;ID=orf19.5335;Name=orf19.5335;Peak-2181357-2184926;Summit-2180987-2180988;Dist--370	inf	+
Ca21chr2_C_albicans_SC5314	2184658	2187867	MSPC_Peak_25;ID=orf19.5337;Name=orf19.5337;Peak-2185048-2185575;Summit-2185375-2185376;Dist-0	inf	+
Ca21chr2_C_albicans_SC5314	2184658	2187867	MSPC_Peak_25;ID=orf19.5338;Name=orf19.5338;Peak-2186699-2187484;Summit-2186501-2186502;Dist--198	inf	+
Ca21chr2_C_albicans_SC5314	2184658	2187867	MSPC_Peak_25;ID=orf19.5338;Name=orf19.5338;Peak-2186699-2187484;Summit-2186824-2186825;Dist-0	inf	+
Ca21chr2_C_albicans_SC5314	2189525	2191043	MSPC_Peak_22;ID=orf19.5341;Name=orf19.5341;Peak-2189961-2190749;Summit-2190492-2190498;Dist-0	inf	+
Ca21chr2_C_albicans_SC5314	2189525	2191043	MSPC_Peak_22;ID=orf19.5341;Name=orf19.5341;Peak-2189961-2190749;Summit-2190591-2190592;Dist-0	inf	+
Ca21chr2_C_albicans_SC5314	2201438	2202185	MSPC_Peak_19;ID=orf19.5350;Name=orf19.5350;Peak-2201965-2202837;Summit-2201970-2201971;Dist-0	96	-
Ca21chr2_C_albicans_SC5314	2216136	2216732	MSPC_Peak_14;ID=snR47;Name=snR47;Peak-2216247-2216337;Summit-2216296-2216297;Dist-0	inf	+
Ca21chr2_C_albicans_SC5314	2216136	2216732	MSPC_Peak_14;ID=orf19.5364;Name=orf19.5364;Peak-2216503-2217414;Summit-2216357-2216359;Dist--145	inf	+
Ca21chr2_C_albicans_SC5314	2229908	2230483	MSPC_Peak_4;ID=orf19.5369;Name=orf19.5369;Peak-2225932-2227017;Summit-2230111-2230112;Dist--3095	185	-
Ca21chr3_C_albicans_SC5314	13597	14067	MSPC_Peak_784;ID=orf19.5467;Name=orf19.5467;Peak-13756-14265;Summit-13709-13721;Dist--36	inf	+
Ca21chr3_C_albicans_SC5314	13597	14067	MSPC_Peak_784;ID=orf19.5467;Name=orf19.5467;Peak-13756-14265;Summit-13904-13905;Dist-0	inf	+
Ca21chr3_C_albicans_SC5314	15000	15551	MSPC_Peak_778;ID=orf19.5466;Name=orf19.5466;Peak-15901-16308;Summit-15426-15427;Dist--475	109	+
Ca21chr3_C_albicans_SC5314	15883	16333	MSPC_Peak_771;ID=orf19.5466;Name=orf19.5466;Peak-15901-16308;Summit-16205-16206;Dist-0	119	+
Ca21chr3_C_albicans_SC5314	22697	23113	MSPC_Peak_763;ID=orf19.5455;Name=orf19.5455;Peak-22745-23092;Summit-22912-22913;Dist-0	91	-
Ca21chr3_C_albicans_SC5314	44332	44679	MSPC_Peak_758;ID=orf19.5437;Name=orf19.5437;Peak-45115-45879;Summit-44526-44528;Dist--588	inf	+
Ca21chr3_C_albicans_SC5314	45219	46127	MSPC_Peak_752;ID=orf19.5437;Name=orf19.5437;Peak-45115-45879;Summit-45569-45570;Dist-0	91.663	+
Ca21chr3_C_albicans_SC5314	45219	46127	MSPC_Peak_752;ID=orf19.5437;Name=orf19.5437;Peak-45115-45879;Summit-45807-45808;Dist-0	91.663	+
Ca21chr3_C_albicans_SC5314	49389	50718	MSPC_Peak_744;ID=orf19.5431;Name=orf19.5431;Peak-51706-52413;Summit-50341-50350;Dist--1357	inf	+
Ca21chr3_C_albicans_SC5314	51513	52860	MSPC_Peak_738;ID=orf19.5431;Name=orf19.5431;Peak-51706-52413;Summit-52247-52248;Dist-0	159	+
Ca21chr3_C_albicans_SC5314	66027	66290	MSPC_Peak_723;ID=orf19.5418;Name=orf19.5418;Peak-66463-67896;Summit-66231-66232;Dist--232	37	+
Ca21chr3_C_albicans_SC5314	93369	93650	MSPC_Peak_717;ID=orf19.5399;Name=orf19.5399;Peak-95651-97186;Summit-93535-93536;Dist--2116	82	+
Ca21chr3_C_albicans_SC5314	125335	126086	MSPC_Peak_710;ID=orf19.5384;Name=orf19.5384;Peak-123507-126824;Summit-125690-125702;Dist-0	68.784	+
Ca21chr3_C_albicans_SC5314	128089	128369	MSPC_Peak_704;ID=orf19.5383;Name=orf19.5383;Peak-133120-135807;Summit-128210-128211;Dist--4910	78	+
Ca21chr3_C_albicans_SC5314	133127	133653	MSPC_Peak_696;ID=orf19.5383;Name=orf19.5383;Peak-133120-135807;Summit-133636-133637;Dist-0	25	+
Ca21chr3_C_albicans_SC5314	135551	136597	MSPC_Peak_689;ID=orf19.5383;Name=orf19.5383;Peak-133120-135807;Summit-135562-135563;Dist-0	97.636	+
Ca21chr3_C_albicans_SC5314	135551	136597	MSPC_Peak_689;ID=orf19.5381;Name=orf19.5381;Peak-137632-139983;Summit-136069-136070;Dist--1563	97.636	+
Ca21chr3_C_albicans_SC5314	144545	145498	MSPC_Peak_681;ID=orf19.5379;Name=orf19.5379;Peak-143572-144981;Summit-144768-144769;Dist-0	125.529	+
Ca21chr3_C_albicans_SC5314	144545	145498	MSPC_Peak_681;ID=orf19.5377;Name=orf19.5377;Peak-146266-147630;Summit-145096-145097;Dist--1170	125.529	+
Ca21chr3_C_albicans_SC5314	175693	175939	MSPC_Peak_674;ID=orf19.6165;Name=orf19.6165;Peak-175326-178316;Summit-175775-175776;Dist-0	36	+
Ca21chr3_C_albicans_SC5314	175979	176452	MSPC_Peak_665;ID=orf19.6165;Name=orf19.6165;Peak-175326-178316;Summit-176327-176328;Dist-0	25	+
Ca21chr3_C_albicans_SC5314	177925	178674	MSPC_Peak_659;ID=orf19.6165;Name=orf19.6165;Peak-175326-178316;Summit-178083-178084;Dist-0	52	+
Ca21chr3_C_albicans_SC5314	196078	196634	MSPC_Peak_653;ID=orf19.2499;Name=orf19.2499;Peak-193074-194198;Summit-196185-196186;Dist--1988	inf	-
Ca21chr3_C_albicans_SC5314	196078	196634	MSPC_Peak_653;ID=orf19.2499;Name=orf19.2499;Peak-193074-194198;Summit-196227-196228;Dist--2030	inf	-
Ca21chr3_C_albicans_SC5314	237404	237843	MSPC_Peak_647;ID=orf19.3153;Name=orf19.3153;Peak-236576-238732;Summit-237440-237441;Dist-0	23	+
Ca21chr3_C_albicans_SC5314	247199	247986	MSPC_Peak_641;ID=orf19.3159;Name=orf19.3159;Peak-250059-257564;Summit-247324-247325;Dist--2735	245.776	+
Ca21chr3_C_albicans_SC5314	247199	247986	MSPC_Peak_641;ID=orf19.3159;Name=orf19.3159;Peak-250059-257564;Summit-247797-247816;Dist--2244	245.776	+
Ca21chr3_C_albicans_SC5314	261766	262109	MSPC_Peak_634;ID=tR(CCU)1;Name=tR(CCU)1;Peak-261905-261993;Summit-261931-261943;Dist-0	inf	-
Ca21chr3_C_albicans_SC5314	266019	266335	MSPC_Peak_619;ID=orf19.1727;Name=orf19.1727;Peak-264975-268610;Summit-266042-266043;Dist-0	21	+
Ca21chr3_C_albicans_SC5314	293541	293862	MSPC_Peak_615;ID=orf19.1715;Name=orf19.1715;Peak-291579-293369;Summit-293686-293703;Dist--318	inf	-
Ca21chr3_C_albicans_SC5314	314343	314646	MSPC_Peak_607;ID=orf19.1702;Name=orf19.1702;Peak-315172-315812;Summit-314475-314476;Dist--697	80	+
Ca21chr3_C_albicans_SC5314	317173	318405	MSPC_Peak_602;ID=orf19.1700;Name=orf19.1700;Peak-317435-317995;Summit-317848-317849;Dist-0	inf	+
Ca21chr3_C_albicans_SC5314	317173	318405	MSPC_Peak_602;ID=orf19.1700;Name=orf19.1700;Peak-317435-317995;Summit-317931-317932;Dist-0	inf	+
Ca21chr3_C_albicans_SC5314	317173	318405	MSPC_Peak_602;ID=orf19.1700;Name=orf19.1700;Peak-317435-317995;Summit-317958-317959;Dist-0	inf	+
Ca21chr3_C_albicans_SC5314	335686	337057	MSPC_Peak_596;ID=orf19.1691;Name=orf19.1691;Peak-335872-336459;Summit-336269-336270;Dist-0	inf	+
Ca21chr3_C_albicans_SC5314	335686	337057	MSPC_Peak_596;ID=orf19.1691;Name=orf19.1691;Peak-335872-336459;Summit-336366-336367;Dist-0	inf	+
Ca21chr3_C_albicans_SC5314	338697	339495	MSPC_Peak_593;ID=orf19.1690;Name=orf19.1690;Peak-336918-338324;Summit-338909-338911;Dist--586	inf	-
Ca21chr3_C_albicans_SC5314	338697	339495	MSPC_Peak_593;ID=orf19.1690;Name=orf19.1690;Peak-336918-338324;Summit-338989-338990;Dist--666	inf	-
Ca21chr3_C_albicans_SC5314	339794	340367	MSPC_Peak_588;ID=orf19.1690;Name=orf19.1690;Peak-336918-338324;Summit-340029-340035;Dist--1706	inf	-
Ca21chr3_C_albicans_SC5314	361599	362476	MSPC_Peak_581;ID=orf19.1675;Name=orf19.1675;Peak-365359-366561;Summit-362267-362300;Dist--3060	inf	+
Ca21chr3_C_albicans_SC5314	407939	408267	MSPC_Peak_577;ID=tV(AAC)2;Name=tV(AAC)2;Peak-408049-408122;Summit-408068-408090;Dist-0	inf	-
Ca21chr3_C_albicans_SC5314	412042	412406	MSPC_Peak_572;ID=tK(UUU)1;Name=tK(UUU)1;Peak-412144-412218;Summit-412197-412204;Dist-0	inf	-
Ca21chr3_C_albicans_SC5314	417534	417765	MSPC_Peak_564;ID=orf19.1658;Name=orf19.1658;Peak-414753-416640;Summit-417627-417628;Dist--988	60	-
Ca21chr3_C_albicans_SC5314	423638	424031	MSPC_Peak_557;ID=tY(GUA)2;Name=tY(GUA)2;Peak-423773-423887;Summit-423793-423805;Dist-0	inf	-
Ca21chr3_C_albicans_SC5314	428361	429068	MSPC_Peak_549;ID=orf19.1653;Name=orf19.1653;Peak-428556-429146;Summit-428634-428635;Dist-0	305.149	-
Ca21chr3_C_albicans_SC5314	428361	429068	MSPC_Peak_549;ID=orf19.1653;Name=orf19.1653;Peak-428556-429146;Summit-428695-428696;Dist-0	305.149	-
Ca21chr3_C_albicans_SC5314	447485	447877	MSPC_Peak_543;ID=tE(UUC)2;Name=tE(UUC)2;Peak-447621-447714;Summit-447667-447679;Dist-0	inf	-
Ca21chr3_C_albicans_SC5314	457852	459224	MSPC_Peak_538;ID=orf19.1635;Name=orf19.1635;Peak-457876-458373;Summit-458308-458309;Dist-0	inf	+
Ca21chr3_C_albicans_SC5314	457852	459224	MSPC_Peak_538;ID=orf19.1634;Name=orf19.1634;Peak-459384-460584;Summit-458799-458800;Dist--585	inf	+
Ca21chr3_C_albicans_SC5314	457852	459224	MSPC_Peak_538;ID=orf19.1634;Name=orf19.1634;Peak-459384-460584;Summit-458846-458847;Dist--538	inf	+
Ca21chr3_C_albicans_SC5314	457852	459224	MSPC_Peak_538;ID=orf19.1634;Name=orf19.1634;Peak-459384-460584;Summit-458936-458937;Dist--448	inf	+
Ca21chr3_C_albicans_SC5314	464940	465952	MSPC_Peak_530;ID=orf19.1632;Name=orf19.1632;Peak-463276-464493;Summit-465107-465108;Dist--615	207.315	-
Ca21chr3_C_albicans_SC5314	464940	465952	MSPC_Peak_530;ID=orf19.1631;Name=orf19.1631;Peak-465114-466244;Summit-465141-465142;Dist-0	207.315	-
Ca21chr3_C_albicans_SC5314	492978	495794	MSPC_Peak_515;ID=orf19.1618;Name=orf19.1618;Peak-493471-495612;Summit-494201-494202;Dist-0	inf	-
Ca21chr3_C_albicans_SC5314	492978	495794	MSPC_Peak_515;ID=orf19.1618;Name=orf19.1618;Peak-493471-495612;Summit-494932-494933;Dist-0	inf	-
Ca21chr3_C_albicans_SC5314	492978	495794	MSPC_Peak_515;ID=orf19.1618;Name=orf19.1618;Peak-493471-495612;Summit-495323-495324;Dist-0	inf	-
Ca21chr3_C_albicans_SC5314	496546	497030	MSPC_Peak_509;ID=orf19.1617;Name=orf19.1617;Peak-497489-498661;Summit-496835-496857;Dist--633	inf	+
Ca21chr3_C_albicans_SC5314	517696	519901	MSPC_Peak_496;ID=orf19.1607;Name=orf19.1607;Peak-517727-520516;Summit-518628-518629;Dist-0	136.275	-
Ca21chr3_C_albicans_SC5314	517696	519901	MSPC_Peak_496;ID=orf19.1607;Name=orf19.1607;Peak-517727-520516;Summit-518718-518719;Dist-0	136.275	-
Ca21chr3_C_albicans_SC5314	517696	519901	MSPC_Peak_496;ID=orf19.1607;Name=orf19.1607;Peak-517727-520516;Summit-519184-519185;Dist-0	136.275	-
Ca21chr3_C_albicans_SC5314	538204	539563	MSPC_Peak_491;ID=orf19.234;Name=orf19.234;Peak-537221-538228;Summit-538458-538467;Dist--231	inf	-
Ca21chr3_C_albicans_SC5314	540097	540441	MSPC_Peak_482;ID=orf19.238;Name=orf19.238;Peak-539983-541083;Summit-540219-540220;Dist-0	108.591	-
Ca21chr3_C_albicans_SC5314	540097	540441	MSPC_Peak_482;ID=orf19.238;Name=orf19.238;Peak-539983-541083;Summit-540301-540302;Dist-0	108.591	-
Ca21chr3_C_albicans_SC5314	550974	551270	MSPC_Peak_478;ID=tM(CAU)1;Name=tM(CAU)1;Peak-551091-551162;Summit-551133-551142;Dist-0	inf	+
Ca21chr3_C_albicans_SC5314	566022	566526	MSPC_Peak_474;ID=orf19.251;Name=orf19.251;Peak-565238-565948;Summit-566274-566290;Dist--327	inf	-
Ca21chr3_C_albicans_SC5314	591896	592298	MSPC_Peak_470;ID=tF(GAA)1;Name=tF(GAA)1;Peak-592017-592104;Summit-592077-592078;Dist-0	inf	-
Ca21chr3_C_albicans_SC5314	681151	681520	MSPC_Peak_464;ID=tK(CUU)1;Name=tK(CUU)1;Peak-681268-681357;Summit-681319-681348;Dist-0	inf	-
Ca21chr3_C_albicans_SC5314	703022	703500	MSPC_Peak_459;ID=tE(UUC)1;Name=tE(UUC)1;Peak-703182-703275;Summit-703228-703254;Dist-0	inf	+
Ca21chr3_C_albicans_SC5314	722686	725932	MSPC_Peak_454;ID=orf19.339;Name=orf19.339;Peak-722952-724676;Summit-723089-723090;Dist-0	inf	-
Ca21chr3_C_albicans_SC5314	722686	725932	MSPC_Peak_454;ID=orf19.339;Name=orf19.339;Peak-722952-724676;Summit-723870-723871;Dist-0	inf	-
Ca21chr3_C_albicans_SC5314	796708	797014	MSPC_Peak_448;ID=orf19.6937;Name=orf19.6937;Peak-797828-799558;Summit-796772-796773;Dist--1056	73	+
Ca21chr3_C_albicans_SC5314	817624	818131	MSPC_Peak_443;ID=orf19.6924;Name=orf19.6924;Peak-818897-819295;Summit-817887-817888;Dist--1010	inf	+
Ca21chr3_C_albicans_SC5314	817624	818131	MSPC_Peak_443;ID=orf19.6924;Name=orf19.6924;Peak-818897-819295;Summit-817924-817925;Dist--973	inf	+
Ca21chr3_C_albicans_SC5314	818906	819447	MSPC_Peak_438;ID=orf19.6924;Name=orf19.6924;Peak-818897-819295;Summit-819276-819277;Dist-0	181	+
Ca21chr3_C_albicans_SC5314	835701	835992	MSPC_Peak_434;ID=tE(UUC)6;Name=tE(UUC)6;Peak-835796-835892;Summit-835835-835836;Dist-0	146	-
Ca21chr3_C_albicans_SC5314	844605	847384	MSPC_Peak_431;ID=orf19.2805;Name=orf19.2805;Peak-841185-843668;Summit-846272-846273;Dist--2605	inf	-
Ca21chr3_C_albicans_SC5314	844605	847384	MSPC_Peak_431;ID=orf19.2803;Name=orf19.2803;Peak-846304-847275;Summit-846341-846342;Dist-0	inf	-
Ca21chr3_C_albicans_SC5314	855804	856270	MSPC_Peak_423;ID=orf19.5854;Name=orf19.5854;Peak-856949-857797;Summit-856022-856040;Dist--910	inf	+
Ca21chr3_C_albicans_SC5314	856993	858170	MSPC_Peak_419;ID=orf19.5854.1;Name=orf19.5854.1;Peak-858792-859271;Summit-857972-857973;Dist--820	220.289	+
Ca21chr3_C_albicans_SC5314	856993	858170	MSPC_Peak_419;ID=orf19.5854.1;Name=orf19.5854.1;Peak-858792-859271;Summit-857994-857995;Dist--798	220.289	+
Ca21chr3_C_albicans_SC5314	864931	865412	MSPC_Peak_415;ID=orf19.5858;Name=orf19.5858;Peak-865142-865678;Summit-865270-865271;Dist-0	23	-
Ca21chr3_C_albicans_SC5314	865879	866649	MSPC_Peak_410;ID=snR17A;Name=snR17A;Peak-865974-866286;Summit-866255-866283;Dist-0	inf	+
Ca21chr3_C_albicans_SC5314	941006	942418	MSPC_Peak_407;ID=orf19.5905;Name=orf19.5905;Peak-942959-943261;Summit-941318-941319;Dist--1641	inf	+
Ca21chr3_C_albicans_SC5314	941006	942418	MSPC_Peak_407;ID=orf19.5904;Name=orf19.5904;Peak-941386-942394;Summit-941456-941457;Dist-0	inf	-
Ca21chr3_C_albicans_SC5314	941006	942418	MSPC_Peak_407;ID=orf19.5904;Name=orf19.5904;Peak-941386-942394;Summit-941479-941480;Dist-0	inf	-
Ca21chr3_C_albicans_SC5314	951226	951669	MSPC_Peak_403;ID=orf19.5908;Name=orf19.5908;Peak-949870-952101;Summit-951468-951469;Dist-0	37	-
Ca21chr3_C_albicans_SC5314	952730	953996	MSPC_Peak_398;ID=orf19.5908;Name=orf19.5908;Peak-949870-952101;Summit-953649-953664;Dist--1549	inf	-
Ca21chr3_C_albicans_SC5314	955936	957330	MSPC_Peak_393;ID=orf19.5908;Name=orf19.5908;Peak-949870-952101;Summit-956041-956042;Dist--3941	inf	-
Ca21chr3_C_albicans_SC5314	955936	957330	MSPC_Peak_393;ID=orf19.5908;Name=orf19.5908;Peak-949870-952101;Summit-956100-956101;Dist--4000	inf	-
Ca21chr3_C_albicans_SC5314	955936	957330	MSPC_Peak_393;ID=orf19.5908;Name=orf19.5908;Peak-949870-952101;Summit-956995-956996;Dist--4895	inf	-
Ca21chr3_C_albicans_SC5314	955936	957330	MSPC_Peak_393;ID=orf19.5908;Name=orf19.5908;Peak-949870-952101;Summit-957057-957058;Dist--4957	inf	-
Ca21chr3_C_albicans_SC5314	955936	957330	MSPC_Peak_393;ID=orf19.5908;Name=orf19.5908;Peak-949870-952101;Summit-957091-957092;Dist--4991	inf	-
Ca21chr3_C_albicans_SC5314	961082	961447	MSPC_Peak_387;ID=orf19.5911;Name=orf19.5911;Peak-960678-961925;Summit-961309-961310;Dist-0	56	-
Ca21chr3_C_albicans_SC5314	973858	975783	MSPC_Peak_381;ID=orf19.5917.3;Name=orf19.5917.3;Peak-973882-975468;Summit-974147-974148;Dist-0	214.89	+
Ca21chr3_C_albicans_SC5314	973858	975783	MSPC_Peak_381;ID=orf19.5917.3;Name=orf19.5917.3;Peak-973882-975468;Summit-975276-975277;Dist-0	214.89	+
Ca21chr3_C_albicans_SC5314	973858	975783	MSPC_Peak_381;ID=orf19.5917.3;Name=orf19.5917.3;Peak-973882-975468;Summit-975435-975436;Dist-0	214.89	+
Ca21chr3_C_albicans_SC5314	983904	984221	MSPC_Peak_375;ID=orf19.5924;Name=orf19.5924;Peak-985124-988516;Summit-983932-983933;Dist--1192	23	+
Ca21chr3_C_albicans_SC5314	991507	992670	MSPC_Peak_371;ID=orf19.5926;Name=orf19.5926;Peak-990406-991359;Summit-991775-991776;Dist--417	inf	-
Ca21chr3_C_albicans_SC5314	991507	992670	MSPC_Peak_371;ID=orf19.5926;Name=orf19.5926;Peak-990406-991359;Summit-991808-991809;Dist--450	inf	-
Ca21chr3_C_albicans_SC5314	991507	992670	MSPC_Peak_371;ID=orf19.5926;Name=orf19.5926;Peak-990406-991359;Summit-991842-991843;Dist--484	inf	-
Ca21chr3_C_albicans_SC5314	991507	992670	MSPC_Peak_371;ID=orf19.5927;Name=orf19.5927;Peak-991859-992662;Summit-992328-992329;Dist-0	inf	-
Ca21chr3_C_albicans_SC5314	993050	993641	MSPC_Peak_365;ID=orf19.5927;Name=orf19.5927;Peak-991859-992662;Summit-993469-993470;Dist--808	45	-
Ca21chr3_C_albicans_SC5314	1030627	1031717	MSPC_Peak_360;ID=orf19.5949;Name=orf19.5949;Peak-1030734-1036388;Summit-1031196-1031197;Dist-0	141.478	-
Ca21chr3_C_albicans_SC5314	1030627	1031717	MSPC_Peak_360;ID=orf19.5949;Name=orf19.5949;Peak-1030734-1036388;Summit-1031314-1031315;Dist-0	141.478	-
Ca21chr3_C_albicans_SC5314	1032462	1034920	MSPC_Peak_354;ID=orf19.5949;Name=orf19.5949;Peak-1030734-1036388;Summit-1032553-1032554;Dist-0	136.493	-
Ca21chr3_C_albicans_SC5314	1032462	1034920	MSPC_Peak_354;ID=orf19.5949;Name=orf19.5949;Peak-1030734-1036388;Summit-1034917-1034918;Dist-0	136.493	-
Ca21chr3_C_albicans_SC5314	1038893	1039296	MSPC_Peak_345;ID=tK(CUU)2;Name=tK(CUU)2;Peak-1039068-1039152;Summit-1039109-1039110;Dist-0	inf	-
Ca21chr3_C_albicans_SC5314	1040091	1040382	MSPC_Peak_339;ID=tK(CUU)2;Name=tK(CUU)2;Peak-1039068-1039152;Summit-1040222-1040223;Dist--1071	inf	-
Ca21chr3_C_albicans_SC5314	1040091	1040382	MSPC_Peak_339;ID=tK(CUU)2;Name=tK(CUU)2;Peak-1039068-1039152;Summit-1040256-1040257;Dist--1105	inf	-
Ca21chr3_C_albicans_SC5314	1041338	1041827	MSPC_Peak_334;ID=orf19.5953;Name=orf19.5953;Peak-1041439-1042776;Summit-1041592-1041593;Dist-0	115	+
Ca21chr3_C_albicans_SC5314	1050978	1051378	MSPC_Peak_329;ID=orf19.5958;Name=orf19.5958;Peak-1047995-1052494;Summit-1051079-1051080;Dist-0	112	+
Ca21chr3_C_albicans_SC5314	1055844	1057104	MSPC_Peak_321;ID=orf19.5963;Name=orf19.5963;Peak-1064248-1065297;Summit-1056106-1056107;Dist--8142	88.636	+
Ca21chr3_C_albicans_SC5314	1055844	1057104	MSPC_Peak_321;ID=orf19.5963;Name=orf19.5963;Peak-1064248-1065297;Summit-1056546-1056547;Dist--7702	88.636	+
Ca21chr3_C_albicans_SC5314	1055844	1057104	MSPC_Peak_321;ID=orf19.5960;Name=orf19.5960;Peak-1056760-1057272;Summit-1056790-1056791;Dist-0	88.636	-
Ca21chr3_C_albicans_SC5314	1058003	1059626	MSPC_Peak_317;ID=orf19.5960;Name=orf19.5960;Peak-1056760-1057272;Summit-1058247-1058248;Dist--976	inf	-
Ca21chr3_C_albicans_SC5314	1058003	1059626	MSPC_Peak_317;ID=orf19.5960;Name=orf19.5960;Peak-1056760-1057272;Summit-1058304-1058305;Dist--1033	inf	-
Ca21chr3_C_albicans_SC5314	1058003	1059626	MSPC_Peak_317;ID=orf19.5960;Name=orf19.5960;Peak-1056760-1057272;Summit-1059054-1059055;Dist--1783	inf	-
Ca21chr3_C_albicans_SC5314	1066303	1067120	MSPC_Peak_310;ID=orf19.5964;Name=orf19.5964;Peak-1066235-1066780;Summit-1066590-1066591;Dist-0	160.424	+
Ca21chr3_C_albicans_SC5314	1066303	1067120	MSPC_Peak_310;ID=orf19.5964;Name=orf19.5964;Peak-1066235-1066780;Summit-1066645-1066646;Dist-0	160.424	+
Ca21chr3_C_albicans_SC5314	1067948	1068940	MSPC_Peak_307;ID=orf19.5964.2;Name=orf19.5964.2;Peak-1067946-1068748;Summit-1068597-1068617;Dist-0	inf	+
Ca21chr3_C_albicans_SC5314	1096326	1097709	MSPC_Peak_302;ID=orf19.5982;Name=orf19.5982;Peak-1096663-1097682;Summit-1096664-1096665;Dist-0	174.069	-
Ca21chr3_C_albicans_SC5314	1096326	1097709	MSPC_Peak_302;ID=orf19.5982;Name=orf19.5982;Peak-1096663-1097682;Summit-1096838-1096839;Dist-0	174.069	-
Ca21chr3_C_albicans_SC5314	1096326	1097709	MSPC_Peak_302;ID=orf19.5982;Name=orf19.5982;Peak-1096663-1097682;Summit-1097288-1097289;Dist-0	174.069	-
Ca21chr3_C_albicans_SC5314	1108385	1109923	MSPC_Peak_297;ID=orf19.5991;Name=orf19.5991;Peak-1105065-1107791;Summit-1108552-1108572;Dist--762	inf	-
Ca21chr3_C_albicans_SC5314	1108385	1109923	MSPC_Peak_297;ID=orf19.5991;Name=orf19.5991;Peak-1105065-1107791;Summit-1109362-1109381;Dist--1572	inf	-
Ca21chr3_C_albicans_SC5314	1112371	1113559	MSPC_Peak_293;ID=orf19.5991;Name=orf19.5991;Peak-1105065-1107791;Summit-1113075-1113087;Dist--5285	inf	-
Ca21chr3_C_albicans_SC5314	1113790	1116831	MSPC_Peak_288;ID=orf19.5992;Name=orf19.5992;Peak-1118833-1120173;Summit-1116495-1116500;Dist--2334	inf	+
Ca21chr3_C_albicans_SC5314	1117087	1118282	MSPC_Peak_284;ID=orf19.5992;Name=orf19.5992;Peak-1118833-1120173;Summit-1117470-1117471;Dist--1363	inf	+
Ca21chr3_C_albicans_SC5314	1117087	1118282	MSPC_Peak_284;ID=orf19.5992;Name=orf19.5992;Peak-1118833-1120173;Summit-1117936-1117937;Dist--897	inf	+
Ca21chr3_C_albicans_SC5314	1117087	1118282	MSPC_Peak_284;ID=orf19.5992;Name=orf19.5992;Peak-1118833-1120173;Summit-1117971-1117972;Dist--862	inf	+
Ca21chr3_C_albicans_SC5314	1124380	1125578	MSPC_Peak_279;ID=orf19.5994;Name=orf19.5994;Peak-1126576-1127130;Summit-1124698-1124703;Dist--1874	inf	+
Ca21chr3_C_albicans_SC5314	1124380	1125578	MSPC_Peak_279;ID=orf19.5994;Name=orf19.5994;Peak-1126576-1127130;Summit-1124729-1124730;Dist--1847	inf	+
Ca21chr3_C_albicans_SC5314	1130261	1131548	MSPC_Peak_275;ID=orf19.5996.1;Name=orf19.5996.1;Peak-1130360-1131164;Summit-1130488-1130489;Dist-0	inf	+
Ca21chr3_C_albicans_SC5314	1130261	1131548	MSPC_Peak_275;ID=orf19.5996.1;Name=orf19.5996.1;Peak-1130360-1131164;Summit-1130550-1130551;Dist-0	inf	+
Ca21chr3_C_albicans_SC5314	1130261	1131548	MSPC_Peak_275;ID=orf19.5996.1;Name=orf19.5996.1;Peak-1130360-1131164;Summit-1130799-1130800;Dist-0	inf	+
Ca21chr3_C_albicans_SC5314	1144499	1145552	MSPC_Peak_272;ID=orf19.5999;Name=orf19.5999;Peak-1131394-1143879;Summit-1144752-1144760;Dist--874	inf	-
Ca21chr3_C_albicans_SC5314	1144499	1145552	MSPC_Peak_272;ID=orf19.5999;Name=orf19.5999;Peak-1131394-1143879;Summit-1144795-1144796;Dist--917	inf	-
Ca21chr3_C_albicans_SC5314	1146222	1148885	MSPC_Peak_262;ID=orf19.6000;Name=orf19.6000;Peak-1146153-1150658;Summit-1146710-1146711;Dist-0	286.645	+
Ca21chr3_C_albicans_SC5314	1146222	1148885	MSPC_Peak_262;ID=orf19.6000;Name=orf19.6000;Peak-1146153-1150658;Summit-1148361-1148362;Dist-0	286.645	+
Ca21chr3_C_albicans_SC5314	1146222	1148885	MSPC_Peak_262;ID=orf19.6000;Name=orf19.6000;Peak-1146153-1150658;Summit-1148795-1148796;Dist-0	286.645	+
Ca21chr3_C_albicans_SC5314	1149288	1150888	MSPC_Peak_259;ID=orf19.6000;Name=orf19.6000;Peak-1146153-1150658;Summit-1150016-1150017;Dist-0	inf	+
Ca21chr3_C_albicans_SC5314	1149288	1150888	MSPC_Peak_259;ID=orf19.6000;Name=orf19.6000;Peak-1146153-1150658;Summit-1150111-1150112;Dist-0	inf	+
Ca21chr3_C_albicans_SC5314	1153051	1154065	MSPC_Peak_255;ID=orf19.6002;Name=orf19.6002;Peak-1153254-1154042;Summit-1153281-1153282;Dist-0	inf	-
Ca21chr3_C_albicans_SC5314	1153051	1154065	MSPC_Peak_255;ID=orf19.6002;Name=orf19.6002;Peak-1153254-1154042;Summit-1153507-1153508;Dist-0	inf	-
Ca21chr3_C_albicans_SC5314	1191840	1192505	MSPC_Peak_250;ID=orf19.6973;Name=orf19.6973;Peak-1186970-1190746;Summit-1191965-1191966;Dist--1220	inf	-
Ca21chr3_C_albicans_SC5314	1191840	1192505	MSPC_Peak_250;ID=orf19.6973;Name=orf19.6973;Peak-1186970-1190746;Summit-1191993-1191994;Dist--1248	inf	-
Ca21chr3_C_albicans_SC5314	1191840	1192505	MSPC_Peak_250;ID=orf19.6973;Name=orf19.6973;Peak-1186970-1190746;Summit-1192168-1192169;Dist--1423	inf	-
Ca21chr3_C_albicans_SC5314	1193727	1194361	MSPC_Peak_246;ID=orf19.6975;Name=orf19.6975;Peak-1193135-1194311;Summit-1193729-1193730;Dist-0	224.852	-
Ca21chr3_C_albicans_SC5314	1193727	1194361	MSPC_Peak_246;ID=orf19.6975;Name=orf19.6975;Peak-1193135-1194311;Summit-1193955-1193956;Dist-0	224.852	-
Ca21chr3_C_albicans_SC5314	1193727	1194361	MSPC_Peak_246;ID=orf19.6975;Name=orf19.6975;Peak-1193135-1194311;Summit-1194081-1194082;Dist-0	224.852	-
Ca21chr3_C_albicans_SC5314	1202068	1203928	MSPC_Peak_240;ID=orf19.6979;Name=orf19.6979;Peak-1201851-1204193;Summit-1202838-1202839;Dist-0	149.199	+
Ca21chr3_C_albicans_SC5314	1202068	1203928	MSPC_Peak_240;ID=orf19.6979;Name=orf19.6979;Peak-1201851-1204193;Summit-1202891-1202892;Dist-0	149.199	+
Ca21chr3_C_albicans_SC5314	1202068	1203928	MSPC_Peak_240;ID=orf19.6979;Name=orf19.6979;Peak-1201851-1204193;Summit-1203881-1203882;Dist-0	149.199	+
Ca21chr3_C_albicans_SC5314	1215811	1216321	MSPC_Peak_235;ID=orf19.6982;Name=orf19.6982;Peak-1209814-1211103;Summit-1216054-1216069;Dist--4952	41.99	-
Ca21chr3_C_albicans_SC5314	1216658	1217026	MSPC_Peak_230;ID=orf19.6983;Name=orf19.6983;Peak-1216188-1217360;Summit-1216976-1216977;Dist-0	24	-
Ca21chr3_C_albicans_SC5314	1218766	1221073	MSPC_Peak_227;ID=orf19.6983;Name=orf19.6983;Peak-1216188-1217360;Summit-1218991-1219008;Dist--1632	inf	-
Ca21chr3_C_albicans_SC5314	1218766	1221073	MSPC_Peak_227;ID=orf19.6983;Name=orf19.6983;Peak-1216188-1217360;Summit-1220464-1220468;Dist--3105	inf	-
[truncated: 1,239 more rows]

## Sheet: 3
Ca21chr1_C_albicans_SC5314	4238	4672	MSPC_Peak_2207;ID=orf19.6114;Name=orf19.6114;Peak-4409-4720;Summit-4403-4417;Dist-0	166.409	-
[truncated: 3,327 more rows]

[truncated: 6 more sheets: 4, 5, 6, 7, 8, 9]
