# Supplementary material for: Ume6 protein complexes connect morphogenesis, adherence and hypoxic genes to shape Candida albicans biofilm architecture
Source: Nat Microbiol. 2025 Aug 21;10(9):2231–44. doi: 10.1038/s41564-025-02094-5 (PMC12408341; doi:10.1038/s41564-025-02094-5)
Supplement: Supplementary file 5 — Motif analysis results. [file 41564_2025_2094_MOESM5_ESM.xlsx]

## Sheet: Legend
	Description
Tab 1	Gene list for Ume6-bound genes associated with binding motif of each partner transcription factor

## Sheet: 1
	Binding motif analysis within Ume6 binding sites				Binding sites
Binding motif	Efg1	Upc2	Ndt80	Common (Efg1, Upc2, Ndt80)	Ume6
Number of genes	814	330	586	140	1206
	orf19.7567	ACS2	SEP7	ACT1	HGC1
	OYE23	ACT1	AAF1	AGA1	SEP7		A venn diagram showing the intersection of TF binding motif distributions.
	orf19.6586	ADAEC	AAP1	ALG6	AAF1
	orf19.3968	ADE13	ABC1	ASR3	AAP1
	POX18	ADH5	ACH1	AXL2	AAT1
	RPN3	AGA1	ACT1	BEM2	ABC1
	RFG1	ALG6	ADE2	BET2	ACB1
	ERG251	ALS3	ADH1	BMT1	ACC1
	orf19.775	AMS1	AGA1	BOI2	ACH1
	SCS7	ARO9	AGE1	CFL11	ACS2
	RAS1	ASE1	AGP2	CHS3	ACT1
	orf19.4320	ASR1	AHR1	CLA4	ADAEC
	orf19.5264	ASR3	ALG6	CLB2	ADE13
	MSN5	AXL2	ALS1	CLG1	ADE2
	ALS7	BEM2	ALS7	CSR1	ADH1
	orf19.5289	BET2	ARP8	CUP9	ADH5
	orf19.6736	BGL2	ASG7	EAP1	AGA1
	IHD1	BMT1	ASR3	EFG1	AGE1
	TCC1	BOI2	AXL2	FAB1	AGP2
	orf19.7152	CAN3	BCR1	FET31	AHP2
	orf19.90	CAS4	BEM2	FGR6-3	AHR1
	YHB5	CBP1	BET2	FLC1	AIP5
	IFE2	CCN1	BGL2	FLO9	ALG11
	orf19.7055	CDC12	BMH1	GDB1	ALG6
	orf19.2332	CDC43	BMT1	HHF22	ALK8
	ALS1	CFL11	BMT6	HSP70	ALO1
	orf19.3302	CFL4	BMT9	HWP2	ALS1
	CLN3	CHS3	BOI2	HYR1	ALS3
	SEF1	CHT2	BRG1	IHD2	ALS4
	MAL31	CLA4	BUD2	INT1	ALS7
	SCR1	CLB2	BUD20	IPL1	AMS1
	YHB1	CLG1	BUL1	IRO1	AOX2
	ALG6	CNB1	CAS4	ISA1	APE2
	orf19.5274	COX5	CAT2	ISU1	APN2
	orf19.1961	CPH1	CBR1	MAL2	ARC18
	tS(AGA)1	CSR1	CCN1	MNN12	ARD
	orf19.850	CTF5	CDC11	MP65	ARF2
	HIT1	CUP5	CDC19	MPT5	ARF3
	orf19.6968	CUP9	CDC5	MSB1	ARG1
	FRE10	CYP1	CDR4	OPT6	ARG83
	SEP7	EAP1	CFL11	orf19.1105.3	ARO9
	AAF1	ECM331	CFL2	orf19.1152	ARP5
	AAP1	EFG1	CFL4	orf19.1277	ARP8
	ABC1	ERG251	CFL5	orf19.1426	ASC1
	ACB1	ERG5	CHS3	orf19.1637	ASE1
	ACH1	ERG7	CLA4	orf19.1658	ASG1
	ACT1	EXG2	CLB2	orf19.1736	ASG7
	ADAEC	FAB1	CLG1	orf19.1793	ASR1
	ADE13	FAV1	CLN3	orf19.2025	ASR3
	ADE2	FCY21	CNT	orf19.204	ATO1
	ADH1	FET31	COX11	orf19.2210	ATO2
	ADH5	FGR15	CPD2	orf19.2308	ATO9
	AGA1	FGR51	CPP1	orf19.258	AUR1
	AGP2	FGR6-1	CRP1	orf19.2726	AVT1
	AHR1	FGR6-10	CRZ2	orf19.2892	AXL2
	AIP5	FGR6-3	CSE4	orf19.2905	BAT22
	ALG11	FLC1	CSR1	orf19.3134	BBC1
	ALO1	FLO8	CTR1	orf19.3215	BCR1
	ALS3	FLO9	CUP1	orf19.3264.1	BDF1
	ALS4	GAC1	CUP9	orf19.33	BEM2
	AMS1	GAP4	CYC1	orf19.3337	BET2
	APN2	GDB1	CZF1	orf19.3439	BFR1
	ARC18	GDH2	DCK1	orf19.3448	BGL2
	ARD	GDI1	DEF1	orf19.3487	BLP1
	ARF2	GLC3	DFI1	orf19.3501	BMH1
	ARF3	GLC7	DIM1	orf19.3679	BMT1
	ARG83	GPM1	DLD1	orf19.3868	BMT6
	ARP8	GPX2	DUR32	orf19.3968	BMT9
	ASC1	HEM13	EAP1	orf19.4167	BNI1
	ASG7	HFL2	ECE1	orf19.4349	BNI4
	ASR3	HGT3	ECM22	orf19.450	BOI2
	ATO2	HGT5	ECM33	orf19.4528.1	BRG1
	ATO9	HHF22	EFG1	orf19.4607	BUD14
	AXL2	HSP21	EHT1	orf19.4792	BUD2
	BCR1	HSP60	ENA21	orf19.4818	BUD20
	BEM2	HSP70	ENO1	orf19.4886	BUL1
	BET2	HWP1	ERG13	orf19.4952	CAN2
	BFR1	HWP2	ERG4	orf19.5069	CAN3
	BLP1	HXK1	ERG6	orf19.5264	CAS4
	BMT1	HYR1	ERO1	orf19.5431	CAT2
	BMT9	HYR3	FAB1	orf19.5614	CBP1
	BNI1	IHD2	FAD2	orf19.5717	CBR1
	BNI4	INT1	FAV1	orf19.5775	CCN1
	BOI2	IPL1	FAV2	orf19.5991	CDA2
	BUD14	IPP1	FCR1	orf19.6200	CDC11
	BUD2	IRO1	FEN1	orf19.6342	CDC12
	BUL1	ISA1	FET31	orf19.6608	CDC13
	CAN2	ISN1	FGR37	orf19.6705	CDC19
	CAN3	ISU1	FGR41	orf19.6715	CDC34
	CBP1	KIN2	FGR42	orf19.6736	CDC4
	CDC12	LYS1	FGR51	orf19.6864	CDC43
	CDC34	LYS9	FGR6-1	orf19.6869	CDC5
	CDC4	MAL2	FGR6-10	orf19.6968	CDR11
	CDC43	MKK2	FGR6-3	orf19.6984	CDR4
	CDR11	MNN12	FLC1	orf19.7152	CFL11
	CDR4	MNN47	FLO9	orf19.727	CFL2
	CFL11	MP65	FLU1	orf19.7304	CFL4
	CFL2	MPT5	FRE30	orf19.828	CFL5
	CFL5	MRR2	FRP3	orf19.872	CGA1
	CHS3	MSB1	GAL10	orf19.951	CHS3
	CHS8	MYO2	GAL102	PCL2	CHS4
	CHT2	NUO1	GAL7	PGA32	CHS6
	CHT3	OPT6	GAP1	PGA59	CHS8
	CLA4	OPY2	GAP6	PHM7	CHT2
	CLB2	orf19.1026.1	GCV2	POX18	CHT3
	CLG1	orf19.1105.3	GDB1	PPS1	CLA4
	CNB1	orf19.1152	GEF2	PTP3	CLB2
	CNT	orf19.1277	GIT3	RAC1	CLG1
	COX11	orf19.1303	GLX3	RAD53	CLN3
	COX7	orf19.1309	GLY1	RBT1	CMD1
	CPH1	orf19.1374	GNP1	RCT1	CMK1
	CPP1	orf19.1426	GNP2	REG1	CNB1
	CRP1	orf19.1440.1	GPR1	RPN3	CNT
	CRZ2	orf19.1584	GRF10	RSN1	COX11
	CSE4	orf19.1599	GRR1	SAP6	COX5
	CSH1	orf19.1637	GSC1	SAP7	COX7
	CSR1	orf19.1658	GYP2	SHE3	CPD2
	CTA4	orf19.1678	HAC1	SKY2	CPH1
	CTA8	orf19.1736	HAP41	SLP3	CPP1
	CTR1	orf19.1768	HGC1	SMD3	CRP1
	CTR2	orf19.1793	HGT12	SMM1	CRZ2
	CUP1	orf19.185	HGT16	snR5b	CSA1
	CUP9	orf19.1893	HGT2	SRD1	CSE4
	CYC1	orf19.1906	HGT6	SUN41	CSH1
	CYC3	orf19.193	HHF22	tD(GUC)7	CSR1
	CZF1	orf19.199	HHT2	tE(CUC)1	CTA4
	DAG7	orf19.2002	HIP1	TEC1	CTA8
	DCK1	orf19.2025	HIT1	TEN1	CTF5
	DEF1	orf19.204	HOL4	tG(GCC)3	CTR1
	DFI1	orf19.216	HOT1	tL(CAA)1	CTR2
	DOT5	orf19.2210	HSM3	TLO34	CUP1
	DPP3	orf19.2278	HSP70	TOS1	CUP5
	DRE2	orf19.2308	HTA2	tP(UGG)2	CUP9
	DYN1	orf19.2447	HWP1	tR(UCU)4	CYC1
	EAP1	orf19.2457	HWP2	TRM12	CYC3
	ECE1	orf19.2459	HYR1	tW(CCA)1	CYP1
	ECM21	orf19.2565	IAH1	UEC1	CZF1
	ECM22	orf19.258	IDH2	YHB1	DAG7
	ECM33	orf19.2725	IFA14	ZCF39	DCK1
	ECM331	orf19.2726	IFF9	ZDS1	DEF1
	EFG1	orf19.2766	IHD1		DFI1
	ELF1	orf19.2892	IHD2		DIM1
	EMC9	orf19.2905	INT1		DLD1
	ENA21	orf19.3076	IPK1		DNM1
	ERG11	orf19.3134	IPL1		DOT5
	ERG25	orf19.3215	IPT1		DPP3
	ERG3	orf19.3219	IRO1		DRE2
	ERG4	orf19.3264.1	ISA1		DUR32
	ERG6	orf19.33	IST2		DYN1
	ERG7	orf19.3337	ISU1		EAP1
	ERO1	orf19.3431	KAR9		ECE1
	ESA1	orf19.3439	KCH1		ECM21
	EXG2	orf19.3448	LIP8		ECM22
	FAB1	orf19.3487	LSC1		ECM33
	FAD2	orf19.3501	LSC2		ECM331
	FAD3	orf19.3679	LTE1		EFG1
	FCA1	orf19.3681	MAC1		EHT1
	FCR1	orf19.3697	MAE1		ELF1
	FCY21	orf19.3804	MAL2		EMC9
	FEN1	orf19.3854	MCA1		ENA21
	FET31	orf19.3868	MDG1		ENO1
	FGR15	orf19.3968	MDH1		ERG1
	FGR37	orf19.4057	MDM34		ERG11
	FGR41	orf19.4153	MDR1		ERG13
	FGR42	orf19.4167	MET28		ERG2
	FGR6-3	orf19.4263	MET6		ERG25
	FKH2	orf19.4347	MIT1		ERG251
	FLC1	orf19.4349	MLS1		ERG3
	FLO8	orf19.4412	MNN12		ERG4
	FLO9	orf19.4445	MNN14		ERG5
	FRE30	orf19.4472	MNN15		ERG6
	FRP3	orf19.450	MNN23		ERG7
	FUM12	orf19.4528.1	MNN24		ERO1
	GAC1	orf19.4607	MNN4		ESA1
	GAL10	orf19.4643	MNN47		EXG2
	GAL102	orf19.4699	MNT1		EXO70
	GAL7	orf19.4711	MP65		FAB1
	GAP1	orf19.4792	MPT5		FAD2
	GAP4	orf19.4818	MRR2		FAD3
	GAP6	orf19.4880	MRV4		FAV1
	GCN4	orf19.4886	MRV5		FAV2
	GCV2	orf19.4952	MSB1		FBA1
	GDB1	orf19.5019	MSH2		FCA1
	GDH2	orf19.5069	MSN4		FCR1
	GIR2	orf19.5137	MSN5		FCY21
	GIT3	orf19.5264	MSS4		FEN1
	GLC3	orf19.5308	MTG2		FET31
	GLC7	orf19.5339	MTM1		FGR15
	GLY1	orf19.5426	MYO2		FGR34
	GNP1	orf19.5431	NAG4		FGR37
	GNP2	orf19.557	NAM7		FGR41
	GPA2	orf19.5614	NCE102		FGR42
	GPM1	orf19.5619	NDE1		FGR51
	GPR1	orf19.5692	NGT1		FGR6-1
	GPX2	orf19.5717	NRG1		FGR6-10
	GRF10	orf19.577	OP4		FGR6-3
	GSC1	orf19.5775	OPI1		FKH2
	GSH2	orf19.5991	OPT2		FLC1
	GUT2	orf19.6119	OPT6		FLO8
	HAP41	orf19.6200	OPY1		FLO9
	HFL2	orf19.6342	orf19.1052		FLU1
	HGC1	orf19.6390	orf19.1105.3		FOX2
	HGT12	orf19.6491	orf19.1150		FOX3
	HGT16	orf19.6579	orf19.1150.1		FRE10
	HGT2	orf19.6580	orf19.1152		FRE30
	HGT5	orf19.6608	orf19.1189		FRP2
	HGT6	orf19.6636	orf19.1266		FRP3
	HHF22	orf19.6705	orf19.1267		FTR1
	HHT2	orf19.6707	orf19.1277		FUM12
	HMG1	orf19.6715	orf19.1286		GAC1
	HOF1	orf19.6736	orf19.1287		GAL10
	HOL4	orf19.6855	orf19.1334		GAL102
	HOT1	orf19.6864	orf19.1353		GAL7
	HPA2	orf19.6869	orf19.1409.1		GAP1
	HSE1	orf19.6968	orf19.1409.2		GAP4
	HSP21	orf19.6978	orf19.1417		GAP6
	HSP60	orf19.6979	orf19.1424		GCN4
	HSP70	orf19.6983	orf19.1426		GCV2
	HSP90	orf19.6984	orf19.1486		GDB1
	HTA2	orf19.7029	orf19.1506		GDH2
	HWP2	orf19.7152	orf19.1514		GDI1
	HXK1	orf19.716	orf19.1562		GEF2
	HYR1	orf19.719	orf19.1637		GFA1
	HYR3	orf19.7196	orf19.1658		GIG1
	IAH1	orf19.727	orf19.1676		GIR2
	IDH2	orf19.7304	orf19.1735		GIT3
	IFA14	orf19.7425	orf19.1736		GLC3
	IFD6	orf19.7506	orf19.1748		GLC7
	IFF11	orf19.7578	orf19.1778		GLX3
	IFF9	orf19.828	orf19.1793		GLY1
	IHD2	orf19.872	orf19.194		GNP1
	INO1	orf19.951	orf19.1958		GNP2
	INT1	PBS2	orf19.1961		GPA2
	IPK1	PCL2	orf19.1991		GPM1
	IPL1	PEX5	orf19.2025		GPM2
	IPT1	PFY1	orf19.204		GPR1
	IRO1	PGA18	orf19.2149		GPX2
	ISA1	PGA32	orf19.2150		GRF10
	ISN1	PGA59	orf19.2163		GRP2
	ISU1	PHM7	orf19.2175		GRR1
	KIC1	PLB3	orf19.2210		GSC1
	KIS2	PLB5	orf19.2308		GSH2
	LIP5	PMI1	orf19.2332		GUT2
	LIP8	POX18	orf19.2431		GYP2
	LSC1	PPS1	orf19.2498		HAC1
	LSC2	PSP1	orf19.2505		HAP41
	LSP1	PST1	orf19.2515		HEM13
	LTE1	PTH1	orf19.2516		HEX3
	LYS143	PTP3	orf19.258		HFL2
	LYS144	RAC1	orf19.2670		HGT12
	LYS9	RAD53	orf19.2725		HGT16
	MAC1	RBT1	orf19.2726		HGT2
	MAL2	RCT1	orf19.2757		HGT3
	MCA1	RDH54	orf19.2800		HGT4
	MCM1	REG1	orf19.2822		HGT5
	MDG1	RFX2	orf19.2892		HGT6
	MDH1	RGD1	orf19.2905		HGT7
	MDH1-1	RHO1	orf19.302		HHF1
	MDH1-3	RHR2	orf19.3051		HHF22
	MDM34	RNH35	orf19.3053		HHT2
	MEP1	RPC31	orf19.3087.1		HHT21
	MET28	RPN3	orf19.3091		HIP1
	MET6	RSN1	orf19.3134		HIT1
	MIT1	SAP5	orf19.3158		HMG1
	MNN12	SAP6	orf19.321		HMX1
	MNN14	SAP7	orf19.3210		HNM1
	MNN15	SCP1	orf19.3215		HOF1
	MNN24	SEC22	orf19.3232		HOL4
	MNN4	SHE3	orf19.3264.1		HOT1
	MNN42	SIR2	orf19.33		HPA2
	MNT1	SKY2	orf19.3301		HSE1
	MOH1	SLP3	orf19.3302		HSM3
	MP65	SMC1	orf19.3325		HSP21
	MPT5	SMD3	orf19.3337		HSP60
	MRF1	SMM1	orf19.3360		HSP70
	MRP8	snR33a	orf19.3364		HSP90
	MSB1	snR3a	orf19.3420		HTA1
	MSN4	snR42a	orf19.3430		HTA2
	MSS4	snR44d	orf19.3431		HTB1
	MYO1	snR5b	orf19.3439		HWP1
	NAM7	snR8a	orf19.344		HWP2
	NBP2	SOK1	orf19.3448		HXK1
	NCE102	SPT23	orf19.3487		HXK2
	NCE103	SRD1	orf19.3499		HYR1
	NGT1	SSC1	orf19.3501		HYR3
	NHP6A	SSR1	orf19.3671		IAH1
	NRG1	STR2	orf19.3679		IDH1
	NTF2	SUN41	orf19.3713		IDH2
	NUO1	SUR2	orf19.3748		IDI1
	OPI1	SWE1	orf19.3751		IFA14
	OPT2	tA(AGC)3	orf19.3828		IFD6
	OPT6	tC(GCA)1	orf19.3868		IFE2
	OPY1	tD(GUC)5	orf19.3869		IFF11
	OPY2	tD(GUC)7	orf19.3945		IFF4
	orf19.1052	tE(CUC)1	orf19.3968		IFF9
	orf19.1105.3	TEC1	orf19.3970		IFG3
	orf19.1152	TEN1	orf19.3984		IHD1
	orf19.1189	tG(GCC)3	orf19.4167		IHD2
	orf19.1277	tG(UCC)1	orf19.4273		INO1
	orf19.1286	tI(AAU)4	orf19.4320		INT1
	orf19.1287	TIM17	orf19.4349		IPK1
	orf19.1309	tK(UUU)1	orf19.4372		IPL1
	orf19.1334	tK(UUU)3	orf19.4423		IPP1
	orf19.1353	tL(AAG)2	orf19.4450.1		IPT1
	orf19.1374	tL(CAA)1	orf19.446		IQG1
	orf19.1393	tL(UAA)1	orf19.450		IRO1
	orf19.1394	TLO1	orf19.4528.1		ISA1
	orf19.1403	TLO34	orf19.4607		ISN1
	orf19.1409.1	TNA1	orf19.4654		IST2
	orf19.1409.2	TOS1	orf19.4657		ISU1
	orf19.1417	tP(UGG)2	orf19.4666		KAR9
	orf19.1424	tP(UGG)3	orf19.4779		KCH1
	orf19.1426	TPM2	orf19.4780		KEL1
	orf19.1440.1	tR(UCU)4	orf19.4783		KEX1
	orf19.1460	TRM12	orf19.4792		KGD1
	orf19.1461	tS(UGA)1	orf19.4818		KIC1
	orf19.1486	tT(AGU)6	orf19.4875		KIN2
	orf19.1488	TUB1	orf19.4886		KIS2
	orf19.1584	TUS1	orf19.4906		KRE1
	orf19.1637	tW(CCA)1	orf19.4936		LEU1
	orf19.1658	UEC1	orf19.4952		LIG1
	orf19.1720	VMA6	orf19.5006.1		LIG4
	orf19.1735	VPH2	orf19.5019		LIP5
	orf19.1736	XYL2	orf19.5026		LIP8
	orf19.1748	YHB1	orf19.5069		LSC1
	orf19.1778	YKT6	orf19.5114.1		LSC2
	orf19.1793	ZCF27	orf19.5131		LSP1
	orf19.1821	ZCF39	orf19.5139		LTE1
	orf19.1860.1	ZCF8	orf19.5264		LYS1
	orf19.1893	ZDS1	orf19.5288.1		LYS143
	orf19.1906		orf19.5289		LYS144
	orf19.1958		orf19.5308		LYS9
	orf19.1964		orf19.5431		MAC1
	orf19.2025		orf19.5438		MAE1
	orf19.204		orf19.5539		MAK21
	orf19.2048		orf19.5614		MAL2
	orf19.2061		orf19.5692		MAL31
	orf19.2124		orf19.5717		MCA1
	orf19.2125		orf19.5728		MCM1
	orf19.2149		orf19.577		MCT1
	orf19.215		orf19.5775		MDG1
	orf19.2150		orf19.578		MDH1
	orf19.216		orf19.5861.1		MDH1-1
	orf19.2175		orf19.5866		MDH1-3
	orf19.2210		orf19.5917.3		MDM34
	orf19.2244		orf19.5991		MDR1
	orf19.2308		orf19.6003		MEP1
	orf19.2415		orf19.6027		MET28
	orf19.2431		orf19.6160		MET6
	orf19.2447		orf19.6181		MIH1
	orf19.2457		orf19.6200		MIT1
	orf19.2459		orf19.6211		MKK2
	orf19.2478.1		orf19.6342		MLS1
	orf19.2498		orf19.6526		MNN12
	orf19.2515		orf19.6527		MNN14
	orf19.2516		orf19.6547		MNN15
	orf19.2529.1		orf19.6555		MNN23
	orf19.2565		orf19.6579		MNN24
	orf19.2574		orf19.6608		MNN4
	orf19.258		orf19.6658		MNN42
	orf19.2653		orf19.670.2		MNN47
	orf19.2704		orf19.6705		MNT1
	orf19.2726		orf19.6707		MOH1
	orf19.2749		orf19.6715		MP65
	orf19.2778		orf19.6736		MPT5
	orf19.2822		orf19.6769		MRF1
	orf19.2892		orf19.6770		MRP8
	orf19.2905		orf19.6809		MRR1
	orf19.3053		orf19.6852		MRR2
	orf19.3076		orf19.6852.1		MRV4
	orf19.3089		orf19.6855		MRV5
	orf19.3134		orf19.6864		MSB1
	orf19.3158		orf19.6869		MSH2
	orf19.321		orf19.6887		MSN4
	orf19.3210		orf19.6888		MSN5
	orf19.3215		orf19.6897		MSS4
	orf19.3264.1		orf19.6911		MTG2
	orf19.3277		orf19.6912		MTM1
	orf19.33		orf19.693		MVD
	orf19.3301		orf19.6949		MYO1
	orf19.3332		orf19.6968		MYO2
	orf19.3337		orf19.6979		NAG4
	orf19.3360		orf19.6983		NAM7
	orf19.3364		orf19.6984		NBP2
	orf19.338		orf19.699		NCE102
	orf19.3406		orf19.7042		NCE103
	orf19.3439		orf19.7043		NCR1
	orf19.3448		orf19.7054		NDE1
	orf19.3460		orf19.7055		NGT1
	orf19.3469		orf19.7077		NHP6A
	orf19.3487		orf19.7078		NRG1
	orf19.3501		orf19.7085		NRP1
	orf19.3637		orf19.7152		NSG2
	orf19.3671		orf19.727		NTF2
	orf19.3679		orf19.7304		NUO1
	orf19.3694		orf19.7337		OP4
	orf19.3713		orf19.7368		OPI1
	orf19.3719		orf19.7380		OPT2
	orf19.3742		orf19.741		OPT6
	orf19.3793		orf19.7445		OPY1
	orf19.3804		orf19.7464		OPY2
	orf19.3854		orf19.7480		orf19.1026
	orf19.3868		orf19.7502		orf19.1026.1
	orf19.3869		orf19.7567		orf19.1052
	orf19.3928		orf19.7590		orf19.1060
	orf19.3929		orf19.787		orf19.1105.3
	orf19.3984		orf19.787.1		orf19.1150
	orf19.399		orf19.828		orf19.1150.1
	orf19.4031		orf19.850		orf19.1152
	orf19.409		orf19.871		orf19.1186
	orf19.4153		orf19.872		orf19.1189
	orf19.4167		orf19.938		orf19.1257
	orf19.4184		orf19.951		orf19.1266
	orf19.4196		orf19.972		orf19.1267
	orf19.4214		ORM1		orf19.1277
	orf19.4229		PCL2		orf19.1286
	orf19.4280		PDC11		orf19.1287
	orf19.4347		PDR16		orf19.1302
	orf19.4349		PET9		orf19.1303
	orf19.4357		PFY1		orf19.1308
	orf19.4358		PGA14		orf19.1309
	orf19.4372		PGA32		orf19.1334
	orf19.4376		PGA34		orf19.1353
	orf19.4423		PGA38		orf19.1374
	orf19.4439		PGA45		orf19.1391
	orf19.4439.1		PGA53		orf19.1393
	orf19.4445		PGA54		orf19.1394
	orf19.4446		PGA56		orf19.1403
	orf19.4450.1		PGA59		orf19.1409.1
	orf19.4459		PGA6		orf19.1409.2
	orf19.446		PGA7		orf19.1417
	orf19.4471		PGM2		orf19.1424
	orf19.4472		PHA2		orf19.1426
	orf19.4478		PHM5		orf19.1440.1
	orf19.450		PHM7		orf19.1460
	orf19.4528.1		PHR2		orf19.1461
	orf19.4601		PIL1		orf19.1486
	orf19.4607		PLB3		orf19.1488
	orf19.4654		PMA1		orf19.1506
	orf19.4657		PMC1		orf19.1514
	orf19.4666		PMM1		orf19.1562
	orf19.4699		POX18		orf19.1584
	orf19.4711		PPS1		orf19.1599
	orf19.4715		PRN1		orf19.1610
	orf19.4779		PSD1		orf19.1611
	orf19.4780		PTH2		orf19.1617
	orf19.4783		PTP1		orf19.1637
	orf19.4792		PTP3		orf19.1654
	orf19.4795		PTR22		orf19.1658
	orf19.4796		PUT1		orf19.1676
	orf19.4818		RAC1		orf19.1678
	orf19.4880		RAD53		orf19.1679
	orf19.4883		RAS1		orf19.1720
	orf19.4886		RBT1		orf19.1735
	orf19.4912		RBT4		orf19.1736
	orf19.4936		RCT1		orf19.1748
	orf19.4942		RDI1		orf19.1768
	orf19.4949		RDN5		orf19.1778
	orf19.4952		REG1		orf19.1785
	orf19.5026		RFG1		orf19.1793
	orf19.5069		RGA2		orf19.1821
	orf19.5131		RGS2		orf19.185
	orf19.5139		RGT1		orf19.1860.1
	orf19.5238		RHA1		orf19.1893
	orf19.5282		RHB1		orf19.1906
	orf19.5288.1		RHD1		orf19.192
	orf19.5322		RHO1		orf19.193
	orf19.5431		RHO2		orf19.194
	orf19.5517		RHR2		orf19.1946
	orf19.5539		RME1		orf19.1958
	orf19.556		RMT2		orf19.1961
	orf19.557		RNH35		orf19.1964
	orf19.5614		RNR21		orf19.199
	orf19.5618		ROA1		orf19.1991
	orf19.5619		ROB1		orf19.2002
	orf19.5626		RPL11		orf19.2025
	orf19.5717		RPM2		orf19.204
	orf19.5722		RPN3		orf19.2045
	orf19.5728		RPS1		orf19.2047
	orf19.5775		RPS12		orf19.2048
	orf19.5799		RPS19A		orf19.2049
	orf19.5861.1		RSN1		orf19.2050
	orf19.5910		RTA4		orf19.2061
	orf19.5917.3		RTF1		orf19.2078
	orf19.5991		SAC7		orf19.2124
	orf19.6027		SAM2		orf19.2125
	orf19.6160		SAP6		orf19.2149
	orf19.6200		SAP7		orf19.215
	orf19.6280		SAP9		orf19.2150
	orf19.6286		SBP1		orf19.216
	orf19.6342		SCR1		orf19.2163
	orf19.6348		SCS7		orf19.2175
	orf19.6414		SEC14		orf19.2210
	orf19.6423		SEF1		orf19.2244
	orf19.6435		SEF2		orf19.2278
	orf19.6456		SFC1		orf19.2308
	orf19.6458.1		SFL1		orf19.2332
	orf19.6501		SGS1		orf19.2333
	orf19.6526		SHE3		orf19.2415
	orf19.6527		SIR2		orf19.2426
	orf19.6530		SKN7		orf19.2431
	orf19.6547		SKY2		orf19.2447
	orf19.6555		SLM2		orf19.2457
	orf19.6569		SLN1		orf19.2459
	orf19.660		SLP3		orf19.2478.1
	orf19.6602		SMD3		orf19.2498
	orf19.6604		SMF12		orf19.2505
	orf19.6608		SMI1		orf19.2515
	orf19.6635		SMM1		orf19.2516
	orf19.6636		SMP3		orf19.2529.1
	orf19.6658		SNM1		orf19.2565
	orf19.670.2		SNO1		orf19.257
	orf19.6705		snR189d		orf19.2574
	orf19.6715		snR35c		orf19.2575
	orf19.6816		snR44d		orf19.258
	orf19.6843		snR5b		orf19.2638
	orf19.6852		SNRNAU2		orf19.264
	orf19.6852.1		SNZ1		orf19.2650
	orf19.6864		SPE2		orf19.2653
	orf19.6869		SRB1		orf19.2657
	orf19.6887		SRD1		orf19.2670
	orf19.6888		STE50		orf19.2701
	orf19.6897		SUN41		orf19.2704
	orf19.69		SUR7		orf19.2710
	orf19.69.2		SUT1		orf19.2725
	orf19.6905		TCC1		orf19.2726
	orf19.6911		tD(GUC)4		orf19.2742
	orf19.6912		tD(GUC)7		orf19.2743
	orf19.692		tE(CUC)1		orf19.2749
	orf19.693		tE(UUC)1		orf19.2757
	orf19.6984		tE(UUC)6		orf19.2766
	orf19.7022		TEC1		orf19.2778
	orf19.7024		TEF1		orf19.2800
	orf19.7054		TEM1		orf19.2822
	orf19.7077		TEN1		orf19.2829
	orf19.7078		tF(GAA)2		orf19.2892
	orf19.7085		tF(GAA)3		orf19.2905
	orf19.7095		tG(CCC)1		orf19.302
	orf19.7096		tG(GCC)3		orf19.3051
	orf19.7166		tH(GUG)3		orf19.3053
	orf19.7196		TIM22		orf19.3076
	orf19.7250		tK(CUU)2		orf19.3087.1
	orf19.727		tL(CAA)1		orf19.3089
	orf19.7279.1		tL(UAA)3		orf19.3091
	orf19.7304		tL(UAA)4		orf19.3134
	orf19.732		TLO34		orf19.3158
	orf19.733		tM(CAU)1		orf19.321
	orf19.7336		TOS1		orf19.3210
	orf19.7347		tP(AGG)1		orf19.3215
	orf19.7348		tP(UGG)2		orf19.3219
	orf19.7368		tP(UGG)4		orf19.3232
	orf19.7380		TPD3		orf19.3245
	orf19.741		TPI1		orf19.3264.1
	orf19.7425		TPO3		orf19.3277
	orf19.7455		TPO4		orf19.33
	orf19.7480		tQ(UUG)5		orf19.3301
	orf19.7502		tR(UCU)4		orf19.3302
	orf19.7642		TRM12		orf19.3325
	orf19.828		tS(AGA)2		orf19.3332
	orf19.867		tS(AGA)4		orf19.3337
	orf19.871		tS(UGA)2		orf19.334
	orf19.872		tT(AGU)3		orf19.3360
	orf19.93		tT(AGU)4		orf19.3364
	orf19.938		tT(UGU)1		orf19.3375
	orf19.948		tV(CAC)1		orf19.338
	orf19.949		tV(UAC)1		orf19.3406
	orf19.951		tW(CCA)1		orf19.341
	orf19.972		tY(GUA)3		orf19.3420
	ORM1		UAP1		orf19.3427
	OSM1		UBI3		orf19.3430
	OSM2		UBP13		orf19.3431
	PAN3		UEC1		orf19.3439
	PCL2		UTP20		orf19.344
	PDA1		VPH1		orf19.3448
	PDR16		VPS21		orf19.3453
	PDS5		WOR2		orf19.3460
	PEA2		WOR3		orf19.3461
	PEX19		XUT1		orf19.3469
	PGA13		YHB1		orf19.3483
	PGA14		YHB5		orf19.3487
	PGA16		ZCF20		orf19.3499
	PGA18		ZCF3		orf19.35.1
	PGA23		ZCF31		orf19.3501
	PGA32		ZCF39		orf19.3637
	PGA34		ZDS1		orf19.3658
	PGA45		ZSF1		orf19.3659
	PGA46				orf19.3661
	PGA54				orf19.3671
	PGA56				orf19.3679
	PGA59				orf19.3681
	PGA6				orf19.3689
	PGI1				orf19.3694
	PGM2				orf19.3697
	PHM5				orf19.3698
	PHM7				orf19.3713
	PHO8				orf19.3719
	PHR2				orf19.3742
	PIL1				orf19.3748
	PLB5				orf19.3751
	PMC1				orf19.3793
	POX1				orf19.3804
	PPS1				orf19.3828
	PRE4				orf19.3854
	PRN1				orf19.3868
	PSD1				orf19.3869
	PSP1				orf19.3898
	PST1				orf19.3928
	PST3				orf19.3929
	PTH1				orf19.3945
	PTH2				orf19.3968
	PTP1				orf19.3970
	PTP3				orf19.3984
	QCR6				orf19.399
	QDR1				orf19.3991
	RAC1				orf19.3992
	RAD53				orf19.4031
	RAS2				orf19.4057
	RBT1				orf19.409
	RBT4				orf19.4153
	RCH1				orf19.4167
	RCT1				orf19.4184
	RDH54				orf19.4196
	RDI1				orf19.4214
	RDN5				orf19.4229
	REG1				orf19.4263
	RGS2				orf19.4273
	RGT1				orf19.4280
	RHA1				orf19.4320
	RHB1				orf19.4347
	RHD1				orf19.4349
	RIM101				orf19.4357
	RIM8				orf19.4358
	RKI1				orf19.4368
	RME1				orf19.4372
	RMT2				orf19.4376
	RNR21				orf19.4412
	ROB1				orf19.4423
	RPL11				orf19.4439
	RPM2				orf19.4439.1
	RPP2A				orf19.4445
	RPR1				orf19.4446
	RPS1				orf19.4450.1
	RPS12				orf19.4459
	RPS19A				orf19.446
	RPS23A				orf19.4471
	RPS27A				orf19.4472
	RPS42				orf19.4478
	RPS7A				orf19.450
	RSN1				orf19.4503
	RSR1				orf19.4528.1
	RTA4				orf19.4537
	SAC7				orf19.4538
	SAM2				orf19.4601
	SAP5				orf19.4607
	SAP6				orf19.4643
	SAP7				orf19.4654
	SAP9				orf19.4657
	SBP1				orf19.4666
	SCP1				orf19.4699
	SEC14				orf19.4711
	SEC18				orf19.4715
	SEC4				orf19.4779
	SEC62				orf19.4780
	SEF2				orf19.4783
	SFC1				orf19.4792
	SFL1				orf19.4795
	SGS1				orf19.4796
	SHA3				orf19.480
	SHE3				orf19.4818
	SKN7				orf19.4824
	SKO1				orf19.4825
	SKY2				orf19.4847
	SLM2				orf19.4849
	SLN1				orf19.4857
	SLP3				orf19.4875
	SLR1				orf19.4880
	SMC6				orf19.4883
	SMD3				orf19.4886
	SMF12				orf19.4898
	SMI1				orf19.4903
	SMM1				orf19.4906
	SNM1				orf19.4907
	snR189d				orf19.4908
	snR35c				orf19.4912
	snR5b				orf19.4936
	SNR6				orf19.4942
	snR60				orf19.4949
	snR8a				orf19.4952
	SOD5				orf19.5006.1
	SOD6				orf19.5019
	SOK1				orf19.5026
	SPT23				orf19.5069
	SRD1				orf19.5114.1
	SSA2				orf19.5131
	SSN6				orf19.5137
	SSU1				orf19.5139
	SSY5				orf19.5177
	STE50				orf19.5205
	STF2				orf19.5238
	STP2				orf19.5264
	STR2				orf19.5274
	SUC1				orf19.5282
	SUL2				orf19.5288.1
	SUN41				orf19.5289
	SUR2				orf19.5293
	SUT1				orf19.5308
	SWE1				orf19.5322
	tA(AGC)3				orf19.5339
	tA(AGC)4				orf19.5406
	tA(AGC)7				orf19.5426
	tC(GCA)1				orf19.5431
	tC(GCA)2				orf19.5438
	tD(GUC)4				orf19.5517
	tD(GUC)5				orf19.5539
	tD(GUC)6				orf19.5555
	tD(GUC)7				orf19.556
	TDH3				orf19.557
	tE(CUC)1				orf19.5576
	tE(UUC)1				orf19.5578
	tE(UUC)6				orf19.5614
	TEC1				orf19.5618
	TEF4				orf19.5619
	TEM1				orf19.5620
	TEN1				orf19.5626
	tG(GCC)3				orf19.5692
	tG(GCC)5				orf19.5717
	tH(GUG)3				orf19.5722
	THR4				orf19.5728
	tI(AAU)2				orf19.577
	tI(AAU)5				orf19.5772
	tI(UAU)1				orf19.5773
	TIM22				orf19.5775
	tK(CUU)1				orf19.5777
	tK(CUU)2				orf19.578
	tK(UUU)2				orf19.5799
	tK(UUU)3				orf19.5841
	tL(CAA)1				orf19.5842
	tL(CAA)2				orf19.5861.1
	tL(CAA)3				orf19.5866
	tL(CAA)5				orf19.5874
	tL(UAA)4				orf19.5876
	TLO1				orf19.5885
	TLO34				orf19.5910
	TLO5				orf19.5917.3
	tM(CAU)2				orf19.5963
	tM(CAU)4				orf19.5965
	tN(GUU)4				orf19.5966
	TOS1				orf19.5991
	tP(AGG)1				orf19.6003
	tP(UGG)2				orf19.6025
	tP(UGG)4				orf19.6027
	TPM2				orf19.606
	TPO3				orf19.607
	TPO4				orf19.6114
	tQ(CUG)1				orf19.6118
	tQ(UUG)1				orf19.6119
	tQ(UUG)3				orf19.6160
	tQ(UUG)5				orf19.6181
	tR(ACG)2				orf19.6192
	tR(CCG)1				orf19.6200
	tR(UCU)4				orf19.6211
	tR(UCU)5				orf19.6219
	TRM12				orf19.6259
	TRR1				orf19.6275
	tS(AGA)2				orf19.6280
	tS(AGA)4				orf19.6286
	tS(CAG)1				orf19.6325.1
	tS(CGA)1				orf19.6326
	tS(UGA)1				orf19.6342
	tS(UGA)2				orf19.6348
	tS(UGA)3				orf19.6353
	tT(UGU)1				orf19.6354
	TUS1				orf19.6390
	tV(AAC)1				orf19.6391
	tV(AAC)2				orf19.6414
	tV(AAC)3				orf19.6423
	tV(AAC)4				orf19.6435
	tV(AAC)5				orf19.6456
	tV(UAC)1				orf19.6458.1
	tW(CCA)1				orf19.6491
	tW(CCA)2				orf19.6492
	TYE7				orf19.6501
	UBP13				orf19.6526
	UEC1				orf19.6527
	UGA33				orf19.6528
	UGA4				orf19.6530
	UTP20				orf19.6547
	UTP22				orf19.6555
	VID21				orf19.6556
	VPH1				orf19.6569
	VPH2				orf19.6579
	VPS21				orf19.6580
	VTI1				orf19.6585
	WAR1				orf19.6586
	WOR2				orf19.660
	WOR3				orf19.6602
	YCK2				orf19.6604
	YCP4				orf19.6608
	YKT6				orf19.6635
	YMX6				orf19.6636
	YOR1				orf19.6644
	YPT7				orf19.6658
	YPT72				orf19.670.2
	YTH1				orf19.6705
	ZCF20				orf19.6707
	ZCF25				orf19.6715
	ZCF27				orf19.6736
	ZCF3				orf19.675
	ZCF31				orf19.675.1
	ZCF39				orf19.6769
	ZCF8				orf19.6770
	ZDS1				orf19.6805
	ZRT2				orf19.6809
	ZSF1				orf19.6816
					orf19.6843
					orf19.6852
					orf19.6852.1
					orf19.6855
					orf19.6864
					orf19.6869
					orf19.6887
					orf19.6888
					orf19.6897
					orf19.69
					orf19.69.2
					orf19.6905
					orf19.6911
					orf19.6912
					orf19.692
					orf19.6920
					orf19.693
					orf19.6949
					orf19.6968
					orf19.6978
					orf19.6979
					orf19.6983
					orf19.6984
					orf19.699
					orf19.7013
					orf19.7014
					orf19.7022
					orf19.7024
					orf19.7029
					orf19.7042
					orf19.7043
					orf19.7054
					orf19.7055
					orf19.7077
					orf19.7078
					orf19.7085
					orf19.7095
					orf19.7096
					orf19.715
					orf19.7152
					orf19.716
					orf19.7166
					orf19.719
					orf19.7196
					orf19.7243
					orf19.7250
					orf19.7260
					orf19.727
					orf19.7279.1
					orf19.7304
					orf19.732
					orf19.7328
					orf19.7329
					orf19.733
					orf19.7336
					orf19.7337
					orf19.7347
					orf19.7348
					orf19.7360
					orf19.7361
					orf19.7368
					orf19.7380
					orf19.741
					orf19.7425
					orf19.7433
					orf19.7445
					orf19.7455
					orf19.7459
					orf19.7464
					orf19.7480
					orf19.7497
					orf19.7502
					orf19.7506
					orf19.7567
					orf19.7578
					orf19.7590
					orf19.7598
					orf19.7642
					orf19.775
					orf19.787
					orf19.787.1
					orf19.828
					orf19.850
					orf19.867
					orf19.871
					orf19.872
					orf19.894
					orf19.9
					orf19.90
					orf19.909.1
					orf19.93
					orf19.938
					orf19.948
					orf19.949
					orf19.951
					orf19.972
					ORM1
					OSM1
					OSM2
					OST1
					OYE23
					PAN3
					PBS2
					PCK1
					PCL1
					PCL2
					PDA1
					PDB1
					PDC11
					PDR16
					PDS5
					PEA2
					PET9
					PEX13
					PEX14
					PEX19
					PEX5
					PFY1
					PGA13
					PGA14
					PGA16
					PGA18
					PGA23
					PGA32
					PGA34
					PGA38
					PGA45
					PGA46
					PGA53
					PGA54
					PGA56
					PGA59
					PGA6
					PGA62
					PGA63
					PGA7
					PGI1
					PGK1
					PGM2
					PHA2
					PHHB
					PHM5
					PHM7
					PHO8
					PHR2
					PIL1
					PIN3
					PLB3
					PLB5
					PLD1
					PMA1
					PMC1
					PMI1
					PMM1
					POX1
					POX18
					PPS1
					PRE4
					PRN1
					PSD1
					PSP1
					PST1
					PST3
					PTH1
					PTH2
					PTP1
					PTP2
					PTP3
					PTR22
					PUT1
					QCR6
					QDR1
					RAC1
					RAD53
					RAS1
					RAS2
					RBR1
					RBT1
					RBT4
					RCH1
					RCT1
					RDH54
					RDI1
					RDN5
					REG1
					REV3
					RFG1
					RFX2
					RGA2
					RGD1
					RGS2
					RGT1
					RHA1
					RHB1
					RHD1
					RHO1
					RHO2
					RHR2
					RIM101
					RIM8
					RKI1
					RME1
					RMT2
					RNH35
					RNR1
					RNR21
					ROA1
					ROB1
					RPC31
					RPL11
					RPL13
					RPL4B
					RPM2
					RPN3
					RPP1A
					RPP2A
					RPR1
					RPS1
					RPS12
					RPS16A
					RPS18
					RPS19A
					RPS23A
					RPS24
					RPS27A
					RPS42
					RPS5
					RPS7A
					RSN1
					RSR1
					RTA2
					RTA4
					RTF1
					SAC7
					SAH1
					SAM2
					SAP5
					SAP6
					SAP7
					SAP9
					SBP1
					SCP1
					SCR1
					SCS7
					SDS24
					SEC14
					SEC18
					SEC22
					SEC4
					SEC62
					SEF1
					SEF2
					SFC1
					SFL1
					SGS1
					SHA3
					SHE3
					SIR2
					SKN1
					SKN7
					SKO1
					SKY2
					SLM2
					SLN1
					SLP3
					SLR1
					SMC1
					SMC6
					SMD3
					SMF12
					SMI1
					SMM1
					SMP3
					SNG3
					SNG4
					SNM1
					SNO1
					SNZ1
					SOD5
					SOD6
					SOK1
					SPE2
					SPT23
					SRB1
					SRD1
					SRV2
					SSA2
					SSC1
					SSN6
					SSR1
					SSU1
					SSU81
					SSY5
					STE50
					STF2
					STP2
					STP4
					STR2
					SUC1
					SUL2
					SUN41
					SUR2
					SUR7
					SUT1
					SWD2
					SWE1
					TCC1
					TDH3
					TEC1
					TEF1
					TEF4
					TEM1
					TEN1
					TFC4
					TGL99
					THR4
					TIM17
					TIM22
					TLO1
					TLO34
					TLO5
					TNA1
					TOS1
					TPD3
					TPI1
					TPK2
					TPM2
					TPO3
					TPO4
					TPS2
					TPS3
					TRM12
					TRR1
					TRY2
					TUB1
					TUS1
					TYE7
					UAP1
					UBC4
					UBI3
					UBI4
					UBP13
					UEC1
					UGA3
					UGA33
					UGA4
					UTP20
					UTP22
					UTR2
					VAM3
					VHR1
					VID21
					VMA6
					VPH1
					VPH2
					VPS21
					VPS41
					VPS53
					VTI1
					WAR1
					WBP1
					WOR2
					WOR3
					WSC2
					XUT1
					XYL2
					YCK2
					YCP4
					YDC1
					YHB1
					YHB5
					YKE2
					YKT6
					YMX6
					YOR1
					YPS7
					YPT7
					YPT72
					YTH1
					ZCF14
					ZCF20
					ZCF25
					ZCF27
					ZCF3
					ZCF31
					ZCF39
					ZCF8
					ZDS1
					ZRC1
					ZRT2
					ZSF1
					ZWF1
