# Supplementary material for: Ume6 protein complexes connect morphogenesis, adherence and hypoxic genes to shape Candida albicans biofilm architecture
Source: Nat Microbiol. 2025 Aug 21;10(9):2231–44. doi: 10.1038/s41564-025-02094-5 (PMC12408341; doi:10.1038/s41564-025-02094-5)
Supplement: Supplementary file 6 — Strains used in this study. [file 41564_2025_2094_MOESM6_ESM.xlsx]

## Sheet: Strain list
Strain number	Strain	Description / Genotype	Notes	Reference
MH203	SC5314	Candida albicans clinical isolates	WT	Huang et al., 2019
MH199	P76067	Candida albicans clinical isolates	WT	Huang et al., 2019
MH200	P57055	Candida albicans clinical isolates	WT	Huang et al., 2019
MH201	P87	Candida albicans clinical isolates	WT	Huang et al., 2019
MH202	P75010	Candida albicans clinical isolates	WT	Huang et al., 2019
MH216	SC5314 his1Δ/Δ	his1Δ::r3NAT1r3/his1Δ::r3NAT1r3	homozygous	Huang et al., 2019
MH204	P76067 his1Δ/Δ	his1Δ::r3NAT1r3/his1Δ::r3NAT1r3	homozygous	Huang et al., 2019
MH207	P57055 his1Δ/Δ	his1Δ::r3NAT1r3/his1Δ::r3NAT1r3	homozygous	Huang et al., 2019
MH210	P87 his1Δ/Δ	his1Δ::r3NAT1r3/his1Δ::r3NAT1r3	homozygous	Huang et al., 2019
MH213	P75010 his1Δ/Δ	his1Δ::r3NAT1r3/his1Δ::r3NAT1r3	homozygous	Huang et al., 2019
MH250	SC5314 ume6 Δ/Δ	ume6Δ::rHIS1r/ume6Δ::rHIS1r his1Δ::r3/his1Δ::r3	homozygous	Huang et al., 2019
MH245	P76067 ume6 Δ/Δ	ume6Δ::rHIS1r/ume6Δ::rHIS1r his1Δ::r3/his1Δ::r3	homozygous	Huang et al., 2019
MH247	P57055 ume6 Δ/Δ	ume6Δ::rHIS1r/ume6Δ::rHIS1r his1Δ::r3/his1Δ::r3	homozygous	Huang et al., 2019
MH248	P87 ume6 Δ/Δ	ume6Δ::rHIS1r/ume6Δ::rHIS1r his1Δ::r3/his1Δ::r3	homozygous	Huang et al., 2019
MH249	P75010 ume6 Δ/Δ	ume6Δ::rHIS1r/ume6Δ::rHIS1r his1Δ::r3/his1Δ::r3	homozygous	Huang et al., 2019
ED25	SC5314 Ume6-HA-ACT1 term	Ume6-3XHA-ACT1term-HIS1/Ume6-3XHA-ACT1term-HIS1, his1Δ::r3NAT1r3/his1Δ::r3NAT1r3	homozygous	This study
ED63	P76067 Ume6-HA-ACT1 term	Ume6-3XHA-ACT1term-HIS1/Ume6-3XHA-ACT1term-HIS1, his1Δ::r3NAT1r3/his1Δ::r3NAT1r3	homozygous	This study
ED65	P57055 Ume6-HA-ACT1 term	Ume6-3XHA-ACT1term-HIS1/Ume6-3XHA-ACT1term-HIS1, his1Δ::r3NAT1r3/his1Δ::r3NAT1r3	homozygous	This study
ED68	P87 Ume6-HA-ACT1 term	Ume6-3XHA-ACT1term-HIS1/Ume6-3XHA-ACT1term-HIS1, his1Δ::r3NAT1r3/his1Δ::r3NAT1r3	homozygous	This study
ED73	P75010 Ume6-HA-ACT1 term	Ume6-3XHA-ACT1term-HIS1/Ume6-3XHA-ACT1term-HIS1, his1Δ::r3NAT1r3/his1Δ::r3NAT1r3 (extended homology method using overlap PCR)	homozygous	This study
YM154	SC5314 PRBT5-UME6/WT	NAT1-PRBT5-UME6::NAT1-PRBT5-UME6	homozygous	Mao et al., 2022
YM150	SC5314 PRBT5-UME6/efg1Δ/Δ	efg1Δ::rHIS1r/efg1Δ::rHIS1r, his1Δ::r3/his1Δ::r3, NAT1-PRBT5-UME6::NAT1-PRBT5-UME6	homozygous	Mao et al., 2022
ED1329	SC5314 PRBT5-UME6/brg1Δ/Δ	brg1Δ::rHIS1r/brg1Δ::rHIS1r, his1Δ::r3/his1Δ::r3, NAT1-PRBT5-UME6::NAT1-PRBT5-UME6	homozygous	This study
ED1302	P75010 PRBT5-UME6/WT	NAT1-PRBT5-UME6::NAT1-PRBT5-UME6	homozygous	This study
ED1304	P75010 PRBT5-UME6/efg1Δ/Δ	efg1Δ::rHIS1r/efg1Δ::rHIS1r, his1Δ::r3/his1Δ::r3, NAT1-PRBT5-UME6::NAT1-PRBT5-UME6	homozygous	This study
ED1307	P75010 PRBT5-UME6/brg1Δ/Δ	brg1Δ::rHIS1r/brg1Δ::rHIS1r, his1Δ::r3/his1Δ::r3, NAT1-PRBT5-UME6::NAT1-PRBT5-UME6	homozygous	This study
ED1773	PRBT5-UME6-HA/WT	Ume6-3XHA-ACT1term-HIS1/Ume6-3XHA-ACT1term-HIS1, his1Δ::r3/his1Δ::r3, NAT1-PRBT5-UME6::NAT1-PRBT5-UME6	homozygous	This study
ED1789	PRBT5-UME6-HA/efg1Δ/Δ	efg1Δ::r1/efg1Δ::r1, his1Δ::r3/his1Δ::r3, NAT1-PRBT5-UME6-3xHA-CdHIS1::NAT1-PRBT5-UME6-3xHA-CdHIS1	homozygous	This study
ED1770	UME6-HA/efg1Δ/Δ	efg1Δ::r1/efg1Δ::r1, his1Δ::r3/his1Δ::r3, UME6-3xHA-NAT1::UME6-3xHA-NAT1	homozygous	This study
ED1228	Ume6 (R772A)-HA	ume6Δ::UME6(R772A)-HA-CdHIS1/ume6Δ::UME6(R772A)-HA-CdHIS1 his1Δ::r3/his1Δ::r3	homozygous	This study
ED1862	PRBT5-Ume6 (R772A)-HA	his1Δ/Δ:r3, ume6Δ/Δ:pRBT5-UME6(R772A)-HA-CdHIS1	homozygous	This study
ED1868	PRBT5-Ume6 (R772A)-HA/efg1Δ/Δ	his1Δ/Δ:r3, efg1Δ/Δ:r1, ume6Δ/Δ:pRBT5-UME6(R772A)-HA-CdHIS1	homozygous	This study
ED1138	Ume6 (1-720)-HA	UME6 (1-720)-3XHA-ACT11term-HIS1/UME6 (1-720)-3XHA-ACT1term-HIS1, his1Δ::r3NAT1r3/his1Δ::r3NAT1r3	homozygous	This study
ED1379	PRBT5-Ume6 (1-720)-HA	ume6Δ::pRBT5-UME6(1-720)-HA-HIS/ume6Δ::pRBT5-UME6(1-720)-HA-HIS his1Δ::r3/his1Δ::r3	homozygous	This study
ED1140	Ume6 (1-759)-HA	UME6 (1-759)-3XHA-ACT11term-HIS1/UME6 (1-759)-3XHA-ACT1term-HIS1, his1Δ::r3NAT1r3/his1Δ::r3NAT1r3	homozygous	This study
ED1420	PRBT5-Ume6 (1-759)-HA	ume6Δ::pRBT5-UME6(1-759)-HA-HIS/ume6Δ::pRBT5-UME6(1-759)-HA-HIS his1Δ::r3/his1Δ::r3	homozygous	This study
ED2110	Ume6 (720-843)-HA	Ume6720-843-3XHA-ACT1term-NAT1/Ume6720-843-3XHA-ACT1term-NAT1, ume6Δ::rHIS1r/ume6Δ::rHIS1r his1Δ::r3/his1Δ::r3	homozygous	This study
ED2128	PRBT5-Ume6 (720-843)-HA	ume6Δ::PRBT5-UME6 (720-843)-3xHA-ACT1term-HIS1/ume6Δ::PRBT5-UME6 (720-843)-3xHA-ACT1term-HIS1, his1Δ::r3/his1Δ::r3	homozygous	This study
ED2142	PRBT5-Ume6 (720-843)-HA (heterozygote)	ume6Δ::PRBT5-UME6 (720-843)-3xHA-ACT1term-HIS1/ume6Δ::NAT1, his1Δ::r3/his1Δ::r3	heterozygous	This study
ED2133	PRBT5-Ume6 (720-843)-HA/efg1Δ/Δ	ume6Δ::PRBT5-UME6 (720-843)-3xHA-ACT1term-HIS1/ume6Δ::NAT1, efg1Δ::r1/efg1Δ::r1 his1Δ::r3/his1Δ::r3	homozygous	This study
ED2147	PRBT5-UME6 (hetetrozygote)	Ume6-3XHA-ACT1term-HIS1/UME6, his1Δ::r3/his1Δ::r3, NAT1-PRBT5-UME6::NAT1-PRBT5-UME6	heterozygous	This study
ED11	Efg1-FLAG/WT	EFG1-3XFLAG-ACT1term-HIS1/EFG1-3XFLAG-ACT1term-HIS1, his1Δ::r3NAT1r3/his1Δ::r3NAT1r3	homozygous	Do et al., 2022
ED971	Efg1-FLAG/Ume6-HA	EFG1-3XFLAG-ACT1term-HIS1/EFG1-3XFLAG-ACT1term-HIS1, his1Δ::r3/his1Δ::r3, Ume6-3XHA-ACT1term-NAT1/Ume6-3XHA-ACT1term-NAT1	homozygous	This study
ED1352	Efg1-FLAG/Ume6 (1-720)-HA	EFG1-3XFLAG-ACT1term-HIS1/EFG1-3XFLAG-ACT1term-HIS1, his1Δ::r3/his1Δ::r3, Ume61-720-3XHA-ACT1term-NAT1/Ume61-720-3XHA-ACT1term-NAT1	homozygous	This study
ED1354	Efg1-FLAG/Ume6 (1-759)-HA	EFG1-3XFLAG-ACT1term-HIS1/EFG1-3XFLAG-ACT1term-HIS1, his1Δ::r3/his1Δ::r3, Ume61-759-3XHA-ACT1term-NAT1/Ume61-759-3XHA-ACT1term-NAT1	homozygous	This study
ED2116	Efg1-FLAG/Ume6 (720-843)-HA	EFG1-3XFLAG-ACT1term-HIS1/EFG1-3XFLAG-ACT1term-HIS1, UME6249-843-HA-NAT1/UME6249-843-HA-NAT1 his1Δ::r3/his1Δ::r3	homozygous	This study
ED2064	Efg1-FLAG/Ume6 (R772A)-HA	EFG1-3XFLAG-ACT1term-NAT1/EFG1-3XFLAG-ACT1term-NAT1, ume6Δ::UME6(R772A)-HA-CdHIS1/ume6Δ::UME6(R772A)-HA-CdHIS1 his1Δ::r3/his1Δ::r3	homozygous	This study
ED1447	Ndt80-FLAG/WT	NDT80-3XFLAG-ACT1term-HIS1/NDT80-3XFLAG-ACT1term-HIS1, his1Δ::r3/his1Δ::r3	homozygous	This study
ED1880	Ndt80-FLAG/Ume6-HA	his1Δ/Δ:r3, Ndt80-FLAG-CdHIS1/Ndt80-FLAG-CdHIS1, Ume6-HA-NAT1/Ume6-HA-NAT1	homozygous	This study
ED2098	Ndt80-FLAG/Ume6 (1-720)-HA	NDT80-3XFLAG-ACT1term-HIS1/NDT80-3XFLAG-ACT1term-HIS1, his1Δ::r3/his1Δ::r3, UME61-720-HA-NAT1/UME61-720-HA-NAT1 his1Δ::r3/his1Δ::r3	homozygous	This study
ED2102	Ndt80-FLAG/Ume6 (1-759)-HA	NDT80-3XFLAG-ACT1term-HIS1/NDT80-3XFLAG-ACT1term-HIS1, his1Δ::r3/his1Δ::r3, UME61-759-HA-NAT1/UME61-759-HA-NAT1 his1Δ::r3/his1Δ::r3	homozygous	This study
ED2117	Ndt80-FLAG/Ume6 (720-843)-HA	NDT80-3XFLAG-ACT1term-HIS1/NDT80-3XFLAG-ACT1term-HIS1, his1Δ::r3/his1Δ::r3, UME6249-843-HA-NAT1/UME6249-843-HA-NAT1 his1Δ::r3/his1Δ::r3	homozygous	This study
ED2042	Ndt80-FLAG/Ume6 (R772A)-HA	NDT80-3XFLAG-ACT1term-NAT1/NDT80-3XFLAG-ACT1term-NAT, ume6Δ::UME6(R772A)-HA-CdHIS1/ume6Δ::UME6(R772A)-HA-CdHIS1 his1Δ::r3/his1Δ::r3	homozygous	This study
ED1471	Upc2-FLAG/WT	UPC2-3XFLAG-ACT1term-HIS1/UPC2-3XFLAG-ACT1term-HIS1, his1Δ::r3/his1Δ::r3	homozygous	This study
ED1878	Upc2-FLAG/Ume6-HA	UPC2-FLAG-CdHIS1/UPC2-FLAG-CdHIS1, Ume6-HA-NAT1/Ume6-HA-NAT1, his1Δ/Δ:r3,	homozygous	This study
ED2170	Upc2-FLAG/Ume6 (1-720)-HA	UPC2-3XFLAG-ACT1term-HIS1/UPC2-3XFLAG-ACT1term-HIS1, his1Δ::r3/his1Δ::r3, UME61-720-HA-NAT1/UME61-720-HA-NAT1 his1Δ::r3/his1Δ::r3	homozygous	This study
ED2174	Upc2-FLAG/Ume6 (1-759)-HA	UPC2-3XFLAG-ACT1term-HIS1/UPC2-3XFLAG-ACT1term-HIS1, his1Δ::r3/his1Δ::r3, UME61-759-HA-NAT1/UME61-759-HA-NAT1 his1Δ::r3/his1Δ::r3	homozygous	This study
ED2118	Upc2-FLAG/Ume6 (720-843)-HA	UPC2-3XFLAG-ACT1term-HIS1/UPC2-3XFLAG-ACT1term-HIS1, his1Δ::r3/his1Δ::r3, UME6249-843-HA-NAT1/UME6249-843-HA-NAT1 his1Δ::r3/his1Δ::r3	homozygous	This study
ED2046	Upc2-FLAG/Ume6 (R772A)-HA	UPC2-3XFLAG-ACT1term-NAT1/UPC2-3XFLAG-ACT1term-NAT, ume6Δ::UME6(R772A)-HA-CdHIS1/ume6Δ::UME6(R772A)-HA-CdHIS1 his1Δ::r3/his1Δ::r3	homozygous	This study
ED2086	upc2Δ/Δ	upc2Δ::KAN/upc2Δ::KAN	homozygous	This study
ED2114	upc2Δ/Δ + UPC2-FLAG	upc2Δ::UPC2-3xFLAG-ACT1term-NAT1/upc2Δ::UPC2-3xFLAG-ACT1term-NAT1	homozygous	This study
ED2194	upc2Δ/Δ + PRBT5-UME6-HA	Ume6-3XHA-ACT1term-HIS1/Ume6-3XHA-ACT1term-HIS1, his1Δ::r3/his1Δ::r3, NAT1-PRBT5-UME6::NAT1-PRBT5-UME6, upc2Δ::KAN/upc2Δ::KAN	homozygous	This study
KG11	ndt80Δ/Δ	ndt80Δ::rHIS1r/ndt80Δ::rHIS1r his1Δ::r3/his1Δ::r3	homozygous	This study
ED2208	ndt80Δ/Δ + PRBT5-UME6-HA	ume6Δ::pRBT5-UME6-HA-HIS/ume6Δ::pRBT5-UME6-HA-HIS his1Δ::r3/his1Δ::r3, ndt80Δ::rNAT1r/ndt80Δ::rNAT1r	homozygous	This study
LX9	sef1Δ/Δ	sef1Δ::NAT/sef1Δ::NAT	homozygous	Xiong et al., 2023
ED2216	Sef1-FLAG	SEF1::SEF1-3xFLAG-NAT/SEF1::SEF1-3xFLAG-NAT	homozygous	This study
ED2220	Sef1-FLAG/Ume6-HA	SEF1::SEF1-3xFLAG-NAT/SEF1::SEF1-3xFLAG-NAT, , Ume6-HA-CdHIS1/Ume6-HA-CdHIS1, his1Δ/Δ:r3,	homozygous	This study
ED1234	Ume6H775L-HA	ume6Δ::UME6(H775L)-HA-CdHIS1/ume6Δ::UME6(H775L)-HA-CdHIS1 his1Δ::r3/his1Δ::r3	homozygous	This study
ED1239	P75010 Ume6R772A-HA	ume6Δ::UME6(R772A)-HA-CdHIS1/ume6Δ::UME6(R772A)-HA-CdHIS1 his1Δ::r3/his1Δ::r3	homozygous	This study
ED1241	P75010 Ume6H775L-HA	ume6Δ::UME6(H775L)-HA-CdHIS1/ume6Δ::UME6(H775L)-HA-CdHIS1 his1Δ::r3/his1Δ::r3	homozygous	This study
ED1939	Ume6249-843-HA	ume6Δ::UME6(249-843)-HA-CdHIS1/ume6Δ::UME6(249-843)-HA-CdHIS1 his1Δ::r3/his1Δ::r3	homozygous	This study
ED1943	Ume6271-843-HA	ume6Δ::UME6(271-843)-HA-CdHIS1/ume6Δ::UME6(271-843)-HA-CdHIS1 his1Δ::r3/his1Δ::r3	homozygous	This study
ED1884	PRBT5-Ume6249-843-HA	his1Δ/Δ:r3, ume6Δ:pRBT5-UME6(249-843)-HA-CdHIS1/ume6Δ:pRBT5-UME6(249-843)-HA-CdHIS1	homozygous	This study
ED1881	PRBT5-Ume6271-843-HA	his1Δ/Δ:r3, ume6Δ:pRBT5-UME6(271-843)-HA-CdHIS1/ume6Δ:pRBT5-UME6(271-843)-HA-CdHIS1	homozygous	This study
ED1859	efg1Δ/Δ PRBT5-Ume6249-843-HA	his1Δ/Δ:r3, efg1Δ/Δ:r1, ume6Δ:pRBT5-UME6(249-843)-HA-CdHIS1/ume6Δ:pRBT5-UME6(249-843)-HA-CdHIS1	homozygous	This study
ED1858	efg1Δ/Δ PRBT5-Ume6271-843-HA	his1Δ/Δ:r3, efg1Δ/Δ:r1, ume6Δ:pRBT5-UME6(271-843)-HA-CdHIS1/ume6Δ:pRBT5-UME6(271-843)-HA-CdHIS1	homozygous	This study
References
Huang, M. Y., Woolford, C. A., May, G., McManus, C. J. & Mitchell, A. P. Circuit diversification in a biofilm regulatory network. PLoS Pathog 15, e1007787 (2019). https://doi.org:10.1371/journal.ppat.1007787
Do, E. et al. Collaboration between Antagonistic Cell Type Regulators Governs Natural Variation in the Candida albicans Biofilm and Hyphal Gene Expression Network. mBio 13, e0193722 (2022). https://doi.org:10.1128/mbio.01937-22
Xiong, L. et al. Biofilm-associated metabolism via ERG251 in Candida albicans. PLoS Pathog 20, e1012225 (2024). https://doi.org:10.1371/journal.ppat.1012225
Mao Y, Solis NV, Sharma A, Cravener MV, Filler SG, Mitchell AP. Use of the Iron-Responsive RBT5 Promoter for Regulated Expression in Candida albicans. mSphere. 2022 Aug 31;7(4):e0030522. doi: 10.1128/msphere.00305-22. Epub 2022 Jul 18. PMID: 35862800; PMCID: PMC9429880.
