# Supplementary material for: Ume6 protein complexes connect morphogenesis, adherence and hypoxic genes to shape Candida albicans biofilm architecture
Source: Nat Microbiol. 2025 Aug 21;10(9):2231–44. doi: 10.1038/s41564-025-02094-5 (PMC12408341; doi:10.1038/s41564-025-02094-5)
Supplement: Supplementary file 7 — Plasmids and primers used in this study. [file 41564_2025_2094_MOESM7_ESM.xlsx]

## Sheet: Primer list
Ume6-tag
UME6_F-FLAG	AAGTTTCATTGATTAGGAAAAGAAATCAAGCTAAAACAAAAATTTCTCGGAAAAAATCAAGTAATGATATAACCAATGAT GACTACAAAGACCATGACGGTG
UME6_F-HA	AAGTTTCATTGATTAGGAAAAGAAATCAAGCTAAAACAAAAATTTCTCGGAAAAAATCAAGTAATGATATAACCAATGAT TACCCATACGATGTTCCTGACTATG
UME6_R(reverse + complemented)	AACCTTGACTTGTTGGAATCTTCTACGGGAAAAGTTGCAAGAGTTGGTGTAAAATCAAATGGACCAAAATATTACGAGAA TTTCCCAGTCACGACGTT
SNR52/R_UME6term	GTTAATTCTTAATTCTTAACCAAATTAAAAATAGTTTACGCAAGTC
sgRNA/F_UME6term	GTTAAGAATTAAGAATTAACGTTTTAGAGCTAGAAATAGCAAGTTAAA
UME6-tag_confirm_F	CAGGATCTGGAAGTTGTAGTGATG
UME6-tag_confirm_R	CAACAATAACCACCGTCAACCGTC
UME6_3UTR_R	CTAGACATTGATATGGATCATAGCCC
SNR52/R_UME6_2	CCGTCAACCGTCAACCTGTT CAAATTAAAAATAGTTTACGCAAGTC
sgRNA/F_UME6_2	AACAGGTTGACGGTTGACGG GTTTTAGAGCTAGAAATAGCAAGTTAAA
primers for sequencing confirmation
UME6_Confirm_UpstreamF	CTATATCTTCACTCCAAACATCAATATCCTCAAT
UME6_Confirm_intR-1	GTGTTGATAATGAATGAACTAAATTTGCCC
UME6_Confirm_intF-2	TCCACTTTACCATTATCCAAGTCTACTC
UME6_Confirm_intF-4	GTTGTCAATGAAGAACCACAAGTCAAGA
ChIP-qPCR primers
Ece1_Ume6_F	ACGTTATACTTTGAACAAGATACACAAAGAGT
Ece1_Ume6_R	GCAGAATTTACTGATCCTATTGGGTGCA
Hwp1_Ume6_F	AGCTGGGTCTAGTAATGTTGTGCATATG
Hwp1_Ume6_R	ACAGAAATGGCACTGATAGGTACTATAAAA
Hyr1_Ume6_F	TCGTCATCAGTCAACATTGACATGAAG
Hyr1_Ume6_R	ACTTATCCACATTTGCAAGACAAACTGC
Hgc1_Ume6_F	TTCTGGTCCCACTACTTACATTTTAGAC
Hgc1_Ume6_R	ATTAAAGTGTTGGGTATTGGTTTGATGCTT
ERG251_Ume6/F	TTTCTCAATTTCTGTTTTGACCA
ERG251_Ume6/R	GGTAACAACAACAACAACAGT
ume6 mutant marker recycling
Ume6 far down/R	AGGTTTAGACTTTTCCGTATGATGAAACA
Ume6 NAT-F	TCATATTCTATATCTTCACTCCAAACATCAATATCCTCAATTTACTTCCAATTAGTTTTATTTTTTAATCCACTGTATAA tttcccagtcacgacgtt
Ume6 NAT-R	ACCAACGGCAACAACAACAACAACAATAACCACCGTCAACCGTCAACCTGTTAATTCTTAATTCTTAACTTAGCCTAATT TGTGGAATTGTGAGCGGATA
Common primers
NAT_CRIME_F2	TCACAGACGCGTTGAATTGTCCCCA
NAT_CRIME_R2	ACACCATGACCTCTATGTTCTGGAGCA
Zinc cluster mutations
Ume6_5'_R772A_R	TAAGCAGGTTTTTCAGAACTATAATCACATTGTAATCCAAATTTAGCACAACCTCCACAAATTGGTGTGACTTCATCACA TTTCAAATGTTTAATTGC ACAAATCCAACA
Ume6_5'_H774L_R	TAAGCAGGTTTTTCAGAACTATAATCACATTGTAATCCAAATTTAGCACAACCTCCACAAATTGGTGTGACTTCATCACA TTTCAAAAGTTTAATTCG ACAAATCCAACA
Ume6_5'_R772A_F	TGTTGGATTTGTgcaATTAAACATTTGAAATGT
Ume6_5'_H774L_F	TGTCGAATTAAActtTTGAAATGTGATGA
Ume6_H4 -> L_F	TCGAATTAAActtTTGAAATGTGATG
Ume6_H4 -> L_R	CAAATCCAACATCCTTTTTTAG
Ume6_R1 -> A_F	TTGGATTTGTgcaATTAAACATTTGAAATG
Ume6_R1 -> A_R	CATCCTTTTTTAGATCTAGG
UPC2-tag
Upc2_tag_F	TAGATACTGATAATCTTCCAAGCGTCCTTACCAGTAATTTAGACTTAATGCAAGGTGATAATGGGTTTATGAATATGAAA GACTACAAAGACCATGACGGTG
Upc2_tag_R	AAATTCCTATCATCTACGCGGTATTGACCTGTCAAAAAAAAATTTTTTTTTGTACATTAATTATTAAGCATATTAGTAAA TTTCCCAGTCACGACGTT
Upc2_orf_int/F	AGAATGTCACGATGCAGATATTGCA
Upc2_3'_int/F	TGACAGGTCAATACCGCGTAGATGA
Upc2_check/R	TCGTAATCTTCTTGACCAGCAGTATCA
sgRNA/F Upc2_tag-1	GTAAATTCCTATCATCTACG GTTTTAGAGCTAGAAATAGCAAGTTAAA
SNR52/R Upc2_tag-1	CGTAGATGATAGGAATTTAC CAAATTAAAAATAGTTTACGCAAGTC
sgRNA/F Upc2_tag-2	GGTTTATTACAACACTAGCC GTTTTAGAGCTAGAAATAGCAAGTTAAA
SNR52/R Upc2_tag-2	GGCTAGTGTTGTAATAAACC CAAATTAAAAATAGTTTACGCAAGTC
Ndt80-tag
Ndt80_tag_F	GCAGATCTCCGTCAAGCTACCACAAAGATAGAACTTCTGGGTATAGGGCTACAAACACCCCAACCCCTACTCCTCCACAG GACTACAAAGACCATGACGGTG
Ndt80_tag_R	TGGGGCAGTTACGGCTATAAATAAGATTACTATTACAAATAAAAGCTTTATATATGTATCAGTGTATATATTTTGTGATC TTTCCCAGTCACGACGTT
Ndt80_orf_int/F	TGTTCTGATGAAGATGTTGCCATCTC
Ndt80_check/R	TCGCCAGTACTTGACGAGTCACTATTA
sgRNA/F Ndt80_tag-1	TTTTTGATGATGACGAAGAA GTTTTAGAGCTAGAAATAGCAAGTTAAA
SNR52/R Ndt80_tag-1	TTCTTCGTCATCATCAAAAA CAAATTAAAAATAGTTTACGCAAGTC
UME6 overexpression
Multipromoter UME6/R	ttcaactttattgtatcttctccataaggcgaatttggtgctgaagaagttgaatcgggtgtaaccatatgggtaatcat CGTTGGGAGCTCTCCCAATG
UME6p sgRNA/F	caagaaaattatcaaattctgttttagagctagaaatagcaagttaaa
UME6p SNR52/R	agaatttgataattttcttgcaaattaaaaatagtttacgcaagtc
Ume6_far_check/up	TGGTTGCAACTAAACCCATTACACT
pRBT5_int/F	TGCGAACCAAATTTGGAAGAATGGAA
Ume6upstream->pRBT5_F	AAAAAAGAATTCTTCGTAATATCTATATAGATATCTTCATTTAATTTTCTTGGTTGTTTGATATTACTTTGTTGTACTTT TGTCGATTCGATACTAACGCAATCACTA
NDT80/Upc2 tag
Ndt80_tag_R (FLAG-NAT)	TGGGGCAGTTACGGCTATAAATAAGATTACTATTACAAATAAAAGCTTTATATATGTATCAGTGTATATATTTTGTGATC TGATTGCGTTAGTATCGAATCGACAG
Upc2_tag_R (FLAG-NAT)	AAATTCCTATCATCTACGCGGTATTGACCTGTCAAAAAAAAATTTTTTTTTGTACATTAATTATTAAGCATATTAGTAAA TGATTGCGTTAGTATCGAATCGACAG
upc2 deletion
UPC2_dc_Kan/F	TTCATTGAAGATATAGTTTTCAACCACTATTACTACCTTTCTATTTTTTTAAATTTTTTTTTTCAACAAAAAAGCCATTT tataaaatagccacccaaggcatttct
UPC2_dc_Kan/R	AAATTCCTATCATCTACGCGGTATTGACCTGTCAAAAAAAAATTTTTTTTTGTACATTAATTATTAAGCATATTAGTAAA acaggaaacagctatgaccatgat
sgRNA/F UPC2_dc_1	AGTGCCGATAACTTCCATGG GTTTTAGAGCTAGAAATAGCAAGTTAAA
SNR52/R UPC2_dc_1	CCATGGAAGTTATCGGCACT CAAATTAAAAATAGTTTACGCAAGTC
sgRNA/F UPC2_dc_2	CTGGAGATGTCAAGGCCATG GTTTTAGAGCTAGAAATAGCAAGTTAAA
SNR52/R UPC2_dc_2	CATGGCCTTGACATCTCCAG CAAATTAAAAATAGTTTACGCAAGTC
Upc2_check/F	ACATTGATCTACGTTATTCAGCTTTCC
Upc2 check int/R	AGTCGGATGCAGCTGATACAGTGGA
ndt80 deletion
NDT80_dc_HygB/F	ACCACCACCAGCTTCCTCACCATCCTATTCACTATCATGGTATTGCTCAGCAACAACAGTCCCAGCTTCCTCATTTCGCT ccacctgacgtcgtatagtg
NDT80_dc_HygB/R	TTTGTGATCTTTTGTGTAATTATAATACAAAATTTTTTTATTTACTTTAAACTTTAAAATCAACCTTTCTTCGTCATCAT acaggaaacagctatgaccatgat
HygB int/F	ttggctggttctccaagattgaga
UPC2 complementation
Upc2 far check/F	TAACCATTAGGAACGAGCTATACGACT
sgRNA/F KAN_dc_1	gattatctattccgtacttc GTTTTAGAGCTAGAAATAGCAAGTTAAA
SNR52/R KAN_dc_1	gaagtacggaatagataatc CAAATTAAAAATAGTTTACGCAAGTC
sgRNA/F KAN_dc_2	tcgtatgaataacgggttgg GTTTTAGAGCTAGAAATAGCAAGTTAAA
SNR52/R KAN_dc_2	ccaacccgttattcatacga CAAATTAAAAATAGTTTACGCAAGTC
Upc2 orf far check/F	TTGGGAGATTTAGGCGACATTATCA
UPC2-FLAG tag
sgRNA/F UPC2_tag_3	ATAGGAATTTACGACTGTGT GTTTTAGAGCTAGAAATAGCAAGTTAAA
SNR52/R UPC2_tag_3	ACACAGTCGTAAATTCCTAT CAAATTAAAAATAGTTTACGCAAGTC
sgRNA/F UPC2_tag_4	GTCAATACCGCGTAGATGAT GTTTTAGAGCTAGAAATAGCAAGTTAAA
SNR52/R UPC2_tag_4	ATCATCTACGCGGTATTGAC CAAATTAAAAATAGTTTACGCAAGTC
Upc2_tag_confirm/R	TAAACCCTACACAGTCGTAAATTCCTAT
3xHA_check/R	TTAAGCGTAATCTGGAACGTCATATGGA
Ume6 (1-720 and 1-759)
RBT5->Ume6 720_R	GAAGTAGAATCAGTATTGGTGTTAGTGCCATTACCACTGGTATTTTCATCACTACAACTTCCAGATCCTGTACCACTCAT CGTTGGGAGCTCTCCCATATG
Ume6pro->720/R	GTAGAAGTAGAATCAGTATTGGTGTTAGTGCCATTACCACTGGTATTTTCATCACTACAACTTCCAGATCCTGTACCACT CAT TTATACAGTGGATTAAAAAATAAAACTAATTGGAAG
Ume6_721_tag_F	GTTCAAATTCTACTCCTTCTACTACTACTAAAGGCAAGAAAATGAAATTAAACGTTGATTTGAACAATGGTGGTGGTAGT TACCCATACGATGTTCCTGACTATG
Ume6_760_tag_F	GTGGTAATGGCACTAACACCAATACTGATTCTACTTCTACTTCTAATCCAATGGTGAAGAAAAAACATACAAGAAGAAGA TACCCATACGATGTTCCTGACTATG
Ume6-tag-HygB
HygB -> Ume6down/R	AACCTTGACTTGTTGGAATCTTCTACGGGAAAAGTTGCAAGAGTTGGTGTAAAATCAAATGGACCAAAATATTACGAGAAacaggaaacagctatgaccatgat
ADH1term -> HygBUP/R	attccattttaggcgtgaggtaatcctttttctttgcctctagcaatatcgaacagcaagcactatacgacgtcaggtggCTCTTCTACAGGACCAATCAAGCAA
Ume6 (720-843)
Ume6_720-843/F	AGTGGTACAGGATCTGGAAGTTGTAGT
NAT -> CdHIS1 for pRBT5
CdHIS5'down->RBT5p/R	TTCTTGGTCACTACAATTCCACCTAACTGTTCTCACTATGTATCGGAACTTTTTCGGGATAGAAGTAGGATCATTAAAAAACCGAGCTCGGATCCACTAGTAAC
Ume6upstr->CdHIS1/F	AAAAAAGAATTCTTCGTAATATCTATATAGATATCTTCATTTAATTTTCTTGGTTGTTTGATATTACTTTGTTGTACTTT ACCGAGCTCGGATCCACTAGTAAC
RBT5p_int/R	TCTGTGGACTAATTCGGCACTAGTCT
RBT5p_far_check/F	TAGACTAGTGCCGAATTAGTCCACAGA
RBT5p_check/R2	ACTTATGCAGCTTGGCTTAATTACTCGA
AA down/R > RBT5p	TTCTTGGTCACTACAATTCCACCTAACTGTTCTCACTATGTATCGGAACTTTTTCGGGATAGAAGTAGGATCATTAAAAA TTTCCCAGTCACGACGTTGTAAAACG
AA_marker_RBT5/F	TTTTTAATGATCCTACTTCTATCCCGAAAAAG
marker down/R-YF/R_Ume6	AACCTTGACTTGTTGGAATCTTCTACGGGAAAAGTTGCAAGAGTTGGTGTAAAATCAAATGGACCAAAATATTACGAGAA ACGGCCAGTGAATTGTAATACGACT
ndt80 deletion
Ndt80/F_NAT	ACCACCACCAGCTTCCTCACCATCCTATTCACTATCATGGTATTGCTCAGCAACAACAGTCCCAGCTTCCTCATTTCGCT TTTCCCAGTCACGACGTT
Ndt80/R_NAT	TTTGTGATCTTTTGTGTAATTATAATACAAAATTTTTTTATTTACTTTAAACTTTAAAATCAACCTTTCTTCGTCATCAT TGATTGCGTTAGTATCGAATCGACAG
Ndt80_far_check/F	TCATTGAGTCCCCGTTCACTAGTACC
Ndt80 orf far check/F	TCGGCAACAAGTTCTACACTTACGA
Ndt80 3' check int/F	TGATGATGACGAAGAAAGGTTGATTT
qRT-PCR
CDC28_F	AGCTCGAGCATTTGGAGTTC
CDC28_R	CGGGAGCTCGATACCATAAA
ECE1/F	CTCAAGCTGCCATCATCCAC
ECE1/R	GAGGTGCAGGAACAGTAGGT
HGC1/F	ACAACAACAAAACCAAGGCCA
HGC1/R	GCACGAGAACCAGCGATACT
ERG251/F	TGCTTATTTGGCCACAGTTT
ERG251/R	ATCATGATGAGCAGCACCAG
qRT_ERG11_F1	GGTTTGGTTCTGCAGCTTCA
qRT_ERG11_R1	ACATCACCATACTTTTGACGACA
qRT_ERG4_F1	GCTTGTGCCAAAGGTGAAGA
qRT_ERG4_R1	ACCCCAGCAATGTTCCAAAA
qRT_ERG6_F1	GGTTGGGGTTCTTCATTCCA
qRT_ERG6_R1	ACCACCTACACCACAACCAA
qRT_CBP1_F	CCATCCTGATCAAGCTTGGC
qRT_CBP1_R	GGTTCGTTGTCCAATCGGTG
qRT_STF2_F	GGTTTACACACAATGGCCACT
qRT_STF2_R	CCCCAATTGTTCTTACCAGCA
qRT_AHP1_F	CATTTGTAATGGCAGCTTGGG
qRT_AHP1_R	CCCATACCTGCCAGAGTCAA
qRT_GLK1_F	GATTCCGAAACCGCTAACCC
qRT_GLK1_R	GCCTCTTGCCTTGTACAACT
qRT_MDH1-3_F	AGGGTGTGGCTGCAGATTTA
qRT_MDH1-3_R	CTTCCTTGTTTGCTGGCTGA
qRT_TPS3_F	TACCAGGGCAACTTTACCGT
qRT_TPS3_R	GATCAAGCTCCGCCATTCTG
qRT_HWP1_F	TGAACCTTCCCCAGTTGCTC
qRT_HWP1_R	ATAGCACCACTTGAGCCAGC
qRT_ALS3_F	TTGCGACTGCAAAGACAATC
qRT_ALS3_R	GACCAACCCAAAACAGCATTCC
qRT_RME1_F	ACACCGGAATCTCCACACAA
qRT_RME1_R	GAGGTAGCAGAGCCCAAAGA

## Sheet: Plasmids
Plasmid Name	Description:	Marker	Reference
pNAT	NAT cassette	ampR	Min et al., 2016
pV1093	Cas9, sgRNA cassette	ampR	Vyas et al., 2015
pSN52	HIS1 cassette	kanR	Noble and Johnson, 2005
pED3	HA-ACT1term-CdHIS1 cassette	kanR	This study
pED5	HA-ACT1term-NAT1 cassette	ampR	This study
pED1	FLAG-ACT1term-CdHIS1 cassette	kanR	This study
pED6	FLAG-ACT1term-NAT1 cassette	ampR	This study
pSFS2A-CaKan	Kan maker	Chloramphenicol	Park et al., 2022
pSFS2A-CaHygB	HygB marker	Chloramphenicol	Park et al., 2022
References
Min, K., Ichikawa, Y., Woolford, C. A. & Mitchell, A. P. Candida albicans Gene Deletion with a Transient CRISPR-Cas9 System. mSphere 1 (2016). https://doi.org:10.1128/mSphere.00130-16
Vyas VK, Barrasa MI, Fink GR. A Candida albicans CRISPR system permits genetic engineering of essential genes and gene families. Sci Adv. 2015;1(3):e1500248. doi: 10.1126/sciadv.1500248. PMID: 25977940; PMCID: PMC4428347.
Noble SM, Johnson AD. Strains and strategies for large-scale gene deletion studies of the diploid human fungal pathogen Candida albicans. Eukaryot Cell. 2005 Feb;4(2):298-309. doi: 10.1128/EC.4.2.298-309.2005. PMID: 15701792; PMCID: PMC549318.
Park SO, Frazer C, Bennett RJ. An Adjuvant-Based Approach Enables the Use of Dominant HYG and KAN Selectable Markers in Candida albicans. mSphere. 2022 Aug 31;7(4):e0034722. doi: 10.1128/msphere.00347-22. Epub 2022 Aug 15. PMID: 35968963; PMCID: PMC9429937.
